# Supplementary material for: Research on lncRNA related to drought resistance of Shanlan upland rice
Source: BMC Genomics. 2022 Apr 30;23:336. doi: 10.1186/s12864-022-08546-0 (PMC9055766; doi:10.1186/s12864-022-08546-0)
Supplement: Supplementary file 1 — Additional file 1: Table S001. lncRNA specifically expressed in drought. [file 12864_2022_8546_MOESM1_ESM.xlsx]

## Sheet: Sheet1
Table S001. lncRNA specifically expressed in drought
ID	CK1_FPKM	CK2_FPKM	CK3_FPKM	D1_FPKM	D2_FPKM	D3_FPKM	Pvalue	log2FC	regulated
MSTRG.5679.8	0	0	0	0.672842	0.305126	0.074607	4.06843e-06	7.75744	up
MSTRG.19712.1	0	0	0	0.371232	0.158267	0.316458	6.00991e-05	6.59337	up
MSTRG.37152.2	0	0	0	0.185098	0.175709	0.090176	8.80519e-05	6.17099	up
MSTRG.12865.1	0	0	0	0.080039	0.121143	0.035593	0.000155659	6.17385	up
MSTRG.43794.3	0	0	0	0.045122	0.004575	0.205083	0.000193213	7.98499	up
MSTRG.25047.1	0	0	0	0.426494	0.146554	0.611926	0.000216371	6.54919	up
MSTRG.28695.6	0	0	0	0.205956	0.226853	0.131892	0.000310471	5.80013	up
MSTRG.40205.1	0	0	0	0.580252	0.505582	0.21669	0.000343333	5.79578	up
MSTRG.22189.3	0	0	0	0.211057	0.073161	0.002699	0.000437929	6.957	up
MSTRG.3078.1	0	0	0	0.059861	0.115099	1.36536	0.000783564	7.31225	up
MSTRG.9426.1	0	0	0	0.310293	0.092139	0.500922	0.00112139	6.02239	up
MSTRG.41126.1	0	0	0	0.038468	0.04442	0.602947	0.00273893	6.62417	up
MSTRG.3901.1	0	0	0	0.125969	0.224506	0.458233	0.00274935	5.54259	up
MSTRG.2089.1	0	0	0	0.139642	0.048259	0.093227	0.00283111	5.26976	up
MSTRG.1418.1	0	0	0	0.16044	0.097717	0.284442	0.00366496	5.3254	up
MSTRG.30444.1	0	0	0	0.163517	0.054469	0.045437	0.00442153	5.01338	up
MSTRG.34719.3	0	0	0	0.032018	0.093479	0.267257	0.00442395	5.6492	up
MSTRG.41000.1	0	0	0	0.020419	0.079155	0.159115	0.004501	5.53019	up
MSTRG.2618.1	0	0	0	0.145928	0.142376	0.144191	0.0046047	4.96012	up
MSTRG.27254.1	0	0	0	0.153447	0.130665	0.159066	0.00582424	4.88951	up
MSTRG.37520.1	0	0	0	0.211399	0.20254	0.24381	0.00707126	4.83283	up
MSTRG.30784.1	0	0	0	0.18999	0.238284	0.334566	0.00776374	4.86569	up
MSTRG.7501.1	0	0	0	0.122313	0.154567	0.111443	0.00783387	4.72351	up
MSTRG.40794.3	0	0	0	0.260275	0.021943	0.067485	0.00798537	5.09211	up
MSTRG.12273.1	0	0	0	0.134386	0.134558	0.236274	0.00995428	4.79025	up
MSTRG.28858.1	0	0	0	0.151888	0.054078	0.088501	0.0110314	4.66674	up
MSTRG.10223.1	0	0	0	0.024985	0.015773	0.19619	0.0117221	5.34417	up
MSTRG.25178.1	0	0	0	0.204192	0.02514	0.055634	0.0125887	4.79779	up
MSTRG.43115.1	0	0	0	0.181125	0.090866	0.100747	0.0129813	4.51219	up
MSTRG.42160.3	0	0	0	0.078405	0.209992	0.081171	0.0143751	4.55833	up
MSTRG.29637.1	0	0	0	0.132109	0.018596	0.407601	0.0145924	5.23896	up
MSTRG.6731.1	0	0	0	0.176676	0.064991	0.09049	0.0153654	4.49067	up
MSTRG.37871.1	0	0	0	0.124641	0.08178	0.036539	0.0153787	4.454	up
MSTRG.8689.1	0	0	0	0.052501	0.144423	0.034972	0.0169937	4.54076	up
MSTRG.15410.1	0	0	0	0.024104	0.026381	0.220608	0.0171731	5.16467	up
MSTRG.43225.1	0	0	0	0.112516	0.149969	0.179973	0.0194991	4.40272	up
MSTRG.34319.1	0	0	0	0.026631	0.061617	0.116427	0.0200796	4.7061	up
MSTRG.8828.1	0	0	0	0.162676	0.152684	0.074473	0.0210976	4.2945	up
MSTRG.20433.1	0	0	0	0.02978	0.046082	0.15621	0.0224426	4.72405	up
MSTRG.2172.1	0	0	0	0.135113	0.053568	0.017644	0.0228563	4.3879	up
MSTRG.43795.1	0	0	0	0.175406	0.011996	0.156943	0.0236329	4.63638	up
MSTRG.27417.1	0	0	0	0.331504	0.055963	0.128074	0.0252003	4.34813	up
MSTRG.41149.1	0	0	0	0.083573	0.140018	0.171262	0.0255234	4.32279	up
MSTRG.6597.1	0	0	0	0.030962	0.027212	0.187985	0.026396	4.7424	up
MSTRG.35776.1	0	0	0	0.243275	0.116389	0.147007	0.026524	4.20294	up
MSTRG.36168.1	0	0	0	0.105197	0.284941	0.088847	0.0290182	4.25948	up
MSTRG.32565.1	0	0	0	0.12546	0.135091	0.105307	0.029985	4.13737	up
MSTRG.15519.1	0	0	0	0.04605	0.021445	0.203991	0.0305714	4.72385	up
MSTRG.36804.1	0	0	0	0.065338	0.265539	0.125373	0.0307999	4.3069	up
MSTRG.31381.1	0	0	0	0.21142	0.224967	0.039496	0.0312149	4.15841	up
MSTRG.3087.1	0	0	0	0.106709	0.082414	0.132484	0.0312808	4.1606	up
MSTRG.14440.1	0	0	0	0.118968	0.001475	0.124424	0.034888	4.37828	up
MSTRG.33788.1	0	0	0	0.237242	0.11487	0.079505	0.0353826	4.05784	up
MSTRG.13082.1	0	0	0	0.110434	0.090703	0.12054	0.0393997	4.00998	up
MSTRG.34463.1	0	0	0	0.168353	0.210237	0.119311	0.0398726	3.98494	up
MSTRG.29800.1	0	0	0	0.086506	0.084782	0.117259	0.0401111	4.06492	up
MSTRG.34483.1	0	0	0	0.081467	0.073037	0.145	0.0401111	4.06492	up
MSTRG.29740.1	0	0	0	0.173856	0.030032	0.235046	0.0403857	4.29678	up
MSTRG.36465.1	0	0	0	0.117698	0.038919	0.242749	0.0410448	4.34433	up
MSTRG.21124.1	0	0	0	0.064911	0.051324	0.115506	0.0452578	4.09095	up
