# Supplementary material for: Research on lncRNA related to drought resistance of Shanlan upland rice
Source: BMC Genomics. 2022 Apr 30;23:336. doi: 10.1186/s12864-022-08546-0 (PMC9055766; doi:10.1186/s12864-022-08546-0)
Supplement: Supplementary file 2 — Additional file 2: Table S002. lncRNA specifically expressed in CK. [file 12864_2022_8546_MOESM2_ESM.xlsx]

## Sheet: Sheet1
Table S002. lncRNA specifically expressed in CK
#ID	CK1_FPKM	CK2_FPKM	CK3_FPKM	D1_FPKM	D2_FPKM	D3_FPKM	Pvalue	log2FC	regulated
MSTRG.18092.1	0.44544	0.149439	0.073029	0	0	0	1.82225e-06	-8.21935	down
MSTRG.40822.2	0.470162	0.792476	0.421116	0	0	0	4.13381e-06	-7.17039	down
MSTRG.27106.6	0.090113	0.152497	0.044984	0	0	0	6.9725e-06	-7.25569	down
MSTRG.28732.3	0.284954	0.234933	0.00344	0	0	0	0.000619538	-6.91022	down
MSTRG.5338.1	0.437985	0.337398	0.276495	0	0	0	0.00071358	-5.69267	down
MSTRG.29366.1	0.117769	0.023721	0.172974	0	0	0	0.00173548	-5.93434	down
MSTRG.38893.2	0.07608	0.118775	0.057076	0	0	0	0.010348	-4.75524	down
MSTRG.16393.1	0.1288	0.292282	0.128002	0	0	0	0.0116372	-4.75765	down
MSTRG.19045.1	0.504569	0.092679	0.053702	0	0	0	0.01276	-5.03703	down
MSTRG.7719.1	0.167108	0.12714	0.064669	0	0	0	0.0162451	-4.61155	down
