# Supplementary material for: Research on lncRNA related to drought resistance of Shanlan upland rice
Source: BMC Genomics. 2022 Apr 30;23:336. doi: 10.1186/s12864-022-08546-0 (PMC9055766; doi:10.1186/s12864-022-08546-0)
Supplement: Supplementary file 3 — Additional file 3: Table S003. The primers used for qRT-PCR. [file 12864_2022_8546_MOESM3_ESM.xlsx]

## Sheet: Sheet1
Table S003. The primers used for qRT-PCR
Name of primer	Primer sequence(5'-3')
MSTRG.28732.3-F	ATATGAAGAAAGGAGCGATGGAG
MSTRG.28732.3-R	CAACTAGACTTGATAGGTTACGGA
miR171-Stem loop RT-PCR	GTCGTATCCAGTGCAGGGTCCGAGGTATTCGCACTGGATACGACGTTTGG
miR171-F	GCGCGCGGAGAGCCGG
Os12g0270300-F	AAGGACTCGGGAGCAATGGA
Os12g0270300-R	CCACCTTCCACGCACCTATG
Os02g0662700-F	TGTCCTAAGGTTGTCGTGGC
Os02g0662700-R	GCGAGTCAAGGAGGAACACA
Os02g0663100-F	AGTTTGCAAACTTCACGGCAA
Os02g0663100-R	CGACACGAAAGCTGTTAGCTT
Os06g0105350-F	TCAATCATCGCCTCCCCTC
Os06g0105350-R	TGTGAAGGTGGTGAACTGCA
β-actin-F	TTGTGTTGGACTCTGGTGATG
β-actin-R	AAGCTCGTAGCTCTTCTCCAC
U6-F	CGATAAAATTGGAACGATACAGA
U6-R	ATTTGGACCATTTCTCGATTTGT
