# Supplementary material for: Research on lncRNA related to drought resistance of Shanlan upland rice
Source: BMC Genomics. 2022 Apr 30;23:336. doi: 10.1186/s12864-022-08546-0 (PMC9055766; doi:10.1186/s12864-022-08546-0)
Supplement: Supplementary file 4 — Additional file 4: Table S004. List of differentially expressed lncRNAs from the two treatment groups. [file 12864_2022_8546_MOESM4_ESM.xlsx]

## Sheet: sheet1
Table S004. List of differentially expressed lncRNAs from the two treatment groups
#ID	cis-target	trans-target	Pvalue	log2FC	regulated
MSTRG.10144.1	Os11g0447300;Os11g0446500;Os11g0446000	BAC19898;Os01g0103100;Os01g0108500;Os01g0121500;Os01g0128200;Os01g0136000;Os01g0138232;Os01g0139200;Os01g0144600;Os01g0148200;Os01g0150950;Os01g0152100;Os01g0154600;Os01g0155600;Os01g0158800;Os01g0159000;Os01g0159500;Os01g0159800;Os01g0166400;Os01g0168850;Os01g0174300;Os01g0176300;Os01g0176900;Os01g0183500;Os01g0191100;Os01g0191500;Os01g0192000;Os01g0192101;Os01g0198000;Os01g0205300;Os01g0205500;…	0.0069977	4.47364	up
MSTRG.10223.1	Os11g0462500;Os11g0462950;Os11g0462100;Os11g0462900;Os11g0462850;Os11g0460500;Os11g0461200;Os11g0460800;Os11g0460900;Os11g0460700	BAC19868;BAC19872;BAC19873;BAC19902;CAA33920;CAA33927;CAA33941;CAA33951;Os01g0100300;Os01g0100466;Os01g0100900;Os01g0101900;Os01g0102000;Os01g0103900;Os01g0104500;Os01g0106900;Os01g0107750;Os01g0107900;Os01g0108000;Os01g0108400;Os01g0108700;Os01g0109366;Os01g0109700;Os01g0110400;Os01g0110600;Os01g0111000;Os01g0111200;Os01g0112000;Os01g0113200;Os01g0113300;Os01g0113325;Os01g0113400;Os01g0113450;Os…	0.0117221	5.34417	up
MSTRG.11355.1	Os11g0685400;Os11g0685300;Os11g0684400;Os11g0681300;Os11g0683600;Os11g0683800;Os11g0682501;Os11g0683500;Os11g0682000;Os11g0684000;Os11g0685500;Os11g0685100;Os11g0681400;Os11g0682600;Os11g0685200;Os11g0682300;Os11g0685600;Os11g0685700;Os11g0684700;Os11g0684100;Os11g0680800;Os11g0683700	BAC19902;CAA33908;CAA33920;CAA33941;CAA33961;Os01g0100466;Os01g0100900;Os01g0101850;Os01g0102000;Os01g0103900;Os01g0104500;Os01g0106900;Os01g0107900;Os01g0108000;Os01g0109700;Os01g0110200;Os01g0110400;Os01g0110600;Os01g0111200;Os01g0111500;Os01g0112500;Os01g0113300;Os01g0113400;Os01g0114600;Os01g0116250;Os01g0117000;Os01g0117100;Os01g0118000;Os01g0120600;Os01g0120700;Os01g0121600;Os01g0121800;Os0…	0.00592013	3.90914	up
MSTRG.11548.1	Os12g0106700;Os12g0105150;Os12g0104250;Os12g0105500;Os12g0106300;Os12g0106525;Os12g0106500;Os12g0105800;Os12g0105962;Os12g0106801;Os12g0104300;Os12g0105700;Os12g0104200;Os12g0106100;Os12g0105401;Os12g0105600;Os12g0106600;Os12g0105200;Os12g0105975;Os12g0104900;Os12g0106200;Os12g0105300;Os12g0105850;Os12g0106000;Os12g0105950;Os12g0104800;Os12g0106550;Os12g0104766;Os12g0104733;Os12g0104700;Os12g0106…	BAC19898;CAA33938;CAA33956;Os01g0100466;Os01g0102500;Os01g0105800;Os01g0106800;Os01g0110200;Os01g0112500;Os01g0114600;Os01g0115100;Os01g0117100;Os01g0120600;Os01g0121800;Os01g0126401;Os01g0127300;Os01g0128200;Os01g0128250;Os01g0128400;Os01g0131450;Os01g0131600;Os01g0134900;Os01g0139200;Os01g0150950;Os01g0151600;Os01g0154600;Os01g0155600;Os01g0158800;Os01g0159000;Os01g0159400;Os01g0162200;Os01g016…	0.0482051	-1.54401	down
MSTRG.11979.3	Os12g0156400;Os12g0158400;Os12g0157200;Os12g0157000;Os12g0156500;Os12g0157066;Os12g0156866;Os12g0156000;Os12g0156883;Os12g0158300;Os12g0156200;Os12g0157400;Os12g0155400;Os12g0157700;Os12g0156100	BAC19875;CAA34005;Os01g0100700;Os01g0103075;Os01g0103100;Os01g0106400;Os01g0120800;Os01g0127400;Os01g0136000;Os01g0138232;Os01g0143350;Os01g0144600;Os01g0157600;Os01g0159000;Os01g0159800;Os01g0164500;Os01g0166300;Os01g0166400;Os01g0167800;Os01g0168600;Os01g0168850;Os01g0171800;Os01g0173100;Os01g0178200;Os01g0183500;Os01g0191100;Os01g0192000;Os01g0192101;Os01g0192300;Os01g0195200;Os01g0200300;Os01…	0.000139683	4.19642	up
MSTRG.12273.1	Os12g0209100;Os12g0207600;Os12g0207300;Os12g0207500;Os12g0208950;Os12g0209000;Os12g0206700;Os12g0207200;Os12g0209200;Os12g0205500;Os12g0205633;Os12g0206800;Os12g0208900;Os12g0207000	Os01g0100466;Os01g0103650;Os01g0105800;Os01g0110200;Os01g0114600;Os01g0115100;Os01g0133500;Os01g0134900;Os01g0136850;Os01g0137950;Os01g0139200;Os01g0149350;Os01g0151600;Os01g0155600;Os01g0159400;Os01g0164400;Os01g0168100;Os01g0175700;Os01g0176300;Os01g0176700;Os01g0177200;Os01g0177900;Os01g0179300;Os01g0180600;Os01g0180700;Os01g0180850;Os01g0182200;Os01g0183000;Os01g0183300;Os01g0183633;Os01g0189…	0.00995428	4.79025	up
MSTRG.12406.2	Os12g0229600;Os12g0226400;Os12g0227766;Os12g0225700;Os12g0225900;Os12g0227500;Os12g0229100;Os12g0227050;Os12g0228800;Os12g0228900;Os12g0227400;Os12g0226500;Os12g0226700;Os12g0228650;Os12g0228700;Os12g0226900	CAA33986;CAA33987;Os01g0100700;Os01g0103000;Os01g0104800;Os01g0106400;Os01g0106500;Os01g0108200;Os01g0109201;Os01g0112100;Os01g0112600;Os01g0112800;Os01g0113150;Os01g0120800;Os01g0123500;Os01g0127400;Os01g0129600;Os01g0138100;Os01g0143300;Os01g0143350;Os01g0147700;Os01g0152951;Os01g0153550;Os01g0153950;Os01g0159200;Os01g0162300;Os01g0164500;Os01g0167600;Os01g0168300;Os01g0168800;Os01g0171800;Os01…	0.0378053	2.20091	up
MSTRG.12865.1	Os12g0406000;Os12g0407100;Os12g0405700;Os12g0405400;Os12g0405100;Os12g0406333;Os12g0406200;Os12g0405200;Os12g0406100;Os12g0407200;Os12g0407300;Os12g0406732;Os12g0407000	CAA33959;CAA33973;CAA33991;Os01g0100650;Os01g0102850;Os01g0105900;Os01g0127450;Os01g0147900;Os01g0191200;Os01g0221900;Os01g0237000;Os01g0238500;Os01g0259900;Os01g0284700;Os01g0343500;Os01g0346250;Os01g0371400;Os01g0387133;Os01g0514700;Os03g0279400;Os03g0281900;Os03g0294700;Os03g0312600;Os03g0313300;Os03g0342900;Os03g0355300;Os03g0390700;Os03g0392400;Os03g0401333;Os03g0415500;Os03g0415750;Os03g042…	0.000155659	6.17385	up
MSTRG.13026.1	Os12g0435000;Os12g0435100;Os12g0435200	Os01g0100466;Os01g0101850;Os01g0102000;Os01g0104500;Os01g0106900;Os01g0107900;Os01g0109700;Os01g0110200;Os01g0110400;Os01g0111500;Os01g0112500;Os01g0114600;Os01g0115100;Os01g0117000;Os01g0117100;Os01g0118000;Os01g0120600;Os01g0121600;Os01g0121800;Os01g0124000;Os01g0124600;Os01g0125800;Os01g0125850;Os01g0125900;Os01g0127100;Os01g0128250;Os01g0128400;Os01g0130500;Os01g0133500;Os01g0134900;Os01g0135…	0.0254432	3.89898	up
MSTRG.13081.1	Os12g0450300;Os12g0448900;Os12g0448650;Os12g0450500	Os01g0113350;Os01g0153300;Os01g0155000;Os01g0155500;Os01g0175600;Os01g0179600;Os01g0180400;Os01g0201250;Os01g0210800;Os01g0215500;Os01g0216300;Os01g0220200;Os01g0221400;Os01g0227300;Os01g0227500;Os01g0236300;Os01g0267800;Os01g0274100;Os01g0327500;Os01g0347000;Os01g0505500;Os03g0275950;Os03g0279200;Os03g0293500;Os03g0295300;Os03g0297600;Os03g0302500;Os03g0310701;Os03g0337550;Os03g0342100;Os03g0364…	0.0306245	-2.46175	down
MSTRG.13082.1	Os12g0450300;Os12g0451300;Os12g0448900;Os12g0450500	CAA33938;CAA33956;Os01g0105800;Os01g0113350;Os01g0115100;Os01g0127300;Os01g0128800;Os01g0137950;Os01g0138000;Os01g0154600;Os01g0155600;Os01g0159000;Os01g0159400;Os01g0162200;Os01g0168100;Os01g0174300;Os01g0175700;Os01g0176300;Os01g0176700;Os01g0180300;Os01g0183633;Os01g0189800;Os01g0191500;Os01g0192101;Os01g0192300;Os01g0194600;Os01g0205200;Os01g0205500;Os01g0210200;Os01g0222600;Os01g0223200;Os01…	0.0393997	4.00998	up
MSTRG.13114.1	Os12g0456700;Os12g0456100;Os12g0457500;Os12g0456400;Os12g0456000;Os12g0456200;Os12g0457200;Os12g0456300;Os12g0458100	BAC19898;CAA33938;CAA33956;CAA34006;Os01g0100466;Os01g0102500;Os01g0105800;Os01g0110200;Os01g0112500;Os01g0114600;Os01g0115100;Os01g0127300;Os01g0128200;Os01g0128250;Os01g0128400;Os01g0131450;Os01g0134900;Os01g0137950;Os01g0138000;Os01g0139200;Os01g0149350;Os01g0151600;Os01g0154600;Os01g0155600;Os01g0158800;Os01g0159000;Os01g0159400;Os01g0162200;Os01g0168100;Os01g0174300;Os01g0175700;Os01g0176300…	0.0338302	1.46712	up
MSTRG.13128.1	Os12g0461050;Os12g0460100;Os12g0460800;Os12g0461300;Os12g0460400	BAC19868;BAC19872;BAC19873;BAC19902;CAA33920;CAA33927;CAA33941;CAA33951;Os01g0100300;Os01g0100900;Os01g0101900;Os01g0102000;Os01g0103900;Os01g0107750;Os01g0107900;Os01g0108000;Os01g0108400;Os01g0108700;Os01g0109366;Os01g0109700;Os01g0110400;Os01g0110600;Os01g0111000;Os01g0111200;Os01g0112000;Os01g0113200;Os01g0113300;Os01g0113325;Os01g0113400;Os01g0113450;Os01g0113500;Os01g0113650;Os01g0113700;Os…	0.0182905	3.17559	up
MSTRG.13190.1	Os12g0472300;Os12g0470700;Os12g0471100;Os12g0472366;Os12g0470000;Os12g0472500	CAA33908;CAA33920;CAA33941;Os01g0100466;Os01g0101850;Os01g0102000;Os01g0104500;Os01g0106900;Os01g0107900;Os01g0108000;Os01g0109700;Os01g0110200;Os01g0110400;Os01g0111200;Os01g0111500;Os01g0112500;Os01g0113400;Os01g0114600;Os01g0117000;Os01g0117100;Os01g0118000;Os01g0120600;Os01g0121600;Os01g0121800;Os01g0122534;Os01g0124000;Os01g0124600;Os01g0125800;Os01g0125850;Os01g0125900;Os01g0127100;Os01g012…	0.000400009	4.26854	up
MSTRG.14175.5	Os12g0621400;Os12g0619100;Os12g0619700;Os12g0620600;Os12g0621000;Os12g0620733;Os12g0621500;Os12g0621300;Os12g0621100;Os12g0621832;Os12g0621700;Os12g0619000;Os12g0621600;Os12g0620000;Os12g0620400;Os12g0621025;Os12g0621766;Os12g0618800;Os12g0620100	CAA33924;CAA33973;Os01g0100650;Os01g0102850;Os01g0127450;Os01g0202800;Os01g0218500;Os01g0221900;Os01g0229400;Os01g0234001;Os01g0263400;Os01g0286550;Os01g0343500;Os01g0371400;Os01g0508500;Os01g0510600;Os01g0530366;Os03g0281900;Os03g0302000;Os03g0332533;Os03g0355300;Os03g0371400;Os03g0385100;Os03g0390700;Os03g0392400;Os03g0411800;Os03g0415351;Os03g0415750;Os03g0435800;Os03g0439900;Os03g0601000;Os03…	0.0293953	4.11206	up
MSTRG.1418.1	Os01g0271000;Os01g0269800;Os01g0269500;Os01g0273200;Os01g0270501;Os01g0272700;Os01g0273100;Os01g0270700;Os01g0272600;Os01g0272901;Os01g0271700;Os01g0273300;Os01g0272800;Os01g0269900;Os01g0270100;Os01g0273500;Os01g0272850;Os01g0269950;Os01g0271200;Os01g0273000;Os01g0270300;Os01g0272650;Os01g0271500;Os01g0269550;Os01g0273150	Os01g0100466;Os01g0101850;Os01g0102000;Os01g0103650;Os01g0104500;Os01g0106900;Os01g0107900;Os01g0109700;Os01g0110200;Os01g0110400;Os01g0112500;Os01g0114600;Os01g0115100;Os01g0117100;Os01g0118000;Os01g0120600;Os01g0121600;Os01g0121800;Os01g0124600;Os01g0125800;Os01g0125850;Os01g0125900;Os01g0128250;Os01g0128400;Os01g0130500;Os01g0133500;Os01g0134900;Os01g0135800;Os01g0136850;Os01g0137950;Os01g0139…	0.00366496	5.3254	up
MSTRG.1435.4	Os01g0273500;Os01g0273850;Os01g0274500;Os01g0272850;Os01g0273150;Os01g0273900;Os01g0272650;Os01g0273000;Os01g0274100;Os01g0273100;Os01g0272700;Os01g0271700;Os01g0272600;Os01g0274800;Os01g0272901;Os01g0274300;Os01g0274601;Os01g0274201;Os01g0273200;Os01g0273300;Os01g0272800	Os01g0115566;Os01g0115600;Os01g0117700;Os01g0175600;Os01g0180400;Os01g0182200;Os01g0225300;Os01g0226600;Os01g0236300;Os01g0274100;Os01g0281050;Os01g0347000;Os01g0357150;Os01g0528800;Os03g0279200;Os03g0292600;Os03g0293450;Os03g0337550;Os03g0337600;Os03g0366200;Os03g0387900;Os03g0388300;Os03g0571800;Os03g0594250;Os03g0728900;Os03g0776100;Os03g0817100;Os04g0227200;Os04g0288500;Os04g0314201;Os04g0349…	0.042741	-2.46355	down
MSTRG.14440.1	Os02g0110500;Os02g0112900;Os02g0110200;Os02g0110650;Os02g0110300;Os02g0112100;Os02g0110400;Os02g0111800;Os02g0110600;Os02g0112600;Os02g0110101;Os02g0110700;Os02g0109800;Os02g0109400;Os02g0111900;Os02g0111500;Os02g0112000;Os02g0109501;Os02g0110000;Os02g0111700;Os02g0109200;Os02g0109900;Os02g0111600	CAA33958;Os01g0101850;Os01g0104500;Os01g0108500;Os01g0111500;Os01g0117100;Os01g0120600;Os01g0121500;Os01g0121950;Os01g0122367;Os01g0122534;Os01g0128200;Os01g0128250;Os01g0139200;Os01g0147800;Os01g0148200;Os01g0150500;Os01g0150950;Os01g0151600;Os01g0152200;Os01g0153600;Os01g0154600;Os01g0155300;Os01g0155600;Os01g0158800;Os01g0159500;Os01g0176300;Os01g0176800;Os01g0176900;Os01g0177200;Os01g0189700;…	0.034888	4.37828	up
MSTRG.14441.1	Os02g0111700;Os02g0110000;Os02g0111600;Os02g0109900;Os02g0111500;Os02g0111900;Os02g0112000;Os02g0110600;Os02g0112600;Os02g0110101;Os02g0110700;Os02g0111800;Os02g0110400;Os02g0112100;Os02g0109800;Os02g0110900;Os02g0110500;Os02g0113200;Os02g0110300;Os02g0110200;Os02g0110650;Os02g0112900	Os01g0108800;Os01g0113350;Os01g0132100;Os01g0136850;Os01g0138000;Os01g0149350;Os01g0179600;Os01g0189800;Os01g0194600;Os01g0209800;Os01g0209901;Os01g0221400;Os01g0222600;Os01g0259200;Os01g0299700;Os01g0326000;Os01g0327500;Os01g0357100;Os01g0367700;Os01g0379101;Os01g0383700;Os01g0384300;Os01g0391600;Os01g0506100;Os01g0520340;Os01g0520600;Os01g0527900;Os03g0285900;Os03g0294800;Os03g0295300;Os03g0297…	0.000217063	-2.80498	down
MSTRG.14441.2	Os02g0110000;Os02g0111700;Os02g0111600;Os02g0109900;Os02g0111500;Os02g0111900;Os02g0112000;Os02g0110600;Os02g0112600;Os02g0110101;Os02g0110700;Os02g0111800;Os02g0110400;Os02g0112100;Os02g0109800;Os02g0110900;Os02g0110500;Os02g0110300;Os02g0113200;Os02g0110200;Os02g0110650;Os02g0112900	BAC19887;Os01g0113350;Os01g0138000;Os01g0139700;Os01g0155000;Os01g0155500;Os01g0179600;Os01g0187350;Os01g0201250;Os01g0202500;Os01g0207500;Os01g0209800;Os01g0210800;Os01g0220200;Os01g0227300;Os01g0227500;Os01g0234300;Os01g0235632;Os01g0259200;Os01g0267800;Os01g0299700;Os01g0317500;Os01g0327500;Os01g0337600;Os01g0347000;Os01g0348600;Os01g0352200;Os01g0355800;Os01g0357100;Os01g0367700;Os01g0383700;…	0.049868	-1.40174	down
MSTRG.14982.1	Os02g0176000;Os02g0174250;Os02g0175750;Os02g0173700;Os02g0175600;Os02g0174900;Os02g0174300;Os02g0173800;Os02g0173401;Os02g0173300;Os02g0172850;Os02g0174400;Os02g0175301;Os02g0175200;Os02g0173600;Os02g0175700;Os02g0173650;Os02g0175900;Os02g0174500;Os02g0175800;Os02g0175250;Os02g0175400;Os02g0173200;Os02g0174800;Os02g0172800;Os02g0175100;Os02g0173100;Os02g0175500;Os02g0173000;Os02g0173500;Os02g0174…	BAC19868;BAC19872;BAC19873;BAC19902;CAA33920;CAA33927;CAA33928;CAA33941;CAA33951;Os01g0100300;Os01g0100900;Os01g0101900;Os01g0102000;Os01g0103900;Os01g0107750;Os01g0107900;Os01g0108000;Os01g0108400;Os01g0108700;Os01g0109366;Os01g0109700;Os01g0110400;Os01g0110600;Os01g0111000;Os01g0111200;Os01g0112000;Os01g0113200;Os01g0113300;Os01g0113325;Os01g0113400;Os01g0113450;Os01g0113500;Os01g0113650;Os01g0…	0.000665208	5.53721	up
MSTRG.15053.11	Os02g0180100;Os02g0180400;Os02g0181400;Os02g0182100;Os02g0180900;Os02g0182300;Os02g0179800;Os02g0181300;Os02g0182500;Os02g0180500;Os02g0180200;Os02g0181200;Os02g0181800;Os02g0179500;Os02g0182200;Os02g0179900;Os02g0181700;Os02g0182600;Os02g0180700;Os02g0181900;Os02g0179600;Os02g0179300;Os02g0179950;Os02g0180000;Os02g0179400	CAA33986;CAA33987;Os01g0100700;Os01g0103000;Os01g0104800;Os01g0106400;Os01g0108200;Os01g0109201;Os01g0112100;Os01g0112600;Os01g0112800;Os01g0113150;Os01g0120800;Os01g0123500;Os01g0127000;Os01g0127400;Os01g0129600;Os01g0136100;Os01g0138100;Os01g0143300;Os01g0143350;Os01g0147700;Os01g0152951;Os01g0153550;Os01g0153950;Os01g0157600;Os01g0159200;Os01g0162300;Os01g0164500;Os01g0166400;Os01g0167600;Os01…	0.0464086	2.48176	up
MSTRG.15410.1	Os02g0223850;Os02g0224400;Os02g0225000;Os02g0226300;Os02g0226200;Os02g0225100;Os02g0225900;Os02g0223700;Os02g0224800;Os02g0224200;Os02g0226700;Os02g0224100;Os02g0226600;Os02g0226400;Os02g0226000;Os02g0225300;Os02g0224300	BAC19868;BAC19872;BAC19873;BAC19902;CAA33920;CAA33927;CAA33941;CAA33951;Os01g0100300;Os01g0100466;Os01g0100900;Os01g0101900;Os01g0102000;Os01g0103900;Os01g0107750;Os01g0107900;Os01g0108000;Os01g0108400;Os01g0108700;Os01g0109366;Os01g0109700;Os01g0110400;Os01g0110600;Os01g0111000;Os01g0111200;Os01g0112000;Os01g0113200;Os01g0113300;Os01g0113325;Os01g0113400;Os01g0113450;Os01g0113500;Os01g0113650;Os…	0.0171731	5.16467	up
MSTRG.15467.2	Os02g0230875;Os02g0231700;Os02g0232000;Os02g0231000;Os02g0232900;Os02g0232100;Os02g0231850;Os02g0232300;Os02g0231600;Os02g0232500;Os02g0232050;Os02g0233200;Os02g0233100;Os02g0232400	CAA33917;Os01g0108800;Os01g0115200;Os01g0126000;Os01g0141000;Os01g0150200;Os01g0155000;Os01g0208600;Os01g0209800;Os01g0209901;Os01g0330650;Os01g0379101;Os01g0384300;Os01g0520600;Os01g0527900;Os03g0294800;Os03g0297600;Os03g0302500;Os03g0305800;Os03g0333200;Os03g0337700;Os03g0341600;Os03g0436300;Os03g0587100;Os03g0598002;Os03g0609500;Os03g0624600;Os03g0682100;Os03g0705800;Os03g0752300;Os03g0755100;…	0.000422735	-4.21328	down
MSTRG.15519.1	Os02g0240300;Os02g0241650;Os02g0242900;Os02g0242100;Os02g0241200;Os02g0240100;Os02g0242600;Os02g0242550;Os02g0241600;Os02g0241100;Os02g0241300	BAC19868;BAC19872;BAC19873;BAC19902;CAA33920;CAA33927;CAA33941;CAA33951;Os01g0100300;Os01g0100466;Os01g0100900;Os01g0101850;Os01g0101900;Os01g0102000;Os01g0103900;Os01g0104500;Os01g0104600;Os01g0106900;Os01g0107750;Os01g0107900;Os01g0108000;Os01g0108400;Os01g0108700;Os01g0109366;Os01g0109700;Os01g0110200;Os01g0110400;Os01g0110600;Os01g0111000;Os01g0111200;Os01g0112000;Os01g0113200;Os01g0113300;Os…	0.0305714	4.72385	up
MSTRG.15764.5	Os02g0282301;Os02g0281200;Os02g0282000;Os02g0282500;Os02g0281150;Os02g0282900;Os02g0281000;Os02g0282600;Os02g0281101;Os02g0282100	Os01g0100700;Os01g0106400;Os01g0112100;Os01g0112600;Os01g0112800;Os01g0113150;Os01g0127000;Os01g0136100;Os01g0143300;Os01g0147700;Os01g0152951;Os01g0153550;Os01g0153950;Os01g0154250;Os01g0157600;Os01g0159200;Os01g0162300;Os01g0167600;Os01g0168800;Os01g0172800;Os01g0176400;Os01g0181300;Os01g0184000;Os01g0184500;Os01g0185000;Os01g0189100;Os01g0200300;Os01g0200350;Os01g0206200;Os01g0207900;Os01g0208…	0.0198722	5.4261	up
MSTRG.15985.2	Os02g0322251;Os02g0321600;Os02g0324200;Os02g0321900;Os02g0324700;Os02g0322400;Os02g0324300;Os02g0323600;Os02g0324400;Os02g0323000;Os02g0321500;Os02g0323300;Os02g0321800;Os02g0324500	Os01g0108800;Os01g0150200;Os01g0154100;Os01g0155000;Os01g0180400;Os01g0201250;Os01g0210800;Os01g0215500;Os01g0227300;Os01g0346700;Os01g0347000;Os03g0292200;Os03g0302500;Os03g0303100;Os03g0342100;Os03g0399400;Os03g0587100;Os03g0598002;Os03g0634400;Os03g0687700;Os03g0705800;Os03g0725050;Os03g0752300;Os03g0755100;Os03g0755900;Os03g0760100;Os03g0762800;Os03g0783725;Os03g0824000;Os03g0837700;Os03g0857…	0.0343524	-3.31403	down
MSTRG.16393.1	Os02g0501350;Os02g0499300;Os02g0499575;Os02g0502500;Os02g0500250;Os02g0502300;Os02g0500700	Os01g0115566;Os01g0128800;Os01g0137950;Os01g0153300;Os01g0175600;Os01g0175633;Os01g0179600;Os01g0180400;Os01g0201200;Os01g0216300;Os01g0216400;Os01g0220200;Os01g0221400;Os01g0223000;Os01g0225300;Os01g0236300;Os01g0274100;Os01g0281000;Os01g0281050;Os01g0297200;Os01g0321900;Os01g0347000;Os01g0357150;Os01g0510701;Os01g0528800;Os03g0279200;Os03g0292600;Os03g0295300;Os03g0310701;Os03g0337550;Os03g0375…	0.0116372	-4.75765	down
MSTRG.17336.1	Os02g0625100;Os02g0627100;Os02g0627750;Os02g0626532;Os02g0626600;Os02g0624400;Os02g0624700;Os02g0625000;Os02g0627800;Os02g0625300;Os02g0626100;Os02g0625900;Os02g0626400;Os02g0625500;Os02g0627700	BAC19865;BAC19868;BAC19872;BAC19873;BAC19902;CAA33920;CAA33927;CAA33928;CAA33941;CAA33951;Os01g0100300;Os01g0100900;Os01g0101900;Os01g0102000;Os01g0103900;Os01g0107750;Os01g0107900;Os01g0108000;Os01g0108400;Os01g0108700;Os01g0109366;Os01g0109700;Os01g0110400;Os01g0110500;Os01g0110600;Os01g0111000;Os01g0111200;Os01g0112000;Os01g0113200;Os01g0113300;Os01g0113325;Os01g0113400;Os01g0113450;Os01g01135…	0.0131158	5.10859	up
MSTRG.17830.1	Os02g0689550;Os02g0688900;Os02g0690550;Os02g0689800;Os02g0688500;Os02g0689600;Os02g0689066;Os02g0691650;Os02g0687900;Os02g0689900;Os02g0688000;Os02g0689200;Os02g0689132;Os02g0689000;Os02g0690800;Os02g0690700;Os02g0689700;Os02g0688200;Os02g0690200;Os02g0690500;Os02g0691500;Os02g0690000;Os02g0689500;Os02g0690600	BAC19868;BAC19872;BAC19873;BAC19902;CAA33920;CAA33927;CAA33928;CAA33941;CAA33951;Os01g0100300;Os01g0100466;Os01g0100900;Os01g0101850;Os01g0101900;Os01g0102000;Os01g0103900;Os01g0104500;Os01g0107750;Os01g0107900;Os01g0108000;Os01g0108400;Os01g0108700;Os01g0109366;Os01g0109700;Os01g0110400;Os01g0110500;Os01g0110600;Os01g0111000;Os01g0111200;Os01g0112000;Os01g0113200;Os01g0113300;Os01g0113325;Os01g0…	0.0218861	5.5462	up
MSTRG.1786.1	Os01g0327250;Os01g0328300;Os01g0329400;Os01g0328900;Os01g0328500;Os01g0328400;Os01g0329350;Os01g0328600;Os01g0327900;Os01g0329075;Os01g0329000;Os01g0327000;Os01g0329900;Os01g0327600;Os01g0327100;Os01g0329800;Os01g0328700;Os01g0327400;Os01g0327500;Os01g0329300	BAC19875;CAA33913;CAA33947;Os01g0103075;Os01g0103100;Os01g0120800;Os01g0127400;Os01g0128800;Os01g0136000;Os01g0138000;Os01g0144600;Os01g0151900;Os01g0159000;Os01g0159800;Os01g0164500;Os01g0166300;Os01g0166400;Os01g0167800;Os01g0168600;Os01g0168850;Os01g0178200;Os01g0180300;Os01g0191100;Os01g0192000;Os01g0192101;Os01g0192300;Os01g0194600;Os01g0195200;Os01g0200300;Os01g0200350;Os01g0200600;Os01g020…	0.037249	1.50494	up
MSTRG.17911.1	Os02g0699800;Os02g0697700;Os02g0699836;Os02g0700500;Os02g0697400;Os02g0700100;Os02g0700600;Os02g0700700;Os02g0699466;Os02g0698000;Os02g0697550;Os02g0699000;Os02g0699600;Os02g0697500;Os02g0700000;Os02g0697600;Os02g0700400;Os02g0699433;Os02g0699824;Os02g0697650;Os02g0698100;Os02g0697900;Os02g0699700;Os02g0697450;Os02g0701300;Os02g0699150;Os02g0700901;Os02g0697800;Os02g0699400;Os02g0700300;Os02g0699…	Os01g0103650;Os01g0105800;Os01g0117025;Os01g0137950;Os01g0162500;Os01g0167400;Os01g0168100;Os01g0175700;Os01g0175733;Os01g0182200;Os01g0186400;Os01g0194600;Os01g0222500;Os01g0222600;Os01g0239150;Os01g0251000;Os01g0252100;Os01g0274100;Os01g0277100;Os01g0315600;Os01g0337160;Os01g0357400;Os01g0387133;Os01g0391600;Os01g0506100;Os01g0507000;Os01g0520340;Os01g0528800;Os01g0531500;Os03g0292600;Os03g0292…	0.009521	3.96008	up
MSTRG.18092.1	Os02g0724000;Os02g0723200;Os02g0721000;Os02g0723400;Os02g0721100;Os02g0721700;Os02g0721800;Os02g0722500;Os02g0721901;Os02g0724100;Os02g0722450;Os02g0723700;Os02g0724450;Os02g0721200;Os02g0722400;Os02g0722350;Os02g0722700;Os02g0722300;Os02g0723300;Os02g0720900;Os02g0723600;Os02g0721600;Os02g0722001;Os02g0722800	BAC19864;CAA33917;Os01g0108800;Os01g0115200;Os01g0126000;Os01g0130200;Os01g0140700;Os01g0179500;Os01g0192600;Os01g0201700;Os01g0208600;Os01g0209800;Os01g0223900;Os01g0248701;Os01g0249100;Os01g0261700;Os01g0270300;Os01g0273200;Os01g0287400;Os01g0296700;Os01g0300900;Os01g0312500;Os01g0313300;Os01g0330650;Os01g0384300;Os01g0520600;Os01g0524500;Os01g0525701;Os01g0527900;Os03g0304500;Os03g0305800;Os03…	1.82225e-06	-8.21935	down
MSTRG.18179.3	Os02g0730775;Os02g0730450;Os02g0732600;Os02g0730800;Os02g0731600;Os02g0730050;Os02g0730400;Os02g0732500;Os02g0730725;Os02g0730900;Os02g0730075;Os02g0730751;Os02g0731400;Os02g0729700;Os02g0732700;Os02g0732400;Os02g0731500;Os02g0729500;Os02g0729801;Os02g0730100;Os02g0732250;Os02g0732900;Os02g0731900;Os02g0732800;Os02g0729400;Os02g0731700;Os02g0730300;Os02g0730600;Os02g0733001;Os02g0730500;Os02g0732…	CAA33958;Os01g0101850;Os01g0104500;Os01g0108500;Os01g0110200;Os01g0111500;Os01g0117100;Os01g0120600;Os01g0121500;Os01g0121950;Os01g0122367;Os01g0122534;Os01g0128200;Os01g0128250;Os01g0134900;Os01g0139200;Os01g0148050;Os01g0148200;Os01g0150500;Os01g0150950;Os01g0151600;Os01g0152200;Os01g0153600;Os01g0154600;Os01g0155600;Os01g0158800;Os01g0159500;Os01g0162900;Os01g0176300;Os01g0176800;Os01g0176900;…	0.021307	5.33337	up
MSTRG.18203.1	Os02g0733500;Os02g0731800;Os02g0733200;Os02g0734500;Os02g0732400;Os02g0732700;Os02g0732350;Os02g0734300;Os02g0732200;Os02g0732300;Os02g0733300;Os02g0734400;Os02g0733001;Os02g0732500;Os02g0733800;Os02g0731700;Os02g0731600;Os02g0732800;Os02g0733400;Os02g0733900;Os02g0731900;Os02g0734600;Os02g0732600;Os02g0732250;Os02g0732900;Os02g0734900;Os02g0733166;Os02g0734101;Os02g0734800	BAC19868;BAC19872;BAC19873;BAC19902;CAA33920;CAA33927;CAA33928;CAA33941;CAA33951;Os01g0100300;Os01g0100900;Os01g0101900;Os01g0102000;Os01g0103900;Os01g0107750;Os01g0107900;Os01g0108000;Os01g0108400;Os01g0108700;Os01g0109366;Os01g0110400;Os01g0110600;Os01g0111000;Os01g0111200;Os01g0112000;Os01g0113200;Os01g0113300;Os01g0113325;Os01g0113400;Os01g0113450;Os01g0113500;Os01g0113650;Os01g0113700;Os01g0…	0.00745945	5.84739	up
MSTRG.18576.1	Os02g0773500;Os02g0773732;Os02g0776600;Os02g0774500;Os02g0775100;Os02g0774300;Os02g0775200;Os02g0775900;Os02g0773200;Os02g0773700;Os02g0775600;Os02g0773450;Os02g0774200;Os02g0775050;Os02g0774100;Os02g0776400;Os02g0774800;Os02g0774700;Os02g0773300;Os02g0773400;Os02g0775300;Os02g0774400;Os02g0773800;Os02g0773600	CAA34007;Os01g0115725;Os01g0117500;Os01g0128700;Os01g0137550;Os01g0142300;Os01g0179800;Os01g0182832;Os01g0192401;Os01g0266800;Os01g0305900;Os01g0323000;Os01g0328900;Os01g0332500;Os01g0362100;Os01g0532700;Os03g0322600;Os03g0325500;Os03g0333300;Os03g0345300;Os03g0388900;Os03g0389700;Os03g0399950;Os03g0401951;Os03g0413250;Os03g0414400;Os03g0586500;Os03g0593100;Os03g0594100;Os03g0644400;Os03g0654900;…	0.0239879	-2.48114	down
MSTRG.19045.1	Os02g0829900;Os02g0828533;Os02g0830801;Os02g0828900;Os02g0828200;Os02g0832000;Os02g0828300;Os02g0831500;Os02g0830100;Os02g0829200;Os02g0831800;Os02g0829400;Os02g0828600;Os02g0831900;Os02g0828400;Os02g0830750;Os02g0829100;Os02g0831200;Os02g0830200;Os02g0828566;Os02g0829800;Os02g0830900;Os02g0829850;Os02g0831000;Os02g0829600;Os02g0830700;Os02g0829500;Os02g0830300;Os02g0831600;Os02g0831100;Os02g0831…	BAC19863;BAC19864;CAA33917;Os01g0106300;Os01g0115200;Os01g0119100;Os01g0126000;Os01g0126900;Os01g0130200;Os01g0140100;Os01g0140700;Os01g0170900;Os01g0179500;Os01g0181033;Os01g0192600;Os01g0201700;Os01g0223900;Os01g0243700;Os01g0248701;Os01g0249050;Os01g0249100;Os01g0261700;Os01g0270300;Os01g0272650;Os01g0273200;Os01g0287400;Os01g0294700;Os01g0296700;Os01g0300900;Os01g0312500;Os01g0312600;Os01g031…	0.01276	-5.03703	down
MSTRG.19198.13	Os03g0112600;Os03g0109650;Os03g0113000;Os03g0109700;Os03g0112101;Os03g0110600;Os03g0113100;Os03g0111500;Os03g0109800;Os03g0110800;Os03g0110700;Os03g0111100;Os03g0109600;Os03g0112900;Os03g0111800;Os03g0110300;Os03g0112700;Os03g0110400;Os03g0112800;Os03g0109900;Os03g0109400;Os03g0110500;Os03g0109450;Os03g0112400;Os03g0111400;Os03g0111700;Os03g0109500;Os03g0111200;Os03g0111300;Os03g0111600	CAA33908;Os01g0100466;Os01g0101850;Os01g0104500;Os01g0109700;Os01g0110200;Os01g0110400;Os01g0112500;Os01g0114600;Os01g0115100;Os01g0117100;Os01g0117500;Os01g0118000;Os01g0120600;Os01g0121500;Os01g0121800;Os01g0125850;Os01g0128200;Os01g0128250;Os01g0128400;Os01g0133500;Os01g0134900;Os01g0137950;Os01g0139200;Os01g0147800;Os01g0150500;Os01g0150950;Os01g0151600;Os01g0153600;Os01g0154600;Os01g0155600;…	0.0304016	-1.60015	down
MSTRG.19426.1	Os03g0133825;Os03g0131900;Os03g0135550;Os03g0134500;Os03g0135200;Os03g0131400;Os03g0132900;Os03g0131950;Os03g0133400;Os03g0135150;Os03g0132000;Os03g0132250;Os03g0135600;Os03g0133100;Os03g0134300;Os03g0135400;Os03g0134900;Os03g0133300;Os03g0133850;Os03g0135100;Os03g0132800;Os03g0134550;Os03g0133000;Os03g0132550;Os03g0134600;Os03g0135300;Os03g0133500;Os03g0134800;Os03g0132300;Os03g0133650;Os03g0135…	BAC19868;BAC19872;BAC19873;BAC19902;CAA33920;CAA33927;CAA33941;CAA33951;Os01g0100300;Os01g0100900;Os01g0101900;Os01g0102000;Os01g0103900;Os01g0107750;Os01g0107900;Os01g0108000;Os01g0108400;Os01g0108700;Os01g0109366;Os01g0110600;Os01g0111000;Os01g0111200;Os01g0112000;Os01g0113200;Os01g0113300;Os01g0113325;Os01g0113400;Os01g0113450;Os01g0113500;Os01g0113650;Os01g0113700;Os01g0113800;Os01g0114100;Os…	0.048046	3.90567	up
MSTRG.1947.1	Os01g0358700;Os01g0356800;Os01g0358800;Os01g0357500;Os01g0356900;Os01g0357100;Os01g0358551;Os01g0357150;Os01g0357400;Os01g0356500;Os01g0357200;Os01g0358300;Os01g0357800;Os01g0358900;Os01g0358400;Os01g0356951;Os01g0358100;Os01g0357900	Os01g0113350;Os01g0138000;Os01g0150200;Os01g0153300;Os01g0155000;Os01g0155500;Os01g0177100;Os01g0179600;Os01g0180400;Os01g0201250;Os01g0202500;Os01g0210800;Os01g0216300;Os01g0220200;Os01g0227300;Os01g0227500;Os01g0236900;Os01g0267800;Os01g0327500;Os01g0347000;Os01g0352200;Os01g0357100;Os01g0383700;Os01g0384300;Os01g0505500;Os03g0275950;Os03g0292200;Os03g0293500;Os03g0295300;Os03g0297600;Os03g0302…	0.00836749	-2.10316	down
MSTRG.19712.1	Os03g0165400;Os03g0165025;Os03g0165800;Os03g0165266;Os03g0164800;Os03g0165900;Os03g0165000;Os03g0163900;Os03g0164400;Os03g0163600;Os03g0165300;Os03g0165050;Os03g0163500;Os03g0163300;Os03g0166100;Os03g0164700;Os03g0165100;Os03g0165375;Os03g0164200;Os03g0164100;Os03g0165600;Os03g0163400;Os03g0166200;Os03g0166000;Os03g0163200;Os03g0164300;Os03g0164901;Os03g0166600;Os03g0165350	BAC19898;CAA33938;CAA33956;Os01g0103100;Os01g0121500;Os01g0127300;Os01g0128200;Os01g0128400;Os01g0131450;Os01g0136000;Os01g0138000;Os01g0139200;Os01g0144600;Os01g0148200;Os01g0150950;Os01g0154600;Os01g0155600;Os01g0158800;Os01g0159000;Os01g0159400;Os01g0159500;Os01g0159800;Os01g0168100;Os01g0168850;Os01g0174300;Os01g0175700;Os01g0176300;Os01g0177200;Os01g0180300;Os01g0183633;Os01g0191100;Os01g019…	6.00991e-05	6.59337	up
MSTRG.20433.1	Os03g0246900;Os03g0248250;Os03g0249900;Os03g0248300;Os03g0250301;Os03g0249700;Os03g0249100;Os03g0247000;Os03g0248225;Os03g0247100;Os03g0249200;Os03g0249500;Os03g0247200;Os03g0249300;Os03g0247750;Os03g0247400;Os03g0248400;Os03g0247300;Os03g0248600;Os03g0248500;Os03g0246800;Os03g0248200;Os03g0250000;Os03g0247600;Os03g0249400;Os03g0247900;Os03g0250200;Os03g0248000	BAC19868;BAC19872;BAC19873;BAC19902;CAA33927;Os01g0100300;Os01g0100466;Os01g0100900;Os01g0101900;Os01g0102000;Os01g0103650;Os01g0103900;Os01g0106900;Os01g0107750;Os01g0107900;Os01g0108000;Os01g0108400;Os01g0109366;Os01g0109700;Os01g0110100;Os01g0110200;Os01g0110400;Os01g0110600;Os01g0111200;Os01g0112000;Os01g0113200;Os01g0113300;Os01g0113325;Os01g0113400;Os01g0113450;Os01g0113500;Os01g0113700;Os0…	0.0224426	4.72405	up
MSTRG.2089.1	Os01g0383900;Os01g0386600;Os01g0384800;Os01g0385400;Os01g0384901;Os01g0384300;Os01g0383700;Os01g0386500;Os01g0384450;Os01g0385000	BAC19898;CAA33956;Os01g0103075;Os01g0103100;Os01g0120800;Os01g0121500;Os01g0128200;Os01g0136000;Os01g0138232;Os01g0144600;Os01g0148200;Os01g0152100;Os01g0154600;Os01g0158800;Os01g0159000;Os01g0159800;Os01g0166400;Os01g0167800;Os01g0168850;Os01g0174300;Os01g0176900;Os01g0183500;Os01g0191100;Os01g0191500;Os01g0192000;Os01g0192101;Os01g0192300;Os01g0195200;Os01g0200600;Os01g0205500;Os01g0210200;Os01…	0.00283111	5.26976	up
MSTRG.2092.1	Os01g0385000;Os01g0383700;Os01g0384450;Os01g0386500;Os01g0384300;Os01g0384901;Os01g0386700;Os01g0386600;Os01g0383900;Os01g0384800;Os01g0385400	BAC19868;BAC19872;BAC19873;BAC19902;CAA33920;CAA33927;CAA33928;CAA33941;CAA33951;CAA33999;Os01g0100300;Os01g0100900;Os01g0101900;Os01g0102000;Os01g0103900;Os01g0107750;Os01g0107900;Os01g0108000;Os01g0108400;Os01g0108700;Os01g0109366;Os01g0109700;Os01g0110400;Os01g0110600;Os01g0111000;Os01g0111200;Os01g0112000;Os01g0113200;Os01g0113300;Os01g0113325;Os01g0113400;Os01g0113450;Os01g0113500;Os01g01136…	0.00859833	5.01613	up
MSTRG.2103.4	Os01g0387133;Os01g0386500;Os01g0385000;Os01g0386600;Os01g0384800;Os01g0385400;Os01g0384901;Os01g0386700	CAA33959;CAA33973;CAA33991;Os01g0117025;Os01g0162500;Os01g0175733;Os01g0222600;Os01g0233800;Os01g0237000;Os01g0251000;Os01g0357400;Os01g0387133;Os01g0509800;Os01g0528800;Os03g0308850;Os03g0336900;Os03g0337600;Os03g0375933;Os03g0401333;Os03g0640800;Os03g0664400;Os03g0722000;Os03g0722200;Os03g0741900;Os03g0856500;Os04g0116900;Os04g0163800;Os04g0166600;Os04g0173800;Os04g0337800;Os04g0347400;Os04g038…	0.0298557	1.87634	up
MSTRG.21124.1	Os03g0327900;Os03g0329900;Os03g0329700;Os03g0330000;Os03g0330200;Os03g0328501;Os03g0328600;Os03g0328100;Os03g0328900;Os03g0329200;Os03g0328400;Os03g0328300;Os03g0330300;Os03g0328000;Os03g0327800;Os03g0329500	Os01g0100466;Os01g0103650;Os01g0105800;Os01g0109700;Os01g0110200;Os01g0110400;Os01g0112500;Os01g0114600;Os01g0115100;Os01g0118000;Os01g0121800;Os01g0124600;Os01g0125850;Os01g0128250;Os01g0128400;Os01g0133500;Os01g0134900;Os01g0136850;Os01g0137950;Os01g0139200;Os01g0149350;Os01g0151600;Os01g0154600;Os01g0155600;Os01g0159400;Os01g0164400;Os01g0166100;Os01g0168100;Os01g0169400;Os01g0172200;Os01g0176…	0.0452578	4.09095	up
MSTRG.2117.1	Os01g0389200;Os01g0388500;Os01g0387865;Os01g0388200;Os01g0389700;Os01g0388700;Os01g0387133;Os01g0388101;Os01g0387566;Os01g0388000	Os01g0100466;Os01g0101850;Os01g0102500;Os01g0104500;Os01g0108500;Os01g0109700;Os01g0110200;Os01g0112500;Os01g0114600;Os01g0115100;Os01g0117100;Os01g0118000;Os01g0120600;Os01g0121500;Os01g0125850;Os01g0128200;Os01g0128250;Os01g0128400;Os01g0134900;Os01g0138000;Os01g0139200;Os01g0147800;Os01g0150500;Os01g0150950;Os01g0151600;Os01g0153600;Os01g0154600;Os01g0155600;Os01g0158800;Os01g0159000;Os01g0159…	0.00176721	3.09689	up
MSTRG.21334.1	Os03g0355100;Os03g0355200	Os01g0100466;Os01g0101850;Os01g0110200;Os01g0112500;Os01g0114600;Os01g0115100;Os01g0117100;Os01g0117500;Os01g0118000;Os01g0120600;Os01g0128200;Os01g0128250;Os01g0128400;Os01g0133500;Os01g0134900;Os01g0137950;Os01g0138000;Os01g0139200;Os01g0147800;Os01g0150500;Os01g0151600;Os01g0153600;Os01g0154600;Os01g0155600;Os01g0158800;Os01g0159400;Os01g0159500;Os01g0164400;Os01g0168100;Os01g0175700;Os01g0176…	0.0191478	1.98285	up
MSTRG.2161.3	Os01g0444100;Os01g0495900;Os01g0496900;Os01g0495200	BAC19868;BAC19872;BAC19873;BAC19902;CAA33920;CAA33927;CAA33928;CAA33941;CAA33951;CAA33999;Os01g0100300;Os01g0100900;Os01g0101900;Os01g0102000;Os01g0103900;Os01g0107750;Os01g0107900;Os01g0108000;Os01g0108400;Os01g0108700;Os01g0109366;Os01g0110400;Os01g0110600;Os01g0111000;Os01g0111200;Os01g0112000;Os01g0113200;Os01g0113300;Os01g0113325;Os01g0113400;Os01g0113450;Os01g0113500;Os01g0113650;Os01g01137…	0.0075531	5.99214	up
MSTRG.2171.1	Os01g0497400;Os01g0498200;Os01g0500400;Os01g0500500;Os01g0500100;Os01g0500600;Os01g0498300;Os01g0499300	BAC19868;BAC19872;BAC19873;BAC19902;CAA33920;CAA33927;CAA33928;CAA33941;CAA33951;CAA33999;Os01g0100300;Os01g0100900;Os01g0101900;Os01g0102000;Os01g0103900;Os01g0107750;Os01g0107900;Os01g0108000;Os01g0108400;Os01g0108700;Os01g0109366;Os01g0110400;Os01g0110600;Os01g0111000;Os01g0111200;Os01g0112000;Os01g0113200;Os01g0113300;Os01g0113325;Os01g0113400;Os01g0113450;Os01g0113500;Os01g0113650;Os01g01137…	0.00533907	6.26258	up
MSTRG.2172.1	Os01g0499300;Os01g0500600;Os01g0498300;Os01g0500500;Os01g0500100;Os01g0497400;Os01g0500400;Os01g0498200	BAC19875;CAA33986;CAA33987;Os01g0100700;Os01g0103075;Os01g0103800;Os01g0104800;Os01g0106400;Os01g0106500;Os01g0108200;Os01g0109201;Os01g0112100;Os01g0112600;Os01g0112800;Os01g0113150;Os01g0120800;Os01g0123500;Os01g0127400;Os01g0129600;Os01g0136000;Os01g0138100;Os01g0143300;Os01g0143350;Os01g0143800;Os01g0147700;Os01g0152951;Os01g0153550;Os01g0153950;Os01g0159200;Os01g0159800;Os01g0162001;Os01g016…	0.0228563	4.3879	up
MSTRG.2200.3	Os01g0501700;Os01g0502300;Os01g0502800;Os01g0502400;Os01g0503400;Os01g0504100;Os01g0502900;Os01g0501800;Os01g0502700;Os01g0504500	Os01g0150200;Os01g0152300;Os01g0153300;Os01g0179600;Os01g0180400;Os01g0201250;Os01g0210800;Os01g0215500;Os01g0216300;Os01g0216400;Os01g0220200;Os01g0227300;Os01g0236300;Os01g0236900;Os01g0242200;Os01g0297200;Os01g0346700;Os01g0347000;Os03g0289100;Os03g0302500;Os03g0342100;Os03g0364400;Os03g0366200;Os03g0375966;Os03g0441000;Os03g0587100;Os03g0594250;Os03g0595050;Os03g0595200;Os03g0618300;Os03g0634…	0.0214051	-2.61353	down
MSTRG.2212.1	Os01g0505866;Os01g0505600;Os01g0504100;Os01g0505400;Os01g0506200;Os01g0504950;Os01g0506100;Os01g0504500;Os01g0505700	BAC19868;BAC19872;BAC19873;BAC19902;CAA33920;CAA33927;CAA33928;CAA33941;CAA33951;Os01g0100100;Os01g0100300;Os01g0100466;Os01g0100900;Os01g0101900;Os01g0102000;Os01g0103900;Os01g0106900;Os01g0107750;Os01g0107900;Os01g0108000;Os01g0108400;Os01g0108700;Os01g0109366;Os01g0109700;Os01g0110100;Os01g0110400;Os01g0110600;Os01g0111000;Os01g0111200;Os01g0112000;Os01g0113200;Os01g0113300;Os01g0113325;Os01g0…	0.0188203	4.35205	up
MSTRG.22189.3	Os03g0592100;Os03g0591600;Os03g0592500;Os03g0590700;Os03g0593100;Os03g0592950;Os03g0591801;Os03g0593200;Os03g0593600;Os03g0591000;Os03g0591300;Os03g0593700	BAC19875;CAA33986;CAA33987;Os01g0100700;Os01g0103000;Os01g0104800;Os01g0106400;Os01g0106500;Os01g0108200;Os01g0109201;Os01g0112100;Os01g0112600;Os01g0112800;Os01g0113150;Os01g0120800;Os01g0123500;Os01g0127400;Os01g0129600;Os01g0138100;Os01g0143300;Os01g0143350;Os01g0147700;Os01g0152951;Os01g0153550;Os01g0153950;Os01g0157800;Os01g0159200;Os01g0162300;Os01g0164500;Os01g0167600;Os01g0168300;Os01g016…	0.000437929	6.957	up
MSTRG.22338.1	Os03g0614901;Os03g0613100;Os03g0615700;Os03g0615300	BAC19868;BAC19872;BAC19873;BAC19902;CAA33920;CAA33927;CAA33941;CAA33951;Os01g0100300;Os01g0100466;Os01g0100900;Os01g0101850;Os01g0101900;Os01g0102000;Os01g0103900;Os01g0104500;Os01g0104600;Os01g0106900;Os01g0107750;Os01g0107900;Os01g0108000;Os01g0108400;Os01g0108700;Os01g0109366;Os01g0109700;Os01g0110200;Os01g0110400;Os01g0110600;Os01g0111000;Os01g0111200;Os01g0112000;Os01g0113200;Os01g0113300;Os…	0.000646115	6.25418	up
MSTRG.22745.2	Os03g0677101;Os03g0676400;Os03g0675700;Os03g0679100;Os03g0676100;Os03g0678800;Os03g0679300;Os03g0676300;Os03g0677475;Os03g0679000;Os03g0678950;Os03g0678400;Os03g0675600	BAC19868;BAC19872;BAC19902;CAA33920;CAA33941;CAA33951;CAA33953;Os01g0100300;Os01g0100466;Os01g0100900;Os01g0101850;Os01g0101900;Os01g0102000;Os01g0103900;Os01g0104500;Os01g0104600;Os01g0106900;Os01g0107750;Os01g0107900;Os01g0108000;Os01g0108400;Os01g0108700;Os01g0109366;Os01g0109700;Os01g0110200;Os01g0110400;Os01g0110600;Os01g0111000;Os01g0111200;Os01g0111500;Os01g0112000;Os01g0113200;Os01g011330…	0.0383151	4.91221	up
MSTRG.23215.1	Os03g0740800;Os03g0741900;Os03g0741600;Os03g0742300;Os03g0739500;Os03g0741100;Os03g0740600;Os03g0742850;Os03g0742400;Os03g0742900;Os03g0741400;Os03g0738900;Os03g0738200;Os03g0740700;Os03g0740833;Os03g0741700;Os03g0738600;Os03g0741525;Os03g0742800;Os03g0741500;Os03g0740200;Os03g0741000;Os03g0739700;Os03g0738400;Os03g0738700;Os03g0738300	Os01g0103650;Os01g0113350;Os01g0136850;Os01g0137950;Os01g0138000;Os01g0149350;Os01g0177100;Os01g0179600;Os01g0182200;Os01g0189800;Os01g0194600;Os01g0201200;Os01g0209800;Os01g0209901;Os01g0220200;Os01g0221400;Os01g0222500;Os01g0222600;Os01g0223000;Os01g0227300;Os01g0227500;Os01g0252100;Os01g0259200;Os01g0265400;Os01g0274100;Os01g0281000;Os01g0299801;Os01g0315600;Os01g0327500;Os01g0347000;Os01g0357…	0.00188701	-2.08237	down
MSTRG.23452.2	Os03g0766350;Os03g0769700;Os03g0767500;Os03g0765900;Os03g0766100;Os03g0766000;Os03g0769600;Os03g0766500;Os03g0769500;Os03g0766200;Os03g0769800;Os03g0767600;Os03g0766600;Os03g0769000;Os03g0769900;Os03g0766900;Os03g0770000;Os03g0768450;Os03g0766800;Os03g0767650;Os03g0767900;Os03g0767700;Os03g0769100;Os03g0769400;Os03g0767800;Os03g0769050;Os03g0770100;Os03g0768900;Os03g0765800;Os03g0767000	CAA33917;Os01g0108800;Os01g0115200;Os01g0155000;Os01g0155500;Os01g0160700;Os01g0209800;Os01g0227300;Os01g0228600;Os01g0234300;Os01g0317500;Os01g0384300;Os01g0505500;Os01g0520600;Os01g0524500;Os01g0527900;Os03g0292200;Os03g0305800;Os03g0333200;Os03g0339700;Os03g0341600;Os03g0356484;Os03g0436300;Os03g0587100;Os03g0598002;Os03g0624600;Os03g0705800;Os03g0746700;Os03g0752300;Os03g0755100;Os03g0755900;…	0.036626	-1.68088	down
MSTRG.24489.1	Os04g0136000;Os04g0134800;Os04g0136016;Os04g0136700;Os04g0136200;Os04g0135400	BAC19872;BAC19902;CAA33920;CAA33940;CAA33941;CAA33953;CAA33961;CAA34015;Os01g0100300;Os01g0100466;Os01g0100900;Os01g0101850;Os01g0102000;Os01g0103900;Os01g0104500;Os01g0107900;Os01g0108000;Os01g0109700;Os01g0110200;Os01g0110400;Os01g0110600;Os01g0111200;Os01g0111500;Os01g0113300;Os01g0113400;Os01g0113500;Os01g0114600;Os01g0114800;Os01g0116250;Os01g0117000;Os01g0117100;Os01g0118000;Os01g0120600;Os…	0.0385505	3.18407	up
MSTRG.24531.10	Os04g0139100;Os04g0138800;Os04g0141800;Os04g0142100;Os04g0139201;Os04g0141400	CAA34013;Os01g0114400;Os01g0115500;Os01g0116901;Os01g0117450;Os01g0117650;Os01g0117700;Os01g0133200;Os01g0136500;Os01g0151750;Os01g0153000;Os01g0163450;Os01g0193400;Os01g0197350;Os01g0216400;Os01g0231950;Os01g0248800;Os01g0263000;Os01g0281050;Os01g0290600;Os01g0297200;Os01g0326100;Os01g0326300;Os01g0346600;Os01g0357200;Os01g0374000;Os01g0388700;Os03g0279700;Os03g0286100;Os03g0320850;Os03g0327700;…	0.0400268	-4.91741	down
MSTRG.24654.1	Os04g0160600;Os04g0158400;Os04g0157300;Os04g0160801;Os04g0158750	Os01g0100650;Os01g0102850;Os01g0104000;Os01g0105900;Os01g0106500;Os01g0116600;Os01g0127450;Os01g0141900;Os01g0144100;Os01g0144700;Os01g0162001;Os01g0166800;Os01g0188200;Os01g0191200;Os01g0197400;Os01g0205100;Os01g0206700;Os01g0219300;Os01g0221700;Os01g0221900;Os01g0224700;Os01g0226500;Os01g0229400;Os01g0235400;Os01g0237000;Os01g0248600;Os01g0259600;Os01g0259900;Os01g0275300;Os01g0281200;Os01g0284…	0.0341503	2.59914	up
MSTRG.2468.1	Os01g0542100;Os01g0543100;Os01g0542700;Os01g0541800;Os01g0542000;Os01g0541900;Os01g0543600;Os01g0543800;Os01g0543000;Os01g0543400	BAC19875;CAA33947;CAA33956;CAA33991;CAA34005;CAA34006;Os01g0103075;Os01g0103100;Os01g0103800;Os01g0105900;Os01g0120800;Os01g0127300;Os01g0127400;Os01g0128800;Os01g0131450;Os01g0131600;Os01g0136000;Os01g0143350;Os01g0143800;Os01g0144600;Os01g0147900;Os01g0159000;Os01g0159800;Os01g0166300;Os01g0167800;Os01g0168600;Os01g0168850;Os01g0174300;Os01g0175700;Os01g0178200;Os01g0180300;Os01g0181000;Os01g01…	0.0126372	1.55562	up
MSTRG.25047.1	Os04g0227200;Os04g0226600;Os04g0227100;Os04g0226633;Os04g0225700;Os04g0226340;Os04g0226800;Os04g0225400;Os04g0227000;Os04g0226666;Os04g0226400;Os04g0227500	Os01g0100466;Os01g0101850;Os01g0102000;Os01g0104500;Os01g0108500;Os01g0109700;Os01g0110200;Os01g0110400;Os01g0111500;Os01g0112500;Os01g0114600;Os01g0115100;Os01g0117000;Os01g0117100;Os01g0118000;Os01g0120600;Os01g0121500;Os01g0121600;Os01g0122534;Os01g0125850;Os01g0128200;Os01g0128250;Os01g0128400;Os01g0133500;Os01g0134900;Os01g0135800;Os01g0139200;Os01g0147800;Os01g0150500;Os01g0150950;Os01g0151…	0.000216371	6.54919	up
MSTRG.25068.1	Os04g0230501;Os04g0229100;Os04g0228600;Os04g0228400;Os04g0231200;Os04g0231266;Os04g0228300;Os04g0228100	Os01g0103650;Os01g0110100;Os01g0114600;Os01g0115100;Os01g0118300;Os01g0124600;Os01g0134900;Os01g0136850;Os01g0149350;Os01g0159400;Os01g0164400;Os01g0167400;Os01g0169400;Os01g0179300;Os01g0180600;Os01g0180700;Os01g0182200;Os01g0183300;Os01g0189800;Os01g0210600;Os01g0215000;Os01g0216000;Os01g0222500;Os01g0225400;Os01g0235200;Os01g0239150;Os01g0243100;Os01g0243300;Os01g0246500;Os01g0252100;Os01g0254…	0.0325424	3.78293	up
MSTRG.25178.1	Os04g0252850;Os04g0253601;Os04g0254000;Os04g0255525;Os04g0255600;Os04g0254300;Os04g0253000	Os01g0100700;Os01g0103100;Os01g0106400;Os01g0112600;Os01g0112800;Os01g0113150;Os01g0120800;Os01g0127000;Os01g0136000;Os01g0136100;Os01g0136200;Os01g0138232;Os01g0144600;Os01g0152100;Os01g0152951;Os01g0153550;Os01g0153950;Os01g0154250;Os01g0157600;Os01g0159200;Os01g0159800;Os01g0162300;Os01g0166400;Os01g0167800;Os01g0168850;Os01g0173100;Os01g0176400;Os01g0176900;Os01g0181300;Os01g0183500;Os01g0189…	0.0125887	4.79779	up
MSTRG.25194.5	Os04g0257500;Os04g0255525;Os04g0255600	Os01g0114400;Os01g0115566;Os01g0116901;Os01g0117450;Os01g0117650;Os01g0136500;Os01g0151750;Os01g0152300;Os01g0153000;Os01g0153300;Os01g0180400;Os01g0193400;Os01g0215500;Os01g0216300;Os01g0216400;Os01g0236300;Os01g0263000;Os01g0281050;Os01g0297200;Os01g0357200;Os01g0374000;Os03g0320850;Os03g0327700;Os03g0365900;Os03g0375966;Os03g0436600;Os03g0579900;Os03g0589100;Os03g0594250;Os03g0595050;Os03g0597…	0.0272542	-1.98758	down
MSTRG.25274.1	Os04g0272400;Os04g0269800;Os04g0270900;Os04g0272500;Os04g0270550;Os04g0271000;Os04g0273100;Os04g0269900;Os04g0272200;Os04g0270100;Os04g0271200;Os04g0272700;Os04g0271700;Os04g0270200	BAC19868;BAC19872;BAC19873;BAC19902;CAA33920;CAA33927;CAA33928;CAA33941;CAA33951;Os01g0100300;Os01g0100900;Os01g0101900;Os01g0102000;Os01g0103900;Os01g0107750;Os01g0107900;Os01g0108000;Os01g0108400;Os01g0108700;Os01g0109366;Os01g0110400;Os01g0110600;Os01g0111000;Os01g0111200;Os01g0112000;Os01g0113200;Os01g0113300;Os01g0113325;Os01g0113400;Os01g0113450;Os01g0113500;Os01g0113650;Os01g0113700;Os01g0…	0.00248885	5.66745	up
MSTRG.25415.1	Os04g0297800;Os04g0298200;Os04g0298700;Os04g0297933;Os04g0298600;Os04g0296301;Os04g0296700;Os04g0298066;Os04g0298501	CAA33963;CAA33964;Os01g0126200;Os01g0130200;Os01g0137250;Os01g0170300;Os01g0171000;Os01g0179500;Os01g0192600;Os01g0201700;Os01g0207400;Os01g0211800;Os01g0223900;Os01g0248701;Os01g0272650;Os01g0290700;Os01g0294700;Os01g0296700;Os01g0312600;Os01g0313300;Os01g0364800;Os01g0369200;Os01g0510901;Os01g0513850;Os01g0521550;Os03g0298800;Os03g0302800;Os03g0304500;Os03g0311600;Os03g0333400;Os03g0379400;Os03…	0.0361513	-2.1343	down
MSTRG.25427.2	Os04g0300600;Os04g0301500;Os04g0302400;Os04g0301700;Os04g0302300	Os01g0150200;Os01g0155000;Os01g0177100;Os01g0179600;Os01g0180400;Os01g0201250;Os01g0210800;Os01g0215500;Os01g0220200;Os01g0221400;Os01g0227300;Os01g0346700;Os01g0347000;Os03g0293500;Os03g0295300;Os03g0302500;Os03g0310400;Os03g0337550;Os03g0342100;Os03g0366200;Os03g0587100;Os03g0594250;Os03g0598002;Os03g0626600;Os03g0634400;Os03g0682100;Os03g0687700;Os03g0725050;Os03g0752300;Os03g0755100;Os03g0760…	0.0411058	-1.97576	down
MSTRG.2618.1	Os01g0563700;Os01g0561500;Os01g0563000;Os01g0560200;Os01g0561600;Os01g0561950;Os01g0560000;Os01g0563500	CAA33938;CAA33947;CAA33956;CAA33991;Os01g0105800;Os01g0127300;Os01g0128800;Os01g0137950;Os01g0138000;Os01g0147900;Os01g0162200;Os01g0168100;Os01g0175700;Os01g0180300;Os01g0192101;Os01g0192300;Os01g0194600;Os01g0205200;Os01g0221400;Os01g0222600;Os01g0229100;Os01g0252100;Os01g0263600;Os01g0269100;Os01g0274100;Os01g0281000;Os01g0299700;Os01g0309900;Os01g0310100;Os01g0315600;Os01g0316600;Os01g0332800…	0.0046047	4.96012	up
MSTRG.26192.6	Os04g0431300;Os04g0433200;Os04g0430150;Os04g0430200;Os04g0430700;Os04g0431800;Os04g0432100;Os04g0432800;Os04g0430950;Os04g0430900;Os04g0431000;Os04g0430800;Os04g0432400;Os04g0432600;Os04g0432250;Os04g0430600;Os04g0431100;Os04g0433100;Os04g0430400;Os04g0430000;Os04g0433000;Os04g0432300;Os04g0431700;Os04g0431200;Os04g0429900;Os04g0430100;Os04g0432200;Os04g0432500	BAC19864;CAA33963;CAA33964;CAA33965;Os01g0111900;Os01g0115200;Os01g0119100;Os01g0130200;Os01g0132100;Os01g0171000;Os01g0179500;Os01g0192600;Os01g0201700;Os01g0222900;Os01g0223600;Os01g0223900;Os01g0248701;Os01g0249100;Os01g0261700;Os01g0273200;Os01g0287400;Os01g0294700;Os01g0300900;Os01g0312500;Os01g0330650;Os01g0364800;Os01g0510901;Os01g0515300;Os01g0520600;Os01g0524500;Os01g0525701;Os03g0281000…	0.0421659	-1.54432	down
MSTRG.26785.1	Os04g0500400;Os04g0501500;Os04g0498725;Os04g0500300;Os04g0499300;Os04g0498101;Os04g0501700;Os04g0499100;Os04g0498400;Os04g0498200;Os04g0502200;Os04g0501200;Os04g0500700;Os04g0501100;Os04g0498700;Os04g0498800;Os04g0497900;Os04g0500900;Os04g0502300;Os04g0497700;Os04g0502100;Os04g0498600;Os04g0499200;Os04g0501800;Os04g0501000;Os04g0498900;Os04g0498650;Os04g0499500;Os04g0498000;Os04g0500200;Os04g0497…	BAC19868;BAC19872;BAC19873;BAC19902;CAA33920;CAA33927;CAA33928;CAA33941;CAA33951;CAA33999;Os01g0100300;Os01g0100900;Os01g0101900;Os01g0102000;Os01g0103900;Os01g0107750;Os01g0107900;Os01g0108000;Os01g0108400;Os01g0108700;Os01g0109366;Os01g0109700;Os01g0110400;Os01g0110600;Os01g0111000;Os01g0111200;Os01g0112000;Os01g0113200;Os01g0113300;Os01g0113325;Os01g0113400;Os01g0113450;Os01g0113500;Os01g01136…	0.00265179	4.69412	up
MSTRG.27106.6	Os04g0544400;Os04g0542200;Os04g0541234;Os04g0543700;Os04g0541100;Os04g0544500;Os04g0544100;Os04g0543033;Os04g0544000;Os04g0543500;Os04g0544200;Os04g0542800;Os04g0541900;Os04g0543000;Os04g0541500;Os04g0543600;Os04g0543100;Os04g0542900;Os04g0541700;Os04g0543650;Os04g0542302;Os04g0542100;Os04g0542000;Os04g0543900;Os04g0543200;Os04g0544700	Os01g0113350;Os01g0153300;Os01g0175600;Os01g0179600;Os01g0180400;Os01g0201200;Os01g0201250;Os01g0215500;Os01g0216300;Os01g0216400;Os01g0220200;Os01g0221400;Os01g0227300;Os01g0236300;Os01g0267800;Os01g0274100;Os01g0281000;Os01g0281050;Os01g0297200;Os01g0347000;Os01g0357150;Os01g0505500;Os03g0279200;Os03g0292600;Os03g0295300;Os03g0297600;Os03g0302500;Os03g0310701;Os03g0337550;Os03g0342100;Os03g0364…	6.9725e-06	-7.25569	down
MSTRG.27254.1	Os04g0563350;Os04g0561950;Os04g0564000;Os04g0563000;Os04g0562100;Os04g0561600;Os04g0563700;Os04g0561200;Os04g0562000;Os04g0563900;Os04g0563300;Os04g0563050;Os04g0562800;Os04g0561700;Os04g0561900;Os04g0562500;Os04g0561000;Os04g0561800;Os04g0563401;Os04g0560700;Os04g0563100;Os04g0561550;Os04g0562650;Os04g0563801;Os04g0563950;Os04g0561500	CAA33938;CAA33947;CAA33956;CAA33991;CAA34006;Os01g0105800;Os01g0113350;Os01g0127300;Os01g0128800;Os01g0131450;Os01g0137950;Os01g0138000;Os01g0155600;Os01g0159000;Os01g0159400;Os01g0162200;Os01g0168100;Os01g0174300;Os01g0175700;Os01g0176700;Os01g0180300;Os01g0183633;Os01g0191500;Os01g0192101;Os01g0192300;Os01g0194600;Os01g0205200;Os01g0205500;Os01g0210200;Os01g0222600;Os01g0252100;Os01g0259200;Os0…	0.00582424	4.88951	up
MSTRG.27417.1	Os04g0582700;Os04g0582000;Os04g0584300;Os04g0583500;Os04g0583266;Os04g0581700;Os04g0582600;Os04g0581000;Os04g0581800;Os04g0583101;Os04g0581100;Os04g0581050;Os04g0584201;Os04g0584500;Os04g0581451;Os04g0583700;Os04g0584550;Os04g0581300;Os04g0581400;Os04g0581502;Os04g0583000;Os04g0582900;Os04g0583900;Os04g0581600;Os04g0583200;Os04g0583600;Os04g0584100;Os04g0583800	Os01g0100700;Os01g0103075;Os01g0103100;Os01g0106400;Os01g0112600;Os01g0112800;Os01g0113150;Os01g0120800;Os01g0127000;Os01g0136000;Os01g0136100;Os01g0138232;Os01g0144600;Os01g0148200;Os01g0152100;Os01g0153550;Os01g0153950;Os01g0157600;Os01g0159000;Os01g0159200;Os01g0159800;Os01g0166400;Os01g0167800;Os01g0168850;Os01g0173100;Os01g0176900;Os01g0183500;Os01g0189100;Os01g0191100;Os01g0195200;Os01g0200…	0.0252003	4.34813	up
MSTRG.27557.1	Os04g0597816;Os04g0597501;Os04g0597800;Os04g0600300;Os04g0599000;Os04g0597866;Os04g0597300;Os04g0599100;Os04g0598500;Os04g0600100;Os04g0600400;Os04g0597534;Os04g0600651;Os04g0598300;Os04g0599700;Os04g0597900;Os04g0597700;Os04g0599300;Os04g0599400;Os04g0598000;Os04g0599900;Os04g0598600;Os04g0600200;Os04g0597400;Os04g0599800;Os04g0600000;Os04g0600500;Os04g0598200;Os04g0599650;Os04g0597600;Os04g0598…	BAC19875;Os01g0100700;Os01g0103075;Os01g0103800;Os01g0105900;Os01g0106400;Os01g0108200;Os01g0109201;Os01g0120800;Os01g0123500;Os01g0127400;Os01g0129600;Os01g0136000;Os01g0138600;Os01g0143300;Os01g0143350;Os01g0143800;Os01g0162001;Os01g0164500;Os01g0166300;Os01g0167800;Os01g0168600;Os01g0168800;Os01g0168850;Os01g0171800;Os01g0172800;Os01g0184500;Os01g0192300;Os01g0195200;Os01g0200300;Os01g0200350;…	0.0465855	2.92343	up
MSTRG.27983.2	Os04g0642100;Os04g0640300;Os04g0640750;Os04g0641350;Os04g0640500;Os04g0640800;Os04g0641000;Os04g0640700;Os04g0640600;Os04g0639800;Os04g0641200;Os04g0641450;Os04g0641300;Os04g0642000;Os04g0640900;Os04g0641250;Os04g0641700;Os04g0642300;Os04g0639700;Os04g0641400;Os04g0640200	BAC19865;BAC19868;BAC19872;BAC19873;BAC19902;CAA33927;CAA33928;CAA33941;CAA33951;CAA33989;CAA33999;Os01g0100300;Os01g0100900;Os01g0101900;Os01g0102000;Os01g0103900;Os01g0107750;Os01g0107900;Os01g0108000;Os01g0108400;Os01g0108700;Os01g0109366;Os01g0110600;Os01g0111000;Os01g0111200;Os01g0112000;Os01g0113200;Os01g0113300;Os01g0113325;Os01g0113400;Os01g0113450;Os01g0113500;Os01g0113650;Os01g0113700;O…	0.0319529	3.64597	up
MSTRG.2821.1	Os01g0591000;Os01g0589200;Os01g0592500;Os01g0589300;Os01g0591300;Os01g0590200;Os01g0590300;Os01g0589700;Os01g0591250;Os01g0589800;Os01g0590900;Os01g0589500;Os01g0589900;Os01g0590700;Os01g0589400;Os01g0592900;Os01g0590800;Os01g0590100	BAC19868;BAC19872;BAC19873;BAC19902;CAA33920;CAA33927;CAA33928;CAA33941;CAA33951;CAA33999;Os01g0100300;Os01g0100466;Os01g0100900;Os01g0101900;Os01g0102000;Os01g0103900;Os01g0104500;Os01g0107750;Os01g0107900;Os01g0108000;Os01g0108400;Os01g0108700;Os01g0109366;Os01g0109700;Os01g0110400;Os01g0110600;Os01g0111000;Os01g0111200;Os01g0112000;Os01g0113200;Os01g0113300;Os01g0113325;Os01g0113400;Os01g01134…	0.0451344	4.79772	up
MSTRG.28695.6	Os05g0128300;Os05g0129250;Os05g0128900;Os05g0127200;Os05g0128600;Os05g0129000;Os05g0129100;Os05g0128200;Os05g0129200;Os05g0127233;Os05g0128700;Os05g0129700;Os05g0128350;Os05g0129300;Os05g0127300;Os05g0128400;Os05g0128000;Os05g0127500;Os05g0127400;Os05g0129400;Os05g0128100	CAA33947;CAA33956;CAA33959;CAA33991;Os01g0105900;Os01g0143800;Os01g0147900;Os01g0166300;Os01g0168600;Os01g0175700;Os01g0178200;Os01g0180300;Os01g0181000;Os01g0191200;Os01g0192300;Os01g0194600;Os01g0205200;Os01g0221400;Os01g0222600;Os01g0229100;Os01g0237000;Os01g0241000;Os01g0247500;Os01g0259900;Os01g0263600;Os01g0284700;Os01g0293200;Os01g0309900;Os01g0326000;Os01g0382700;Os01g0387133;Os01g0511200…	0.000310471	5.80013	up
MSTRG.28732.3	Os05g0133401;Os05g0132400;Os05g0134000;Os05g0131900;Os05g0132800;Os05g0132100;Os05g0131000;Os05g0133900;Os05g0131401;Os05g0130600;Os05g0132500;Os05g0130500;Os05g0132000;Os05g0130400;Os05g0132700;Os05g0133100;Os05g0131500;Os05g0131100	CAA33917;Os01g0108800;Os01g0115200;Os01g0150200;Os01g0155000;Os01g0155500;Os01g0177100;Os01g0210800;Os01g0227300;Os01g0384300;Os01g0505500;Os01g0520600;Os01g0527900;Os03g0292200;Os03g0302500;Os03g0303100;Os03g0333200;Os03g0341600;Os03g0342100;Os03g0436300;Os03g0587100;Os03g0598002;Os03g0609500;Os03g0624600;Os03g0650350;Os03g0682100;Os03g0687700;Os03g0705800;Os03g0752300;Os03g0755100;Os03g0755900;…	0.000619538	-6.91022	down
MSTRG.28858.1	Os05g0145700;Os05g0148900;Os05g0145900;Os05g0145400;Os05g0147650;Os05g0145650;Os05g0145600;Os05g0147800;Os05g0148000;Os05g0148700;Os05g0147700;Os05g0145500;Os05g0148600;Os05g0147901;Os05g0147150;Os05g0147550;Os05g0146100;Os05g0148400;Os05g0147400;Os05g0147500;Os05g0147300;Os05g0149000;Os05g0146900;Os05g0147116;Os05g0149100;Os05g0147133;Os05g0148800;Os05g0147100;Os05g0147600;Os05g0148500;Os05g0148…	BAC19875;BAC19898;CAA34005;Os01g0103075;Os01g0103100;Os01g0106400;Os01g0120800;Os01g0128200;Os01g0136000;Os01g0138232;Os01g0144600;Os01g0148200;Os01g0152100;Os01g0157600;Os01g0159000;Os01g0159800;Os01g0166300;Os01g0166400;Os01g0167800;Os01g0168850;Os01g0173100;Os01g0174300;Os01g0176900;Os01g0183500;Os01g0191100;Os01g0192000;Os01g0192101;Os01g0192300;Os01g0195200;Os01g0200300;Os01g0200600;Os01g020…	0.0110314	4.66674	up
MSTRG.28988.1	Os05g0158700;Os05g0160200;Os05g0159300;Os05g0159000;Os05g0161400;Os05g0160100;Os05g0160300;Os05g0158500;Os05g0161200;Os05g0160800;Os05g0161500;Os05g0160000;Os05g0159100;Os05g0159850;Os05g0159500;Os05g0159501;Os05g0159200;Os05g0160600;Os05g0158600;Os05g0159250	BAC19868;BAC19872;BAC19902;CAA33908;CAA33920;CAA33941;Os01g0100466;Os01g0100900;Os01g0101850;Os01g0102000;Os01g0103900;Os01g0104500;Os01g0104600;Os01g0106900;Os01g0107750;Os01g0107900;Os01g0108000;Os01g0108400;Os01g0109366;Os01g0109700;Os01g0110100;Os01g0110200;Os01g0110400;Os01g0110600;Os01g0111200;Os01g0111500;Os01g0112000;Os01g0113300;Os01g0113325;Os01g0113400;Os01g0113450;Os01g0113500;Os01g01…	0.0177996	4.2038	up
MSTRG.2900.1	Os01g0601000;Os01g0601651;Os01g0600900;Os01g0603000;Os01g0602200;Os01g0602400;Os01g0600500;Os01g0601675;Os01g0602600;Os01g0602433;Os01g0600400;Os01g0601200;Os01g0602800;Os01g0603500;Os01g0602500;Os01g0603300;Os01g0603200;Os01g0603100;Os01g0601625;Os01g0602466;Os01g0601700;Os01g0600300	BAC19868;BAC19872;BAC19873;BAC19902;CAA33920;CAA33927;CAA33928;CAA33941;CAA33951;Os01g0100300;Os01g0100900;Os01g0101900;Os01g0102000;Os01g0103900;Os01g0107750;Os01g0107900;Os01g0108000;Os01g0108400;Os01g0108700;Os01g0109366;Os01g0109700;Os01g0110400;Os01g0110600;Os01g0111000;Os01g0111200;Os01g0112000;Os01g0113200;Os01g0113300;Os01g0113325;Os01g0113400;Os01g0113450;Os01g0113500;Os01g0113650;Os01g0…	0.027194	4.61601	up
MSTRG.29366.1	Os05g0214232;Os05g0213900;Os05g0217000;Os05g0214900;Os05g0216950;Os05g0215600;Os05g0213500;Os05g0215500;Os05g0215700;Os05g0215033;Os05g0215300;Os05g0214100;Os05g0215066;Os05g0215183;Os05g0215000;Os05g0215800;Os05g0214300;Os05g0214400	BAC19896;CAA33916;CAA33960;CAA34011;Os01g0106800;Os01g0131600;Os01g0144380;Os01g0151400;Os01g0152000;Os01g0153400;Os01g0169800;Os01g0182900;Os01g0200000;Os01g0207400;Os01g0209500;Os01g0235325;Os01g0239100;Os01g0243901;Os01g0246100;Os01g0265900;Os01g0271500;Os01g0301900;Os01g0330200;Os01g0372450;Os01g0512100;Os01g0513700;Os01g0528300;Os03g0277100;Os03g0298400;Os03g0304800;Os03g0307800;Os03g0310800…	0.00173548	-5.93434	down
MSTRG.29512.1	Os05g0244800;Os05g0244500;Os05g0246300;Os05g0246200;Os05g0245700;Os05g0244700;Os05g0245300;Os05g0247100;Os05g0244900;Os05g0246450;Os05g0244600;Os05g0246600	BAC19894;CAA33958;Os01g0108500;Os01g0117100;Os01g0120600;Os01g0121500;Os01g0121950;Os01g0122367;Os01g0128200;Os01g0128250;Os01g0139200;Os01g0148200;Os01g0150500;Os01g0150950;Os01g0152100;Os01g0152200;Os01g0153600;Os01g0154600;Os01g0155600;Os01g0158800;Os01g0159500;Os01g0174300;Os01g0176300;Os01g0176900;Os01g0177200;Os01g0189700;Os01g0198000;Os01g0201850;Os01g0205300;Os01g0207500;Os01g0207700;Os01…	0.0357044	2.9123	up
MSTRG.29637.1	Os05g0261700	BAC19868;BAC19872;BAC19902;CAA33908;CAA33920;CAA33941;CAA33951;CAA33953;Os01g0100300;Os01g0100466;Os01g0100900;Os01g0101850;Os01g0101900;Os01g0102000;Os01g0103900;Os01g0104500;Os01g0104600;Os01g0106900;Os01g0107750;Os01g0107900;Os01g0108000;Os01g0108400;Os01g0108700;Os01g0109366;Os01g0109700;Os01g0110200;Os01g0110400;Os01g0110600;Os01g0111000;Os01g0111200;Os01g0111500;Os01g0112000;Os01g0113200;Os…	0.0145924	5.23896	up
MSTRG.29740.1	Os05g0269500;Os05g0270200;Os05g0269200;Os05g0270850;Os05g0270000;Os05g0270500;Os05g0270800;Os05g0269000;Os05g0270400;Os05g0269100;Os05g0271300;Os05g0270875	CAA33958;Os01g0100466;Os01g0101850;Os01g0102000;Os01g0104500;Os01g0108500;Os01g0109700;Os01g0110200;Os01g0110400;Os01g0111500;Os01g0112500;Os01g0114600;Os01g0117000;Os01g0117100;Os01g0118000;Os01g0120600;Os01g0121500;Os01g0122534;Os01g0125850;Os01g0128200;Os01g0128250;Os01g0128400;Os01g0133500;Os01g0134900;Os01g0135800;Os01g0139200;Os01g0147800;Os01g0148050;Os01g0148200;Os01g0150500;Os01g0150950;…	0.0403857	4.29678	up
MSTRG.29800.1	Os05g0279400;Os05g0278550;Os05g0277500;Os05g0279300;Os05g0278500;Os05g0278950	CAA33956;Os01g0103650;Os01g0105800;Os01g0114600;Os01g0115100;Os01g0136850;Os01g0137950;Os01g0138000;Os01g0149350;Os01g0155600;Os01g0159400;Os01g0162200;Os01g0168100;Os01g0175700;Os01g0176700;Os01g0180300;Os01g0183633;Os01g0189800;Os01g0191500;Os01g0194600;Os01g0216000;Os01g0222500;Os01g0222600;Os01g0223200;Os01g0235200;Os01g0239150;Os01g0246500;Os01g0252100;Os01g0253300;Os01g0256900;Os01g0259200;…	0.0401111	4.06492	up
MSTRG.30282.1	Os05g0356800;Os05g0355300;Os05g0355700;Os05g0355400;Os05g0355900;Os05g0355200;Os05g0357100;Os05g0355133;Os05g0356700;Os05g0355800;Os05g0356600;Os05g0354400;Os05g0356201;Os05g0357200;Os05g0356500;Os05g0355500;Os05g0354300;Os05g0355450	CAA33927;Os01g0100466;Os01g0100900;Os01g0102000;Os01g0103650;Os01g0103900;Os01g0106900;Os01g0107900;Os01g0108000;Os01g0109700;Os01g0110100;Os01g0110200;Os01g0110400;Os01g0111200;Os01g0113400;Os01g0114600;Os01g0118000;Os01g0118300;Os01g0120700;Os01g0121600;Os01g0121800;Os01g0124000;Os01g0124600;Os01g0125500;Os01g0125800;Os01g0125900;Os01g0130000;Os01g0130400;Os01g0130500;Os01g0133400;Os01g0133500;…	0.00266281	4.90931	up
MSTRG.30444.1	Os05g0377150;Os05g0376400;Os05g0375700;Os05g0376800;Os05g0373700;Os05g0375850;Os05g0373900;Os05g0374932;Os05g0375600;Os05g0374600;Os05g0375532;Os05g0374500;Os05g0376200;Os05g0374200;Os05g0376300;Os05g0375100;Os05g0374000;Os05g0376000;Os05g0377000;Os05g0376600;Os05g0375400	BAC19875;CAA33986;CAA33987;Os01g0100700;Os01g0103075;Os01g0103100;Os01g0106400;Os01g0109201;Os01g0112100;Os01g0112600;Os01g0112800;Os01g0113150;Os01g0120800;Os01g0123500;Os01g0127000;Os01g0127400;Os01g0129600;Os01g0136000;Os01g0136100;Os01g0138100;Os01g0138232;Os01g0143300;Os01g0143350;Os01g0144600;Os01g0152951;Os01g0153550;Os01g0153950;Os01g0157600;Os01g0159000;Os01g0159200;Os01g0159800;Os01g016…	0.00442153	5.01338	up
MSTRG.3078.1	Os01g0626900;Os01g0624000;Os01g0626100;Os01g0622901;Os01g0623900;Os01g0623000;Os01g0623750;Os01g0626300;Os01g0625300;Os01g0623550;Os01g0624400;Os01g0626400;Os01g0626500;Os01g0623200;Os01g0627400;Os01g0627450;Os01g0624500;Os01g0624700;Os01g0622700;Os01g0622800;Os01g0625200;Os01g0623500;Os01g0625900;Os01g0623600;Os01g0626200	BAC19868;BAC19872;BAC19873;BAC19902;CAA33920;CAA33927;CAA33928;CAA33941;CAA33951;Os01g0100300;Os01g0100900;Os01g0101900;Os01g0102000;Os01g0103900;Os01g0107750;Os01g0107900;Os01g0108000;Os01g0108400;Os01g0108700;Os01g0109366;Os01g0109700;Os01g0110400;Os01g0110600;Os01g0111000;Os01g0111200;Os01g0112000;Os01g0113200;Os01g0113300;Os01g0113325;Os01g0113400;Os01g0113450;Os01g0113500;Os01g0113650;Os01g0…	0.000783564	7.31225	up
MSTRG.30784.1	Os05g0419000;Os05g0419050;Os05g0421450;Os05g0419500;Os05g0419800;Os05g0420500;Os05g0420300;Os05g0420200;Os05g0419200;Os05g0420000;Os05g0421900;Os05g0420600;Os05g0421300;Os05g0419100;Os05g0420900;Os05g0421600;Os05g0418800;Os05g0419600;Os05g0421100;Os05g0422200;Os05g0420750;Os05g0418901;Os05g0419301;Os05g0421000;Os05g0421750	Os01g0103650;Os01g0105800;Os01g0114600;Os01g0115100;Os01g0136850;Os01g0137950;Os01g0149350;Os01g0159400;Os01g0162200;Os01g0167400;Os01g0168100;Os01g0175700;Os01g0176700;Os01g0182200;Os01g0189800;Os01g0194600;Os01g0216000;Os01g0222500;Os01g0222600;Os01g0235200;Os01g0239150;Os01g0246500;Os01g0252100;Os01g0256900;Os01g0259200;Os01g0260700;Os01g0269000;Os01g0279200;Os01g0281000;Os01g0299801;Os01g0315…	0.00776374	4.86569	up
MSTRG.3087.1	Os01g0624400;Os01g0623550;Os01g0627916;Os01g0628000;Os01g0625300;Os01g0627900;Os01g0626400;Os01g0626500;Os01g0627550;Os01g0627400;Os01g0624000;Os01g0626900;Os01g0623900;Os01g0626100;Os01g0627500;Os01g0627701;Os01g0623750;Os01g0626300;Os01g0623500;Os01g0625200;Os01g0625900;Os01g0626200;Os01g0627800;Os01g0623600;Os01g0627967;Os01g0624700;Os01g0624500;Os01g0627450;Os01g0627933;Os01g0627600	CAA33938;CAA33956;Os01g0105800;Os01g0110200;Os01g0112500;Os01g0113350;Os01g0114600;Os01g0115100;Os01g0127300;Os01g0128400;Os01g0134900;Os01g0136850;Os01g0137950;Os01g0138000;Os01g0139200;Os01g0149350;Os01g0154600;Os01g0155600;Os01g0159000;Os01g0159400;Os01g0162200;Os01g0168100;Os01g0174300;Os01g0175700;Os01g0176300;Os01g0176700;Os01g0177200;Os01g0180300;Os01g0183633;Os01g0189800;Os01g0191500;Os01…	0.0312808	4.1606	up
MSTRG.31381.1	Os05g0498500;Os05g0499100;Os05g0498366;Os05g0498851;Os05g0501500;Os05g0498400;Os05g0499600;Os05g0498300;Os05g0501600;Os05g0500000;Os05g0501200;Os05g0499500;Os05g0499800;Os05g0498333;Os05g0498200;Os05g0501650;Os05g0501350;Os05g0500900;Os05g0501325;Os05g0500400;Os05g0499300;Os05g0500950;Os05g0501300;Os05g0500700;Os05g0500200;Os05g0501700;Os05g0500600;Os05g0500500;Os05g0498900;Os05g0500101;Os05g0499…	CAA33991;Os01g0100650;Os01g0102850;Os01g0103800;Os01g0105900;Os01g0106500;Os01g0116600;Os01g0123500;Os01g0127400;Os01g0127450;Os01g0138600;Os01g0143800;Os01g0144100;Os01g0147900;Os01g0150800;Os01g0162001;Os01g0166800;Os01g0168600;Os01g0178200;Os01g0191200;Os01g0205100;Os01g0206700;Os01g0218900;Os01g0219300;Os01g0221000;Os01g0221700;Os01g0224700;Os01g0229400;Os01g0235400;Os01g0237000;Os01g0238500;…	0.0312149	4.15841	up
MSTRG.31790.1	Os05g0550900;Os05g0551100;Os05g0550100;Os05g0549300;Os05g0549700;Os05g0550300;Os05g0550800;Os05g0550000;Os05g0551700;Os05g0551600;Os05g0552000;Os05g0550600;Os05g0551000;Os05g0551500;Os05g0549600;Os05g0550200;Os05g0551900;Os05g0549800;Os05g0551801;Os05g0551650;Os05g0549500;Os05g0550250;Os05g0549232;Os05g0549850;Os05g0551350;Os05g0549900	BAC19868;BAC19872;BAC19873;BAC19902;CAA33927;CAA33941;CAA33961;Os01g0100300;Os01g0100466;Os01g0100900;Os01g0101900;Os01g0102000;Os01g0103900;Os01g0104500;Os01g0107750;Os01g0107900;Os01g0108000;Os01g0108400;Os01g0109366;Os01g0109700;Os01g0110200;Os01g0110400;Os01g0110600;Os01g0111000;Os01g0111200;Os01g0112000;Os01g0113200;Os01g0113300;Os01g0113325;Os01g0113400;Os01g0113450;Os01g0113500;Os01g011370…	0.0423857	3.71852	up
MSTRG.31966.2	Os05g0569400;Os05g0569000;Os05g0568600;Os05g0569500;Os05g0569300;Os05g0569750;Os05g0571100;Os05g0571600;Os05g0570200;Os05g0568800;Os05g0570900;Os05g0570375;Os05g0572000;Os05g0571800;Os05g0570350;Os05g0571200;Os05g0569700;Os05g0569450;Os05g0571300;Os05g0571000;Os05g0569100;Os05g0569800;Os05g0570400;Os05g0569900;Os05g0571700;Os05g0571400;Os05g0569200;Os05g0568900	Os01g0114400;Os01g0115566;Os01g0116901;Os01g0117450;Os01g0117650;Os01g0117700;Os01g0126600;Os01g0136500;Os01g0151750;Os01g0153000;Os01g0153300;Os01g0175633;Os01g0180400;Os01g0216300;Os01g0216400;Os01g0231950;Os01g0236300;Os01g0243800;Os01g0248800;Os01g0263000;Os01g0281050;Os01g0290600;Os01g0297200;Os01g0326100;Os01g0346600;Os01g0357200;Os01g0374000;Os01g0388700;Os03g0279200;Os03g0320850;Os03g0327…	0.0131349	-3.99928	down
MSTRG.32110.1	Os05g0587200;Os05g0586600;Os05g0587350;Os05g0586400;Os05g0587100;Os05g0585400;Os05g0587700;Os05g0586700;Os05g0586900;Os05g0586800;Os05g0587000;Os05g0586500;Os05g0586200;Os05g0584750;Os05g0585800;Os05g0586050;Os05g0584600;Os05g0585900;Os05g0584950;Os05g0584900;Os05g0587300;Os05g0586300;Os05g0585601;Os05g0587400;Os05g0585700;Os05g0586350;Os05g0587600;Os05g0585500	CAA33909;Os01g0104600;Os01g0106900;Os01g0110200;Os01g0113350;Os01g0115600;Os01g0134900;Os01g0136600;Os01g0136850;Os01g0137950;Os01g0138000;Os01g0155500;Os01g0159400;Os01g0162900;Os01g0164600;Os01g0172100;Os01g0176300;Os01g0179600;Os01g0180850;Os01g0186700;Os01g0189800;Os01g0201200;Os01g0202500;Os01g0207500;Os01g0210500;Os01g0220200;Os01g0223000;Os01g0226600;Os01g0227500;Os01g0228400;Os01g0236300;…	0.0425804	-1.70158	down
MSTRG.32262.1	Os06g0101300;Os06g0101600;Os06g0101000;Os06g0100700;Os06g0100550;Os06g0101100	Os01g0103650;Os01g0105800;Os01g0115100;Os01g0117025;Os01g0136850;Os01g0137950;Os01g0149350;Os01g0159400;Os01g0162200;Os01g0167400;Os01g0168100;Os01g0175700;Os01g0176700;Os01g0182200;Os01g0186400;Os01g0189800;Os01g0194600;Os01g0216000;Os01g0222500;Os01g0222600;Os01g0235200;Os01g0239150;Os01g0246500;Os01g0252100;Os01g0256900;Os01g0260700;Os01g0269000;Os01g0299801;Os01g0315600;Os01g0355100;Os01g0357…	0.0340758	3.18651	up
MSTRG.32391.1	Os06g0113950;Os06g0114300;Os06g0114500;Os06g0114700;Os06g0116800;Os06g0116500;Os06g0117500;Os06g0117800;Os06g0116933;Os06g0114650;Os06g0115100;Os06g0115400;Os06g0114366;Os06g0115300;Os06g0114000;Os06g0114651;Os06g0116900;Os06g0115700;Os06g0116100;Os06g0115550;Os06g0115200;Os06g0115600;Os06g0114200;Os06g0115500;Os06g0117101;Os06g0115000;Os06g0118000;Os06g0114066;Os06g0114400;Os06g0114600;Os06g0114…	BAC19868;BAC19872;BAC19873;BAC19902;CAA33920;CAA33927;CAA33928;CAA33941;CAA33951;CAA33999;Os01g0100300;Os01g0100900;Os01g0101900;Os01g0102000;Os01g0103900;Os01g0107750;Os01g0107900;Os01g0108000;Os01g0108400;Os01g0108700;Os01g0109366;Os01g0109700;Os01g0110400;Os01g0110600;Os01g0111000;Os01g0111200;Os01g0112000;Os01g0113200;Os01g0113300;Os01g0113325;Os01g0113400;Os01g0113450;Os01g0113500;Os01g01136…	0.0318582	4.55909	up
MSTRG.32565.1	Os06g0134200;Os06g0133800;Os06g0134050;Os06g0133900;Os06g0136300;Os06g0136201;Os06g0133300;Os06g0132500;Os06g0132600;Os06g0132801;Os06g0132550;Os06g0135460;Os06g0133600;Os06g0134000;Os06g0134500;Os06g0133500;Os06g0136500;Os06g0134400;Os06g0134700;Os06g0136000;Os06g0134300;Os06g0134900;Os06g0133400;Os06g0134466;Os06g0132400;Os06g0136100;Os06g0135300;Os06g0133200;Os06g0135000;Os06g0135900;Os06g0134…	CAA33947;CAA33956;CAA33959;CAA33991;Os01g0105800;Os01g0105900;Os01g0127300;Os01g0128800;Os01g0147900;Os01g0162200;Os01g0168600;Os01g0175700;Os01g0178200;Os01g0180300;Os01g0181000;Os01g0192300;Os01g0194600;Os01g0205200;Os01g0221400;Os01g0222600;Os01g0229100;Os01g0263600;Os01g0274100;Os01g0281000;Os01g0284700;Os01g0309900;Os01g0326000;Os01g0367700;Os01g0382700;Os01g0387133;Os01g0506100;Os01g0507000…	0.029985	4.13737	up
MSTRG.33246.4	Os06g0223800;Os06g0223200;Os06g0224000;Os06g0221200;Os06g0221300;Os06g0222900;Os06g0222800;Os06g0221000;Os06g0223300;Os06g0223700;Os06g0221100;Os06g0222100;Os06g0222400	BAC19875;CAA33986;Os01g0100700;Os01g0104800;Os01g0106400;Os01g0108200;Os01g0109201;Os01g0112100;Os01g0112600;Os01g0112800;Os01g0113150;Os01g0120800;Os01g0123500;Os01g0127000;Os01g0127400;Os01g0129600;Os01g0136100;Os01g0138232;Os01g0143300;Os01g0143350;Os01g0147700;Os01g0152951;Os01g0153550;Os01g0153950;Os01g0157600;Os01g0159200;Os01g0159800;Os01g0162300;Os01g0164500;Os01g0166400;Os01g0167600;Os01…	0.0340656	2.81071	up
MSTRG.33389.2	Os06g0238700;Os06g0241400;Os06g0237950;Os06g0239600;Os06g0240001;Os06g0238200;Os06g0240800;Os06g0240400;Os06g0239400;Os06g0238600;Os06g0240700;Os06g0241100;Os06g0239200;Os06g0240600;Os06g0238000;Os06g0238900;Os06g0239500;Os06g0241200;Os06g0238300;Os06g0239000;Os06g0239100;Os06g0239700;Os06g0239300;Os06g0240050;Os06g0242000	BAC19875;BAC19895;CAA33956;CAA33974;CAA33991;CAA34005;CAA34006;Os01g0103075;Os01g0103100;Os01g0103800;Os01g0105900;Os01g0109201;Os01g0120800;Os01g0127300;Os01g0127400;Os01g0131450;Os01g0131600;Os01g0136000;Os01g0138100;Os01g0143350;Os01g0143800;Os01g0144600;Os01g0147900;Os01g0159000;Os01g0159800;Os01g0164500;Os01g0166300;Os01g0168600;Os01g0173100;Os01g0178200;Os01g0181000;Os01g0191100;Os01g019200…	0.0248334	2.04162	up
MSTRG.33743.1	Os06g0289200;Os06g0288300;Os06g0290701;Os06g0289300;Os06g0289900;Os06g0288100;Os06g0288400	BAC19868;BAC19872;BAC19873;BAC19902;CAA33920;CAA33927;CAA33928;CAA33941;CAA33951;Os01g0100300;Os01g0100900;Os01g0101900;Os01g0102000;Os01g0103900;Os01g0107750;Os01g0107900;Os01g0108000;Os01g0108400;Os01g0108700;Os01g0109366;Os01g0109700;Os01g0110400;Os01g0110600;Os01g0111000;Os01g0111200;Os01g0112000;Os01g0113200;Os01g0113300;Os01g0113325;Os01g0113400;Os01g0113450;Os01g0113500;Os01g0113650;Os01g0…	0.000335343	7.17603	up
MSTRG.33788.1	Os06g0295900;Os06g0295700;Os06g0296750;Os06g0295500;Os06g0297700;Os06g0294950;Os06g0297800;Os06g0296700;Os06g0296900;Os06g0296967;Os06g0296450;Os06g0296100;Os06g0295366;Os06g0295300;Os06g0297400;Os06g0297350;Os06g0297600;Os06g0297500;Os06g0295000;Os06g0297300	BAC19875;CAA33987;CAA34005;Os01g0100700;Os01g0103075;Os01g0103100;Os01g0103800;Os01g0105900;Os01g0106400;Os01g0109201;Os01g0120800;Os01g0123500;Os01g0127400;Os01g0129600;Os01g0136000;Os01g0138100;Os01g0143300;Os01g0143350;Os01g0143800;Os01g0144600;Os01g0152951;Os01g0159000;Os01g0159800;Os01g0164500;Os01g0166300;Os01g0166400;Os01g0167800;Os01g0168600;Os01g0168850;Os01g0171800;Os01g0172800;Os01g017…	0.0353826	4.05784	up
MSTRG.33984.1	Os06g0325500;Os06g0325700;Os06g0326500;Os06g0327400;Os06g0325602;Os06g0326900;Os06g0326000;Os06g0326700;Os06g0325900;Os06g0325350;Os06g0327300	BAC19868;BAC19872;BAC19902;CAA33920;CAA33927;CAA33941;Os01g0100466;Os01g0100900;Os01g0101850;Os01g0101900;Os01g0102000;Os01g0103650;Os01g0103900;Os01g0104500;Os01g0106900;Os01g0107750;Os01g0107900;Os01g0108000;Os01g0108400;Os01g0109366;Os01g0109700;Os01g0110100;Os01g0110200;Os01g0110400;Os01g0110600;Os01g0111200;Os01g0112000;Os01g0113300;Os01g0113325;Os01g0113400;Os01g0113450;Os01g0113500;Os01g01…	0.0461833	2.5707	up
MSTRG.34034.1	Os06g0335975;Os06g0335900;Os06g0337200;Os06g0335101;Os06g0335500;Os06g0334600;Os06g0336150;Os06g0334400;Os06g0336200;Os06g0336350;Os06g0336500;Os06g0334300	BAC19875;CAA33913;CAA33947;CAA33956;CAA34005;Os01g0103075;Os01g0103100;Os01g0106400;Os01g0120800;Os01g0127400;Os01g0128800;Os01g0136000;Os01g0144600;Os01g0159000;Os01g0159800;Os01g0164500;Os01g0166300;Os01g0166400;Os01g0167800;Os01g0168600;Os01g0168850;Os01g0173100;Os01g0178200;Os01g0180300;Os01g0183500;Os01g0191100;Os01g0192000;Os01g0192101;Os01g0192300;Os01g0195200;Os01g0200300;Os01g0200350;Os0…	0.000631571	3.1637	up
MSTRG.34131.1	Os06g0355500;Os06g0355150;Os06g0355800;Os06g0355300;Os06g0355701;Os06g0357000	BAC19868;BAC19872;BAC19873;BAC19902;CAA33920;CAA33927;CAA33928;CAA33941;CAA33951;CAA33999;Os01g0100300;Os01g0100900;Os01g0101900;Os01g0102000;Os01g0103900;Os01g0107750;Os01g0107900;Os01g0108000;Os01g0108400;Os01g0108700;Os01g0109366;Os01g0110400;Os01g0110600;Os01g0111000;Os01g0111200;Os01g0112000;Os01g0113200;Os01g0113300;Os01g0113325;Os01g0113400;Os01g0113450;Os01g0113500;Os01g0113650;Os01g01137…	0.00452134	5.50232	up
MSTRG.34233.15	Os06g0476200;Os06g0476500;Os06g0477400;Os06g0476900;Os06g0476400;Os06g0478600;Os06g0476150;Os06g0476100	Os01g0115566;Os01g0117025;Os01g0137950;Os01g0162500;Os01g0175600;Os01g0175700;Os01g0175733;Os01g0182200;Os01g0194600;Os01g0222600;Os01g0225300;Os01g0252100;Os01g0274100;Os01g0281000;Os01g0321900;Os01g0357150;Os01g0357400;Os01g0507000;Os01g0528800;Os03g0279200;Os03g0292600;Os03g0292700;Os03g0293450;Os03g0309200;Os03g0336900;Os03g0337550;Os03g0337600;Os03g0356470;Os03g0375933;Os03g0388300;Os03g0389…	0.0104577	-1.81206	down
MSTRG.34319.1	Os06g0490400;Os06g0487620;Os06g0488050;Os06g0487900;Os06g0489500;Os06g0489900;Os06g0488600;Os06g0489200;Os06g0490000;Os06g0488200;Os06g0488125;Os06g0490200;Os06g0487700	CAA33927;CAA33936;Os01g0103650;Os01g0103900;Os01g0111200;Os01g0118300;Os01g0124600;Os01g0125500;Os01g0136850;Os01g0147250;Os01g0147300;Os01g0149350;Os01g0164400;Os01g0167400;Os01g0169400;Os01g0172300;Os01g0179300;Os01g0180600;Os01g0180700;Os01g0182200;Os01g0183300;Os01g0210600;Os01g0215000;Os01g0216000;Os01g0222500;Os01g0225400;Os01g0235200;Os01g0239150;Os01g0243100;Os01g0243300;Os01g0246500;Os01…	0.0200796	4.7061	up
MSTRG.34337.1	Os06g0492300;Os06g0493001;Os06g0492750;Os06g0493700;Os06g0492101;Os06g0494250;Os06g0494100;Os06g0492700;Os06g0493900;Os06g0494000;Os06g0493800;Os06g0493100;Os06g0492800;Os06g0492900;Os06g0492000;Os06g0491800;Os06g0493600;Os06g0493801;Os06g0491566;Os06g0491300	CAA33938;Os01g0105800;Os01g0126000;Os01g0126200;Os01g0132100;Os01g0137250;Os01g0162200;Os01g0182900;Os01g0209800;Os01g0209901;Os01g0355100;Os01g0364800;Os01g0369200;Os01g0379101;Os01g0391600;Os01g0506100;Os01g0528300;Os03g0294800;Os03g0304500;Os03g0304800;Os03g0320600;Os03g0321900;Os03g0326500;Os03g0336300;Os03g0338700;Os03g0379400;Os03g0386800;Os03g0399800;Os03g0400200;Os03g0416300;Os03g0432666;…	0.0159594	-3.48875	down
MSTRG.34463.1		CAA33947;CAA33959;CAA33991;Os01g0105900;Os01g0143800;Os01g0147900;Os01g0168600;Os01g0178200;Os01g0181000;Os01g0191200;Os01g0194600;Os01g0205200;Os01g0222600;Os01g0229100;Os01g0237000;Os01g0284700;Os01g0309900;Os01g0326000;Os01g0382700;Os01g0387133;Os03g0273200;Os03g0285900;Os03g0292700;Os03g0292900;Os03g0294700;Os03g0298300;Os03g0319400;Os03g0342900;Os03g0375933;Os03g0385400;Os03g0409100;Os03g041…	0.0398726	3.98494	up
MSTRG.34483.1	Os06g0514100;Os06g0514700;Os06g0513781;Os06g0513943;Os06g0513862	Os01g0100466;Os01g0103650;Os01g0105800;Os01g0109700;Os01g0110200;Os01g0112500;Os01g0114600;Os01g0115100;Os01g0118000;Os01g0121800;Os01g0124600;Os01g0128250;Os01g0133500;Os01g0134900;Os01g0136850;Os01g0137950;Os01g0139200;Os01g0149350;Os01g0151600;Os01g0154600;Os01g0155600;Os01g0159400;Os01g0164400;Os01g0166100;Os01g0168100;Os01g0169400;Os01g0176300;Os01g0176700;Os01g0177200;Os01g0177900;Os01g0179…	0.0401111	4.06492	up
MSTRG.34719.3	Os06g0551000;Os06g0554100;Os06g0552300;Os06g0553200;Os06g0553550;Os06g0551800;Os06g0553001;Os06g0552400;Os06g0554200;Os06g0552700;Os06g0552800;Os06g0552900;Os06g0554300;Os06g0553700;Os06g0551500;Os06g0551400;Os06g0553800;Os06g0553100;Os06g0552000	BAC19868;BAC19872;BAC19902;CAA33927;Os01g0100900;Os01g0101900;Os01g0103650;Os01g0103900;Os01g0107750;Os01g0107900;Os01g0108000;Os01g0108400;Os01g0109366;Os01g0110100;Os01g0110600;Os01g0111200;Os01g0112000;Os01g0113200;Os01g0113325;Os01g0113400;Os01g0113450;Os01g0113500;Os01g0113700;Os01g0113800;Os01g0114100;Os01g0118300;Os01g0120700;Os01g0121600;Os01g0124000;Os01g0124100;Os01g0124200;Os01g0124401…	0.00442395	5.6492	up
MSTRG.35369.1	Os06g0646900;Os06g0649500;Os06g0647700;Os06g0650300;Os06g0649000;Os06g0649700;Os06g0647150;Os06g0646600;Os06g0647000;Os06g0647400;Os06g0649800;Os06g0646700;Os06g0649900;Os06g0647500;Os06g0647200;Os06g0648200;Os06g0650100;Os06g0646801;Os06g0648600;Os06g0648500;Os06g0647100;Os06g0647900;Os06g0647801	BAC19875;Os01g0103075;Os01g0103100;Os01g0105900;Os01g0106400;Os01g0120800;Os01g0127400;Os01g0128800;Os01g0136000;Os01g0143300;Os01g0143350;Os01g0143800;Os01g0159000;Os01g0159800;Os01g0164500;Os01g0166300;Os01g0166400;Os01g0167800;Os01g0168600;Os01g0168850;Os01g0171800;Os01g0172800;Os01g0178200;Os01g0180300;Os01g0191100;Os01g0192000;Os01g0192101;Os01g0192300;Os01g0195200;Os01g0200300;Os01g0200350;…	0.0215861	2.79877	up
MSTRG.35634.1	Os06g0684000;Os06g0684900;Os06g0686900;Os06g0687800;Os06g0686400;Os06g0687600;Os06g0687400;Os06g0688200;Os06g0686600;Os06g0685300;Os06g0687500;Os06g0686550;Os06g0687700;Os06g0687450;Os06g0685250;Os06g0685400;Os06g0685700;Os06g0687000;Os06g0685200;Os06g0684500;Os06g0688100;Os06g0687100;Os06g0686500;Os06g0685100;Os06g0687900;Os06g0687200	CAA33959;CAA33973;CAA33991;Os01g0100650;Os01g0102850;Os01g0105900;Os01g0127450;Os01g0144100;Os01g0162001;Os01g0191200;Os01g0219300;Os01g0221900;Os01g0229400;Os01g0237000;Os01g0238500;Os01g0259900;Os01g0284700;Os01g0293200;Os01g0343500;Os01g0346250;Os01g0371400;Os01g0510600;Os01g0514700;Os03g0279400;Os03g0294700;Os03g0309800;Os03g0312600;Os03g0313300;Os03g0342900;Os03g0355300;Os03g0390700;Os03g039…	0.000882875	2.68419	up
MSTRG.35776.1	Os06g0701400;Os06g0700700;Os06g0700550;Os06g0700100;Os06g0701900;Os06g0700300;Os06g0701200;Os06g0702000;Os06g0702400;Os06g0701100;Os06g0701700;Os06g0701600;Os06g0701300;Os06g0700000;Os06g0700750;Os06g0700500;Os06g0700601;Os06g0702100;Os06g0702200	BAC19875;BAC19898;CAA33947;CAA33956;CAA34005;CAA34006;Os01g0103075;Os01g0103100;Os01g0106400;Os01g0120800;Os01g0127300;Os01g0127400;Os01g0128200;Os01g0128800;Os01g0131450;Os01g0136000;Os01g0144600;Os01g0159000;Os01g0159800;Os01g0166300;Os01g0166400;Os01g0167800;Os01g0168600;Os01g0168850;Os01g0173100;Os01g0174300;Os01g0175700;Os01g0178200;Os01g0180300;Os01g0183500;Os01g0191100;Os01g0192000;Os01g01…	0.026524	4.20294	up
MSTRG.36064.2	Os07g0102150;Os07g0100200;Os07g0100900;Os07g0100500;Os07g0102100;Os07g0101000;Os07g0100800;Os07g0101800;Os07g0102400;Os07g0101200;Os07g0101101;Os07g0102200;Os07g0101400;Os07g0101300;Os07g0100300;Os07g0100600;Os07g0102300;Os07g0102000;Os07g0102500;Os07g0101500	Os01g0100700;Os01g0106400;Os01g0112100;Os01g0112600;Os01g0112800;Os01g0113150;Os01g0127000;Os01g0136100;Os01g0147700;Os01g0152951;Os01g0153550;Os01g0153950;Os01g0154250;Os01g0157600;Os01g0159200;Os01g0162300;Os01g0167600;Os01g0176400;Os01g0181300;Os01g0185000;Os01g0189100;Os01g0200300;Os01g0206200;Os01g0207900;Os01g0208000;Os01g0214001;Os01g0232450;Os01g0233850;Os01g0237366;Os01g0242800;Os01g0250…	0.0210813	5.97083	up
MSTRG.36168.1	Os07g0112300;Os07g0112351;Os07g0114000;Os07g0114500;Os07g0112400;Os07g0113000;Os07g0113100;Os07g0115200;Os07g0113101;Os07g0112700;Os07g0112800;Os07g0115500;Os07g0112600;Os07g0113700;Os07g0113500;Os07g0115300;Os07g0115720;Os07g0114550;Os07g0111900;Os07g0111800;Os07g0114400;Os07g0112000;Os07g0115700;Os07g0113600;Os07g0113300;Os07g0113200;Os07g0114300;Os07g0112100;Os07g0115600;Os07g0115350	CAA33959;CAA33973;Os01g0102400;Os01g0102850;Os01g0127450;Os01g0137266;Os01g0162500;Os01g0233800;Os01g0237000;Os01g0251000;Os01g0263400;Os03g0281900;Os03g0308850;Os03g0401333;Os03g0411800;Os03g0415750;Os03g0616400;Os03g0629450;Os03g0633500;Os03g0664400;Os03g0689833;Os03g0722000;Os03g0765100;Os03g0781400;Os03g0793800;Os03g0835700;Os04g0116900;Os04g0163800;Os04g0309600;Os04g0310400;Os04g0337800;Os04…	0.0290182	4.25948	up
MSTRG.36461.1	Os07g0160400;Os07g0161600;Os07g0160300;Os07g0160800;Os07g0162400;Os07g0161700;Os07g0162100;Os07g0162500;Os07g0162300;Os07g0160000;Os07g0161500;Os07g0159600;Os07g0162200;Os07g0159900;Os07g0161000;Os07g0162600;Os07g0159500;Os07g0159800;Os07g0160600;Os07g0159200;Os07g0161650;Os07g0162450;Os07g0159550;Os07g0162900;Os07g0162700;Os07g0160100;Os07g0160500;Os07g0159700;Os07g0160050	Os01g0115100;Os01g0115566;Os01g0128800;Os01g0137550;Os01g0137950;Os01g0175600;Os01g0175633;Os01g0175700;Os01g0175733;Os01g0176700;Os01g0180300;Os01g0194600;Os01g0201200;Os01g0222600;Os01g0223000;Os01g0252100;Os01g0266800;Os01g0274100;Os01g0281000;Os01g0321900;Os01g0323000;Os01g0332800;Os01g0357100;Os01g0357150;Os01g0507000;Os01g0512200;Os01g0520340;Os01g0528800;Os01g0532700;Os03g0279200;Os03g0292…	0.000134587	-2.75529	down
MSTRG.36465.1	Os07g0162500;Os07g0162100;Os07g0162300;Os07g0160000;Os07g0161700;Os07g0162400;Os07g0160300;Os07g0160800;Os07g0160400;Os07g0161600;Os07g0159900;Os07g0161000;Os07g0159500;Os07g0162600;Os07g0163066;Os07g0162200;Os07g0159600;Os07g0161500;Os07g0163000;Os07g0162450;Os07g0161650;Os07g0159800;Os07g0160600;Os07g0159700;Os07g0160050;Os07g0160100;Os07g0160500;Os07g0162700;Os07g0163200;Os07g0162900;Os07g0159…	CAA33908;CAA33920;CAA33941;Os01g0100466;Os01g0100900;Os01g0101850;Os01g0102000;Os01g0103900;Os01g0104500;Os01g0106900;Os01g0107900;Os01g0108000;Os01g0109700;Os01g0110200;Os01g0110400;Os01g0111200;Os01g0111500;Os01g0112500;Os01g0113400;Os01g0114600;Os01g0116250;Os01g0117000;Os01g0117100;Os01g0118000;Os01g0118300;Os01g0120600;Os01g0120700;Os01g0121600;Os01g0121800;Os01g0122534;Os01g0124000;Os01g012…	0.0410448	4.34433	up
MSTRG.36804.1	Os07g0211101;Os07g0209401;Os07g0209800;Os07g0210000;Os07g0211400;Os07g0210800;Os07g0210100;Os07g0211700;Os07g0209600;Os07g0211200;Os07g0209500;Os07g0211000;Os07g0211500;Os07g0209700	CAA33959;CAA33973;Os01g0102400;Os01g0117025;Os01g0137266;Os01g0138800;Os01g0152687;Os01g0162500;Os01g0186400;Os01g0233800;Os01g0251000;Os01g0253800;Os01g0278100;Os01g0337160;Os01g0357400;Os01g0509800;Os03g0277600;Os03g0281900;Os03g0308850;Os03g0383900;Os03g0411800;Os03g0640800;Os03g0643611;Os03g0664400;Os03g0689833;Os03g0793800;Os03g0793900;Os03g0821350;Os03g0835700;Os03g0841600;Os04g0116900;Os04…	0.0307999	4.3069	up
MSTRG.37022.1	Os07g0250900;Os07g0252300;Os07g0253100;Os07g0252800;Os07g0253000;Os07g0251200;Os07g0252000;Os07g0252200;Os07g0251301;Os07g0251900;Os07g0252400;Os07g0250501;Os07g0251500	BAC19868;BAC19872;BAC19873;BAC19902;CAA33920;CAA33927;CAA33928;CAA33941;CAA33951;CAA33961;Os01g0100300;Os01g0100466;Os01g0100900;Os01g0101850;Os01g0101900;Os01g0102000;Os01g0103900;Os01g0104500;Os01g0106900;Os01g0107750;Os01g0107900;Os01g0108000;Os01g0108400;Os01g0108700;Os01g0109366;Os01g0109700;Os01g0110200;Os01g0110400;Os01g0110600;Os01g0111000;Os01g0111200;Os01g0112000;Os01g0113200;Os01g01133…	0.0392692	3.08513	up
MSTRG.37041.2	Os07g0255200;Os07g0255300	CAA33981;CAA33990;CAA33994;CAA33995;CAA34001;CAA34014;Os01g0114000;Os01g0117400;Os01g0136800;Os01g0145200;Os01g0145600;Os01g0148000;Os01g0149500;Os01g0149750;Os01g0151700;Os01g0174900;Os01g0188525;Os01g0226200;Os01g0260000;Os01g0296166;Os01g0308700;Os03g0276300;Os03g0277100;Os03g0311000;Os03g0352500;Os03g0355100;Os03g0361100;Os03g0378000;Os03g0416350;Os03g0421300;Os03g0619600;Os03g0620800;Os03g06…	0.0414038	-2.08537	down
MSTRG.37041.3	Os07g0255300;Os07g0255200	BAC19884;CAA33972;CAA33982;CAA33985;CAA33995;CAA34001;CAA34014;Os01g0106200;Os01g0114000;Os01g0121100;Os01g0144200;Os01g0145200;Os01g0145600;Os01g0148000;Os01g0149500;Os01g0149750;Os01g0151700;Os01g0179200;Os01g0221600;Os01g0226200;Os01g0260000;Os01g0267400;Os01g0296166;Os01g0308700;Os01g0383100;Os01g0495701;Os01g0533000;Os03g0277100;Os03g0310900;Os03g0311000;Os03g0352500;Os03g0361100;Os03g037800…	0.0152689	-6.70323	down
MSTRG.37132.2	Os07g0269800;Os07g0268800	CAA33956;CAA34011;Os01g0105800;Os01g0115725;Os01g0121300;Os01g0126401;Os01g0127300;Os01g0131600;Os01g0142300;Os01g0147900;Os01g0152000;Os01g0158900;Os01g0168100;Os01g0175700;Os01g0175733;Os01g0176700;Os01g0179800;Os01g0180300;Os01g0181000;Os01g0232800;Os01g0239100;Os01g0263600;Os01g0266800;Os01g0269100;Os01g0277100;Os01g0309900;Os01g0316600;Os01g0332200;Os01g0332500;Os01g0332800;Os01g0363900;Os01…	0.010969	-4.24951	down
MSTRG.37152.2	Os07g0271700;Os07g0271000;Os07g0269800;Os07g0270301;Os07g0271600;Os07g0271550;Os07g0271500;Os07g0270950;Os07g0270800;Os07g0270900	BAC19875;CAA33947;CAA33956;CAA33959;CAA33991;Os01g0103800;Os01g0105900;Os01g0127400;Os01g0143800;Os01g0147900;Os01g0166300;Os01g0168600;Os01g0178200;Os01g0191200;Os01g0192300;Os01g0200500;Os01g0205200;Os01g0218900;Os01g0221000;Os01g0229100;Os01g0237000;Os01g0241000;Os01g0247500;Os01g0259900;Os01g0263600;Os01g0266000;Os01g0276000;Os01g0284700;Os01g0293200;Os01g0306800;Os01g0309900;Os01g0318000;Os0…	8.80519e-05	6.17099	up
MSTRG.37252.1	Os07g0294600;Os07g0294300;Os07g0293000;Os07g0291300;Os07g0292100;Os07g0291400;Os07g0294100;Os07g0291750;Os07g0291200;Os07g0292800	BAC19875;CAA33974;CAA33986;CAA33987;Os01g0100700;Os01g0103075;Os01g0103800;Os01g0104800;Os01g0105900;Os01g0106400;Os01g0106500;Os01g0108200;Os01g0109201;Os01g0112100;Os01g0120800;Os01g0123500;Os01g0127400;Os01g0129600;Os01g0136000;Os01g0138100;Os01g0143300;Os01g0143350;Os01g0143800;Os01g0152951;Os01g0159800;Os01g0162001;Os01g0164500;Os01g0166300;Os01g0167800;Os01g0168300;Os01g0168600;Os01g0171800…	0.00795514	4.31546	up
MSTRG.37520.1	Os07g0439750;Os07g0439000;Os07g0438600;Os07g0438700;Os07g0440900;Os07g0438550;Os07g0442000;Os07g0438800;Os07g0439100;Os07g0440700;Os07g0440100	CAA33938;CAA33956;CAA33991;Os01g0105800;Os01g0115100;Os01g0127300;Os01g0128800;Os01g0136850;Os01g0137950;Os01g0138000;Os01g0159400;Os01g0162200;Os01g0168100;Os01g0175700;Os01g0176700;Os01g0180300;Os01g0183633;Os01g0189800;Os01g0191500;Os01g0194600;Os01g0205200;Os01g0222600;Os01g0252100;Os01g0259200;Os01g0260700;Os01g0263600;Os01g0269100;Os01g0274100;Os01g0279200;Os01g0281000;Os01g0299801;Os01g031…	0.00707126	4.83283	up
MSTRG.37632.6	Os07g0464001;Os07g0466200;Os07g0464600;Os07g0464200;Os07g0466000;Os07g0464700;Os07g0466300	CAA34010;Os01g0115725;Os01g0121300;Os01g0128700;Os01g0137550;Os01g0142300;Os01g0145200;Os01g0305900;Os03g0322600;Os03g0399950;Os03g0401951;Os03g0416350;Os03g0418600;Os03g0603300;Os03g0655850;Os03g0657400;Os03g0729900;Os03g0759250;Os03g0786400;Os03g0836500;Os03g0844100;Os04g0112100;Os04g0226800;Os04g0298066;Os04g0376700;Os04g0408600;Os04g0477100;Os04g0504000;Os04g0507016;Os04g0513200;Os04g0514900;…	0.0335416	-2.18297	down
MSTRG.37871.1	Os07g0500951;Os07g0500800;Os07g0498400;Os07g0499650;Os07g0499800;Os07g0499500;Os07g0498800;Os07g0498900;Os07g0499300;Os07g0499900;Os07g0500300;Os07g0498300	BAC19875;CAA33913;CAA33947;CAA33987;CAA33991;Os01g0103075;Os01g0103800;Os01g0105900;Os01g0106400;Os01g0106500;Os01g0108200;Os01g0109201;Os01g0120800;Os01g0123500;Os01g0127400;Os01g0129600;Os01g0136000;Os01g0138100;Os01g0143300;Os01g0143350;Os01g0143800;Os01g0147900;Os01g0159800;Os01g0162001;Os01g0164500;Os01g0166300;Os01g0167800;Os01g0168600;Os01g0168850;Os01g0171800;Os01g0173100;Os01g0178200;Os0…	0.0153787	4.454	up
MSTRG.38418.1	Os07g0570300;Os07g0571800;Os07g0572075;Os07g0572000;Os07g0569700;Os07g0569500;Os07g0570500;Os07g0571500;Os07g0571700;Os07g0572050;Os07g0571200;Os07g0571100;Os07g0570600;Os07g0570550;Os07g0569550;Os07g0570100;Os07g0570700;Os07g0571000;Os07g0571300;Os07g0571600;Os07g0569600;Os07g0571900;Os07g0569800	CAA33920;CAA33941;Os01g0100466;Os01g0101850;Os01g0102000;Os01g0104500;Os01g0106900;Os01g0108500;Os01g0109700;Os01g0110200;Os01g0110400;Os01g0111500;Os01g0114600;Os01g0117100;Os01g0118000;Os01g0120600;Os01g0121500;Os01g0121600;Os01g0122534;Os01g0124600;Os01g0125850;Os01g0125900;Os01g0127100;Os01g0128250;Os01g0130500;Os01g0133500;Os01g0134900;Os01g0135800;Os01g0136900;Os01g0139200;Os01g0147800;Os01…	0.0230279	2.0047	up
MSTRG.38893.2	Os07g0633800;Os07g0633000;Os07g0633600;Os07g0632800;Os07g0634300;Os07g0634100;Os07g0631050;Os07g0634600;Os07g0631700;Os07g0633500;Os07g0631500;Os07g0633450;Os07g0632000;Os07g0631200;Os07g0633400;Os07g0632700;Os07g0631950;Os07g0634900;Os07g0632600;Os07g0631300;Os07g0631100;Os07g0631900;Os07g0633300;Os07g0633200;Os07g0634400;Os07g0633100;Os07g0634000;Os07g0634200	Os01g0113350;Os01g0115566;Os01g0128800;Os01g0137950;Os01g0138000;Os01g0175600;Os01g0175700;Os01g0179600;Os01g0180300;Os01g0180400;Os01g0194600;Os01g0201200;Os01g0216300;Os01g0220200;Os01g0221400;Os01g0222600;Os01g0223000;Os01g0227300;Os01g0236300;Os01g0267800;Os01g0274100;Os01g0281000;Os01g0299700;Os01g0321900;Os01g0327500;Os01g0347000;Os01g0357100;Os01g0357150;Os01g0383700;Os01g0507000;Os01g0528…	0.010348	-4.75524	down
MSTRG.3901.1	Os01g0727500;Os01g0729400;Os01g0726100;Os01g0727700;Os01g0729100;Os01g0725600;Os01g0727100;Os01g0727820;Os01g0727200;Os01g0728400;Os01g0728100;Os01g0728250;Os01g0728000;Os01g0726700;Os01g0729200;Os01g0728375;Os01g0728150;Os01g0729700;Os01g0727840;Os01g0727400;Os01g0729900;Os01g0727600;Os01g0726400;Os01g0727900;Os01g0727800;Os01g0726001;Os01g0729500;Os01g0728300;Os01g0728325;Os01g0729950;Os01g0728…	CAA33927;Os01g0100466;Os01g0103650;Os01g0103900;Os01g0107900;Os01g0108000;Os01g0110100;Os01g0111200;Os01g0114600;Os01g0118300;Os01g0124600;Os01g0125500;Os01g0125900;Os01g0133500;Os01g0134900;Os01g0136600;Os01g0136850;Os01g0147250;Os01g0147300;Os01g0149350;Os01g0164400;Os01g0166100;Os01g0166200;Os01g0167400;Os01g0167700;Os01g0169400;Os01g0172200;Os01g0172300;Os01g0179300;Os01g0180600;Os01g0180700;…	0.00274935	5.54259	up
MSTRG.39058.9	Os07g0653100;Os07g0654450;Os07g0656050;Os07g0656100;Os07g0655300;Os07g0655800;Os07g0653000;Os07g0654500;Os07g0654300;Os07g0655900;Os07g0653800;Os07g0655201;Os07g0656000;Os07g0655600;Os07g0653300;Os07g0654100;Os07g0655500;Os07g0654700;Os07g0655400;Os07g0653050;Os07g0653900;Os07g0654800	CAA33964;Os01g0126200;Os01g0137250;Os01g0170300;Os01g0171000;Os01g0192600;Os01g0207400;Os01g0211800;Os01g0248701;Os01g0272650;Os01g0290700;Os01g0294700;Os01g0296700;Os01g0312600;Os01g0313300;Os01g0364800;Os01g0369200;Os01g0513850;Os03g0302800;Os03g0304500;Os03g0311600;Os03g0333400;Os03g0379400;Os03g0605300;Os03g0637800;Os03g0637900;Os03g0638000;Os03g0659266;Os03g0661300;Os03g0736300;Os03g0749500;…	0.0151783	-3.52114	down
MSTRG.39213.1	Os07g0673100;Os07g0671901;Os07g0672300;Os07g0669800;Os07g0672566;Os07g0673000;Os07g0669401;Os07g0669650;Os07g0670100;Os07g0671000;Os07g0669600;Os07g0671100;Os07g0673400;Os07g0672600;Os07g0672175;Os07g0671301;Os07g0669700;Os07g0671700;Os07g0673200;Os07g0671400;Os07g0672700;Os07g0672500;Os07g0669100;Os07g0671500;Os07g0669675;Os07g0670200;Os07g0669250;Os07g0670800;Os07g0670000;Os07g0671800;Os07g0670…	CAA33956;CAA34011;Os01g0102500;Os01g0105800;Os01g0106800;Os01g0112500;Os01g0115100;Os01g0126401;Os01g0127300;Os01g0128400;Os01g0131450;Os01g0131600;Os01g0142300;Os01g0147900;Os01g0152000;Os01g0153400;Os01g0158900;Os01g0162200;Os01g0168100;Os01g0169800;Os01g0174300;Os01g0176700;Os01g0181000;Os01g0191500;Os01g0192101;Os01g0223200;Os01g0232800;Os01g0239100;Os01g0246100;Os01g0253300;Os01g0263600;Os01…	0.000244607	-2.98548	down
MSTRG.40205.1	Os08g0207300;Os08g0206800;Os08g0209000;Os08g0207000;Os08g0207401;Os08g0207500;Os08g0207800;Os08g0208700;Os08g0207600;Os08g0208300;Os08g0206466;Os08g0206700;Os08g0207951;Os08g0208400;Os08g0206650;Os08g0206900;Os08g0206400;Os08g0208200;Os08g0206500;Os08g0206950;Os08g0206600	BAC19875;CAA33913;CAA33947;CAA33991;Os01g0103075;Os01g0103800;Os01g0105900;Os01g0123500;Os01g0127400;Os01g0143350;Os01g0143800;Os01g0147900;Os01g0162001;Os01g0164500;Os01g0166300;Os01g0168600;Os01g0171800;Os01g0178200;Os01g0191200;Os01g0192300;Os01g0200350;Os01g0200500;Os01g0205200;Os01g0218800;Os01g0218900;Os01g0221000;Os01g0229100;Os01g0235400;Os01g0237000;Os01g0241000;Os01g0241100;Os01g0247500…	0.000343333	5.79578	up
MSTRG.40564.1	Os08g0265300;Os08g0266300;Os08g0266225;Os08g0263100;Os08g0266200;Os08g0266600;Os08g0264700;Os08g0265500;Os08g0266400;Os08g0263400;Os08g0263600;Os08g0263300	CAA33924;CAA33973;Os01g0100650;Os01g0102850;Os01g0127450;Os01g0197400;Os01g0218500;Os01g0221900;Os01g0229400;Os01g0234001;Os01g0237000;Os01g0263400;Os01g0286550;Os01g0291500;Os01g0343500;Os01g0371400;Os01g0508500;Os01g0510600;Os01g0530366;Os03g0281900;Os03g0302000;Os03g0355300;Os03g0371400;Os03g0385100;Os03g0390700;Os03g0392400;Os03g0401333;Os03g0411800;Os03g0415351;Os03g0415750;Os03g0428800;Os03…	0.00476457	6.59359	up
MSTRG.40564.2	Os08g0266225;Os08g0263100;Os08g0266200;Os08g0266600;Os08g0265300;Os08g0266300;Os08g0265500;Os08g0263300;Os08g0266400;Os08g0263400;Os08g0263600;Os08g0264700	CAA33913;Os01g0108800;Os01g0113350;Os01g0138000;Os01g0155000;Os01g0155500;Os01g0179600;Os01g0180400;Os01g0201250;Os01g0210800;Os01g0220200;Os01g0221400;Os01g0227300;Os01g0267800;Os01g0299700;Os01g0347000;Os01g0352200;Os01g0357100;Os01g0379101;Os01g0383700;Os01g0384300;Os01g0505500;Os03g0285900;Os03g0295300;Os03g0297600;Os03g0302500;Os03g0305050;Os03g0305800;Os03g0310701;Os03g0337700;Os03g0342100;…	0.0130116	-2.10042	down
MSTRG.40565.4	Os08g0264700;Os08g0265500;Os08g0266400;Os08g0263600;Os08g0265300;Os08g0266700;Os08g0266300;Os08g0265000;Os08g0266200;Os08g0266225;Os08g0266600	BAC19853;CAA33917;Os01g0108800;Os01g0115200;Os01g0132100;Os01g0134500;Os01g0150200;Os01g0177100;Os01g0179500;Os01g0197500;Os01g0209800;Os01g0209901;Os01g0223600;Os01g0228600;Os01g0317500;Os01g0356400;Os01g0383700;Os01g0384300;Os01g0515300;Os01g0520600;Os01g0524500;Os01g0527900;Os03g0281000;Os03g0294800;Os03g0295700;Os03g0295932;Os03g0297000;Os03g0305800;Os03g0320100;Os03g0370200;Os03g0399800;Os03…	0.0345781	-1.71686	down
MSTRG.40693.4	Os08g0290500;Os08g0290100;Os08g0289266;Os08g0290400;Os08g0290200;Os08g0290900;Os08g0290700;Os08g0290000;Os08g0289400	BAC19884;CAA33972;CAA33982;CAA34001;CAA34014;Os01g0106200;Os01g0114000;Os01g0121100;Os01g0144200;Os01g0145200;Os01g0145600;Os01g0148000;Os01g0149500;Os01g0149750;Os01g0151700;Os01g0178900;Os01g0179200;Os01g0221600;Os01g0226200;Os01g0260000;Os01g0267400;Os01g0296166;Os01g0308700;Os01g0383100;Os01g0495701;Os01g0533000;Os03g0277100;Os03g0310900;Os03g0311000;Os03g0352500;Os03g0361100;Os03g0378000;Os0…	0.021035	-4.44272	down
MSTRG.40794.3	Os08g0304900;Os08g0305100;Os08g0305300;Os08g0305000	Os01g0100700;Os01g0106400;Os01g0112600;Os01g0112800;Os01g0113150;Os01g0120800;Os01g0127000;Os01g0136000;Os01g0136100;Os01g0136200;Os01g0138232;Os01g0152100;Os01g0152951;Os01g0153550;Os01g0153950;Os01g0154250;Os01g0157600;Os01g0159200;Os01g0159800;Os01g0162300;Os01g0166400;Os01g0167800;Os01g0168850;Os01g0176400;Os01g0176900;Os01g0181300;Os01g0183500;Os01g0189100;Os01g0191100;Os01g0200300;Os01g0200…	0.00798537	5.09211	up
MSTRG.40822.2	Os08g0309300;Os08g0310500;Os08g0310100	Os01g0113350;Os01g0115566;Os01g0128800;Os01g0137950;Os01g0175600;Os01g0175633;Os01g0175700;Os01g0179600;Os01g0180300;Os01g0180400;Os01g0194600;Os01g0201200;Os01g0216300;Os01g0220200;Os01g0221400;Os01g0222600;Os01g0223000;Os01g0236300;Os01g0267800;Os01g0274100;Os01g0281000;Os01g0299700;Os01g0321900;Os01g0327500;Os01g0347000;Os01g0357100;Os01g0357150;Os01g0507000;Os01g0528800;Os03g0279200;Os03g0285…	4.13381e-06	-7.17039	down
MSTRG.41000.1	Os08g0334300;Os08g0335600;Os08g0334250;Os08g0334701;Os08g0335500;Os08g0334900;Os08g0335000;Os08g0335200	CAA33927;CAA33936;Os01g0103650;Os01g0103900;Os01g0111200;Os01g0118300;Os01g0124600;Os01g0125500;Os01g0145000;Os01g0147250;Os01g0147300;Os01g0149350;Os01g0164800;Os01g0167400;Os01g0167700;Os01g0169400;Os01g0172300;Os01g0179300;Os01g0180600;Os01g0180700;Os01g0182200;Os01g0210600;Os01g0215000;Os01g0216000;Os01g0222500;Os01g0222700;Os01g0225400;Os01g0235200;Os01g0243100;Os01g0243300;Os01g0261000;Os01…	0.004501	5.53019	up
MSTRG.41126.1	Os08g0356700;Os08g0357300;Os08g0355500;Os08g0357100;Os08g0357000;Os08g0357700;Os08g0356500;Os08g0356800;Os08g0356001	BAC19868;BAC19872;BAC19873;BAC19902;CAA33920;CAA33927;CAA33928;CAA33941;CAA33951;Os01g0100300;Os01g0100900;Os01g0101900;Os01g0102000;Os01g0103900;Os01g0107750;Os01g0107900;Os01g0108000;Os01g0108400;Os01g0108700;Os01g0109366;Os01g0109700;Os01g0110400;Os01g0110600;Os01g0111000;Os01g0111200;Os01g0112000;Os01g0113200;Os01g0113300;Os01g0113325;Os01g0113400;Os01g0113450;Os01g0113500;Os01g0113650;Os01g0…	0.00273893	6.62417	up
MSTRG.41127.1	Os08g0357100;Os08g0357000;Os08g0357700;Os08g0356500;Os08g0356800;Os08g0356001;Os08g0356700;Os08g0357300	BAC19868;BAC19872;BAC19902;CAA33927;CAA33941;Os01g0100466;Os01g0100900;Os01g0101850;Os01g0102000;Os01g0103650;Os01g0103900;Os01g0104500;Os01g0106900;Os01g0107750;Os01g0107900;Os01g0108000;Os01g0108400;Os01g0109366;Os01g0109700;Os01g0110100;Os01g0110200;Os01g0110400;Os01g0110600;Os01g0111200;Os01g0112000;Os01g0113300;Os01g0113325;Os01g0113400;Os01g0113450;Os01g0113500;Os01g0113700;Os01g0113800;Os0…	0.0107457	3.34339	up
MSTRG.41149.1	Os08g0359400;Os08g0359300;Os08g0359050;Os08g0360700;Os08g0359900;Os08g0360800;Os08g0359600;Os08g0358800;Os08g0360150;Os08g0360100;Os08g0359100;Os08g0359500;Os08g0359200;Os08g0360200;Os08g0359000;Os08g0361000;Os08g0360000;Os08g0360300;Os08g0361300;Os08g0360400	Os01g0103650;Os01g0105800;Os01g0117025;Os01g0136850;Os01g0137950;Os01g0149350;Os01g0167400;Os01g0168100;Os01g0182200;Os01g0186400;Os01g0189800;Os01g0194600;Os01g0216000;Os01g0222500;Os01g0222600;Os01g0239150;Os01g0252100;Os01g0269000;Os01g0299801;Os01g0315600;Os01g0355100;Os01g0357400;Os01g0391600;Os01g0506100;Os01g0507000;Os01g0520340;Os01g0530300;Os01g0531500;Os03g0292600;Os03g0292700;Os03g0293…	0.0255234	4.32279	up
MSTRG.41603.1	Os08g0434201;Os08g0433600;Os08g0433400;Os08g0433500;Os08g0434500;Os08g0434000;Os08g0433200;Os08g0433000;Os08g0433300;Os08g0434632;Os08g0434150;Os08g0432800;Os08g0433100;Os08g0434300;Os08g0434566;Os08g0433050;Os08g0434700;Os08g0433350;Os08g0434100	CAA33938;CAA33947;CAA33956;CAA33991;CAA34006;Os01g0105800;Os01g0105900;Os01g0127300;Os01g0128800;Os01g0136000;Os01g0138000;Os01g0147900;Os01g0159000;Os01g0162200;Os01g0166300;Os01g0168100;Os01g0168600;Os01g0175700;Os01g0178200;Os01g0180300;Os01g0192000;Os01g0192101;Os01g0192300;Os01g0194600;Os01g0205200;Os01g0205500;Os01g0221400;Os01g0222600;Os01g0229100;Os01g0241000;Os01g0252100;Os01g0263600;Os0…	0.0102287	1.48076	up
MSTRG.42134.1	Os08g0508500;Os08g0508800;Os08g0508600;Os08g0506400;Os08g0506700;Os08g0507200;Os08g0508100;Os08g0506350;Os08g0506500;Os08g0507702;Os08g0508700;Os08g0506850;Os08g0508000;Os08g0507100;Os08g0507701;Os08g0507000	BAC19875;Os01g0100700;Os01g0103075;Os01g0104800;Os01g0106400;Os01g0108200;Os01g0109201;Os01g0112100;Os01g0112600;Os01g0112800;Os01g0113150;Os01g0120800;Os01g0123500;Os01g0127000;Os01g0127400;Os01g0129600;Os01g0136000;Os01g0136100;Os01g0138100;Os01g0138232;Os01g0143300;Os01g0143350;Os01g0147700;Os01g0152951;Os01g0153550;Os01g0153950;Os01g0157600;Os01g0159200;Os01g0159800;Os01g0162300;Os01g0164500;…	0.0023498	3.00597	up
MSTRG.42160.3	Os08g0509500;Os08g0511700;Os08g0511200;Os08g0512801;Os08g0511900;Os08g0510750;Os08g0512900;Os08g0513100;Os08g0509400;Os08g0511000;Os08g0512500;Os08g0510400;Os08g0509200;Os08g0511400;Os08g0510800;Os08g0512600;Os08g0512300;Os08g0509600;Os08g0511500;Os08g0509450;Os08g0510700;Os08g0510300;Os08g0511600;Os08g0509300;Os08g0512400;Os08g0512100;Os08g0511800;Os08g0513051;Os08g0510500;Os08g0512700;Os08g0513…	CAA33959;CAA33973;Os01g0102400;Os01g0127450;Os01g0137266;Os01g0152687;Os01g0162500;Os01g0233800;Os01g0237000;Os01g0251000;Os01g0263400;Os01g0357400;Os01g0387133;Os01g0509800;Os03g0281900;Os03g0308850;Os03g0401333;Os03g0411800;Os03g0629450;Os03g0640800;Os03g0643611;Os03g0664400;Os03g0689833;Os03g0722000;Os03g0741900;Os03g0765100;Os03g0781400;Os03g0793800;Os03g0835700;Os04g0116900;Os04g0163800;Os04…	0.0143751	4.55833	up
MSTRG.42688.1	Os09g0100800;Os09g0100750	BAC19868;BAC19872;BAC19873;BAC19902;CAA33927;CAA33928;CAA33941;CAA33951;Os01g0100300;Os01g0100466;Os01g0100900;Os01g0101900;Os01g0102000;Os01g0103900;Os01g0107750;Os01g0107900;Os01g0108000;Os01g0108400;Os01g0108700;Os01g0109366;Os01g0109700;Os01g0110400;Os01g0110600;Os01g0111000;Os01g0111200;Os01g0112000;Os01g0113200;Os01g0113300;Os01g0113325;Os01g0113400;Os01g0113450;Os01g0113500;Os01g0113650;Os…	0.0425392	2.80136	up
MSTRG.42754.2	Os09g0109500;Os09g0111300;Os09g0111800;Os09g0112100;Os09g0109800;Os09g0110100;Os09g0110500;Os09g0109600;Os09g0110750;Os09g0111700;Os09g0110200;Os09g0112400;Os09g0110151;Os09g0108600;Os09g0110300;Os09g0110400;Os09g0111100;Os09g0109150	BAC19875;CAA33987;Os01g0100700;Os01g0103000;Os01g0103800;Os01g0104800;Os01g0106400;Os01g0106500;Os01g0108200;Os01g0109201;Os01g0112100;Os01g0120800;Os01g0123500;Os01g0127400;Os01g0129600;Os01g0138100;Os01g0143300;Os01g0143350;Os01g0143800;Os01g0150800;Os01g0152951;Os01g0157800;Os01g0159200;Os01g0162001;Os01g0164500;Os01g0166300;Os01g0167600;Os01g0167800;Os01g0168800;Os01g0171800;Os01g0172800;Os01…	0.0182381	3.86454	up
MSTRG.42786.1	Os09g0114700;Os09g0114500;Os09g0115466;Os09g0115600;Os09g0115400;Os09g0116050;Os09g0116600;Os09g0115900;Os09g0115500;Os09g0116900;Os09g0116100;Os09g0116400;Os09g0116800;Os09g0116000	CAA33956;Os01g0103100;Os01g0105800;Os01g0115100;Os01g0127300;Os01g0128200;Os01g0128400;Os01g0128800;Os01g0131450;Os01g0136000;Os01g0137950;Os01g0138000;Os01g0139200;Os01g0154600;Os01g0155600;Os01g0158800;Os01g0159000;Os01g0159400;Os01g0159800;Os01g0168100;Os01g0168850;Os01g0174300;Os01g0175700;Os01g0176300;Os01g0176700;Os01g0180300;Os01g0191100;Os01g0191500;Os01g0192000;Os01g0192101;Os01g0192300;…	0.00625588	4.3963	up
MSTRG.43115.1	Os09g0266100;Os09g0265225;Os09g0266000;Os09g0266300;Os09g0265800	BAC19875;CAA33947;CAA33956;CAA34005;CAA34006;Os01g0103075;Os01g0103100;Os01g0105900;Os01g0106400;Os01g0120800;Os01g0127300;Os01g0127400;Os01g0128200;Os01g0128800;Os01g0131450;Os01g0136000;Os01g0143350;Os01g0143800;Os01g0144600;Os01g0159000;Os01g0159800;Os01g0164500;Os01g0166300;Os01g0166400;Os01g0167800;Os01g0168600;Os01g0168850;Os01g0173100;Os01g0174300;Os01g0178200;Os01g0180300;Os01g0183500;Os0…	0.0129813	4.51219	up
MSTRG.43225.1	Os09g0281850;Os09g0282300;Os09g0282100;Os09g0281800;Os09g0281700;Os09g0281300;Os09g0281900;Os09g0281750;Os09g0281600;Os09g0282701	Os01g0103650;Os01g0105800;Os01g0115100;Os01g0117025;Os01g0136850;Os01g0137950;Os01g0149350;Os01g0159400;Os01g0162200;Os01g0167400;Os01g0168100;Os01g0175700;Os01g0176700;Os01g0182200;Os01g0186400;Os01g0189800;Os01g0194600;Os01g0216000;Os01g0222500;Os01g0222600;Os01g0239150;Os01g0252100;Os01g0260700;Os01g0269000;Os01g0281000;Os01g0299801;Os01g0315600;Os01g0327500;Os01g0332800;Os01g0355100;Os01g0357…	0.0194991	4.40272	up
MSTRG.43582.2	Os09g0349650;Os09g0349600;Os09g0351800;Os09g0349700;Os09g0350900;Os09g0351700;Os09g0349100;Os09g0349800	BAC19868;BAC19872;BAC19873;BAC19902;CAA33920;CAA33927;CAA33928;CAA33941;CAA33951;Os01g0100300;Os01g0100900;Os01g0101900;Os01g0102000;Os01g0103900;Os01g0107750;Os01g0107900;Os01g0108000;Os01g0108400;Os01g0108700;Os01g0109366;Os01g0110400;Os01g0110600;Os01g0111000;Os01g0111200;Os01g0112000;Os01g0113200;Os01g0113300;Os01g0113325;Os01g0113400;Os01g0113450;Os01g0113500;Os01g0113650;Os01g0113700;Os01g0…	0.000548378	8.07967	up
MSTRG.43794.3	Os09g0386500;Os09g0386400;Os09g0387150;Os09g0388400;Os09g0387800;Os09g0387000;Os09g0388550;Os09g0386450;Os09g0386600	BAC19868;BAC19872;BAC19873;BAC19902;CAA33920;CAA33941;CAA33951;CAA33953;Os01g0100300;Os01g0100466;Os01g0100900;Os01g0101850;Os01g0101900;Os01g0102000;Os01g0103900;Os01g0104500;Os01g0104600;Os01g0106900;Os01g0107750;Os01g0107900;Os01g0108000;Os01g0108400;Os01g0108700;Os01g0109366;Os01g0109700;Os01g0110200;Os01g0110400;Os01g0110600;Os01g0111000;Os01g0111200;Os01g0111500;Os01g0112000;Os01g0113200;Os…	0.000193213	7.98499	up
MSTRG.43795.1	Os09g0388400;Os09g0387150;Os09g0386500;Os09g0387800;Os09g0387000;Os09g0386450;Os09g0388550;Os09g0386600	BAC19894;CAA33958;Os01g0108500;Os01g0117100;Os01g0120600;Os01g0121500;Os01g0121950;Os01g0122367;Os01g0128200;Os01g0128250;Os01g0139200;Os01g0148200;Os01g0150500;Os01g0150950;Os01g0152100;Os01g0152200;Os01g0153600;Os01g0154600;Os01g0155300;Os01g0155600;Os01g0158800;Os01g0159500;Os01g0176300;Os01g0176900;Os01g0177200;Os01g0189700;Os01g0198000;Os01g0201850;Os01g0205300;Os01g0207500;Os01g0207700;Os01…	0.0236329	4.63638	up
MSTRG.44136.6	Os09g0436200;Os09g0435250;Os09g0436600;Os09g0437400;Os09g0436850;Os09g0437100;Os09g0436000;Os09g0436700;Os09g0434600;Os09g0434900;Os09g0436900;Os09g0435700;Os09g0434500;Os09g0436800;Os09g0435100;Os09g0436300;Os09g0436500	Os01g0103650;Os01g0114600;Os01g0132100;Os01g0134900;Os01g0136600;Os01g0136850;Os01g0149350;Os01g0164400;Os01g0166200;Os01g0167700;Os01g0177100;Os01g0179300;Os01g0180700;Os01g0180850;Os01g0189800;Os01g0202500;Os01g0209800;Os01g0209901;Os01g0214800;Os01g0216000;Os01g0222500;Os01g0236700;Os01g0243100;Os01g0243300;Os01g0246500;Os01g0252100;Os01g0256900;Os01g0259200;Os01g0260700;Os01g0263900;Os01g0265…	0.044595	-1.4862	down
MSTRG.44784.1	Os09g0511300;Os09g0514400;Os09g0513000;Os09g0513600;Os09g0514350;Os09g0512800;Os09g0511900;Os09g0514300;Os09g0514500;Os09g0514700;Os09g0511500;Os09g0514200;Os09g0513100;Os09g0512900;Os09g0515100;Os09g0514550;Os09g0511700;Os09g0513400;Os09g0514600;Os09g0513700;Os09g0512066;Os09g0514900;Os09g0512950;Os09g0512700;Os09g0512000;Os09g0515200;Os09g0512200;Os09g0513500;Os09g0513800;Os09g0514100;Os09g0513…	Os01g0113350;Os01g0128800;Os01g0136850;Os01g0137950;Os01g0138000;Os01g0168100;Os01g0175600;Os01g0175700;Os01g0179600;Os01g0180300;Os01g0189800;Os01g0194600;Os01g0201200;Os01g0205200;Os01g0220200;Os01g0221400;Os01g0222600;Os01g0223000;Os01g0252100;Os01g0259200;Os01g0274100;Os01g0279200;Os01g0281000;Os01g0299700;Os01g0299801;Os01g0315600;Os01g0321900;Os01g0327500;Os01g0332800;Os01g0347000;Os01g0357…	0.000188834	-2.7114	down
MSTRG.45520.1		BAC19860;BAC19892;CAA33963;CAA33964;CAA33965;CAA33967;Os01g0110700;Os01g0130200;Os01g0132100;Os01g0179500;Os01g0183633;Os01g0201700;Os01g0209800;Os01g0209901;Os01g0223600;Os01g0223900;Os01g0228600;Os01g0259200;Os01g0317500;Os01g0379101;Os01g0384300;Os01g0510901;Os01g0515300;Os01g0520600;Os01g0524500;Os03g0281000;Os03g0294800;Os03g0295932;Os03g0298800;Os03g0300700;Os03g0305800;Os03g0321900;Os03g03…	0.0292383	-1.38648	down
MSTRG.45533.1		BAC19894;CAA33958;Os01g0108500;Os01g0117100;Os01g0120600;Os01g0121500;Os01g0121950;Os01g0122367;Os01g0128200;Os01g0138232;Os01g0148200;Os01g0150500;Os01g0150950;Os01g0152100;Os01g0152200;Os01g0153600;Os01g0154600;Os01g0155300;Os01g0158800;Os01g0159500;Os01g0176300;Os01g0176900;Os01g0189700;Os01g0198000;Os01g0201850;Os01g0205300;Os01g0207500;Os01g0207700;Os01g0210200;Os01g0211200;Os01g0212900;Os01…	0.0186216	4.11276	up
MSTRG.4633.1	Os01g0816700;Os01g0817633;Os01g0817000;Os01g0815100;Os01g0816500;Os01g0815900;Os01g0815400;Os01g0818200;Os01g0814800;Os01g0818000;Os01g0815850;Os01g0815700;Os01g0817800;Os01g0817650;Os01g0816850;Os01g0816100;Os01g0817900;Os01g0817100;Os01g0817400;Os01g0814400;Os01g0814700;Os01g0817700;Os01g0816000;Os01g0815800;Os01g0818100;Os01g0814900;Os01g0816400	CAA33924;CAA33973;Os01g0100650;Os01g0102850;Os01g0127450;Os01g0218500;Os01g0221900;Os01g0233800;Os01g0234001;Os01g0237000;Os01g0263400;Os01g0343500;Os01g0371400;Os01g0508500;Os01g0530366;Os03g0278566;Os03g0281900;Os03g0302000;Os03g0355300;Os03g0371400;Os03g0385100;Os03g0390700;Os03g0392400;Os03g0401333;Os03g0411800;Os03g0415351;Os03g0415750;Os03g0435800;Os03g0439900;Os03g0601000;Os03g0629450;Os03…	0.0361221	3.69645	up
MSTRG.4713.2	Os01g0823150;Os01g0823500;Os01g0824000;Os01g0823951;Os01g0822501;Os01g0824600;Os01g0823400;Os01g0825166;Os01g0823300;Os01g0823700;Os01g0823900;Os01g0822900;Os01g0824500;Os01g0823200;Os01g0822800;Os01g0824800;Os01g0823100;Os01g0823600;Os01g0825000;Os01g0824700;Os01g0824900;Os01g0825332	BAC19868;BAC19872;BAC19873;BAC19902;CAA33920;CAA33927;CAA33928;CAA33941;CAA33951;CAA33999;Os01g0100300;Os01g0100900;Os01g0101900;Os01g0102000;Os01g0103900;Os01g0107750;Os01g0107900;Os01g0108000;Os01g0108400;Os01g0108700;Os01g0109366;Os01g0110400;Os01g0110600;Os01g0111000;Os01g0111200;Os01g0112000;Os01g0113200;Os01g0113300;Os01g0113325;Os01g0113400;Os01g0113450;Os01g0113500;Os01g0113650;Os01g01137…	0.00243156	7.62393	up
MSTRG.4938.1	Os01g0850550;Os01g0848200;Os01g0848900;Os01g0848550;Os01g0849000;Os01g0850000;Os01g0849500;Os01g0848400;Os01g0848300;Os01g0848475;Os01g0850200;Os01g0850700;Os01g0849950;Os01g0850400;Os01g0848766;Os01g0849600;Os01g0849100;Os01g0850100;Os01g0848700	Os01g0114400;Os01g0115600;Os01g0116901;Os01g0117450;Os01g0117650;Os01g0117700;Os01g0126600;Os01g0133200;Os01g0136500;Os01g0151750;Os01g0152300;Os01g0153000;Os01g0153300;Os01g0180400;Os01g0197350;Os01g0201250;Os01g0210550;Os01g0216300;Os01g0216400;Os01g0228400;Os01g0231950;Os01g0236300;Os01g0248800;Os01g0255000;Os01g0263000;Os01g0281050;Os01g0290600;Os01g0297200;Os01g0346600;Os01g0357200;Os01g0374…	0.0464783	-1.5381	down
MSTRG.4985.1	Os01g0855900;Os01g0854651;Os01g0855200;Os01g0855700;Os01g0856600;Os01g0855600;Os01g0856900;Os01g0854400;Os01g0856000;Os01g0855000;Os01g0856850;Os01g0854500;Os01g0856500;Os01g0854800;Os01g0855400;Os01g0856800	BAC19864;CAA33917;Os01g0108800;Os01g0115200;Os01g0126000;Os01g0130200;Os01g0140700;Os01g0179500;Os01g0192600;Os01g0201700;Os01g0209800;Os01g0223900;Os01g0248701;Os01g0249100;Os01g0261700;Os01g0270300;Os01g0273200;Os01g0287400;Os01g0300900;Os01g0312500;Os01g0313300;Os01g0330650;Os01g0384300;Os01g0520600;Os01g0524500;Os01g0525701;Os01g0527900;Os03g0281000;Os03g0304500;Os03g0305800;Os03g0341600;Os03…	0.0065805	-3.67609	down
MSTRG.5338.1	Os01g0897600;Os01g0894700;Os01g0896200;Os01g0895600;Os01g0896500;Os01g0896300;Os01g0896700;Os01g0895000;Os01g0897000;Os01g0897200;Os01g0895100;Os01g0894500;Os01g0894075;Os01g0897500;Os01g0898300;Os01g0894000;Os01g0897300;Os01g0895300;Os01g0894050;Os01g0894600;Os01g0894300;Os01g0897800;Os01g0894100;Os01g0896800;Os01g0895200;Os01g0895500;Os01g0896400;Os01g0897100;Os01g0897700	CAA33938;CAA33947;CAA33956;CAA33991;CAA34006;Os01g0105800;Os01g0113350;Os01g0132100;Os01g0138000;Os01g0141000;Os01g0162200;Os01g0183633;Os01g0194600;Os01g0205200;Os01g0209800;Os01g0209901;Os01g0221400;Os01g0222600;Os01g0252100;Os01g0259200;Os01g0281000;Os01g0299700;Os01g0326000;Os01g0357100;Os01g0367700;Os01g0379101;Os01g0382700;Os01g0383700;Os01g0384300;Os01g0387133;Os01g0391600;Os01g0506100;Os0…	0.00071358	-5.69267	down
MSTRG.5573.1	Os01g0923700;Os01g0922000;Os01g0922700;Os01g0923400;Os01g0924200;Os01g0922800;Os01g0923200;Os01g0923600;Os01g0923800;Os01g0923950;Os01g0923900;Os01g0923300;Os01g0922100;Os01g0922350;Os01g0922600;Os01g0924000;Os01g0923750;Os01g0923000;Os01g0924300	Os01g0103650;Os01g0144900;Os01g0145000;Os01g0182200;Os01g0186400;Os01g0251000;Os01g0253800;Os01g0258100;Os01g0280600;Os01g0355100;Os01g0357400;Os01g0509800;Os03g0356470;Os03g0365700;Os03g0377100;Os03g0383900;Os03g0582550;Os03g0585900;Os03g0640800;Os03g0642900;Os03g0643611;Os03g0664600;Os03g0676100;Os03g0701100;Os03g0703100;Os03g0741525;Os03g0791366;Os03g0793900;Os03g0794000;Os03g0821350;Os04g0227…	0.0316598	3.73971	up
MSTRG.5637.1	Os01g0930200;Os01g0928000;Os01g0931200;Os01g0931600;Os01g0928800;Os01g0931000;Os01g0928200;Os01g0930500;Os01g0928700;Os01g0929000;Os01g0929600;Os01g0927950;Os01g0929967;Os01g0929500;Os01g0928300;Os01g0930950;Os01g0930800;Os01g0932000;Os01g0931300;Os01g0929100;Os01g0927900;Os01g0928400;Os01g0930000;Os01g0931700;Os01g0930400;Os01g0928600;Os01g0929200;Os01g0928100;Os01g0930900;Os01g0931100;Os01g0930…	Os01g0115566;Os01g0115600;Os01g0117700;Os01g0136500;Os01g0152300;Os01g0153300;Os01g0175600;Os01g0179600;Os01g0180400;Os01g0201200;Os01g0201250;Os01g0216300;Os01g0216400;Os01g0220200;Os01g0223000;Os01g0227500;Os01g0228400;Os01g0236300;Os01g0236900;Os01g0255000;Os01g0281050;Os01g0297200;Os01g0347000;Os03g0279200;Os03g0295300;Os03g0310701;Os03g0337550;Os03g0364400;Os03g0366200;Os03g0375200;Os03g0375…	0.0278087	-1.41811	down
MSTRG.5679.8	Os01g0934100;Os01g0934200;Os01g0935450;Os01g0932600;Os01g0935400;Os01g0932950;Os01g0935300;Os01g0935000;Os01g0934500;Os01g0936600;Os01g0933600;Os01g0934900;Os01g0933950;Os01g0934300;Os01g0934350;Os01g0932700;Os01g0935700;Os01g0934600;Os01g0934400;Os01g0934000;Os01g0934800;Os01g0935900;Os01g0935500;Os01g0934700;Os01g0932650;Os01g0935600;Os01g0933200;Os01g0933075;Os01g0933500;Os01g0935350;Os01g0936…	BAC19875;CAA33986;CAA33987;Os01g0100700;Os01g0103000;Os01g0103075;Os01g0103800;Os01g0104800;Os01g0105900;Os01g0106400;Os01g0106500;Os01g0108200;Os01g0109201;Os01g0112100;Os01g0120800;Os01g0123500;Os01g0127400;Os01g0129600;Os01g0138100;Os01g0143300;Os01g0143350;Os01g0143800;Os01g0147700;Os01g0152951;Os01g0162001;Os01g0164500;Os01g0166300;Os01g0167600;Os01g0167800;Os01g0168300;Os01g0168800;Os01g017…	4.06843e-06	7.75744	up
MSTRG.5687.1	Os01g0936800;Os01g0934700;Os01g0936700;Os01g0935500;Os01g0935900;Os01g0934800;Os01g0936950;Os01g0935600;Os01g0937012;Os01g0935800;Os01g0935350;Os01g0936200;Os01g0933500;Os01g0936000;Os01g0935050;Os01g0936100;Os01g0935200;Os01g0933400;Os01g0937000;Os01g0933900;Os01g0935000;Os01g0935300;Os01g0935400;Os01g0934100;Os01g0935450;Os01g0934200;Os01g0936600;Os01g0933600;Os01g0934500;Os01g0934350;Os01g0933…	BAC19868;BAC19872;BAC19873;BAC19902;CAA33920;CAA33927;CAA33928;CAA33941;CAA33951;Os01g0100300;Os01g0100900;Os01g0101900;Os01g0102000;Os01g0103900;Os01g0107750;Os01g0107900;Os01g0108000;Os01g0108400;Os01g0108700;Os01g0109366;Os01g0110400;Os01g0110600;Os01g0111000;Os01g0111200;Os01g0112000;Os01g0113200;Os01g0113300;Os01g0113325;Os01g0113400;Os01g0113450;Os01g0113500;Os01g0113650;Os01g0113700;Os01g0…	0.000943381	7.56969	up
MSTRG.6112.2	Os10g0111325;Os10g0109900;Os10g0111900;Os10g0110600;Os10g0109700;Os10g0110250;Os10g0112700;Os10g0112500;Os10g0111800;Os10g0111300;Os10g0112600;Os10g0109600;Os10g0110425;Os10g0110950;Os10g0111400;Os10g0110800;Os10g0111700;Os10g0112100;Os10g0109750	Os01g0115200;Os01g0126000;Os01g0130200;Os01g0132100;Os01g0208600;Os01g0209800;Os01g0209901;Os01g0330650;Os01g0379101;Os01g0384300;Os01g0527900;Os03g0294800;Os03g0295700;Os03g0304500;Os03g0305800;Os03g0326500;Os03g0337700;Os03g0386800;Os03g0399800;Os03g0432666;Os03g0605300;Os03g0617500;Os03g0624600;Os03g0654400;Os03g0673000;Os03g0682100;Os03g0718000;Os03g0761500;Os03g0804000;Os03g0804500;Os03g0811…	0.0311005	-3.68898	down
MSTRG.6196.1	Os10g0124900;Os10g0124400;Os10g0123900;Os10g0125300;Os10g0122600;Os10g0123200;Os10g0122500;Os10g0124100;Os10g0124500;Os10g0124200;Os10g0124700;Os10g0122400;Os10g0124000	BAC19868;BAC19872;BAC19873;BAC19902;CAA33920;CAA33927;CAA33928;CAA33941;CAA33951;Os01g0100300;Os01g0100900;Os01g0101900;Os01g0102000;Os01g0103900;Os01g0107750;Os01g0107900;Os01g0108000;Os01g0108400;Os01g0108700;Os01g0109366;Os01g0109700;Os01g0110400;Os01g0110600;Os01g0111000;Os01g0111200;Os01g0112000;Os01g0113200;Os01g0113300;Os01g0113325;Os01g0113400;Os01g0113450;Os01g0113500;Os01g0113650;Os01g0…	0.00359757	6.25147	up
MSTRG.6358.1	Os10g0148400;Os10g0148700;Os10g0150600;Os10g0147900;Os10g0150000;Os10g0147250;Os10g0146901;Os10g0147200;Os10g0148100;Os10g0149200;Os10g0149400;Os10g0147566;Os10g0150200;Os10g0149000;Os10g0150300;Os10g0150700;Os10g0147400;Os10g0148800;Os10g0149100;Os10g0149800;Os10g0150400;Os10g0148000;Os10g0149700;Os10g0147300	BAC19894;BAC19898;CAA33938;CAA33958;Os01g0102500;Os01g0103100;Os01g0108500;Os01g0112500;Os01g0117100;Os01g0120600;Os01g0121500;Os01g0128200;Os01g0128250;Os01g0128400;Os01g0131450;Os01g0139200;Os01g0144600;Os01g0148200;Os01g0148500;Os01g0150500;Os01g0150950;Os01g0154600;Os01g0155600;Os01g0158800;Os01g0159000;Os01g0159400;Os01g0159500;Os01g0168100;Os01g0174300;Os01g0176300;Os01g0176800;Os01g0176900…	0.0467805	1.83897	up
MSTRG.6597.1	Os10g0178200;Os10g0180800;Os10g0180000;Os10g0179000;Os10g0181100;Os10g0178800;Os10g0178500;Os10g0180600;Os10g0179200	BAC19868;BAC19872;BAC19873;BAC19902;CAA33920;CAA33927;CAA33941;CAA33951;Os01g0100300;Os01g0100466;Os01g0100900;Os01g0101900;Os01g0102000;Os01g0103900;Os01g0104500;Os01g0106900;Os01g0107750;Os01g0107900;Os01g0108000;Os01g0108400;Os01g0108700;Os01g0109366;Os01g0109700;Os01g0110100;Os01g0110200;Os01g0110400;Os01g0110600;Os01g0111000;Os01g0111200;Os01g0112000;Os01g0113200;Os01g0113300;Os01g0113325;Os…	0.026396	4.7424	up
MSTRG.6731.1	Os10g0200000;Os10g0199500;Os10g0200700	BAC19875;CAA34005;Os01g0103075;Os01g0103100;Os01g0106400;Os01g0120800;Os01g0127400;Os01g0128200;Os01g0136000;Os01g0138232;Os01g0144600;Os01g0152100;Os01g0157600;Os01g0159000;Os01g0159800;Os01g0164500;Os01g0166300;Os01g0166400;Os01g0167800;Os01g0168850;Os01g0173100;Os01g0174300;Os01g0176900;Os01g0183500;Os01g0191100;Os01g0192000;Os01g0192101;Os01g0192300;Os01g0195200;Os01g0200300;Os01g0200350;Os01…	0.0153654	4.49067	up
MSTRG.6849.7	Os10g0317900;Os10g0317950;Os10g0318000	CAA33924;CAA33973;Os01g0100650;Os01g0102850;Os01g0127450;Os01g0197400;Os01g0218500;Os01g0221900;Os01g0229400;Os01g0234001;Os01g0237000;Os01g0263400;Os01g0291500;Os01g0343500;Os01g0371400;Os01g0508500;Os01g0510600;Os01g0530366;Os03g0281900;Os03g0302000;Os03g0355300;Os03g0371400;Os03g0385100;Os03g0390700;Os03g0392400;Os03g0401333;Os03g0411800;Os03g0415351;Os03g0415750;Os03g0428800;Os03g0435800;Os03…	0.0384674	3.58523	up
MSTRG.7240.5	Os10g0390600;Os10g0388100;Os10g0388500;Os10g0388900;Os10g0389900;Os10g0389000;Os10g0389402;Os10g0389500;Os10g0390500;Os10g0390100;Os10g0388600;Os10g0388200;Os10g0390000;Os10g0389200;Os10g0389100;Os10g0389300;Os10g0389800;Os10g0390701;Os10g0387201	CAA33947;CAA33956;CAA33959;CAA33991;Os01g0105900;Os01g0121300;Os01g0127300;Os01g0128800;Os01g0147900;Os01g0166300;Os01g0175700;Os01g0180300;Os01g0181000;Os01g0192300;Os01g0194600;Os01g0205200;Os01g0222600;Os01g0229100;Os01g0237000;Os01g0263600;Os01g0277100;Os01g0284700;Os01g0309900;Os01g0326000;Os01g0382700;Os01g0387133;Os01g0507000;Os03g0273200;Os03g0292600;Os03g0292700;Os03g0292900;Os03g0298300…	0.00665461	3.38582	up
MSTRG.7501.1	Os10g0430800;Os10g0432200;Os10g0434650;Os10g0431100;Os10g0435300;Os10g0431700;Os10g0434200;Os10g0434000;Os10g0430900;Os10g0433700;Os10g0431900;Os10g0430700;Os10g0432300;Os10g0431000;Os10g0432001;Os10g0432400;Os10g0434900;Os10g0430600;Os10g0434801;Os10g0430750;Os10g0434999;Os10g0434300;Os10g0432650;Os10g0432725;Os10g0433200	CAA33947;CAA33956;CAA33959;CAA33991;Os01g0105800;Os01g0117025;Os01g0147900;Os01g0175700;Os01g0180300;Os01g0181000;Os01g0194600;Os01g0205200;Os01g0221400;Os01g0222600;Os01g0237000;Os01g0263600;Os01g0284700;Os01g0309900;Os01g0326000;Os01g0357400;Os01g0382700;Os01g0387133;Os01g0506100;Os01g0507000;Os03g0273200;Os03g0285900;Os03g0292600;Os03g0292700;Os03g0292900;Os03g0319400;Os03g0338600;Os03g0356498…	0.00783387	4.72351	up
MSTRG.7557.1	Os10g0442466;Os10g0443000;Os10g0441800;Os10g0442532;Os10g0443800;Os10g0442100;Os10g0443200;Os10g0440100;Os10g0441900;Os10g0442700;Os10g0440500;Os10g0443600;Os10g0443100;Os10g0442800;Os10g0442000;Os10g0442600;Os10g0439986;Os10g0443400;Os10g0439924;Os10g0442900	CAA33986;CAA33987;Os01g0100700;Os01g0104800;Os01g0106400;Os01g0108200;Os01g0109201;Os01g0112100;Os01g0112600;Os01g0112800;Os01g0113150;Os01g0120800;Os01g0123500;Os01g0127000;Os01g0127400;Os01g0129600;Os01g0136100;Os01g0138100;Os01g0143300;Os01g0143350;Os01g0147700;Os01g0152951;Os01g0153550;Os01g0153950;Os01g0157600;Os01g0159200;Os01g0162300;Os01g0164500;Os01g0166400;Os01g0167600;Os01g0168300;Os01…	0.0217507	3.1754	up
MSTRG.7719.1	Os10g0467850;Os10g0467800;Os10g0468600;Os10g0466100;Os10g0468500;Os10g0466200;Os10g0468950;Os10g0465175;Os10g0465700;Os10g0467600;Os10g0466500;Os10g0465800;Os10g0466300;Os10g0465300;Os10g0466000;Os10g0468301;Os10g0467000;Os10g0465000;Os10g0467200;Os10g0469300;Os10g0466800;Os10g0467100;Os10g0466700;Os10g0469100;Os10g0465950;Os10g0467900;Os10g0468800;Os10g0468250;Os10g0465900	CAA33913;CAA33947;Os01g0108800;Os01g0113350;Os01g0115200;Os01g0126000;Os01g0138000;Os01g0141000;Os01g0155000;Os01g0179600;Os01g0209800;Os01g0209901;Os01g0221400;Os01g0227300;Os01g0259200;Os01g0299700;Os01g0326000;Os01g0357100;Os01g0367700;Os01g0379101;Os01g0383700;Os01g0384300;Os01g0506100;Os01g0520600;Os01g0527900;Os03g0285900;Os03g0294800;Os03g0295300;Os03g0297600;Os03g0305050;Os03g0305800;Os03…	0.0162451	-4.61155	down
MSTRG.8463.1	Os10g0559450;Os10g0559400;Os10g0559300;Os10g0559900;Os10g0561400;Os10g0560700;Os10g0561250;Os10g0559833;Os10g0561800;Os10g0562550;Os10g0561000;Os10g0559600;Os10g0558850;Os10g0560500;Os10g0560451;Os10g0562000;Os10g0561300;Os10g0559800;Os10g0560000;Os10g0559650;Os10g0558750;Os10g0559500;Os10g0560200;Os10g0562600;Os10g0559866;Os10g0562200;Os10g0560400;Os10g0561200;Os10g0562100;Os10g0559550;Os10g0561…	BAC19868;BAC19872;BAC19873;BAC19902;CAA33920;CAA33927;CAA33928;CAA33941;CAA33951;Os01g0100300;Os01g0100900;Os01g0101900;Os01g0102000;Os01g0103900;Os01g0107750;Os01g0107900;Os01g0108000;Os01g0108400;Os01g0108700;Os01g0109366;Os01g0109700;Os01g0110400;Os01g0110500;Os01g0110600;Os01g0111000;Os01g0111200;Os01g0112000;Os01g0113200;Os01g0113300;Os01g0113325;Os01g0113400;Os01g0113450;Os01g0113500;Os01g0…	0.0271216	4.50068	up
MSTRG.8680.1	Os11g0104400;Os11g0102800;Os11g0102900;Os11g0103050;Os11g0105350;Os11g0104833;Os11g0103700;Os11g0104220;Os11g0103150;Os11g0105750;Os11g0104300;Os11g0104866;Os11g0103100;Os11g0103400;Os11g0104260;Os11g0103800;Os11g0104150;Os11g0105000;Os11g0102600;Os11g0105775;Os11g0102301;Os11g0105800;Os11g0102700;Os11g0103000;Os11g0104800;Os11g0102500;Os11g0102200;Os11g0103550;Os11g0104900;Os11g0104240;Os11g0105…	BAC19884;CAA33916;CAA33972;CAA33982;CAA33985;CAA33990;CAA33995;CAA34001;CAA34014;Os01g0106200;Os01g0114000;Os01g0115725;Os01g0121100;Os01g0144200;Os01g0145200;Os01g0145600;Os01g0148000;Os01g0149500;Os01g0149750;Os01g0151400;Os01g0151700;Os01g0174900;Os01g0187000;Os01g0221600;Os01g0226200;Os01g0233500;Os01g0260000;Os01g0296166;Os01g0305900;Os01g0308700;Os01g0495701;Os01g0533000;Os03g0277100;Os03g0…	0.00541508	-4.52851	down
MSTRG.8689.1	Os11g0104300;Os11g0104866;Os11g0103100;Os11g0103400;Os11g0104260;Os11g0103800;Os11g0104150;Os11g0105000;Os11g0104050;Os11g0103700;Os11g0105901;Os11g0104220;Os11g0103150;Os11g0105750;Os11g0105350;Os11g0104833;Os11g0104400;Os11g0106400;Os11g0102900;Os11g0106800;Os11g0106000;Os11g0103050;Os11g0103550;Os11g0104900;Os11g0104240;Os11g0105400;Os11g0106900;Os11g0106200;Os11g0104800;Os11g0106083;Os11g0106…	CAA33924;CAA33959;CAA33973;Os01g0100650;Os01g0102400;Os01g0102850;Os01g0127450;Os01g0137266;Os01g0162500;Os01g0221900;Os01g0233800;Os01g0237000;Os01g0263400;Os01g0343500;Os01g0371400;Os01g0508500;Os03g0281900;Os03g0308850;Os03g0385100;Os03g0390700;Os03g0401333;Os03g0411800;Os03g0415351;Os03g0415750;Os03g0435800;Os03g0601000;Os03g0616400;Os03g0629450;Os03g0633500;Os03g0664400;Os03g0664650;Os03g068…	0.0169937	4.54076	up
MSTRG.8828.1	Os11g0119900;Os11g0119200;Os11g0121000;Os11g0121300;Os11g0120300;Os11g0121600;Os11g0119311;Os11g0121400;Os11g0120850;Os11g0120200;Os11g0120600;Os11g0123033;Os11g0121500;Os11g0122150;Os11g0119800;Os11g0123066;Os11g0122800;Os11g0120725;Os11g0120100;Os11g0119700	BAC19875;CAA33947;CAA33959;CAA33991;Os01g0103800;Os01g0105900;Os01g0127400;Os01g0143800;Os01g0147900;Os01g0162001;Os01g0166300;Os01g0168600;Os01g0178200;Os01g0191200;Os01g0192300;Os01g0200500;Os01g0205200;Os01g0218900;Os01g0221000;Os01g0229100;Os01g0237000;Os01g0241000;Os01g0247500;Os01g0259900;Os01g0266000;Os01g0276000;Os01g0284700;Os01g0293200;Os01g0306800;Os01g0309900;Os01g0318000;Os01g0326000…	0.0210976	4.2945	up
MSTRG.8898.8	Os11g0131100;Os11g0130700;Os11g0132501;Os11g0131700;Os11g0133200;Os11g0133300;Os11g0129500;Os11g0133500;Os11g0131300;Os11g0131900;Os11g0130200;Os11g0133001;Os11g0130300;Os11g0129600;Os11g0132600;Os11g0129700;Os11g0131600;Os11g0131500;Os11g0129800;Os11g0131200;Os11g0130800;Os11g0129301;Os11g0132100;Os11g0132700;Os11g0133100;Os11g0132400;Os11g0130100;Os11g0130500;Os11g0130900;Os11g0132000;Os11g0131…	CAA33946;CAA33961;Os01g0100466;Os01g0101850;Os01g0102500;Os01g0104500;Os01g0105800;Os01g0109700;Os01g0110200;Os01g0110400;Os01g0110700;Os01g0112500;Os01g0114600;Os01g0115100;Os01g0117000;Os01g0117100;Os01g0118000;Os01g0120600;Os01g0121800;Os01g0125850;Os01g0128250;Os01g0128400;Os01g0133500;Os01g0134900;Os01g0135800;Os01g0139200;Os01g0149350;Os01g0150500;Os01g0150950;Os01g0151600;Os01g0153600;Os01…	0.0341889	3.40797	up
MSTRG.9426.1	Os11g0212900;Os11g0210700;Os11g0212801;Os11g0210500;Os11g0210600;Os11g0210100;Os11g0213000;Os11g0211400;Os11g0210201;Os11g0211700;Os11g0211600;Os11g0212100;Os11g0211200;Os11g0211650;Os11g0211800;Os11g0210300;Os11g0212300;Os11g0211300;Os11g0212000	CAA33908;CAA33920;CAA33941;Os01g0100466;Os01g0101850;Os01g0102000;Os01g0104500;Os01g0106900;Os01g0108500;Os01g0109700;Os01g0110200;Os01g0110400;Os01g0111500;Os01g0112500;Os01g0114600;Os01g0115100;Os01g0117000;Os01g0117100;Os01g0118000;Os01g0120600;Os01g0121500;Os01g0121600;Os01g0121800;Os01g0122534;Os01g0124000;Os01g0124600;Os01g0125800;Os01g0125850;Os01g0125900;Os01g0127100;Os01g0128250;Os01g012…	0.00112139	6.02239	up
MSTRG.962.1	Os01g0212900;Os01g0214400;Os01g0214200;Os01g0214001;Os01g0212000;Os01g0214901;Os01g0215000;Os01g0214300;Os01g0212500;Os01g0212400;Os01g0213800;Os01g0214500;Os01g0214600;Os01g0214800;Os01g0215500;Os01g0215100;Os01g0211800;Os01g0212700;Os01g0212100	BAC19868;BAC19872;BAC19873;BAC19902;CAA33920;CAA33927;CAA33941;CAA33951;Os01g0100300;Os01g0100466;Os01g0100900;Os01g0101900;Os01g0102000;Os01g0103900;Os01g0107750;Os01g0107900;Os01g0108000;Os01g0108400;Os01g0108700;Os01g0109366;Os01g0109700;Os01g0110400;Os01g0110600;Os01g0111000;Os01g0111200;Os01g0112000;Os01g0113200;Os01g0113300;Os01g0113325;Os01g0113400;Os01g0113450;Os01g0113500;Os01g0113650;Os…	0.00871577	3.37242	up
MSTRG.9714.4	Os11g0260200;Os11g0262200;Os11g0261300;Os11g0262500;Os11g0261900;Os11g0261600;Os11g0261500;Os11g0262600	BAC19868;BAC19872;BAC19873;BAC19902;CAA33920;CAA33927;CAA33928;CAA33941;CAA33951;Os01g0100300;Os01g0100466;Os01g0100900;Os01g0101900;Os01g0102000;Os01g0103900;Os01g0107750;Os01g0107900;Os01g0108000;Os01g0108400;Os01g0108700;Os01g0109366;Os01g0109700;Os01g0110400;Os01g0110600;Os01g0111000;Os01g0111200;Os01g0112000;Os01g0113200;Os01g0113300;Os01g0113325;Os01g0113400;Os01g0113450;Os01g0113500;Os01g0…	0.0293613	2.73503	up
MSTRG.9722.3	Os11g0261900;Os11g0264000;Os11g0262500;Os11g0263000;Os11g0261300;Os11g0262200;Os11g0261500;Os11g0261600	BAC19868;BAC19872;BAC19873;BAC19902;CAA33927;CAA33936;Os01g0100300;Os01g0100900;Os01g0101900;Os01g0103900;Os01g0107750;Os01g0107900;Os01g0108000;Os01g0108400;Os01g0108700;Os01g0109366;Os01g0110600;Os01g0111000;Os01g0111200;Os01g0112000;Os01g0113200;Os01g0113325;Os01g0113400;Os01g0113450;Os01g0113500;Os01g0113650;Os01g0113700;Os01g0113800;Os01g0114100;Os01g0116250;Os01g0118300;Os01g0120700;Os01g01…	0.0468596	3.97337	up
MSTRG.9723.1	Os11g0262200;Os11g0261300;Os11g0263000;Os11g0262500;Os11g0264000;Os11g0261900;Os11g0264300;Os11g0264200;Os11g0261600;Os11g0261500;Os11g0262600	CAA33959;CAA33991;Os01g0117025;Os01g0162500;Os01g0186400;Os01g0222600;Os01g0237000;Os01g0251000;Os01g0357400;Os01g0387133;Os01g0509800;Os03g0285900;Os03g0292700;Os03g0308850;Os03g0336900;Os03g0356470;Os03g0375933;Os03g0616500;Os03g0640800;Os03g0643611;Os03g0654400;Os03g0654500;Os03g0711425;Os03g0722000;Os03g0741900;Os03g0742850;Os03g0781400;Os03g0791300;Os03g0793800;Os03g0797902;Os03g0820100;Os03…	0.000685677	4.14224	up
MSTRG.9962.1	Os11g0312340;Os11g0312400;Os11g0312220	Os01g0100466;Os01g0105800;Os01g0110200;Os01g0112500;Os01g0114600;Os01g0115100;Os01g0117100;Os01g0117500;Os01g0121800;Os01g0128250;Os01g0128400;Os01g0134900;Os01g0137950;Os01g0139200;Os01g0147800;Os01g0151600;Os01g0154600;Os01g0155600;Os01g0158800;Os01g0159400;Os01g0164400;Os01g0168100;Os01g0175700;Os01g0176300;Os01g0176700;Os01g0177200;Os01g0177900;Os01g0178400;Os01g0180300;Os01g0180600;Os01g0183…	0.0157244	3.61154	up
