# Supplementary material for: Research on lncRNA related to drought resistance of Shanlan upland rice
Source: BMC Genomics. 2022 Apr 30;23:336. doi: 10.1186/s12864-022-08546-0 (PMC9055766; doi:10.1186/s12864-022-08546-0)
Supplement: Supplementary file 5 — Additional file 5: Table S005. List of differentially expressed miRNAs from the two treatment groups. [file 12864_2022_8546_MOESM5_ESM.xlsx]

## Sheet: Sheet1
Table S005. List of differentially expressed miRNAs from the two treatment groups
#ID	Target	Pvalue	log2FC	regulated	The family of the miRNA
osa-miR812v	Os04g0436900;Os02g0771600;Os12g0243050;Os02g0176100;Os06g0237100;Os04g0558700;Os09g0333600;Os10g0498100;Os03g0268400;Os02g0526650;Os11g0199000;Os09g0426100;Os12g0209502;Os07g0649200;Os07g0160100	0.0330586	-1.14032	down	miR812
osa-miR7692-3p		0.0395426	-1.755	down	-
osa-miR5504	Os12g0566400;Os05g0161700;Os06g0145400;Os01g0734800;Os02g0752250;Os07g0118300;Os11g0171601;Os10g0395150;Os04g0290000;Os12g0169950;Os03g0726300;Os10g0333000;Os06g0640599;Os03g0271500;Os04g0531600;Os12g0459300;Os02g0156100;Os08g0557100;Os07g0578600;Os11g0455800;Os02g0656300;Os04g0160801	0.0304813	1.87352	up	-
osa-miR408-5p	Os09g0423800;Os01g0894075;Os03g0213300;Os01g0860700;Os11g0163600;Os05g0556350;Os08g0504000;Os01g0210400;Os02g0108100;Os02g0157100;Os07g0545500;Os09g0401550;Os11g0184350;Os03g0262500;Os02g0194400;Os06g0163300;Os02g0793300;Os01g0861400;Os05g0357200;Os10g0538200;Os12g0233400;Os01g0668700;Os08g0124850;Os12g0601300;Os01g0728000;Os09g0402300;Os04g0487100;Os06g0146600;Os01g0623550;Os06g0218500;Os11g0189…	0.000756358	2.38544	up	miR408
osa-miR408-3p	Os01g0768200;Os10g0397400;Os01g0705000;Os11g0176200;Os07g0476200;Os12g0182100;Os04g0587751;Os10g0559800;Os09g0446275;Os01g0126100;Os06g0266400;Os04g0535600;Os03g0436400;Os09g0365300;Os10g0350500;Os01g0576000;Os03g0166800;Os01g0349400;Os06g0611150;Os04g0197100;Os01g0973550;Os05g0151000;Os01g0378100;Os01g0576050;Os03g0773000;Os08g0337601;Os08g0482700;Os02g0598200;Os03g0297900;Os02g0272100;Os01g0827…	0.0468699	1.16406	up	miR408
osa-miR399d	Os02g0216300;Os05g0548500;Os12g0154600;Os01g0781200;Os04g0415000;Os05g0293600;Os08g0468400;Os10g0558125;Os08g0564000;Os09g0472200;Os04g0645100;Os05g0529700;Os04g0475300;Os08g0484100;Os01g0871350;Os02g0291500;Os04g0656100;Os05g0557700;Os12g0154000;Os02g0614966;Os06g0167500;Os01g0600400;Os04g0691900	0.0446808	-1.61499	down	miR399
osa-miR398b	Os10g0567200;Os06g0663100;Os11g0129301;Os03g0351500;Os03g0214100;Os03g0604401;Os07g0436350;Os01g0916400;Os04g0163425;Os12g0126050;Os12g0125550;Os07g0665200	0.00058162	2.35229	up	miR398
osa-miR397a	Os08g0453700;Os01g0634500;Os01g0842400;Os03g0760700;Os03g0607400;Os09g0509200;Os04g0413200;Os05g0458600;Os10g0139500;Os12g0467300;Os01g0894075;Os02g0195500;Os03g0808100;Os01g0612700;Os11g0258700;Os01g0850800;Os07g0495300;Os01g0885700;Os03g0273200;Os01g0969200;Os05g0458500;Os11g0103150;Os01g0744550;Os02g0103600;Os12g0102800;Os06g0224200;Os11g0539800;Os04g0639000;Os01g0842500;Os02g0551100;Os10g0138…	0.0357617	1.315	up	miR397
osa-miR396c-5p	Os04g0609900;Os02g0710500;Os09g0531200;Os04g0354400;Os11g0303500;Os07g0294100;Os06g0727600;Os01g0686600;Os06g0474900;Os11g0680200;Os01g0510800;Os02g0535700;Os07g0631000;Os01g0180800;Os01g0830200;Os07g0179400;Os09g0468000;Os03g0639700;Os03g0299800;Os09g0421200;Os04g0373000;Os07g0599201;Os02g0288000;Os11g0162700;Os01g0725800;Os03g0188100;Os10g0151100;Os02g0812400;Os09g0324200;Os01g0835700;Os02g0776…	0.00173739	-2.23078	down	miR396
osa-miR171f-3p	Os06g0105350;Os09g0513900;Os03g0758950;Os02g0662700;Os05g0469600;Os12g0270300;Os04g0555000;Os08g0493900;Os02g0518400;Os09g0555600;Os05g0417100;Os03g0658800;Os01g0923900;Os02g0663100;Os09g0247101;Os03g0366350;Os03g0135550;Os12g0552800;Os08g0116900;Os05g0132300;Os10g0551200	0.0406941	2.19352	up	miR171_1
osa-miR171e-3p	Os09g0555600;Os02g0518400;Os02g0663100;Os01g0923900;Os03g0658800;Os05g0417100;Os04g0555000;Os08g0493900;Os05g0469600;Os12g0270300;Os02g0662700;Os03g0758950;Os06g0105350;Os09g0513900;Os05g0132300;Os08g0116900;Os10g0551200;Os12g0552800;Os03g0135550;Os09g0247101;Os03g0366350	0.0348538	2.42126	up	miR171_1
osa-miR171d-5p	Os03g0297900;Os03g0135550;Os10g0482000;Os02g0498100;Os04g0555151	0.0180158	-1.40677	down	miR171_1
osa-miR171d-3p	Os09g0247101;Os03g0366350;Os03g0135550;Os12g0552800;Os08g0116900;Os05g0132300;Os10g0551200;Os06g0105350;Os09g0513900;Os03g0758950;Os02g0662700;Os05g0469600;Os12g0270300;Os04g0555000;Os08g0493900;Os02g0518400;Os09g0555600;Os03g0658800;Os05g0417100;Os01g0923900;Os02g0663100	0.0319595	2.45777	up	miR171_1
osa-miR166k-5p	Os08g0564200;Os10g0377300;Os07g0179700;Os08g0494300;Os06g0116100;Os03g0325500;Os08g0149566;Os04g0115200;Os11g0539000;Os01g0280600;Os07g0626300;Os07g0442800;Os09g0572450;Os01g0775100;Os10g0372800;Os04g0442200;Os03g0271400;Os02g0116800;Os03g0835800;Os06g0543601;Os03g0188900;Os09g0309700;Os08g0557500;Os07g0155600;Os01g0707500;Os05g0333600;Os06g0712700;Os10g0456900	0.0327062	-2.43442	down	miR166
osa-miR166h-5p	Os10g0479800;Os11g0691300;Os09g0518400;Os04g0563050;Os01g0925100;Os12g0226500;Os11g0691100;Os06g0671150;Os06g0114400;Os11g0691650;Os04g0297933;Os04g0486800;Os04g0685900;Os02g0763501;Os06g0163000;Os09g0471400;Os01g0852100;Os10g0548700;Os05g0102800;Os10g0152000;Os02g0284300	0.0191364	-2.57341	down	miR166
osa-miR162b	Os01g0909200;Os04g0649700;Os07g0182900;Os06g0192500;Os04g0105400;Os03g0302200;Os02g0820000;Os05g0580000;Os03g0100300;Os03g0127600;Os03g0798300;Os03g0121800;Os02g0317600;Os11g0580000;Os02g0602900;Os05g0269500	0.00567533	-1.538	down	miR162_2
osa-miR159f	Os01g0153900;Os09g0384601;Os11g0117700;Os05g0490600;Os03g0331700;Os03g0796400;Os09g0538700;Os01g0812000;Os03g0800200;Os06g0605600;Os01g0561500;Os12g0210400;Os06g0355500;Os08g0512801;Os01g0680900;Os01g0507000;Os01g0665200;Os03g0578900;Os11g0597400;Os02g0671950;Os05g0566700;Os03g0789466;Os08g0332150;Os07g0227750;Os03g0683866;Os05g0501800;Os11g0569600	0.0264601	1.02974	up	miR159
osa-miR156j-3p	Os12g0197500;Os07g0101800;Os09g0420900;Os09g0564200;Os08g0491200;Os05g0158700;Os08g0127800;Os08g0180300;Os08g0426000;Os05g0155000;Os02g0326100;Os04g0253601;Os11g0454800;Os03g0393300;Os08g0558900;Os02g0617600;Os04g0435300;Os06g0104300;Os02g0149600;Os01g0321800;Os11g0707900;Os08g0399900;Os10g0436900;Os01g0513900;Os09g0466201	0.0327501	-1.30477	down	miR156
Novel_7_31006		0.043021	-1.65106	down	-
Novel_6_28179	Os12g0562500;Os02g0672500;Os07g0191500;Os05g0121400;Os11g0569800;Os01g0684301;Os06g0172000	0.00837882	-1.66824	down	miR1862
Novel_6_26675		0.0214791	-1.88529	down	miR3627
Novel_6_25505	Os11g0629300;Os10g0485600;Os06g0573600	0.00685007	-2.19785	down	-
Novel_4_17120	Os01g0781700;Os12g0198400;Os12g0563500;Os01g0782100;Os08g0506000;Os03g0100900;Os06g0286500;Os07g0668800;Os08g0245400;Os02g0595300;Os09g0515100	0.0118521	-1.95293	down	-
Novel_4_15975	Os11g0199000;Os03g0268400;Os02g0771600;Os03g0339900;Os07g0160100;Os12g0614201;Os04g0558700	0.00367195	2.32894	up	miR812
Novel_3_15835	Os02g0237801;Os11g0606001;Os02g0141201;Os06g0241100;Os04g0253601;Os06g0216966;Os10g0370400;Os06g0136201;Os02g0727966;Os07g0474700;Os06g0205250;Os09g0414600;Os08g0232700;Os12g0138800	0.0174232	1.36286	up	miR169_2
Novel_3_10973	Os05g0128100;Os01g0393300;Os10g0561300;Os09g0433000;Os08g0502800;Os01g0503400;Os01g0617700;Os05g0397300;Os04g0221450;CAA33995;Os08g0171700;Os12g0542000;Os11g0194050;Os12g0620733	0.0248093	-1.97024	down	miR5564
Novel_2_9315		0.0488948	-2.08075	down	miR812
Novel_2_10762	Os04g0116600;Os06g0109000;Os06g0352200;Os06g0303800;Os06g0176300;Os08g0527800;Os01g0910200;Os06g0716600;Os12g0571900;Os01g0530400;Os06g0340200;Os03g0577800;Os09g0442800;Os09g0271000;Os05g0255800;Os07g0601900;Os04g0196200;Os05g0512200;Os11g0227700;Os01g0391600;Os06g0532301;Os04g0432200;Os03g0348800;Os12g0207200;Os01g0593500;Os03g0748750;Os04g0446000;Os05g0126700;Os08g0485800;Os07g0466300;Os05g0172…	0.029319	-4.7326	down	miR167_2
Novel_12_45703	Os03g0363900;Os02g0590700;Os02g0325401;Os07g0123700;Os01g0921100;Os03g0161000;Os06g0301300;Os05g0323100;Os12g0204600;Os03g0278000	0.00695975	-1.89191	down	-
Novel_11_42640	Os09g0515100;Os09g0442700;Os04g0455600;Os02g0595300;Os07g0668800;Os01g0290100;Os08g0276200;Os08g0245400;Os08g0506000;Os03g0794000;Os02g0789150;Os12g0563500	0.0164037	-1.90398	down	-
Novel_1_3044	Os01g0817650;Os12g0605100;Os07g0214100;Os02g0650500;Os01g0230200;Os10g0370000;Os01g0140100;Os12g0126300;Os11g0202900;Os06g0695700;Os10g0503250;Os02g0805800;Os10g0420200;Os07g0681600;Os07g0134101;Os03g0842900;Os03g0145150;Os09g0492900;Os05g0380900;Os12g0626150;Os10g0577100;Os01g0233900;Os10g0531900;Os03g0603200;Os03g0267000;Os05g0186900;Os11g0481500;Os06g0245800;Os09g0348766;Os12g0286200;Os01g0855…	0.00408516	-2.02382	down	-
Novel_1_1708	Os12g0198400;Os01g0781700;Os06g0286500;Os03g0100900;Os01g0782100;Os08g0506000;Os12g0563500;Os08g0245400;Os07g0668800;Os09g0515100;Os02g0595300	0.0125168	-1.93749	down	-
