# Supplementary material for: Research on lncRNA related to drought resistance of Shanlan upland rice
Source: BMC Genomics. 2022 Apr 30;23:336. doi: 10.1186/s12864-022-08546-0 (PMC9055766; doi:10.1186/s12864-022-08546-0)
Supplement: Supplementary file 6 — Additional file 6: Table S006. Function annotion of lncRNAs cis-target gene. [file 12864_2022_8546_MOESM6_ESM.xlsx]

## Sheet: Sheet1
Table S006. Function annotion of lncRNAs cis-target gene
#ID	FDR	log2FC	GO_annotation	KEGG_annotation	KEGG_pathway_annotation	NR_annotation
Os04g0298200	0.133481	-0.510437	--	K14696|0|osa:9269174|metal tolerance protein C4	--	hypothetical protein OsI_15280 [Oryza sativa Indica Group]
Os07g0634000	0.850329	-0.258316	Cellular Component: intrinsic component of membrane (GO:0031224);; Cellular Component: intracellular membrane-bounded organelle (GO:0043231);;	--	--	uncharacterized protein LOC4344014 [Oryza sativa Japonica Group]
Os04g0599900	0.679996	0.259108	--	K12471|0|osa:4336871|clathrin interactor EPSIN 1	Endocytosis (ko04144)	clathrin interactor EPSIN 1 [Oryza sativa Japonica Group]
Os04g0598900	0.90116	-0.31047	--	--	--	wall-associated receptor kinase 3 [Oryza sativa Japonica Group]
Os01g0623500	0.639187	0.777849	--	--	--	peroxisomal biogenesis factor 6 [Oryza sativa Japonica Group]
Os04g0498400	0.667339	-0.265878	Biological Process: protein metabolic process (GO:0019538);; Cellular Component: intrinsic component of membrane (GO:0031224);; Cellular Component: intracellular membrane-bounded organelle (GO:0043231);; Molecular Function: peptidase activity, acting on L-amino acid peptides (GO:0070011);;	--	--	unknown protein [Oryza sativa Japonica Group]
Os03g0133300	0.000190692	4.93683	--	--	--	uncharacterized protein LOC4331522 [Oryza sativa Japonica Group]
Os03g0132900	0.511593	-0.542945	Molecular Function: hydrolase activity, hydrolyzing O-glycosyl compounds (GO:0004553);; Biological Process: polysaccharide metabolic process (GO:0005976);; Biological Process: aminoglycan catabolic process (GO:0006026);; Biological Process: response to external biotic stimulus (GO:0043207);; Cellular Component: intracellular membrane-bounded organelle (GO:0043231);; Biological Process: cell wall …	K20547|2.27667e-169|osa:4331519|chitinase 11	Amino sugar and nucleotide sugar metabolism (ko00520);; MAPK signaling pathway - plant (ko04016)	chitinase 11 [Oryza sativa Japonica Group]
Os01g0387133	2.79e-06	2.91909	--	--	--	Os01g0387133, partial [Oryza sativa Japonica Group]
Os03g0738900	0.331707	-0.794996	--	--	--	Os03g0738900 [Oryza sativa Japonica Group]
Os04g0497600	0.148878	0.798423	Molecular Function: nucleic acid binding (GO:0003676);; Biological Process: gene expression (GO:0010467);; Molecular Function: small molecule binding (GO:0036094);; Cellular Component: intracellular membrane-bounded organelle (GO:0043231);;	--	--	la protein 1 [Oryza sativa Japonica Group]
Os05g0419000	0.455731	-0.604058	--	--	--	pheophytinase, chloroplastic [Oryza sativa Japonica Group]
Os07g0633600	0.417528	-1.36005	Cellular Component: intrinsic component of membrane (GO:0031224);; Cellular Component: intracellular membrane-bounded organelle (GO:0043231);; Molecular Function: metal ion binding (GO:0046872);;	--	--	hypothetical protein OsI_26994 [Oryza sativa Indica Group]
Os04g0544400	0.957156	-0.0711709	Molecular Function: protein binding (GO:0005515);; Cellular Component: plastid (GO:0009536);; Molecular Function: protein-lysine N-methyltransferase activity (GO:0016279);; Biological Process: histone methylation (GO:0016571);; Molecular Function: transition metal ion binding (GO:0046914);;	--	--	uncharacterized protein LOC4336558 [Oryza sativa Japonica Group]
Os04g0598200	0.00012559	1.71247	--	K02870|4.46788e-112|osa:4336856|60S ribosomal protein L12	Ribosome (ko03010)	hypothetical protein OsI_17237 [Oryza sativa Indica Group]
Os05g0127500	0.0440789	-1.28009	--	--	--	probable 2-oxoglutarate-dependent dioxygenase At5g05600 [Oryza sativa Japonica Group]
Os07g0100300	0.272791	-0.877319	--	K06119|0|osa:4342163|sulfoquinovosyl transferase SQD2	Glycerolipid metabolism (ko00561)	sulfoquinovosyl transferase SQD2 [Oryza sativa Japonica Group]
Os11g0104150	0.881486	-0.144205	Cellular Component: intracellular membrane-bounded organelle (GO:0043231);;	--	--	Os11g0104150, partial [Oryza sativa Japonica Group]
Os02g0829200	0.758975	0.28266	--	--	--	tricalbin-3 [Oryza sativa Japonica Group]
Os07g0160600	0.183564	-1.64491	--	--	--	fasciclin-like arabinogalactan protein 15 [Oryza sativa Japonica Group]
Os09g0110400	0.905275	0.072462	--	K03011|0|osa:4346392|DNA-directed RNA polymerases II, IV and V subunit 3	RNA polymerase (ko03020)	DNA-directed RNA polymerases II, IV and V subunit 3 [Oryza sativa Japonica Group]
Os06g0295500	0.948214	0.101551	--	--	--	uncharacterized protein LOC107275675 [Oryza sativa Japonica Group]
Os05g0375400	0.228392	1.18868	--	--	--	lichenase-2 [Oryza sativa Japonica Group]
Os06g0684000	0.376255	0.790806	--	K17871|0|osa:4341876|external alternative NAD(P)H-ubiquinone oxidoreductase B1, mitochondrial	--	external alternative NAD(P)H-ubiquinone oxidoreductase B1, mitochondrial [Oryza sativa Japonica Group]
Os01g0848700	0.335453	1.69232	Molecular Function: nucleic acid binding (GO:0003676);; Biological Process: transcription, DNA-templated (GO:0006351);; Molecular Function: purine ribonucleoside binding (GO:0032550);; Biological Process: intracellular signal transduction (GO:0035556);; Cellular Component: cell part (GO:0044464);;	K07904|1.17564e-154|osa:4324856|ras-related protein Rab2BV	Endocytosis (ko04144)	ras-related protein Rab2BV [Oryza sativa Japonica Group]
Os04g0541100	0.0564672	2.35456	--	--	--	hypothetical protein OsJ_15631 [Oryza sativa Japonica Group]
Os10g0148800	0.287819	0.579338	--	--	--	F-box/LRR-repeat protein 4 isoform X2 [Oryza sativa Japonica Group]
Os01g0627450	0.670781	-0.253424	--	--	--	cytochrome P450 72A13 [Sorghum bicolor]
Os02g0240300	0.626313	-1.88184	Molecular Function: catalytic activity (GO:0003824);; Biological Process: response to stress (GO:0006950);; Molecular Function: antioxidant activity (GO:0016209);; Biological Process: hydrogen peroxide metabolic process (GO:0042743);; Molecular Function: cation binding (GO:0043169);; Biological Process: single-organism metabolic process (GO:0044710);; Molecular Function: tetrapyrrole binding (GO:…	K00430|0|osa:4328842|peroxidase P7	Phenylpropanoid biosynthesis (ko00940)	peroxidase P7 [Oryza sativa Japonica Group]
Os10g0389100	0.0460792	1.93122	Cellular Component: plastid (GO:0009536);; Cellular Component: intrinsic component of membrane (GO:0031224);; Biological Process: single-organism process (GO:0044699);;	K13545|3.149e-65|osa:4348519|red chlorophyll catabolite reductase	Porphyrin and chlorophyll metabolism (ko00860)	Red chlorophyll catabolite reductase, putative [Oryza sativa Japonica Group]
Os07g0669800	0.717612	-0.21416	Molecular Function: transition metal ion binding (GO:0046914);;	--	--	uncharacterized protein LOC4344236 isoform X1 [Oryza sativa Japonica Group]
Os05g0500200	2.93e-05	2.63856	--	--	--	Os05g0500200 [Oryza sativa Japonica Group]
Os01g0214400	0.149275	0.56649	Cellular Component: intracellular membrane-bounded organelle (GO:0043231);;	--	--	hypothetical protein Zm00014a_000502 [Zea mays]
Os02g0281150	0.852064	-0.155613	Cellular Component: cytoplasm (GO:0005737);;	--	--	Os02g0281150, partial [Oryza sativa Japonica Group]
Os06g0477400	0.125084	-0.860195	--	--	--	Os06g0477400 [Oryza sativa Japonica Group]
Os01g0928100	0.462343	0.432157	Cellular Component: intracellular membrane-bounded organelle (GO:0043231);;	--	--	coiled-coil domain-containing protein SCD2 [Oryza sativa Japonica Group]
Os06g0334400	0.322938	0.581786	Molecular Function: protein serine/threonine kinase activity (GO:0004674);; Cellular Component: cytoplasm (GO:0005737);; Biological Process: cellular protein modification process (GO:0006464);; Biological Process: phosphate-containing compound metabolic process (GO:0006796);; Biological Process: cell cycle (GO:0007049);; Biological Process: root morphogenesis (GO:0010015);; Molecular Function: pu…	--	--	cyclin-dependent kinase F-1 [Oryza sativa Japonica Group]
Os06g0238200	0.345583	-0.843472	--	--	--	U-box domain-containing protein 39 [Oryza sativa Japonica Group]
Os06g0239000	0.975277	0.019276	Biological Process: rRNA modification (GO:0000154);; Molecular Function: RNA methyltransferase activity (GO:0008173);; Cellular Component: intracellular membrane-bounded organelle (GO:0043231);;	K03501|7.86364e-111|obr:102714021|ribosomal RNA small subunit methyltransferase G	--	uncharacterized protein LOC112936043 isoform X1 [Oryza sativa Japonica Group]
Os09g0436300	0.980216	0.0279201	--	--	--	uncharacterized protein LOC4347147 [Oryza sativa Japonica Group]
Os05g0550250	0.524595	-0.738153	Cellular Component: intrinsic component of membrane (GO:0031224);; Cellular Component: intracellular membrane-bounded organelle (GO:0043231);;	--	--	reticulon-like protein B9 [Oryza sativa Japonica Group]
Os04g0543200	0.475827	0.587241	Molecular Function: small molecule binding (GO:0036094);; Molecular Function: organic cyclic compound binding (GO:0097159);;	--	--	uncharacterized protein LOC4336550 [Oryza sativa Japonica Group]
Os02g0626400	0.720944	-0.318161	Biological Process: L-phenylalanine metabolic process (GO:0006558);; Biological Process: phenylpropanoid biosynthetic process (GO:0009699);; Molecular Function: ammonia-lyase activity (GO:0016841);; Cellular Component: intracellular part (GO:0044424);;	K10775|0|osa:4330036|phenylalanine ammonia-lyase	Phenylalanine metabolism (ko00360);; Phenylpropanoid biosynthesis (ko00940)	phenylalanine ammonia-lyase [Oryza sativa Japonica Group]
Os11g0104050	0.819807	0.207326	Biological Process: protein transport (GO:0015031);; Cellular Component: intrinsic component of membrane (GO:0031224);; Cellular Component: translocon complex (GO:0071256);;	K09481|4.14529e-23|osa:9271333|protein transport protein Sec61 subunit beta	Protein export (ko03060);; Protein processing in endoplasmic reticulum (ko04141);; Phagosome (ko04145)	protein transport protein Sec61 subunit beta [Oryza sativa Japonica Group]
Os01g0815700	0.90393	-0.111967	Cellular Component: plastid stroma (GO:0009532);; Biological Process: plastid organization (GO:0009657);; Molecular Function: transition metal ion binding (GO:0046914);;	--	--	zinc finger protein VAR3, chloroplastic [Oryza sativa Japonica Group]
Os03g0249100	0.168411	-0.8504	--	--	--	IRK-interacting protein [Oryza sativa Japonica Group]
Os02g0173000	0.0484209	2.63248	--	--	--	Os02g0173000, partial [Oryza sativa Japonica Group]
Os02g0689000	0.00212889	2.90601	--	--	--	putative invertase inhibitor [Oryza sativa Japonica Group]
Os06g0554300	0.389254	-1.36606	Cellular Component: intrinsic component of membrane (GO:0031224);; Cellular Component: intracellular membrane-bounded organelle (GO:0043231);;	--	--	dentin sialophosphoprotein [Oryza sativa Japonica Group]
Os04g0271000	0.611247	-0.313647	Molecular Function: catalytic activity (GO:0003824);; Molecular Function: anion binding (GO:0043168);; Molecular Function: cation binding (GO:0043169);; Cellular Component: intracellular membrane-bounded organelle (GO:0043231);;	K11416|0|osa:4335342|NAD-dependent protein deacetylase SRT1 isoform X1	Nicotinate and nicotinamide metabolism (ko00760)	NAD-dependent protein deacetylase SRT1 isoform X2 [Oryza sativa Japonica Group]
Os05g0215000	0.0803534	1.69655	--	--	--	RecName: Full=BURP domain-containing protein 1; Short=OsBURP01; Flags: Precursor
Os05g0587100	0.627654	0.336543	Molecular Function: phosphoprotein phosphatase activity (GO:0004721);; Biological Process: cellular protein modification process (GO:0006464);; Molecular Function: cation binding (GO:0043169);;	K17506|0|osa:4339763|probable protein phosphatase 2C 52	--	probable protein phosphatase 2C 52 isoform X1 [Oryza sativa Japonica Group]
Os07g0292800	0.183139	0.588575	--	K02896|1.09664e-97|osa:4342953|probable ribosome biogenesis protein RLP24	Ribosome (ko03010)	probable ribosome biogenesis protein RLP24 [Oryza sativa Japonica Group]
Os05g0357200	0.956486	-0.0515283	--	K15115|0|osa:4338524|nicotinamide adenine dinucleotide transporter 1, chloroplastic	--	hypothetical protein OsJ_18207 [Oryza sativa Japonica Group]
Os06g0336200	0.0692653	1.41431	--	K09873|8.33452e-152|osa:4340941|probable aquaporin TIP2-2	--	probable aquaporin TIP2-2 [Oryza sativa Japonica Group]
Os06g0554200	0.0108705	-1.48022	Molecular Function: transition metal ion binding (GO:0046914);;	--	--	Os06g0554200 [Oryza sativa Japonica Group]
Os01g0542000	0.335354	-0.971788	--	--	--	DNA damage-repair/toleration protein DRT102 [Oryza sativa Japonica Group]
Os01g0824800	0.777259	0.434832	Cellular Component: intrinsic component of membrane (GO:0031224);;	--	--	uncharacterized protein LOC4327579 isoform X1 [Oryza sativa Japonica Group]
Os02g0110101	0.877911	-0.187358	--	K10528|0|osa:4328040|probable inactive linolenate hydroperoxide lyase	alpha-Linolenic acid metabolism (ko00592)	probable inactive linolenate hydroperoxide lyase [Oryza sativa Japonica Group]
Os03g0765800	0.532668	-0.49493	--	--	--	expressed protein [Oryza sativa Japonica Group]
Os08g0434300	0.00315885	-1.83928	Biological Process: citrate metabolic process (GO:0006101);; Molecular Function: malate dehydrogenase activity (GO:0016615);; Cellular Component: intracellular membrane-bounded organelle (GO:0043231);; Biological Process: dicarboxylic acid metabolic process (GO:0043648);; Biological Process: primary metabolic process (GO:0044238);;	K00026|0|osa:4345657|malate dehydrogenase, chloroplastic	Citrate cycle (TCA cycle) (ko00020);; Cysteine and methionine metabolism (ko00270);; Pyruvate metabolism (ko00620);; Glyoxylate and dicarboxylate metabolism (ko00630);; Carbon fixation in photosynthetic organisms (ko00710);; Carbon metabolism (ko01200)	malate dehydrogenase, chloroplastic isoform X2 [Oryza sativa Japonica Group]
Os04g0599100	0.711803	0.471743	--	--	--	uncharacterized protein At1g51745 [Oryza sativa Japonica Group]
Os08g0512300	0.985374	0.0144036	--	K05956|0|osa:4346013|geranylgeranyl transferase type-2 subunit beta	--	geranylgeranyl transferase type-2 subunit beta 1 [Oryza sativa Japonica Group]
Os01g0728900	0.406697	0.539714	Cellular Component: intracellular membrane-bounded organelle (GO:0043231);;	--	--	hypothetical protein OsI_03605 [Oryza sativa Indica Group]
Os10g0124000	0.299443	0.927434	--	K12845|1.9461e-75|osa:4348007|13 kDa ribonucleoprotein-associated protein	Ribosome biogenesis in eukaryotes (ko03008);; Spliceosome (ko03040)	13 kDa ribonucleoprotein-associated protein [Oryza sativa Japonica Group]
Os07g0161600	0.756106	-0.249115	--	K13412|0|osa:4342456|calcium-dependent protein kinase 26	Plant-pathogen interaction (ko04626)	calcium-dependent protein kinase 17 [Oryza sativa Japonica Group]
Os10g0560400	0.0194159	-1.3004	--	--	--	transcription factor GHD7-like [Oryza sativa Japonica Group]
Os01g0627800	0.0631607	1.54163	--	--	--	cytochrome P450 72A13 [Oryza sativa Japonica Group]
Os01g0271500	0.513521	0.340531	--	K10686|0|osa:4325169|NEDD8-activating enzyme E1 catalytic subunit	Ubiquitin mediated proteolysis (ko04120)	NEDD8-activating enzyme E1 catalytic subunit [Oryza sativa Japonica Group]
Os10g0109900	0.557835	-1.00561	Biological Process: peptide transport (GO:0015833);; Cellular Component: intrinsic component of membrane (GO:0031224);;	--	--	Os10g0109900 [Oryza sativa Japonica Group]
Os09g0513700	0.953372	0.0620624	--	K13155|0|osa:4347560|U11/U12 small nuclear ribonucleoprotein 35 kDa protein	--	U11/U12 small nuclear ribonucleoprotein 35 kDa protein [Oryza sativa Japonica Group]
Os05g0374600	0.638178	0.198199	Cellular Component: plastid (GO:0009536);;	--	--	Os05g0374600, partial [Oryza sativa Japonica Group]
Os09g0513600	0.119587	2.50825	Molecular Function: protein kinase activity (GO:0004672);; Biological Process: protein phosphorylation (GO:0006468);; Molecular Function: purine ribonucleoside binding (GO:0032550);;	--	--	Os09g0513600 [Oryza sativa Japonica Group]
Os12g0407200	0.437888	-0.318744	Molecular Function: phosphoprotein phosphatase activity (GO:0004721);; Biological Process: protein dephosphorylation (GO:0006470);;	--	--	Os12g0407200, partial [Oryza sativa Japonica Group]
Os05g0147400	0.511213	0.404262	Molecular Function: protein binding (GO:0005515);; Biological Process: cellular process (GO:0009987);; Molecular Function: purine ribonucleoside binding (GO:0032550);; Cellular Component: intracellular part (GO:0044424);;	K09498|0|osa:4337802|T-complex protein 1 subunit zeta 1	--	T-complex protein 1 subunit zeta 1 [Oryza sativa Japonica Group]
Os03g0738400	0.328534	-0.785088	Biological Process: one-carbon metabolic process (GO:0006730);; Biological Process: serine family amino acid metabolic process (GO:0009069);; Molecular Function: hydroxymethyl-, formyl- and related transferase activity (GO:0016742);; Molecular Function: anion binding (GO:0043168);; Cellular Component: intracellular membrane-bounded organelle (GO:0043231);;	K00600|0|osa:4334048|serine hydroxymethyltransferase, mitochondrial	Glycine, serine and threonine metabolism (ko00260);; Cyanoamino acid metabolism (ko00460);; Glyoxylate and dicarboxylate metabolism (ko00630);; One carbon pool by folate (ko00670);; Carbon metabolism (ko01200);; Biosynthesis of amino acids (ko01230);; Biosynthesis of cofactors (ko01240)	serine hydroxymethyltransferase, mitochondrial [Oryza sativa Japonica Group]
Os05g0127200	0.00870842	-1.9073	Molecular Function: phospholipase C activity (GO:0004629);; Biological Process: lipid metabolic process (GO:0006629);; Biological Process: signal transduction (GO:0007165);; Cellular Component: cell part (GO:0044464);;	K05857|0|osa:4337686|phosphoinositide phospholipase C 2	Inositol phosphate metabolism (ko00562);; Phosphatidylinositol signaling system (ko04070)	phosphoinositide phospholipase C 2 isoform X1 [Oryza sativa Japonica Group]
Os03g0133800	7.6e-09	8.86932	--	--	--	probable acyl-activating enzyme 1, peroxisomal isoform X1 [Oryza sativa Japonica Group]
Os08g0359600	0.331525	0.744552	--	K02961|1.45548e-51|osa:4345370|30S ribosomal protein S17	Ribosome (ko03010)	uncharacterized protein LOC4345370 [Oryza sativa Japonica Group]
Os07g0101101	0.896808	-0.192761	--	--	--	hypothetical protein OsI_24567 [Oryza sativa Indica Group]
Os12g0209000	0.98886	-0.0141528	--	--	--	uncharacterized protein ycf45 [Oryza sativa Japonica Group]
Os04g0640500	0.276259	-0.789238	--	K08869|0|osa:4337164|uncharacterized aarF domain-containing protein kinase At1g71810, chloroplastic isoform X1	--	uncharacterized aarF domain-containing protein kinase At1g71810, chloroplastic isoform X1 [Oryza sativa Japonica Group]
Os04g0641000	0.103036	1.80165	--	K16252|0|osa:4337169|DNA-directed RNA polymerases IV and V subunit 2	--	Os04g0641000, partial [Oryza sativa Japonica Group]
Os07g0160300	0.715786	0.355685	--	--	--	uncharacterized protein LOC4342450 isoform X1 [Oryza sativa Japonica Group]
Os05g0128400	0.814246	0.113142	--	K14689|0|osa:4337694|metal tolerance protein 1	--	metal tolerance protein 1 [Oryza sativa Japonica Group]
Os04g0502300	0.00447839	1.14998	--	K02949|3.3541e-99|osa:4336317|40S ribosomal protein S11	Ribosome (ko03010)	40S ribosomal protein S11 [Oryza sativa Japonica Group]
Os02g0722300	0.988803	-0.0109609	Biological Process: cellular protein modification process (GO:0006464);; Molecular Function: kinase activity (GO:0016301);; Cellular Component: intrinsic component of membrane (GO:0031224);; Molecular Function: purine ribonucleoside binding (GO:0032550);;	K17086|0|osa:4330563|transmembrane 9 superfamily member 12	--	transmembrane 9 superfamily member 12 [Oryza sativa Japonica Group]
Os11g0103800	0.980123	0.0268762	--	--	--	hypothetical protein BAE44_0019403 [Dichanthelium oligosanthes]
Os05g0500400	0.963006	-0.0605266	Cellular Component: plastid (GO:0009536);;	--	--	uncharacterized protein LOC4339230 [Oryza sativa Japonica Group]
Os11g0105775	0.566461	-0.55372	--	--	--	protein CHUP1, chloroplastic [Oryza sativa Japonica Group]
Os05g0354300	0.200349	0.541427	Cellular Component: nuclear ubiquitin ligase complex (GO:0000152);; Biological Process: developmental process involved in reproduction (GO:0003006);; Biological Process: gametophyte development (GO:0048229);; Biological Process: chemical homeostasis (GO:0048878);;	--	--	Os05g0354300, partial [Oryza sativa Japonica Group]
Os07g0656100	0.779882	-0.339694	Cellular Component: intrinsic component of membrane (GO:0031224);;	--	--	CTL-like protein DDB_G0274487 [Oryza sativa Japonica Group]
Os05g0145600	0.00806851	0.920697	Cellular Component: intracellular membrane-bounded organelle (GO:0043231);;	--	--	pentatricopeptide repeat-containing protein At4g35850, mitochondrial [Oryza sativa Japonica Group]
Os10g0389200	0.000210431	2.16114	Cellular Component: intracellular membrane-bounded organelle (GO:0043231);;	K13545|2.11021e-172|osa:4348519|red chlorophyll catabolite reductase	Porphyrin and chlorophyll metabolism (ko00860)	red chlorophyll catabolite reductase [Oryza sativa Japonica Group]
Os04g0582000	0.000407993	2.66949	--	--	--	Os04g0582000 [Oryza sativa Japonica Group]
Os01g0591000	0.953639	0.0737872	--	K12355|0|osa:4326375|aldehyde dehydrogenase family 2 member C4	Phenylpropanoid biosynthesis (ko00940)	aldehyde dehydrogenase family 2 member C4 [Oryza sativa Japonica Group]
Os08g0512400	0.0976661	1.00476	Molecular Function: nucleic acid binding (GO:0003676);; Cellular Component: intracellular membrane-bounded organelle (GO:0043231);;	--	--	Os08g0512400, partial [Oryza sativa Japonica Group]
Os01g0504500	0.435429	-0.476617	Molecular Function: secondary active transmembrane transporter activity (GO:0015291);; Biological Process: drug transport (GO:0015893);; Cellular Component: intrinsic component of membrane (GO:0031224);;	--	--	Os01g0504500 [Oryza sativa Japonica Group]
Os03g0112101	0.921785	-0.0724823	Biological Process: protein transport (GO:0015031);; Molecular Function: substrate-specific transporter activity (GO:0022892);; Cellular Component: AP-type membrane coat adaptor complex (GO:0030119);;	K11824|0|obr:102708219|AP-2 complex subunit alpha-2-like	Endocytosis (ko04144)	PREDICTED: AP-2 complex subunit alpha-2-like [Oryza brachyantha]
Os03g0767000	0.0599151	-2.20502	--	K01723|0|osa:4334233|allene oxide synthase 1, chloroplastic	alpha-Linolenic acid metabolism (ko00592)	allene oxide synthase 1, chloroplastic [Oryza sativa Japonica Group]
Os07g0160800	0.243488	-1.52409	--	--	--	fasciclin-like arabinogalactan protein 15 [Oryza sativa Japonica Group]
Os03g0132300	0.0932139	0.96881	--	--	--	putative HVA22-like protein g [Oryza sativa Japonica Group]
Os06g0335500	0.713182	-0.307452	Molecular Function: protein binding (GO:0005515);; Biological Process: transcription, DNA-templated (GO:0006351);; Biological Process: translation (GO:0006412);; Biological Process: hormone-mediated signaling pathway (GO:0009755);; Cellular Component: intracellular membrane-bounded organelle (GO:0043231);;	K14484|2.67412e-133|osa:4340939|auxin-responsive protein IAA21	Plant hormone signal transduction (ko04075)	auxin-responsive protein IAA21 [Oryza sativa Japonica Group]
Os01g0922000	0.221634	-1.43357	Biological Process: vesicle-mediated transport (GO:0016192);; Cellular Component: protein complex (GO:0043234);;	K07195|0|osa:107275956|exocyst complex component EXO70A1-like	--	hypothetical protein OsJ_04582 [Oryza sativa Japonica Group]
Os06g0489500	0.758283	0.262934	--	K11991|0|osa:4341078|tRNA(adenine(34)) deaminase, chloroplastic isoform X1	--	tRNA(adenine(34)) deaminase, chloroplastic isoform X1 [Oryza sativa Japonica Group]
Os07g0112800	0.68503	0.235161	Biological Process: translational elongation (GO:0006414);; Biological Process: translational termination (GO:0006415);; Molecular Function: translation factor activity, RNA binding (GO:0008135);; Molecular Function: ribonucleoprotein complex binding (GO:0043021);;	K03263|1.55983e-101|osa:4342241|eukaryotic translation initiation factor 5A-4	--	eukaryotic translation initiation factor 5A-4 [Oryza sativa Japonica Group]
Os03g0766800	0.934346	-0.138376	--	--	--	uncharacterized protein LOC4334231 [Oryza sativa Japonica Group]
Os10g0111700	0.75218	-0.457457	--	--	--	POT family protein, expressed [Oryza sativa Japonica Group]
Os06g0288100	0.00114464	-1.77773	Molecular Function: protein kinase activity (GO:0004672);; Biological Process: protein phosphorylation (GO:0006468);; Biological Process: defense response (GO:0006952);; Biological Process: cell death (GO:0008219);; Cellular Component: intrinsic component of membrane (GO:0031224);; Molecular Function: purine ribonucleoside binding (GO:0032550);;	--	--	leucine-rich repeat receptor-like serine/threonine/tyrosine-protein kinase SOBIR1 [Oryza sativa Japonica Group]
Os03g0249200	0.278514	-0.438855	--	K15033|2.10609e-134|osa:4332255|peptidyl-tRNA hydrolase ICT1, mitochondrial	--	peptidyl-tRNA hydrolase ICT1, mitochondrial [Oryza sativa Japonica Group]
Os06g0648500	0.461491	0.495978	--	--	--	uncharacterized protein LOC4341675 [Oryza sativa Japonica Group]
Os07g0291750	0.0756441	-1.54374	--	--	--	Os07g0291750, partial [Oryza sativa Japonica Group]
Os10g0560900	0.47183	0.464435	--	K00652|0|osa:4349380|8-amino-7-oxononanoate synthase	Biotin metabolism (ko00780);; Biosynthesis of cofactors (ko01240)	8-amino-7-oxononanoate synthase [Oryza sativa Japonica Group]
Os01g0626400	0.151546	2.44028	--	--	--	WRKY transcription factor 71 [Oryza sativa Japonica Group]
Os09g0109600	2.46e-16	7.71772	--	--	--	uncharacterized protein LOC4346387 [Oryza sativa Japonica Group]
Os02g0700000	0.591474	0.386428	--	--	--	uncharacterized protein At1g51745 [Oryza sativa Japonica Group]
Os02g0697500	0.647352	-0.494869	--	--	--	Os02g0697500, partial [Oryza sativa Japonica Group]
Os07g0211400	0.086255	-0.799238	Molecular Function: phosphoprotein phosphatase activity (GO:0004721);; Biological Process: cellular protein modification process (GO:0006464);; Biological Process: phosphate-containing compound metabolic process (GO:0006796);; Biological Process: cell communication (GO:0007154);; Biological Process: meristem structural organization (GO:0009933);; Molecular Function: transferase activity, transfer…	--	--	protein phosphatase 2C 70 isoform X2 [Oryza sativa Japonica Group]
Os01g0727900	0.354414	0.806925	Cellular Component: intracellular membrane-bounded organelle (GO:0043231);;	--	--	uncharacterized protein LOC4323917 [Oryza sativa Japonica Group]
Os02g0232100	0.520275	0.428218	--	K10639|2.14026e-28|osa:4328810|E3 ubiquitin-protein ligase CCNB1IP1 homolog isoform X1	--	Os02g0232100, partial [Oryza sativa Japonica Group]
Os06g0115300	0.747661	-0.26013	--	--	--	acyl-CoA-binding domain-containing protein 2-like [Oryza sativa Japonica Group]
Os01g0823600	0.0769813	-1.50756	Molecular Function: nucleic acid binding (GO:0003676);; Biological Process: transcription, DNA-templated (GO:0006351);; Cellular Component: intracellular membrane-bounded organelle (GO:0043231);; Molecular Function: transition metal ion binding (GO:0046914);;	--	--	uncharacterized protein LOC4327573 [Oryza sativa Japonica Group]
Os03g0164700	0.704313	-0.294479	Biological Process: phosphate-containing compound metabolic process (GO:0006796);; Molecular Function: transferase activity, transferring phosphorus-containing groups (GO:0016772);; Cellular Component: intracellular membrane-bounded organelle (GO:0043231);;	--	--	probable fructokinase-4 [Oryza sativa Japonica Group]
Os02g0829400	0.0241993	-0.874589	--	K19022|0|osa:4331238|uncharacterized protein LOC4331238	--	uncharacterized protein LOC4331238 [Oryza sativa Japonica Group]
Os03g0328900	0.0452712	-0.989564	--	--	--	zinc finger CCCH domain-containing protein 22 isoform X1 [Oryza sativa Japonica Group]
Os04g0583101	0.30054	-0.621206	Biological Process: plastid organization (GO:0009657);;	--	--	pentatricopeptide repeat-containing protein At5g13770, chloroplastic [Oryza sativa Japonica Group]
Os04g0497900	0.729935	-0.243356	Biological Process: developmental process involved in reproduction (GO:0003006);; Biological Process: multicellular organism development (GO:0007275);; Cellular Component: plastid (GO:0009536);;	--	--	hypothetical protein OsJ_04181 [Oryza sativa Japonica Group]
Os04g0560700	0.0809845	-0.808793	--	--	--	Os04g0560700, partial [Oryza sativa Japonica Group]
Os05g0377000	0.913794	-0.0805718	Biological Process: fatty acid metabolic process (GO:0006631);; Cellular Component: intrinsic component of membrane (GO:0031224);; Cellular Component: intracellular membrane-bounded organelle (GO:0043231);;	K03955|1.36577e-59|osa:4338621|acyl carrier protein 2, mitochondrial	Oxidative phosphorylation (ko00190)	hypothetical protein [Oryza sativa Japonica Group]
Os04g0581400	0.793652	0.404763	Molecular Function: nucleic acid binding (GO:0003676);; Biological Process: transcription, DNA-templated (GO:0006351);; Cellular Component: intracellular membrane-bounded organelle (GO:0043231);;	--	--	LOW QUALITY PROTEIN: B3 domain-containing protein Os04g0581400-like [Oryza sativa Japonica Group]
Os01g0627500	0.58824	0.586152	--	--	--	cytochrome P450 72A15 [Oryza sativa Japonica Group]
Os12g0105401	0.566461	-0.57032	--	--	--	protein CHUP1, chloroplastic isoform X2 [Oryza sativa Japonica Group]
Os06g0649000	0.354091	-2.13405	--	--	--	Os06g0649000, partial [Oryza sativa Japonica Group]
Os02g0697600	0.274634	0.711212	--	K17681|0|osa:4330409|ATPase family AAA domain-containing protein 3-B	--	ATPase family AAA domain-containing protein 3-B [Oryza sativa Japonica Group]
Os07g0673400	0.230728	1.63231	--	--	--	universal stress protein PHOS34 [Oryza sativa Japonica Group]
Os05g0148600	0.563972	-0.282575	Molecular Function: monovalent cation:proton antiporter activity (GO:0005451);; Biological Process: sodium ion transport (GO:0006814);; Biological Process: proton transport (GO:0015992);; Cellular Component: intrinsic component of membrane (GO:0031224);; Biological Process: monovalent inorganic cation homeostasis (GO:0055067);;	--	--	sodium/hydrogen exchanger 2 [Oryza sativa Japonica Group]
Os04g0499200	0.0665471	-1.78966	Biological Process: pyrimidine nucleotide metabolic process (GO:0006220);; Biological Process: translation (GO:0006412);; Biological Process: Notch signaling pathway (GO:0007219);; Molecular Function: translation factor activity, RNA binding (GO:0008135);; Cellular Component: intracellular membrane-bounded organelle (GO:0043231);;	--	--	Os04g0499200, partial [Oryza sativa Japonica Group]
Os11g0121400	0.722372	-0.262709	Molecular Function: protein kinase activity (GO:0004672);; Biological Process: cellular protein modification process (GO:0006464);; Biological Process: phosphate-containing compound metabolic process (GO:0006796);; Cellular Component: membrane (GO:0016020);; Molecular Function: purine ribonucleoside binding (GO:0032550);;	--	--	probable serine/threonine-protein kinase PBL8 isoform X1 [Oryza sativa Japonica Group]
Os06g0114366	0.757709	-0.46906	--	--	--	pentatricopeptide repeat-containing protein At1g08070, chloroplastic [Oryza sativa Japonica Group]
Os06g0700500	0.0223445	1.53943	Molecular Function: UDP-glycosyltransferase activity (GO:0008194);; Cellular Component: intrinsic component of membrane (GO:0031224);;	--	--	uncharacterized protein LOC4341964 isoform X1 [Oryza sativa Japonica Group]
Os10g0112500	0.0182706	-2.07079	--	--	--	protein NRT1/ PTR FAMILY 8.3 [Oryza sativa Japonica Group]
Os04g0640800	0.128228	0.787302	--	K14801|0|osa:4337167|programmed cell death protein 2-like isoform X1	--	programmed cell death protein 2-like isoform X1 [Oryza sativa Japonica Group]
Os11g0131300	0.576808	1.20896	Biological Process: protein modification by small protein conjugation (GO:0032446);; Molecular Function: transition metal ion binding (GO:0046914);;	--	--	Os11g0131300 [Oryza sativa Japonica Group]
Os08g0359100	0.0201402	0.910081	--	K18693|0|osa:4345366|lipid phosphate phosphatase 2	Glycerolipid metabolism (ko00561);; Glycerophospholipid metabolism (ko00564)	hypothetical protein OsJ_27038 [Oryza sativa Japonica Group]
Os05g0569000	0.73792	-0.251447	--	--	--	Os05g0569000, partial [Oryza sativa Japonica Group]
Os08g0511400	0.632069	-0.772882	--	--	--	uncharacterized protein LOC4346009 [Oryza sativa Japonica Group]
Os01g0932550	0.749517	-0.165143	Cellular Component: mitochondrial envelope (GO:0005740);; Biological Process: protein localization (GO:0008104);; Molecular Function: protein transmembrane transporter activity (GO:0008320);; Cellular Component: organelle inner membrane (GO:0019866);; Molecular Function: transition metal ion binding (GO:0046914);; Biological Process: establishment of localization (GO:0051234);;	--	--	Os01g0932550 [Oryza sativa Japonica Group]
Os04g0583900	8.16e-05	6.15644	Molecular Function: nucleic acid binding (GO:0003676);; Biological Process: transcription, DNA-templated (GO:0006351);; Cellular Component: intracellular membrane-bounded organelle (GO:0043231);;	--	--	hypothetical protein OsJ_15918 [Oryza sativa Japonica Group]
Os04g0431700	0.521125	-0.490248	--	--	--	uncharacterized protein LOC9268705 isoform X2 [Oryza sativa Japonica Group]
Os02g0697450	0.00143857	-2.45915	--	K01904|0|osa:4330407|probable 4-coumarate--CoA ligase 2	Ubiquinone and other terpenoid-quinone biosynthesis (ko00130);; Phenylpropanoid biosynthesis (ko00940)	hypothetical protein OsJ_08027 [Oryza sativa Japonica Group]
Os06g0701100	0.0150565	1.02619	--	K03257|0|osa:4341966|eukaryotic initiation factor 4A-1	RNA transport (ko03013)	eukaryotic initiation factor 4A-1 [Oryza sativa Japonica Group]
Os12g0157200	0.495641	0.572401	Molecular Function: metal ion binding (GO:0046872);;	--	--	TLD domain-containing protein 1 isoform X2 [Oryza sativa Japonica Group]
Os02g0322400	0.0312417	-1.81858	--	--	--	mitogen-activated protein kinase kinase kinase 18 [Oryza sativa Japonica Group]
Os02g0721700	0.160898	-1.17071	Cellular Component: intrinsic component of membrane (GO:0031224);;	--	--	GPI-anchored protein LLG1 [Oryza sativa Japonica Group]
Os01g0602200	0.167174	-0.813322	--	--	--	cytochrome P450 72A15 [Oryza sativa Japonica Group]
Os07g0499300	0.899091	-0.181397	Biological Process: protein metabolic process (GO:0019538);; Molecular Function: peptidase activity, acting on L-amino acid peptides (GO:0070011);;	--	--	hypothetical protein OsJ_24346 [Oryza sativa Japonica Group]
Os10g0431000	0.655449	0.325068	Cellular Component: intracellular membrane-bounded organelle (GO:0043231);; Molecular Function: transition metal ion binding (GO:0046914);; Molecular Function: organic cyclic compound binding (GO:0097159);;	K10624|0|osa:4348695|E3 ubiquitin-protein ligase RBBP6 isoform X1	--	Os10g0431000, partial [Oryza sativa Japonica Group]
Os11g0106100	0.636202	0.538597	--	--	--	probable transcription factor RL9 isoform X1 [Oryza sativa Japonica Group]
Os04g0501800	0.884613	-0.125775	Cellular Component: intrinsic component of membrane (GO:0031224);;	--	--	uncharacterized protein LOC4336313 [Oryza sativa Japonica Group]
Os07g0673100	0.0898376	1.26026	--	K14842|3.442e-180|osa:4344253|ribosome biogenesis protein NSA2 homolog	--	ribosome biogenesis protein NSA2 homolog [Oryza sativa Japonica Group]
Os05g0571700	0.88983	0.0806248	Cellular Component: intracellular membrane-bounded organelle (GO:0043231);;	--	--	F-box/LRR-repeat protein At4g14096 [Oryza sativa Japonica Group]
Os05g0148700	0.455243	-0.628967	Biological Process: developmental process involved in reproduction (GO:0003006);; Biological Process: response to oxidative stress (GO:0006979);; Cellular Component: plastid (GO:0009536);; Biological Process: cellular metabolic process (GO:0044237);; Biological Process: leaf development (GO:0048366);;	--	--	senescence-associated protein OSA15, chloroplastic [Oryza sativa Japonica Group]
Os04g0563300	0.926936	-0.118746	--	--	--	H0409D10.1 [Oryza sativa]
Os08g0512900	0.921771	0.070271	Cellular Component: intrinsic component of membrane (GO:0031224);; Cellular Component: intracellular membrane-bounded organelle (GO:0043231);;	--	--	uncharacterized protein LOC4346018 [Oryza sativa Japonica Group]
Os03g0248225	0.907682	0.0957607	Molecular Function: oxidoreductase activity (GO:0016491);; Cellular Component: intrinsic component of membrane (GO:0031224);; Biological Process: single-organism metabolic process (GO:0044710);; Molecular Function: tetrapyrrole binding (GO:0046906);; Molecular Function: transition metal ion binding (GO:0046914);;	--	--	geraniol 8-hydroxylase isoform X1 [Oryza sativa Japonica Group]
Os08g0510800	0.129111	-2.41249	--	--	--	uncharacterized protein LOC4346004 [Oryza sativa Japonica Group]
Os07g0669250	0.00020708	2.73072	Cellular Component: plastid (GO:0009536);; Biological Process: plastid organization (GO:0009657);; Molecular Function: nucleoside-triphosphatase activity (GO:0017111);; Molecular Function: purine ribonucleoside binding (GO:0032550);; Molecular Function: metal ion binding (GO:0046872);;	--	--	Os07g0669250 [Oryza sativa Japonica Group]
Os01g0728150	0.896817	-0.126821	Cellular Component: intrinsic component of membrane (GO:0031224);;	--	--	Os01g0728150 [Oryza sativa Japonica Group]
Os10g0178200	0.25783	0.78979	Cellular Component: intrinsic component of membrane (GO:0031224);;	--	--	uncharacterized protein LOC4348199 [Oryza sativa Japonica Group]
Os10g0466700	0.0610394	0.985864	--	--	--	Os03g0139100, partial [Oryza sativa Japonica Group]
Os06g0116800	0.391869	0.414825	--	K03686|0|osa:4339933|chaperone protein DnaJ	--	chaperone protein dnaJ GFA2, mitochondrial [Oryza sativa Japonica Group]
Os10g0559400	0.939064	-0.0997375	--	--	--	putative ethylene-forming enzyme [Oryza sativa Japonica Group]
Os01g0727820	0.069902	1.64848	Molecular Function: endopeptidase activity (GO:0004175);; Biological Process: protein metabolic process (GO:0019538);;	--	--	subtilisin-like protease SBT5.6 [Oryza sativa Japonica Group]
Os03g0132000	0.113167	1.14757	Molecular Function: catalytic activity (GO:0003824);; Cellular Component: intrinsic component of membrane (GO:0031224);; Molecular Function: purine ribonucleoside binding (GO:0032550);;	K10526|0|osa:4331515|4-coumarate--CoA ligase-like 4	alpha-Linolenic acid metabolism (ko00592)	4-coumarate--CoA ligase-like 4 [Oryza sativa Japonica Group]
Os10g0110800	0.598696	-0.558588	Biological Process: peptide transport (GO:0015833);; Cellular Component: intrinsic component of membrane (GO:0031224);;	--	--	protein NRT1/ PTR FAMILY 8.3 [Oryza sativa Japonica Group]
Os02g0687900	0.407291	-0.404658	Molecular Function: carboxypeptidase activity (GO:0004180);; Biological Process: proteolysis (GO:0006508);;	--	--	putative serine carboxypeptidase [Oryza sativa Japonica Group]
Os02g0828566	0.898316	-0.165817	--	K16221|4.92197e-77|osa:9272106|transcription factor TCP7	Circadian rhythm - plant (ko04712)	transcription factor TCP7 [Oryza sativa Japonica Group]
Os02g0689900	0.980888	0.0461871	--	--	--	protein NRT1/ PTR FAMILY 7.2 [Oryza sativa Japonica Group]
Os11g0683500	0.098093	0.877183	Molecular Function: hydrolase activity, hydrolyzing O-glycosyl compounds (GO:0004553);; Cellular Component: plastid outer membrane (GO:0009527);; Biological Process: primary metabolic process (GO:0044238);;	K21362|0|osa:4351127|beta-glucosidase-like SFR2, chloroplastic	Glycerolipid metabolism (ko00561)	beta-glucosidase-like SFR2, chloroplastic [Oryza sativa Japonica Group]
Os01g0932600	0.992169	-0.0082772	--	--	--	uncharacterized protein LOC4326821 isoform X2 [Oryza sativa Japonica Group]
Os06g0135900	0.0565762	2.49396	Biological Process: exocytosis (GO:0006887);; Biological Process: protein localization (GO:0008104);;	--	--	Os06g0135900 [Oryza sativa Japonica Group]
Os11g0105750	0.31692	-0.837651	Cellular Component: plastid outer membrane (GO:0009527);; Biological Process: chloroplast organization (GO:0009658);; Cellular Component: intrinsic component of membrane (GO:0031224);;	--	--	protein CHUP1, chloroplastic [Oryza sativa Japonica Group]
Os01g0329900	0.723338	0.550343	Molecular Function: hydrolase activity (GO:0016787);; Cellular Component: intrinsic component of membrane (GO:0031224);; Cellular Component: intracellular membrane-bounded organelle (GO:0043231);;	--	--	GDSL esterase/lipase At1g09390 [Oryza sativa Japonica Group]
Os04g0600000	0.000218217	3.41592	--	--	--	myb family transcription factor PHL11 isoform X1 [Oryza sativa Japonica Group]
Os02g0322251	0.720342	-0.654505	--	--	--	protein kinase-like [Oryza sativa Japonica Group]
Os09g0511600	0.103665	-0.944086	--	--	--	Os09g0511600 [Oryza sativa Japonica Group]
Os01g0327400	0.0254497	3.23067	--	K00430|0|osa:4326970|peroxidase 1	Phenylpropanoid biosynthesis (ko00940)	peroxidase 1 [Oryza sativa Japonica Group]
Os06g0115200	0.292802	-0.544286	--	--	--	uncharacterized membrane protein At1g75140 [Oryza sativa Japonica Group]
Os02g0775600	0.00575569	-2.57956	Molecular Function: cation binding (GO:0043169);;	--	--	zinc finger protein 8 [Oryza sativa Japonica Group]
Os06g0221200	0.162219	1.54332	Molecular Function: phospholipid binding (GO:0005543);; Molecular Function: metal ion binding (GO:0046872);;	K17098|0|osa:4340522|annexin D1	--	annexin D1 [Oryza sativa Japonica Group]
Os02g0776400	0.0191952	-1.20999	Molecular Function: nucleic acid binding transcription factor activity (GO:0001071);; Biological Process: transcription, DNA-templated (GO:0006351);;	K08064|8.94701e-142|osa:9270863|nuclear transcription factor Y subunit A-4 isoform X1	--	nuclear transcription factor Y subunit A-4 [Oryza sativa Japonica Group]
Os02g0175500	0.399322	0.608904	Molecular Function: UDP-glycosyltransferase activity (GO:0008194);; Cellular Component: intrinsic component of membrane (GO:0031224);;	--	--	uncharacterized protein LOC4328471 [Oryza sativa Japonica Group]
Os01g0855200	0.00207384	-2.16231	Molecular Function: antioxidant activity (GO:0016209);; Cellular Component: intracellular membrane-bounded organelle (GO:0043231);; Biological Process: cellular detoxification (GO:1990748);;	--	--	uncharacterized protein LOC4324827 [Oryza sativa Japonica Group]
Os06g0514700	0.878944	-0.118922	Biological Process: protein metabolic process (GO:0019538);; Molecular Function: peptidase activity, acting on L-amino acid peptides (GO:0070011);;	--	--	Os06g0514700, partial [Oryza sativa Japonica Group]
Os10g0560450	0.983828	-0.0167946	--	--	--	Os10g0560450, partial [Oryza sativa Japonica Group]
Os08g0433300	0.810456	0.311839	Cellular Component: intracellular membrane-bounded organelle (GO:0043231);;	--	--	uncharacterized protein LOC4345651 [Oryza sativa Japonica Group]
Os11g0132400	0.577764	0.977191	Cellular Component: intrinsic component of membrane (GO:0031224);;	--	--	hypothetical protein EE612_053328, partial [Oryza sativa]
Os06g0649700	0.162434	-1.15223	--	--	--	cytochrome b561, DM13 and DOMON domain-containing protein At5g54830 [Oryza sativa Japonica Group]
Os02g0180200	0.360831	0.473175	--	--	--	nucleoid-associated protein At2g24020, chloroplastic [Oryza sativa Japonica Group]
Os01g0600900	0.395974	-1.56535	--	K08912|1.09474e-173|osa:4324599|chlorophyll a-b binding protein 2, chloroplastic	Photosynthesis - antenna proteins (ko00196)	chlorophyll a-b binding protein 2, chloroplastic [Oryza sativa Japonica Group]
Os03g0769900	0.588958	0.580606	Cellular Component: intrinsic component of membrane (GO:0031224);; Cellular Component: intracellular membrane-bounded organelle (GO:0043231);;	--	--	protein PHLOEM PROTEIN 2-LIKE A10 [Oryza sativa Japonica Group]
Os01g0590700	0.404844	0.779089	Molecular Function: endopeptidase activity (GO:0004175);; Cellular Component: chloroplast (GO:0009507);; Cellular Component: membrane (GO:0016020);; Biological Process: protein metabolic process (GO:0019538);; Molecular Function: purine ribonucleoside binding (GO:0032550);; Cellular Component: intracellular organelle part (GO:0044446);;	--	--	hypothetical protein EE612_003812 [Oryza sativa]
Os01g0924000	0.315621	-0.741707	Molecular Function: structural molecule activity (GO:0005198);; Cellular Component: ribosome (GO:0005840);; Cellular Component: plastid (GO:0009536);; Biological Process: gene expression (GO:0010467);; Cellular Component: intrinsic component of membrane (GO:0031224);;	K02899|1.1251e-55|osa:4327257|50S ribosomal protein L27, chloroplastic	Ribosome (ko03010)	50S ribosomal protein L27, chloroplastic [Oryza sativa Japonica Group]
Os07g0438600	0.0421134	2.53153	--	--	--	subtilisin-like protease SBT5.4 [Oryza sativa Japonica Group]
Os08g0206400	0.138962	1.52331	Cellular Component: intrinsic component of membrane (GO:0031224);; Molecular Function: metal ion transmembrane transporter activity (GO:0046873);; Biological Process: cellular potassium ion transport (GO:0071804);;	K03549|0|osa:9270408|putative potassium transporter 12 isoform X1	--	putative potassium transporter 12 isoform X1 [Oryza sativa Japonica Group]
Os09g0281300	0.961938	-0.068822	Cellular Component: intrinsic component of membrane (GO:0031224);;	--	--	uncharacterized protein LOC4346612 [Oryza sativa Japonica Group]
Os12g0156866	5.37e-06	-1.94255	--	--	--	cationic amino acid transporter 6, chloroplastic [Oryza sativa Japonica Group]
Os11g0131200	0.0152963	1.35508	Cellular Component: plastid envelope (GO:0009526);; Cellular Component: intrinsic component of membrane (GO:0031224);;	K13347|1.95292e-139|osa:4349678|protein SYM1	Peroxisome (ko04146)	protein SYM1 [Oryza sativa Japonica Group]
Os04g0501700	0.938668	-0.0535759	Biological Process: nuclear division (GO:0000280);; Cellular Component: cytoplasm (GO:0005737);; Cellular Component: microtubule organizing center (GO:0005815);; Cellular Component: spindle (GO:0005819);; Biological Process: microtubule nucleation (GO:0007020);; Molecular Function: tubulin binding (GO:0015631);; Biological Process: cell cycle process (GO:0022402);;	K16569|0|osa:4336312|gamma-tubulin complex component 2	--	gamma-tubulin complex component 2 [Oryza sativa Japonica Group]
Os04g0498000	0.00196024	2.44859	--	--	--	Os04g0498000, partial [Oryza sativa Japonica Group]
Os10g0441900	0.705255	-0.532162	Molecular Function: protein kinase activity (GO:0004672);; Biological Process: cellular protein modification process (GO:0006464);; Biological Process: phosphate-containing compound metabolic process (GO:0006796);; Cellular Component: intrinsic component of membrane (GO:0031224);; Molecular Function: purine ribonucleoside binding (GO:0032550);;	--	--	lectin protein kinase, putative, expressed [Oryza sativa Japonica Group]
Os01g0626300	0.0979477	1.4532	--	K17771|6.73355e-28|osa:4326689|mitochondrial import receptor subunit TOM7-1	--	mitochondrial import receptor subunit TOM7-1 [Oryza sativa Japonica Group]
Os04g0136700	0.888017	-0.170938	Cellular Component: intracellular membrane-bounded organelle (GO:0043231);;	--	--	uncharacterized protein LOC4335011 [Oryza sativa Japonica Group]
Os08g0335500	0.600647	-0.359447	Molecular Function: protein kinase activity (GO:0004672);; Biological Process: cellular protein modification process (GO:0006464);; Biological Process: phosphate-containing compound metabolic process (GO:0006796);; Biological Process: catabolic process (GO:0009056);; Cellular Component: intrinsic component of membrane (GO:0031224);; Molecular Function: purine ribonucleoside binding (GO:0032550);;…	--	--	LEAF RUST 10 DISEASE-RESISTANCE LOCUS RECEPTOR-LIKE PROTEIN KINASE-like 2.1 isoform X2 [Oryza sativa Japonica Group]
Os11g0102200	0.794112	0.231925	--	K20715|0|osa:4349531|phototropin-1B	--	phototropin-1B isoform X2 [Oryza sativa Japonica Group]
Os04g0583000	0.94662	-0.0785544	Biological Process: plastid organization (GO:0009657);;	--	--	pentatricopeptide repeat-containing protein At5g13770, chloroplastic [Oryza sativa Japonica Group]
Os01g0897600	0.338674	-0.657337	--	K01188|0|osa:4325106|beta-glucosidase 4 isoform X2	Cyanoamino acid metabolism (ko00460);; Starch and sucrose metabolism (ko00500);; Phenylpropanoid biosynthesis (ko00940)	beta-glucosidase 4 isoform X2 [Oryza sativa Japonica Group]
Os02g0720900	0.963656	-0.0623167	--	--	--	Os02g0720900, partial [Oryza sativa Japonica Group]
Os08g0433100	0.720321	-0.217934	Cellular Component: intrinsic component of membrane (GO:0031224);;	--	--	putative transmembrane protein [Oryza sativa Japonica Group]
Os04g0231200	0.915789	0.160599	--	--	--	Os04g0231200, partial [Oryza sativa Japonica Group]
Os03g0133900	0.591046	-0.309828	--	K00640|0|osa:4331528|probable serine acetyltransferase 2	Cysteine and methionine metabolism (ko00270);; Sulfur metabolism (ko00920);; Carbon metabolism (ko01200);; Biosynthesis of amino acids (ko01230)	probable serine acetyltransferase 2 [Oryza sativa Japonica Group]
Os01g0328300	0.757352	-0.213175	--	--	--	F-box protein SKIP23 isoform X1 [Oryza sativa Japonica Group]
Os06g0132400	0.188569	-1.04412	--	--	--	hypothetical protein OsJ_20009 [Oryza sativa Japonica Group]
Os08g0266300	0.24552	-0.753873	Cellular Component: extracellular region (GO:0005576);; Cellular Component: plastid envelope (GO:0009526);; Cellular Component: plastid stroma (GO:0009532);;	--	--	Os08g0266300 [Oryza sativa Japonica Group]
Os11g0104300	2.02e-05	-2.9752	Biological Process: macromolecule metabolic process (GO:0043170);; Cellular Component: intracellular membrane-bounded organelle (GO:0043231);;	--	--	protein DWARF 53 [Oryza sativa Japonica Group]
Os04g0563000	0.896817	0.131565	Cellular Component: intrinsic component of membrane (GO:0031224);; Cellular Component: intracellular membrane-bounded organelle (GO:0043231);;	--	--	Os04g0563000, partial [Oryza sativa Japonica Group]
Os07g0570300	0.66435	-0.18971	--	K01408|0|osa:4343659|zinc-metallopeptidase, peroxisomal	--	insulin-degrading enzyme-like 1, peroxisomal [Oryza sativa Japonica Group]
Os07g0102150	0.990907	0.0433574	--	K03549|6.1429e-102|osa:4342173|potassium transporter 22	--	potassium transporter 22 [Oryza sativa Japonica Group]
Os06g0476900	0.61403	-0.695754	--	--	--	Os06g0476900, partial [Oryza sativa Japonica Group]
Os12g0106525	0.452702	-0.690901	--	--	--	Nodulin-like family protein, expressed [Oryza sativa Japonica Group]
Os09g0513500	0.0456699	-1.16569	--	K16223|3.56004e-80|osa:9268282|protein FLOWERING LOCUS T	Circadian rhythm - plant (ko04712)	protein FLOWERING LOCUS T isoform X2 [Oryza sativa Japonica Group]
Os05g0159100	0.246422	0.554617	--	--	--	Golgi apparatus membrane protein-like protein ECHIDNA isoform X2 [Oryza sativa Japonica Group]
Os06g0687400	0.93605	0.0766587	--	--	--	hypothetical protein OsI_24239 [Oryza sativa Indica Group]
Os01g0589800	0.344683	-0.69036	Cellular Component: intracellular membrane-bounded organelle (GO:0043231);;	--	--	light-harvesting complex-like protein OHP2, chloroplastic [Oryza sativa Japonica Group]
Os08g0508600	0.915327	-0.0967554	--	K14800|1.85485e-106|osa:4345991|pre-rRNA-processing protein TSR2	--	pre-rRNA-processing protein TSR2 [Oryza sativa Japonica Group]
Os12g0105200	0.0159226	1.19264	--	--	--	Os12g0105200, partial [Oryza sativa Japonica Group]
Os01g0506100	0.0455276	1.12394	Cellular Component: cytoplasm (GO:0005737);; Biological Process: abscisic acid-activated signaling pathway (GO:0009738);; Biological Process: seed germination (GO:0009845);; Cellular Component: intracellular membrane-bounded organelle (GO:0043231);;	--	--	pentatricopeptide repeat-containing protein At5g11310, mitochondrial [Oryza sativa Japonica Group]
Os02g0173900	0.0505604	1.93791	--	--	--	Os02g0173900 [Oryza sativa Japonica Group]
Os05g0271300	0.281152	0.664179	--	--	--	ribonuclease 3-like protein 2 isoform X3 [Oryza sativa Japonica Group]
Os12g0105850	0.322452	0.787864	Molecular Function: protein kinase activity (GO:0004672);; Biological Process: protein phosphorylation (GO:0006468);; Cellular Component: intrinsic component of membrane (GO:0031224);; Molecular Function: purine ribonucleoside binding (GO:0032550);;	--	--	protein MALE DISCOVERER 2 [Oryza sativa Japonica Group]
Os03g0111600	0.38419	0.601546	--	--	--	uncharacterized protein LOC4331365 isoform X1 [Oryza sativa Japonica Group]
Os12g0106900	0.403677	-0.382957	--	--	--	uncharacterized protein LOC4351271 [Oryza sativa Japonica Group]
Os12g0106700	0.799999	0.207944	--	--	--	Os12g0106700, partial [Oryza sativa Japonica Group]
Os06g0476200	0.0700175	-1.17264	--	--	--	uncharacterized protein LOC4341038 isoform X1 [Oryza sativa Japonica Group]
Os02g0830100	0.90054	-0.0900155	Molecular Function: endopeptidase activity (GO:0004175);; Cellular Component: plastid (GO:0009536);; Biological Process: protein metabolic process (GO:0019538);; Cellular Component: intrinsic component of membrane (GO:0031224);; Molecular Function: cation binding (GO:0043169);;	K01414|0|osa:4331244|probable cytosolic oligopeptidase A	--	probable cytosolic oligopeptidase A [Oryza sativa Japonica Group]
Os10g0561200	0.127082	2.09532	--	--	--	Os10g0561200, partial [Oryza sativa Japonica Group]
Os04g0431000	0.979417	-0.0255134	--	--	--	Os04g0431000, partial [Oryza sativa Japonica Group]
Os05g0244600	0.0989384	0.680545	--	K07466|7.95313e-80|osa:4338202|uncharacterized protein At4g28440	DNA replication (ko03030);; Nucleotide excision repair (ko03420);; Mismatch repair (ko03430);; Homologous recombination (ko03440)	Os05g0244600, partial [Oryza sativa Japonica Group]
Os05g0131900	0.0154048	0.991062	Cellular Component: intrinsic component of membrane (GO:0031224);;	--	--	uncharacterized protein LOC9270212 [Oryza sativa Japonica Group]
Os04g0600200	0.0100258	3.82228	--	K17893|0|osa:4336874|ubiquinol oxidase 2, mitochondrial	--	ubiquinol oxidase 1a, mitochondrial [Oryza sativa Japonica Group]
Os05g0159500	0.507693	0.551219	Molecular Function: hydrolase activity (GO:0016787);; Cellular Component: intrinsic component of membrane (GO:0031224);;	--	--	Os05g0159500 [Oryza sativa Japonica Group]
Os10g0147300	0.590496	0.447502	Molecular Function: nucleic acid binding transcription factor activity (GO:0001071);; Molecular Function: nucleic acid binding (GO:0003676);; Biological Process: transcription, DNA-templated (GO:0006351);; Cellular Component: intrinsic component of membrane (GO:0031224);; Cellular Component: intracellular membrane-bounded organelle (GO:0043231);;	--	--	Os10g0147300 [Oryza sativa Japonica Group]
Os01g0271700	0.195813	0.599314	--	--	--	Os01g0271700 [Oryza sativa Japonica Group]
Os11g0210300	0.0161943	3.42731	Molecular Function: oxidoreductase activity, acting on the CH-OH group of donors, NAD or NADP as acceptor (GO:0016616);; Cellular Component: intracellular part (GO:0044424);; Biological Process: single-organism metabolic process (GO:0044710);; Molecular Function: transition metal ion binding (GO:0046914);;	K18857|0|osa:4350053|alcohol dehydrogenase 1	Glycolysis / Gluconeogenesis (ko00010);; Fatty acid degradation (ko00071);; Tyrosine metabolism (ko00350);; alpha-Linolenic acid metabolism (ko00592);; Pyruvate metabolism (ko00620)	alcohol dehydrogenase 1 isoform X2 [Oryza sativa Japonica Group]
Os06g0133900	0.256623	1.15917	--	K00800|0|osa:4340026|3-phosphoshikimate 1-carboxyvinyltransferase 2	Phenylalanine, tyrosine and tryptophan biosynthesis (ko00400);; Biosynthesis of amino acids (ko01230)	EPSP synthase [Oryza sativa]
Os09g0514400	0.628375	0.353388	--	K05955|0|osa:4347566|protein farnesyltransferase/geranylgeranyltransferase type-1 subunit alpha	Terpenoid backbone biosynthesis (ko00900)	protein farnesyltransferase/geranylgeranyltransferase type-1 subunit alpha [Oryza sativa Japonica Group]
Os05g0375600	0.331329	-0.662809	--	--	--	Os05g0375600 [Oryza sativa Japonica Group]
Os07g0114300	0.73124	0.246342	--	--	--	uncharacterized protein At2g23090 [Oryza sativa Japonica Group]
Os10g0390100	0.822742	0.263247	Molecular Function: nucleic acid binding (GO:0003676);; Cellular Component: nuclear lumen (GO:0031981);; Biological Process: chemical homeostasis (GO:0048878);;	K14790|0|osa:4348523|pumilio homolog 23	--	pumilio homolog 23 [Oryza sativa Japonica Group]
Os03g0679000	0.415142	0.549122	--	K23335|8.51659e-155|osa:4333716|glucose-induced degradation protein 4 homolog	--	glucose-induced degradation protein 4 homolog [Oryza sativa Japonica Group]
Os06g0646600	0.0244436	-1.36275	--	--	--	homeobox protein knotted-1-like 11 isoform X1 [Oryza sativa Japonica Group]
Os01g0729900	0.247491	0.91714	--	--	--	hypothetical protein OsI_03611 [Oryza sativa Indica Group]
Os12g0104766	0.620642	0.349091	--	--	--	Os12g0104766 [Oryza sativa Japonica Group]
Os01g0894600	0.0664258	-1.4231	Molecular Function: catalytic activity (GO:0003824);; Cellular Component: intrinsic component of membrane (GO:0031224);; Cellular Component: intracellular membrane-bounded organelle (GO:0043231);; Molecular Function: transition metal ion binding (GO:0046914);;	--	--	zinc finger protein-like [Oryza sativa Japonica Group]
Os11g0130600	0.906802	0.201985	--	--	--	expressed protein [Oryza sativa Japonica Group]
Os10g0390500	0.00328632	4.10957	Biological Process: alanine catabolic process (GO:0006524);; Molecular Function: carbon-sulfur lyase activity (GO:0016846);; Molecular Function: anion binding (GO:0043168);; Molecular Function: alanine-oxo-acid transaminase activity (GO:0047635);;	K00814|0|osa:4348524|alanine aminotransferase 2	Arginine biosynthesis (ko00220);; Alanine, aspartate and glutamate metabolism (ko00250);; Carbon fixation in photosynthetic organisms (ko00710);; Carbon metabolism (ko01200);; 2-Oxocarboxylic acid metabolism (ko01210);; Biosynthesis of amino acids (ko01230)	alanine aminotransferase 2 [Oryza sativa Japonica Group]
Os01g0603500	0.195095	-0.87474	--	--	--	HcrVf1 protein-like [Oryza sativa Japonica Group]
Os01g0602800	0.0853479	-1.10759	--	--	--	hypothetical protein OsJ_02508 [Oryza sativa Japonica Group]
Os03g0739700	0.887645	0.326069	Cellular Component: intrinsic component of membrane (GO:0031224);;	--	--	uncharacterized protein LOC4334054 [Oryza sativa Japonica Group]
Os08g0290100	0.841829	-0.166479	--	K23345|0|osa:4345184|aberrant root formation protein 4	--	aberrant root formation protein 4 [Oryza sativa Japonica Group]
Os07g0101400	0.391051	-0.310136	--	K10523|0|osa:4342170|BTB/POZ and MATH domain-containing protein 3	--	BTB/POZ and MATH domain-containing protein 3 [Oryza sativa Japonica Group]
Os05g0585900	0.451433	0.404845	--	K14684|0|osa:4339755|mitochondrial adenine nucleotide transporter ADNT1	--	mitochondrial adenine nucleotide transporter ADNT1 [Oryza sativa Japonica Group]
Os03g0766000	0.676069	0.215032	Cellular Component: intrinsic component of membrane (GO:0031224);; Cellular Component: intracellular membrane-bounded organelle (GO:0043231);;	--	--	Os03g0766000, partial [Oryza sativa Japonica Group]
Os02g0700600	0.24664	-0.795398	--	K08829|0|osa:4330434|cyclin-dependent kinase F-4	--	cyclin-dependent kinase F-4 [Oryza sativa Japonica Group]
Os03g0330300	0.302375	-0.737874	--	--	--	serine/arginine repetitive matrix protein 1 isoform X2 [Oryza sativa Japonica Group]
Os02g0174200	0.975088	-0.0327389	--	--	--	serine/threonine-protein kinase STY13 [Oryza sativa Japonica Group]
Os05g0586050	0.00182903	2.14752	Cellular Component: intrinsic component of membrane (GO:0031224);;	--	--	Os05g0586050, partial [Oryza sativa Japonica Group]
Os01g0270100	0.0485083	1.50813	Molecular Function: endopeptidase inhibitor activity (GO:0004866);; Biological Process: response to stress (GO:0006950);; Biological Process: negative regulation of peptidase activity (GO:0010466);;	--	--	cysteine proteinase inhibitor 12 [Oryza sativa Japonica Group]
Os05g0133100	0.411411	-0.584573	Biological Process: transcription, DNA-templated (GO:0006351);; Biological Process: fatty acid biosynthetic process (GO:0006633);; Cellular Component: chloroplast (GO:0009507);; Biological Process: flavonoid biosynthetic process (GO:0009813);; Biological Process: phosphorylation (GO:0016310);; Molecular Function: kinase regulator activity (GO:0019207);; Biological Process: nitrogen utilization (G…	--	--	hypothetical protein EE612_026912 [Oryza sativa]
Os02g0699400	0.102324	-0.9234	--	--	--	Os02g0699400 [Oryza sativa Japonica Group]
Os01g0603000	0.642662	0.374341	--	K13199|3.88619e-116|osa:4324091|plasminogen activator inhibitor 1 RNA-binding protein	--	RGG repeats nuclear RNA binding protein A [Oryza sativa Japonica Group]
Os08g0361000	0.964621	0.0272788	Molecular Function: nucleic acid binding (GO:0003676);; Molecular Function: cation binding (GO:0043169);; Cellular Component: intracellular membrane-bounded organelle (GO:0043231);;	--	--	AT-rich interactive domain-containing protein 4 isoform X1 [Oryza sativa Japonica Group]
Os03g0679300	0.611953	-0.255439	--	--	--	probable ubiquitin-conjugating enzyme E2 25 isoform X2 [Oryza sativa Japonica Group]
Os07g0632600	0.993837	0.00531803	Cellular Component: intrinsic component of membrane (GO:0031224);;	--	--	uncharacterized protein LOC4344004 isoform X2 [Oryza sativa Japonica Group]
Os07g0571700	0.38513	0.805757	--	--	--	organic cation/carnitine transporter 7 [Oryza sativa Japonica Group]
Os02g0180500	0.623714	-0.37243	Biological Process: cellular amino acid biosynthetic process (GO:0008652);; Molecular Function: intramolecular transferase activity (GO:0016866);; Biological Process: dicarboxylic acid metabolic process (GO:0043648);;	K01850|1.00405e-149|osa:4328508|chorismate mutase 2	Phenylalanine, tyrosine and tryptophan biosynthesis (ko00400);; Biosynthesis of amino acids (ko01230)	chorismate mutase 2 [Oryza sativa Japonica Group]
Os06g0493800	0.857997	-0.21181	--	--	--	Os06g0493800, partial [Oryza sativa Japonica Group]
Os12g0105800	0.871194	-0.136128	Molecular Function: protein kinase activity (GO:0004672);; Biological Process: protein phosphorylation (GO:0006468);; Cellular Component: intrinsic component of membrane (GO:0031224);; Molecular Function: purine ribonucleoside binding (GO:0032550);;	--	--	protein kinase family protein, putative, expressed [Oryza sativa Japonica Group]
Os10g0389300	0.0270792	-1.03839	--	--	--	Os10g0389300, partial [Oryza sativa Japonica Group]
Os02g0722800	0.889683	-0.0678945	Cellular Component: intracellular membrane-bounded organelle (GO:0043231);;	K12616|0|osa:4330568|enhancer of mRNA-decapping protein 4	RNA degradation (ko03018)	enhancer of mRNA-decapping protein 4 [Oryza sativa Japonica Group]
Os11g0106700	0.354414	0.914103	Biological Process: transition metal ion transport (GO:0000041);; Molecular Function: iron ion binding (GO:0005506);; Cellular Component: plastid (GO:0009536);; Molecular Function: oxidoreductase activity, oxidizing metal ions, oxygen as acceptor (GO:0016724);; Biological Process: single-organism metabolic process (GO:0044710);; Biological Process: cellular transition metal ion homeostasis (GO:00…	--	--	Ferritin 1, chloroplast precursor, putative, expressed [Oryza sativa Japonica Group]
Os10g0124700	0.0843825	-0.880958	--	--	--	MEIOTIC F-BOX protein MOF-like [Oryza sativa Japonica Group]
Os03g0134300	0.969678	0.0405406	--	K00765|0|osa:4331530|ATP phosphoribosyltransferase, chloroplastic	Histidine metabolism (ko00340);; Biosynthesis of amino acids (ko01230)	ATP phosphoribosyltransferase, chloroplastic [Oryza sativa Japonica Group]
Os04g0431800	0.892632	0.0987025	Cellular Component: intracellular membrane-bounded organelle (GO:0043231);;	--	--	uncharacterized protein LOC4335876 [Oryza sativa Japonica Group]
Os01g0502800	0.787748	-0.246429	Molecular Function: small molecule binding (GO:0036094);; Molecular Function: organic cyclic compound binding (GO:0097159);;	--	--	glycine-rich RNA-binding protein 4, mitochondrial isoform X1 [Oryza sativa Japonica Group]
Os05g0568900	0.305989	-0.858506	Molecular Function: endopeptidase activity (GO:0004175);; Biological Process: protein metabolic process (GO:0019538);; Cellular Component: intracellular membrane-bounded organelle (GO:0043231);;	--	--	protease Do-like 1, chloroplastic [Oryza sativa Japonica Group]
Os02g0734300	0.565407	-0.473481	Molecular Function: catalytic activity (GO:0003824);; Cellular Component: intracellular membrane-bounded organelle (GO:0043231);;	K07766|2.67679e-102|osa:4330642|nudix hydrolase 21, chloroplastic	--	nudix hydrolase 21, chloroplastic [Oryza sativa Japonica Group]
Os01g0929100	0.478137	-0.661765	Biological Process: response to stress (GO:0006950);; Cellular Component: chloroplast thylakoid (GO:0009534);; Cellular Component: intrinsic component of membrane (GO:0031224);;	--	--	unknown protein [Oryza sativa Japonica Group]
Os02g0831600	0.902588	-0.143542	Biological Process: gene silencing (GO:0016458);; Molecular Function: organic cyclic compound binding (GO:0097159);;	K11593|0|osa:4331253|protein argonaute 1C	--	hypothetical protein OsI_09567 [Oryza sativa Indica Group]
Os05g0501700	0.0312809	2.0962	Cellular Component: intracellular membrane-bounded organelle (GO:0043231);; Biological Process: response to stimulus (GO:0050896);;	--	--	universal stress protein PHOS32 isoform X2 [Oryza sativa Japonica Group]
Os04g0599000	0.224859	1.1173	--	--	--	wall-associated receptor kinase 5 [Oryza sativa Japonica Group]
Os06g0113950	0.752973	0.338992	--	--	--	hypothetical protein OsJ_19882 [Oryza sativa Japonica Group]
Os02g0182200	0.494806	-0.49021	Molecular Function: nucleic acid binding transcription factor activity (GO:0001071);; Molecular Function: nucleic acid binding (GO:0003676);; Biological Process: transcription, DNA-templated (GO:0006351);; Biological Process: hormone-mediated signaling pathway (GO:0009755);; Biological Process: intracellular signal transduction (GO:0035556);; Cellular Component: intracellular membrane-bounded org…	K14491|0|osa:4328516|two-component response regulator ORR24	Plant hormone signal transduction (ko04075)	two-component response regulator ORR24 [Oryza sativa Japonica Group]
Os06g0297700	0.907967	0.179766	Cellular Component: intrinsic component of membrane (GO:0031224);; Cellular Component: intracellular membrane-bounded organelle (GO:0043231);;	--	--	uncharacterized protein LOC4340809 [Oryza sativa Japonica Group]
Os05g0586600	0.0335026	-1.12151	Molecular Function: core DNA-dependent RNA polymerase binding promoter specificity activity (GO:0000996);; Molecular Function: nucleic acid binding transcription factor activity (GO:0001071);; Molecular Function: nucleic acid binding (GO:0003676);; Biological Process: transcription, DNA-templated (GO:0006351);; Molecular Function: 5'-3' RNA polymerase activity (GO:0034062);; Cellular Component: i…	--	--	Os05g0586600, partial [Oryza sativa Japonica Group]
Os01g0603300	0.425815	-0.388866	--	--	--	transcription factor KUA1 [Oryza sativa Japonica Group]
Os02g0698100	0.814663	-0.161219	--	--	--	uncharacterized protein LOC4330414 [Oryza sativa Japonica Group]
Os03g0133500	0.0271527	1.42607	Molecular Function: catalytic activity (GO:0003824);;	--	--	probable acyl-activating enzyme 1, peroxisomal isoform X1 [Oryza sativa Japonica Group]
Os03g0767500	0.864548	0.138447	--	--	--	thioredoxin-like protein HCF164, chloroplastic [Oryza sativa Japonica Group]
Os01g0849950	0.0250703	-1.19142	--	--	--	Os01g0849950, partial [Oryza sativa Japonica Group]
Os08g0289400	0.725166	0.296582	Molecular Function: nucleoside-triphosphatase activity (GO:0017111);; Molecular Function: purine ribonucleoside binding (GO:0032550);;	--	--	Os08g0289400, partial [Oryza sativa Japonica Group]
Os05g0501300	0.944661	0.101614	Molecular Function: catalytic activity (GO:0003824);; Biological Process: transcription, DNA-templated (GO:0006351);; Molecular Function: ribonucleotide binding (GO:0032553);; Biological Process: single-organism metabolic process (GO:0044710);;	K03809|2.92035e-133|osa:4339236|NAD(P)H dehydrogenase (quinone) FQR1	Ubiquinone and other terpenoid-quinone biosynthesis (ko00130);; Biosynthesis of cofactors (ko01240)	NAD(P)H dehydrogenase (quinone) FQR1 [Oryza sativa Japonica Group]
Os01g0589700	0.905925	0.10952	--	--	--	Os01g0589700, partial [Oryza sativa Japonica Group]
Os06g0334600	0.704852	-0.317244	Cellular Component: intracellular membrane-bounded organelle (GO:0043231);;	--	--	Os06g0334600 [Oryza sativa Japonica Group]
Os01g0627550	0.996784	0.00643554	--	--	--	cytochrome P450 72A15 [Oryza sativa Japonica Group]
Os02g0232900	0.81273	0.513784	--	K09874|1.40082e-173|osa:4328814|aquaporin NIP1-1	--	aquaporin NIP1-1 [Oryza sativa Japonica Group]
Os06g0552300	0.958504	-0.0344876	Molecular Function: nucleic acid binding transcription factor activity (GO:0001071);; Molecular Function: nucleic acid binding (GO:0003676);; Biological Process: transcription, DNA-templated (GO:0006351);; Biological Process: growth (GO:0040007);; Biological Process: steroid hormone mediated signaling pathway (GO:0043401);;	--	--	protein BZR1 homolog 3 [Oryza sativa Japonica Group]
Os12g0106600	0.282875	-0.934641	--	--	--	Os12g0106600, partial [Oryza sativa Japonica Group]
Os08g0290400	0.943891	0.039669	--	--	--	uncharacterized protein LOC4345185 [Oryza sativa Japonica Group]
Os01g0850700	0.272338	1.77074	--	K05909|0|osa:4324802|laccase-7	--	laccase-7 [Oryza sativa Japonica Group]
Os04g0498200	0.95775	0.0414379	Molecular Function: electron carrier activity (GO:0009055);; Biological Process: proton transport (GO:0015992);; Cellular Component: intracellular membrane-bounded organelle (GO:0043231);;	K02267|1.24839e-49|osa:4336292|cytochrome c oxidase subunit 6b-2	Oxidative phosphorylation (ko00190)	PREDICTED: cytochrome c oxidase subunit 6b-2-like [Oryza brachyantha]
Os07g0634200	0.999452	0.00140805	Cellular Component: membrane (GO:0016020);; Molecular Function: purine ribonucleoside binding (GO:0032550);; Biological Process: intracellular signal transduction (GO:0035556);; Cellular Component: vacuolar part (GO:0044437);;	K07904|2.24072e-158|osa:4344016|ras-related protein RABA5a	Endocytosis (ko04144)	ras-related protein RABA5a [Oryza sativa Japonica Group]
Os04g0501000	0.0365924	0.981987	--	K02893|1.17625e-67|osa:4336307|60S ribosomal protein L23A	Ribosome (ko03010)	60S ribosomal protein L23A [Oryza sativa Japonica Group]
Os02g0831300	0.24686	0.499262	--	K12864|0|osa:4331250|beta-catenin-like protein 1	Spliceosome (ko03040)	beta-catenin-like protein 1 [Oryza sativa Japonica Group]
Os01g0560200	0.620037	0.33883	--	K08493|1.40632e-142|osa:4324687|vesicle transport v-SNARE 13	SNARE interactions in vesicular transport (ko04130)	vesicle transport v-SNARE 13 [Oryza sativa Japonica Group]
Os12g0226900	0.0509492	-1.54294	Molecular Function: catalytic activity (GO:0003824);; Biological Process: single-organism metabolic process (GO:0044710);; Molecular Function: transition metal ion binding (GO:0046914);;	--	--	2-alkenal reductase (NADP(+)-dependent) [Oryza sativa Japonica Group]
Os02g0175000	0.678817	-0.41568	--	--	--	probable cation transporter HKT6 [Oryza sativa Japonica Group]
Os07g0572000	0.168174	1.20502	--	K14963|0|osa:4343672|COMPASS-like H3K4 histone methylase component WDR5B	--	COMPASS-like H3K4 histone methylase component WDR5B [Oryza sativa Japonica Group]
Os06g0488600	0.89859	-0.0850129	--	K01530|0|osa:4341075|putative phospholipid-transporting ATPase 9	--	putative phospholipid-transporting ATPase 9 [Oryza sativa Japonica Group]
Os10g0124100	0.573307	-0.358347	--	--	--	uncharacterized protein LOC4348008 [Oryza sativa Japonica Group]
Os02g0689550	0.613383	-0.343411	--	--	--	serine/arginine repetitive matrix protein 1 [Oryza sativa Japonica Group]
Os07g0162300	0.0224957	1.00152	--	--	--	Os07g0162300 [Oryza sativa Japonica Group]
Os02g0224400	0.516339	0.38384	Molecular Function: exopeptidase activity (GO:0008238);; Biological Process: protein metabolic process (GO:0019538);; Cellular Component: intracellular membrane-bounded organelle (GO:0043231);; Molecular Function: transition metal ion binding (GO:0046914);;	K14213|0|osa:4328771|xaa-Pro dipeptidase	--	xaa-Pro dipeptidase [Oryza sativa Japonica Group]
Os07g0101300	0.892975	0.0905544	--	--	--	Os07g0101300 [Oryza sativa Japonica Group]
Os04g0270100	0.348556	0.397113	--	K03267|0|osa:4335338|eukaryotic peptide chain release factor GTP-binding subunit ERF3A	mRNA surveillance pathway (ko03015)	eukaryotic peptide chain release factor GTP-binding subunit ERF3A [Oryza sativa Japonica Group]
Os05g0587400	0.818718	-0.255616	--	--	--	uncharacterized protein LOC4339766 [Oryza sativa Japonica Group]
Os05g0571100	0.980757	-0.0311557	--	--	--	hypothetical protein OsI_21059 [Oryza sativa Indica Group]
Os12g0406100	0.0356496	1.91714	Molecular Function: structural molecule activity (GO:0005198);; Biological Process: gene expression (GO:0010467);; Molecular Function: hydrolase activity, acting on glycosyl bonds (GO:0016798);; Cellular Component: intracellular ribonucleoprotein complex (GO:0030529);; Cellular Component: intrinsic component of membrane (GO:0031224);; Cellular Component: intracellular membrane-bounded organelle (…	--	--	hypothetical protein OsJ_35850 [Oryza sativa Japonica Group]
Os06g0239700	0.796032	0.163526	Cellular Component: intrinsic component of membrane (GO:0031224);; Cellular Component: intracellular membrane-bounded organelle (GO:0043231);;	--	--	Os06g0239700, partial [Oryza sativa Japonica Group]
Os03g0591000	0.914823	0.143413	--	--	--	hypothetical protein [Oryza sativa Japonica Group]
Os01g0823300	0.0348165	0.920797	--	K02976|1.09897e-39|sbi:8076999|40S ribosomal protein S26	Ribosome (ko03010)	putative 40S ribosomal protein S26 [Oryza sativa Japonica Group]
Os02g0697400	0.00021042	-2.47425	--	K01904|0|osa:4330407|probable 4-coumarate--CoA ligase 2	Ubiquinone and other terpenoid-quinone biosynthesis (ko00130);; Phenylpropanoid biosynthesis (ko00940)	probable 4-coumarate--CoA ligase 2 [Oryza sativa Japonica Group]
Os07g0634400	0.428827	0.881113	Molecular Function: catalytic activity (GO:0003824);;	K07025|5.49928e-155|osa:4344018|uncharacterized protein LOC4344018	--	uncharacterized protein LOC4344018 [Oryza sativa Japonica Group]
Os01g0388000	0.590524	1.33276	--	--	--	Os01g0388000 [Oryza sativa Japonica Group]
Os01g0498200	0.687962	-0.266434	--	--	--	hypothetical protein OsI_02076 [Oryza sativa Indica Group]
Os06g0687800	0.700576	0.21344	--	K12483|0|osa:4341894|EH domain-containing protein 1	Endocytosis (ko04144)	EH domain-containing protein 1 [Oryza sativa Japonica Group]
Os07g0102300	0.265241	-0.461709	--	--	--	uncharacterized GPI-anchored protein At1g61900 [Oryza sativa Japonica Group]
Os03g0163300	0.712874	-0.215689	Molecular Function: nucleotide binding (GO:0000166);; Biological Process: generation of precursor metabolites and energy (GO:0006091);; Biological Process: sulfur compound metabolic process (GO:0006790);; Molecular Function: glutathione disulfide oxidoreductase activity (GO:0015038);; Molecular Function: oxidoreductase activity, acting on NAD(P)H (GO:0016651);; Biological Process: cellular homeos…	K00383|0|osa:4331719|glutathione reductase, chloroplastic	Glutathione metabolism (ko00480)	glutathione reductase, chloroplastic [Oryza sativa Japonica Group]
Os09g0512700	0.664006	0.282179	Cellular Component: intracellular membrane-bounded organelle (GO:0043231);;	K09562|0|osa:4347551|uncharacterized protein LOC4347551	Protein processing in endoplasmic reticulum (ko04141)	uncharacterized protein LOC4347551 [Oryza sativa Japonica Group]
Os02g0722500	0.581089	-0.24462	Molecular Function: enzyme activator activity (GO:0008047);; Biological Process: regulation of GTPase activity (GO:0043087);;	K12486|0|osa:4330565|ADP-ribosylation factor GTPase-activating protein AGD12	Endocytosis (ko04144)	ADP-ribosylation factor GTPase-activating protein AGD12 [Oryza sativa Japonica Group]
Os07g0159800	0.265969	0.821963	--	--	--	MD-2-related lipid-recognition protein ROSY1 [Oryza sativa Japonica Group]
Os07g0160500	0.789415	-0.302338	--	--	--	F-box/LRR-repeat protein 13 [Oryza sativa Japonica Group]
Os02g0109900	0.259811	-0.616282	Cellular Component: plastid (GO:0009536);; Biological Process: chloroplast organization (GO:0009658);; Biological Process: plastid membrane organization (GO:0009668);; Cellular Component: intrinsic component of membrane (GO:0031224);; Biological Process: anatomical structure development (GO:0048856);;	--	--	uncharacterized protein LOC4328038 isoform X1 [Oryza sativa Japonica Group]
Os11g0681400	0.171503	-1.58725	--	--	--	Os11g0681400, partial [Oryza sativa Japonica Group]
Os02g0730700	0.427623	0.480207	--	--	--	hypothetical protein OsI_08807 [Oryza sativa Indica Group]
Os02g0111500	0.336179	-0.732766	--	--	--	wall-associated receptor kinase 5 [Oryza sativa Japonica Group]
Os06g0700700	0.00537751	4.07926	--	K01534|0|osa:4341965|cadmium/zinc-transporting ATPase HMA3	--	cadmium/zinc-transporting ATPase HMA2 [Oryza sativa Japonica Group]
Os11g0264300	0.71182	-0.191878	Cellular Component: intrinsic component of membrane (GO:0031224);;	--	--	RWP-RK domain, putative [Oryza sativa Japonica Group]
Os08g0506700	0.040547	-1.22649	--	--	--	transcription factor bHLH130 [Oryza sativa Japonica Group]
Os07g0633200	0.0023456	2.50653	Molecular Function: small molecule binding (GO:0036094);; Cellular Component: intracellular membrane-bounded organelle (GO:0043231);; Molecular Function: organic cyclic compound binding (GO:0097159);;	K12900|2.38923e-47|osa:4344009|serine/arginine-rich SC35-like splicing factor SCL33 isoform X1	Spliceosome (ko03040)	hypothetical protein OsI_26989 [Oryza sativa Indica Group]
Os08g0434632	0.0845156	-2.03303	Molecular Function: transferase activity (GO:0016740);; Cellular Component: intrinsic component of membrane (GO:0031224);; Cellular Component: Golgi apparatus part (GO:0044431);; Biological Process: external encapsulating structure organization (GO:0045229);;	K13680|3.77918e-153|osa:4345658|probable mannan synthase 11 isoform X1	--	probable glucomannan 4-beta-mannosyltransferase 11 isoform X3 [Oryza sativa Japonica Group]
Os03g0109400	0.352783	-0.468502	Molecular Function: nucleic acid binding (GO:0003676);; Biological Process: transcription, DNA-templated (GO:0006351);; Cellular Component: intracellular membrane-bounded organelle (GO:0043231);;	K09338|0|osa:4331345|homeobox-leucine zipper protein HOX10	--	homeobox-leucine zipper protein HOX10 [Oryza sativa Japonica Group]
Os05g0550300	1.75e-11	7.28453	--	--	--	non-specific lipid-transfer protein 2 [Oryza sativa Japonica Group]
Os07g0570100	0.927091	0.0657485	--	--	--	Os07g0570100, partial [Oryza sativa Japonica Group]
Os02g0732900	0.600555	-0.430508	Molecular Function: nucleic acid binding (GO:0003676);; Cellular Component: intracellular membrane-bounded organelle (GO:0043231);;	--	--	APO protein 2, chloroplastic [Oryza sativa Japonica Group]
Os07g0671100	0.441107	-0.934926	Cellular Component: intrinsic component of membrane (GO:0031224);;	--	--	uncharacterized protein LOC4344244 isoform X1 [Oryza sativa Japonica Group]
Os06g0101600	0.500901	-1.30704	Cellular Component: chloroplast thylakoid (GO:0009534);; Biological Process: single-organism metabolic process (GO:0044710);; Molecular Function: transition metal ion binding (GO:0046914);;	K02638|2.32242e-75|osa:4339833|plastocyanin, chloroplastic	Photosynthesis (ko00195)	plastocyanin, chloroplastic [Oryza sativa Japonica Group]
Os08g0434700	0.0186724	-1.46937	Molecular Function: nucleic acid binding (GO:0003676);; Biological Process: transcription, DNA-templated (GO:0006351);; Cellular Component: intracellular membrane-bounded organelle (GO:0043231);;	--	--	Os08g0434700, partial [Oryza sativa Japonica Group]
Os01g0271000	0.0685864	0.84372	Cellular Component: intrinsic component of membrane (GO:0031224);;	--	--	uncharacterized protein LOC4325165 isoform X3 [Oryza sativa Japonica Group]
Os02g0734600	0.247339	-0.801379	Cellular Component: intrinsic component of membrane (GO:0031224);; Cellular Component: intracellular membrane-bounded organelle (GO:0043231);; Molecular Function: metal ion binding (GO:0046872);;	--	--	uncharacterized protein LOC4330644 [Oryza sativa Japonica Group]
Os07g0634300	0.516573	-0.485249	Cellular Component: intracellular membrane-bounded organelle (GO:0043231);;	--	--	uncharacterized protein LOC4344017 [Oryza sativa Japonica Group]
Os01g0725800	0.780592	-0.178341	Biological Process: cellular protein modification process (GO:0006464);; Molecular Function: kinase activity (GO:0016301);; Molecular Function: purine ribonucleoside binding (GO:0032550);;	--	--	Cop1 protein-like [Oryza sativa Japonica Group]
Os02g0774400	0.353388	0.493612	Molecular Function: protein binding (GO:0005515);; Biological Process: cellular process (GO:0009987);; Molecular Function: purine ribonucleoside binding (GO:0032550);; Cellular Component: intracellular membrane-bounded organelle (GO:0043231);;	K04043|0|osa:4330888|heat shock 70 kDa protein, mitochondrial	RNA degradation (ko03018)	heat shock 70 kDa protein, mitochondrial [Oryza sativa Japonica Group]
Os04g0431200	0.728882	-0.1656	Biological Process: translation (GO:0006412);; Biological Process: response to stress (GO:0006950);; Cellular Component: cell projection (GO:0042995);; Cellular Component: intracellular membrane-bounded organelle (GO:0043231);;	K10295|4.50542e-112|osa:4335872|F-box protein 7	--	hypothetical protein OsI_15939 [Oryza sativa Indica Group]
Os05g0213500	0.85151	-0.140881	--	K14496|4.55923e-118|osa:4338104|abscisic acid receptor PYL8	MAPK signaling pathway - plant (ko04016);; Plant hormone signal transduction (ko04075)	abscisic acid receptor PYL5 [Oryza sativa Japonica Group]
Os06g0289300	0.608591	-0.485638	Biological Process: cellular protein modification process (GO:0006464);; Molecular Function: kinase activity (GO:0016301);; Molecular Function: transferase activity, transferring glycosyl groups (GO:0016757);; Molecular Function: purine ribonucleoside binding (GO:0032550);; Cellular Component: intracellular membrane-bounded organelle (GO:0043231);;	--	--	Os06g0289300 [Oryza sativa Japonica Group]
Os02g0700400	0.792834	-0.159071	--	K17893|0|osa:4330432|ubiquinol oxidase 2, mitochondrial	--	ubiquinol oxidase 1c, mitochondrial-like [Oryza sativa Japonica Group]
Os07g0111900	0.000150947	-3.09555	--	--	--	flavin-containing monooxygenase FMO GS-OX-like 8 [Oryza sativa Japonica Group]
Os10g0440500	0.26041	1.21081	--	--	--	hypothetical protein OsJ_31668 [Oryza sativa Japonica Group]
Os01g0934300	0.816276	0.14043	Biological Process: developmental process involved in reproduction (GO:0003006);; Molecular Function: nucleic acid binding (GO:0003676);; Cellular Component: intracellular membrane-bounded organelle (GO:0043231);;	--	--	homeobox protein LUMINIDEPENDENS [Oryza sativa Japonica Group]
Os03g0615300	0.848103	-0.228357	Cellular Component: intracellular membrane-bounded organelle (GO:0043231);;	--	--	uncharacterized protein LOC4333447 [Oryza sativa Japonica Group]
Os05g0550000	0.073014	2.42045	Molecular Function: transition metal ion binding (GO:0046914);;	--	--	hypothetical protein OsI_20878 [Oryza sativa Indica Group]
Os06g0493100	0.0438362	-1.89643	--	--	--	brown planthopper-inducible protein-like [Oryza sativa Japonica Group]
Os06g0136000	0.348294	1.09155	Cellular Component: cell-cell junction (GO:0005911);; Cellular Component: membrane (GO:0016020);; Cellular Component: vacuolar part (GO:0044437);;	--	--	hypersensitive-induced response protein 4 [Oryza sativa Japonica Group]
Os01g0936200	0.412519	0.810865	--	--	--	Os01g0936200 [Oryza sativa Japonica Group]
Os01g0592500	7.86e-08	6.73327	Cellular Component: intrinsic component of membrane (GO:0031224);;	--	--	hypothetical protein OsI_02654 [Oryza sativa Indica Group]
Os03g0165300	0.935055	-0.0815265	Molecular Function: nucleic acid binding (GO:0003676);; Biological Process: transcription, DNA-templated (GO:0006351);; Cellular Component: intracellular membrane-bounded organelle (GO:0043231);;	--	--	Os03g0165300, partial [Oryza sativa Japonica Group]
Os05g0161200	0.483597	-0.470776	--	K00951|0|osa:4337888|probable GTP diphosphokinase CRSH1, chloroplastic	Purine metabolism (ko00230)	probable GTP diphosphokinase CRSH1, chloroplastic [Oryza sativa Japonica Group]
Os04g0301700	0.0553382	1.66985	Molecular Function: UDP-glycosyltransferase activity (GO:0008194);;	--	--	beta-glucuronosyltransferase GlcAT14A [Oryza sativa Japonica Group]
Os05g0129000	0.83507	-0.115308	Biological Process: glutathione metabolic process (GO:0006749);; Cellular Component: plastid stroma (GO:0009532);; Biological Process: response to fungus (GO:0009620);; Biological Process: response to metal ion (GO:0010038);; Molecular Function: acid-amino acid ligase activity (GO:0016881);; Biological Process: glycosinolate biosynthetic process (GO:0019758);; Molecular Function: purine ribonucle…	K01919|0|osa:4337696|glutamate--cysteine ligase A, chloroplastic	Cysteine and methionine metabolism (ko00270);; Glutathione metabolism (ko00480);; Biosynthesis of cofactors (ko01240)	hypothetical protein OsJ_16990 [Oryza sativa Japonica Group]
Os02g0321500	0.948399	0.0430988	--	--	--	motile sperm domain-containing protein 2 [Oryza sativa Japonica Group]
Os09g0110300	0.455243	0.66094	Biological Process: tryptophan catabolic process (GO:0006569);; Molecular Function: hydrolase activity, acting on carbon-nitrogen (but not peptide) bonds, in linear amides (GO:0016811);;	--	--	cyclase-like protein 4 [Oryza sativa Japonica Group]
Os02g0733200	0.968844	-0.0367922	Cellular Component: intrinsic component of membrane (GO:0031224);; Cellular Component: intracellular membrane-bounded organelle (GO:0043231);;	--	--	Os02g0733232, partial [Oryza sativa Japonica Group]
Os08g0360100	0.285228	-0.590506	Biological Process: RNA splicing, via transesterification reactions with bulged adenosine as nucleophile (GO:0000377);; Molecular Function: nucleic acid binding (GO:0003676);; Biological Process: translation (GO:0006412);; Cellular Component: plastid stroma (GO:0009532);;	--	--	RecName: Full=Chloroplastic group IIA intron splicing facilitator CRS1, chloroplastic; AltName: Full=Chloroplastic RNA splicing factor 1; AltName: Full=Protein CHLOROPLAST RNA SPLICING 1; Flags: Precursor
Os02g0774100	0.593813	0.609713	--	--	--	Os02g0774100 [Oryza sativa Japonica Group]
Os10g0440100	0.345155	-0.507822	--	--	--	transcription factor-like protein DPB [Oryza sativa Japonica Group]
Os03g0131400	0.392205	0.667947	Molecular Function: nucleic acid binding (GO:0003676);; Cellular Component: plastid (GO:0009536);; Biological Process: gene expression (GO:0010467);; Molecular Function: transferase activity, transferring phosphorus-containing groups (GO:0016772);;	--	--	uncharacterized protein LOC4331511 [Oryza sativa Japonica Group]
Os06g0647801	0.964223	-0.136564	--	--	--	Os06g0647801, partial [Oryza sativa Japonica Group]
Os06g0297600	0.313786	0.721717	Cellular Component: intrinsic component of membrane (GO:0031224);;	--	--	nucleotide-sugar uncharacterized transporter 2 isoform X1 [Oryza sativa Japonica Group]
Os02g0828100	0.243579	-0.481047	Cellular Component: intracellular membrane-bounded organelle (GO:0043231);;	--	--	Os02g0828100 [Oryza sativa Japonica Group]
Os10g0442800	0.904348	0.229013	Biological Process: cellular protein modification process (GO:0006464);; Biological Process: phosphate-containing compound metabolic process (GO:0006796);; Molecular Function: kinase activity (GO:0016301);; Molecular Function: purine ribonucleoside binding (GO:0032550);; Cellular Component: intracellular membrane-bounded organelle (GO:0043231);;	--	--	serine/threonine-protein kinase PCRK1 isoform X1 [Oryza sativa Japonica Group]
Os03g0249500	0.257456	1.55182	Cellular Component: Golgi apparatus (GO:0005794);; Molecular Function: racemase and epimerase activity (GO:0016854);; Cellular Component: intrinsic component of membrane (GO:0031224);; Biological Process: primary metabolic process (GO:0044238);; Molecular Function: cofactor binding (GO:0048037);;	K08679|0|osa:4332258|UDP-glucuronate 4-epimerase 3	Ascorbate and aldarate metabolism (ko00053);; Amino sugar and nucleotide sugar metabolism (ko00520);; Biosynthesis of cofactors (ko01240)	UDP-glucuronate 4-epimerase 3 [Oryza sativa Japonica Group]
Os09g0514300	0.757352	0.307959	Cellular Component: intracellular membrane-bounded organelle (GO:0043231);;	--	--	Os09g0514300 [Oryza sativa Japonica Group]
Os10g0150200	0.0739449	1.17662	Cellular Component: intracellular membrane-bounded organelle (GO:0043231);;	--	--	uncharacterized protein LOC9272546 [Oryza sativa Japonica Group]
Os01g0590900	0.561132	-0.302362	Biological Process: cellular protein modification process (GO:0006464);; Biological Process: phosphate-containing compound metabolic process (GO:0006796);; Molecular Function: kinase activity (GO:0016301);; Molecular Function: purine ribonucleoside binding (GO:0032550);; Cellular Component: intracellular membrane-bounded organelle (GO:0043231);;	K08287|0|osa:4326374|serine/threonine-protein kinase AFC3	--	serine/threonine-protein kinase AFC3 [Oryza sativa Japonica Group]
Os03g0740700	0.643003	0.309849	--	--	--	Os03g0740700 [Oryza sativa Japonica Group]
Os05g0279400	0.257523	0.786322	Molecular Function: transition metal ion binding (GO:0046914);;	K22381|0|osa:4338285|E3 ubiquitin-protein ligase hel2	--	E3 ubiquitin-protein ligase hel2 [Oryza sativa Japonica Group]
Os02g0624400	0.243155	1.39081	Cellular Component: Golgi apparatus (GO:0005794);; Biological Process: ceramide metabolic process (GO:0006672);; Molecular Function: UDP-glycosyltransferase activity (GO:0008194);; Cellular Component: intrinsic component of membrane (GO:0031224);;	K22809|0|osa:4330028|inositol phosphorylceramide glucuronosyltransferase 1	--	inositol phosphorylceramide glucuronosyltransferase 1 [Oryza sativa Japonica Group]
Os05g0571000	0.65485	-0.282786	Biological Process: cellular protein modification process (GO:0006464);; Molecular Function: kinase activity (GO:0016301);; Molecular Function: purine ribonucleoside binding (GO:0032550);;	K16240|0|osa:4339663|protein SUPPRESSOR OF PHYA-105 1	Circadian rhythm - plant (ko04712)	protein SUPPRESSOR OF PHYA-105 1 [Oryza sativa Japonica Group]
Os04g0433200	0.979828	-0.0188801	Cellular Component: intrinsic component of membrane (GO:0031224);;	--	--	protein EI24 homolog [Oryza sativa Japonica Group]
Os02g0775100	0.229528	-0.817426	--	--	--	Os02g0775100, partial [Oryza sativa Japonica Group]
Os08g0206600	0.160745	0.57162	Biological Process: purine nucleotide metabolic process (GO:0006163);; Cellular Component: plastid envelope (GO:0009526);; Cellular Component: plastid stroma (GO:0009532);; Molecular Function: hydroxymethyl-, formyl- and related transferase activity (GO:0016742);; Molecular Function: cyclohydrolase activity (GO:0019238);;	K00602|0|osa:4344931|bifunctional purine biosynthesis protein PurH isoform X1	Purine metabolism (ko00230);; One carbon pool by folate (ko00670)	uncharacterized protein LOC4344931 isoform X2 [Oryza sativa Japonica Group]
Os09g0515100	0.9542	0.0392458	--	K22531|0|osa:4347572|ATPase family AAA domain-containing protein At1g05910	--	ATPase family AAA domain-containing protein At1g05910 [Oryza sativa Japonica Group]
Os09g0266000	0.582305	-0.435303	Cellular Component: chloroplast thylakoid (GO:0009534);;	--	--	nuclear transport factor 2 (NTF2)-like protein [Oryza sativa Japonica Group]
Os05g0148000	0.899358	0.159945	Cellular Component: intrinsic component of membrane (GO:0031224);;	--	--	Os05g0148000, partial [Oryza sativa Japonica Group]
Os07g0252800	0.0922644	-1.19574	Cellular Component: intrinsic component of membrane (GO:0031224);;	--	--	uncharacterized protein LOC4342851 isoform X1 [Oryza sativa Japonica Group]
Os01g0855000	0.149436	0.629965	--	K13508|0|osa:4324826|glycerol-3-phosphate 2-O-acyltransferase 6	Glycerolipid metabolism (ko00561);; Glycerophospholipid metabolism (ko00564)	glycerol-3-phosphate 2-O-acyltransferase 6 [Oryza sativa Japonica Group]
Os05g0501350	0.0729869	1.29742	Cellular Component: intracellular membrane-bounded organelle (GO:0043231);; Biological Process: single-organism cellular process (GO:0044763);;	--	--	Os05g0501350, partial [Oryza sativa Japonica Group]
Os06g0553100	1.84e-11	4.97804	Molecular Function: nucleic acid binding transcription factor activity (GO:0001071);; Molecular Function: DNA binding (GO:0003677);; Biological Process: transcription, DNA-templated (GO:0006351);; Cellular Component: intracellular membrane-bounded organelle (GO:0043231);;	--	--	Os06g0553100 [Oryza sativa Japonica Group]
Os01g0934800	0.682479	0.6014	--	--	--	esterase PIR7B [Oryza sativa Japonica Group]
Os01g0214600	0.967516	0.081009	Molecular Function: hydrolase activity (GO:0016787);;	--	--	GDSL esterase/lipase At5g45910 isoform X2 [Oryza sativa Japonica Group]
Os11g0132600	0.00448094	1.49033	Molecular Function: hydrolase activity, hydrolyzing O-glycosyl compounds (GO:0004553);; Biological Process: arabinose metabolic process (GO:0019566);;	K01209|0|osa:4349687|alpha-L-arabinofuranosidase 1	Amino sugar and nucleotide sugar metabolism (ko00520)	alpha-L-arabinofuranosidase 1 [Oryza sativa Japonica Group]
Os02g0182500	0.917312	-0.0626578	Cellular Component: proteasome complex (GO:0000502);; Molecular Function: endopeptidase activity (GO:0004175);; Biological Process: modification-dependent protein catabolic process (GO:0019941);; Cellular Component: intracellular membrane-bounded organelle (GO:0043231);;	K02735|1.41428e-148|osa:4328517|proteasome subunit beta type-3-like	Proteasome (ko03050)	proteasome subunit beta type-3-like [Oryza sativa Japonica Group]
Os01g0214901	0.334401	-0.718431	Molecular Function: hydrolase activity (GO:0016787);;	--	--	GDSL esterase/lipase At5g45910 [Oryza sativa Japonica Group]
Os11g0462850	0.982991	-0.0264677	Biological Process: transcription, DNA-templated (GO:0006351);; Cellular Component: intrinsic component of membrane (GO:0031224);; Molecular Function: purine ribonucleoside binding (GO:0032550);;	--	--	Os11g0462900 [Oryza sativa Japonica Group]
Os10g0562500	0.982479	0.0343867	--	--	--	Os10g0562500, partial [Oryza sativa Japonica Group]
Os06g0101000	0.485874	0.280578	Cellular Component: intracellular membrane-bounded organelle (GO:0043231);; Molecular Function: transition metal ion binding (GO:0046914);;	--	--	uncharacterized protein LOC4339828 isoform X2 [Oryza sativa Japonica Group]
Os01g0894100	0.150237	-1.32902	--	--	--	transposon protein, putative, CACTA, En/Spm sub-class [Oryza sativa Japonica Group]
Os03g0249300	0.087349	0.697585	Biological Process: mRNA splicing, via spliceosome (GO:0000398);; Cellular Component: cytoplasm (GO:0005737);; Biological Process: regulation of cell size (GO:0008361);; Biological Process: inorganic anion transport (GO:0015698);; Cellular Component: membrane (GO:0016020);; Cellular Component: methyltransferase complex (GO:0034708);; Cellular Component: protein complex (GO:0043234);;	K05019|5.4895e-152|osa:4332256|chloride conductance regulatory protein ICln	RNA transport (ko03013)	chloride conductance regulatory protein ICln [Oryza sativa Japonica Group]
Os10g0124400	0.538179	-0.845568	Molecular Function: purine ribonucleoside binding (GO:0032550);;	--	--	Os10g0124400 [Oryza sativa Japonica Group]
Os04g0227500	0.077495	-1.42693	--	--	--	uncharacterized protein LOC4335218 [Oryza sativa Japonica Group]
Os02g0775300	0.0858221	2.2508	Cellular Component: intrinsic component of membrane (GO:0031224);;	--	--	uncharacterized protein LOC4330896 [Oryza sativa Japonica Group]
Os04g0431300	0.811536	-0.171034	Cellular Component: intracellular membrane-bounded organelle (GO:0043231);;	--	--	Os04g0431300, partial [Oryza sativa Japonica Group]
Os04g0542900	0.512038	0.725023	Molecular Function: hydrolase activity (GO:0016787);; Cellular Component: intracellular membrane-bounded organelle (GO:0043231);;	K14648|0|osa:4336547|poly(U)-specific endoribonuclease-B	--	poly(U)-specific endoribonuclease-B [Oryza sativa Japonica Group]
Os08g0510500	0.458479	-0.391394	--	--	--	protein EMSY-LIKE 3 [Oryza sativa Japonica Group]
Os02g0180000	0.761374	0.179875	--	K17499|0|osa:4328505|probable protein phosphatase 2C 11	--	probable protein phosphatase 2C 11 isoform X1 [Oryza sativa Japonica Group]
Os11g0684100	0.99059	-0.0198379	Molecular Function: nucleic acid binding transcription factor activity (GO:0001071);; Molecular Function: DNA binding (GO:0003677);; Molecular Function: endopeptidase activity (GO:0004175);; Biological Process: DNA metabolic process (GO:0006259);; Biological Process: transcription, DNA-templated (GO:0006351);; Biological Process: protein metabolic process (GO:0019538);; Molecular Function: purine…	--	--	disease resistance protein RGA5-like [Oryza sativa Japonica Group]
Os05g0355200	0.175599	-1.14867	--	--	--	pentatricopeptide repeat-containing protein At3g62470, mitochondrial [Oryza sativa Japonica Group]
Os05g0420600	0.0493115	2.11289	--	--	--	PREDICTED: cytochrome c [Oryza brachyantha]
Os05g0269100	0.381393	0.426716	--	--	--	uncharacterized protein LOC4338253 [Oryza sativa Japonica Group]
Os05g0587300	0.409288	-1.43444	Biological Process: cellular homeostasis (GO:0019725);;	--	--	unknow protein, contains tetratricopeptide (TPR) domain [Oryza sativa Japonica Group]
Os08g0509400	0.200856	-1.41348	--	K01188|0|osa:4345996|beta-glucosidase 28 isoform X2	Cyanoamino acid metabolism (ko00460);; Starch and sucrose metabolism (ko00500);; Phenylpropanoid biosynthesis (ko00940)	beta-glucosidase 28 isoform X1 [Oryza sativa Japonica Group]
Os05g0421600	0.220468	1.02339	Molecular Function: nucleic acid binding (GO:0003676);; Biological Process: transcription, DNA-templated (GO:0006351);; Cellular Component: intracellular membrane-bounded organelle (GO:0043231);;	--	--	Os05g0421600 [Oryza sativa Japonica Group]
Os07g0634600	0.904854	-0.130539	Molecular Function: catalytic activity (GO:0003824);;	--	--	pectin acetylesterase 12 [Oryza sativa Japonica Group]
Os12g0405100	0.191657	-0.570685	Molecular Function: nucleic acid binding (GO:0003676);; Molecular Function: cation binding (GO:0043169);;	--	--	zinc finger CCCH domain-containing protein 66 isoform X1 [Oryza sativa Japonica Group]
Os06g0116300	0.720978	0.152663	--	K08489|0|osa:4339929|syntaxin-43	SNARE interactions in vesicular transport (ko04130)	syntaxin-43 [Oryza sativa Japonica Group]
Os06g0552900	0.69951	0.792956	--	K16223|1.34868e-114|osa:4341272|protein FLOWERING LOCUS T isoform X1	Circadian rhythm - plant (ko04712)	protein FLOWERING LOCUS T isoform X1 [Oryza sativa Japonica Group]
Os01g0358300	0.58325	-0.493013	Cellular Component: intrinsic component of membrane (GO:0031224);;	--	--	protein LOW PSII ACCUMULATION 1, chloroplastic [Oryza sativa Japonica Group]
Os02g0689200	0.871622	0.148132	Cellular Component: intrinsic component of membrane (GO:0031224);; Biological Process: establishment of localization (GO:0051234);;	--	--	probable purine permease 11 isoform X2 [Oryza sativa Japonica Group]
Os07g0161000	0.502857	0.515244	--	--	--	outer envelope protein 61 [Oryza sativa Japonica Group]
Os08g0335000	0.966059	0.0241372	--	K12813|0|osa:4345304|pre-mRNA-splicing factor ATP-dependent RNA helicase DEAH1	Spliceosome (ko03040)	pre-mRNA-splicing factor ATP-dependent RNA helicase DEAH1 [Oryza sativa Japonica Group]
Os12g0106500	0.300667	-0.787223	--	--	--	Nodulin-like family protein, expressed [Oryza sativa Japonica Group]
Os01g0897500	0.519259	-0.574569	Cellular Component: intracellular membrane-bounded organelle (GO:0043231);;	--	--	Os01g0897500, partial [Oryza sativa Japonica Group]
Os02g0688500	0.779882	-0.164897	--	K03849|0|osa:4330363|probable dolichyl pyrophosphate Glc1Man9GlcNAc2 alpha-1,3-glucosyltransferase	N-Glycan biosynthesis (ko00510)	probable dolichyl pyrophosphate Glc1Man9GlcNAc2 alpha-1,3-glucosyltransferase [Oryza sativa Japonica Group]
Os04g0432400	0.108489	-1.14165	Molecular Function: hydrolase activity, hydrolyzing O-glycosyl compounds (GO:0004553);;	--	--	cytosolic invertase 1-like [Oryza sativa Japonica Group]
Os07g0210100	0.33035	-0.990807	Biological Process: vesicle-mediated transport (GO:0016192);; Cellular Component: intracellular membrane-bounded organelle (GO:0043231);; Cellular Component: protein complex (GO:0043234);;	--	--	hypothetical protein OsI_25349 [Oryza sativa Indica Group]
Os08g0290700	0.00500255	4.63551	--	--	--	flavonoid O-methyltransferase-like protein Os11g0303600 [Oryza sativa Japonica Group]
Os01g0817700	0.961938	0.0465329	Biological Process: glucose metabolic process (GO:0006006);; Biological Process: pyruvate metabolic process (GO:0006090);; Molecular Function: intramolecular transferase activity, phosphotransferases (GO:0016868);; Cellular Component: intracellular part (GO:0044424);; Molecular Function: transition metal ion binding (GO:0046914);;	K15633|0|osa:4327493|2,3-bisphosphoglycerate-independent phosphoglycerate mutase	Glycolysis / Gluconeogenesis (ko00010);; Glycine, serine and threonine metabolism (ko00260);; Carbon metabolism (ko01200);; Biosynthesis of amino acids (ko01230)	2,3-bisphosphoglycerate-independent phosphoglycerate mutase [Oryza sativa Japonica Group]
Os06g0701700	0.563966	0.915972	--	--	--	cation transporter HKT1 [Oryza sativa Japonica Group]
Os07g0669600	0.684749	0.222982	--	--	--	nucleolar protein 58 isoform X1 [Oryza sativa Japonica Group]
Os05g0270800	0.870219	0.199793	Biological Process: IMP biosynthetic process (GO:0006188);; Cellular Component: plastid (GO:0009536);; Molecular Function: hydroxymethyl-, formyl- and related transferase activity (GO:0016742);;	--	--	Os05g0270800 [Oryza sativa Japonica Group]
Os04g0541500	0.970701	0.0283282	Biological Process: phosphate-containing compound metabolic process (GO:0006796);; Molecular Function: transferase activity, transferring phosphorus-containing groups (GO:0016772);; Cellular Component: intracellular membrane-bounded organelle (GO:0043231);;	--	--	sphingoid long-chain bases kinase 1 [Oryza sativa Japonica Group]
Os01g0560000	0.299443	0.809567	Molecular Function: catalytic activity (GO:0003824);; Cellular Component: endoplasmic reticulum (GO:0005783);;	K21604|0|osa:4324686|IAA-amino acid hydrolase ILR1-like 1	--	IAA-amino acid hydrolase ILR1-like 1 [Oryza sativa Japonica Group]
Os07g0632700	0.806055	0.182815	Cellular Component: intrinsic component of membrane (GO:0031224);; Cellular Component: intracellular membrane-bounded organelle (GO:0043231);; Biological Process: establishment of localization (GO:0051234);;	K20352|6.34154e-121|osa:4344005|transmembrane emp24 domain-containing protein p24delta9	--	transmembrane emp24 domain-containing protein p24delta9 [Oryza sativa Japonica Group]
Os06g0116100	0.988769	-0.0143299	Molecular Function: protein kinase activity (GO:0004672);; Biological Process: cellular protein modification process (GO:0006464);; Molecular Function: purine ribonucleoside binding (GO:0032550);;	K08829|0|osa:4339927|cyclin-dependent kinase F-4-like	--	cyclin-dependent kinase F-4-like [Oryza sativa Japonica Group]
Os06g0116400	0.858295	0.217578	Cellular Component: intrinsic component of membrane (GO:0031224);;	--	--	uncharacterized protein LOC4339930 [Oryza sativa Japonica Group]
Os01g0728300	0.792056	0.263168	--	--	--	cytochrome P450 72A14 [Oryza sativa Japonica Group]
Os05g0419200	0.230586	-0.643016	--	--	--	protein root UVB sensitive 6 [Oryza sativa Japonica Group]
Os03g0111500	0.743767	-0.189185	Cellular Component: intracellular membrane-bounded organelle (GO:0043231);;	--	--	expressed protein [Oryza sativa Japonica Group]
Os01g0935900	0.522564	0.473519	--	--	--	succinate dehydrogenase subunit 4, mitochondrial [Oryza sativa Japonica Group]
Os01g0725600	0.293165	0.85175	--	--	--	ultraviolet-B receptor UVR8 [Oryza sativa Japonica Group]
Os01g0817650	0.00806035	3.49349	--	--	--	protein LURP-one-related 8 [Oryza sativa Japonica Group]
Os01g0602500	0.493735	0.424884	--	--	--	cytochrome P450 (CYP72C)-like [Oryza sativa Japonica Group]
Os02g0724000	0.00734744	3.94899	Molecular Function: nucleic acid binding (GO:0003676);; Cellular Component: cell part (GO:0044464);; Molecular Function: transition metal ion binding (GO:0046914);;	--	--	hypothetical protein OsJ_08199 [Oryza sativa Japonica Group]
Os01g0823500	0.0679043	-1.84451	Molecular Function: nucleic acid binding (GO:0003676);;	--	--	transcription repressor OFP2 [Oryza sativa Japonica Group]
Os06g0297400	0.842194	-0.323725	Cellular Component: intrinsic component of membrane (GO:0031224);;	--	--	uncharacterized protein LOC9269758 isoform X1 [Oryza sativa Japonica Group]
Os02g0731700	0.0216557	1.72614	Cellular Component: cell part (GO:0044464);; Molecular Function: transition metal ion binding (GO:0046914);;	--	--	zinc finger protein CONSTANS-LIKE 16 [Oryza sativa Japonica Group]
Os02g0690200	0.436789	0.744097	--	--	--	uncharacterized protein LOC4330375 [Oryza sativa Japonica Group]
Os01g0501700	0.853265	-0.132849	--	K03118|0|osa:4324478|sec-independent protein translocase protein TATC, chloroplastic	Protein export (ko03060)	sec-independent protein translocase protein TATC, chloroplastic [Oryza sativa Japonica Group]
Os07g0112100	0.00169367	-2.42889	--	--	--	flavin-containing monooxygenase FMO GS-OX-like 9 [Oryza sativa Japonica Group]
Os04g0432500	0.649213	0.278024	--	K09580|0|osa:4335881|protein disulfide isomerase-like 5-2	Protein processing in endoplasmic reticulum (ko04141)	protein disulfide isomerase-like 5-2 [Oryza sativa Japonica Group]
Os06g0239200	0.694217	0.568469	--	--	--	uncharacterized protein LOC4340617 [Oryza sativa Japonica Group]
Os01g0935400	0.00636867	-1.40426	--	--	--	protein SRG1 [Oryza sativa Japonica Group]
Os03g0247600	0.90116	0.1427	Cellular Component: intrinsic component of membrane (GO:0031224);;	--	--	expressed protein [Oryza sativa Japonica Group]
Os04g0430600	0.905717	0.140245	Cellular Component: intrinsic component of membrane (GO:0031224);; Cellular Component: intracellular membrane-bounded organelle (GO:0043231);;	--	--	hypothetical protein OsI_15933 [Oryza sativa Indica Group]
Os05g0500450	0.0685013	0.890894	Cellular Component: plastid envelope (GO:0009526);;	--	--	uncharacterized protein LOC9272665 [Oryza sativa Japonica Group]
Os03g0769400	0.360319	0.885811	--	--	--	BTB/POZ domain-containing protein At3g50780 [Oryza sativa Japonica Group]
Os06g0326000	0.9542	0.0679366	--	--	--	AT-hook motif nuclear-localized protein 10 [Oryza sativa Japonica Group]
Os02g0175100	0.655043	-0.361677	Molecular Function: nucleic acid binding transcription factor activity (GO:0001071);; Molecular Function: DNA binding (GO:0003677);; Biological Process: transcription, DNA-templated (GO:0006351);;	--	--	Os02g0175100, partial [Oryza sativa Japonica Group]
Os10g0561800	0.815026	-0.224367	--	K09338|6.70764e-112|osa:4349388|homeobox-leucine zipper protein HOX1	--	RecName: Full=Homeobox-leucine zipper protein HOX1; AltName: Full=HD-ZIP protein HOX1; AltName: Full=Homeodomain transcription factor HOX1; AltName: Full=OsHox1
Os06g0116500	0.988888	0.0095447	Molecular Function: binding (GO:0005488);; Cellular Component: intracellular membrane-bounded organelle (GO:0043231);;	--	--	protein ENHANCED DISEASE RESISTANCE 2 isoform X1 [Setaria italica]
Os03g0135600	0.893773	0.0631438	Cellular Component: plastid (GO:0009536);;	--	--	ankyrin repeat domain-containing protein, chloroplastic [Oryza sativa Japonica Group]
Os07g0655900	0.0816306	1.64405	Cellular Component: intrinsic component of membrane (GO:0031224);;	--	--	hypothetical protein EE612_041106 [Oryza sativa]
Os01g0729950	0.427623	0.805355	--	--	--	hypothetical protein OsI_03611 [Oryza sativa Indica Group]
Os01g0855600	0.68503	0.899075	Biological Process: response to stress (GO:0006950);;	--	--	nematode resistance protein-like HSPRO1 [Oryza sativa Japonica Group]
Os03g0327800	0.0557846	2.71375	Molecular Function: nucleic acid binding (GO:0003676);; Biological Process: transcription, DNA-templated (GO:0006351);; Cellular Component: intracellular membrane-bounded organelle (GO:0043231);;	--	--	NAC transcription factor 47 [Oryza sativa Japonica Group]
Os02g0775200	0.770749	-0.159465	--	K10756|0|osa:4330895|replication factor C subunit 3	DNA replication (ko03030);; Nucleotide excision repair (ko03420);; Mismatch repair (ko03430)	replication factor C subunit 3 [Oryza sativa Japonica Group]
Os01g0727400	0.996521	-0.00581317	Cellular Component: intracellular membrane-bounded organelle (GO:0043231);;	K18159|1.64804e-154|osa:4324734|probable complex I intermediate-associated protein 30	--	hypothetical protein OsJ_03324 [Oryza sativa Japonica Group]
Os03g0767800	0.00798191	2.84804	Cellular Component: intrinsic component of membrane (GO:0031224);;	--	--	cold-regulated 413 plasma membrane protein 2 [Oryza sativa Japonica Group]
Os12g0226400	0.0669493	-1.70308	Molecular Function: oxidoreductase activity, acting on the CH-CH group of donors, NAD or NADP as acceptor (GO:0016628);; Biological Process: single-organism metabolic process (GO:0044710);; Molecular Function: transition metal ion binding (GO:0046914);;	--	--	Os12g0226400, partial [Oryza sativa Japonica Group]
Os01g0329800	0.197297	1.13769	Molecular Function: nucleic acid binding (GO:0003676);;	--	--	uncharacterized protein LOC4326985 [Oryza sativa Japonica Group]
Os05g0160100	0.623044	0.248178	Cellular Component: cytoplasm (GO:0005737);; Cellular Component: intracellular membrane-bounded organelle (GO:0043231);;	K18624|0|osa:4337882|macrophage erythroblast attacher	--	protein MAEA homolog [Oryza sativa Japonica Group]
Os01g0601000	0.00118129	1.75568	--	--	--	Os01g0601000 [Oryza sativa Japonica Group]
Os06g0288400	0.310435	-0.730833	Cellular Component: intrinsic component of membrane (GO:0031224);;	--	--	Os06g0288400 [Oryza sativa Japonica Group]
Os11g0446000	0.33187	-0.97986	--	--	--	Os11g0446000 [Oryza sativa Japonica Group]
Os07g0102100	0.1279	-1.52622	--	K03549|0|osa:4342173|potassium transporter 22	--	putative high-affinity potassium transporter [Oryza sativa Japonica Group]
Os12g0106000	0.477676	0.656769	--	K00522|4.69374e-132|osa:4351264|ferritin-1, chloroplastic	--	ferritin-1, chloroplastic [Oryza sativa Japonica Group]
Os11g0106400	0.470683	0.59264	--	K03178|0|osa:4349557|ubiquitin-activating enzyme E1 2	Ubiquitin mediated proteolysis (ko04120)	ubiquitin-activating enzyme E1 2 [Oryza sativa Japonica Group]
Os09g0108600	0.962599	-0.0439519	Molecular Function: catalytic activity (GO:0003824);; Molecular Function: binding (GO:0005488);; Cellular Component: extracellular region (GO:0005576);; Cellular Component: cytoplasm (GO:0005737);; Biological Process: monosaccharide metabolic process (GO:0005996);; Cellular Component: intrinsic component of membrane (GO:0031224);; Cellular Component: intracellular membrane-bounded organelle (GO:0…	K01785|0|osa:4346383|aldose 1-epimerase	Glycolysis / Gluconeogenesis (ko00010);; Galactose metabolism (ko00052)	Os09g0108600, partial [Oryza sativa Japonica Group]
Os02g0321800	0.314578	0.630327	--	K14009|5.34721e-122|osa:4329170|B-cell receptor-associated protein 31	Protein processing in endoplasmic reticulum (ko04141)	B-cell receptor-associated protein 31 [Oryza sativa Japonica Group]
Os02g0232400	0.34457	0.86117	Biological Process: citrate metabolic process (GO:0006101);; Molecular Function: transferase activity, transferring acyl groups (GO:0016746);; Cellular Component: intracellular membrane-bounded organelle (GO:0043231);;	K01647|0|osa:4328812|citrate synthase 3, peroxisomal	Citrate cycle (TCA cycle) (ko00020);; Glyoxylate and dicarboxylate metabolism (ko00630);; Carbon metabolism (ko01200);; 2-Oxocarboxylic acid metabolism (ko01210);; Biosynthesis of amino acids (ko01230)	Os02g0232400, partial [Oryza sativa Japonica Group]
Os03g0766600	0.560021	-0.648218	--	--	--	unnamed protein product [Oryza sativa Japonica Group]
Os05g0549700	0.556383	0.530726	--	K01733|0|osa:4339521|threonine synthase, chloroplastic	Glycine, serine and threonine metabolism (ko00260);; Vitamin B6 metabolism (ko00750);; Biosynthesis of amino acids (ko01230)	hypothetical protein EE612_031005 [Oryza sativa]
Os04g0599650	0.843187	0.223429	--	--	--	Os04g0599650 [Oryza sativa Japonica Group]
Os09g0116400	0.952366	0.0448384	--	K14832|0|osa:4346414|CCAAT/enhancer-binding protein zeta	--	CCAAT/enhancer-binding protein zeta [Oryza sativa Japonica Group]
Os07g0631900	0.864655	-0.147507	Cellular Component: viral capsid (GO:0019028);; Molecular Function: small molecule binding (GO:0036094);; Cellular Component: intracellular membrane-bounded organelle (GO:0043231);; Molecular Function: organic cyclic compound binding (GO:0097159);;	K11294|4.44531e-128|osa:4344001|29 kDa ribonucleoprotein A, chloroplastic	--	chloroplast 29 kDa ribonucleoprotein, partial [Oryza sativa Indica Group]
Os12g0450500	0.461046	0.803224	Cellular Component: intracellular membrane-bounded organelle (GO:0043231);;	--	--	expressed protein [Oryza sativa Japonica Group]
Os10g0390701	0.314477	0.835258	--	--	--	hypothetical protein OsJ_31387 [Oryza sativa Japonica Group]
Os01g0357900	0.545822	-0.651293	--	--	--	hypothetical protein OsJ_01733 [Oryza sativa Japonica Group]
Os03g0112600	0.702854	0.497049	Molecular Function: nucleic acid binding (GO:0003676);; Molecular Function: motor activity (GO:0003774);; Biological Process: microtubule-based process (GO:0007017);; Molecular Function: tubulin binding (GO:0015631);; Cellular Component: intrinsic component of membrane (GO:0031224);; Molecular Function: purine ribonucleoside binding (GO:0032550);; Molecular Function: transition metal ion binding …	--	--	Os03g0112600 [Oryza sativa Japonica Group]
Os05g0421300	0.971441	0.0339749	Cellular Component: membrane (GO:0016020);;	--	--	uncharacterized protein LOC4338831 [Oryza sativa Japonica Group]
Os01g0729200	0.863918	0.248397	Cellular Component: plastid inner membrane (GO:0009528);; Cellular Component: intrinsic component of membrane (GO:0031224);;	--	--	hypothetical protein OsI_03607 [Oryza sativa Indica Group]
Os12g0207200	0.720537	0.245556	Cellular Component: intracellular membrane-bounded organelle (GO:0043231);;	--	--	Os12g0207200, partial [Oryza sativa Japonica Group]
Os03g0112800	0.156696	0.773448	Molecular Function: protein kinase activity (GO:0004672);; Biological Process: cellular protein modification process (GO:0006464);; Biological Process: phosphate-containing compound metabolic process (GO:0006796);; Cellular Component: intrinsic component of membrane (GO:0031224);; Molecular Function: purine ribonucleoside binding (GO:0032550);; Cellular Component: intracellular membrane-bounded o…	--	--	transmembrane and coiled-coil domain-containing protein 4 [Oryza sativa Japonica Group]
Os11g0103100	0.97185	-0.0252696	Biological Process: cellular protein modification process (GO:0006464);; Molecular Function: kinase activity (GO:0016301);; Molecular Function: purine ribonucleoside binding (GO:0032550);;	--	--	uncharacterized protein LOC4349538 isoform X1 [Oryza sativa Japonica Group]
Os01g0933900	0.565428	0.814118	--	K00799|2.38707e-150|osa:4326828|glutathione S-transferase 3	Glutathione metabolism (ko00480)	glutathione S-transferase 3 [Oryza sativa Japonica Group]
Os09g0386500	0.765719	-0.193479	--	--	--	chromatin remodeling protein EBS isoform X2 [Oryza sativa Japonica Group]
Os01g0328700	0.791495	-0.278311	--	K00382|0|osa:4326980|dihydrolipoyl dehydrogenase 1, mitochondrial	Glycolysis / Gluconeogenesis (ko00010);; Citrate cycle (TCA cycle) (ko00020);; Glycine, serine and threonine metabolism (ko00260);; Valine, leucine and isoleucine degradation (ko00280);; Lysine degradation (ko00310);; Tryptophan metabolism (ko00380);; Pyruvate metabolism (ko00620);; Glyoxylate and dicarboxylate metabolism (ko00630);; Propanoate metabolism (ko00640);; Carbon metabolism (ko01200);;…	dihydrolipoyl dehydrogenase 1, mitochondrial [Oryza sativa Japonica Group]
Os02g0773200	2.47e-05	5.08826	--	--	--	universal stress protein PHOS32 [Oryza sativa Japonica Group]
Os03g0110300	0.707642	0.302772	Cellular Component: intrinsic component of membrane (GO:0031224);;	--	--	uncharacterized protein LOC4331352 [Oryza sativa Japonica Group]
Os02g0110700	0.551089	0.456951	Molecular Function: purine ribonucleoside binding (GO:0032550);; Molecular Function: transition metal ion binding (GO:0046914);;	--	--	hypothetical protein OsJ_05065 [Oryza sativa Japonica Group]
Os01g0500500	0.997896	0.00264177	--	--	--	nitrate regulatory gene2 protein [Oryza sativa Japonica Group]
Os01g0823100	0.0174025	-4.44532	Cellular Component: external encapsulating structure (GO:0030312);; Biological Process: cell wall organization (GO:0071555);;	--	--	expansin-A2 [Oryza sativa Japonica Group]
Os10g0442100	0.00120516	1.71308	Biological Process: RNA methylation (GO:0001510);; Biological Process: pyruvate metabolic process (GO:0006090);; Biological Process: phosphate-containing compound metabolic process (GO:0006796);; Biological Process: tRNA processing (GO:0008033);; Molecular Function: kinase activity (GO:0016301);; Molecular Function: tRNA (guanine) methyltransferase activity (GO:0016423);; Molecular Function: tran…	K00927|0|osa:4348728|phosphoglycerate kinase isoform X1	Glycolysis / Gluconeogenesis (ko00010);; Carbon fixation in photosynthetic organisms (ko00710);; Carbon metabolism (ko01200);; Biosynthesis of amino acids (ko01230)	uncharacterized protein LOC4348728 isoform X1 [Oryza sativa Japonica Group]
Os06g0647100	0.632245	-0.463736	--	K02916|1.0232e-68|osa:4341664|50S ribosomal protein L35, chloroplastic	Ribosome (ko03010)	50S ribosomal protein L35, chloroplastic [Oryza sativa Japonica Group]
Os03g0769100	0.795218	0.35539	--	K02996|4.68622e-106|osa:4334247|30S ribosomal protein S9, chloroplastic	Ribosome (ko03010)	30S ribosomal protein S9, chloroplastic [Oryza sativa Japonica Group]
Os08g0507701	0.893495	-0.188381	--	--	--	cytochrome P450 76M5-like [Oryza sativa Japonica Group]
Os05g0148300	0.149835	0.90299	--	K17411|1.76215e-59|osa:4337808|uncharacterized protein LOC4337808	--	unknown protein [Oryza sativa Japonica Group]
Os07g0673200	0.0841608	2.36989	--	K16275|0|osa:4344254|probable E3 ubiquitin-protein ligase BAH1-like 2	--	hypothetical protein OsJ_25542 [Oryza sativa Japonica Group]
Os09g0514900	0.744585	0.204937	--	--	--	transcription factor 25 [Oryza sativa Japonica Group]
Os10g0467200	0.242789	-0.626059	--	K13345|0|osa:4348849|peroxisome biogenesis protein 12	Peroxisome (ko04146)	peroxisome biogenesis protein 12 [Oryza sativa Japonica Group]
Os01g0356500	0.775408	-0.223134	Cellular Component: cytoplasm (GO:0005737);; Biological Process: phosphate-containing compound metabolic process (GO:0006796);; Biological Process: coenzyme biosynthetic process (GO:0009108);; Molecular Function: diphosphotransferase activity (GO:0016778);; Molecular Function: vitamin binding (GO:0019842);; Molecular Function: purine ribonucleoside binding (GO:0032550);; Biological Process: thiam…	K00949|0|osa:4326288|thiamine pyrophosphokinase 2 isoform X1	Thiamine metabolism (ko00730);; Biosynthesis of cofactors (ko01240)	thiamine pyrophosphokinase 2 isoform X1 [Oryza sativa Japonica Group]
Os06g0685700	0.97382	-0.0279907	--	--	--	auxin response factor 18 [Oryza sativa Japonica Group]
Os11g0447300	0.0822537	1.02638	--	K19828|0|osa:4350437|short integuments 2, mitochondrial	--	hypothetical protein OsI_02108 [Oryza sativa Indica Group]
Os05g0128200	0.924269	-0.0496474	Molecular Function: nucleic acid binding (GO:0003676);; Molecular Function: cation binding (GO:0043169);;	--	--	zinc finger CCCH domain-containing protein 33 [Oryza sativa Japonica Group]
Os12g0105300	0.429948	-0.75117	--	--	--	protein CHUP1, chloroplastic isoform X1 [Oryza sativa Japonica Group]
Os01g0212100	0.91477	-0.108055	--	K13117|0|osa:4325567|probable pre-mRNA-splicing factor ATP-dependent RNA helicase DEAH9	--	probable pre-mRNA-splicing factor ATP-dependent RNA helicase DEAH9 [Oryza sativa Japonica Group]
Os05g0420200	0.607514	-0.417762	Cellular Component: intracellular membrane-bounded organelle (GO:0043231);;	--	--	uncharacterized protein LOC4338823 [Oryza sativa Japonica Group]
Os04g0498800	0.25316	0.858864	Molecular Function: purine ribonucleoside binding (GO:0032550);;	--	--	cell division control protein 48 homolog B [Oryza sativa Japonica Group]
Os02g0110200	0.750725	-0.349817	--	K10528|0|osa:4328040|probable inactive linolenate hydroperoxide lyase	alpha-Linolenic acid metabolism (ko00592)	probable inactive linolenate hydroperoxide lyase [Oryza sativa Japonica Group]
Os06g0701300	0.736168	-0.225631	--	K08869|0|osa:4341968|uncharacterized protein LOC4341968	--	ABC transporter-like [Oryza sativa Japonica Group]
Os06g0133400	0.000520284	5.92925	--	--	--	Os06g0133400, partial [Oryza sativa Japonica Group]
Os10g0561900	0.531321	-0.372587	--	--	--	putative dual specificity protein phosphatase DSP8 [Oryza sativa Japonica Group]
Os06g0334300	0.281057	-0.856898	Molecular Function: protein kinase activity (GO:0004672);; Biological Process: cellular protein modification process (GO:0006464);; Biological Process: phosphate-containing compound metabolic process (GO:0006796);; Cellular Component: intrinsic component of membrane (GO:0031224);; Molecular Function: purine ribonucleoside binding (GO:0032550);; Cellular Component: intracellular membrane-bounded o…	--	--	receptor-like protein kinase HERK 1 isoform X1 [Oryza sativa Japonica Group]
Os06g0223800	0.187314	-0.937207	Cellular Component: intracellular part (GO:0044424);;	--	--	protein CELLULOSE SYNTHASE INTERACTIVE 1 [Oryza sativa Japonica Group]
Os04g0271200	0.719983	-0.214983	Molecular Function: catalytic activity (GO:0003824);; Biological Process: fatty acid metabolic process (GO:0006631);; Cellular Component: intrinsic component of membrane (GO:0031224);; Cellular Component: intracellular membrane-bounded organelle (GO:0043231);; Biological Process: single-multicellular organism process (GO:0044707);;	K10703|1.1215e-149|osa:4335343|very-long-chain (3R)-3-hydroxyacyl-CoA dehydratase PASTICCINO 2A	Fatty acid elongation (ko00062);; Biosynthesis of unsaturated fatty acids (ko01040);; Fatty acid metabolism (ko01212)	very-long-chain (3R)-3-hydroxyacyl-CoA dehydratase PASTICCINO 2A [Oryza sativa Japonica Group]
Os02g0321900	0.00171186	1.47175	--	K02865|3.66562e-140|osa:4329171|60S ribosomal protein L10a	Ribosome (ko03010)	60S ribosomal protein L10a [Oryza sativa Japonica Group]
Os07g0100200	0.00152207	-1.31046	--	K06215|0|osa:4342162|probable pyridoxal 5'-phosphate synthase subunit PDX1.1	Vitamin B6 metabolism (ko00750);; Biosynthesis of cofactors (ko01240)	probable pyridoxal 5&apos;-phosphate synthase subunit PDX1.1 [Oryza sativa Japonica Group]
Os01g0897200	0.956486	-0.03229	Molecular Function: nucleic acid binding (GO:0003676);; Molecular Function: endoribonuclease activity, producing 3'-phosphomonoesters (GO:0016892);; Biological Process: RNA phosphodiester bond hydrolysis (GO:0090501);;	--	--	putative S-like RNase [Oryza sativa Japonica Group]
Os08g0434150	0.0339669	1.93685	Molecular Function: nucleic acid binding (GO:0003676);; Molecular Function: endoribonuclease activity, producing 3'-phosphomonoesters (GO:0016892);; Biological Process: RNA phosphodiester bond hydrolysis (GO:0090501);;	K01166|2.14932e-112|osa:4345656|extracellular ribonuclease LE	--	extracellular ribonuclease LE [Oryza sativa Japonica Group]
Os05g0146900	0.0747311	0.707347	Cellular Component: intrinsic component of membrane (GO:0031224);;	--	--	Os05g0146900 [Oryza sativa Japonica Group]
Os04g0563801	0.0873786	-0.952722	Biological Process: lipid localization (GO:0010876);; Molecular Function: substrate-specific transporter activity (GO:0022892);; Cellular Component: intrinsic component of membrane (GO:0031224);; Cellular Component: intracellular membrane-bounded organelle (GO:0043231);;	--	--	Os04g0563801 [Oryza sativa Japonica Group]
Os04g0561550	0.407812	0.603355	--	--	--	Os04g0561550, partial [Oryza sativa Japonica Group]
Os02g0723300	0.987279	-0.0179738	--	K03012|6.25969e-138|osa:4330570|DNA-directed RNA polymerase II subunit 4 isoform X1	RNA polymerase (ko03020)	DNA-directed RNA polymerase II subunit 4 isoform X1 [Oryza sativa Japonica Group]
Os09g0514100	0.332746	-0.364438	Molecular Function: catalytic activity (GO:0003824);; Cellular Component: intracellular membrane-bounded organelle (GO:0043231);; Biological Process: single-organism metabolic process (GO:0044710);;	--	--	uncharacterized protein LOC4347563 isoform X2 [Oryza sativa Japonica Group]
Os08g0305300	0.610396	0.611122	Biological Process: meiotic spindle organization (GO:0000212);; Biological Process: nuclear division (GO:0000280);; Biological Process: nuclear-transcribed mRNA catabolic process (GO:0000956);; Cellular Component: cytoplasmic ribonucleoprotein granule (GO:0036464);; Cellular Component: intracellular membrane-bounded organelle (GO:0043231);;	K14409|0|osa:4345227|protein SMG7 isoform X1	mRNA surveillance pathway (ko03015)	protein SMG7 isoform X1 [Oryza sativa Japonica Group]
Os01g0328900	0.953372	-0.0438959	--	K20843|0|osa:4326981|probable beta-1,3-galactosyltransferase 16	--	hydroxyproline O-galactosyltransferase GALT3 [Oryza sativa Japonica Group]
Os01g0856800	0.673995	-0.277999	--	--	--	pleckstrin homology domain-containing protein 1 [Oryza sativa Japonica Group]
Os04g0542800	0.000199859	-1.57286	Biological Process: transport (GO:0006810);; Cellular Component: intrinsic component of membrane (GO:0031224);; Cellular Component: intracellular membrane-bounded organelle (GO:0043231);;	--	--	hypothetical protein OsI_16833 [Oryza sativa Indica Group]
Os01g0589300	0.612439	0.421534	--	K09422|1.10983e-167|osa:4324449|single myb histone 2	--	hypothetical protein OsI_02637 [Oryza sativa Indica Group]
Os03g0133650	0.0853138	1.83929	Molecular Function: catalytic activity (GO:0003824);;	--	--	probable acyl-activating enzyme 1, peroxisomal isoform X2 [Oryza sativa Japonica Group]
Os10g0389402	0.411044	-0.613371	--	--	--	Os10g0389300, partial [Oryza sativa Japonica Group]
Os02g0774300	0.0660576	0.756894	Molecular Function: protein binding (GO:0005515);; Biological Process: cellular process (GO:0009987);; Molecular Function: purine ribonucleoside binding (GO:0032550);; Cellular Component: intracellular membrane-bounded organelle (GO:0043231);;	K04043|0|osa:4330888|heat shock 70 kDa protein, mitochondrial	RNA degradation (ko03018)	heat shock 70 kDa protein, mitochondrial [Oryza sativa Japonica Group]
Os09g0514600	0.693471	0.464041	Cellular Component: plastid (GO:0009536);; Biological Process: response to hormone (GO:0009725);; Molecular Function: metal cluster binding (GO:0051540);;	K22071|3.84218e-82|osa:4347568|putidaredoxin	--	uncharacterized protein LOC4347568 [Oryza sativa Japonica Group]
Os03g0765900	0.225267	-1.09699	Cellular Component: intrinsic component of membrane (GO:0031224);; Cellular Component: thylakoid part (GO:0044436);;	--	--	uncharacterized protein LOC4334225 [Oryza sativa Japonica Group]
Os07g0571500	0.6064	0.599796	--	--	--	vacuole membrane protein KMS1 [Oryza sativa Japonica Group]
Os06g0687600	0.0413439	-1.4508	--	--	--	protein IRX15-LIKE [Oryza sativa Japonica Group]
Os02g0110400	0.266478	0.9536	Cellular Component: chloroplast thylakoid (GO:0009534);;	--	--	pentatricopeptide repeat-containing protein At2g37230 [Oryza sativa Japonica Group]
Os05g0131100	0.548225	-0.55005	Cellular Component: intracellular membrane-bounded organelle (GO:0043231);;	--	--	beta-carotene isomerase D27, chloroplastic isoform X1 [Oryza sativa Japonica Group]
Os12g0208900	0.362421	-0.981377	Molecular Function: nucleic acid binding (GO:0003676);; Biological Process: transcription, DNA-templated (GO:0006351);; Molecular Function: cation binding (GO:0043169);; Cellular Component: intracellular membrane-bounded organelle (GO:0043231);;	--	--	Os12g0208900 [Oryza sativa Japonica Group]
Os06g0686500	0.0266799	1.52759	--	--	--	mitochondrial intermediate peptidase, mitochondrial [Oryza sativa Japonica Group]
Os03g0328400	0.716953	0.234829	--	--	--	putative apyrase, partial [Oryza sativa]
Os03g0769600	0.0130198	1.06566	Cellular Component: chloroplast thylakoid (GO:0009534);; Cellular Component: intrinsic component of membrane (GO:0031224);; Biological Process: cellular protein complex assembly (GO:0043623);;	K07399|0|osa:4334251|cytochrome c biogenesis protein CCS1, chloroplastic	--	cytochrome c biogenesis protein CCS1, chloroplastic [Oryza sativa Japonica Group]
Os02g0722400	0.279926	-0.842435	--	--	--	probable amino acid permease 7 [Oryza sativa Japonica Group]
Os07g0670600	0.0559053	1.16209	Molecular Function: nucleic acid binding (GO:0003676);; Cellular Component: cytoplasm (GO:0005737);; Biological Process: ribosome biogenesis (GO:0042254);; Cellular Component: intracellular membrane-bounded organelle (GO:0043231);;	K07565|1.28717e-118|osa:4344241|60S ribosome subunit biogenesis protein NIP7 homolog	--	60S ribosome subunit biogenesis protein NIP7 homolog [Oryza sativa Japonica Group]
Os06g0288300	0.0200077	-1.33756	--	K23154|0|osa:9266253|UDP-glycosyltransferase 708A6	--	UDP-glucose:2-hydroxyflavanone C-glucosyltransferase-like [Oryza sativa Japonica Group]
Os01g0624500	0.50858	0.550325	--	K12795|2.6645e-63|osa:4326682|protein SGT1 homolog	Plant-pathogen interaction (ko04626)	suppressor of g2 allele of skp1, partial [Oryza sativa Indica Group]
Os01g0924300	0.399462	0.485097	--	K14791|0|osa:4327260|uncharacterized WD repeat-containing protein C17D11.16	--	uncharacterized WD repeat-containing protein C17D11.16 [Oryza sativa Japonica Group]
Os03g0109500	0.00959579	1.61806	--	K02962|9.16511e-99|osa:4331346|40S ribosomal protein S17-3	Ribosome (ko03010)	hypothetical protein OsI_09682 [Oryza sativa Indica Group]
Os07g0671700	0.996521	-0.00223999	--	K05931|0|osa:4344248|probable histone-arginine methyltransferase CARM1 isoform X2	--	probable histone-arginine methyltransferase CARM1 isoform X2 [Oryza sativa Japonica Group]
Os04g0272700	0.342144	0.549588	--	--	--	UDP-glycosyltransferase 92A1 [Oryza sativa Japonica Group]
Os01g0601651	0.530923	-0.716925	--	--	--	receptor-like protein EIX2 [Oryza sativa Japonica Group]
Os01g0896500	0.493109	-0.618535	--	--	--	uncharacterized protein LOC4325097 [Oryza sativa Japonica Group]
Os01g0623200	0.959736	0.137983	--	--	--	S-type anion channel SLAH2 isoform X1 [Oryza sativa Japonica Group]
Os01g0929200	0.0201942	-1.25643	Molecular Function: protein kinase activity (GO:0004672);; Biological Process: cellular protein modification process (GO:0006464);; Biological Process: phosphate-containing compound metabolic process (GO:0006796);; Cellular Component: intrinsic component of membrane (GO:0031224);; Molecular Function: purine ribonucleoside binding (GO:0032550);;	--	--	serine/threonine-protein kinase-like protein ACR4 isoform X1 [Oryza sativa Japonica Group]
Os09g0513100	0.000456961	4.71115	Molecular Function: transferase activity, transferring acyl groups other than amino-acyl groups (GO:0016747);; Cellular Component: intracellular membrane-bounded organelle (GO:0043231);; Biological Process: primary metabolic process (GO:0044238);;	K22389|0|osa:9269832|phospholipase A(1) LCAT3 isoform X1	Glycerophospholipid metabolism (ko00564);; alpha-Linolenic acid metabolism (ko00592)	unnamed protein product [Oryza sativa Japonica Group]
Os05g0586500	0.494575	0.522313	--	--	--	probable GABA transporter 2 [Oryza sativa Japonica Group]
Os05g0133900	0.749102	0.261001	Biological Process: DNA alkylation (GO:0006305);; Molecular Function: transferase activity, transferring one-carbon groups (GO:0016741);; Cellular Component: intrinsic component of membrane (GO:0031224);;	--	--	Os05g0133900 [Oryza sativa Japonica Group]
Os11g0461200	0.343511	0.820349	--	K22772|0|osa:9267603|anthocyanidin 3-O-glucosyltransferase	Flavone and flavonol biosynthesis (ko00944)	anthocyanidin 3-O-glucosyltransferase isoform X2 [Oryza sativa Japonica Group]
Os09g0115600	0.0209953	-0.809119	Cellular Component: plasma membrane (GO:0005886);; Biological Process: phosphate-containing compound metabolic process (GO:0006796);; Molecular Function: transferase activity, transferring phosphorus-containing groups (GO:0016772);; Cellular Component: intrinsic component of membrane (GO:0031224);; Molecular Function: phosphoric ester hydrolase activity (GO:0042578);; Biological Process: primary …	--	--	PI-PLC X domain-containing protein At5g67130 [Oryza sativa Japonica Group]
Os04g0298600	0.984885	-0.0124717	Biological Process: vacuole organization (GO:0007033);; Biological Process: vacuolar transport (GO:0007034);; Biological Process: flavonoid biosynthetic process (GO:0009813);; Cellular Component: intracellular membrane-bounded organelle (GO:0043231);; Cellular Component: membrane part (GO:0044425);; Biological Process: cell fate commitment (GO:0045165);;	K19513|0|osa:4335414|uncharacterized protein LOC4335414	--	protein TRANSPARENT TESTA 9 [Oryza sativa Japonica Group]
Os03g0132250	0.0173623	1.13117	--	--	--	expansin-like A1 isoform X1 [Setaria italica]
Os01g0817000	0.953736	-0.052162	--	K20858|2.04467e-165|osa:4327489|calcium uniporter protein 6, mitochondrial	--	calcium uniporter protein 6, mitochondrial [Oryza sativa Japonica Group]
Os02g0730300	0.176311	1.39221	--	K03549|0|osa:4330614|potassium transporter 25 isoform X2	--	potassium transporter 25 isoform X2 [Oryza sativa Japonica Group]
Os02g0690700	0.73757	0.192458	--	K11826|0|osa:4330379|AP-2 complex subunit mu	Endocytosis (ko04144)	AP-2 complex subunit mu [Oryza sativa Japonica Group]
Os07g0571900	0.875315	0.081209	--	K12817|0|osa:4343671|pre-mRNA-splicing factor 18	Spliceosome (ko03040)	pre-mRNA-splicing factor 18 [Oryza sativa Japonica Group]
Os02g0223700	0.204616	-0.484923	--	--	--	glycine-rich protein 1 [Oryza sativa Japonica Group]
Os08g0359200	0.812424	0.187818	--	K18693|0|osa:4345367|lipid phosphate phosphatase 2	Glycerolipid metabolism (ko00561);; Glycerophospholipid metabolism (ko00564)	lipid phosphate phosphatase 2 [Oryza sativa Japonica Group]
Os07g0162600	0.017967	2.70677	--	--	--	probable carboxylesterase 15 [Oryza sativa Japonica Group]
Os04g0430800	0.655747	-0.317696	--	K03671|3.87966e-86|osa:9270732|thioredoxin M3, chloroplastic	--	Os04g0430800, partial [Oryza sativa Japonica Group]
Os03g0113100	0.616293	0.40078	--	K00857|2.3406e-161|osa:4331376|thymidine kinase isoform X1	Pyrimidine metabolism (ko00240)	thymidine kinase isoform X1 [Oryza sativa Japonica Group]
Os03g0741700	0.506202	0.525737	Cellular Component: intracellular membrane-bounded organelle (GO:0043231);; Molecular Function: transition metal ion binding (GO:0046914);;	K16277|8.41485e-123|osa:9268320|E3 ubiquitin protein ligase DRIP2	--	E3 ubiquitin protein ligase DRIP2 [Oryza sativa Japonica Group]
Os07g0671000	0.000886039	-2.56913	--	--	--	flowering-promoting factor 1-like protein 5 [Oryza sativa Japonica Group]
Os02g0173200	0.162219	2.53837	--	--	--	transcription factor MafA [Oryza sativa Japonica Group]
Os07g0631700	0.982487	-0.0376535	Cellular Component: intrinsic component of membrane (GO:0031224);; Molecular Function: metal ion binding (GO:0046872);;	--	--	probable calcium-binding protein CML45 [Oryza sativa Japonica Group]
Os02g0225300	0.835287	-0.144912	Cellular Component: intrinsic component of membrane (GO:0031224);;	--	--	uncharacterized protein LOC4328776 [Oryza sativa Japonica Group]
Os02g0109200	0.742245	-0.298464	--	--	--	Os02g0109200, partial [Oryza sativa Japonica Group]
Os12g0406000	0.822208	0.2924	--	--	--	Os12g0406000, partial [Oryza sativa Japonica Group]
Os02g0688900	0.615721	-0.205102	Biological Process: protein lipidation (GO:0006497);; Cellular Component: intrinsic component of membrane (GO:0031224);; Biological Process: single-organism cellular process (GO:0044763);;	K05293|0|osa:4330366|phosphatidylinositol glycan anchor biosynthesis class U protein	Glycosylphosphatidylinositol (GPI)-anchor biosynthesis (ko00563)	phosphatidylinositol glycan anchor biosynthesis class U protein [Oryza sativa Japonica Group]
Os06g0133600	0.585912	-0.545895	Cellular Component: cell wall (GO:0005618);; Cellular Component: cell-cell junction (GO:0005911);;	--	--	protein EXORDIUM-like 3 [Oryza sativa Japonica Group]
Os11g0131900	0.0316697	1.21744	Molecular Function: hydrolase activity, hydrolyzing O-glycosyl compounds (GO:0004553);; Biological Process: arabinose metabolic process (GO:0019566);;	--	--	alpha-L-arabinofuranosidase 1 isoform X2 [Oryza sativa Japonica Group]
Os06g0494000	0.246607	-0.855787	Biological Process: transcription, DNA-templated (GO:0006351);; Cellular Component: intrinsic component of membrane (GO:0031224);; Cellular Component: macromolecular complex (GO:0032991);; Cellular Component: intracellular organelle part (GO:0044446);;	--	--	Os06g0494000, partial [Oryza sativa Japonica Group]
Os07g0466300	0.933072	0.119975	--	--	--	Os07g0466300, partial [Oryza sativa Japonica Group]
Os05g0161400	0.827883	-0.187167	Biological Process: purine ribonucleotide metabolic process (GO:0009150);; Cellular Component: intracellular membrane-bounded organelle (GO:0043231);; Molecular Function: metal ion binding (GO:0046872);;	--	--	uncharacterized protein LOC4337889 isoform X1 [Oryza sativa Japonica Group]
Os04g0430000	0.550876	-0.535351	Molecular Function: protein kinase activity (GO:0004672);; Biological Process: cellular protein modification process (GO:0006464);; Molecular Function: transferase activity, transferring pentosyl groups (GO:0016763);; Biological Process: nicotinate nucleotide biosynthetic process (GO:0019357);; Biological Process: nicotinamide nucleotide biosynthetic process (GO:0019359);; Cellular Component: int…	--	--	probable serine/threonine-protein kinase At1g01540 [Oryza sativa Japonica Group]
Os02g0175600	0.00322536	1.20457	--	K02900|1.23516e-78|osa:4328472|60S ribosomal protein L27a-3	Ribosome (ko03010)	60S ribosomal protein L27a-3 [Oryza sativa Japonica Group]
Os02g0176000	0.845667	-1.05189	Cellular Component: cell part (GO:0044464);; Molecular Function: transition metal ion binding (GO:0046914);;	--	--	B-box zinc finger protein 32 [Oryza sativa Japonica Group]
Os02g0181300	0.655043	1.05433	Molecular Function: nucleic acid binding transcription factor activity (GO:0001071);; Molecular Function: DNA binding (GO:0003677);; Biological Process: transcription, DNA-templated (GO:0006351);; Biological Process: response to stress (GO:0006950);; Biological Process: diterpenoid metabolic process (GO:0016101);; Cellular Component: intracellular membrane-bounded organelle (GO:0043231);;	--	--	RecName: Full=WRKY transcription factor WRKY71; Short=OsWRKY71
Os03g0165600	0.385976	0.400633	Molecular Function: ubiquitin-like protein-specific protease activity (GO:0019783);; Molecular Function: cation binding (GO:0043169);; Biological Process: protein modification by small protein removal (GO:0070646);;	--	--	uncharacterized protein LOC4331732 isoform X3 [Oryza sativa Japonica Group]
Os06g0114500	0.0220121	0.856083	--	--	--	uncharacterized protein LOC4339914 [Oryza sativa Japonica Group]
Os01g0817800	0.666856	0.246781	Cellular Component: intracellular membrane-bounded organelle (GO:0043231);;	--	--	uncharacterized protein LOC4327494 isoform X1 [Oryza sativa Japonica Group]
Os05g0159200	0.669201	0.381656	Molecular Function: hydrolase activity (GO:0016787);; Cellular Component: intrinsic component of membrane (GO:0031224);;	--	--	GDSL esterase/lipase At1g09390 [Oryza sativa Japonica Group]
Os06g0647500	0.423008	0.497985	--	--	--	Os06g0647500 [Oryza sativa Japonica Group]
Os10g0441800	0.321423	0.663396	Molecular Function: nucleic acid binding (GO:0003676);; Biological Process: transcription, DNA-templated (GO:0006351);; Biological Process: protein localization (GO:0008104);; Cellular Component: endosome membrane (GO:0010008);; Biological Process: cytosolic transport (GO:0016482);; Molecular Function: nucleoside-triphosphatase activity (GO:0017111);; Molecular Function: purine ribonucleoside bin…	--	--	ras-related protein RABF1 [Oryza sativa Japonica Group]
Os07g0114000	0.735824	0.497876	Molecular Function: phosphoprotein phosphatase activity (GO:0004721);; Biological Process: cellular protein modification process (GO:0006464);; Molecular Function: cation binding (GO:0043169);; Cellular Component: intracellular membrane-bounded organelle (GO:0043231);;	K01102|0|osa:4342246|probable protein phosphatase 2C 61	--	probable protein phosphatase 2C 61 isoform X1 [Oryza sativa Japonica Group]
Os01g0848475	0.57789	0.658055	Molecular Function: nucleic acid binding transcription factor activity (GO:0001071);; Molecular Function: nucleic acid binding (GO:0003676);; Biological Process: transcription, DNA-templated (GO:0006351);; Cellular Component: intracellular membrane-bounded organelle (GO:0043231);;	--	--	qSH-1 [Oryza sativa Indica Group]
Os03g0249700	0.653326	0.205219	Cellular Component: intrinsic component of membrane (GO:0031224);;	--	--	uncharacterized protein LOC9272607 [Oryza sativa Japonica Group]
Os08g0507702	0.110625	-1.48827	--	--	--	cytochrome P450 76M5-like [Oryza sativa Japonica Group]
Os02g0111700	0.0553571	1.07852	--	K02922|1.73008e-60|osa:4328048|60S ribosomal protein L37-1	Ribosome (ko03010)	PREDICTED: 60S ribosomal protein L37-1-like [Oryza brachyantha]
Os01g0814700	0.747661	0.279915	--	--	--	F-box protein SKIP24 isoform X1 [Oryza sativa Japonica Group]
Os06g0296700	0.162274	-1.30477	--	--	--	uncharacterized protein LOC4340805 isoform X1 [Oryza sativa Japonica Group]
Os07g0211101	0.220273	-0.693703	--	--	--	Os07g0211101 [Oryza sativa Japonica Group]
Os03g0111800	0.717416	0.22034	--	--	--	uncharacterized protein LOC4331367 isoform X1 [Oryza sativa Japonica Group]
Os04g0226800	0.559452	0.622594	Biological Process: cellular protein modification process (GO:0006464);; Molecular Function: kinase activity (GO:0016301);; Cellular Component: intrinsic component of membrane (GO:0031224);; Molecular Function: purine ribonucleoside binding (GO:0032550);; Cellular Component: intracellular membrane-bounded organelle (GO:0043231);;	--	--	hypothetical protein OsI_14473 [Oryza sativa Indica Group]
Os02g0721800	0.582014	0.542415	Biological Process: translation (GO:0006412);; Molecular Function: ligase activity, forming aminoacyl-tRNA and related compounds (GO:0016876);; Molecular Function: purine ribonucleoside binding (GO:0032550);; Cellular Component: cell part (GO:0044464);; Biological Process: establishment of localization (GO:0051234);;	--	--	phosphatidylinositol/phosphatidylcholine transfer protein SFH9 isoform X1 [Oryza sativa Japonica Group]
Os05g0159000	0.799457	-0.126681	--	K10589|0|osa:4337876|E3 ubiquitin-protein ligase UPL6 isoform X1	Ubiquitin mediated proteolysis (ko04120)	hypothetical protein OsJ_17200 [Oryza sativa Japonica Group]
Os09g0514700	0.237853	0.862505	--	--	--	hypothetical protein OsJ_30001 [Oryza sativa Japonica Group]
Os04g0581100	0.930621	0.456067	--	K24028|0|osa:4336765|naringenin,2-oxoglutarate 3-dioxygenase	--	protein DMR6-LIKE OXYGENASE 1 [Oryza sativa Japonica Group]
Os06g0238000	0.305918	-0.635195	--	--	--	U-box domain-containing protein 39 [Oryza sativa Japonica Group]
Os02g0697900	0.213561	-1.04628	--	--	--	Os02g0697900 [Oryza sativa Japonica Group]
Os03g0165350	0.854016	-0.271366	Molecular Function: nucleic acid binding (GO:0003676);; Biological Process: transcription, DNA-templated (GO:0006351);; Cellular Component: intracellular membrane-bounded organelle (GO:0043231);;	--	--	Putative homeodomain protein [Oryza sativa Japonica Group]
Os03g0740800	0.922357	-0.096984	Molecular Function: nucleic acid binding (GO:0003676);; Biological Process: DNA repair (GO:0006281);; Cellular Component: intracellular membrane-bounded organelle (GO:0043231);;	K10886|0|osa:4334058|DNA repair protein XRCC4	Non-homologous end-joining (ko03450)	DNA repair protein XRCC4 [Oryza sativa Japonica Group]
Os06g0115400	0.591262	0.594261	--	K04564|0|osa:4339922|superoxide dismutase [Fe] 1, chloroplastic	Peroxisome (ko04146)	superoxide dismutase [Fe] 1, chloroplastic [Oryza sativa Japonica Group]
Os01g0933600	0.660619	0.222823	Cellular Component: intracellular membrane-bounded organelle (GO:0043231);;	--	--	uncharacterized protein LOC9268621 [Oryza sativa Japonica Group]
Os06g0327300	0.205189	-0.66899	Biological Process: superoxide metabolic process (GO:0006801);; Molecular Function: disulfide oxidoreductase activity (GO:0015036);; Cellular Component: intracellular membrane-bounded organelle (GO:0043231);; Biological Process: single-organism metabolic process (GO:0044710);;	K00384|0|osa:4340912|thioredoxin reductase NTRA	Selenocompound metabolism (ko00450)	Os06g0327300, partial [Oryza sativa Japonica Group]
Os07g0498300	0.758626	0.159294	Cellular Component: mitochondrion (GO:0005739);; Cellular Component: intrinsic component of membrane (GO:0031224);; Cellular Component: vacuolar part (GO:0044437);;	--	--	uncharacterized protein LOC4343303 [Oryza sativa Japonica Group]
Os04g0561600	0.205674	0.763597	--	--	--	hypothetical protein OsI_16977 [Oryza sativa Indica Group]
Os07g0671500	0.723808	-0.469239	Molecular Function: catalytic activity (GO:0003824);; Biological Process: response to radiation (GO:0009314);; Cellular Component: plastid envelope (GO:0009526);; Biological Process: response to hormone (GO:0009725);;	--	--	Os07g0671500, partial [Oryza sativa Japonica Group]
Os01g0502400	0.94008	0.0495651	Molecular Function: oxidoreductase activity (GO:0016491);; Molecular Function: vitamin binding (GO:0019842);; Biological Process: single-organism metabolic process (GO:0044710);; Molecular Function: transition metal ion binding (GO:0046914);;	--	--	uncharacterized PKHD-type hydroxylase At1g22950 [Oryza sativa Japonica Group]
Os10g0466800	0.234668	-0.587482	--	--	--	uncharacterized protein LOC4348847 [Oryza sativa Japonica Group]
Os07g0498800	0.362733	0.539893	Cellular Component: cytoplasm (GO:0005737);;	--	--	ubiquitin-like domain-containing protein CIP73 isoform X1 [Oryza sativa Japonica Group]
Os04g0498600	0.897189	-0.0835849	--	K01611|0|osa:4336294|S-adenosylmethionine decarboxylase proenzyme isoform X1	Cysteine and methionine metabolism (ko00270);; Arginine and proline metabolism (ko00330)	OSJNBa0029H02.4 [Oryza sativa Japonica Group]
Os07g0162700	0.00655972	-1.7522	--	--	--	probable carboxylesterase 15 [Oryza sativa Japonica Group]
Os03g0593200	0.558926	-0.34247	Molecular Function: nucleotide binding (GO:0000166);; Molecular Function: oxidoreductase activity (GO:0016491);; Cellular Component: intrinsic component of membrane (GO:0031224);; Cellular Component: intracellular membrane-bounded organelle (GO:0043231);; Biological Process: single-organism metabolic process (GO:0044710);; Molecular Function: tetrapyrrole binding (GO:0046906);; Molecular Function…	--	--	Os03g0593200, partial [Oryza sativa Japonica Group]
Os04g0542000	0.451927	1.4632	Molecular Function: nucleic acid binding (GO:0003676);; Molecular Function: protein binding (GO:0005515);; Cellular Component: intracellular membrane-bounded organelle (GO:0043231);;	--	--	uncharacterized protein LOC9272389 [Oryza sativa Japonica Group]
Os09g0110200	0.189308	0.966261	--	--	--	pentatricopeptide repeat-containing protein At1g79540 [Oryza sativa Japonica Group]
Os04g0583500	0.167473	0.956867	Cellular Component: external encapsulating structure (GO:0030312);; Biological Process: cell wall organization (GO:0071555);;	--	--	Os04g0583500 [Oryza sativa Japonica Group]
Os04g0270200	0.541859	0.379164	Cellular Component: intrinsic component of membrane (GO:0031224);;	K23569|1.0095e-113|osa:4335339|ER membrane protein complex subunit 8/9 homolog	--	ER membrane protein complex subunit 8/9 homolog [Oryza sativa Japonica Group]
Os12g0406200	0.000184943	1.41098	--	K02984|6.86622e-176|osa:4352048|40S ribosomal protein S3a-like	Ribosome (ko03010)	40S ribosomal protein S3a-like [Oryza sativa Japonica Group]
Os03g0248600	0.0130209	0.822997	Biological Process: pyruvate metabolic process (GO:0006090);; Molecular Function: hydro-lyase activity (GO:0016836);; Cellular Component: cytosolic part (GO:0044445);; Molecular Function: metal ion binding (GO:0046872);;	K01689|0|osa:4332253|enolase-like	Glycolysis / Gluconeogenesis (ko00010);; Carbon metabolism (ko01200);; Biosynthesis of amino acids (ko01230);; RNA degradation (ko03018)	enolase-like [Oryza sativa Japonica Group]
Os01g0850200	0.689103	-0.236695	Cellular Component: intrinsic component of membrane (GO:0031224);; Molecular Function: transition metal ion binding (GO:0046914);;	--	--	uncharacterized protein LOC9267992 isoform X1 [Oryza sativa Japonica Group]
Os06g0134466	0.738002	0.278623	--	--	--	hypothetical protein [Oryza sativa Japonica Group]
Os10g0180000	0.94015	0.0847037	--	K20870|0|osa:4348204|probable glucuronosyltransferase GUT1 isoform X1	--	probable glucuronosyltransferase GUT1 isoform X1 [Oryza sativa Japonica Group]
Os05g0498900	0.0556136	-1.15765	Molecular Function: protein kinase activity (GO:0004672);; Biological Process: cellular protein modification process (GO:0006464);; Biological Process: phosphate-containing compound metabolic process (GO:0006796);; Molecular Function: purine ribonucleoside binding (GO:0032550);;	--	--	probable serine/threonine-protein kinase PBL7 [Oryza sativa Japonica Group]
Os11g0102600	0.647631	-0.345823	--	K16546|0|osa:4349533|protein TONNEAU 1a	--	protein TONNEAU 1a [Oryza sativa Japonica Group]
Os02g0729700	0.716641	-0.344853	Molecular Function: nucleic acid binding transcription factor activity (GO:0001071);; Molecular Function: DNA binding (GO:0003677);; Biological Process: transcription, DNA-templated (GO:0006351);; Cellular Component: intracellular membrane-bounded organelle (GO:0043231);;	K09338|6.35656e-168|osa:4330610|homeobox-leucine zipper protein HOX16 isoform X1	--	homeobox-leucine zipper protein HOX16 isoform X1 [Oryza sativa Japonica Group]
Os05g0279300	0.327277	0.657394	Molecular Function: nucleic acid binding (GO:0003676);; Biological Process: tRNA metabolic process (GO:0006399);; Biological Process: RNA modification (GO:0009451);; Molecular Function: intramolecular transferase activity (GO:0016866);; Cellular Component: intrinsic component of membrane (GO:0031224);;	K06173|2.74079e-158|osa:9267107|tRNA pseudouridine synthase A 1	--	uncharacterized protein LOC9267107 isoform X2 [Oryza sativa Japonica Group]
Os12g0405700	0.0515489	0.792917	--	--	--	hypothetical protein OsJ_35848 [Oryza sativa Japonica Group]
Os05g0159300	0.255048	1.44283	Molecular Function: hydrolase activity (GO:0016787);; Cellular Component: intrinsic component of membrane (GO:0031224);;	--	--	hypothetical protein OsI_18550 [Oryza sativa Indica Group]
Os06g0701400	0.0002467	1.5293	--	K02942|1.72077e-23|osa:4341969|60S acidic ribosomal protein P3	Ribosome (ko03010)	60S acidic ribosomal protein P3 [Oryza sativa Japonica Group]
Os01g0930000	0.711803	0.415839	Cellular Component: intracellular membrane-bounded organelle (GO:0043231);;	--	--	hypothetical protein OsI_05045 [Oryza sativa Indica Group]
Os02g0174900	0.716891	-0.392893	--	--	--	hypothetical protein OsI_06054 [Oryza sativa Indica Group]
Os06g0489200	0.395974	0.640949	--	K13123|0|osa:4341077|G patch domain-containing protein TGH homolog	--	G patch domain-containing protein TGH homolog [Oryza sativa Japonica Group]
Os05g0421900	0.826764	0.389219	--	--	--	gibberellin 20 oxidase 2-like [Oryza sativa Japonica Group]
Os07g0571100	0.330734	-0.487754	--	--	--	protein TIME FOR COFFEE [Oryza sativa Japonica Group]
Os05g0129100	0.84423	-0.17188	--	--	--	Os05g0129100, partial [Oryza sativa Japonica Group]
Os11g0103000	0.0521609	-1.46187	Biological Process: RNA processing (GO:0006396);; Cellular Component: plastid stroma (GO:0009532);; Molecular Function: RNA binding (GO:0044822);;	--	--	hypothetical protein OsI_37125 [Oryza sativa Indica Group]
Os12g0209100	0.525029	0.47286	--	K17402|1.83491e-114|osa:4351768|uncharacterized protein LOC4351768	--	uncharacterized protein LOC4351768 [Oryza sativa Japonica Group]
Os01g0894700	0.436896	-0.765941	Biological Process: protein localization (GO:0008104);; Biological Process: cellular process (GO:0009987);; Cellular Component: intrinsic component of membrane (GO:0031224);;	--	--	uncharacterized protein LOC4324965 isoform X3 [Oryza sativa Japonica Group]
Os02g0224200	0.776305	-0.13246	Cellular Component: protein serine/threonine phosphatase complex (GO:0008287);; Biological Process: regulation of phosphoprotein phosphatase activity (GO:0043666);;	K04354|0|osa:4328769|serine/threonine protein phosphatase 2A 55 kDa regulatory subunit B beta isoform isoform X1	mRNA surveillance pathway (ko03015)	hypothetical protein OsJ_05943 [Oryza sativa Japonica Group]
Os04g0641400	0.997766	-0.00267464	--	--	--	Os04g0641400, partial [Oryza sativa Japonica Group]
Os03g0246800	0.730276	-0.168192	--	--	--	Os03g0246800 [Oryza sativa Japonica Group]
Os05g0132100	0.0624452	-1.71768	Biological Process: fatty acid metabolic process (GO:0006631);; Biological Process: macromolecule biosynthetic process (GO:0009059);; Molecular Function: fatty acid ligase activity (GO:0015645);; Cellular Component: intracellular membrane-bounded organelle (GO:0043231);;	K01897|0|osa:4337714|long chain acyl-CoA synthetase 1	Fatty acid biosynthesis (ko00061);; Fatty acid degradation (ko00071);; Fatty acid metabolism (ko01212);; Peroxisome (ko04146)	long chain acyl-CoA synthetase 1 [Oryza sativa Japonica Group]
Os02g0732700	0.578872	-0.279064	Cellular Component: protein complex (GO:0043234);;	K15166|0|osa:4330633|mediator of RNA polymerase II transcription subunit 23 isoform X1	--	mediator of RNA polymerase II transcription subunit 23 isoform X1 [Oryza sativa Japonica Group]
Os02g0225000	0.392709	-0.676134	--	K13354|0|osa:4328774|peroxisomal nicotinamide adenine dinucleotide carrier	Peroxisome (ko04146)	peroxisomal nicotinamide adenine dinucleotide carrier [Oryza sativa Japonica Group]
Os05g0569400	0.660229	0.442559	Molecular Function: catalytic activity (GO:0003824);; Molecular Function: binding (GO:0005488);; Biological Process: primary metabolic process (GO:0044238);;	K01792|1.30628e-103|osa:4339654|putative glucose-6-phosphate 1-epimerase	Glycolysis / Gluconeogenesis (ko00010)	Os05g0569400, partial [Oryza sativa Japonica Group]
Os06g0551400	0.0798871	1.46929	Molecular Function: nucleic acid binding (GO:0003676);; Biological Process: protein localization (GO:0008104);; Cellular Component: membrane (GO:0016020);; Molecular Function: purine ribonucleoside binding (GO:0032550);; Biological Process: intracellular signal transduction (GO:0035556);; Cellular Component: cell part (GO:0044464);;	K07904|7.94541e-156|osa:4341266|ras-related protein RIC2	Endocytosis (ko04144)	ras-related protein RIC2 [Oryza sativa Japonica Group]
Os04g0253000	0.343705	-0.71706	Cellular Component: chromatin (GO:0000785);; Molecular Function: nucleic acid binding (GO:0003676);; Cellular Component: intrinsic component of membrane (GO:0031224);; Biological Process: nucleosome organization (GO:0034728);; Cellular Component: intracellular membrane-bounded organelle (GO:0043231);;	K11275|4.32359e-41|osa:4335314|histone H1	--	Os04g0253000, partial [Oryza sativa Japonica Group]
Os03g0132800	0.0990836	1.70498	Biological Process: cellular protein modification process (GO:0006464);; Biological Process: phosphate-containing compound metabolic process (GO:0006796);; Molecular Function: kinase activity (GO:0016301);; Molecular Function: purine ribonucleoside binding (GO:0032550);;	K14500|0|osa:4331518|probable serine/threonine-protein kinase At4g35230	Plant hormone signal transduction (ko04075)	serine/threonine-protein kinase BSK1-2-like [Oryza sativa Japonica Group]
Os07g0464600	0.198421	-0.862644	--	K05657|0|osa:4343172|ABC transporter B family member 28	ABC transporters (ko02010)	ABC transporter B family member 28 [Oryza sativa Japonica Group]
Os02g0729400	0.0899543	-1.44793	Biological Process: response to light stimulus (GO:0009416);; Cellular Component: chloroplast thylakoid (GO:0009534);; Biological Process: regulation of stomatal movement (GO:0010119);; Biological Process: response to calcium ion (GO:0051592);;	--	--	calcium sensing receptor, chloroplastic [Oryza sativa Japonica Group]
Os02g0323000	0.0321072	-1.40228	--	K05658|0|osa:9270100|ABC transporter B family member 9 isoform X1	ABC transporters (ko02010)	ABC transporter B family member 9 [Oryza sativa Japonica Group]
Os02g0734900	0.000594653	3.71728	Biological Process: protein transport (GO:0015031);; Cellular Component: intrinsic component of membrane (GO:0031224);; Cellular Component: intracellular membrane-bounded organelle (GO:0043231);;	--	--	uncharacterized protein LOC4330647 [Oryza sativa Japonica Group]
Os03g0593700	0.541182	-0.695572	--	--	--	Os03g0593700 [Oryza sativa Japonica Group]
Os02g0181800	0.768418	0.254996	Biological Process: modification-dependent protein catabolic process (GO:0019941);;	--	--	Os02g0181800, partial [Oryza sativa Japonica Group]
Os01g0895100	0.697112	-0.188046	--	K03969|0|osa:4324967|probable membrane-associated 30 kDa protein, chloroplastic	--	probable membrane-associated 30 kDa protein, chloroplastic [Oryza sativa Japonica Group]
Os05g0586200	0.00299883	-1.18077	Biological Process: activation of innate immune response (GO:0002218);; Biological Process: response to radiation (GO:0009314);; Biological Process: response to hormone (GO:0009725);; Molecular Function: acid-amino acid ligase activity (GO:0016881);; Biological Process: monocarboxylic acid metabolic process (GO:0032787);; Biological Process: growth (GO:0040007);; Biological Process: single-multic…	K14506|0|osa:4339756|jasmonic acid-amido synthetase JAR1	Plant hormone signal transduction (ko04075)	jasmonic acid-amido synthetase JAR1 [Oryza sativa Japonica Group]
Os01g0934500	0.691358	-0.395803	--	--	--	putative pir7b protein [Oryza sativa Japonica Group]
Os11g0121500	0.405703	0.739773	Molecular Function: protein kinase activity (GO:0004672);; Biological Process: cellular protein modification process (GO:0006464);; Biological Process: phosphate-containing compound metabolic process (GO:0006796);; Cellular Component: intrinsic component of membrane (GO:0031224);; Molecular Function: purine ribonucleoside binding (GO:0032550);;	--	--	Os11g0121500 [Oryza sativa Japonica Group]
Os08g0265500	0.710633	0.320348	Molecular Function: purine ribonucleoside binding (GO:0032550);; Cellular Component: intracellular membrane-bounded organelle (GO:0043231);;	K18798|0|osa:4345118|lactation elevated protein 1	--	hypothetical protein OsJ_26663 [Oryza sativa Japonica Group]
Os08g0508700	3.64e-07	-2.92209	--	K14514|0|osa:4345992|ETHYLENE INSENSITIVE 3-like 3 protein	MAPK signaling pathway - plant (ko04016);; Plant hormone signal transduction (ko04075)	ETHYLENE INSENSITIVE 3-like 3 protein [Oryza sativa Japonica Group]
Os02g0232500	0.754376	-0.185905	Molecular Function: protein kinase activity (GO:0004672);; Biological Process: cellular protein modification process (GO:0006464);; Cellular Component: intrinsic component of membrane (GO:0031224);; Molecular Function: purine ribonucleoside binding (GO:0032550);;	--	--	disease resistance protein Cf-2.1-like [Oryza sativa Japonica Group]
Os02g0175800	0.943206	-0.0758131	--	--	--	uncharacterized protein LOC9268832 [Oryza sativa Japonica Group]
Os05g0500101	0.103665	-1.02288	--	--	--	scopoletin glucosyltransferase [Oryza sativa Japonica Group]
Os11g0129200	0.0886674	-1.51866	Molecular Function: secondary active transmembrane transporter activity (GO:0015291);; Biological Process: drug transport (GO:0015893);; Cellular Component: intrinsic component of membrane (GO:0031224);;	K03327|0|osa:4351384|protein DETOXIFICATION 21	--	hypothetical protein OsI_37326 [Oryza sativa Indica Group]
Os01g0934000	0.862225	0.157706	--	K22991|0|osa:4326829|autophagy-related protein 18a	--	hypothetical protein OsI_05078 [Oryza sativa Indica Group]
Os10g0468500	0.234358	2.26609	Molecular Function: protein kinase activity (GO:0004672);; Biological Process: cellular protein modification process (GO:0006464);; Cellular Component: intrinsic component of membrane (GO:0031224);; Molecular Function: purine ribonucleoside binding (GO:0032550);;	--	--	MDIS1-interacting receptor like kinase 2 [Oryza sativa Japonica Group]
Os09g0115500	0.0152777	-1.56155	Cellular Component: intracellular membrane-bounded organelle (GO:0043231);;	--	--	CBS domain-containing protein CBSX1, chloroplastic [Oryza sativa Japonica Group]
Os06g0114700	0.955691	-0.0390461	--	--	--	uncharacterized protein LOC4339916 [Oryza sativa Japonica Group]
Os02g0281000	0.0344792	-1.27452	Biological Process: cellular protein modification process (GO:0006464);; Cellular Component: membrane (GO:0016020);; Molecular Function: kinase activity (GO:0016301);; Molecular Function: phosphatase activity (GO:0016791);; Molecular Function: purine ribonucleoside binding (GO:0032550);; Molecular Function: cation binding (GO:0043169);;	--	--	protein phosphatase 2C and cyclic nucleotide-binding/kinase domain-containing protein isoform X2 [Oryza sativa Japonica Group]
Os09g0281600	0.412519	-0.277574	Molecular Function: nucleic acid binding (GO:0003676);; Biological Process: gene expression (GO:0010467);; Cellular Component: intrinsic component of membrane (GO:0031224);;	K13096|6.88118e-146|osa:4346613|SURP and G-patch domain-containing protein 1-like protein	--	SURP and G-patch domain-containing protein 1-like protein [Oryza sativa Japonica Group]
Os01g0935300	0.63089	0.37307	Biological Process: modification-dependent protein catabolic process (GO:0019941);; Molecular Function: ubiquitin-like protein ligase binding (GO:0044389);;	--	--	putative cullin-like protein 1 isoform X2 [Oryza sativa Japonica Group]
Os07g0209800	0.99569	0.00489699	Molecular Function: nucleic acid binding transcription factor activity (GO:0001071);; Molecular Function: DNA binding (GO:0003677);; Biological Process: transcription, DNA-templated (GO:0006351);; Cellular Component: intracellular membrane-bounded organelle (GO:0043231);;	K09060|1.01733e-130|osa:4342706|DNA-binding protein EMBP-1	--	hypothetical protein OsJ_23527 [Oryza sativa Japonica Group]
Os01g0273150	0.933994	0.155353	Biological Process: transcription, DNA-templated (GO:0006351);;	--	--	Os01g0273150 [Oryza sativa Japonica Group]
Os07g0439000	0.709571	0.347962	Cellular Component: intracellular membrane-bounded organelle (GO:0043231);;	--	--	unnamed protein product [Oryza sativa Japonica Group]
Os05g0419600	0.473056	0.734127	Cellular Component: intrinsic component of membrane (GO:0031224);;	--	--	uncharacterized protein LOC4338819 [Oryza sativa Japonica Group]
Os10g0430900	0.339617	-0.394756	Molecular Function: protein kinase activity (GO:0004672);; Biological Process: cellular protein modification process (GO:0006464);; Molecular Function: purine ribonucleoside binding (GO:0032550);;	--	--	hypothetical protein OsI_33706 [Oryza sativa Indica Group]
Os05g0572000	0.0463563	2.23642	Molecular Function: nucleic acid binding transcription factor activity (GO:0001071);; Molecular Function: nucleic acid binding (GO:0003676);; Biological Process: transcription, DNA-templated (GO:0006351);; Cellular Component: intracellular membrane-bounded organelle (GO:0043231);;	--	--	ethylene-responsive transcription factor ERF061 [Oryza sativa Japonica Group]
Os07g0253000	0.0233211	-1.00105	--	--	--	uncharacterized protein LOC4342852 [Oryza sativa Japonica Group]
Os02g0731600	0.409839	-0.87172	Cellular Component: intrinsic component of membrane (GO:0031224);; Cellular Component: intracellular membrane-bounded organelle (GO:0043231);;	--	--	protein CURVATURE THYLAKOID 1A, chloroplastic [Oryza sativa Japonica Group]
Os02g0175900	0.574915	0.681107	--	K13105|0|osa:4328475|proline-rich protein PRCC	--	proline-rich protein PRCC [Oryza sativa Japonica Group]
Os01g0385400	9.98e-06	6.84791	--	--	--	S-type anion channel SLAH2 [Oryza sativa Japonica Group]
Os01g0600400	0.995139	-0.00608255	--	--	--	putative pentatricopeptide repeat-containing protein At3g25970 [Oryza sativa Japonica Group]
Os10g0465900	0.00528213	4.03037	--	K01177|2.1099e-153|osa:4348840|uncharacterized protein LOC4348840	Starch and sucrose metabolism (ko00500)	Os10g0465900 [Oryza sativa Japonica Group]
Os03g0247900	0.0597149	2.73202	Molecular Function: carboxylic acid binding (GO:0031406);;	--	--	ACT domain-containing protein ACR8 [Oryza sativa Japonica Group]
Os08g0207000	0.600322	0.569092	Molecular Function: structural molecule activity (GO:0005198);; Cellular Component: ribosome (GO:0005840);; Biological Process: gene expression (GO:0010467);;	--	--	Os08g0207000, partial [Oryza sativa Japonica Group]
Os04g0254000	0.233837	0.492587	Biological Process: lysine biosynthetic process (GO:0009085);; Cellular Component: plastid (GO:0009536);; Molecular Function: hydro-lyase activity (GO:0016836);;	K01714|0|osa:4335317|4-hydroxy-tetrahydrodipicolinate synthase 1, chloroplastic	Monobactam biosynthesis (ko00261);; Lysine biosynthesis (ko00300);; Biosynthesis of amino acids (ko01230)	4-hydroxy-tetrahydrodipicolinate synthase 1, chloroplastic [Oryza sativa Japonica Group]
Os11g0106000	0.94352	0.0440014	Molecular Function: pattern binding (GO:0001871);; Molecular Function: organic cyclic compound binding (GO:0097159);;	--	--	hypothetical protein LOC_Os11g01460 [Oryza sativa Japonica Group]
Os09g0114500	0.146157	-0.845772	--	--	--	kinesin-like protein KIN-4A isoform X1 [Oryza sativa Japonica Group]
Os05g0215600	0.709571	-0.384375	--	--	--	unnamed protein product [Oryza sativa Japonica Group]
Os04g0227000	0.451292	-0.62004	Biological Process: cellular protein modification process (GO:0006464);; Molecular Function: kinase activity (GO:0016301);; Cellular Component: intrinsic component of membrane (GO:0031224);; Molecular Function: purine ribonucleoside binding (GO:0032550);;	--	--	unnamed protein product [Oryza sativa Japonica Group]
Os02g0173100	0.249451	0.432036	--	--	--	hypothetical protein OsJ_05566 [Oryza sativa Japonica Group]
Os03g0109600	0.628375	0.340393	Biological Process: transcription, DNA-templated (GO:0006351);; Cellular Component: intrinsic component of membrane (GO:0031224);;	--	--	Os03g0109600, partial [Oryza sativa Japonica Group]
Os05g0214900	0.597498	-0.475311	--	--	--	unknown protein [Oryza sativa Japonica Group]
Os10g0442700	0.71182	0.264408	--	--	--	pentatricopeptide repeat-containing protein At5g08305 [Oryza sativa Japonica Group]
Os06g0355500	0.867777	0.0967838	Molecular Function: nucleic acid binding (GO:0003676);; Cellular Component: intracellular membrane-bounded organelle (GO:0043231);;	--	--	LOW QUALITY PROTEIN: bromodomain-containing factor 2-like [Oryza sativa Japonica Group]
Os09g0434900	0.198025	-1.04942	--	--	--	probable E3 ubiquitin-protein ligase RNF217 isoform X2 [Oryza sativa Japonica Group]
Os03g0742800	0.954699	-0.0343991	Cellular Component: ER to Golgi transport vesicle membrane (GO:0012507);; Biological Process: protein transport (GO:0015031);; Biological Process: intracellular transport (GO:0046907);; Molecular Function: transition metal ion binding (GO:0046914);;	--	--	protein transport protein sec23-1 isoform X2 [Oryza sativa Japonica Group]
Os06g0114600	0.589126	0.440159	--	K18735|0|osa:4339915|protein SMG9	--	protein SMG9 [Oryza sativa Japonica Group]
Os04g0562100	1.78e-08	-3.1469	--	--	--	lysine histidine transporter-like 8 [Oryza sativa Japonica Group]
Os02g0731800	0.332541	0.903818	Cellular Component: cell part (GO:0044464);; Molecular Function: transition metal ion binding (GO:0046914);;	--	--	zinc finger protein CONSTANS-LIKE 16 [Oryza sativa Japonica Group]
Os02g0179900	0.551898	0.386646	--	K12842|1.39652e-148|osa:4328504|U2 snRNP-associated SURP motif-containing protein isoform X1	Spliceosome (ko03040)	RNA recognition motif (RRM)-containing protein-like [Oryza sativa Japonica Group]
Os06g0133200	4.27e-07	-2.48691	--	--	--	uncharacterized protein LOC9269221 [Oryza sativa Japonica Group]
Os04g0541900	0.116846	-0.723702	Cellular Component: intrinsic component of membrane (GO:0031224);;	--	--	uncharacterized membrane protein At1g16860 [Oryza sativa Japonica Group]
Os04g0229100	0.0185911	-2.79409	Biological Process: phenylpropanoid biosynthetic process (GO:0009699);; Molecular Function: oxidoreductase activity, acting on the CH-OH group of donors, NAD or NADP as acceptor (GO:0016616);; Molecular Function: transition metal ion binding (GO:0046914);;	K00083|0|osa:4335223|probable cinnamyl alcohol dehydrogenase 6	Phenylpropanoid biosynthesis (ko00940)	hypothetical protein OsI_14481 [Oryza sativa Indica Group]
Os06g0490000	0.804921	0.300775	--	K14191|3.71018e-36|osa:4341079|uncharacterized protein LOC4341079	--	uncharacterized protein LOC4341079 [Oryza sativa Japonica Group]
Os06g0238300	0.603211	0.259971	--	--	--	protein CREG1 [Oryza sativa Japonica Group]
Os10g0561500	0.704744	0.341952	--	--	--	U-box domain-containing protein 35 [Oryza sativa Japonica Group]
Os05g0129300	0.153343	1.4663	Molecular Function: nucleic acid binding transcription factor activity (GO:0001071);; Molecular Function: DNA binding (GO:0003677);; Biological Process: transcription, DNA-templated (GO:0006351);; Cellular Component: intracellular membrane-bounded organelle (GO:0043231);;	--	--	ocs element-binding factor 1 [Oryza sativa Japonica Group]
Os12g0621000	0.000274023	1.22451	Molecular Function: ubiquitin-like protein-specific protease activity (GO:0019783);; Biological Process: modification-dependent protein catabolic process (GO:0019941);; Biological Process: protein modification by small protein removal (GO:0070646);;	--	--	hypothetical protein OsJ_36905 [Oryza sativa Japonica Group]
Os03g0676300	0.00054459	1.7091	--	--	--	ATP-dependent RNA helicase A [Oryza sativa Japonica Group]
Os07g0500300	0.000545108	-1.8633	--	--	--	GTPase activating protein 1-like [Oryza sativa Japonica Group]
Os01g0894000	0.180431	-0.859317	Molecular Function: catalytic activity (GO:0003824);; Cellular Component: intrinsic component of membrane (GO:0031224);;	--	--	putative metallophosphoesterase At3g03305 [Oryza sativa Japonica Group]
Os05g0569300	2.2e-05	2.39715	Molecular Function: nucleic acid binding transcription factor activity (GO:0001071);; Molecular Function: DNA binding (GO:0003677);; Biological Process: transcription, DNA-templated (GO:0006351);;	K09060|0|osa:4339653|common plant regulatory factor 1	--	common plant regulatory factor 1 [Oryza sativa Japonica Group]
Os05g0584600	4.28e-06	-1.83932	--	--	--	hypothetical protein OsI_21164 [Oryza sativa Indica Group]
Os04g0499300	0.353605	0.670279	Biological Process: pyrimidine nucleotide metabolic process (GO:0006220);; Biological Process: translation (GO:0006412);; Biological Process: Notch signaling pathway (GO:0007219);; Molecular Function: translation factor activity, RNA binding (GO:0008135);; Cellular Component: protein complex (GO:0043234);; Biological Process: transport of virus in multicellular host (GO:0046739);; Biological Proc…	--	--	Os04g0499300, partial [Oryza sativa Japonica Group]
Os02g0721600	0.876499	-0.101936	Cellular Component: intracellular membrane-bounded organelle (GO:0043231);;	--	--	WD-40 repeat protein-like [Oryza sativa Japonica Group]
Os05g0585500	0.0930998	1.79932	--	--	--	RecName: Full=Calcium-dependent protein kinase 15; Short=OsCDPK15; Short=OsCPK15
Os09g0109800	0.560796	-0.410553	Biological Process: transport (GO:0006810);; Cellular Component: intrinsic component of membrane (GO:0031224);; Cellular Component: intracellular membrane-bounded organelle (GO:0043231);;	--	--	Os09g0109800 [Oryza sativa Japonica Group]
Os01g0727800	0.823564	-0.20384	Molecular Function: endopeptidase activity (GO:0004175);; Biological Process: protein metabolic process (GO:0019538);;	--	--	subtilisin-like protease SBT5.6 [Oryza sativa Japonica Group]
Os05g0161500	0.000650852	-2.3818	--	K00951|0|osa:4337890|probable GTP diphosphokinase CRSH2, chloroplastic	Purine metabolism (ko00230)	probable GTP diphosphokinase CRSH2, chloroplastic [Oryza sativa Japonica Group]
Os06g0134050	0.607777	-0.236708	Biological Process: RNA splicing, via endonucleolytic cleavage and ligation (GO:0000394);; Molecular Function: transferase activity (GO:0016740);;	K10669|3.41279e-153|osa:9267091|tRNA 2'-phosphotransferase 1	--	tRNA 2&apos;-phosphotransferase 1 [Oryza sativa Japonica Group]
Os12g0407100	0.519632	-0.421643	--	--	--	Os12g0407100 [Oryza sativa Japonica Group]
Os01g0357800	0.711264	-0.36817	Cellular Component: intrinsic component of membrane (GO:0031224);;	--	--	putative pentatricopeptide repeat-containing protein At3g01580 [Oryza sativa Japonica Group]
Os11g0131100	0.91175	0.919983	Cellular Component: intracellular membrane-bounded organelle (GO:0043231);;	--	--	calmodulin-binding protein 25 [Oryza sativa Japonica Group]
Os03g0592500	0.314755	-1.08451	--	K08913|0|osa:4333359|chlorophyll a-b binding protein, chloroplastic	Photosynthesis - antenna proteins (ko00196)	chlorophyll a-b binding protein, chloroplastic [Oryza sativa Japonica Group]
Os10g0125300	0.941993	0.0772481	--	--	--	Unknown protein [Oryza sativa Japonica Group]
Os05g0147500	0.961341	0.0437224	Molecular Function: endopeptidase activity (GO:0004175);; Biological Process: macromolecule catabolic process (GO:0009057);; Cellular Component: plastid envelope (GO:0009526);; Cellular Component: plastid stroma (GO:0009532);; Cellular Component: chloroplast thylakoid (GO:0009534);; Biological Process: plastid organization (GO:0009657);; Biological Process: photosynthesis, light harvesting (GO:00…	--	--	protease Do-like 2, chloroplastic isoform X1 [Oryza sativa Japonica Group]
Os07g0569700	0.0304445	-0.70321	Molecular Function: transition metal ion binding (GO:0046914);;	--	--	zinc finger AN1 and C2H2 domain-containing stress-associated protein 16 [Oryza sativa Japonica Group]
Os02g0241200	0.00495348	-1.60039	Molecular Function: nucleic acid binding (GO:0003676);; Biological Process: transcription, DNA-templated (GO:0006351);; Cellular Component: intracellular membrane-bounded organelle (GO:0043231);;	--	--	uncharacterized protein LOC107275964 [Oryza sativa Japonica Group]
Os10g0389000	0.192981	1.07093	Cellular Component: intrinsic component of membrane (GO:0031224);; Molecular Function: metal ion binding (GO:0046872);;	K13448|1.48477e-122|osa:4348517|probable calcium-binding protein CML8	Plant-pathogen interaction (ko04626)	probable calcium-binding protein CML8 [Oryza sativa Japonica Group]
Os03g0249900	0.465994	0.515334	--	--	--	nucleolin [Oryza sativa Japonica Group]
Os06g0647400	0.445722	0.404488	--	K01285|0|osa:4341667|lysosomal Pro-X carboxypeptidase	--	lysosomal Pro-X carboxypeptidase [Oryza sativa Japonica Group]
Os11g0105400	0.186054	0.863239	--	K14815|1.63355e-169|osa:4349548|mRNA turnover protein 4 homolog isoform X1	--	mRNA turnover protein 4 homolog isoform X1 [Oryza sativa Japonica Group]
Os03g0250000	0.441344	0.50811	Molecular Function: metal ion binding (GO:0046872);;	--	--	39 kDa EF-Hand containing protein, putative, expressed [Oryza sativa Japonica Group]
Os07g0100500	0.257972	-0.700363	--	--	--	unknown protein [Oryza sativa Japonica Group]
Os04g0598000	0.891833	0.0981079	--	--	--	late embryogenesis abundant protein At5g17165 [Oryza sativa Japonica Group]
Os03g0111100	0.0775547	-1.08011	Biological Process: folic acid-containing compound biosynthetic process (GO:0009396);; Molecular Function: acid-amino acid ligase activity (GO:0016881);; Molecular Function: purine ribonucleoside binding (GO:0032550);; Cellular Component: intracellular membrane-bounded organelle (GO:0043231);;	K01930|0|osa:4331360|folylpolyglutamate synthase isoform X1	Folate biosynthesis (ko00790);; Biosynthesis of cofactors (ko01240)	hypothetical protein OsJ_09133 [Oryza sativa Japonica Group]
Os03g0742900	0.930956	0.0763386	Biological Process: transcription, DNA-templated (GO:0006351);; Biological Process: hormone-mediated signaling pathway (GO:0009755);; Cellular Component: intracellular membrane-bounded organelle (GO:0043231);;	K14484|1.47107e-89|osa:4334069|auxin-responsive protein IAA13	Plant hormone signal transduction (ko04075)	auxin-responsive protein IAA13 [Oryza sativa Japonica Group]
Os01g0541900	0.0472698	-0.662116	--	--	--	RecName: Full=Protein kinase and PP2C-like domain-containing protein; Includes: RecName: Full=Probable serine/threonine-protein kinase Os01g0541900; Includes: RecName: Full=Probable protein phosphatase 2C 4; Short=OsPP2C04
Os03g0742850	0.437157	0.472793	Cellular Component: ER to Golgi transport vesicle membrane (GO:0012507);; Biological Process: protein transport (GO:0015031);; Biological Process: intracellular transport (GO:0046907);; Molecular Function: transition metal ion binding (GO:0046914);;	--	--	protein transport protein sec23-1 isoform X2 [Oryza sativa Japonica Group]
Os11g0130100	0.754731	-0.164374	Cellular Component: intracellular membrane-bounded organelle (GO:0043231);;	K15559|0|osa:4349670|regulation of nuclear pre-mRNA domain-containing protein 2	--	Os11g0130100, partial [Oryza sativa Japonica Group]
Os08g0263300	0.700744	-0.168793	--	--	--	Os08g0263300, partial [Oryza sativa Japonica Group]
Os11g0120100	0.811642	0.240101	Cellular Component: intrinsic component of membrane (GO:0031224);; Cellular Component: intracellular membrane-bounded organelle (GO:0043231);;	--	--	Os11g0120000, partial [Oryza sativa Japonica Group]
Os02g0829100	0.954303	-0.0669725	Molecular Function: nucleic acid binding (GO:0003676);; Biological Process: DNA metabolic process (GO:0006259);; Biological Process: cellular response to stress (GO:0033554);; Cellular Component: intracellular membrane-bounded organelle (GO:0043231);;	K10739|0|osa:4331236|replication protein A 32 kDa subunit A	DNA replication (ko03030);; Nucleotide excision repair (ko03420);; Mismatch repair (ko03430);; Homologous recombination (ko03440)	replication protein A 32 kDa subunit A [Oryza sativa Japonica Group]
Os08g0206950	0.668638	0.466899	Biological Process: polysaccharide catabolic process (GO:0000272);; Molecular Function: structural molecule activity (GO:0005198);; Biological Process: gene expression (GO:0010467);; Cellular Component: external encapsulating structure (GO:0030312);; Cellular Component: intracellular ribonucleoprotein complex (GO:0030529);; Molecular Function: carboxylic ester hydrolase activity (GO:0052689);; Bi…	--	--	probable pectinesterase 8 [Oryza sativa Japonica Group]
Os02g0173800	0.369313	1.06694	--	--	--	ALA-interacting subunit 1 [Oryza sativa Japonica Group]
Os06g0134900	0.134144	1.29313	--	--	--	uncharacterized protein LOC4340034 [Oryza sativa Japonica Group]
Os10g0112100	0.0258944	-1.6478	--	--	--	cell number regulator 10 [Oryza sativa Japonica Group]
Os02g0689500	0.278671	-0.580482	--	--	--	serine/arginine repetitive matrix protein 1 [Oryza sativa Japonica Group]
Os02g0281200	0.245458	-0.768169	Molecular Function: purine ribonucleoside binding (GO:0032550);;	--	--	disease resistance protein RGA2 isoform X2 [Oryza sativa Japonica Group]
Os07g0162100	0.0741288	-1.09736	--	--	--	3-oxo-5-alpha-steroid 4-dehydrogenase 2 [Oryza sativa Japonica Group]
Os05g0355400	2.14e-09	5.25537	Biological Process: response to stimulus (GO:0050896);;	--	--	Os05g0355400 [Oryza sativa Japonica Group]
Os07g0113200	0.816106	0.175847	Cellular Component: intrinsic component of membrane (GO:0031224);; Cellular Component: intracellular membrane-bounded organelle (GO:0043231);;	--	--	uncharacterized protein LOC4342242 [Oryza sativa Japonica Group]
Os01g0930400	0.999705	-0.00158692	Cellular Component: intrinsic component of membrane (GO:0031224);; Molecular Function: metal ion transmembrane transporter activity (GO:0046873);; Biological Process: cellular potassium ion transport (GO:0071804);;	K03549|0|osa:4326945|potassium transporter 5	--	potassium transporter 5 [Oryza sativa Japonica Group]
Os07g0163000	0.820169	0.198313	--	K00102|0|osa:9270233|D-lactate dehydrogenase [cytochrome], mitochondrial	Pyruvate metabolism (ko00620)	D-lactate dehydrogenase [cytochrome], mitochondrial [Oryza sativa Japonica Group]
Os07g0102400	0.0788967	-0.680868	--	--	--	hypothetical protein OsI_24576 [Oryza sativa Indica Group]
Os07g0438700	0.195307	1.73372	--	--	--	TLD domain-containing protein 2 isoform X1 [Oryza sativa Japonica Group]
Os07g0633500	0.637575	0.286439	--	K14778|0|osa:4344011|DEAD-box ATP-dependent RNA helicase 36	--	DEAD-box ATP-dependent RNA helicase 36 [Oryza sativa Japonica Group]
Os07g0655500	0.694749	0.252749	--	--	--	protein HUA2-LIKE 3 [Oryza sativa Japonica Group]
Os02g0697550	0.731154	-0.393978	--	--	--	pentatricopeptide repeat-containing protein At1g31920 [Oryza sativa Japonica Group]
Os10g0112700	0.171146	-0.75468	--	--	--	Os10g0112700, partial [Oryza sativa Japonica Group]
Os05g0498400	0.877944	0.158061	Biological Process: translation (GO:0006412);; Molecular Function: translation factor activity, RNA binding (GO:0008135);;	K03113|2.83048e-74|osa:4339216|protein translation factor SUI1 homolog	RNA transport (ko03013)	hypothetical protein OsI_20483 [Oryza sativa Indica Group]
Os10g0439924	0.712677	-0.377983	--	--	--	ent-isokaurene C2/C3-hydroxylase-like [Oryza sativa Japonica Group]
Os04g0430100	0.00169367	1.56468	--	K02947|2.62069e-62|osa:4335865|40S ribosomal protein S10	Ribosome (ko03010)	hypothetical protein EJB05_37967, partial [Eragrostis curvula]
Os03g0329900	0.830839	-0.105268	--	--	--	protein PHOSPHATE STARVATION RESPONSE 1 [Oryza sativa Japonica Group]
Os10g0466200	0.510441	0.98275	--	K02867|8.57242e-95|osa:4348843|54S ribosomal protein L19, mitochondrial	Ribosome (ko03010)	54S ribosomal protein L19, mitochondrial [Oryza sativa Japonica Group]
Os01g0923700	0.0247668	1.10601	Molecular Function: protein histidine kinase activity (GO:0004673);; Biological Process: protein phosphorylation (GO:0006468);; Biological Process: iron ion transport (GO:0006826);; Biological Process: cellular response to starvation (GO:0009267);; Biological Process: response to cold (GO:0009409);; Biological Process: response to bacterium (GO:0009617);; Biological Process: response to abscisic …	K14489|0|osa:9271913|probable histidine kinase 3	Plant hormone signal transduction (ko04075)	probable histidine kinase 3 [Oryza sativa Japonica Group]
Os07g0633800	0.695991	-0.370357	Biological Process: reproductive shoot system development (GO:0090567);;	--	--	anaphase-promoting complex subunit 13 isoform X2 [Oryza sativa Japonica Group]
Os03g0165100	0.709555	0.324802	Molecular Function: catalytic activity (GO:0003824);;	--	--	Os03g0165100 [Oryza sativa Japonica Group]
Os01g0622700	0.399388	0.491428	--	--	--	probable protein ABIL1 [Oryza sativa Japonica Group]
Os06g0115800	0.200043	0.592233	--	--	--	Os06g0115800, partial [Oryza sativa Japonica Group]
Os10g0559900	0.604905	0.433534	--	--	--	uncharacterized protein LOC4349373 [Oryza sativa Japonica Group]
Os07g0210000	0.0834576	-1.27379	Biological Process: vesicle-mediated transport (GO:0016192);; Cellular Component: protein complex (GO:0043234);;	--	--	exocyst complex component EXO70B1 isoform X1 [Oryza sativa Japonica Group]
Os02g0241600	0.204497	0.566398	Molecular Function: protein kinase activity (GO:0004672);; Biological Process: cellular protein modification process (GO:0006464);; Biological Process: phosphate-containing compound metabolic process (GO:0006796);; Molecular Function: purine ribonucleoside binding (GO:0032550);;	--	--	serine/threonine-protein kinase EDR1 isoform X1 [Oryza sativa Japonica Group]
Os06g0326700	0.0556108	2.18955	--	K22848|0|osa:4340911|diacylglycerol O-acyltransferase 2	Glycerolipid metabolism (ko00561)	diacylglycerol O-acyltransferase 2D [Oryza sativa Japonica Group]
Os11g0105800	0.476119	-0.94314	Biological Process: phosphate-containing compound metabolic process (GO:0006796);; Molecular Function: transferase activity, transferring phosphorus-containing groups (GO:0016772);; Cellular Component: intrinsic component of membrane (GO:0031224);;	K15892|0|osa:4349551|probable phytol kinase 2, chloroplastic	Terpenoid backbone biosynthesis (ko00900)	probable phytol kinase 2, chloroplastic [Oryza sativa Japonica Group]
Os01g0625200	0.899419	-0.185392	--	--	--	Os01g0625200, partial [Oryza sativa Japonica Group]
Os11g0261600	0.00460202	4.53709	--	--	--	Os11g0261600, partial [Oryza sativa Japonica Group]
Os03g0109700	0.305989	-0.855396	--	--	--	uncharacterized protein LOC4331348 [Oryza sativa Japonica Group]
Os05g0499500	0.691997	-0.213009	Cellular Component: intrinsic component of membrane (GO:0031224);; Cellular Component: intracellular membrane-bounded organelle (GO:0043231);;	--	--	traB domain-containing protein [Oryza sativa Japonica Group]
Os02g0241100	0.0631505	1.02375	Biological Process: cellular protein modification process (GO:0006464);; Biological Process: phosphate-containing compound metabolic process (GO:0006796);; Molecular Function: kinase activity (GO:0016301);; Cellular Component: intrinsic component of membrane (GO:0031224);; Molecular Function: purine ribonucleoside binding (GO:0032550);;	--	--	calmodulin-binding receptor kinase CaMRLK [Oryza sativa Japonica Group]
Os06g0702400	0.734225	-0.27608	Biological Process: cellular protein modification process (GO:0006464);; Molecular Function: kinase activity (GO:0016301);;	--	--	uncharacterized protein LOC4341976 [Oryza sativa Japonica Group]
Os01g0930200	0.941269	0.088068	--	--	--	uncharacterized protein LOC4326943 [Oryza sativa Japonica Group]
Os01g0272800	0.622135	0.47783	Cellular Component: intracellular membrane-bounded organelle (GO:0043231);;	--	--	Os01g0272800, partial [Oryza sativa Japonica Group]
Os02g0226300	0.0978923	1.87527	--	--	--	Os02g0226300 [Oryza sativa Japonica Group]
Os03g0678400	0.356407	0.777817	Cellular Component: intrinsic component of membrane (GO:0031224);; Molecular Function: transition metal ion binding (GO:0046914);;	K10666|1.20465e-126|osa:4333714|E3 ubiquitin-protein ligase RNF5	Protein processing in endoplasmic reticulum (ko04141)	hypothetical protein OsI_12994 [Oryza sativa Indica Group]
Os06g0553001	4.1e-08	4.89272	Molecular Function: nucleic acid binding transcription factor activity (GO:0001071);; Molecular Function: DNA binding (GO:0003677);; Biological Process: transcription, DNA-templated (GO:0006351);; Cellular Component: intracellular membrane-bounded organelle (GO:0043231);;	K09419|1.4911e-74|osa:4341273|heat stress transcription factor C-2b	--	heat stress transcription factor C-2b [Oryza sativa Japonica Group]
Os02g0324300	0.660229	0.226103	--	K13115|0|osa:4329178|coiled-coil domain-containing protein 130	--	coiled-coil domain-containing protein 130 [Oryza sativa Japonica Group]
Os07g0671800	0.985134	-0.0124743	Cellular Component: intrinsic component of membrane (GO:0031224);;	--	--	Os07g0671800, partial [Oryza sativa Japonica Group]
Os03g0769050	0.392073	0.625658	Cellular Component: intrinsic component of membrane (GO:0031224);; Cellular Component: intracellular membrane-bounded organelle (GO:0043231);;	--	--	Os03g0769050 [Oryza sativa Japonica Group]
Os06g0297800	0.460202	0.703415	--	--	--	Os06g0297800, partial [Oryza sativa Japonica Group]
Os07g0162500	0.349892	0.359606	--	--	--	probable carboxylesterase 15 [Oryza sativa Japonica Group]
Os02g0723700	0.914575	0.0589603	--	--	--	Os02g0723700, partial [Oryza sativa Japonica Group]
Os05g0130600	0.223752	0.802709	--	--	--	uncharacterized protein LOC9266485 [Oryza sativa Japonica Group]
Os05g0128100	0.771496	0.287259	Cellular Component: intrinsic component of membrane (GO:0031224);; Cellular Component: intracellular membrane-bounded organelle (GO:0043231);;	--	--	unknown protein [Oryza sativa Japonica Group]
Os02g0699600	4.17e-05	1.51282	--	K02870|1.64018e-110|osa:4330425|60S ribosomal protein L12-1	Ribosome (ko03010)	60S ribosomal protein L12-1 [Oryza sativa Japonica Group]
Os11g0129600	0.165565	-0.770374	--	K23538|2.4447e-174|osa:4349666|ELMO domain-containing protein C	--	ELMO domain-containing protein C [Oryza sativa Japonica Group]
Os10g0469100	0.730922	-0.427651	--	--	--	probable leucine-rich repeat receptor-like protein kinase At1g35710 [Oryza sativa Japonica Group]
Os02g0731900	0.980757	0.0189253	Biological Process: fatty acid metabolic process (GO:0006631);; Molecular Function: transferase activity, transferring acyl groups (GO:0016746);; Cellular Component: intrinsic component of membrane (GO:0031224);;	--	--	Os02g0731900, partial [Oryza sativa Japonica Group]
Os04g0432200	0.982487	-0.0145053	Molecular Function: nucleoside-triphosphatase activity (GO:0017111);; Molecular Function: purine ribonucleoside binding (GO:0032550);; Cellular Component: intracellular membrane-bounded organelle (GO:0043231);;	K18995|3.11966e-52|osa:9267691|DExH-box ATP-dependent RNA helicase DExH7, chloroplastic isoform X1	--	hypothetical protein OsJ_14858 [Oryza sativa Japonica Group]
Os01g0897100	0.96624	-0.0317847	--	--	--	uncharacterized protein LOC4325102 [Oryza sativa Japonica Group]
Os04g0430200	3.82e-10	2.14672	Molecular Function: protein kinase activity (GO:0004672);; Biological Process: cellular protein modification process (GO:0006464);; Cellular Component: intrinsic component of membrane (GO:0031224);; Molecular Function: purine ribonucleoside binding (GO:0032550);; Molecular Function: phosphoric ester hydrolase activity (GO:0042578);;	--	--	PI-PLC X domain-containing protein At5g67130 [Oryza sativa Japonica Group]
Os08g0206900	0.778891	0.2203	--	K00972|0|osa:4344934|UDP-N-acetylglucosamine diphosphorylase 1	Amino sugar and nucleotide sugar metabolism (ko00520)	UDP-N-acetylglucosamine diphosphorylase 1 [Oryza sativa Japonica Group]
Os01g0388500	0.743509	-0.147892	--	K22128|0|osa:9271287|piezo-type mechanosensitive ion channel homolog isoform X1	--	piezo-type mechanosensitive ion channel homolog isoform X3 [Oryza sativa Japonica Group]
Os06g0491300	0.449898	-0.654608	--	--	--	hypothetical protein OsI_23048 [Oryza sativa Indica Group]
Os06g0133800	0.0984283	-1.17328	Cellular Component: chloroplast thylakoid (GO:0009534);; Biological Process: carbon fixation (GO:0015977);; Molecular Function: transferase activity, transferring aldehyde or ketonic groups (GO:0016744);; Molecular Function: cation binding (GO:0043169);;	K00615|0|osa:4340025|transketolase, chloroplastic	Pentose phosphate pathway (ko00030);; Carbon fixation in photosynthetic organisms (ko00710);; Carbon metabolism (ko01200);; Biosynthesis of amino acids (ko01230)	transketolase, chloroplastic [Oryza sativa Japonica Group]
Os07g0162400	0.0327118	1.37158	--	--	--	probable carboxylesterase 15 [Oryza sativa Japonica Group]
Os06g0494250	0.997896	0.0070096	--	--	--	hypothetical protein OsJ_21426 [Oryza sativa Japonica Group]
Os10g0430800	0.389797	-0.442363	Cellular Component: membrane (GO:0016020);; Cellular Component: intracellular membrane-bounded organelle (GO:0043231);;	--	--	Os10g0430800, partial [Oryza sativa Japonica Group]
Os09g0115466	0.017937	1.96005	Molecular Function: nucleic acid binding (GO:0003676);; Molecular Function: small molecule binding (GO:0036094);; Cellular Component: intracellular part (GO:0044424);;	K13126|0|osa:4346409|polyadenylate-binding protein 2	RNA transport (ko03013);; mRNA surveillance pathway (ko03015);; RNA degradation (ko03018)	polyadenylate-binding protein 2 [Oryza sativa Japonica Group]
Os10g0442600	0.68976	0.33298	Molecular Function: catalytic activity (GO:0003824);; Molecular Function: purine ribonucleoside binding (GO:0032550);; Biological Process: single-organism cellular process (GO:0044763);;	--	--	Os10g0442600, partial [Oryza sativa Japonica Group]
Os12g0206700	0.786985	-0.212883	Cellular Component: intrinsic component of membrane (GO:0031224);;	--	--	Os12g0206700, partial [Oryza sativa Japonica Group]
Os12g0104200	0.947836	-0.04703	--	--	--	Os12g0104200, partial [Oryza sativa Japonica Group]
Os07g0671901	0.993564	0.00582829	Cellular Component: intrinsic component of membrane (GO:0031224);;	--	--	REF/SRPP-like protein At3g05500 [Oryza sativa Japonica Group]
Os04g0501100	0.660619	-0.405108	--	K16075|0|osa:4336308|magnesium transporter MRS2-C	--	magnesium transporter MRS2-C [Oryza sativa Japonica Group]
Os05g0374200	8.86e-05	-3.81181	Molecular Function: nucleotide binding (GO:0000166);; Biological Process: cellular aromatic compound metabolic process (GO:0006725);; Molecular Function: oxidoreductase activity, acting on the CH-NH group of donors (GO:0016645);; Cellular Component: extracellular region part (GO:0044421);; Biological Process: single-organism metabolic process (GO:0044710);;	K00279|0|osa:4338605|cytokinin dehydrogenase 9	Zeatin biosynthesis (ko00908)	cytokinin dehydrogenase 9 [Oryza sativa Japonica Group]
Os04g0584300	0.66114	0.717314	Molecular Function: phosphoprotein phosphatase activity (GO:0004721);; Biological Process: cellular protein modification process (GO:0006464);; Molecular Function: cation binding (GO:0043169);; Cellular Component: intracellular membrane-bounded organelle (GO:0043231);;	K01102|2.67251e-180|osa:9272700|probable protein phosphatase 2C 43	--	probable protein phosphatase 2C 43 [Oryza sativa Japonica Group]
Os01g0923000	0.234259	1.52713	Cellular Component: intrinsic component of membrane (GO:0031224);;	--	--	uncharacterized protein LOC4327248 [Oryza sativa Japonica Group]
Os02g0324200	0.97732	-0.0339437	--	--	--	hypothetical protein OsI_06993 [Oryza sativa Indica Group]
Os05g0127400	0.108887	2.29821	Molecular Function: protein binding (GO:0005515);; Biological Process: cellular process (GO:0009987);;	K09510|2.19647e-130|osa:9268635|dnaJ homolog subfamily B member 1	--	hypothetical protein EE612_026832 [Oryza sativa]
Os12g0620600	0.487313	0.691667	Cellular Component: intracellular membrane-bounded organelle (GO:0043231);;	--	--	uncharacterized protein LOC4352816 isoform X1 [Oryza sativa Japonica Group]
Os01g0848400	0.623664	-0.426268	Molecular Function: nucleic acid binding transcription factor activity (GO:0001071);; Molecular Function: nucleic acid binding (GO:0003676);; Biological Process: transcription, DNA-templated (GO:0006351);; Cellular Component: intracellular membrane-bounded organelle (GO:0043231);;	--	--	qSH-1 [Oryza sativa Indica Group]
Os05g0160300	0.500497	1.2875	--	--	--	hypothetical protein EE612_027269 [Oryza sativa]
Os12g0460100	0.00289986	2.16633	Cellular Component: intrinsic component of membrane (GO:0031224);;	--	--	uncharacterized protein LOC9269225 [Oryza sativa Japonica Group]
Os08g0305000	0.650447	-0.241534	Biological Process: pentose-phosphate shunt (GO:0006098);; Molecular Function: intramolecular oxidoreductase activity, interconverting aldoses and ketoses (GO:0016861);; Cellular Component: intrinsic component of membrane (GO:0031224);; Cellular Component: intracellular membrane-bounded organelle (GO:0043231);;	--	--	Os08g0305000, partial [Oryza sativa Japonica Group]
Os06g0325500	0.582343	0.304253	Biological Process: phosphate-containing compound metabolic process (GO:0006796);; Molecular Function: transferase activity, transferring phosphorus-containing groups (GO:0016772);; Cellular Component: intrinsic component of membrane (GO:0031224);;	--	--	uncharacterized protein At2g17340 [Oryza sativa Japonica Group]
Os01g0818000	0.953035	-0.0334825	Biological Process: transport (GO:0006810);; Cellular Component: intrinsic component of membrane (GO:0031224);;	K24139|0|osa:4327495|uncharacterized protein LOC4327495	--	protein PIN-LIKES 6 [Oryza sativa Japonica Group]
Os01g0383900	0.552059	0.341795	--	K14297|0|osa:4325429|nuclear pore complex protein NUP98A	RNA transport (ko03013)	hypothetical protein OsJ_01873 [Oryza sativa Japonica Group]
Os04g0563100	0.991496	0.0111323	--	--	--	protein LAZ1 [Oryza sativa Japonica Group]
Os07g0102000	0.733866	-0.304995	--	--	--	Os07g0102000, partial [Oryza sativa Japonica Group]
Os01g0214800	0.143158	-1.16566	Molecular Function: hydrolase activity (GO:0016787);; Cellular Component: intrinsic component of membrane (GO:0031224);;	--	--	Os01g0214800 [Oryza sativa Japonica Group]
Os07g0113500	0.790989	0.339751	Biological Process: RNA modification (GO:0009451);; Cellular Component: plastid (GO:0009536);; Molecular Function: transition metal ion binding (GO:0046914);;	--	--	pentatricopeptide repeat-containing protein ELI1, chloroplastic [Oryza sativa Japonica Group]
Os07g0100800	0.104804	-1.10813	--	--	--	Os07g0100800, partial [Oryza sativa Japonica Group]
Os05g0501600	0.551317	0.443297	Cellular Component: intracellular membrane-bounded organelle (GO:0043231);;	--	--	uncharacterized protein LOC4339238 isoform X1 [Oryza sativa Japonica Group]
Os02g0830000	0.254575	1.11893	--	--	--	pentatricopeptide repeat-containing protein At3g62890 [Oryza sativa Japonica Group]
Os12g0205500	0.719594	-0.264677	Cellular Component: intrinsic component of membrane (GO:0031224);; Molecular Function: purine ribonucleoside binding (GO:0032550);;	--	--	probable disease resistance protein At1g61300 [Oryza sativa Japonica Group]
Os05g0500500	0.153825	-1.20769	Cellular Component: intracellular membrane-bounded organelle (GO:0043231);;	--	--	22.3 kDa class VI heat shock protein [Oryza sativa Japonica Group]
Os04g0300600	0.0608487	-1.05946	Molecular Function: protein binding (GO:0005515);; Cellular Component: intracellular membrane-bounded organelle (GO:0043231);;	--	--	Os04g0300600 [Oryza sativa Japonica Group]
Os05g0158700	0.812982	-0.180823	Molecular Function: catalytic activity (GO:0003824);; Biological Process: diterpenoid metabolic process (GO:0016101);; Molecular Function: transition metal ion binding (GO:0046914);;	K04125|5.50842e-86|osa:4337874|gibberellin 2-beta-dioxygenase 2	Diterpenoid biosynthesis (ko00904)	gibberellin oxidase, partial [Oryza sativa Japonica Group]
Os10g0178500	0.984315	0.014681	--	K13496|0|osa:4348200|UDP-glycosyltransferase 73C1	Zeatin biosynthesis (ko00908)	UDP-glycosyltransferase 73C1 [Oryza sativa Japonica Group]
Os12g0106100	0.854016	-0.147256	--	--	--	Os12g0106100 [Oryza sativa Japonica Group]
Os02g0179800	0.733866	0.305311	--	K08330|0|osa:4328503|autophagy-related protein 11	Autophagy - other (ko04136)	autophagy-related protein 11 [Oryza sativa Japonica Group]
Os06g0115100	0.236288	0.911735	--	--	--	uncharacterized protein LOC4339919 [Oryza sativa Japonica Group]
Os10g0467000	0.000545793	-1.37125	--	--	--	uncharacterized protein LOC4348848 [Oryza sativa Japonica Group]
Os05g0158500	0.910971	-0.0768425	Molecular Function: carboxypeptidase activity (GO:0004180);; Biological Process: proteolysis (GO:0006508);;	K16297|0|osa:4337873|serine carboxypeptidase-like 33 isoform X2	--	serine carboxypeptidase-like 26 [Oryza sativa Japonica Group]
Os11g0120300	0.940879	-0.0706573	--	--	--	protein LURP-one-related 8 [Oryza sativa Japonica Group]
Os01g0388200	0.0644431	1.7394	--	--	--	Os01g0388200, partial [Oryza sativa Japonica Group]
Os11g0130200	0.0983662	-1.42776	Cellular Component: intracellular membrane-bounded organelle (GO:0043231);;	--	--	uncharacterized protein LOC4349671 [Oryza sativa Japonica Group]
Os05g0550800	0.000390987	4.82845	--	--	--	LEAF RUST 10 DISEASE-RESISTANCE LOCUS RECEPTOR-LIKE PROTEIN KINASE-like 1.2 isoform X1 [Oryza sativa Japonica Group]
Os01g0894500	0.941993	-0.0464639	--	--	--	selenoprotein F [Oryza sativa Japonica Group]
Os10g0469300	0.851059	-0.21566	Cellular Component: intrinsic component of membrane (GO:0031224);;	--	--	probable leucine-rich repeat receptor-like protein kinase At1g35710 [Oryza sativa Japonica Group]
Os04g0301500	0.715509	-1.64604	Molecular Function: protein binding (GO:0005515);; Cellular Component: intracellular membrane-bounded organelle (GO:0043231);;	--	--	hypothetical protein EE612_022967 [Oryza sativa]
Os02g0699800	0.602881	0.599175	--	--	--	Os02g0699800, partial [Oryza sativa Japonica Group]
Os03g0329700	0.191657	-0.801672	--	--	--	probable leucine-rich repeat receptor-like protein kinase At5g49770 [Oryza sativa Japonica Group]
Os01g0542100	0.047815	-1.02264	--	--	--	hypothetical protein [Oryza sativa Japonica Group]
Os01g0591300	0.0526539	-1.20586	--	K12355|0|osa:4326376|aldehyde dehydrogenase family 2 member C4	Phenylpropanoid biosynthesis (ko00940)	aldehyde dehydrogenase family 2 member C4 [Oryza sativa Japonica Group]
Os04g0583200	0.0140596	3.687	--	--	--	OSJNBa0088A01.13 [Oryza sativa Japonica Group]
Os04g0541700	8.14e-06	3.26993	Molecular Function: nucleic acid binding transcription factor activity (GO:0001071);; Molecular Function: DNA binding (GO:0003677);; Biological Process: transcription, DNA-templated (GO:0006351);; Cellular Component: intracellular membrane-bounded organelle (GO:0043231);;	--	--	homeobox-leucine zipper protein HOX22 [Oryza sativa Japonica Group]
Os01g0824700	0.934452	0.0707817	--	--	--	uncharacterized protein LOC4327578 [Oryza sativa Japonica Group]
Os08g0508500	0.0683367	-1.42296	--	--	--	Os08g0508500 [Oryza sativa Japonica Group]
Os09g0112400	0.866715	-0.177664	Cellular Component: intracellular membrane-bounded organelle (GO:0043231);;	--	--	protein DCL homolog, chloroplastic [Oryza sativa Japonica Group]
Os02g0690800	0.404672	0.510484	--	K01438|0|osa:4330380|acetylornithine deacetylase	Arginine biosynthesis (ko00220);; 2-Oxocarboxylic acid metabolism (ko01210);; Biosynthesis of amino acids (ko01230)	acetylornithine deacetylase [Oryza sativa Japonica Group]
Os01g0269500	0.046021	1.04033	Biological Process: response to stress (GO:0006950);; Biological Process: programmed cell death (GO:0012501);; Cellular Component: intracellular ribonucleoprotein complex (GO:0030529);; Molecular Function: purine ribonucleoside binding (GO:0032550);;	--	--	hypothetical protein EE612_001689, partial [Oryza sativa]
Os12g0621100	0.42679	-0.53101	Molecular Function: cation binding (GO:0043169);; Cellular Component: intracellular membrane-bounded organelle (GO:0043231);; Biological Process: single-multicellular organism process (GO:0044707);;	--	--	protein YABBY 6 [Oryza sativa Japonica Group]
Os01g0823900	0.0547607	-0.983229	--	--	--	U-box domain-containing protein 16 [Oryza sativa Japonica Group]
Os02g0721000	0.839424	0.204386	--	--	--	Os02g0720900, partial [Oryza sativa Japonica Group]
Os07g0270900	0.249911	0.869548	--	K14831|1.1855e-160|osa:4342894|protein MAK16 homolog A	--	protein MAK16 homolog A [Oryza sativa Japonica Group]
Os01g0896200	0.215785	1.3981	Cellular Component: intracellular membrane-bounded organelle (GO:0043231);;	--	--	Os01g0896200, partial [Oryza sativa Japonica Group]
Os05g0586900	0.761696	0.293059	Molecular Function: transition metal ion binding (GO:0046914);;	--	--	pentatricopeptide repeat-containing protein At4g01030, mitochondrial [Oryza sativa Japonica Group]
Os11g0684700	0.98464	0.0301913	Molecular Function: purine ribonucleoside binding (GO:0032550);;	--	--	disease resistance protein RGA4-like [Oryza sativa Japonica Group]
Os12g0104700	0.905925	0.0732517	--	--	--	protein trichome birefringence-like 28 [Oryza sativa Japonica Group]
Os09g0281800	0.795218	0.262458	--	--	--	uncharacterized protein LOC4346615 [Oryza sativa Japonica Group]
Os04g0499800	0.876226	-0.175612	--	--	--	OSJNBa0029H02.13 [Oryza sativa Japonica Group]
Os02g0282100	0.0885589	1.16646	--	K17434|4.77587e-79|osa:4329028|uncharacterized protein LOC4329028	--	uncharacterized protein LOC4329028 [Oryza sativa Japonica Group]
Os06g0296100	0.0238985	2.55509	--	--	--	Os06g0296100 [Oryza sativa Japonica Group]
Os07g0499800	0.0351625	1.76366	Molecular Function: transferase activity, transferring glycosyl groups (GO:0016757);; Cellular Component: intracellular membrane-bounded organelle (GO:0043231);; Molecular Function: transition metal ion binding (GO:0046914);;	K01931|0|osa:4343310|uncharacterized protein LOC4343310	--	uncharacterized protein LOC4343310 [Oryza sativa Japonica Group]
Os05g0376000	0.767999	-0.260291	Molecular Function: small molecule binding (GO:0036094);; Molecular Function: organic cyclic compound binding (GO:0097159);;	K14411|5.51012e-175|obr:102709078|heterogeneous nuclear ribonucleoprotein A1, A2/B1 homolog	mRNA surveillance pathway (ko03015)	PREDICTED: heterogeneous nuclear ribonucleoprotein A1, A2/B1 homolog isoform X2 [Oryza brachyantha]
Os05g0571600	0.334334	1.0918	--	--	--	uncharacterized protein LOC9272350 [Oryza sativa Japonica Group]
Os11g0132000	0.572386	-0.236225	Molecular Function: hydrolase activity, hydrolyzing O-glycosyl compounds (GO:0004553);; Biological Process: arabinose metabolic process (GO:0019566);;	K01209|1.29538e-124|osa:9268316|alpha-L-arabinofuranosidase 1	Amino sugar and nucleotide sugar metabolism (ko00520)	hypothetical protein OsJ_32827 [Oryza sativa Japonica Group]
Os01g0328600	0.503176	-0.385079	--	--	--	uncharacterized protein LOC4326979 [Oryza sativa Japonica Group]
Os10g0467600	0.327237	0.966617	--	K03259|8.05578e-130|osa:4348852|eukaryotic translation initiation factor isoform 4E-2	RNA transport (ko03013)	eukaryotic translation initiation factor [Oryza sativa Japonica Group]
Os05g0498700	0.82778	-0.106027	--	--	--	B2 protein [Oryza sativa Japonica Group]
Os02g0700500	0.159367	-0.946639	--	--	--	polyamine transporter PUT1 isoform X1 [Oryza sativa Japonica Group]
Os01g0502700	0.677407	-0.298112	--	--	--	Os01g0502700 [Oryza sativa Japonica Group]
Os02g0699300	0.948536	-0.0773125	--	--	--	Os02g0699300 [Oryza sativa Japonica Group]
Os02g0627100	0.829856	-0.413657	Biological Process: L-phenylalanine metabolic process (GO:0006558);; Biological Process: phenylpropanoid biosynthetic process (GO:0009699);; Molecular Function: ammonia-lyase activity (GO:0016841);; Cellular Component: intracellular part (GO:0044424);;	K10775|0|osa:4330040|phenylalanine ammonia-lyase	Phenylalanine metabolism (ko00360);; Phenylpropanoid biosynthesis (ko00940)	phenylalanine ammonia-lyase [Oryza sativa Japonica Group]
Os02g0179300	0.513521	0.285891	--	--	--	hypothetical protein OsI_06092 [Oryza sativa Indica Group]
Os05g0501200	8.68e-07	-2.28265	Molecular Function: protein binding (GO:0005515);; Biological Process: transcription from RNA polymerase II promoter (GO:0006366);; Cellular Component: intracellular membrane-bounded organelle (GO:0043231);;	--	--	transcription factor bHLH68 isoform X2 [Oryza sativa Japonica Group]
Os01g0501800	0.641263	-0.564058	--	K02716|0|osa:4324479|oxygen-evolving enhancer protein 1, chloroplastic	Photosynthesis (ko00195)	oxygen-evolving enhancer protein 1, chloroplastic [Oryza sativa Japonica Group]
Os02g0689800	0.498336	0.49909	--	--	--	putative photoperiod independent early flowering1 [Oryza sativa Japonica Group]
Os08g0335200	0.750397	0.354021	Molecular Function: protein kinase activity (GO:0004672);; Biological Process: cellular protein modification process (GO:0006464);; Cellular Component: intrinsic component of membrane (GO:0031224);; Molecular Function: purine ribonucleoside binding (GO:0032550);;	--	--	LEAF RUST 10 DISEASE-RESISTANCE LOCUS RECEPTOR-LIKE PROTEIN KINASE-like 2.1 isoform X1 [Oryza sativa Japonica Group]
Os07g0670300	0.383439	0.789838	--	--	--	protein SRC2 [Oryza sativa Japonica Group]
Os05g0498366	0.728882	0.386401	--	--	--	Os05g0498366, partial [Oryza sativa Japonica Group]
Os08g0309300	0.941993	0.0440959	--	--	--	hypothetical protein EE612_043438 [Oryza sativa]
Os01g0924200	0.290442	-0.738852	Cellular Component: intrinsic component of membrane (GO:0031224);;	--	--	uncharacterized protein LOC4327259 [Oryza sativa Japonica Group]
Os11g0132700	0.401482	0.430901	--	K14320|0|osa:4349688|aladin	RNA transport (ko03013)	aladin [Oryza sativa Japonica Group]
Os06g0295700	0.415554	-0.464896	Cellular Component: membrane (GO:0016020);; Cellular Component: intracellular membrane-bounded organelle (GO:0043231);;	--	--	Os06g0295700, partial [Oryza sativa Japonica Group]
Os03g0247300	0.335337	-0.372661	--	--	--	uncharacterized protein LOC4332246 [Oryza sativa Japonica Group]
Os06g0134000	0.00793717	1.45635	--	K02969|8.68345e-77|osa:4340027|40S ribosomal protein S20	Ribosome (ko03010)	40S ribosomal protein S20 [Oryza sativa Japonica Group]
Os01g0327600	0.885892	-0.114209	--	K17601|0|osa:4326972|protein GFS12 isoform X1	--	Os01g0327600 [Oryza sativa Japonica Group]
Os06g0116600	0.465391	0.568788	Cellular Component: intracellular membrane-bounded organelle (GO:0043231);;	--	--	putative DAL1 protein [Oryza sativa Japonica Group]
Os07g0498900	0.153237	0.842275	--	--	--	protein trichome birefringence-like 13 isoform X1 [Oryza sativa Japonica Group]
Os10g0465000	0.318856	0.390436	--	K22382|9.28612e-176|osa:4348836|WD repeat-containing protein 26	--	Os10g0465000, partial [Oryza sativa Japonica Group]
Os04g0561500	0.623576	0.487439	--	K01322|0|osa:4336657|prolyl endopeptidase	--	prolyl endopeptidase [Oryza sativa Japonica Group]
Os01g0850100	0.0152176	3.92897	Molecular Function: catalytic activity (GO:0003824);; Biological Process: membrane lipid metabolic process (GO:0006643);; Biological Process: response to stress (GO:0006950);; Cellular Component: intrinsic component of membrane (GO:0031224);; Cellular Component: intracellular membrane-bounded organelle (GO:0043231);;	--	--	phosphatidylinositol:ceramide inositolphosphotransferase [Oryza sativa Japonica Group]
Os02g0110900	0.371496	-0.754239	Cellular Component: intracellular membrane-bounded organelle (GO:0043231);;	--	--	Os02g0110900, partial [Oryza sativa Japonica Group]
Os05g0420500	0.961341	-0.0487441	--	--	--	unknown protein [Oryza sativa Japonica Group]
Os05g0376300	0.958536	-0.0590103	Biological Process: mitotic cell cycle (GO:0000278);; Biological Process: recombinational repair (GO:0000725);; Biological Process: developmental process involved in reproduction (GO:0003006);; Biological Process: meiotic cell cycle (GO:0007126);; Molecular Function: transferase activity, transferring acyl groups other than amino-acyl groups (GO:0016747);; Biological Process: root system developm…	K11268|0|osa:4338615|protein CHROMOSOME TRANSMISSION FIDELITY 7	--	protein CHROMOSOME TRANSMISSION FIDELITY 7 isoform X1 [Oryza sativa Japonica Group]
Os02g0174800	0.65315	-0.415175	--	--	--	hypothetical protein OsI_06053 [Oryza sativa Indica Group]
Os09g0111800	0.949652	0.0453211	Molecular Function: small molecule binding (GO:0036094);; Molecular Function: organic cyclic compound binding (GO:0097159);;	--	--	hypothetical protein OsI_30382 [Oryza sativa Indica Group]
Os02g0829900	0.729991	0.200901	Biological Process: cell morphogenesis involved in differentiation (GO:0000904);; Molecular Function: protein binding (GO:0005515);; Biological Process: protein complex assembly (GO:0006461);; Cellular Component: membrane (GO:0016020);; Biological Process: actin cytoskeleton organization (GO:0030036);; Cellular Component: intracellular non-membrane-bounded organelle (GO:0043232);; Cellular Compon…	--	--	probable protein BRICK1 [Oryza sativa Japonica Group]
Os05g0146100	0.402399	0.542309	Cellular Component: intracellular membrane-bounded organelle (GO:0043231);;	--	--	uncharacterized protein LOC4337797 [Oryza sativa Japonica Group]
Os03g0740600	0.923095	-0.0751433	Biological Process: biosynthetic process (GO:0009058);; Molecular Function: transferase activity, transferring alkyl or aryl (other than methyl) groups (GO:0016765);; Biological Process: gametophyte development (GO:0048229);;	K00809|0|osa:4334056|deoxyhypusine synthase	--	deoxyhypusine synthase isoform X1 [Oryza sativa Japonica Group]
Os06g0687500	0.465395	-0.325214	--	--	--	U2 small nuclear ribonucleoprotein B&apos;&apos; [Oryza sativa Japonica Group]
Os07g0571600	0.896207	0.205717	--	--	--	fatty-acid-binding protein 1 [Oryza sativa Japonica Group]
Os07g0669700	0.85264	0.215531	Cellular Component: intrinsic component of membrane (GO:0031224);; Molecular Function: metal ion transmembrane transporter activity (GO:0046873);; Biological Process: cellular potassium ion transport (GO:0071804);;	--	--	potassium transporter 7 isoform X2 [Oryza sativa Japonica Group]
Os08g0359500	0.0731584	0.741902	Cellular Component: cytoplasm (GO:0005737);; Cellular Component: cell-cell junction (GO:0005911);; Cellular Component: membrane (GO:0016020);;	--	--	uncharacterized protein Os08g0359500 [Oryza sativa Japonica Group]
Os07g0632800	0.0266799	-0.761761	Molecular Function: protein kinase activity (GO:0004672);; Biological Process: cellular protein modification process (GO:0006464);; Biological Process: phosphate-containing compound metabolic process (GO:0006796);; Molecular Function: purine ribonucleoside binding (GO:0032550);;	--	--	hypothetical protein OsI_26985 [Oryza sativa Indica Group]
Os01g0824600	0.3474	0.670734	Molecular Function: protein kinase activity (GO:0004672);; Biological Process: cellular protein modification process (GO:0006464);; Biological Process: phosphate-containing compound metabolic process (GO:0006796);; Biological Process: cell communication (GO:0007154);; Cellular Component: intrinsic component of membrane (GO:0031224);; Molecular Function: purine ribonucleoside binding (GO:0032550);;	K07198|0|osa:107275263|CBL-interacting protein kinase 11	--	Os01g0824600, partial [Oryza sativa Japonica Group]
Os11g0684000	0.0250703	3.42725	Molecular Function: nucleic acid binding (GO:0003676);;	K09422|0|osa:4351131|transcription factor MYB108	--	transcription factor JAMYB [Oryza sativa Japonica Group]
Os02g0698000	0.106252	-1.32745	--	K00855|0|osa:4330413|phosphoribulokinase, chloroplastic	Carbon fixation in photosynthetic organisms (ko00710);; Carbon metabolism (ko01200)	phosphoribulokinase, chloroplastic [Oryza sativa Japonica Group]
Os06g0648200	0.572152	0.285069	--	--	--	unknown protein [Oryza sativa Japonica Group]
Os04g0228300	0.55369	-0.47249	Cellular Component: intracellular membrane-bounded organelle (GO:0043231);;	--	--	unnamed protein product [Oryza sativa Japonica Group]
Os08g0509200	0.00344725	-2.13963	--	K01188|0|osa:4345995|beta-glucosidase 27	Cyanoamino acid metabolism (ko00460);; Starch and sucrose metabolism (ko00500);; Phenylpropanoid biosynthesis (ko00940)	beta-glucosidase 27 [Oryza sativa Japonica Group]
Os05g0270200	0.494806	0.287778	--	--	--	Os05g0270200, partial [Oryza sativa Japonica Group]
Os02g0697700	0.129629	-0.627187	--	--	--	uncharacterized protein LOC4330410 isoform X1 [Oryza sativa Japonica Group]
Os11g0261900	0.160594	1.6672	Molecular Function: catalytic activity (GO:0003824);; Cellular Component: cytoplasm (GO:0005737);;	--	--	shewanella-like protein phosphatase 2 [Oryza sativa Japonica Group]
Os04g0502200	0.735626	0.206532	--	K20306|0|osa:4336316|trafficking protein particle complex II-specific subunit 120 homolog	--	trafficking protein particle complex II-specific subunit 120 homolog [Oryza sativa Japonica Group]
Os09g0512900	0.195393	1.61564	Cellular Component: membrane (GO:0016020);; Cellular Component: intracellular membrane-bounded organelle (GO:0043231);;	--	--	unnamed protein product [Oryza sativa Japonica Group]
Os11g0104866	0.60996	0.375543	Cellular Component: clathrin-coated pit (GO:0005905);; Cellular Component: trans-Golgi network transport vesicle membrane (GO:0012510);; Biological Process: protein transport (GO:0015031);;	--	--	Os11g0104866 [Oryza sativa Japonica Group]
Os12g0105950	0.409839	0.704176	--	K03178|0|osa:4349557|ubiquitin-activating enzyme E1 2	Ubiquitin mediated proteolysis (ko04120)	ubiquitin-activating enzyme E1 2 [Oryza sativa Japonica Group]
Os02g0180700	0.325963	-0.946837	Cellular Component: intrinsic component of membrane (GO:0031224);; Molecular Function: cofactor binding (GO:0048037);;	K09753|0|osa:4328509|cinnamoyl-CoA reductase 2	Phenylpropanoid biosynthesis (ko00940)	cinnamoyl-CoA reductase 2 [Oryza sativa Japonica Group]
Os12g0618800	0.102975	1.04469	Molecular Function: UDP-glycosyltransferase activity (GO:0008194);; Cellular Component: intrinsic component of membrane (GO:0031224);;	--	--	uncharacterized protein LOC4352812 [Oryza sativa Japonica Group]
Os06g0136500	0.880241	0.152629	Cellular Component: intrinsic component of membrane (GO:0031224);; Biological Process: establishment of localization (GO:0051234);;	--	--	Os06g0136500 [Oryza sativa Japonica Group]
Os07g0570500	0.912851	-0.0570382	--	K01408|0|osa:4343660|zinc-metallopeptidase, peroxisomal isoform X1	--	insulin-degrading enzyme-like 1, peroxisomal isoform X1 [Oryza sativa Japonica Group]
Os06g0295900	0.0377103	2.96543	Cellular Component: intrinsic component of membrane (GO:0031224);;	--	--	Os06g0295900, partial [Oryza sativa Japonica Group]
Os01g0894300	0.778891	-0.208847	Molecular Function: hexokinase activity (GO:0004396);; Biological Process: starch metabolic process (GO:0005982);; Biological Process: phosphorylation (GO:0016310);; Biological Process: pentose metabolic process (GO:0019321);; Molecular Function: purine ribonucleoside binding (GO:0032550);;	K00847|0|osa:4324962|fructokinase-1	Fructose and mannose metabolism (ko00051);; Starch and sucrose metabolism (ko00500);; Amino sugar and nucleotide sugar metabolism (ko00520)	fructokinase-1 [Oryza sativa Japonica Group]
Os09g0386400	0.364004	-0.433515	--	--	--	enhanced ethylene response protein 5 [Oryza sativa Japonica Group]
Os01g0817100	0.999903	0.000120464	Cellular Component: intrinsic component of membrane (GO:0031224);;	--	--	transmembrane protein 56-B isoform X1 [Oryza sativa Japonica Group]
Os01g0929500	0.560837	0.321862	Molecular Function: catalytic activity (GO:0003824);; Biological Process: single-organism metabolic process (GO:0044710);;	K00079|0|osa:4326939|(+)-neomenthol dehydrogenase	Arachidonic acid metabolism (ko00590);; Folate biosynthesis (ko00790)	(+)-neomenthol dehydrogenase [Oryza sativa Japonica Group]
Os02g0625300	0.00839366	3.81197	--	--	--	phosphoenolpyruvate carboxylase kinase 2 [Oryza sativa Japonica Group]
Os01g0503400	0.84423	0.274953	Biological Process: transport (GO:0006810);; Cellular Component: intrinsic component of membrane (GO:0031224);; Biological Process: transition metal ion homeostasis (GO:0055076);;	--	--	unnamed protein product [Oryza sativa Japonica Group]
Os08g0513000	0.292577	0.97246	Biological Process: cellular protein modification process (GO:0006464);; Molecular Function: phosphatase activity (GO:0016791);; Cellular Component: intracellular membrane-bounded organelle (GO:0043231);;	K04460|0|osa:107278396|serine/threonine-protein phosphatase 7-like	--	serine/threonine-protein phosphatase 7 isoform X1 [Oryza sativa Japonica Group]
Os03g0131500	0.806055	0.154383	Cellular Component: plastid (GO:0009536);; Molecular Function: oxidoreductase activity, acting on NAD(P)H, quinone or similar compound as acceptor (GO:0016655);; Biological Process: photosynthesis, light reaction (GO:0019684);; Cellular Component: intrinsic component of membrane (GO:0031224);; Biological Process: single-organism metabolic process (GO:0044710);;	--	--	thiol-disulfide oxidoreductase LTO1 [Oryza sativa Japonica Group]
Os02g0829600	0.563792	-0.490461	Cellular Component: intracellular membrane-bounded organelle (GO:0043231);;	--	--	uncharacterized protein LOC9267029 isoform X2 [Oryza sativa Japonica Group]
Os05g0586300	0.898287	0.0890088	Molecular Function: protein binding (GO:0005515);; Biological Process: transcription, DNA-templated (GO:0006351);; Biological Process: guard cell differentiation (GO:0010052);; Molecular Function: carboxylic acid binding (GO:0031406);; Cellular Component: intracellular membrane-bounded organelle (GO:0043231);; Biological Process: negative regulation of cellular process (GO:0048523);;	--	--	hypothetical protein OsI_21175 [Oryza sativa Indica Group]
Os10g0560000	0.793652	-0.518454	--	--	--	VAN3-binding protein [Oryza sativa Japonica Group]
Os11g0106800	0.112586	1.92711	Biological Process: meiosis I (GO:0007127);;	--	--	Os11g0106800, partial [Oryza sativa Japonica Group]
Os01g0814400	0.681289	-0.372028	Cellular Component: intrinsic component of membrane (GO:0031224);;	--	--	Os01g0814400, partial [Oryza sativa Japonica Group]
Os09g0436700	0.853675	0.110781	Molecular Function: hydrolase activity (GO:0016787);; Biological Process: protein metabolic process (GO:0019538);;	--	--	uncharacterized protein LOC4347151 [Oryza sativa Japonica Group]
Os06g0701200	0.680813	0.891737	Cellular Component: cytoplasm (GO:0005737);; Biological Process: phosphorus metabolic process (GO:0006793);; Biological Process: nucleotide-sugar metabolic process (GO:0009225);; Cellular Component: cell projection (GO:0042995);; Biological Process: gametophyte development (GO:0048229);; Molecular Function: UTP-monosaccharide-1-phosphate uridylyltransferase activity (GO:0051748);;	K12447|0|osa:4341967|UDP-sugar pyrophosphorylase	Pentose and glucuronate interconversions (ko00040);; Galactose metabolism (ko00052);; Ascorbate and aldarate metabolism (ko00053);; Amino sugar and nucleotide sugar metabolism (ko00520)	UDP-sugar pyrophosphorylase [Oryza sativa Japonica Group]
Os07g0209401	0.47965	-0.496179	Biological Process: DNA metabolic process (GO:0006259);; Molecular Function: transferase activity (GO:0016740);; Molecular Function: organic cyclic compound binding (GO:0097159);; Molecular Function: heterocyclic compound binding (GO:1901363);;	--	--	Os07g0209401 [Oryza sativa Japonica Group]
Os04g0500700	0.903792	0.12981	Molecular Function: transferase activity, transferring acyl groups (GO:0016746);; Cellular Component: intracellular membrane-bounded organelle (GO:0043231);;	K13065|0|osa:4336306|shikimate O-hydroxycinnamoyltransferase	Phenylpropanoid biosynthesis (ko00940);; Flavonoid biosynthesis (ko00941);; Stilbenoid, diarylheptanoid and gingerol biosynthesis (ko00945)	hydroxycinnamoyltransferase 1 [Oryza sativa Japonica Group]
Os08g0360000	0.97708	-0.0325603	--	--	--	uncharacterized protein LOC4345374 [Oryza sativa Japonica Group]
Os06g0647700	0.185522	1.15837	--	--	--	Os06g0647700 [Oryza sativa Japonica Group]
Os02g0226000	0.253797	-0.68062	Cellular Component: intrinsic component of membrane (GO:0031224);;	K13347|2.52788e-114|osa:4328779|peroxisomal membrane protein PMP22	Peroxisome (ko04146)	hypothetical protein OsI_06429 [Oryza sativa Indica Group]
Os05g0568800	0.00492074	-2.16675	--	--	--	bradykinin-potentiating and C-type natriuretic peptides [Oryza sativa Japonica Group]
Os01g0214001	0.0650597	2.36058	Molecular Function: nucleic acid binding (GO:0003676);; Biological Process: transcription, DNA-templated (GO:0006351);; Biological Process: shoot system morphogenesis (GO:0010016);; Biological Process: regulation of development, heterochronic (GO:0040034);; Cellular Component: intracellular membrane-bounded organelle (GO:0043231);; Biological Process: phyllome development (GO:0048827);; Biologica…	--	--	Os01g0213800, partial [Oryza sativa Japonica Group]
Os05g0356800	0.355019	-0.51773	--	--	--	hapless 2 [Oryza sativa Japonica Group]
Os10g0147900	0.892975	0.139188	--	--	--	uncharacterized protein LOC4348108 [Oryza sativa Japonica Group]
Os06g0114000	0.00121502	1.43106	--	K04077|0|osa:4339910|ruBisCO large subunit-binding protein subunit beta, chloroplastic	RNA degradation (ko03018)	ruBisCO large subunit-binding protein subunit beta, chloroplastic [Oryza sativa Japonica Group]
Os01g0935500	0.800704	0.168688	Cellular Component: intrinsic component of membrane (GO:0031224);; Molecular Function: metal ion transmembrane transporter activity (GO:0046873);; Biological Process: cellular potassium ion transport (GO:0071804);;	K03549|0|osa:4326793|probable potassium transporter 2	--	probable potassium transporter 2 [Oryza sativa Japonica Group]
Os04g0543900	0.0312169	2.96355	Molecular Function: oxidoreductase activity, acting on the CH-NH2 group of donors, NAD or NADP as acceptor (GO:0016639);; Biological Process: carboxylic acid metabolic process (GO:0019752);; Molecular Function: purine ribonucleoside binding (GO:0032550);; Cellular Component: vacuolar part (GO:0044437);; Molecular Function: transition metal ion binding (GO:0046914);;	K00261|6.63948e-69|osa:4336554|glutamate dehydrogenase 2	Arginine biosynthesis (ko00220);; Alanine, aspartate and glutamate metabolism (ko00250);; Nitrogen metabolism (ko00910);; Carbon metabolism (ko01200)	putative glutamate dehydrogenase 2, partial [Triticum monococcum subsp. aegilopoides]
Os08g0509500	0.75189	-0.192025	--	--	--	G patch domain-containing protein 11 [Oryza sativa Japonica Group]
Os11g0446500	0.494018	-0.396051	Molecular Function: catalytic activity (GO:0003824);; Molecular Function: phospholipid transporter activity (GO:0005548);; Biological Process: phospholipid transport (GO:0015914);; Cellular Component: intrinsic component of membrane (GO:0031224);; Molecular Function: purine ribonucleoside binding (GO:0032550);; Molecular Function: metal ion binding (GO:0046872);;	K01530|0|osa:4350436|phospholipid-transporting ATPase 2 isoform X1	--	phospholipid-transporting ATPase 2 isoform X1 [Oryza sativa Japonica Group]
Os06g0552400	0.876509	0.138829	--	--	--	Os06g0552400 [Oryza sativa Japonica Group]
Os05g0270400	0.9542	0.0364351	--	K17553|3.55724e-22|osa:4338259|type 1 phosphatases regulator YPI1	--	protein phosphatase 1 regulatory subunit INH3 [Oryza sativa Japonica Group]
Os01g0329400	0.055998	2.05297	--	K15121|0|osa:4326984|solute carrier family 25 member 44	--	solute carrier family 25 member 44 [Oryza sativa Japonica Group]
Os02g0625000	0.616351	0.302813	Molecular Function: protein binding (GO:0005515);; Biological Process: chromatin organization (GO:0006325);; Biological Process: response to stress (GO:0006950);; Biological Process: circadian rhythm (GO:0007623);; Biological Process: response to light stimulus (GO:0009416);; Molecular Function: photoreceptor activity (GO:0009881);; Biological Process: flower development (GO:0009908);; Biological…	K12119|0|osa:9270575|cryptochrome-1 isoform X1	Circadian rhythm - plant (ko04712)	cryptochrome-1 isoform X1 [Oryza sativa Japonica Group]
Os08g0310100	0.264842	0.648606	--	K02876|8.80449e-145|osa:4345238|50S ribosomal protein L15	Ribosome (ko03010)	uncharacterized protein LOC4345238 [Oryza sativa Japonica Group]
Os01g0848300	0.203909	1.2831	Biological Process: mRNA processing (GO:0006397);; Cellular Component: intrinsic component of membrane (GO:0031224);; Cellular Component: intracellular membrane-bounded organelle (GO:0043231);; Molecular Function: transition metal ion binding (GO:0046914);;	--	--	hypothetical protein EE612_006818 [Oryza sativa]
Os08g0266600	0.740384	0.205173	--	--	--	nuclear pore complex protein NUP43 [Oryza sativa Japonica Group]
Os05g0215800	0.865242	-0.0953794	--	--	--	UDP-rhamnose/UDP-galactose transporter 6 [Oryza sativa Japonica Group]
Os05g0132500	0.914575	0.056343	--	--	--	protein EMBRYO SAC DEVELOPMENT ARREST 30 [Oryza sativa Japonica Group]
Os10g0317900	0.82112	-0.186004	--	K05280|0|osa:4348299|flavonoid 3'-monooxygenase	Flavonoid biosynthesis (ko00941);; Flavone and flavonol biosynthesis (ko00944)	flavonoid 3&apos;-monooxygenase CYP75B4-like [Oryza sativa Japonica Group]
Os01g0895600	0.765719	0.267868	Biological Process: activation of innate immune response (GO:0002218);; Molecular Function: protein binding (GO:0005515);; Biological Process: response to bacterium (GO:0009617);; Biological Process: flavonoid metabolic process (GO:0009812);; Cellular Component: intrinsic component of membrane (GO:0031224);; Biological Process: cellular response to stress (GO:0033554);; Cellular Component: intrac…	--	--	Os01g0895600 [Oryza sativa Japonica Group]
Os09g0515200	0.787188	0.277844	Cellular Component: proteasome complex (GO:0000502);; Molecular Function: endopeptidase activity (GO:0004175);; Cellular Component: cytosol (GO:0005829);; Biological Process: modification-dependent protein catabolic process (GO:0019941);; Cellular Component: intracellular membrane-bounded organelle (GO:0043231);;	K02736|8.6747e-149|osa:4347573|proteasome subunit beta type-4	Proteasome (ko03050)	proteasome subunit beta type-4 [Oryza sativa Japonica Group]
Os12g0448900	0.865912	0.195957	Biological Process: response to acid chemical (GO:0001101);; Cellular Component: lipid droplet (GO:0005811);; Biological Process: unsaturated fatty acid biosynthetic process (GO:0006636);; Biological Process: fatty acid catabolic process (GO:0009062);; Biological Process: response to fungus (GO:0009620);; Biological Process: defense response, incompatible interaction (GO:0009814);; Molecular Func…	K10529|0|osa:4352160|alpha-dioxygenase 1 isoform X1	alpha-Linolenic acid metabolism (ko00592)	alpha-dioxygenase 1 isoform X1 [Oryza sativa Japonica Group]
Os01g0935700	0.44476	-0.349901	--	--	--	unnamed protein product [Oryza sativa Japonica Group]
Os04g0497700	0.122422	-1.01546	Molecular Function: catalytic activity (GO:0003824);; Biological Process: nucleoside diphosphate metabolic process (GO:0009132);; Cellular Component: intracellular part (GO:0044424);; Molecular Function: transition metal ion binding (GO:0046914);;	--	--	zinc finger protein CONSTANS-LIKE 3 [Oryza sativa Japonica Group]
Os05g0244500	0.693668	0.269237	Molecular Function: actin binding (GO:0003779);; Molecular Function: hydrolase activity, acting on glycosyl bonds (GO:0016798);; Biological Process: actin cytoskeleton organization (GO:0030036);; Biological Process: primary metabolic process (GO:0044238);;	--	--	glucan 1,3-beta-glucosidase [Oryza sativa Japonica Group]
Os03g0131900	0.590524	0.879829	Molecular Function: protein binding (GO:0005515);; Biological Process: protein targeting to membrane (GO:0006612);; Biological Process: response to radiation (GO:0009314);; Cellular Component: plastid envelope (GO:0009526);; Cellular Component: chloroplast thylakoid (GO:0009534);; Cellular Component: signal recognition particle (GO:0048500);;	K12271|0|osa:4331514|probable signal recognition particle 43 kDa protein, chloroplastic	--	probable signal recognition particle 43 kDa protein, chloroplastic [Oryza sativa Japonica Group]
Os05g0419500	0.0553077	-1.28972	Molecular Function: nucleic acid binding (GO:0003676);; Cellular Component: intracellular membrane-bounded organelle (GO:0043231);;	--	--	KH domain-containing protein At1g09660/At1g09670 isoform X2 [Oryza sativa Japonica Group]
Os03g0133400	0.0966812	2.29405	Molecular Function: protein binding (GO:0005515);; Biological Process: response to stress (GO:0006950);; Cellular Component: intrinsic component of membrane (GO:0031224);; Molecular Function: carbohydrate derivative binding (GO:0097367);;	K13473|0|osa:4331523|chitin elicitor-binding protein	Plant-pathogen interaction (ko04626)	chitin elicitor binding protein, partial [Oryza sativa Japonica Group]
Os05g0549900	0.799683	-0.268863	Biological Process: cellular process (GO:0009987);; Cellular Component: intrinsic component of membrane (GO:0031224);;	--	--	Os05g0549900 [Oryza sativa Japonica Group]
Os05g0500000	0.0578317	-1.31956	--	--	--	scopoletin glucosyltransferase [Oryza sativa Japonica Group]
Os01g0327100	0.00806851	3.67157	--	K00430|0|osa:4326969|peroxidase 1	Phenylpropanoid biosynthesis (ko00940)	peroxidase 1 isoform X2 [Oryza sativa Japonica Group]
Os01g0815800	0.101879	0.672367	--	K02896|1.56309e-80|osa:4327483|60S ribosomal protein L24	Ribosome (ko03010)	60S ribosomal protein L24 [Oryza sativa Japonica Group]
Os06g0687450	0.871835	-0.179425	--	--	--	probable methyltransferase PMT9 isoform X1 [Oryza sativa Japonica Group]
Os02g0700700	0.0379522	-1.08293	--	--	--	protein Brevis radix-like 2 isoform X1 [Oryza sativa Japonica Group]
Os11g0312220	0.970399	-0.0290696	Biological Process: nucleotide metabolic process (GO:0009117);; Molecular Function: kinase activity (GO:0016301);; Molecular Function: phosphotransferase activity, phosphate group as acceptor (GO:0016776);; Molecular Function: purine ribonucleoside binding (GO:0032550);; Cellular Component: intracellular part (GO:0044424);;	K00939|3.35776e-172|osa:107276068|adenylate kinase 4	Purine metabolism (ko00230);; Thiamine metabolism (ko00730);; Biosynthesis of cofactors (ko01240)	adenylate kinase 4 [Oryza sativa Japonica Group]
Os07g0252000	0.793652	0.140105	Biological Process: sulfur compound metabolic process (GO:0006790);; Cellular Component: protein complex (GO:0043234);;	--	--	protein CIA1 [Oryza sativa Japonica Group]
Os09g0434500	0.0496902	-0.989628	Molecular Function: nucleic acid binding transcription factor activity (GO:0001071);; Molecular Function: nucleic acid binding (GO:0003676);; Biological Process: transcription, DNA-templated (GO:0006351);; Cellular Component: intracellular membrane-bounded organelle (GO:0043231);; Biological Process: response to other organism (GO:0051707);;	K09286|0|osa:4347142|ethylene-responsive transcription factor 1-like	--	ethylene-responsive transcription factor 1-like [Oryza sativa Japonica Group]
Os04g0432600	0.844078	0.145505	Cellular Component: intrinsic component of membrane (GO:0031224);; Cellular Component: intracellular membrane-bounded organelle (GO:0043231);;	--	--	uncharacterized protein LOC4335882 [Oryza sativa Japonica Group]
Os01g0625300	0.0127621	-1.90155	--	K09419|2.73819e-178|osa:4326685|heat stress transcription factor C-1a	--	heat stress transcription factor C-1a [Oryza sativa Japonica Group]
Os10g0443200	0.113	1.14946	Molecular Function: DNA binding (GO:0003677);;	--	--	Os10g0443200, partial [Oryza sativa Japonica Group]
Os01g0928300	0.492928	0.480278	--	K17560|1.54496e-165|osa:9272710|RNA polymerase II subunit 5-mediating protein homolog	--	RNA polymerase II subunit 5-mediating protein homolog [Oryza sativa Japonica Group]
Os01g0922600	0.418593	0.566908	Molecular Function: nucleic acid binding (GO:0003676);; Biological Process: transcription, DNA-templated (GO:0006351);; Molecular Function: cation binding (GO:0043169);; Cellular Component: intracellular membrane-bounded organelle (GO:0043231);;	--	--	Os01g0922600, partial [Oryza sativa Japonica Group]
Os07g0672500	0.514906	-0.4102	Molecular Function: purine ribonucleoside binding (GO:0032550);;	--	--	uncharacterized protein LOC4344250 [Oryza sativa Japonica Group]
Os09g0115400	0.0120054	1.92596	Molecular Function: nucleic acid binding (GO:0003676);; Molecular Function: small molecule binding (GO:0036094);; Cellular Component: intracellular part (GO:0044424);;	K13126|0|osa:4346409|polyadenylate-binding protein 2	RNA transport (ko03013);; mRNA surveillance pathway (ko03015);; RNA degradation (ko03018)	polyadenylate-binding protein 2 [Oryza sativa Japonica Group]
Os01g0357100	7.89e-06	-1.54347	Cellular Component: extracellular region (GO:0005576);; Cellular Component: plastid stroma (GO:0009532);; Molecular Function: oxidoreductase activity, acting on other nitrogenous compounds as donors, iron-sulfur protein as acceptor (GO:0016664);; Biological Process: nitrate metabolic process (GO:0042126);; Molecular Function: cation binding (GO:0043169);; Molecular Function: tetrapyrrole binding …	K00366|0|osa:4326014|ferredoxin--nitrite reductase, chloroplastic	Nitrogen metabolism (ko00910)	ferredoxin--nitrite reductase, chloroplastic isoform X2 [Oryza sativa Japonica Group]
Os01g0931400	0.9314	0.101047	Cellular Component: cytoplasm (GO:0005737);; Biological Process: phosphate-containing compound metabolic process (GO:0006796);; Biological Process: coenzyme biosynthetic process (GO:0009108);; Molecular Function: diphosphotransferase activity (GO:0016778);; Molecular Function: vitamin binding (GO:0019842);; Molecular Function: purine ribonucleoside binding (GO:0032550);; Biological Process: thiam…	K00949|2.9797e-121|osa:4326818|thiamine pyrophosphokinase 1 isoform X1	Thiamine metabolism (ko00730);; Biosynthesis of cofactors (ko01240)	thiamine pyrophosphokinase 1 isoform X2 [Oryza sativa Japonica Group]
Os11g0312340	0.961341	-0.0466664	Biological Process: tRNA wobble base modification (GO:0002097);; Molecular Function: protein binding (GO:0005515);; Biological Process: transcription from RNA polymerase II promoter (GO:0006366);; Biological Process: tRNA methylation (GO:0030488);; Molecular Function: purine ribonucleoside binding (GO:0032550);; Biological Process: meristem growth (GO:0035266);; Cellular Component: intracellular …	--	--	Os11g0312340 [Oryza sativa Japonica Group]
Os01g0328500	0.488422	0.400821	--	--	--	craniofacial development protein 1 [Oryza sativa Japonica Group]
Os10g0559650	0.631863	0.393278	Cellular Component: cell-cell junction (GO:0005911);;	--	--	hypothetical protein OsJ_32446 [Oryza sativa Japonica Group]
Os03g0769800	0.0109126	1.62312	Molecular Function: nucleic acid binding transcription factor activity (GO:0001071);; Molecular Function: nucleic acid binding (GO:0003676);; Biological Process: transcription, DNA-templated (GO:0006351);; Cellular Component: intrinsic component of membrane (GO:0031224);; Cellular Component: intracellular membrane-bounded organelle (GO:0043231);;	--	--	putative homeodomain leucine-zipper protein Hox9 [Oryza sativa Japonica Group]
Os05g0499800	0.523561	0.507819	--	--	--	scopoletin glucosyltransferase [Oryza sativa Japonica Group]
Os03g0769000	0.853809	-0.30299	--	--	--	Os03g0769000, partial [Oryza sativa Japonica Group]
Os01g0273300	0.888572	0.129711	--	--	--	hypothetical protein OsI_01355 [Oryza sativa Indica Group]
Os05g0498300	0.0492123	1.46944	Molecular Function: double-stranded DNA binding (GO:0003690);; Cellular Component: nucleus (GO:0005634);; Cellular Component: chromosome (GO:0005694);; Biological Process: mismatch repair (GO:0006298);; Biological Process: synapsis (GO:0007129);; Biological Process: reciprocal meiotic recombination (GO:0007131);; Molecular Function: purine ribonucleoside binding (GO:0032550);;	K08741|0|osa:4339215|DNA mismatch repair protein MSH5 isoform X1	--	hypothetical protein OsJ_19071 [Oryza sativa Japonica Group]
Os08g0506500	0.696774	0.288411	--	--	--	Os08g0506500 [Oryza sativa Japonica Group]
Os02g0109800	0.640165	0.225896	Cellular Component: membrane (GO:0016020);; Cellular Component: intracellular membrane-bounded organelle (GO:0043231);;	--	--	protein KINESIN LIGHT CHAIN-RELATED 1 [Oryza sativa Japonica Group]
Os02g0233100	0.46417	-0.336255	--	K20523|0|osa:4328815|uncharacterized protein LOC4328815	--	uncharacterized protein LOC4328815 [Oryza sativa Japonica Group]
Os01g0384800	0.876547	1.12901	--	--	--	uncharacterized protein LOC4325431 [Oryza sativa Japonica Group]
Os11g0120600	0.677112	-0.375349	Cellular Component: cytoplasm (GO:0005737);; Molecular Function: hydrolase activity, acting on carbon-nitrogen (but not peptide) bonds, in linear amides (GO:0016811);; Molecular Function: hydrolase activity, acting on acid anhydrides, in sulfonyl-containing anhydrides (GO:0016819);;	K01522|2.76658e-122|osa:4349630|bis(5'-adenosyl)-triphosphatase	Purine metabolism (ko00230)	bifunctional bis(5&apos;-adenosyl)-triphosphatase/adenylylsulfatase FHIT [Oryza sativa Japonica Group]
Os02g0700300	1.73e-06	-3.13875	--	--	--	myb family transcription factor PHL11 [Oryza sativa Japonica Group]
Os01g0213800	0.00779363	2.23512	Molecular Function: nucleic acid binding (GO:0003676);; Biological Process: transcription, DNA-templated (GO:0006351);; Biological Process: shoot system morphogenesis (GO:0010016);; Biological Process: regulation of development, heterochronic (GO:0040034);; Cellular Component: intracellular membrane-bounded organelle (GO:0043231);; Biological Process: phyllome development (GO:0048827);; Biologica…	--	--	hypothetical protein EE612_001030, partial [Oryza sativa]
Os03g0110800	0.764996	-0.303734	Biological Process: DNA alkylation (GO:0006305);; Molecular Function: transferase activity, transferring one-carbon groups (GO:0016741);;	--	--	DNA (cytosine-5)-methyltransferase DRM2 [Oryza sativa Japonica Group]
Os01g0603200	0.396461	1.29756	--	--	--	hypothetical protein OsI_02746 [Oryza sativa Indica Group]
Os11g0104900	0.670945	-0.845752	Cellular Component: clathrin-coated pit (GO:0005905);; Cellular Component: trans-Golgi network transport vesicle membrane (GO:0012510);; Biological Process: protein transport (GO:0015031);;	K04646|0|osa:4349546|clathrin heavy chain 1	Endocytosis (ko04144)	hypothetical protein OsI_37152 [Oryza sativa Indica Group]
Os05g0147200	0.865242	-0.171989	--	K17583|0|osa:4337800|nucleolar MIF4G domain-containing protein 1	--	nucleolar MIF4G domain-containing protein 1 [Oryza sativa Japonica Group]
Os01g0935600	0.0247774	1.08176	Cellular Component: plastid (GO:0009536);;	--	--	Os01g0935600 [Oryza sativa Japonica Group]
Os08g0359300	0.382496	0.849786	Molecular Function: endopeptidase activity (GO:0004175);; Biological Process: protein metabolic process (GO:0019538);; Cellular Component: intracellular membrane-bounded organelle (GO:0043231);;	--	--	uncharacterized protein LOC4345368 isoform X1 [Oryza sativa Japonica Group]
Os10g0561400	0.976924	0.0182926	--	--	--	Os10g0561400 [Oryza sativa Japonica Group]
Os01g0384300	0.0826761	-0.740666	--	--	--	probable LRR receptor-like serine/threonine-protein kinase RKF3 [Oryza sativa Japonica Group]
Os07g0252400	0.0806968	-1.61025	Molecular Function: cellulose synthase activity (GO:0016759);; Biological Process: cellulose metabolic process (GO:0030243);; Cellular Component: intrinsic component of membrane (GO:0031224);; Biological Process: external encapsulating structure organization (GO:0045229);; Molecular Function: transition metal ion binding (GO:0046914);;	K10999|0|osa:4342850|probable cellulose synthase A catalytic subunit 6 [UDP-forming]	--	probable cellulose synthase A catalytic subunit 6 [UDP-forming] [Oryza sativa Japonica Group]
Os01g0933200	0.689137	-0.524071	--	--	--	heavy metal-associated isoprenylated plant protein 35 [Oryza sativa Japonica Group]
Os06g0222800	0.84381	-0.170349	Molecular Function: catalytic activity (GO:0003824);; Cellular Component: intrinsic component of membrane (GO:0031224);; Cellular Component: intracellular part (GO:0044424);; Biological Process: intracellular transport (GO:0046907);;	K23362|0|osa:4340526|metallophosphoesterase 1	--	metallophosphoesterase 1 [Oryza sativa Japonica Group]
Os12g0460800	0.473148	0.611594	Molecular Function: protein kinase activity (GO:0004672);; Biological Process: RNA processing (GO:0006396);; Biological Process: protein phosphorylation (GO:0006468);; Molecular Function: purine ribonucleoside binding (GO:0032550);;	K08287|6.06591e-131|osa:4352182|serine/threonine-protein kinase AFC2	--	Serine/threonine-protein kinase AFC2 [Zea mays]
Os08g0290000	0.246593	-0.533738	--	--	--	pentatricopeptide repeat-containing protein At4g19440, chloroplastic isoform X1 [Oryza sativa Japonica Group]
Os09g0512950	0.0203207	3.62992	--	--	--	unnamed protein product, partial [Oryza sativa Japonica Group]
Os01g0358400	0.00118572	1.29091	--	K02987|2.13025e-169|osa:4326022|40S ribosomal protein S4-like	Ribosome (ko03010)	40S ribosomal protein S4-like [Oryza sativa Japonica Group]
Os02g0173700	0.6016	-0.260444	--	--	--	Os02g0173700, partial [Oryza sativa Japonica Group]
Os10g0318000	0.936362	-0.110569	--	--	--	hypothetical protein EE612_050624, partial [Oryza sativa]
Os07g0464200	0.0977736	-1.11133	--	--	--	hypothetical protein OsI_25913 [Oryza sativa Indica Group]
Os05g0374000	0.341793	-0.653218	Molecular Function: nucleotide binding (GO:0000166);; Biological Process: cellular aromatic compound metabolic process (GO:0006725);; Molecular Function: oxidoreductase activity, acting on the CH-NH group of donors (GO:0016645);; Cellular Component: extracellular region part (GO:0044421);; Biological Process: single-organism metabolic process (GO:0044710);;	K00279|0|osa:4338605|cytokinin dehydrogenase 9	Zeatin biosynthesis (ko00908)	cytokinin dehydrogenase 9 [Oryza sativa Japonica Group]
Os07g0631200	0.772439	0.300862	--	--	--	E3 ubiquitin-protein ligase SIRP1-like [Oryza sativa Japonica Group]
Os01g0936800	0.0277027	-1.5218	--	--	--	vesicle-associated protein 1-2 [Oryza sativa Japonica Group]
Os01g0499300	0.648131	-0.207397	--	K11866|0|osa:4324542|AMSH-like ubiquitin thioesterase 3	Endocytosis (ko04144)	AMSH-like ubiquitin thioesterase 3 [Oryza sativa Japonica Group]
Os02g0828200	0.899358	0.115205	--	--	--	hypothetical protein OsJ_08971 [Oryza sativa Japonica Group]
Os07g0271000	0.0898815	1.88614	Molecular Function: catalytic activity (GO:0003824);; Molecular Function: GDP-dissociation inhibitor activity (GO:0005092);; Biological Process: protein localization (GO:0008104);; Biological Process: intracellular signal transduction (GO:0035556);; Cellular Component: cell part (GO:0044464);; Biological Process: single-organism metabolic process (GO:0044710);; Biological Process: regulation of m…	K17255|0|osa:4342895|guanosine nucleotide diphosphate dissociation inhibitor 2	--	guanosine nucleotide diphosphate dissociation inhibitor 2 [Oryza sativa Japonica Group]
Os10g0389800	0.973831	0.0555117	Biological Process: cellular protein modification process (GO:0006464);; Biological Process: phosphate-containing compound metabolic process (GO:0006796);; Molecular Function: kinase activity (GO:0016301);; Cellular Component: intrinsic component of membrane (GO:0031224);; Molecular Function: purine ribonucleoside binding (GO:0032550);;	--	--	protein STRUBBELIG-RECEPTOR FAMILY 7 isoform X1 [Oryza sativa Japonica Group]
Os03g0111400	0.243182	1.50973	--	--	--	Os03g0111400, partial [Oryza sativa Japonica Group]
Os03g0741600	0.128535	2.35954	Cellular Component: intrinsic component of membrane (GO:0031224);;	--	--	Os03g0741600 [Oryza sativa Japonica Group]
Os06g0649500	0.877156	-0.0996044	--	K03130|5.37955e-26|osa:4341679|transcription initiation factor TFIID subunit 5	Basal transcription factors (ko03022)	Os06g0649500 [Oryza sativa Japonica Group]
Os01g0823700	0.948399	0.0573082	--	--	--	protein GRAVITROPIC IN THE LIGHT 1 isoform X1 [Oryza sativa Japonica Group]
Os07g0438800	0.134427	-0.584156	Molecular Function: nucleic acid binding (GO:0003676);; Biological Process: transcription, DNA-templated (GO:0006351);; Cellular Component: intrinsic component of membrane (GO:0031224);; Cellular Component: intracellular membrane-bounded organelle (GO:0043231);;	--	--	protein PHOSPHATE STARVATION RESPONSE 2 [Oryza sativa Japonica Group]
Os01g0848900	0.0599151	2.6142	--	--	--	uncharacterized protein LOC4324857 isoform X1 [Oryza sativa Japonica Group]
Os03g0248200	0.665991	0.28538	Molecular Function: monooxygenase activity (GO:0004497);; Cellular Component: intrinsic component of membrane (GO:0031224);; Biological Process: single-organism metabolic process (GO:0044710);; Molecular Function: tetrapyrrole binding (GO:0046906);; Molecular Function: transition metal ion binding (GO:0046914);;	--	--	geraniol 8-hydroxylase isoform X1 [Oryza sativa Japonica Group]
Os08g0506850	0.073841	-0.988883	--	--	--	Os08g0506850, partial [Oryza sativa Japonica Group]
Os01g0505400	0.622249	0.593739	Molecular Function: carbon-carbon lyase activity (GO:0016830);; Molecular Function: vitamin binding (GO:0019842);; Molecular Function: metal ion binding (GO:0046872);;	--	--	unnamed protein product [Oryza sativa Japonica Group]
Os02g0732500	0.0617329	1.31842	Biological Process: immune effector process (GO:0002252);; Cellular Component: intrinsic component of membrane (GO:0031224);; Molecular Function: purine ribonucleoside binding (GO:0032550);; Biological Process: intracellular signal transduction (GO:0035556);; Cellular Component: cell part (GO:0044464);;	K07955|3.78819e-130|osa:4330631|ADP-ribosylation factor-like protein 8A	--	ADP-ribosylation factor-like protein 8c [Oryza sativa Japonica Group]
Os04g0544100	0.763953	-0.218405	Molecular Function: protein binding (GO:0005515);; Molecular Function: protein-lysine N-methyltransferase activity (GO:0016279);; Biological Process: histone methylation (GO:0016571);; Cellular Component: intracellular membrane-bounded organelle (GO:0043231);; Molecular Function: transition metal ion binding (GO:0046914);;	K11420|0|osa:4336555|histone-lysine N-methyltransferase, H3 lysine-9 specific SUVH5	--	hypothetical protein OsJ_15653 [Oryza sativa Japonica Group]
Os01g0931300	0.867056	-0.0985872	--	K13511|0|osa:4326817|uncharacterized protein LOC4326817	Glycerophospholipid metabolism (ko00564)	uncharacterized protein LOC4326817 [Oryza sativa Japonica Group]
Os12g0207300	0.981808	-0.019908	Biological Process: protein localization (GO:0008104);; Molecular Function: substrate-specific transporter activity (GO:0022892);; Cellular Component: intracellular membrane-bounded organelle (GO:0043231);; Biological Process: establishment of localization (GO:0051234);;	K11827|7.36094e-98|fve:101307955|AP-2 complex subunit sigma	Endocytosis (ko04144)	PREDICTED: AP-2 complex subunit sigma [Fragaria vesca subsp. vesca]
Os01g0542700	0.531655	0.70326	--	--	--	ocs element-binding factor 1 [Oryza sativa Japonica Group]
Os11g0682300	0.758952	0.137059	--	K12837|0|osa:4351124|splicing factor U2af large subunit B isoform X2	Spliceosome (ko03040)	Os11g0682300, partial [Oryza sativa Japonica Group]
Os06g0687700	0.408183	0.46736	--	K09499|0|osa:4341893|T-complex protein 1 subunit eta	--	T-complex protein 1 subunit eta [Oryza sativa Japonica Group]
Os01g0626500	0.440897	0.737265	--	--	--	Os01g0626500 [Oryza sativa Japonica Group]
Os02g0730800	0.618287	-0.493764	Molecular Function: nucleic acid binding (GO:0003676);; Cellular Component: plastid (GO:0009536);; Biological Process: mRNA modification (GO:0016556);; Molecular Function: small molecule binding (GO:0036094);;	--	--	organelle RRM domain-containing protein 1, chloroplastic-like [Oryza sativa Japonica Group]
Os10g0148400	0.223752	-1.15831	Cellular Component: intrinsic component of membrane (GO:0031224);; Biological Process: establishment of localization (GO:0051234);;	--	--	protein NRT1/ PTR FAMILY 5.10 [Oryza sativa Japonica Group]
Os05g0132400	0.695991	-0.365907	--	--	--	Os05g0132400, partial [Oryza sativa Japonica Group]
Os01g0589500	0.844141	-0.0905327	Cellular Component: intracellular membrane-bounded organelle (GO:0043231);;	--	--	Os01g0589500, partial [Oryza sativa Japonica Group]
Os07g0160400	0.622091	-0.45362	--	K08234|1.42397e-104|osa:4342451|uncharacterized protein YwkD	--	uncharacterized protein LOC4342451 [Oryza sativa Japonica Group]
Os09g0511700	0.0540212	1.01782	--	K01188|0|osa:4347546|beta-glucosidase 32	Cyanoamino acid metabolism (ko00460);; Starch and sucrose metabolism (ko00500);; Phenylpropanoid biosynthesis (ko00940)	beta-glucosidase 32 [Oryza sativa Japonica Group]
Os05g0587200	0.745396	0.206383	Cellular Component: cytoplasmic chromosome (GO:0000229);; Biological Process: metabolic process (GO:0008152);; Cellular Component: plastid (GO:0009536);; Molecular Function: transferase activity, transferring one-carbon groups (GO:0016741);;	--	--	hypothetical protein OsJ_19720 [Oryza sativa Japonica Group]
Os04g0583800	0.395974	0.709649	Molecular Function: nucleic acid binding (GO:0003676);; Cellular Component: plastid (GO:0009536);; Molecular Function: small molecule binding (GO:0036094);;	--	--	hypothetical protein OsJ_15917 [Oryza sativa Japonica Group]
Os12g0620400	0.372819	0.515501	Molecular Function: nucleic acid binding (GO:0003676);; Cellular Component: intracellular membrane-bounded organelle (GO:0043231);;	--	--	hypothetical protein OsJ_36903 [Oryza sativa Japonica Group]
Os11g0102900	0.389513	-0.642896	Molecular Function: protein kinase activity (GO:0004672);; Biological Process: cellular protein modification process (GO:0006464);; Cellular Component: intrinsic component of membrane (GO:0031224);; Molecular Function: purine ribonucleoside binding (GO:0032550);;	--	--	probable LRR receptor-like serine/threonine-protein kinase At1g67720 [Oryza sativa Japonica Group]
Os04g0431100	0.891833	0.139417	Cellular Component: plastid stroma (GO:0009532);; Biological Process: cellular process (GO:0009987);; Molecular Function: adenyl nucleotide binding (GO:0030554);; Cellular Component: mitochondrial part (GO:0044429);; Molecular Function: transition metal ion binding (GO:0046914);; Molecular Function: protein dimerization activity (GO:0046983);; Biological Process: regulation of molecular function …	--	--	uncharacterized protein LOC4335871 [Oryza sativa Japonica Group]
Os05g0261700	0.572386	-0.644097	--	--	--	Os05g0261700, partial [Oryza sativa Japonica Group]
Os03g0768450	0.359949	-0.730557	Molecular Function: nucleotide binding (GO:0000166);; Cellular Component: mitochondrion (GO:0005739);; Biological Process: respiratory electron transport chain (GO:0022904);; Molecular Function: cofactor binding (GO:0048037);; Molecular Function: NADH dehydrogenase (quinone) activity (GO:0050136);;	--	--	Os03g0768450 [Oryza sativa Japonica Group]
Os01g0269900	0.366039	0.649418	Biological Process: chromatin organization (GO:0006325);; Biological Process: transcription, DNA-templated (GO:0006351);; Biological Process: response to stress (GO:0006950);; Biological Process: response to abiotic stimulus (GO:0009628);; Biological Process: flower development (GO:0009908);; Cellular Component: intracellular membrane-bounded organelle (GO:0043231);;	K11662|0|osa:4326270|actin-related protein 6	--	actin-related protein 6 [Oryza sativa Japonica Group]
Os01g0543000	0.976826	0.0553504	--	--	--	hypothetical protein OsJ_02141 [Oryza sativa Japonica Group]
Os05g0373700	0.108125	0.858555	--	--	--	nascent polypeptide-associated complex subunit alpha-like protein 1 [Oryza sativa Japonica Group]
Os01g0541800	0.446719	1.18854	--	K15382|6.50078e-155|osa:4326868|bidirectional sugar transporter SWEET2a	--	bidirectional sugar transporter SWEET2a [Oryza sativa Japonica Group]
Os01g0823200	0.261185	-1.05288	Cellular Component: intrinsic component of membrane (GO:0031224);;	--	--	Os01g0823200 [Oryza sativa Japonica Group]
Os01g0328400	5.92e-06	1.56202	--	K02977|2.99094e-81|sita:101759893|ubiquitin-40S ribosomal protein S27a-1	Ribosome (ko03010);; Ubiquitin mediated proteolysis (ko04120)	PREDICTED: ubiquitin-40S ribosomal protein S27a-1 [Oryza brachyantha]
Os07g0570700	0.241948	0.768637	--	K02838|6.77716e-152|osa:4343662|ribosome-recycling factor, chloroplastic	--	ribosome-recycling factor, chloroplastic [Oryza sativa Japonica Group]
Os01g0897800	0.686686	0.316606	Cellular Component: nucleus (GO:0005634);; Biological Process: sister chromatid cohesion (GO:0007062);;	K06670|0|osa:4325108|sister chromatid cohesion 1 protein 4	--	sister chromatid cohesion 1 protein 4 [Oryza sativa Japonica Group]
Os04g0581300	0.420408	0.602949	Cellular Component: mitochondrial envelope (GO:0005740);; Biological Process: protein localization (GO:0008104);; Molecular Function: transition metal ion binding (GO:0046914);; Biological Process: establishment of localization (GO:0051234);;	K17781|1.95341e-42|osa:4336766|mitochondrial import inner membrane translocase subunit Tim13-like	--	mitochondrial import inner membrane translocase subunit Tim13-like [Oryza sativa Japonica Group]
Os03g0110400	0.592992	0.254871	Biological Process: RNA export from nucleus (GO:0006405);; Biological Process: response to fungus (GO:0009620);; Biological Process: production of siRNA involved in RNA interference (GO:0030422);; Cellular Component: intracellular membrane-bounded organelle (GO:0043231);; Cellular Component: protein complex (GO:0043234);;	K12878|0|osa:4331353|THO complex subunit 1	RNA transport (ko03013);; Spliceosome (ko03040)	THO complex subunit 1 [Oryza sativa Japonica Group]
Os01g0928800	0.191009	-0.589435	Biological Process: membrane lipid metabolic process (GO:0006643);; Molecular Function: C-palmitoyltransferase activity (GO:0016454);; Cellular Component: intrinsic component of membrane (GO:0031224);; Molecular Function: anion binding (GO:0043168);; Cellular Component: intracellular membrane-bounded organelle (GO:0043231);;	K00654|0|osa:4326966|long chain base biosynthesis protein 2d	Sphingolipid metabolism (ko00600)	long chain base biosynthesis protein 2d [Oryza sativa Japonica Group]
Os02g0689700	0.803089	0.471407	--	K02881|4.07754e-100|osa:4330370|50S ribosomal protein L18	Ribosome (ko03010)	uncharacterized protein LOC4330370 [Oryza sativa Japonica Group]
Os01g0814900	0.230075	-0.702431	Molecular Function: oxidoreductase activity, acting on NAD(P)H, heme protein as acceptor (GO:0016653);; Cellular Component: intrinsic component of membrane (GO:0031224);; Biological Process: single-organism metabolic process (GO:0044710);;	K00326|0|osa:4327480|NADH--cytochrome b5 reductase 1	Amino sugar and nucleotide sugar metabolism (ko00520)	NADH--cytochrome b5 reductase 1 [Oryza sativa Japonica Group]
Os10g0558900	1.81e-07	-2.56861	--	--	--	Os10g0558900 [Oryza sativa Japonica Group]
Os03g0355200	0.75218	0.148235	--	K12662|0|osa:4332861|U4/U6 small nuclear ribonucleoprotein PRP4-like protein	Spliceosome (ko03040)	U4/U6 small nuclear ribonucleoprotein PRP4-like protein [Oryza sativa Japonica Group]
Os01g0271200	0.888038	0.108748	--	K01885|0|osa:4325167|glutamate--tRNA ligase, cytoplasmic	Porphyrin and chlorophyll metabolism (ko00860);; Aminoacyl-tRNA biosynthesis (ko00970);; Biosynthesis of cofactors (ko01240)	glutamate--tRNA ligase, cytoplasmic [Oryza sativa Japonica Group]
Os01g0727500	2.44e-06	6.46117	Cellular Component: intracellular membrane-bounded organelle (GO:0043231);;	K18159|6.69408e-71|osa:4324734|probable complex I intermediate-associated protein 30	--	hypothetical protein OsJ_03324 [Oryza sativa Japonica Group]
Os02g0180100	0.989221	0.0140643	--	K05610|0|osa:4328506|ubiquitin carboxyl-terminal hydrolase isozyme L5	--	hypothetical protein OsJ_05623 [Oryza sativa Japonica Group]
Os02g0324700	0.0479451	2.01922	--	--	--	Os02g0324700, partial [Oryza sativa Japonica Group]
Os09g0116900	0.668277	-0.487289	Biological Process: cell communication (GO:0007154);; Cellular Component: protein serine/threonine phosphatase complex (GO:0008287);; Biological Process: regulation of phosphoprotein phosphatase activity (GO:0043666);;	--	--	Os09g0116900 [Oryza sativa Japonica Group]
Os11g0106200	0.52706	0.650579	Cellular Component: membrane (GO:0016020);;	--	--	Os11g0106200, partial [Oryza sativa Japonica Group]
Os05g0214300	0.179314	-1.30694	--	--	--	Os05g0214300 [Oryza sativa Japonica Group]
Os02g0226200	0.335951	0.81307	Biological Process: phosphate-containing compound metabolic process (GO:0006796);; Molecular Function: phosphoric ester hydrolase activity (GO:0042578);;	K13248|7.60301e-167|osa:4328780|inorganic pyrophosphatase 2	Vitamin B6 metabolism (ko00750);; Biosynthesis of cofactors (ko01240)	inorganic pyrophosphatase 2 [Oryza sativa Japonica Group]
Os05g0498800	0.516903	0.322	--	--	--	protein ALP1-like [Oryza sativa Japonica Group]
Os10g0111300	0.992169	0.0137997	Biological Process: peptide transport (GO:0015833);; Cellular Component: intrinsic component of membrane (GO:0031224);;	--	--	Os10g0111300 [Oryza sativa Japonica Group]
Os04g0430700	3.32e-07	-2.57338	--	--	--	subtilisin-like protease SBT1.7 [Oryza sativa Japonica Group]
Os04g0563050	0.5981	0.600019	Cellular Component: intrinsic component of membrane (GO:0031224);; Cellular Component: intracellular membrane-bounded organelle (GO:0043231);;	--	--	Os04g0563000, partial [Oryza sativa Japonica Group]
Os10g0562000	0.22501	1.01277	--	--	--	formin-like protein 1 [Oryza sativa Japonica Group]
Os11g0103400	0.73659	-0.28369	--	--	--	Os11g0103400, partial [Oryza sativa Japonica Group]
Os02g0730500	0.325963	0.715056	Cellular Component: intracellular membrane-bounded organelle (GO:0043231);;	--	--	rRNA-processing protein fcf2 [Oryza sativa Japonica Group]
Os08g0511900	0.818689	-0.185056	Molecular Function: hydrolase activity, acting on carbon-nitrogen (but not peptide) bonds, in linear amides (GO:0016811);; Biological Process: protein metabolic process (GO:0019538);; Biological Process: carboxylic acid metabolic process (GO:0019752);; Molecular Function: cation binding (GO:0043169);; Cellular Component: intracellular part (GO:0044424);; Molecular Function: peptidase activity, ac…	--	--	Os08g0511900 [Oryza sativa Japonica Group]
Os06g0649900	0.734212	-0.24796	--	K16860|0|osa:4341683|phospholipase D Z	Glycerophospholipid metabolism (ko00564);; Ether lipid metabolism (ko00565)	hypothetical protein OsI_23920 [Oryza sativa Indica Group]
Os03g0247100	0.933912	0.614413	--	--	--	uncharacterized protein LOC4332244 [Oryza sativa Japonica Group]
Os11g0129800	0.660619	0.451004	Cellular Component: intracellular membrane-bounded organelle (GO:0043231);;	--	--	uncharacterized protein LOC4349668 [Oryza sativa Japonica Group]
Os05g0145900	0.881999	-0.136246	Cellular Component: intrinsic component of membrane (GO:0031224);; Cellular Component: intracellular membrane-bounded organelle (GO:0043231);;	--	--	Os05g0145900, partial [Oryza sativa Japonica Group]
Os05g0586700	2.27e-09	8.88289	Cellular Component: intrinsic component of membrane (GO:0031224);; Cellular Component: intracellular membrane-bounded organelle (GO:0043231);;	--	--	Os05g0586700 [Oryza sativa Japonica Group]
Os02g0232000	0.00058734	2.2582	Molecular Function: nucleic acid binding transcription factor activity (GO:0001071);; Molecular Function: DNA binding (GO:0003677);; Biological Process: transcription, DNA-templated (GO:0006351);; Cellular Component: intracellular membrane-bounded organelle (GO:0043231);;	K09419|6.50903e-139|osa:4328809|heat stress transcription factor C-2a	--	heat stress transcription factor C-2a [Oryza sativa Japonica Group]
Os03g0329500	0.0365329	1.69556	--	K01179|0|osa:4332724|endoglucanase 9	Starch and sucrose metabolism (ko00500)	endoglucanase 9 [Oryza sativa Japonica Group]
Os06g0134800	0.0014083	3.62648	--	K22073|0|osa:4340033|putative transferase At4g12130, mitochondrial	--	putative transferase At4g12130, mitochondrial [Oryza sativa Japonica Group]
Os11g0264200	0.0464833	-0.937941	--	--	--	F-box/LRR-repeat protein 12 [Oryza sativa Japonica Group]
Os01g0816100	0.0370503	2.40835	Molecular Function: nucleic acid binding (GO:0003676);; Biological Process: transcription, DNA-templated (GO:0006351);; Cellular Component: intracellular membrane-bounded organelle (GO:0043231);;	--	--	NAC domain-containing protein 68 [Oryza sativa Japonica Group]
Os10g0466000	0.683167	0.337198	--	--	--	uncharacterized protein LOC4348841 [Oryza sativa Japonica Group]
Os10g0110950	0.735582	-0.384452	Biological Process: peptide transport (GO:0015833);; Cellular Component: intrinsic component of membrane (GO:0031224);;	--	--	Major Facilitator Superfamily protein, expressed [Oryza sativa Japonica Group]
Os11g0121300	0.547605	0.47441	--	--	--	uncharacterized protein LOC4349632 [Oryza sativa Japonica Group]
Os09g0511500	0.336984	-0.368191	Molecular Function: transition metal ion binding (GO:0046914);;	--	--	uncharacterized protein LOC4347544 [Oryza sativa Japonica Group]
Os07g0569600	0.288633	-0.978276	Molecular Function: protein kinase activity (GO:0004672);; Biological Process: cellular protein modification process (GO:0006464);; Cellular Component: intrinsic component of membrane (GO:0031224);; Molecular Function: purine ribonucleoside binding (GO:0032550);; Cellular Component: intracellular membrane-bounded organelle (GO:0043231);;	--	--	chaperonin-like RbcX protein 2, chloroplastic [Oryza sativa Japonica Group]
Os03g0135100	0.956867	-0.0769672	--	K00799|2.72691e-166|osa:4331533|glutathione S-transferase F11	Glutathione metabolism (ko00480)	glutathione S-transferase F11 [Oryza sativa Japonica Group]
Os02g0697800	0.0460792	-0.97753	--	K19995|1.11575e-158|osa:9266378|secretory carrier-associated membrane protein 5	--	secretory carrier-associated membrane protein 5 [Oryza sativa Japonica Group]
Os02g0830300	0.209482	-0.441875	Cellular Component: intrinsic component of membrane (GO:0031224);;	--	--	Os02g0830300 [Oryza sativa Japonica Group]
Os04g0272200	0.775638	0.258503	Biological Process: metabolic process (GO:0008152);; Molecular Function: transferase activity, transferring glycosyl groups (GO:0016757);;	--	--	OSJNBb0056F09.12 [Oryza sativa Japonica Group]
Os03g0133000	0.926967	0.151415	Molecular Function: nucleic acid binding (GO:0003676);; Biological Process: transcription, DNA-templated (GO:0006351);; Cellular Component: intracellular membrane-bounded organelle (GO:0043231);;	--	--	NAC domain-containing protein 22-like [Oryza sativa Japonica Group]
Os01g0856900	0.00678598	-1.15519	Molecular Function: polysaccharide binding (GO:0030247);;	--	--	uncharacterized protein LOC4324752 [Oryza sativa Japonica Group]
Os12g0619000	0.0215004	-1.57627	--	--	--	protein IQ-DOMAIN 1 isoform X1 [Oryza sativa Japonica Group]
Os10g0467900	0.153403	-1.12565	--	--	--	hypothetical protein EE612_051749, partial [Oryza sativa]
Os01g0214200	0.982524	0.0237089	--	K23978|7.67447e-161|osa:4325253|GDSL esterase/lipase At5g45920	--	GDSL esterase/lipase At5g45920 [Oryza sativa Japonica Group]
Os05g0551000	0.164403	0.953806	Molecular Function: transition metal ion binding (GO:0046914);;	K16276|0|osa:4339530|uncharacterized protein LOC4339530 isoform X1	--	hypothetical protein OsJ_19457 [Oryza sativa Japonica Group]
Os06g0701600	0.803089	0.156667	Biological Process: cation transport (GO:0006812);; Molecular Function: cation transmembrane transporter activity (GO:0008324);; Cellular Component: intrinsic component of membrane (GO:0031224);;	--	--	probable cation transporter HKT9 [Oryza sativa Japonica Group]
Os02g0174700	0.484473	-0.612709	--	--	--	hypothetical protein OsI_06053 [Oryza sativa Indica Group]
Os04g0640600	0.885017	-0.171954	--	K00891|4.6482e-72|egu:105041687|shikimate kinase 3, chloroplastic	Phenylalanine, tyrosine and tryptophan biosynthesis (ko00400);; Biosynthesis of amino acids (ko01230)	shikimate kinase 3, chloroplastic [Elaeis guineensis]
Os11g0103700	0.873665	-0.0820075	--	--	--	mitochondrial substrate carrier family protein C [Oryza sativa Japonica Group]
Os02g0828900	0.880003	-0.137604	Molecular Function: nucleic acid binding (GO:0003676);; Molecular Function: transition metal ion binding (GO:0046914);;	K15601|0|osa:4331234|lysine-specific demethylase JMJ25	--	lysine-specific demethylase JMJ25 [Oryza sativa Japonica Group]
Os05g0568600	0.996594	-0.00310822	--	--	--	uncharacterized protein LOC4339649 [Oryza sativa Japonica Group]
Os02g0690500	0.149436	0.968163	--	--	--	probable protein phosphatase 2C 26 [Oryza sativa Japonica Group]
Os01g0930800	0.880241	0.154799	--	K01188|0|osa:4326948|beta-glucosidase 5	Cyanoamino acid metabolism (ko00460);; Starch and sucrose metabolism (ko00500);; Phenylpropanoid biosynthesis (ko00940)	beta-glucosidase 5 [Oryza sativa Japonica Group]
Os03g0355100	0.560106	0.520679	--	--	--	uncharacterized protein LOC4332860 [Oryza sativa Japonica Group]
Os06g0494100	0.0515489	-0.723314	--	--	--	hypothetical protein OsJ_21426 [Oryza sativa Japonica Group]
Os04g0561700	0.206199	1.05857	Molecular Function: nucleic acid binding (GO:0003676);; Biological Process: RNA modification (GO:0009451);; Molecular Function: intramolecular transferase activity (GO:0016866);; Cellular Component: intracellular membrane-bounded organelle (GO:0043231);;	K07583|0|osa:4336659|putative tRNA pseudouridine synthase Pus10	--	putative tRNA pseudouridine synthase Pus10 isoform X1 [Oryza sativa Japonica Group]
Os04g0501500	0.248667	-0.574425	Biological Process: protein oligomerization (GO:0051259);;	--	--	BTB/POZ domain-containing protein At2g24240 [Oryza sativa Japonica Group]
Os05g0355300	0.123117	1.58085	Cellular Component: intrinsic component of membrane (GO:0031224);; Cellular Component: intracellular membrane-bounded organelle (GO:0043231);; Molecular Function: transition metal ion binding (GO:0046914);;	--	--	uncharacterized protein LOC4338515 [Oryza sativa Japonica Group]
Os11g0211700	0.967959	-0.0538222	--	--	--	Os11g0211700, partial [Oryza sativa Japonica Group]
Os08g0511500	0.465924	-0.427235	Cellular Component: intracellular membrane-bounded organelle (GO:0043231);;	--	--	hypothetical protein EE612_021694 [Oryza sativa]
Os06g0649800	0.0751513	-1.306	--	K01246|0|osa:4341682|probable GMP synthase [glutamine-hydrolyzing]	Base excision repair (ko03410)	uncharacterized protein LOC4341682 [Oryza sativa Japonica Group]
Os01g0627400	0.514582	-0.5399	--	--	--	cytochrome P450 72A13 isoform X1 [Oryza sativa Japonica Group]
Os05g0357100	0.238578	-0.962066	Molecular Function: exonuclease activity (GO:0004527);; Biological Process: nucleic acid metabolic process (GO:0090304);; Molecular Function: organic cyclic compound binding (GO:0097159);;	--	--	uncharacterized protein LOC4338523 isoform X1 [Oryza sativa Japonica Group]
Os01g0727700	2.86e-06	3.68141	--	--	--	uncharacterized protein LOC9272673 [Oryza sativa Japonica Group]
Os02g0722700	0.700744	-0.32163	Molecular Function: RNA binding (GO:0003723);; Biological Process: translation (GO:0006412);; Cellular Component: intrinsic component of membrane (GO:0031224);; Cellular Component: intracellular membrane-bounded organelle (GO:0043231);;	--	--	KH domain-containing protein At5g56140 isoform X2 [Oryza sativa Japonica Group]
Os04g0501200	0.921795	-0.0817343	Biological Process: DNA repair (GO:0006281);; Cellular Component: intracellular membrane-bounded organelle (GO:0043231);; Molecular Function: DNA-3-methylbase glycosylase activity (GO:0043733);;	K01246|0|osa:4336309|probable GMP synthase [glutamine-hydrolyzing]	Base excision repair (ko03410)	uncharacterized protein LOC4336309 [Oryza sativa Japonica Group]
Os02g0502500	0.350786	-0.679584	--	--	--	uncharacterized protein LOC4329421 [Oryza sativa Japonica Group]
Os05g0499400	3.37e-05	-1.89308	--	K00430|0|osa:4339223|peroxidase 1-like	Phenylpropanoid biosynthesis (ko00940)	peroxidase 1-like [Oryza sativa Japonica Group]
Os04g0226600	0.623219	0.607323	--	--	--	Os04g0226600 [Oryza sativa Japonica Group]
Os12g0229100	0.128501	-1.03225	--	--	--	Os12g0229100, partial [Oryza sativa Japonica Group]
Os04g0544500	0.249728	-0.721579	--	--	--	uncharacterized protein LOC4336558 [Oryza sativa Japonica Group]
Os11g0102800	0.861288	0.149757	Molecular Function: nucleic acid binding (GO:0003676);; Biological Process: protein modification by small protein conjugation (GO:0032446);; Molecular Function: small molecule binding (GO:0036094);; Molecular Function: transition metal ion binding (GO:0046914);;	K10643|0|osa:4349535|uncharacterized protein LOC4349535	RNA degradation (ko03018)	uncharacterized protein LOC4349535 isoform X2 [Oryza sativa Japonica Group]
Os04g0597501	0.850276	0.14373	--	--	--	Os04g0597501 [Oryza sativa Japonica Group]
Os08g0207500	0.904854	0.146303	--	K14709|7.05842e-132|osa:4344937|zinc transporter 4	--	zinc transporter 4 [Oryza sativa Japonica Group]
Os07g0673000	0.0869955	-1.27024	--	--	--	Os07g0673000, partial [Oryza sativa Japonica Group]
Os01g0496900	0.911429	0.0765177	--	--	--	uncharacterized protein LOC4324538 [Oryza sativa Japonica Group]
Os06g0239500	0.425921	-0.758248	Cellular Component: intrinsic component of membrane (GO:0031224);; Biological Process: establishment of localization (GO:0051234);;	--	--	protein NRT1/ PTR FAMILY 5.8 [Oryza sativa Japonica Group]
Os12g0405400	0.991925	0.0196934	Cellular Component: intrinsic component of membrane (GO:0031224);;	--	--	Os12g0405400 [Oryza sativa Japonica Group]
Os01g0815400	0.678351	0.523087	--	--	--	hypothetical protein OsI_04198 [Oryza sativa Indica Group]
Os06g0238900	0.0209393	1.28301	--	--	--	uncharacterized protein LOC4340614 [Oryza sativa Japonica Group]
Os07g0669100	0.0339525	1.70411	--	K01805|0|osa:4344231|xylose isomerase isoform X1	Pentose and glucuronate interconversions (ko00040);; Fructose and mannose metabolism (ko00051)	hypothetical protein OsI_27268 [Oryza sativa Indica Group]
Os07g0631100	0.898207	-0.0912342	Biological Process: transcription, DNA-templated (GO:0006351);; Biological Process: translation (GO:0006412);; Molecular Function: translation factor activity, RNA binding (GO:0008135);; Molecular Function: cation binding (GO:0043169);; Cellular Component: intracellular membrane-bounded organelle (GO:0043231);;	--	--	transcription elongation factor 1 homolog [Oryza sativa Japonica Group]
Os04g0501600	0.694885	-0.245427	--	--	--	uncharacterized protein LOC4336311 [Oryza sativa Japonica Group]
Os03g0111700	0.435359	0.609253	Molecular Function: aminoacyl-tRNA ligase activity (GO:0004812);; Biological Process: tRNA aminoacylation for protein translation (GO:0006418);; Biological Process: regulation of translational elongation (GO:0006448);; Molecular Function: purine ribonucleoside binding (GO:0032550);; Molecular Function: carboxylic ester hydrolase activity (GO:0052689);;	K01873|0|osa:4333799|valine--tRNA ligase, mitochondrial 1	Aminoacyl-tRNA biosynthesis (ko00970)	hypothetical protein OsI_13120 [Oryza sativa Indica Group]
Os02g0732600	7.94e-07	4.14792	Molecular Function: nucleic acid binding (GO:0003676);;	K09422|2.04348e-153|osa:4330632|protein ODORANT1	--	protein ODORANT1 [Oryza sativa Japonica Group]
Os01g0856500	0.0523658	-1.46054	--	K13946|0|osa:4324749|auxin transporter-like protein 1	Plant hormone signal transduction (ko04075)	auxin transporter-like protein 1 [Oryza sativa Japonica Group]
Os07g0114400	0.990904	-0.0130451	Molecular Function: nucleic acid binding transcription factor activity (GO:0001071);; Molecular Function: protein kinase activity (GO:0004672);; Biological Process: cellular protein modification process (GO:0006464);; Biological Process: phosphate-containing compound metabolic process (GO:0006796);; Biological Process: response to light stimulus (GO:0009416);; Cellular Component: intrinsic compon…	K03097|0|osa:4342248|casein kinase II subunit alpha	Ribosome biogenesis in eukaryotes (ko03008);; Circadian rhythm - plant (ko04712)	casein kinase II subunit alpha-2 [Oryza sativa Japonica Group]
Os01g0563000	0.00411532	-2.1548	--	--	--	70 kDa peptidyl-prolyl isomerase isoform X3 [Oryza sativa Japonica Group]
Os07g0160000	0.241496	1.4023	--	--	--	ubiquitin carboxyl-terminal hydrolase 8 isoform X1 [Oryza sativa Japonica Group]
Os12g0106550	0.890641	-0.14454	--	--	--	hypothetical protein OsI_37173 [Oryza sativa Indica Group]
Os05g0214100	0.933072	-0.0968194	--	--	--	Os05g0214100 [Oryza sativa Japonica Group]
Os08g0266200	0.541569	-0.281322	Cellular Component: intrinsic component of membrane (GO:0031224);;	--	--	uncharacterized protein LOC4345119 [Oryza sativa Japonica Group]
Os08g0433600	0.0880938	-0.803379	Cellular Component: intrinsic component of membrane (GO:0031224);; Cellular Component: intracellular membrane-bounded organelle (GO:0043231);;	--	--	uncharacterized endoplasmic reticulum membrane protein YGL010W [Oryza sativa Japonica Group]
Os05g0549600	0.485947	0.554516	--	K01056|5.53304e-120|osa:4339520|peptidyl-tRNA hydrolase, mitochondrial-like	--	peptidyl-tRNA hydrolase, mitochondrial-like [Oryza sativa Japonica Group]
Os11g0210201	0.000782268	4.51551	--	--	--	uncharacterized protein LOC9269460 [Oryza sativa Japonica Group]
Os03g0165000	0.958834	0.0305044	Biological Process: mitotic cell cycle (GO:0000278);; Molecular Function: nucleic acid binding (GO:0003676);; Molecular Function: DNA topoisomerase activity (GO:0003916);; Cellular Component: intracellular (GO:0005622);; Biological Process: reciprocal meiotic recombination (GO:0007131);; Molecular Function: transition metal ion binding (GO:0046914);;	--	--	Os03g0165000, partial [Oryza sativa Japonica Group]
Os03g0110600	0.791821	-0.286459	--	--	--	uncharacterized protein LOC9267060 [Oryza sativa Japonica Group]
Os01g0934400	0.32933	1.59755	Cellular Component: photosystem II (GO:0009523);; Biological Process: cellular metabolic process (GO:0044237);; Molecular Function: metal ion binding (GO:0046872);;	--	--	Os01g0934400, partial [Oryza sativa Japonica Group]
Os01g0922800	0.562213	-0.429234	Molecular Function: nucleic acid binding transcription factor activity (GO:0001071);; Molecular Function: nucleic acid binding (GO:0003676);; Molecular Function: protein binding (GO:0005515);; Biological Process: transcription, DNA-templated (GO:0006351);; Cellular Component: intracellular membrane-bounded organelle (GO:0043231);;	--	--	RecName: Full=MADS-box transcription factor 51; Short=OsMADS51; AltName: Full=OsMADS65
Os10g0200000	0.783075	-0.2284	--	--	--	Os10g0200000, partial [Oryza sativa Japonica Group]
Os12g0104300	5.11e-08	-3.15078	Biological Process: macromolecule metabolic process (GO:0043170);; Cellular Component: intracellular membrane-bounded organelle (GO:0043231);;	--	--	protein DWARF 53-LIKE [Oryza sativa Japonica Group]
Os01g0600500	0.0413439	3.01895	--	--	--	Os01g0600500 [Oryza sativa Japonica Group]
Os01g0627933	0.789965	-0.325306	--	--	--	Os01g0627933 [Oryza sativa Japonica Group]
Os02g0773400	0.709412	0.301658	--	K05391|0|osa:4330882|probable cyclic nucleotide-gated ion channel 20, chloroplastic	Plant-pathogen interaction (ko04626)	probable cyclic nucleotide-gated ion channel 20, chloroplastic [Oryza sativa Japonica Group]
Os04g0498650	0.912346	-0.111407	--	K01611|0|osa:4336294|S-adenosylmethionine decarboxylase proenzyme isoform X1	Cysteine and methionine metabolism (ko00270);; Arginine and proline metabolism (ko00330)	OSJNBa0029H02.4 [Oryza sativa Japonica Group]
Os01g0856600	0.963443	-0.0347286	Molecular Function: structural molecule activity (GO:0005198);; Cellular Component: nuclear pore (GO:0005643);; Cellular Component: cytoplasm (GO:0005737);; Biological Process: macromolecule localization (GO:0033036);; Biological Process: nuclear export (GO:0051168);; Biological Process: organic substance transport (GO:0071702);;	--	--	Os01g0856600, partial [Oryza sativa Japonica Group]
Os03g0328000	0.472984	0.331111	Biological Process: intracellular signal transduction (GO:0035556);; Biological Process: regulation of GTPase activity (GO:0043087);; Cellular Component: cell part (GO:0044464);; Molecular Function: molecular function regulator (GO:0098772);;	--	--	Guanine nucleotide exchange factor, putative, expressed [Oryza sativa Japonica Group]
Os02g0224300	0.0785315	1.25169	Molecular Function: nucleic acid binding (GO:0003676);; Cellular Component: cytoplasm (GO:0005737);;	--	--	high molecular weight glutenin subunit x-like protein [Oryza sativa Japonica Group]
Os09g0436900	0.815026	0.148906	Cellular Component: plastid (GO:0009536);;	--	--	uncharacterized protein LOC4347153 [Oryza sativa Japonica Group]
Os03g0742400	0.968618	-0.0412238	--	--	--	Os03g0742400, partial [Oryza sativa Japonica Group]
Os05g0551900	0.362555	0.621924	Biological Process: response to acid chemical (GO:0001101);; Molecular Function: nucleic acid binding (GO:0003676);; Cellular Component: plastid (GO:0009536);;	--	--	Os05g0551900 [Oryza sativa Japonica Group]
Os02g0181900	0.0685487	0.893564	Biological Process: proteolysis (GO:0006508);; Biological Process: response to stress (GO:0006950);; Cellular Component: plastid envelope (GO:0009526);; Cellular Component: plastid stroma (GO:0009532);; Molecular Function: purine ribonucleoside binding (GO:0032550);;	K03695|0|osa:4328515|chaperone protein ClpB3, mitochondrial	--	chaperone protein ClpB3, mitochondrial [Oryza sativa Japonica Group]
Os04g0272500	0.995139	0.00598269	--	--	--	Os04g0272500 [Oryza sativa Japonica Group]
Os12g0156000	0.646741	0.290704	Cellular Component: intracellular membrane-bounded organelle (GO:0043231);;	--	--	hypothetical protein LOC_Os12g05970 [Oryza sativa Japonica Group]
Os02g0232050	0.000240351	2.41987	Molecular Function: nucleic acid binding transcription factor activity (GO:0001071);; Molecular Function: DNA binding (GO:0003677);; Biological Process: transcription, DNA-templated (GO:0006351);; Cellular Component: intracellular membrane-bounded organelle (GO:0043231);;	K09419|1.36198e-81|osa:4328809|heat stress transcription factor C-2a	--	heat stress transcription factor C-2a [Oryza sativa Japonica Group]
Os01g0495900	0.932253	0.0694586	--	--	--	CRS2-associated factor 1, chloroplastic isoform X1 [Oryza sativa Japonica Group]
Os01g0936100	0.150402	1.68792	--	--	--	receptor-like cytoplasmic kinase 185 [Oryza sativa Japonica Group]
Os03g0738200	0.589456	-0.208186	Biological Process: nuclear-transcribed mRNA catabolic process (GO:0000956);; Molecular Function: protein kinase activity (GO:0004672);; Biological Process: cellular protein modification process (GO:0006464);; Biological Process: phosphate-containing compound metabolic process (GO:0006796);; Molecular Function: purine ribonucleoside binding (GO:0032550);;	--	--	Os03g0738200 [Oryza sativa Japonica Group]
Os03g0330000	0.948336	-0.0553474	--	K13648|0|osa:4332727|probable galacturonosyltransferase 7	Amino sugar and nucleotide sugar metabolism (ko00520)	probable galacturonosyltransferase 7 [Oryza sativa Japonica Group]
Os06g0650100	0.148998	0.673745	--	K12158|1.88114e-88|sbi:8069343|ubiquitin-NEDD8-like protein RUB2	--	Os06g0650100, partial [Oryza sativa Japonica Group]
Os06g0686400	0.022488	2.25097	--	--	--	unknown protein [Oryza sativa Japonica Group]
Os04g0562000	0.468753	-0.570125	Molecular Function: palmitoyltransferase activity (GO:0016409);; Cellular Component: intrinsic component of membrane (GO:0031224);; Molecular Function: transition metal ion binding (GO:0046914);;	K18932|0|osa:4336661|protein S-acyltransferase 10 isoform X1	--	protein S-acyltransferase 10 isoform X1 [Oryza sativa Japonica Group]
Os09g0387150	0.976115	0.0305178	--	--	--	hypothetical protein OsI_31229 [Oryza sativa Indica Group]
Os12g0228900	0.479924	0.410251	--	--	--	uncharacterized protein LOC4351826 [Oryza sativa Japonica Group]
Os02g0110600	0.487313	-0.999809	Molecular Function: protein kinase activity (GO:0004672);; Biological Process: cellular protein modification process (GO:0006464);; Biological Process: phosphate-containing compound metabolic process (GO:0006796);; Biological Process: phloem or xylem histogenesis (GO:0010087);; Molecular Function: enzyme binding (GO:0019899);; Cellular Component: intrinsic component of membrane (GO:0031224);; Mol…	--	--	receptor-like serine/threonine-protein kinase NCRK isoform X2 [Oryza sativa Japonica Group]
Os03g0769700	0.000104063	2.62549	Cellular Component: intracellular membrane-bounded organelle (GO:0043231);;	--	--	uncharacterized protein LOC4334252 [Oryza sativa Japonica Group]
Os07g0633000	0.936011	-0.0946342	Molecular Function: small molecule binding (GO:0036094);; Cellular Component: intracellular membrane-bounded organelle (GO:0043231);; Molecular Function: organic cyclic compound binding (GO:0097159);;	--	--	hypothetical protein [Oryza sativa Japonica Group]
Os06g0241200	0.812846	-0.323575	Molecular Function: protein kinase activity (GO:0004672);; Biological Process: cellular protein modification process (GO:0006464);; Biological Process: phosphate-containing compound metabolic process (GO:0006796);; Cellular Component: intrinsic component of membrane (GO:0031224);; Molecular Function: purine ribonucleoside binding (GO:0032550);; Cellular Component: intracellular membrane-bounded o…	--	--	Os06g0241200 [Oryza sativa Japonica Group]
Os06g0221100	0.303634	-0.466045	--	--	--	TLD domain-containing protein 2 [Oryza sativa Japonica Group]
Os01g0923600	0.464125	-0.703362	--	K21596|0|osa:4327253|calmodulin-binding transcription activator 4 isoform X1	--	calmodulin-binding transcription activator 4 isoform X1 [Oryza sativa Japonica Group]
Os01g0212400	0.419021	1.13463	--	--	--	sodium/calcium exchanger NCL1 [Oryza sativa Japonica Group]
Os06g0488200	0.546306	-0.309996	--	K10357|0|osa:4341074|myosin-11	--	myosin-11 [Oryza sativa Japonica Group]
Os08g0207600	0.257563	0.665463	Molecular Function: nucleic acid binding (GO:0003676);; Cellular Component: cytoplasm (GO:0005737);; Molecular Function: purine ribonucleoside binding (GO:0032550);; Cellular Component: intracellular membrane-bounded organelle (GO:0043231);;	K03595|0|osa:4344938|GTP-binding protein ERG	--	GTP-binding protein ERG [Oryza sativa Japonica Group]
Os11g0121600	0.668363	0.447904	Biological Process: cellular protein modification process (GO:0006464);; Biological Process: phosphate-containing compound metabolic process (GO:0006796);; Biological Process: cell recognition (GO:0008037);; Molecular Function: kinase activity (GO:0016301);; Cellular Component: intrinsic component of membrane (GO:0031224);; Molecular Function: purine ribonucleoside binding (GO:0032550);;	--	--	Os11g0121600 [Oryza sativa Japonica Group]
Os01g0505700	0.758723	0.323317	--	--	--	Os01g0505700, partial [Oryza sativa Japonica Group]
Os08g0356800	0.938431	0.133082	Cellular Component: intrinsic component of membrane (GO:0031224);;	--	--	uncharacterized protein LOC4345361 [Oryza sativa Japonica Group]
Os01g0898300	0.739962	0.287569	Cellular Component: membrane (GO:0016020);;	K21842|0|osa:4325109|uncharacterized protein LOC4325109	--	uncharacterized protein LOC4325109 [Oryza sativa Japonica Group]
Os10g0559200	0.0931932	-1.62822	--	--	--	PREDICTED: S-norcoclaurine synthase 1-like [Oryza brachyantha]
Os10g0431900	0.228392	-1.03087	Molecular Function: protein kinase activity (GO:0004672);; Biological Process: cellular protein modification process (GO:0006464);; Biological Process: phosphate-containing compound metabolic process (GO:0006796);; Molecular Function: purine ribonucleoside binding (GO:0032550);;	--	--	probable serine/threonine-protein kinase PBL16 [Oryza sativa Japonica Group]
Os02g0723400	0.35841	-1.96259	Molecular Function: protein binding (GO:0005515);; Biological Process: transcription, DNA-templated (GO:0006351);; Biological Process: translation (GO:0006412);; Biological Process: hormone-mediated signaling pathway (GO:0009755);; Cellular Component: intracellular membrane-bounded organelle (GO:0043231);;	K14484|1.43472e-123|osa:4330571|auxin-responsive protein IAA8 isoform X1	Plant hormone signal transduction (ko04075)	auxin-responsive protein IAA8 isoform X1 [Oryza sativa Japonica Group]
Os07g0498400	0.0516586	-1.71978	Molecular Function: protein kinase activity (GO:0004672);; Biological Process: cellular protein modification process (GO:0006464);; Biological Process: phosphate-containing compound metabolic process (GO:0006796);; Biological Process: transport (GO:0006810);; Cellular Component: intrinsic component of membrane (GO:0031224);; Molecular Function: purine ribonucleoside binding (GO:0032550);; Cellula…	--	--	LRR receptor-like serine/threonine-protein kinase GSO1 [Oryza sativa Japonica Group]
Os05g0549800	0.883218	0.222605	Molecular Function: nucleic acid binding transcription factor activity (GO:0001071);; Molecular Function: nucleic acid binding (GO:0003676);; Biological Process: transcription, DNA-templated (GO:0006351);; Cellular Component: intracellular membrane-bounded organelle (GO:0043231);;	K09287|5.25877e-175|osa:4339522|AP2/ERF and B3 domain-containing protein Os05g0549800	--	AP2/ERF and B3 domain-containing protein Os05g0549800 [Oryza sativa Japonica Group]
Os01g0214500	1.55e-14	9.14387	Cellular Component: intrinsic component of membrane (GO:0031224);;	--	--	uncharacterized protein LOC4325256 [Oryza sativa Japonica Group]
Os03g0132200	0.125634	1.06653	--	--	--	expansin-like A1 [Oryza sativa Japonica Group]
Os01g0814800	0.0789721	1.42298	--	K22846|0|osa:4327479|cysteine synthase-like	Cysteine and methionine metabolism (ko00270);; Biosynthesis of amino acids (ko01230)	cysteine synthase-like [Oryza sativa Japonica Group]
Os07g0159500	0.944708	0.0480572	--	--	--	Os07g0159500, partial [Oryza sativa Japonica Group]
Os07g0633100	0.317241	0.558395	--	--	--	Os07g0633100, partial [Oryza sativa Japonica Group]
Os12g0105962	0.37804	0.764605	--	K03178|0|osa:9271171|LOW QUALITY PROTEIN: ubiquitin-activating enzyme E1 2	Ubiquitin mediated proteolysis (ko04120)	LOW QUALITY PROTEIN: ubiquitin-activating enzyme E1 2-like [Oryza sativa Japonica Group]
Os06g0493600	0.99173	0.0158999	--	K24195|0|osa:4341088|phosphate transporter PHO1-3	--	phosphate transporter PHO1-3 [Oryza sativa Japonica Group]
Os02g0231600	0.93036	0.0662446	--	--	--	putative nuclease HARBI1 isoform X2 [Oryza sativa Japonica Group]
Os07g0569500	0.640002	0.685909	--	K21805|2.34117e-102|osa:4343651|protein-lysine methyltransferase METTL21D	--	protein-lysine methyltransferase METTL21D [Oryza sativa Japonica Group]
Os08g0511700	0.532807	0.359538	Biological Process: response to radiation (GO:0009314);;	--	--	Os08g0511700 [Oryza sativa Japonica Group]
Os08g0359000	0.48273	-0.588947	Cellular Component: intrinsic component of membrane (GO:0031224);; Cellular Component: intracellular membrane-bounded organelle (GO:0043231);;	--	--	uncharacterized protein LOC4345365 [Oryza sativa Japonica Group]
Os09g0281900	0.998971	0.000938312	--	K15156|0|osa:4346616|mediator of RNA polymerase II transcription subunit 14 isoform X1	--	mediator of RNA polymerase II transcription subunit 14 isoform X1 [Oryza sativa Japonica Group]
Os12g0407300	0.505207	0.670264	Biological Process: RNA splicing, via transesterification reactions with bulged adenosine as nucleophile (GO:0000377);; Biological Process: developmental process involved in reproduction (GO:0003006);; Biological Process: post-embryonic development (GO:0009791);; Cellular Component: intracellular membrane-bounded organelle (GO:0043231);;	--	--	nuclear intron maturase 1, mitochondrial [Oryza sativa Japonica Group]
Os09g0109500	0.675423	0.206235	--	--	--	protein unc-50 homolog [Oryza sativa Japonica Group]
Os03g0109900	0.225022	-1.02088	Biological Process: DNA metabolic process (GO:0006259);; Molecular Function: transition metal ion binding (GO:0046914);; Molecular Function: organic cyclic compound binding (GO:0097159);;	--	--	Os03g0109900, partial [Oryza sativa Japonica Group]
Os05g0501650	0.0254588	2.15713	Cellular Component: intracellular membrane-bounded organelle (GO:0043231);; Biological Process: response to stimulus (GO:0050896);;	--	--	universal stress protein PHOS32 isoform X2 [Oryza sativa Japonica Group]
Os02g0625500	0.02139	1.06209	Biological Process: purine ribonucleotide biosynthetic process (GO:0009152);; Molecular Function: phosphotransferase activity, alcohol group as acceptor (GO:0016773);; Biological Process: purine-containing compound salvage (GO:0043101);;	--	--	Os02g0625500, partial [Oryza sativa Japonica Group]
Os04g0269800	0.527955	-0.585047	Molecular Function: helicase activity (GO:0004386);; Biological Process: cellular process (GO:0009987);; Cellular Component: intracellular membrane-bounded organelle (GO:0043231);; Molecular Function: organic cyclic compound binding (GO:0097159);; Molecular Function: heterocyclic compound binding (GO:1901363);;	--	--	Os04g0269800 [Oryza sativa Japonica Group]
Os02g0830801	0.873683	-0.0820549	Cellular Component: membrane (GO:0016020);;	--	--	Os02g0830801 [Oryza sativa Japonica Group]
Os05g0160600	0.908906	0.0817845	Cellular Component: intracellular membrane-bounded organelle (GO:0043231);;	--	--	uncharacterized protein LOC4337885 [Oryza sativa Japonica Group]
Os11g0210600	1.26e-05	-4.3217	Molecular Function: catalytic activity (GO:0003824);; Biological Process: single-organism metabolic process (GO:0044710);; Molecular Function: transition metal ion binding (GO:0046914);;	K18857|0|osa:4350055|alcohol dehydrogenase 2	Glycolysis / Gluconeogenesis (ko00010);; Fatty acid degradation (ko00071);; Tyrosine metabolism (ko00350);; alpha-Linolenic acid metabolism (ko00592);; Pyruvate metabolism (ko00620)	hypothetical protein OsJ_33337 [Oryza sativa Japonica Group]
Os03g0247000	0.767131	-0.292578	Molecular Function: hydrolase activity (GO:0016787);; Biological Process: protein metabolic process (GO:0019538);; Molecular Function: purine ribonucleoside binding (GO:0032550);; Cellular Component: intracellular membrane-bounded organelle (GO:0043231);;	--	--	ATP-dependent Clp protease ATP-binding subunit CLPT1, chloroplastic [Oryza sativa Japonica Group]
Os01g0626100	0.949952	0.040114	--	--	--	Os01g0626100 [Oryza sativa Japonica Group]
Os02g0182100	0.438633	-0.516881	Molecular Function: nucleic acid binding transcription factor activity (GO:0001071);; Molecular Function: nucleic acid binding (GO:0003676);; Biological Process: transcription, DNA-templated (GO:0006351);; Biological Process: hormone-mediated signaling pathway (GO:0009755);; Biological Process: intracellular signal transduction (GO:0035556);; Cellular Component: intracellular membrane-bounded org…	K14491|0|osa:4328516|two-component response regulator ORR24	Plant hormone signal transduction (ko04075)	two-component response regulator ORR24 [Oryza sativa Japonica Group]
Os01g0896800	0.0748996	1.07315	--	--	--	Os01g0896800, partial [Oryza sativa Japonica Group]
Os05g0569200	0.331296	0.460211	Cellular Component: intracellular membrane-bounded organelle (GO:0043231);;	--	--	hypothetical protein OsI_21036 [Oryza sativa Indica Group]
Os01g0849500	0.785935	0.211244	Cellular Component: intrinsic component of membrane (GO:0031224);;	--	--	uncharacterized protein LOC4324860 [Oryza sativa Japonica Group]
Os01g0934100	0.642888	0.682849	--	--	--	protein SRC2 [Oryza sativa Japonica Group]
Os02g0627700	0.270997	-0.689683	--	--	--	Os02g0627700 [Oryza sativa Japonica Group]
Os01g0589200	0.70449	0.336859	--	--	--	Os01g0589200 [Oryza sativa Japonica Group]
Os02g0173500	0.702849	-0.194998	--	K00968|0|osa:4328455|choline-phosphate cytidylyltransferase 1	Phosphonate and phosphinate metabolism (ko00440);; Glycerophospholipid metabolism (ko00564)	choline-phosphate cytidylyltransferase 1 [Oryza sativa Japonica Group]
Os09g0386600	0.155947	1.09225	--	--	--	AUGMIN subunit 5 [Oryza sativa Japonica Group]
Os10g0466300	0.180984	0.495746	--	K10599|0|osa:4348844|pre-mRNA-processing factor 19	Spliceosome (ko03040);; Ubiquitin mediated proteolysis (ko04120)	pre-mRNA-processing factor 19 [Oryza sativa Japonica Group]
Os12g0105600	0.626746	0.531314	--	--	--	probable transcription factor RL9 [Oryza sativa Japonica Group]
Os03g0163500	0.82532	0.242109	Biological Process: exocytosis (GO:0006887);; Cellular Component: protein complex (GO:0043234);;	K19985|0|osa:4331721|exocyst complex component SEC15A	--	exocyst complex component SEC15A [Oryza sativa Japonica Group]
Os09g0513000	0.209719	0.800218	--	--	--	Os09g0513000, partial [Oryza sativa Japonica Group]
Os12g0620000	0.954361	0.0926688	Molecular Function: protein kinase activity (GO:0004672);; Biological Process: cellular protein modification process (GO:0006464);; Biological Process: phosphate-containing compound metabolic process (GO:0006796);; Cellular Component: intrinsic component of membrane (GO:0031224);; Molecular Function: purine ribonucleoside binding (GO:0032550);;	--	--	hypothetical protein OsJ_36900 [Oryza sativa Japonica Group]
Os02g0775050	0.711776	-0.318496	--	--	--	metal tolerance protein 3 [Oryza sativa Japonica Group]
Os01g0928000	0.0885613	-1.07986	Molecular Function: protein binding (GO:0005515);;	--	--	transcription factor ICE1-like [Oryza sativa Japonica Group]
Os03g0767900	0.0440789	2.14736	Cellular Component: intrinsic component of membrane (GO:0031224);; Cellular Component: intracellular membrane-bounded organelle (GO:0043231);;	--	--	CASP-like protein 5C1 [Oryza sativa Japonica Group]
Os06g0114400	0.995829	-0.00991529	--	--	--	Os06g0114400, partial [Oryza sativa Japonica Group]
Os03g0675700	0.265603	-1.17531	Cellular Component: intrinsic component of membrane (GO:0031224);;	--	--	Os03g0675700, partial [Oryza sativa Japonica Group]
Os02g0733800	0.238693	0.997117	--	--	--	histone-lysine N-methyltransferase setd3 isoform X1 [Oryza sativa Japonica Group]
Os08g0434100	0.00798191	1.92327	Molecular Function: nucleic acid binding (GO:0003676);; Molecular Function: endoribonuclease activity, producing 3'-phosphomonoesters (GO:0016892);; Biological Process: RNA phosphodiester bond hydrolysis (GO:0090501);;	K01166|3.7545e-148|osa:4345656|extracellular ribonuclease LE	--	extracellular ribonuclease LE [Oryza sativa Japonica Group]
Os01g0500600	0.917631	0.111621	--	--	--	Os01g0500600 [Oryza sativa Japonica Group]
Os10g0467800	0.0174025	3.00027	--	K10999|0|osa:4348853|cellulose synthase A catalytic subunit 7 [UDP-forming]	--	cellulose synthase A catalytic subunit 7 [UDP-forming] [Oryza sativa Japonica Group]
Os05g0499600	0.787673	0.194917	--	--	--	UDP-glycosyltransferase 73C5 [Oryza sativa Japonica Group]
Os01g0896700	0.00133918	1.30193	--	K02932|0|osa:9271934|60S ribosomal protein L5-1	Ribosome (ko03010)	60S ribosomal protein L5-2 [Oryza sativa Japonica Group]
Os01g0506200	0.875315	-0.0984638	--	--	--	tetratricopeptide repeat protein 5 isoform X1 [Oryza sativa Japonica Group]
Os10g0562200	0.891467	0.180958	--	--	--	phospholipase A1-Ibeta2, chloroplastic [Oryza sativa Japonica Group]
Os07g0438550	0.516577	-0.74297	Molecular Function: protein kinase activity (GO:0004672);; Biological Process: cellular protein modification process (GO:0006464);; Biological Process: phosphate-containing compound metabolic process (GO:0006796);; Molecular Function: purine ribonucleoside binding (GO:0032550);;	--	--	Os07g0438550, partial [Oryza sativa Japonica Group]
Os01g0600300	0.164919	0.774443	--	--	--	uncharacterized protein LOC4324595 [Oryza sativa Japonica Group]
Os06g0134300	0.994659	-0.00791851	--	--	--	uncharacterized protein LOC4340029 [Oryza sativa Japonica Group]
Os06g0136100	0.826079	0.160285	Cellular Component: intracellular membrane-bounded organelle (GO:0043231);;	--	--	uncharacterized protein LOC4340039 [Oryza sativa Japonica Group]
Os05g0215300	0.513377	-0.570272	--	K08237|0|osa:9271160|hydroquinone glucosyltransferase	--	hydroquinone glucosyltransferase [Oryza sativa Japonica Group]
Os03g0112700	0.632967	0.555169	Molecular Function: nucleic acid binding (GO:0003676);; Molecular Function: transition metal ion binding (GO:0046914);; Biological Process: short-day photoperiodism, flowering (GO:0048575);;	--	--	zinc finger CCCH domain-containing protein 20 isoform X1 [Oryza sativa Japonica Group]
Os12g0207600	0.740379	-0.308931	Cellular Component: chloroplast (GO:0009507);; Biological Process: carbon fixation (GO:0015977);; Molecular Function: oxidoreductase activity (GO:0016491);; Molecular Function: carboxy-lyase activity (GO:0016831);; Cellular Component: intrinsic component of membrane (GO:0031224);; Molecular Function: small molecule binding (GO:0036094);; Biological Process: cellular metabolic compound salvage (GO…	--	--	Os12g0207600 [Oryza sativa Japonica Group]
Os11g0104400	1.04e-06	-2.73412	Biological Process: fatty acid metabolic process (GO:0006631);; Molecular Function: oxidoreductase activity, acting on paired donors, with incorporation or reduction of molecular oxygen (GO:0016705);; Cellular Component: intrinsic component of membrane (GO:0031224);;	K10257|0|osa:4349544|fatty acid desaturase DES3	--	fatty acid desaturase DES3 [Oryza sativa Japonica Group]
Os02g0175400	0.0709876	2.28352	Biological Process: purine ribonucleotide metabolic process (GO:0009150);; Molecular Function: hydrogen ion transmembrane transporter activity (GO:0015078);; Biological Process: energy coupled proton transmembrane transport, against electrochemical gradient (GO:0015988);; Molecular Function: hydrolase activity, acting on acid anhydrides (GO:0016817);; Molecular Function: purine ribonucleoside bin…	K02145|0|osa:4328470|V-type proton ATPase catalytic subunit A	Oxidative phosphorylation (ko00190);; Phagosome (ko04145)	V-type proton ATPase catalytic subunit A [Oryza sativa Japonica Group]
Os01g0927900	0.994095	0.00622081	Biological Process: cellular amino acid metabolic process (GO:0006520);; Biological Process: phosphate-containing compound metabolic process (GO:0006796);; Molecular Function: phosphotransferase activity, carboxyl group as acceptor (GO:0016774);; Molecular Function: carboxylic acid binding (GO:0031406);; Cellular Component: intracellular membrane-bounded organelle (GO:0043231);;	K00928|0|osa:4326958|aspartokinase 2, chloroplastic isoform X1	Glycine, serine and threonine metabolism (ko00260);; Monobactam biosynthesis (ko00261);; Cysteine and methionine metabolism (ko00270);; Lysine biosynthesis (ko00300);; 2-Oxocarboxylic acid metabolism (ko01210);; Biosynthesis of amino acids (ko01230)	aspartokinase 2, chloroplastic [Oryza sativa Japonica Group]
Os09g0511900	0.924313	-0.320968	--	K01188|0|osa:4347547|probable inactive beta-glucosidase 33	Cyanoamino acid metabolism (ko00460);; Starch and sucrose metabolism (ko00500);; Phenylpropanoid biosynthesis (ko00940)	Os09g0511900, partial [Oryza sativa Japonica Group]
Os08g0357000	0.320172	-0.626337	Molecular Function: hydrolase activity, acting on ester bonds (GO:0016788);; Cellular Component: intracellular membrane-bounded organelle (GO:0043231);; Biological Process: nucleic acid metabolic process (GO:0090304);;	--	--	Os08g0357000, partial [Oryza sativa Japonica Group]
Os02g0224100	0.556846	-0.481186	Molecular Function: phosphoprotein phosphatase activity (GO:0004721);; Biological Process: cellular protein modification process (GO:0006464);; Molecular Function: cation binding (GO:0043169);;	--	--	putative protein phosphatase-2C [Oryza sativa Japonica Group]
Os10g0562100	0.392234	-0.760002	--	--	--	transcription factor MYBS2 [Oryza sativa Japonica Group]
Os07g0631300	0.905925	0.0897829	--	--	--	uncharacterized protein LOC4343998 isoform X1 [Oryza sativa Japonica Group]
Os12g0207500	0.660793	-0.41973	Cellular Component: mitochondrial proton-transporting ATP synthase complex, catalytic core F(1) (GO:0000275);; Biological Process: ATP biosynthetic process (GO:0006754);; Cellular Component: chloroplast thylakoid (GO:0009534);; Biological Process: energy coupled proton transmembrane transport, against electrochemical gradient (GO:0015988);; Molecular Function: cation-transporting ATPase activity …	--	--	Os12g0207500 [Oryza sativa Japonica Group]
Os04g0499500	0.334673	0.785401	Biological Process: pyrimidine nucleotide metabolic process (GO:0006220);; Biological Process: translation (GO:0006412);; Biological Process: Notch signaling pathway (GO:0007219);; Molecular Function: translation factor activity, RNA binding (GO:0008135);; Cellular Component: protein complex (GO:0043234);; Biological Process: transport of virus in multicellular host (GO:0046739);; Biological Proc…	K03260|0|osa:4336300|eukaryotic translation initiation factor isoform 4G-1	RNA transport (ko03013)	eukaryotic translation initiation factor [Oryza sativa Japonica Group]
Os12g0226700	0.209724	-0.718939	Molecular Function: catalytic activity (GO:0003824);; Biological Process: single-organism metabolic process (GO:0044710);; Molecular Function: transition metal ion binding (GO:0046914);;	--	--	2-alkenal reductase (NADP(+)-dependent) [Oryza sativa Japonica Group]
Os06g0688100	0.508316	0.298326	--	K15216|0|osa:4341897|RNA polymerase I-specific transcription initiation factor RRN3 isoform X1	--	RNA polymerase I-specific transcription initiation factor RRN3 isoform X1 [Oryza sativa Japonica Group]
Os07g0113700	0.973831	0.0247934	Biological Process: defense response to bacterium (GO:0042742);; Cellular Component: intracellular membrane-bounded organelle (GO:0043231);; Cellular Component: cytoplasmic part (GO:0044444);;	--	--	suppressor of RPS4-RLD 1 [Oryza sativa Japonica Group]
Os02g0182600	0.0442194	-2.01303	Molecular Function: protein kinase activity (GO:0004672);; Biological Process: cellular protein modification process (GO:0006464);; Biological Process: phosphate-containing compound metabolic process (GO:0006796);; Cellular Component: intrinsic component of membrane (GO:0031224);; Molecular Function: purine ribonucleoside binding (GO:0032550);;	--	--	Os02g0182600 [Oryza sativa Japonica Group]
Os01g0626900	0.00279146	-0.937863	--	--	--	transcription factor bHLH144 [Oryza sativa Japonica Group]
Os06g0700000	0.253705	1.09771	Molecular Function: endopeptidase activity (GO:0004175);; Biological Process: protein metabolic process (GO:0019538);; Cellular Component: external encapsulating structure (GO:0030312);;	--	--	subtilisin-like protease SBT2.6 isoform X1 [Oryza sativa Japonica Group]
Os10g0559700	0.898316	0.0762002	Cellular Component: cell-cell junction (GO:0005911);;	--	--	hypothetical protein OsI_34630 [Oryza sativa Indica Group]
Os03g0135300	0.808401	0.348949	--	K00799|4.80196e-164|osa:4331535|glutathione S-transferase F11	Glutathione metabolism (ko00480)	glutathione S-transferase F11 [Oryza sativa Japonica Group]
Os05g0571400	0.183531	-0.719244	--	--	--	hypothetical protein OsJ_19614 [Oryza sativa Japonica Group]
Os10g0111325	0.929271	0.124799	Biological Process: peptide transport (GO:0015833);; Cellular Component: intrinsic component of membrane (GO:0031224);;	--	--	protein NRT1/ PTR FAMILY 8.3 [Oryza sativa Japonica Group]
Os05g0160200	0.00165068	1.2327	Molecular Function: structural molecule activity (GO:0005198);; Biological Process: gene expression (GO:0010467);; Cellular Component: small ribosomal subunit (GO:0015935);; Molecular Function: cation binding (GO:0043169);; Cellular Component: intracellular membrane-bounded organelle (GO:0043231);;	K02977|3.68721e-89|osa:4337883|ubiquitin-40S ribosomal protein S27a-2	Ribosome (ko03010);; Ubiquitin mediated proteolysis (ko04120)	PREDICTED: ubiquitin-40S ribosomal protein S27a [Oryza brachyantha]
Os04g0542200	0.114883	-1.01054	Biological Process: transport (GO:0006810);; Cellular Component: intrinsic component of membrane (GO:0031224);;	--	--	Os04g0542200, partial [Oryza sativa Japonica Group]
Os07g0655300	0.102117	1.43977	--	K10523|0|osa:4344139|BTB/POZ and MATH domain-containing protein 1	--	BTB/POZ and MATH domain-containing protein 1 [Oryza sativa Japonica Group]
Os01g0273000	0.876226	-0.111255	--	K10881|2.00698e-08|osa:4325173|probable 26S proteasome complex subunit sem1-1	Proteasome (ko03050);; Homologous recombination (ko03440)	protein DELETION OF SUV3 SUPPRESSOR 1(I) [Oryza sativa Japonica Group]
Os08g0508100	0.21348	-0.566136	--	--	--	IRK-interacting protein [Oryza sativa Japonica Group]
Os11g0312400	0.504058	0.396481	Biological Process: nucleotide metabolic process (GO:0009117);; Molecular Function: kinase activity (GO:0016301);; Molecular Function: phosphotransferase activity, phosphate group as acceptor (GO:0016776);; Molecular Function: purine ribonucleoside binding (GO:0032550);; Cellular Component: intracellular part (GO:0044424);;	K00939|4.73745e-172|osa:107276068|adenylate kinase 4	Purine metabolism (ko00230);; Thiamine metabolism (ko00730);; Biosynthesis of cofactors (ko01240)	adenylate kinase 4 [Oryza sativa Japonica Group]
Os06g0335975	8.16e-05	3.56522	Cellular Component: extracellular region (GO:0005576);; Biological Process: cellular glucan metabolic process (GO:0006073);; Molecular Function: transferase activity, transferring hexosyl groups (GO:0016758);; Molecular Function: hydrolase activity, acting on glycosyl bonds (GO:0016798);; Cellular Component: external encapsulating structure (GO:0030312);; Biological Process: cellular component bi…	--	--	Os06g0335975 [Oryza sativa Japonica Group]
Os05g0373900	1.78e-06	6.07922	Molecular Function: translation release factor activity (GO:0003747);; Biological Process: translation (GO:0006412);; Cellular Component: intracellular part (GO:0044424);;	K03265|0|osa:4338603|eukaryotic peptide chain release factor subunit 1-2	mRNA surveillance pathway (ko03015)	eukaryotic peptide chain release factor subunit 1-2 [Oryza sativa Japonica Group]
Os02g0224800	0.915748	0.0806075	Cellular Component: intrinsic component of membrane (GO:0031224);;	--	--	protein NDL1 isoform X1 [Oryza sativa Japonica Group]
Os05g0419100	0.472984	-0.500027	Molecular Function: protein binding (GO:0005515);; Biological Process: transcription, DNA-templated (GO:0006351);; Cellular Component: intrinsic component of membrane (GO:0031224);; Cellular Component: intracellular membrane-bounded organelle (GO:0043231);; Molecular Function: transition metal ion binding (GO:0046914);;	--	--	PHD finger protein ALFIN-LIKE 5 [Oryza sativa Japonica Group]
Os10g0388200	0.799197	-0.157646	--	--	--	F-box/kelch-repeat protein SKIP30 [Oryza sativa Japonica Group]
Os02g0174100	0.0770182	-1.04424	--	--	--	hypothetical protein EE612_009168 [Oryza sativa]
Os02g0831200	0.418235	0.637843	--	--	--	unknown protein [Oryza sativa Japonica Group]
Os08g0510400	0.279867	-0.637961	Molecular Function: catalytic activity (GO:0003824);; Biological Process: single-organism metabolic process (GO:0044710);;	--	--	uncharacterized protein LOC4346000 [Oryza sativa Japonica Group]
Os06g0223700	0.148405	1.74024	--	--	--	hypothetical protein OsI_22207 [Oryza sativa Indica Group]
Os08g0512500	0.222847	-1.05841	Cellular Component: photosystem II (GO:0009523);; Cellular Component: chloroplast thylakoid (GO:0009534);; Biological Process: cellular metabolic process (GO:0044237);; Molecular Function: metal ion binding (GO:0046872);;	--	--	psbP domain-containing protein 3, chloroplastic [Oryza sativa Japonica Group]
Os03g0593100	0.0379464	-1.92362	Molecular Function: nucleotide binding (GO:0000166);; Molecular Function: oxidoreductase activity (GO:0016491);; Cellular Component: intrinsic component of membrane (GO:0031224);; Cellular Component: intracellular membrane-bounded organelle (GO:0043231);; Biological Process: single-organism metabolic process (GO:0044710);;	--	--	uncharacterized protein LOC4333361 [Oryza sativa Japonica Group]
Os02g0829850	0.0414278	-1.37232	Molecular Function: protein binding (GO:0005515);; Cellular Component: plastid (GO:0009536);; Biological Process: actin cytoskeleton organization (GO:0030036);; Cellular Component: protein complex (GO:0043234);;	--	--	uncharacterized protein LOC107280034 isoform X1 [Oryza sativa Japonica Group]
Os01g0590200	0.0376951	0.827292	Cellular Component: intracellular membrane-bounded organelle (GO:0043231);;	--	--	uncharacterized protein LOC4324455 [Oryza sativa Japonica Group]
Os12g0405200	0.796151	-0.170257	Cellular Component: chloroplast envelope (GO:0009941);; Biological Process: carotene metabolic process (GO:0016119);; Molecular Function: cis-trans isomerase activity (GO:0016859);; Cellular Component: intrinsic component of membrane (GO:0031224);;	K15744|0|osa:4352042|15-cis-zeta-carotene isomerase, chloroplastic	Carotenoid biosynthesis (ko00906)	15-cis-zeta-carotene isomerase, chloroplastic [Oryza sativa Japonica Group]
Os01g0383700	8.12e-05	-1.25319	--	K11801|0|osa:9266898|LEC14B protein isoform X1	--	LEC14B homolog isoform X4 [Oryza sativa Japonica Group]
Os02g0175301	0.680698	-0.376108	--	--	--	Os02g0175301 [Oryza sativa Japonica Group]
Os07g0466200	0.481	0.392793	--	--	--	Os07g0466200 [Oryza sativa Japonica Group]
Os01g0934200	0.896394	-0.172883	Biological Process: organic cation transport (GO:0015695);; Cellular Component: intrinsic component of membrane (GO:0031224);; Cellular Component: intracellular membrane-bounded organelle (GO:0043231);;	K15108|0|osa:4326831|mitochondrial thiamine pyrophosphate carrier	--	mitochondrial thiamine diphosphate carrier 2 [Oryza sativa Japonica Group]
Os02g0829500	0.346254	-0.511878	Cellular Component: intracellular membrane-bounded organelle (GO:0043231);;	--	--	uncharacterized protein LOC4331239 isoform X3 [Oryza sativa Japonica Group]
Os08g0510700	0.81209	-0.18585	Molecular Function: nucleic acid binding (GO:0003676);;	--	--	uncharacterized abhydrolase domain-containing protein DDB_G0269086 isoform X1 [Oryza sativa Japonica Group]
Os07g0655400	0.650763	0.532416	Molecular Function: endopeptidase activity (GO:0004175);; Biological Process: protein metabolic process (GO:0019538);; Cellular Component: intrinsic component of membrane (GO:0031224);; Cellular Component: intracellular membrane-bounded organelle (GO:0043231);; Biological Process: Golgi vesicle transport (GO:0048193);;	--	--	rhomboid-like protein 19 [Oryza sativa Japonica Group]
Os01g0931100	0.689137	0.491937	Cellular Component: intrinsic component of membrane (GO:0031224);;	K10532|0|osa:4326815|heparan-alpha-glucosaminide N-acetyltransferase isoform X1	Glycosaminoglycan degradation (ko00531)	heparan-alpha-glucosaminide N-acetyltransferase isoform X1 [Oryza sativa Japonica Group]
Os12g0105700	0.608232	-0.718992	Cellular Component: membrane (GO:0016020);;	K07277|0|osa:4351261|uncharacterized protein LOC4351261	--	uncharacterized protein LOC4351261 [Oryza sativa Japonica Group]
Os03g0248000	0.443235	0.809432	--	K17907|0|osa:4332250|autophagy-related protein 9	Autophagy - other (ko04136)	autophagy-related protein 9 [Oryza sativa Japonica Group]
Os01g0848200	0.00166357	5.18032	Biological Process: proline metabolic process (GO:0006560);; Biological Process: phosphate-containing compound metabolic process (GO:0006796);; Molecular Function: oxidoreductase activity, acting on the aldehyde or oxo group of donors, NAD or NADP as acceptor (GO:0016620);; Molecular Function: phosphotransferase activity, carboxyl group as acceptor (GO:0016774);; Cellular Component: intracellular…	K12657|0|osa:4324853|delta-1-pyrroline-5-carboxylate synthase-like	Arginine and proline metabolism (ko00330);; Biosynthesis of amino acids (ko01230)	delta-1-pyrroline-5-carboxylate synthase 2 [Oryza sativa Japonica Group]
Os06g0487900	0.710128	-0.219686	--	K16287|3.22131e-168|osa:4341072|ubiquitin-like-specific protease 1D isoform X1	--	ubiquitin-like-specific protease 1D isoform X1 [Oryza sativa Japonica Group]
Os08g0360150	0.85485	-0.195473	Biological Process: RNA splicing, via transesterification reactions with bulged adenosine as nucleophile (GO:0000377);; Molecular Function: nucleic acid binding (GO:0003676);; Biological Process: translation (GO:0006412);; Cellular Component: plastid stroma (GO:0009532);;	--	--	RecName: Full=Chloroplastic group IIA intron splicing facilitator CRS1, chloroplastic; AltName: Full=Chloroplastic RNA splicing factor 1; AltName: Full=Protein CHLOROPLAST RNA SPLICING 1; Flags: Precursor
Os01g0816400	0.929863	-0.0634258	Biological Process: protein transport (GO:0015031);; Cellular Component: microtubule cytoskeleton (GO:0015630);;	K16803|0|osa:4327486|protein MOR1 isoform X2	--	protein MOR1 isoform X2 [Oryza sativa Japonica Group]
Os10g0432300	0.932143	-0.0852535	Molecular Function: nucleic acid binding (GO:0003676);; Biological Process: transcription, DNA-templated (GO:0006351);; Cellular Component: intracellular membrane-bounded organelle (GO:0043231);;	K03120|4.86295e-135|osa:4348699|TATA-binding protein 2-like	Basal transcription factors (ko03022)	hypothetical protein OsI_33717 [Oryza sativa Indica Group]
Os01g0386700	0.754376	-0.208325	--	--	--	Os01g0386700, partial [Oryza sativa Japonica Group]
Os10g0430700	0.716184	-0.34962	Cellular Component: membrane (GO:0016020);; Cellular Component: intracellular membrane-bounded organelle (GO:0043231);;	--	--	Os10g0430700, partial [Oryza sativa Japonica Group]
Os05g0134000	0.486307	0.65216	Molecular Function: protein kinase activity (GO:0004672);; Biological Process: cellular protein modification process (GO:0006464);; Biological Process: phosphate-containing compound metabolic process (GO:0006796);; Molecular Function: purine ribonucleoside binding (GO:0032550);;	--	--	Os05g0134000 [Oryza sativa Japonica Group]
Os07g0101500	0.765548	0.26139	--	K14424|0|osa:4342171|methylsterol monooxygenase 2-1	Steroid biosynthesis (ko00100)	methylsterol monooxygenase 2-1 [Oryza sativa Japonica Group]
Os08g0206700	0.527785	0.313975	Molecular Function: nucleic acid binding (GO:0003676);; Cellular Component: intracellular membrane-bounded organelle (GO:0043231);;	--	--	uncharacterized protein LOC4344932 isoform X1 [Oryza sativa Japonica Group]
Os06g0289900	0.452028	-0.615877	--	K23154|0|osa:4340788|UDP-glycosyltransferase 708A6	--	UDP-glucose:2-hydroxyflavanone C-glucosyltransferase [Oryza sativa Japonica Group]
Os05g0354400	0.588542	0.265552	--	--	--	protein trichome birefringence-like 28 [Oryza sativa Japonica Group]
Os01g0922700	0.210443	0.941934	--	--	--	hypothetical protein [Oryza sativa Japonica Group]
Os06g0686600	0.261241	1.06656	--	--	--	uncharacterized protein LOC4341885 [Oryza sativa Japonica Group]
Os07g0669650	0.898312	-0.189452	Cellular Component: intrinsic component of membrane (GO:0031224);; Molecular Function: metal ion transmembrane transporter activity (GO:0046873);; Biological Process: cellular potassium ion transport (GO:0071804);;	--	--	Os07g0669650, partial [Oryza sativa Japonica Group]
Os12g0156400	0.217794	0.665321	--	K12611|0|osa:4351547|mRNA-decapping enzyme-like protein	RNA degradation (ko03018)	mRNA-decapping enzyme-like protein [Oryza sativa Japonica Group]
Os01g0602400	0.0708766	2.06577	--	--	--	cytochrome P450 72A15 [Oryza sativa Japonica Group]
Os05g0145400	0.486149	0.620913	--	--	--	VIN3-like protein 1 [Oryza sativa Japonica Group]
Os01g0849000	0.0055096	3.58726	--	--	--	Os01g0849000, partial [Oryza sativa Japonica Group]
Os05g0551600	0.748284	0.380254	Cellular Component: intracellular membrane-bounded organelle (GO:0043231);;	--	--	COPII coat assembly protein SEC16 [Oryza sativa Japonica Group]
Os03g0590700	0.720978	-0.293627	Cellular Component: intrinsic component of membrane (GO:0031224);; Cellular Component: intracellular membrane-bounded organelle (GO:0043231);;	--	--	nuclear protein E3-3, isoform a, putative, expressed [Oryza sativa Japonica Group]
Os07g0270800	0.554123	0.620161	Cellular Component: intrinsic component of membrane (GO:0031224);;	--	--	hypothetical protein [Oryza sativa Japonica Group]
Os01g0936600	0.967728	-0.0506138	--	--	--	Os01g0936600, partial [Oryza sativa Japonica Group]
Os07g0270950	0.904854	0.139375	Biological Process: protein lipidation (GO:0006497);; Molecular Function: transferase activity (GO:0016740);;	K03857|0|osa:9268920|phosphatidylinositol N-acetylglucosaminyltransferase gpi3 subunit	Glycosylphosphatidylinositol (GPI)-anchor biosynthesis (ko00563)	phosphatidylinositol N-acetylglucosaminyltransferase subunit A [Oryza sativa Japonica Group]
Os08g0433200	0.991124	0.00932539	Biological Process: sphingolipid metabolic process (GO:0006665);; Molecular Function: hydrolase activity, acting on carbon-nitrogen (but not peptide) bonds (GO:0016810);; Cellular Component: intrinsic component of membrane (GO:0031224);;	--	--	uncharacterized protein LOC4345650 [Oryza sativa Japonica Group]
Os01g0357150	0.000212865	-1.43058	Cellular Component: extracellular region (GO:0005576);; Cellular Component: plastid stroma (GO:0009532);; Molecular Function: oxidoreductase activity, acting on other nitrogenous compounds as donors, iron-sulfur protein as acceptor (GO:0016664);; Biological Process: nitrate metabolic process (GO:0042126);; Molecular Function: cation binding (GO:0043169);; Molecular Function: tetrapyrrole binding …	K00366|0|osa:4326014|ferredoxin--nitrite reductase, chloroplastic	Nitrogen metabolism (ko00910)	ferredoxin--nitrite reductase, chloroplastic isoform X2 [Oryza sativa Japonica Group]
Os07g0115500	0.0385875	-1.02631	Cellular Component: intracellular membrane-bounded organelle (GO:0043231);;	--	--	Os07g0115500, partial [Oryza sativa Japonica Group]
Os11g0104800	0.697641	0.22829	--	--	--	protein trichome birefringence-like 28 [Oryza sativa Japonica Group]
Os01g0897300	0.0434292	-1.05541	Molecular Function: nucleic acid binding (GO:0003676);; Molecular Function: endoribonuclease activity, producing 3'-phosphomonoesters (GO:0016892);; Biological Process: RNA phosphodiester bond hydrolysis (GO:0090501);;	K01166|0|osa:4325104|ribonuclease 2	--	ribonuclease 2 [Oryza sativa Japonica Group]
Os12g0105500	0.620335	-0.4321	Biological Process: phosphate-containing compound metabolic process (GO:0006796);; Molecular Function: transferase activity, transferring phosphorus-containing groups (GO:0016772);; Cellular Component: intrinsic component of membrane (GO:0031224);;	K15892|0|osa:4351259|probable phytol kinase 2, chloroplastic	Terpenoid backbone biosynthesis (ko00900)	Os12g0105500, partial [Oryza sativa Japonica Group]
Os10g0442000	0.914575	0.114973	Molecular Function: protein kinase activity (GO:0004672);; Biological Process: cellular protein modification process (GO:0006464);; Biological Process: phosphate-containing compound metabolic process (GO:0006796);; Cellular Component: intrinsic component of membrane (GO:0031224);; Molecular Function: purine ribonucleoside binding (GO:0032550);;	--	--	lectin protein kinase, putative, expressed [Oryza sativa Japonica Group]
Os02g0626100	0.439008	0.924577	Biological Process: L-phenylalanine metabolic process (GO:0006558);; Biological Process: phenylpropanoid biosynthetic process (GO:0009699);; Molecular Function: ammonia-lyase activity (GO:0016841);; Cellular Component: intracellular part (GO:0044424);;	K13064|0|osa:4330034|phenylalanine ammonia-lyase	Phenylalanine metabolism (ko00360);; Phenylpropanoid biosynthesis (ko00940)	phenylalanine ammonia-lyase [Oryza sativa Japonica Group]
Os01g0504100	0.449662	-0.858089	Cellular Component: intrinsic component of membrane (GO:0031224);; Biological Process: establishment of localization (GO:0051234);;	--	--	probable purine permease 4 [Oryza sativa Japonica Group]
Os11g0102700	0.16056	0.98406	Molecular Function: nucleic acid binding transcription factor activity (GO:0001071);; Molecular Function: DNA binding (GO:0003677);; Biological Process: transcription, DNA-templated (GO:0006351);; Molecular Function: cysteine-type peptidase activity (GO:0008234);; Biological Process: protein metabolic process (GO:0019538);;	--	--	Ulp1 protease family, C-terminal catalytic domain containing protein, expressed [Oryza sativa Japonica Group]
Os03g0741100	0.417528	1.54458	Molecular Function: nucleic acid binding (GO:0003676);; Molecular Function: protein binding (GO:0005515);; Biological Process: transcription, DNA-templated (GO:0006351);; Cellular Component: intracellular membrane-bounded organelle (GO:0043231);;	--	--	transcription factor BHLH148 [Oryza sativa Japonica Group]
Os01g0624000	0.0873203	-0.646797	--	K12349|0|osa:4326680|neutral ceramidase	Sphingolipid metabolism (ko00600)	hypothetical protein OsJ_02661 [Oryza sativa Japonica Group]
Os03g0135400	0.298943	-0.476968	Cellular Component: intracellular membrane-bounded organelle (GO:0043231);;	--	--	Putative F-box protein [Oryza sativa Japonica Group]
Os03g0741400	0.995829	0.00470987	Molecular Function: nucleic acid binding transcription factor activity (GO:0001071);; Molecular Function: DNA binding (GO:0003677);; Biological Process: transcription, DNA-templated (GO:0006351);; Cellular Component: intracellular membrane-bounded organelle (GO:0043231);;	--	--	hypothetical protein OsJ_12515 [Oryza sativa Japonica Group]
Os01g0504950	0.245508	1.45268	Molecular Function: carbon-carbon lyase activity (GO:0016830);; Molecular Function: vitamin binding (GO:0019842);; Molecular Function: metal ion binding (GO:0046872);;	--	--	unnamed protein product [Oryza sativa Japonica Group]
Os01g0897000	0.614405	-0.375206	Molecular Function: protein serine/threonine kinase activity (GO:0004674);; Biological Process: cellular protein modification process (GO:0006464);; Biological Process: phosphate-containing compound metabolic process (GO:0006796);; Biological Process: cell cycle (GO:0007049);; Molecular Function: purine ribonucleoside binding (GO:0032550);;	K07760|0|osa:9269568|cyclin-dependent kinase B1-1	--	cyclin-dependent kinase B1-1 [Oryza sativa Japonica Group]
Os04g0600400	0.993949	0.00670472	--	--	--	uncharacterized protein LOC4336876 [Oryza sativa Japonica Group]
Os10g0465700	0.107607	1.97694	Biological Process: polysaccharide metabolic process (GO:0005976);; Molecular Function: amylase activity (GO:0016160);; Cellular Component: intracellular membrane-bounded organelle (GO:0043231);;	K01177|0|osa:4348840|uncharacterized protein LOC4348840	Starch and sucrose metabolism (ko00500)	beta-amylase 1, chloroplastic-like [Oryza sativa Japonica Group]
Os01g0273500	0.926447	0.0882907	Cellular Component: intracellular membrane-bounded organelle (GO:0043231);;	--	--	Os01g0273500, partial [Oryza sativa Japonica Group]
Os04g0252850	0.226943	-0.816898	Cellular Component: chromatin (GO:0000785);; Molecular Function: nucleic acid binding (GO:0003676);; Cellular Component: intrinsic component of membrane (GO:0031224);; Biological Process: nucleosome organization (GO:0034728);; Cellular Component: intracellular membrane-bounded organelle (GO:0043231);;	K11275|2.11782e-41|osa:4335314|histone H1	--	Os04g0253000, partial [Oryza sativa Japonica Group]
Os05g0418800	0.00595009	-0.838339	Molecular Function: nucleic acid binding (GO:0003676);; Biological Process: transcription, DNA-templated (GO:0006351);; Cellular Component: intracellular membrane-bounded organelle (GO:0043231);;	--	--	Os05g0418800, partial [Oryza sativa Japonica Group]
Os06g0685300	0.281152	1.5295	--	--	--	synaptotagmin-3 isoform X1 [Oryza sativa Japonica Group]
Os10g0561300	0.839328	-0.27742	--	K24193|0|osa:4349384|hexose carrier protein HEX6	--	hexose carrier protein HEX6 [Oryza sativa Japonica Group]
Os02g0831500	0.759935	-0.30131	Biological Process: disaccharide metabolic process (GO:0005984);; Molecular Function: UDP-glucosyltransferase activity (GO:0035251);;	--	--	RecName: Full=Sucrose synthase 6; Short=OsSUS6; AltName: Full=Sucrose-UDP glucosyltransferase 6
Os10g0112600	0.393296	-0.528829	--	--	--	transmembrane 9 superfamily member 2 [Oryza sativa Japonica Group]
Os02g0729801	0.819121	-0.23928	Molecular Function: nucleic acid binding transcription factor activity (GO:0001071);; Molecular Function: DNA binding (GO:0003677);; Biological Process: transcription, DNA-templated (GO:0006351);; Cellular Component: intracellular membrane-bounded organelle (GO:0043231);;	K09338|1.6743e-120|osa:4330610|homeobox-leucine zipper protein HOX16 isoform X1	--	homeobox-leucine zipper protein HOX16 isoform X1 [Oryza sativa Japonica Group]
Os09g0512800	0.537329	0.432243	Cellular Component: intracellular membrane-bounded organelle (GO:0043231);;	--	--	DNA repair RAD52-like protein 2, chloroplastic [Oryza sativa Japonica Group]
Os04g0599400	0.608268	0.427022	--	--	--	altered inheritance rate of mitochondria protein 25 [Oryza sativa Japonica Group]
Os12g0456200	0.995829	0.00446972	--	K04082|1.01264e-134|osa:4352172|iron-sulfur cluster co-chaperone protein HscB, mitochondrial	--	iron-sulfur cluster co-chaperone protein HscB, mitochondrial [Oryza sativa Japonica Group]
Os05g0356700	0.00126364	4.12937	--	--	--	protein trichome birefringence-like 33 [Oryza sativa Japonica Group]
Os06g0115500	0.302342	0.735884	--	K02873|2.13288e-128|osa:4339923|60S ribosomal protein L13-1	Ribosome (ko03010)	60S ribosomal protein L13-1 [Oryza sativa Japonica Group]
Os09g0513800	0.146488	1.60209	--	K11968|0|osa:4347561|probable E3 ubiquitin-protein ligase ARI8	--	probable E3 ubiquitin-protein ligase ARI8 [Oryza sativa Japonica Group]
Os04g0599800	0.23999	0.858313	--	K03363|0|osa:4336870|cell division cycle 20.2, cofactor of APC complex isoform X1	Ubiquitin mediated proteolysis (ko04120)	cell division cycle 20.2, cofactor of APC complex isoform X1 [Oryza sativa Japonica Group]
Os03g0766900	0.995829	0.00275522	--	K01723|0|osa:4334233|allene oxide synthase 1, chloroplastic	alpha-Linolenic acid metabolism (ko00592)	allene oxide synthase 1, chloroplastic [Oryza sativa Japonica Group]
Os01g0850000	0.000542213	-1.47512	--	--	--	uncharacterized protein LOC4324862 [Oryza sativa Japonica Group]
Os02g0773300	0.779509	-0.17453	--	K05396|0|osa:4330881|putative D-cysteine desulfhydrase 1, mitochondrial	Cysteine and methionine metabolism (ko00270)	putative D-cysteine desulfhydrase 1, mitochondrial [Oryza sativa Japonica Group]
Os05g0501400	0.000314163	2.48801	Molecular Function: protein kinase activity (GO:0004672);; Biological Process: cellular protein modification process (GO:0006464);; Biological Process: phosphate-containing compound metabolic process (GO:0006796);; Biological Process: cell recognition (GO:0008037);; Cellular Component: intrinsic component of membrane (GO:0031224);; Molecular Function: purine ribonucleoside binding (GO:0032550);;	--	--	receptor-like serine/threonine-protein kinase SD1-8 isoform X1 [Oryza sativa Japonica Group]
Os08g0356500	0.0016615	-2.27718	Cellular Component: intrinsic component of membrane (GO:0031224);;	--	--	uncharacterized protein LOC4345359 [Oryza sativa Japonica Group]
Os08g0304900	0.982126	-0.022151	Molecular Function: oxidized base lesion DNA N-glycosylase activity (GO:0000702);; Molecular Function: DNA binding (GO:0003677);; Molecular Function: endodeoxyribonuclease activity (GO:0004520);; Biological Process: DNA repair (GO:0006281);; Molecular Function: transition metal ion binding (GO:0046914);;	--	--	putative formamidopyrimidine-DNA glycosylase [Oryza sativa Japonica Group]
Os10g0442900	0.527623	0.81851	Molecular Function: nucleoside-triphosphatase activity (GO:0017111);; Cellular Component: intrinsic component of membrane (GO:0031224);; Molecular Function: purine ribonucleoside binding (GO:0032550);;	--	--	ABC transporter family protein, putative, expressed [Oryza sativa Japonica Group]
Os01g0601625	0.296053	-0.828259	--	--	--	receptor-like protein EIX1 [Oryza sativa Japonica Group]
Os05g0355500	0.819121	0.320278	--	K02905|1.27147e-27|osa:4338517|60S ribosomal protein L29-1	Ribosome (ko03010)	60S ribosomal protein L29-1 [Oryza sativa Japonica Group]
Os02g0109501	0.228752	0.916744	--	K15601|0|osa:4328036|lysine-specific demethylase JMJ25	--	lysine-specific demethylase JMJ25 [Oryza sativa Japonica Group]
Os01g0923300	0.946697	0.0494985	Cellular Component: intrinsic component of membrane (GO:0031224);; Cellular Component: intracellular membrane-bounded organelle (GO:0043231);;	--	--	hypothetical protein OsI_04983 [Oryza sativa Indica Group]
