# Supplementary material for: Research on lncRNA related to drought resistance of Shanlan upland rice
Source: BMC Genomics. 2022 Apr 30;23:336. doi: 10.1186/s12864-022-08546-0 (PMC9055766; doi:10.1186/s12864-022-08546-0)
Supplement: Supplementary file 7 — Additional file 7: Table S007. Function annotion of lncRNAs trans-target gene. [file 12864_2022_8546_MOESM7_ESM.xlsx]

## Sheet: CK1_CK2_CK3_vs_D1_D2_D3.target_
Table S007. Function annotion of lncRNAs trans-target gene
#ID	FDR	log2FC	GO_annotation	KEGG_annotation	KEGG_pathway_annotation	NR_annotation
Os03g0344700	0.953639	0.0486026	--	--	--	uncharacterized protein LOC4332809 [Oryza sativa Japonica Group]
Os04g0298200	0.133481	-0.510437	--	K14696|0|osa:9269174|metal tolerance protein C4	--	hypothetical protein OsI_15280 [Oryza sativa Indica Group]
Os09g0248100	0.193372	-2.30165	--	--	--	fasciclin-like arabinogalactan protein 2 [Oryza sativa Japonica Group]
Os03g0728800	0.423574	0.522437	--	K14810|0|osa:4333983|DEAD-box ATP-dependent RNA helicase 16	--	hypothetical protein OsJ_12436 [Oryza sativa Japonica Group]
Os02g0496500	0.291129	0.857844	Biological Process: DNA metabolic process (GO:0006259);; Cellular Component: intracellular membrane-bounded organelle (GO:0043231);; Molecular Function: iron-sulfur cluster binding (GO:0051536);;	--	--	protein ROS1 [Oryza sativa Japonica Group]
Os01g0172200	0.334927	0.973024	--	--	--	DEAD-box ATP-dependent RNA helicase 14 isoform X1 [Oryza sativa Japonica Group]
Os02g0720450	0.113264	0.877656	--	--	--	putative chloroplast nucleoid DNA-binding protein cnd41 [Oryza sativa Japonica Group]
Os07g0454400	0.479756	0.31053	--	K15200|0|osa:9269796|uncharacterized protein LOC9269796 isoform X1	--	uncharacterized protein LOC9269796 [Oryza sativa Japonica Group]
Os06g0198800	0.564509	0.430301	--	K08517|1.32771e-71|osa:9271327|25.3 kDa vesicle transport protein	SNARE interactions in vesicular transport (ko04130);; Phagosome (ko04145)	25.3 kDa vesicle transport protein [Oryza sativa Japonica Group]
Os01g0636400	0.0868277	1.4239	--	--	--	epoxide hydrolase 3 [Oryza sativa Japonica Group]
Os04g0380500	0.00186839	1.00655	--	--	--	uncharacterized protein LOC4335631 [Oryza sativa Japonica Group]
Os02g0818800	0.228392	0.737555	Cellular Component: intracellular membrane-bounded organelle (GO:0043231);;	--	--	pentatricopeptide repeat-containing protein At1g31430 isoform X1 [Oryza sativa Japonica Group]
Os05g0536200	0.455392	0.354524	Molecular Function: voltage-gated ion channel activity (GO:0005244);; Biological Process: anion transport (GO:0006820);; Cellular Component: integral component of membrane (GO:0016021);; Molecular Function: wide pore channel activity (GO:0022829);; Cellular Component: mitochondrial membrane (GO:0031966);; Biological Process: regulation of ion transmembrane transport (GO:0034765);;	K15040|0|osa:4339446|mitochondrial outer membrane protein porin 2	--	mitochondrial outer membrane protein porin 2 [Oryza sativa Japonica Group]
Os03g0147400	0.985453	0.0107523	--	--	--	silicon efflux transporter LSI2-like isoform X1 [Oryza sativa Japonica Group]
Os04g0599900	0.679996	0.259108	--	K12471|0|osa:4336871|clathrin interactor EPSIN 1	Endocytosis (ko04144)	clathrin interactor EPSIN 1 [Oryza sativa Japonica Group]
Os10g0544900	0.195136	1.02288	--	--	--	probable protein phosphatase 2C 72 [Oryza sativa Japonica Group]
Os06g0604400	0.0346971	-1.01638	Molecular Function: phospholipase activity (GO:0004620);; Biological Process: glycerophospholipid metabolic process (GO:0006650);; Molecular Function: metal ion binding (GO:0046872);;	K01115|0|osa:4341469|phospholipase D alpha 2	Glycerophospholipid metabolism (ko00564);; Ether lipid metabolism (ko00565);; Endocytosis (ko04144)	phospholipase D alpha 2 [Oryza sativa Japonica Group]
Os08g0221300	0.00863151	1.01976	--	--	--	Os08g0221300, partial [Oryza sativa Japonica Group]
Os07g0688000	0.637506	0.481663	Molecular Function: pyrophosphatase activity (GO:0016462);; Molecular Function: cation binding (GO:0043169);;	K01517|0|osa:4344352|manganese-dependent ADP-ribose/CDP-alcohol diphosphatase	Purine metabolism (ko00230);; Glycerophospholipid metabolism (ko00564)	manganese-dependent ADP-ribose/CDP-alcohol diphosphatase [Oryza sativa Japonica Group]
Os09g0459500	0.128394	-1.65088	Cellular Component: intrinsic component of membrane (GO:0031224);; Cellular Component: intracellular membrane-bounded organelle (GO:0043231);; Biological Process: steroid hormone mediated signaling pathway (GO:0043401);; Biological Process: primary metabolic process (GO:0044238);;	--	--	Os09g0459450 [Oryza sativa Japonica Group]
Os07g0644100	0.0376951	2.07563	--	--	--	bZIP transcription factor 60 [Oryza sativa Japonica Group]
Os02g0100700	0.235129	0.900901	Biological Process: transcription, DNA-templated (GO:0006351);; Cellular Component: intrinsic component of membrane (GO:0031224);; Molecular Function: cation binding (GO:0043169);; Cellular Component: vacuolar part (GO:0044437);;	--	--	uncharacterized protein LOC4327975 [Oryza sativa Japonica Group]
Os07g0685500	0.19357	-1.26949	--	--	--	probable lysophospholipase BODYGUARD 4 isoform X2 [Oryza sativa Japonica Group]
Os12g0152700	0.213993	1.34217	Cellular Component: plastid stroma (GO:0009532);; Cellular Component: chloroplast thylakoid (GO:0009534);; Molecular Function: carboxylic acid binding (GO:0031406);;	--	--	Os12g0152700, partial [Oryza sativa Japonica Group]
Os07g0646600	0.370774	-0.367394	--	--	--	uncharacterized protein LOC4344104 [Oryza sativa Japonica Group]
Os06g0498800	1.19806e-10	4.33746	--	--	--	protein MOTHER of FT and TFL1 homolog 1 [Oryza sativa Japonica Group]
Os11g0606500	0.225617	1.55128	Molecular Function: purine ribonucleoside binding (GO:0032550);;	--	--	Os11g0606500, partial [Oryza sativa Japonica Group]
Os06g0665500	0.0222427	-1.1152	Biological Process: allantoin metabolic process (GO:0000255);; Biological Process: purine nucleobase metabolic process (GO:0006144);; Biological Process: ureide metabolic process (GO:0010135);; Molecular Function: hydrolase activity, acting on carbon-nitrogen (but not peptide) bonds, in linear amidines (GO:0016813);; Biological Process: protein metabolic process (GO:0019538);; Molecular Function:…	K02083|0|osa:4341777|probable allantoate deiminase	Purine metabolism (ko00230)	probable allantoate deiminase [Oryza sativa Japonica Group]
Os08g0491100	0.0774268	1.00596	Biological Process: cellular protein modification process (GO:0006464);; Molecular Function: kinase activity (GO:0016301);; Molecular Function: purine ribonucleoside binding (GO:0032550);;	--	--	Os08g0491100, partial [Oryza sativa Japonica Group]
Os02g0305600	0.0739439	0.966144	--	--	--	uncharacterized protein LOC4329109 isoform X1 [Oryza sativa Japonica Group]
Os01g0623500	0.639187	0.777849	--	--	--	peroxisomal biogenesis factor 6 [Oryza sativa Japonica Group]
Os07g0523965	0.207928	2.52797	--	--	--	Os07g0523600, partial [Oryza sativa Japonica Group]
Os02g0151400	0.662038	0.188823	--	--	--	uncharacterized protein LOC4328317 [Oryza sativa Japonica Group]
Os04g0657500	0.111767	-1.30639	Molecular Function: catalytic activity (GO:0003824);; Cellular Component: intrinsic component of membrane (GO:0031224);; Biological Process: primary metabolic process (GO:0044238);;	--	--	uncharacterized protein LOC4337262 [Oryza sativa Japonica Group]
Os12g0166500	0.656512	0.482423	Cellular Component: cytoplasm (GO:0005737);;	K14544|0|osa:4351600|nucleolar protein 6	Ribosome biogenesis in eukaryotes (ko03008)	nucleolar protein 6 [Oryza sativa Japonica Group]
Os11g0307550	0.171723	0.95481	--	--	--	hypothetical protein LOC_Os11g20180 [Oryza sativa Japonica Group]
Os03g0133300	0.000190692	4.93683	--	--	--	uncharacterized protein LOC4331522 [Oryza sativa Japonica Group]
Os04g0482300	0.00433694	-2.27611	--	--	--	BTB/POZ and TAZ domain-containing protein 1 isoform X1 [Oryza sativa Japonica Group]
Os03g0710800	0.894396	0.158643	Molecular Function: phospholipase activity (GO:0004620);; Molecular Function: protein binding (GO:0005515);; Biological Process: negative regulation of protein kinase activity (GO:0006469);; Biological Process: serotonin biosynthetic process from tryptophan (GO:0006587);; Biological Process: cellular response to DNA damage stimulus (GO:0006974);; Molecular Function: protein serine/threonine kinas…	K06630|0|osa:4333880|14-3-3-like protein GF14-F isoform X2	--	14-3-3-like protein GF14-F isoform X2 [Oryza sativa Japonica Group]
Os04g0510400	0.625363	0.280478	--	K14805|0|osa:4336370|DEAD-box ATP-dependent RNA helicase 13 isoform X2	--	DEAD-box ATP-dependent RNA helicase 13 isoform X2 [Oryza sativa Japonica Group]
Os02g0511901	0.147671	0.769995	--	--	--	Os02g0511901 [Oryza sativa Japonica Group]
Os09g0494200	0.470499	-0.813923	Molecular Function: hydrolase activity, hydrolyzing O-glycosyl compounds (GO:0004553);; Biological Process: aminoglycan catabolic process (GO:0006026);; Biological Process: cell wall macromolecule metabolic process (GO:0044036);; Biological Process: primary metabolic process (GO:0044238);;	--	--	chitinase-like protein 1 [Oryza sativa Japonica Group]
Os03g0594700	0.0210729	1.0656	--	--	--	uncharacterized protein LOC4333367 isoform X1 [Oryza sativa Japonica Group]
Os03g0308100	0.0758403	0.741109	Molecular Function: endopeptidase activity (GO:0004175);; Biological Process: protein metabolic process (GO:0019538);; Cellular Component: intracellular membrane-bounded organelle (GO:0043231);;	K01358|8.46276e-157|osa:4332615|ATP-dependent Clp protease proteolytic subunit 5, chloroplastic	--	hypothetical protein EE612_016979 [Oryza sativa]
Os10g0446400	0.624945	0.331054	Molecular Function: nucleic acid binding (GO:0003676);; Cellular Component: intracellular membrane-bounded organelle (GO:0043231);;	--	--	Os10g0446400, partial [Oryza sativa Japonica Group]
Os01g0387133	2.79422e-06	2.91909	--	--	--	Os01g0387133, partial [Oryza sativa Japonica Group]
Os05g0459000	0.149275	1.2782	Molecular Function: nucleic acid binding (GO:0003676);;	--	--	Os05g0459000 [Oryza sativa Japonica Group]
Os04g0118450	0.463508	0.419136	--	K03234|0|osa:4334959|elongation factor 2	--	elongation factor 2 [Oryza sativa Japonica Group]
Os02g0306250	0.484612	0.514967	--	--	--	Os02g0306250, partial [Oryza sativa Japonica Group]
Os05g0543600	0.144726	3.33326	Molecular Function: nucleic acid binding (GO:0003676);;	K09422|0|osa:4339490|myb-related protein Hv33	--	myb-related protein Hv33 [Oryza sativa Japonica Group]
Os05g0445900	0.797136	0.282996	Biological Process: DNA repair (GO:0006281);; Molecular Function: hydrolase activity (GO:0016787);; Biological Process: DNA dealkylation (GO:0035510);; Molecular Function: iron-sulfur cluster binding (GO:0051536);;	--	--	RecName: Full=Protein ROS1C; AltName: Full=DNA glycosylase 701; AltName: Full=Protein REPRESSOR OF SILENCING 1 homolog c
Os04g0283900	0.272995	-0.829027	Cellular Component: intracellular membrane-bounded organelle (GO:0043231);;	--	--	unnamed protein product [Oryza sativa Japonica Group]
Os01g0342500	0.683395	0.282209	--	--	--	Os01g0342500, partial [Oryza sativa Japonica Group]
Os05g0361000	0.163947	-0.978793	--	--	--	hypothetical protein EE612_028965 [Oryza sativa]
Os02g0218200	0.261083	0.804005	--	K08776|0|osa:4328737|aminopeptidase M1-A	--	aminopeptidase M1-A [Oryza sativa Japonica Group]
Os03g0297100	0.0496754	0.79312	Molecular Function: structural molecule activity (GO:0005198);; Cellular Component: ribosome (GO:0005840);; Biological Process: gene expression (GO:0010467);; Cellular Component: preribosome (GO:0030684);; Biological Process: ribosome biogenesis (GO:0042254);;	K02993|4.40131e-135|osa:4332545|40S ribosomal protein S7-like	Ribosome (ko03010)	40S ribosomal protein S7-like [Oryza sativa Japonica Group]
Os03g0795800	0.23957	1.45873	Cellular Component: intrinsic component of membrane (GO:0031224);;	K24205|1.14247e-137|osa:4334417|BI1-like protein	--	protein LIFEGUARD 2 [Oryza sativa Japonica Group]
Os03g0278400	0.230265	1.06692	Molecular Function: enzyme activator activity (GO:0008047);; Biological Process: regulation of GTPase activity (GO:0043087);; Cellular Component: intracellular membrane-bounded organelle (GO:0043231);;	K12492|0|osa:4332427|probable ADP-ribosylation factor GTPase-activating protein AGD6	Endocytosis (ko04144)	probable ADP-ribosylation factor GTPase-activating protein AGD6 [Oryza sativa Japonica Group]
Os10g0396300	0.226578	-1.25151	Biological Process: phosphate-containing compound metabolic process (GO:0006796);; Molecular Function: transferase activity, transferring phosphorus-containing groups (GO:0016772);;	--	--	MOB kinase activator-like 1A [Oryza sativa Japonica Group]
Os04g0497600	0.148878	0.798423	Molecular Function: nucleic acid binding (GO:0003676);; Biological Process: gene expression (GO:0010467);; Molecular Function: small molecule binding (GO:0036094);; Cellular Component: intracellular membrane-bounded organelle (GO:0043231);;	--	--	la protein 1 [Oryza sativa Japonica Group]
Os08g0110000	0.00361064	-0.918387	--	--	--	putative methylesterase 14, chloroplastic [Oryza sativa Japonica Group]
Os09g0558250	0.197297	-0.737277	--	--	--	trihelix transcription factor ASIL1 [Oryza sativa Japonica Group]
Os11g0700500	0.106116	1.69558	Molecular Function: nucleic acid binding (GO:0003676);; Biological Process: transcription, DNA-templated (GO:0006351);; Cellular Component: intracellular membrane-bounded organelle (GO:0043231);;	K09422|1.62439e-167|osa:4351184|myb-related protein MYBAS1	--	myb-related protein MYBAS1 isoform X2 [Oryza sativa Japonica Group]
Os11g0153500	0.000621082	-2.34196	--	--	--	protein FAF-like, chloroplastic [Oryza sativa Japonica Group]
Os11g0246200	8.71784e-05	1.6684	--	--	--	F-box/kelch-repeat protein At2g44130 [Oryza sativa Japonica Group]
Os05g0542900	0.469624	0.912003	Molecular Function: hydrolase activity, hydrolyzing O-glycosyl compounds (GO:0004553);; Biological Process: primary metabolic process (GO:0044238);;	--	--	probable polygalacturonase At1g80170 [Oryza sativa Japonica Group]
Os05g0419000	0.455731	-0.604058	--	--	--	pheophytinase, chloroplastic [Oryza sativa Japonica Group]
Os05g0414501	0.222847	1.31717	--	--	--	uncharacterized protein LOC4338796 isoform X2 [Oryza sativa Japonica Group]
Os08g0292000	0.911507	0.100589	Molecular Function: nucleic acid binding (GO:0003676);; Cellular Component: intracellular membrane-bounded organelle (GO:0043231);;	--	--	Os08g0292000, partial [Oryza sativa Japonica Group]
Os06g0192900	0.372819	-0.42955	Molecular Function: nucleotidase activity (GO:0008252);; Biological Process: nucleotide catabolic process (GO:0009166);; Cellular Component: intracellular membrane-bounded organelle (GO:0043231);;	--	--	uncharacterized protein LOC4340378 [Oryza sativa Japonica Group]
Os11g0572500	0.723779	0.336245	Molecular Function: transition metal ion binding (GO:0046914);;	K19043|0|osa:9270248|E3 ubiquitin-protein ligase RHF2A	--	RING-H2 finger protein RHF2a, putative, expressed [Oryza sativa Japonica Group]
Os01g0141900	0.769955	0.187251	--	--	--	Os01g0142000 [Oryza sativa Japonica Group]
Os01g0839700	0.458479	-0.391146	--	K10575|5.30096e-105|osa:4327386|ubiquitin-conjugating enzyme E2 7	Ubiquitin mediated proteolysis (ko04120);; Protein processing in endoplasmic reticulum (ko04141)	ubiquitin-conjugating enzyme E2 7 [Oryza sativa Japonica Group]
Os03g0160900	0.588948	0.339765	--	--	--	Os03g0160900, partial [Oryza sativa Japonica Group]
Os03g0387100	0.613361	0.241794	Molecular Function: endopeptidase activity (GO:0004175);; Cellular Component: proteasome core complex (GO:0005839);; Biological Process: modification-dependent protein catabolic process (GO:0019941);; Cellular Component: intracellular membrane-bounded organelle (GO:0043231);;	K02726|5.75911e-169|osa:4333000|proteasome subunit alpha type-2	Proteasome (ko03050)	proteasome subunit alpha type-2 [Oryza sativa Japonica Group]
Os07g0633600	0.417528	-1.36005	Cellular Component: intrinsic component of membrane (GO:0031224);; Cellular Component: intracellular membrane-bounded organelle (GO:0043231);; Molecular Function: metal ion binding (GO:0046872);;	--	--	hypothetical protein OsI_26994 [Oryza sativa Indica Group]
Os11g0660500	0.0484829	1.35256	Cellular Component: intracellular part (GO:0044424);;	--	--	translationally-controlled tumor protein homolog [Oryza sativa Japonica Group]
Os03g0268250	0.777561	0.348139	Molecular Function: protein kinase activity (GO:0004672);; Biological Process: cellular protein modification process (GO:0006464);; Biological Process: phosphate-containing compound metabolic process (GO:0006796);; Molecular Function: purine ribonucleoside binding (GO:0032550);;	K08269|0|osa:9268534|serine/threonine-protein kinase ATG1c isoform X1	Autophagy - other (ko04136)	hypothetical protein OsJ_10272 [Oryza sativa Japonica Group]
Os05g0510700	0.366039	0.581701	--	--	--	Os05g0510700, partial [Oryza sativa Japonica Group]
Os03g0715400	0.44004	0.725357	--	--	--	protein POLLEN DEFECTIVE IN GUIDANCE 1 isoform X2 [Oryza sativa Japonica Group]
Os07g0155600	0.335045	-0.443628	Biological Process: phosphorelay signal transduction system (GO:0000160);; Molecular Function: catalytic activity (GO:0003824);; Biological Process: response to stress (GO:0006950);; Molecular Function: antioxidant activity (GO:0016209);; Cellular Component: intrinsic component of membrane (GO:0031224);; Molecular Function: cation binding (GO:0043169);; Cellular Component: cell part (GO:0044464);…	K14513|0|osa:4342431|ethylene-insensitive protein 2	MAPK signaling pathway - plant (ko04016);; Plant hormone signal transduction (ko04075)	protein ETHYLENE-INSENSITIVE 2 [Oryza sativa Japonica Group]
Os05g0312000	0.652908	0.372475	--	--	--	mediator of RNA polymerase II transcription subunit 33A [Oryza sativa Japonica Group]
Os02g0260700	0.582962	0.457723	--	--	--	BTB/POZ domain-containing protein POB1 [Oryza sativa Japonica Group]
Os05g0432600	0.60469	0.441018	Cellular Component: intrinsic component of membrane (GO:0031224);;	--	--	hypothetical protein OsI_20077 [Oryza sativa Indica Group]
Os01g0858000	0.367494	-0.415242	--	--	--	Os01g0858000 [Oryza sativa Japonica Group]
Os08g0500200	0.558997	0.451418	--	--	--	pre-mRNA-splicing factor CWC25 homolog [Oryza sativa Japonica Group]
xxx_newGene_8725	0.59949	0.48143	Molecular Function: nucleic acid binding (GO:0003676);; Molecular Function: endopeptidase activity (GO:0004175);; Biological Process: protein metabolic process (GO:0019538);; Molecular Function: DNA polymerase activity (GO:0034061);; Molecular Function: transition metal ion binding (GO:0046914);; Biological Process: DNA biosynthetic process (GO:0071897);;	--	--	hypothetical protein [Oryza sativa Japonica Group]
Os05g0414300	0.437157	0.648818	Molecular Function: purine ribonucleoside binding (GO:0032550);;	--	--	putative disease resistance protein RGA3 [Oryza sativa Japonica Group]
Os01g0971200	0.26459	1.10219	Cellular Component: intrinsic component of membrane (GO:0031224);;	--	--	uncharacterized protein LOC4323844 [Oryza sativa Japonica Group]
Os06g0332900	0.776145	0.263271	Cellular Component: membrane (GO:0016020);; Molecular Function: transition metal ion binding (GO:0046914);;	--	--	Os06g0332900, partial [Oryza sativa Japonica Group]
Os04g0598200	0.00012559	1.71247	--	K02870|4.46788e-112|osa:4336856|60S ribosomal protein L12	Ribosome (ko03010)	hypothetical protein OsI_17237 [Oryza sativa Indica Group]
Os02g0184500	0.672481	0.355195	--	--	--	Os02g0184500 [Oryza sativa Japonica Group]
Os01g0797600	0.790821	0.26673	--	K09286|6.29061e-96|osa:4327621|ethylene-responsive transcription factor 8	--	ethylene-responsive transcription factor 8 [Oryza sativa Japonica Group]
Os02g0617800	0.418235	-0.826384	Cellular Component: intrinsic component of membrane (GO:0031224);;	--	--	Os02g0617800, partial [Oryza sativa Japonica Group]
Os04g0470300	0.985374	-0.0189795	Molecular Function: lipid transporter activity (GO:0005319);; Cellular Component: plastid inner membrane (GO:0009528);; Biological Process: pollen development (GO:0009555);; Biological Process: plant-type cell wall organization (GO:0009664);; Biological Process: gene expression (GO:0010467);; Biological Process: fatty acid transport (GO:0015908);; Cellular Component: intrinsic component of membra…	--	--	protein FATTY ACID EXPORT 1, chloroplastic [Oryza sativa Japonica Group]
Os05g0127500	0.0440789	-1.28009	--	--	--	probable 2-oxoglutarate-dependent dioxygenase At5g05600 [Oryza sativa Japonica Group]
Os07g0456500	0.908978	0.112913	--	--	--	Os07g0456500 [Oryza sativa Japonica Group]
Os06g0196900	0.00692311	1.07128	--	K04078|2.95899e-152|osa:4340394|20 kDa chaperonin, chloroplastic isoform X1	--	20 kDa chaperonin, chloroplastic isoform X1 [Oryza sativa Japonica Group]
Os07g0100300	0.272791	-0.877319	--	K06119|0|osa:4342163|sulfoquinovosyl transferase SQD2	Glycerolipid metabolism (ko00561)	sulfoquinovosyl transferase SQD2 [Oryza sativa Japonica Group]
Os03g0822900	0.0270144	-1.76473	Molecular Function: nucleic acid binding (GO:0003676);; Molecular Function: protein binding (GO:0005515);;	--	--	uncharacterized protein LOC4334613 [Oryza sativa Japonica Group]
Os02g0478700	0.157621	0.71551	--	K02978|2.6092e-45|osa:4329362|40S ribosomal protein S27	Ribosome (ko03010)	hypothetical protein OsI_07209 [Oryza sativa Indica Group]
Os03g0351400	0.000314163	-1.82285	--	--	--	Os03g0351400, partial [Oryza sativa Japonica Group]
Os03g0203700	0.776305	0.599795	--	K01537|0|osa:4331984|calcium-transporting ATPase 2, plasma membrane-type	--	calcium-transporting ATPase 2, plasma membrane-type [Oryza sativa Japonica Group]
Os02g0822450	0.562827	0.41475	--	--	--	Os02g0822400 [Oryza sativa Japonica Group]
Os03g0730400	0.0483799	-1.06207	--	--	--	Serine carboxypeptidase family protein, expressed [Oryza sativa Japonica Group]
Os01g0911200	0.362166	0.362117	--	K12667|0|osa:4324876|dolichyl-diphosphooligosaccharide--protein glycosyltransferase subunit 2	N-Glycan biosynthesis (ko00510);; Various types of N-glycan biosynthesis (ko00513);; Protein processing in endoplasmic reticulum (ko04141)	dolichyl-diphosphooligosaccharide--protein glycosyltransferase subunit 2 [Oryza sativa Japonica Group]
xxx_newGene_7575	0.000233761	2.63732	--	--	--	hypothetical protein OsI_30346 [Oryza sativa Indica Group]
Os07g0160600	0.183564	-1.64491	--	--	--	fasciclin-like arabinogalactan protein 15 [Oryza sativa Japonica Group]
Os12g0527900	0.377132	0.608679	Cellular Component: intracellular membrane-bounded organelle (GO:0043231);;	--	--	pentatricopeptide repeat-containing protein At4g02820, mitochondrial [Oryza sativa Japonica Group]
Os06g0192800	0.0792603	2.81822	Cellular Component: intrinsic component of membrane (GO:0031224);; Molecular Function: transition metal ion binding (GO:0046914);;	--	--	RING-H2 finger protein ATL3 [Oryza sativa Japonica Group]
Os01g0615300	0.754376	0.208984	Molecular Function: transferase activity, transferring acyl groups (GO:0016746);; Cellular Component: intracellular membrane-bounded organelle (GO:0043231);;	--	--	acyl transferase 9-like [Oryza sativa Japonica Group]
Os09g0554000	0.284901	-0.845285	--	K15102|2.55541e-157|osa:4347806|mitochondrial phosphate carrier protein 1, mitochondrial	--	mitochondrial phosphate carrier protein 1, mitochondrial [Oryza sativa Japonica Group]
Os06g0704200	0.222614	-1.06776	--	--	--	uncharacterized protein LOC9268105 isoform X1 [Oryza sativa Japonica Group]
Os01g0114100	0.436983	0.985204	Molecular Function: pattern binding (GO:0001871);; Molecular Function: protein kinase activity (GO:0004672);; Biological Process: cellular protein modification process (GO:0006464);; Biological Process: phosphate-containing compound metabolic process (GO:0006796);; Cellular Component: intrinsic component of membrane (GO:0031224);; Molecular Function: purine ribonucleoside binding (GO:0032550);;	--	--	putative rust resistance kinase Lr10 [Oryza sativa Japonica Group]
Os01g0951000	0.445262	0.301214	--	K15542|0|osa:4325772|flowering time control protein FY	mRNA surveillance pathway (ko03015)	hypothetical protein OsJ_04772 [Oryza sativa Japonica Group]
Os06g0102100	0.136552	-1.5112	--	K23135|0|osa:4339836|3,9-dihydroxypterocarpan 6A-monooxygenase	--	cytochrome P450 93G2-like [Oryza sativa Japonica Group]
Os02g0100100	0.231582	0.875546	--	K09580|0|osa:4327971|protein disulfide isomerase-like 1-4	Protein processing in endoplasmic reticulum (ko04141)	protein disulfide isomerase-like 1-4 [Oryza sativa Japonica Group]
Os01g0305200	0.490114	1.06882	--	--	--	uncharacterized protein LOC4323909 [Oryza sativa Japonica Group]
Os08g0104900	0.162833	1.64776	Cellular Component: intrinsic component of membrane (GO:0031224);; Molecular Function: transition metal ion binding (GO:0046914);;	--	--	UDP-galactose transporter 1 [Oryza sativa Japonica Group]
Os01g0170100	0.478888	0.758439	Molecular Function: organic cyclic compound binding (GO:0097159);;	--	--	uncharacterized protein LOC4327632 isoform X3 [Oryza sativa Japonica Group]
Os03g0218400	0.152197	2.45407	--	K24193|0|osa:4332079|sugar transport protein 13	--	sugar transport protein MST4-like [Oryza sativa Japonica Group]
Os01g0846150	0.0764651	0.860743	Molecular Function: phosphoprotein phosphatase activity (GO:0004721);; Biological Process: cellular protein modification process (GO:0006464);; Cellular Component: intrinsic component of membrane (GO:0031224);; Molecular Function: cation binding (GO:0043169);;	K14497|5.79451e-87|osa:4327465|probable protein phosphatase 2C 9	MAPK signaling pathway - plant (ko04016);; Plant hormone signal transduction (ko04075)	putative protein phosphatase 2C [Oryza sativa Japonica Group]
Os08g0225100	0.306292	0.797117	Cellular Component: intrinsic component of membrane (GO:0031224);;	--	--	Os08g0225100, partial [Oryza sativa Japonica Group]
Os04g0508100	0.161521	0.835828	--	--	--	uncharacterized protein LOC4336352 isoform X2 [Oryza sativa Japonica Group]
Os05g0375400	0.228392	1.18868	--	--	--	lichenase-2 [Oryza sativa Japonica Group]
xxx_newGene_11815	0.852959	0.140556	Cellular Component: mitochondrion (GO:0005739);; Biological Process: respiratory electron transport chain (GO:0022904);; Cellular Component: intrinsic component of membrane (GO:0031224);; Molecular Function: NADH dehydrogenase (quinone) activity (GO:0050136);;	K03879|1.64211e-97|osa:6450140|nad2, OrsajM_p52; NADH dehydrogenase subunit 2	Oxidative phosphorylation (ko00190)	unnamed protein product [Triticum aestivum]
Os03g0242100	0.161325	0.800298	Biological Process: DNA repair (GO:0006281);; Cellular Component: intracellular membrane-bounded organelle (GO:0043231);; Biological Process: single-organism cellular process (GO:0044763);;	K06662|0|osa:4332216|cell cycle checkpoint protein RAD17 isoform X1	--	cell cycle checkpoint protein RAD17 isoform X3 [Oryza sativa Japonica Group]
Os06g0155900	0.811969	0.249057	Cellular Component: intracellular membrane-bounded organelle (GO:0043231);;	--	--	unknown protein [Oryza sativa Japonica Group]
Os11g0202350	0.724962	0.338419	--	--	--	hypothetical protein EE612_054054 [Oryza sativa]
Os06g0684000	0.376255	0.790806	--	K17871|0|osa:4341876|external alternative NAD(P)H-ubiquinone oxidoreductase B1, mitochondrial	--	external alternative NAD(P)H-ubiquinone oxidoreductase B1, mitochondrial [Oryza sativa Japonica Group]
Os04g0461600	0.00867	-1.65167	Cellular Component: membrane (GO:0016020);;	--	--	Os04g0461600, partial [Oryza sativa Japonica Group]
Os04g0525200	0.00111408	-2.78987	--	--	--	hypothetical protein EE612_024513 [Oryza sativa]
Os10g0470900	0.459322	0.356634	Molecular Function: small molecule binding (GO:0036094);; Molecular Function: organic cyclic compound binding (GO:0097159);;	K14411|6.61047e-120|osa:4348867|heterogeneous nuclear ribonucleoprotein 1	mRNA surveillance pathway (ko03015)	heterogeneous nuclear ribonucleoprotein 1 [Oryza sativa Japonica Group]
Os04g0691900	0.445722	0.657985	Molecular Function: kinase activity (GO:0016301);; Molecular Function: purine ribonucleoside binding (GO:0032550);; Biological Process: phosphatidylinositol metabolic process (GO:0046488);;	K00921|0|osa:4337509|1-phosphatidylinositol-3-phosphate 5-kinase FAB1B	Inositol phosphate metabolism (ko00562);; Phosphatidylinositol signaling system (ko04070);; Phagosome (ko04145)	1-phosphatidylinositol-3-phosphate 5-kinase FAB1B [Oryza sativa Japonica Group]
Os01g0848700	0.335453	1.69232	Molecular Function: nucleic acid binding (GO:0003676);; Biological Process: transcription, DNA-templated (GO:0006351);; Molecular Function: purine ribonucleoside binding (GO:0032550);; Biological Process: intracellular signal transduction (GO:0035556);; Cellular Component: cell part (GO:0044464);;	K07904|1.17564e-154|osa:4324856|ras-related protein Rab2BV	Endocytosis (ko04144)	ras-related protein Rab2BV [Oryza sativa Japonica Group]
Os02g0816300	0.231063	-1.18658	--	--	--	CLIP-associated protein isoform X2 [Oryza sativa Japonica Group]
Os02g0586400	0.361636	0.93462	Cellular Component: endoplasmic reticulum-Golgi intermediate compartment (GO:0005793);; Biological Process: protein localization (GO:0008104);; Molecular Function: purine ribonucleoside binding (GO:0032550);; Biological Process: intracellular signal transduction (GO:0035556);; Biological Process: establishment of localization (GO:0051234);;	K07877|4.90038e-141|obr:102709711|ras-related protein Rab-2-B-like	--	PREDICTED: ras-related protein Rab-2-B-like [Oryza brachyantha]
Os11g0242700	0.361679	-0.565104	Molecular Function: structural molecule activity (GO:0005198);; Biological Process: gene expression (GO:0010467);; Cellular Component: intracellular ribonucleoprotein complex (GO:0030529);; Cellular Component: intrinsic component of membrane (GO:0031224);;	--	--	keratin, type I cytoskeletal 14 [Oryza sativa Japonica Group]
Os03g0761900	0.128309	1.44671	Molecular Function: oxidoreductase activity (GO:0016491);; Molecular Function: vitamin binding (GO:0019842);; Cellular Component: intrinsic component of membrane (GO:0031224);; Cellular Component: intracellular membrane-bounded organelle (GO:0043231);; Biological Process: single-organism metabolic process (GO:0044710);; Molecular Function: transition metal ion binding (GO:0046914);;	--	--	putative dioxygenase [Oryza sativa Japonica Group]
Os01g0512200	0.720944	0.226195	Biological Process: vacuole organization (GO:0007033);; Biological Process: endomembrane system organization (GO:0010256);; Biological Process: protein transport (GO:0015031);; Cellular Component: cytoplasmic part (GO:0044444);; Biological Process: response to stimulus (GO:0050896);;	K12396|0|osa:4324036|AP-3 complex subunit delta	--	AP-3 complex subunit delta [Oryza sativa Japonica Group]
Os10g0579600	0.849301	0.220167	Biological Process: peptide transport (GO:0015833);; Cellular Component: intrinsic component of membrane (GO:0031224);;	--	--	protein NRT1/ PTR FAMILY 8.3 [Oryza sativa Japonica Group]
Os04g0644700	0.00605159	2.07752	--	K17268|0|osa:4337189|coatomer subunit epsilon-2 isoform X1	--	coatomer subunit epsilon-2 isoform X1 [Oryza sativa Japonica Group]
Os06g0724300	0.086255	-0.838619	Cellular Component: Golgi apparatus (GO:0005794);; Cellular Component: intrinsic component of membrane (GO:0031224);;	--	--	uncharacterized protein LOC4342099 [Oryza sativa Japonica Group]
Os08g0269700	0.00211012	-3.23993	Cellular Component: membrane (GO:0016020);;	--	--	uncharacterized protein LOC4345134 [Oryza sativa Japonica Group]
Os08g0556000	0.468468	0.730983	Molecular Function: nucleic acid binding (GO:0003676);; Cellular Component: cytoplasm (GO:0005737);;	--	--	uncharacterized protein LOC4346283 [Oryza sativa Japonica Group]
Os04g0636300	0.283899	0.777993	--	--	--	uncharacterized protein LOC9267409 [Oryza sativa Japonica Group]
Os02g0136800	0.782313	0.234455	Cellular Component: intracellular membrane-bounded organelle (GO:0043231);;	--	--	uncharacterized protein LOC4328232 [Oryza sativa Japonica Group]
Os08g0424200	0.218676	1.0376	--	K01969|0|osa:4345605|methylcrotonoyl-CoA carboxylase beta chain, mitochondrial	Valine, leucine and isoleucine degradation (ko00280)	hypothetical protein OsI_29286 [Oryza sativa Indica Group]
Os01g0587000	0.518571	0.48233	Molecular Function: monovalent inorganic cation transmembrane transporter activity (GO:0015077);; Biological Process: energy coupled proton transmembrane transport, against electrochemical gradient (GO:0015988);; Cellular Component: proton-transporting V-type ATPase complex (GO:0033176);;	K02146|0|osa:4327660|probable V-type proton ATPase subunit d	Oxidative phosphorylation (ko00190);; Phagosome (ko04145)	probable V-type proton ATPase subunit d [Oryza sativa Japonica Group]
Os09g0553750	0.683569	-0.310498	--	--	--	uncharacterized protein LOC4347803 [Oryza sativa Japonica Group]
Os03g0826000	0.213481	-1.15882	--	--	--	uncharacterized protein LOC4334637 [Oryza sativa Japonica Group]
Os01g0639900	0.963006	0.0635417	Cellular Component: plastid stroma (GO:0009532);; Molecular Function: hydro-lyase activity (GO:0016836);; Biological Process: single-organism process (GO:0044699);; Molecular Function: transition metal ion binding (GO:0046914);;	K01673|5.25653e-159|osa:4326583|carbonic anhydrase, chloroplastic isoform X1	Nitrogen metabolism (ko00910)	Os01g0639900, partial [Oryza sativa Japonica Group]
Os03g0835900	0.405703	0.492094	--	K02639|1.07036e-94|osa:4334701|ferredoxin-3, chloroplastic	Photosynthesis (ko00195)	ferredoxin-3, chloroplastic [Oryza sativa Japonica Group]
Os02g0204500	0.0168906	-0.766693	--	--	--	uncharacterized protein LOC9266462 isoform X1 [Oryza sativa Japonica Group]
Os05g0574500	0.027095	-0.944894	--	K07936|7.92271e-141|osa:4339683|GTP-binding nuclear protein Ran-2	Ribosome biogenesis in eukaryotes (ko03008);; RNA transport (ko03013)	PREDICTED: GTP-binding nuclear protein Ran-2 [Oryza brachyantha]
Os05g0239100	0.325963	0.876434	Cellular Component: intrinsic component of membrane (GO:0031224);;	--	--	uncharacterized protein LOC107277150 [Oryza sativa Japonica Group]
Os02g0822200	0.146887	1.09114	--	K05610|0|osa:4331185|ubiquitin carboxyl-terminal hydrolase isozyme L5 isoform X1	--	Os02g0822200, partial [Oryza sativa Japonica Group]
Os01g0801000	0.148405	1.00883	Molecular Function: nucleic acid binding (GO:0003676);; Molecular Function: endodeoxyribonuclease activity (GO:0004520);; Biological Process: DNA repair (GO:0006281);; Molecular Function: cation binding (GO:0043169);; Cellular Component: intracellular membrane-bounded organelle (GO:0043231);;	K01142|0|osa:4327960|DNA-(apurinic or apyrimidinic site) lyase, chloroplastic	Base excision repair (ko03410)	DNA-(apurinic or apyrimidinic site) lyase, chloroplastic isoform X2 [Oryza sativa Japonica Group]
Os10g0416800	1.51494e-05	6.08761	--	--	--	chitinase 2 [Oryza sativa Japonica Group]
Os03g0367900	0.124954	1.14532	Cellular Component: cytoplasm (GO:0005737);; Molecular Function: omega peptidase activity (GO:0008242);; Biological Process: protein metabolic process (GO:0019538);;	K01304|6.29838e-161|osa:4332921|pyrrolidone-carboxylate peptidase	--	uncharacterized protein LOC4332921 [Oryza sativa Japonica Group]
Os02g0800100	0.515972	0.474335	--	K11599|1.40998e-97|osa:4331035|cyclin-B1-2-like	Proteasome (ko03050)	cyclin-B1-2-like [Oryza sativa Japonica Group]
Os03g0294700	0.470208	-0.411524	Cellular Component: intracellular membrane-bounded organelle (GO:0043231);;	--	--	Os03g0294700, partial [Oryza sativa Japonica Group]
Os03g0360800	0.414355	0.581834	Molecular Function: nuclease activity (GO:0004518);; Cellular Component: intracellular membrane-bounded organelle (GO:0043231);; Biological Process: nucleic acid metabolic process (GO:0090304);;	--	--	uncharacterized protein LOC107276153 isoform X1 [Oryza sativa Japonica Group]
Os06g0661700	0.806567	0.307395	--	K18469|0|osa:4341748|TBC1 domain family member 5 homolog B isoform X1	--	TBC1 domain family member 5 homolog B isoform X1 [Oryza sativa Japonica Group]
Os04g0541100	0.0564672	2.35456	--	--	--	hypothetical protein OsJ_15631 [Oryza sativa Japonica Group]
Os03g0297700	0.239835	0.631213	Cellular Component: intracellular membrane-bounded organelle (GO:0043231);;	--	--	Os03g0297700, partial [Oryza sativa Japonica Group]
Os12g0141600	0.667413	0.24339	--	--	--	Os12g0141600 [Oryza sativa Japonica Group]
Os10g0148800	0.287819	0.579338	--	--	--	F-box/LRR-repeat protein 4 isoform X2 [Oryza sativa Japonica Group]
Os05g0287800	0.05314	2.30919	Cellular Component: intrinsic component of membrane (GO:0031224);;	--	--	phosphatidylinositol:ceramide inositolphosphotransferase-like [Oryza sativa Japonica Group]
Os07g0108800	0.00294605	4.08048	Cellular Component: plant-type vacuole (GO:0000325);; Molecular Function: voltage-gated potassium channel activity (GO:0005249);; Biological Process: cellular metal ion homeostasis (GO:0006875);; Cellular Component: intrinsic component of membrane (GO:0031224);; Cellular Component: vacuolar part (GO:0044437);; Molecular Function: metal ion binding (GO:0046872);; Biological Process: cellular potas…	K05389|0|osa:4342213|two pore potassium channel b	--	two pore potassium channel b [Oryza sativa Japonica Group]
Os06g0191800	0.256837	-1.55937	--	--	--	Os06g0191800, partial [Oryza sativa Japonica Group]
Os04g0625200	0.00328625	1.7893	Biological Process: phospholipid metabolic process (GO:0006644);; Molecular Function: acylglycerol O-acyltransferase activity (GO:0016411);; Cellular Component: intrinsic component of membrane (GO:0031224);;	--	--	1-acyl-sn-glycerol-3-phosphate acyltransferase [Oryza sativa Japonica Group]
Os03g0761100	0.0338215	2.6964	Molecular Function: phosphoprotein phosphatase activity (GO:0004721);; Biological Process: cellular protein modification process (GO:0006464);; Molecular Function: cation binding (GO:0043169);; Cellular Component: intracellular membrane-bounded organelle (GO:0043231);;	--	--	probable protein phosphatase 2C 34 [Oryza sativa Japonica Group]
Os02g0793000	0.711776	-0.182525	Molecular Function: nucleic acid binding (GO:0003676);; Molecular Function: cation binding (GO:0043169);;	--	--	zinc finger CCCH domain-containing protein 18 [Oryza sativa Japonica Group]
Os11g0530600	5.69426e-05	-2.46424	Biological Process: flavonoid metabolic process (GO:0009812);; Molecular Function: transferase activity, transferring acyl groups other than amino-acyl groups (GO:0016747);;	K00660|0|osa:4350636|chalcone synthase 1	Flavonoid biosynthesis (ko00941);; Circadian rhythm - plant (ko04712)	chalcone synthase 1 [Oryza sativa Japonica Group]
Os01g0593200	0.0999413	1.83901	--	--	--	protein MARD1 isoform X1 [Oryza sativa Japonica Group]
Os12g0580400	0.138257	-0.989395	Biological Process: amino acid transport (GO:0006865);; Biological Process: polyamine transport (GO:0015846);; Cellular Component: intrinsic component of membrane (GO:0031224);; Molecular Function: carboxylic acid transmembrane transporter activity (GO:0046943);;	--	--	probable polyamine transporter At3g19553 [Oryza sativa Japonica Group]
Os02g0787500	0.344876	-0.485408	--	--	--	Os02g0787500, partial [Oryza sativa Japonica Group]
Os03g0809800	0.328534	0.648309	Cellular Component: intracellular membrane-bounded organelle (GO:0043231);; Molecular Function: transition metal ion binding (GO:0046914);;	--	--	Os03g0809800, partial [Oryza sativa Japonica Group]
Os02g0632800	0.0718834	-1.11854	--	--	--	Os02g0632800 [Oryza sativa Japonica Group]
Os12g0230600	0.00216033	2.56658	--	--	--	uncharacterized protein LOC4351830 [Oryza sativa Japonica Group]
Os03g0832600	0.158492	1.27321	--	K18674|0|osa:4334679|galactokinase	--	galactokinase [Oryza sativa Japonica Group]
Os07g0273301	0.00181518	2.64058	--	--	--	Os07g0273301 [Oryza sativa Japonica Group]
Os02g0805600	0.0957422	-0.550132	--	--	--	quinone oxidoreductase PIG3 [Oryza sativa Japonica Group]
Os01g0910500	0.0894918	-1.25878	Cellular Component: intracellular membrane-bounded organelle (GO:0043231);;	--	--	glycine-rich cell wall structural protein 1.8 [Oryza sativa Japonica Group]
Os01g0971100	0.00967744	-1.50188	--	--	--	protein DEHYDRATION-INDUCED 19 homolog 5 [Oryza sativa Japonica Group]
Os02g0567200	0.38125	-0.481203	Molecular Function: phosphoprotein phosphatase activity (GO:0004721);; Biological Process: cellular protein modification process (GO:0006464);; Molecular Function: cation binding (GO:0043169);;	--	--	probable protein phosphatase 2C 15 [Oryza sativa Japonica Group]
Os04g0485400	0.409706	0.530825	--	--	--	cytosolic Fe-S cluster assembly factor NBP35 isoform X1 [Oryza sativa Japonica Group]
Os02g0240300	0.626313	-1.88184	Molecular Function: catalytic activity (GO:0003824);; Biological Process: response to stress (GO:0006950);; Molecular Function: antioxidant activity (GO:0016209);; Biological Process: hydrogen peroxide metabolic process (GO:0042743);; Molecular Function: cation binding (GO:0043169);; Biological Process: single-organism metabolic process (GO:0044710);; Molecular Function: tetrapyrrole binding (GO:…	K00430|0|osa:4328842|peroxidase P7	Phenylpropanoid biosynthesis (ko00940)	peroxidase P7 [Oryza sativa Japonica Group]
Os04g0510500	0.326432	0.963811	Molecular Function: small molecule binding (GO:0036094);; Cellular Component: cell part (GO:0044464);; Biological Process: establishment of localization (GO:0051234);; Molecular Function: organic cyclic compound binding (GO:0097159);;	--	--	putative G3BP-like protein [Oryza sativa Japonica Group]
Os10g0389100	0.0460792	1.93122	Cellular Component: plastid (GO:0009536);; Cellular Component: intrinsic component of membrane (GO:0031224);; Biological Process: single-organism process (GO:0044699);;	K13545|3.149e-65|osa:4348519|red chlorophyll catabolite reductase	Porphyrin and chlorophyll metabolism (ko00860)	Red chlorophyll catabolite reductase, putative [Oryza sativa Japonica Group]
Os01g0783500	8.34417e-05	3.95166	Cellular Component: intracellular membrane-bounded organelle (GO:0043231);; Biological Process: response to stimulus (GO:0050896);;	--	--	universal stress protein PHOS32 [Oryza sativa Japonica Group]
Os10g0495300	0.982991	-0.0149673	--	K12200|0|osa:4348999|ALG-2 interacting protein X	Endocytosis (ko04144)	vacuolar-sorting protein BRO1 [Oryza sativa Japonica Group]
Os11g0216400	0.0189575	1.32605	Cellular Component: intracellular membrane-bounded organelle (GO:0043231);;	--	--	DAG protein, chloroplastic [Oryza sativa Japonica Group]
Os06g0219600	0.219321	1.30012	Molecular Function: small molecule binding (GO:0036094);; Molecular Function: organic cyclic compound binding (GO:0097159);;	K14396|1.4112e-115|osa:4340509|polyadenylate-binding protein 2	mRNA surveillance pathway (ko03015)	polyadenylate-binding protein 2 [Oryza sativa Japonica Group]
Os09g0485050	0.499439	0.507519	--	K14445|0|osa:4347418|tonoplast dicarboxylate transporter	--	tonoplast dicarboxylate transporter [Oryza sativa Japonica Group]
Os01g0332800	0.000961842	-2.03984	--	K16297|0|osa:4326840|serine carboxypeptidase-like 33 isoform X1	--	serine carboxypeptidase-like 26 isoform X1 [Oryza sativa Japonica Group]
xxx_newGene_12566	0.217185	0.78568	Molecular Function: oxidoreductase activity (GO:0016491);; Cellular Component: intrinsic component of membrane (GO:0031224);; Biological Process: single-organism metabolic process (GO:0044710);; Molecular Function: tetrapyrrole binding (GO:0046906);; Molecular Function: transition metal ion binding (GO:0046914);;	--	--	cytochrome P450 94B3 [Oryza sativa Japonica Group]
Os05g0500200	2.93114e-05	2.63856	--	--	--	Os05g0500200 [Oryza sativa Japonica Group]
Os03g0179400	0.00952556	-1.35096	Molecular Function: protein kinase activity (GO:0004672);; Biological Process: cellular protein modification process (GO:0006464);; Biological Process: phosphate-containing compound metabolic process (GO:0006796);; Molecular Function: purine ribonucleoside binding (GO:0032550);;	--	--	serine/threonine-protein kinase RIPK [Oryza sativa Japonica Group]
Os01g0214400	0.149275	0.56649	Cellular Component: intracellular membrane-bounded organelle (GO:0043231);;	--	--	hypothetical protein Zm00014a_000502 [Zea mays]
xxx_newGene_9175	0.417528	0.652489	Cellular Component: intrinsic component of membrane (GO:0031224);;	--	--	uncharacterized protein LOC107278395 [Oryza sativa Japonica Group]
Os09g0553900	0.273696	-0.902516	Biological Process: chloroplast organization (GO:0009658);;	--	--	protein PLASTID MOVEMENT IMPAIRED 1 [Oryza sativa Japonica Group]
Os11g0140600	0.313246	1.19834	--	K13448|1.01847e-129|osa:4349736|probable calcium-binding protein CML49	Plant-pathogen interaction (ko04626)	probable calcium-binding protein CML49 [Oryza sativa Japonica Group]
Os03g0147700	0.172911	0.696322	Biological Process: cellular aromatic compound metabolic process (GO:0006725);; Molecular Function: transferase activity, transferring one-carbon groups (GO:0016741);; Molecular Function: organic cyclic compound binding (GO:0097159);;	--	--	MT-A70 family protein, expressed [Oryza sativa Japonica Group]
Os04g0564700	0.0806514	1.83447	--	--	--	uncharacterized protein LOC9271804 [Oryza sativa Japonica Group]
Os07g0463500	0.431441	-0.62815	--	--	--	acyl-coenzyme A thioesterase 13 [Oryza sativa Japonica Group]
Os10g0555900	0.0271603	-3.77479	Biological Process: reproduction (GO:0000003);; Cellular Component: external encapsulating structure (GO:0030312);; Biological Process: external encapsulating structure organization (GO:0045229);;	--	--	expansin-B3 [Oryza sativa Japonica Group]
Os04g0454600	0.647352	0.33311	Cellular Component: intracellular membrane-bounded organelle (GO:0043231);;	--	--	Os04g0454600, partial [Oryza sativa Japonica Group]
Os11g0425800	0.560106	0.41597	--	--	--	unnamed protein product [Oryza sativa Japonica Group]
Os02g0134000	0.0028343	-1.54529	--	--	--	Os02g0134000, partial [Oryza sativa Japonica Group]
Os02g0708400	0.183145	-0.847715	--	--	--	protein KINESIN LIGHT CHAIN-RELATED 2 [Oryza sativa Japonica Group]
Os03g0748800	0.32933	0.404952	--	K14442|0|osa:4334111|DExH-box ATP-dependent RNA helicase DExH3	RNA degradation (ko03018)	DExH-box ATP-dependent RNA helicase DExH3 [Oryza sativa Japonica Group]
Os05g0554400	0.368899	0.69795	--	--	--	putative phosphatidylserine synthase [Oryza sativa Japonica Group]
Os05g0371600	8.63638e-05	-3.1823	Molecular Function: protein kinase activity (GO:0004672);; Biological Process: cellular protein modification process (GO:0006464);; Biological Process: phosphate-containing compound metabolic process (GO:0006796);; Cellular Component: intrinsic component of membrane (GO:0031224);; Molecular Function: purine ribonucleoside binding (GO:0032550);;	--	--	probable receptor-like protein kinase At2g39360 [Oryza sativa Japonica Group]
Os04g0320700	0.472407	0.647351	--	--	--	Os04g0320700, partial [Oryza sativa Japonica Group]
Os03g0259300	0.475938	0.35283	Cellular Component: intrinsic component of membrane (GO:0031224);; Cellular Component: intracellular membrane-bounded organelle (GO:0043231);;	K14026|0|osa:4332310|ERAD-associated E3 ubiquitin-protein ligase component HRD3	Protein processing in endoplasmic reticulum (ko04141)	ERAD-associated E3 ubiquitin-protein ligase component HRD3 [Oryza sativa Japonica Group]
Os07g0185300	0.377157	0.478421	--	--	--	protein COFACTOR ASSEMBLY OF COMPLEX C SUBUNIT B CCB3, chloroplastic [Oryza sativa Japonica Group]
Os05g0514300	0.231063	0.924717	--	--	--	tubby-like F-box protein 9 [Oryza sativa Japonica Group]
Os10g0166600	0.290935	1.85163	--	--	--	Putative cytochrome P450 [Oryza sativa Japonica Group]
Os03g0638200	5.41415e-09	2.12696	--	--	--	organic cation/carnitine transporter 7 [Oryza sativa Japonica Group]
Os04g0677700	0.137843	-0.947246	Cellular Component: microtubule associated complex (GO:0005875);; Biological Process: microtubule-based process (GO:0007017);; Molecular Function: tubulin binding (GO:0015631);; Cellular Component: intrinsic component of membrane (GO:0031224);;	--	--	Os04g0677700 [Oryza sativa Japonica Group]
Os07g0171200	0.230465	0.98618	Biological Process: positive regulation of cell communication (GO:0010647);; Biological Process: hexose metabolic process (GO:0019318);; Molecular Function: purine ribonucleoside binding (GO:0032550);; Molecular Function: transition metal ion binding (GO:0046914);; Molecular Function: uridylyltransferase activity (GO:0070569);;	--	--	Os07g0171200, partial [Oryza sativa Japonica Group]
Os10g0317300	0.447411	1.31046	Cellular Component: intracellular membrane-bounded organelle (GO:0043231);;	--	--	Os10g0317300 [Oryza sativa Japonica Group]
xxx_newGene_12792	0.617105	0.296462	--	K23309|1.04643e-91|osa:4327428|zinc finger HIT domain-containing protein 3 isoform X1	--	zinc finger HIT domain-containing protein 3 isoform X1 [Oryza sativa Japonica Group]
Os02g0530600	0.00633108	3.89945	--	K10798|0|osa:4329546|poly [ADP-ribose] polymerase 3 isoform X3	Base excision repair (ko03410)	poly [ADP-ribose] polymerase 3 isoform X8 [Oryza sativa Japonica Group]
Os01g0767000	0.167742	-0.714048	--	--	--	Os01g0767000, partial [Oryza sativa Japonica Group]
Os10g0132700	0.5981	0.321471	Molecular Function: purine ribonucleoside binding (GO:0032550);;	--	--	disease resistance protein RPM1, putative, expressed [Oryza sativa Japonica Group]
xxx_newGene_4213	0.1676	1.23035	Cellular Component: intrinsic component of membrane (GO:0031224);;	--	--	P0696G06.5 [Oryza sativa Japonica Group]
Os08g0516600	0.736636	0.227889	--	--	--	predicted GPI-anchored protein 58 [Oryza sativa Japonica Group]
Os06g0342200	0.523354	0.803944	Biological Process: translation (GO:0006412);; Molecular Function: translation factor activity, RNA binding (GO:0008135);;	K03236|1.07886e-69|ats:109747091|LOC109747091; eukaryotic translation initiation factor 1A	RNA transport (ko03013)	eukaryotic translation initiation factor 1A [Aegilops tauschii subsp. tauschii]
Os06g0477400	0.125084	-0.860195	--	--	--	Os06g0477400 [Oryza sativa Japonica Group]
Os06g0707200	0.123352	-1.01972	--	--	--	protein O-linked-mannose beta-1,4-N-acetylglucosaminyltransferase 2 [Oryza sativa Japonica Group]
Os03g0336200	0.393309	1.07146	--	--	--	transcription factor RF2b [Oryza sativa Japonica Group]
Os02g0461200	0.0738517	0.700285	Molecular Function: hydrolase activity, acting on glycosyl bonds (GO:0016798);; Biological Process: primary metabolic process (GO:0044238);;	--	--	uncharacterized protein LOC4329297 [Oryza sativa Japonica Group]
Os02g0330200	0.276259	0.980575	Molecular Function: transferase activity (GO:0016740);; Cellular Component: intrinsic component of membrane (GO:0031224);; Cellular Component: intracellular membrane-bounded organelle (GO:0043231);;	--	--	uncharacterized protein LOC4329205 [Oryza sativa Japonica Group]
Os06g0105350	0.0195545	-2.92102	--	--	--	scarecrow-like protein 6 [Oryza sativa Japonica Group]
Os01g0618100	0.690362	0.483792	--	--	--	probable aldo-keto reductase 1 [Oryza sativa Japonica Group]
Os07g0444650	0.571574	0.441342	Molecular Function: hydrolase activity, hydrolyzing O-glycosyl compounds (GO:0004553);; Biological Process: glucosylceramide metabolic process (GO:0006678);;	K17108|0|osa:9268048|non-lysosomal glucosylceramidase isoform X1	Other glycan degradation (ko00511);; Sphingolipid metabolism (ko00600)	non-lysosomal glucosylceramidase isoform X2 [Oryza sativa Japonica Group]
Os09g0313500	0.0646263	-0.940698	Cellular Component: intrinsic component of membrane (GO:0031224);; Molecular Function: purine ribonucleoside binding (GO:0032550);;	--	--	disease resistance protein RGA2 [Oryza sativa Japonica Group]
Os03g0841900	0.0767088	-1.24723	Molecular Function: catalytic activity (GO:0003824);; Cellular Component: plastid (GO:0009536);; Biological Process: single-organism metabolic process (GO:0044710);;	--	--	Os03g0841900 [Oryza sativa Japonica Group]
Os06g0608300	0.302131	0.409689	--	K12852|0|osa:4341492|116 kDa U5 small nuclear ribonucleoprotein component	Spliceosome (ko03040)	110 kDa U5 small nuclear ribonucleoprotein component CLO [Oryza sativa Japonica Group]
Os01g0928100	0.462343	0.432157	Cellular Component: intracellular membrane-bounded organelle (GO:0043231);;	--	--	coiled-coil domain-containing protein SCD2 [Oryza sativa Japonica Group]
Os01g0787400	0.114091	0.873225	--	--	--	Os01g0787400, partial [Oryza sativa Japonica Group]
Os06g0721600	0.539717	0.471539	--	--	--	Os06g0721600 [Oryza sativa Japonica Group]
CAA33989	0.470288	-0.351901	--	K02967|1.16245e-175|osa:3131442|rps2, OrsajCp018; ribosomal protein S2	Ribosome (ko03010)	ribosomal protein S2 (chloroplast) [Oryza sativa Indica Group]
Os02g0128200	0.29063	-1.02047	Molecular Function: nucleic acid binding transcription factor activity (GO:0001071);; Molecular Function: DNA binding (GO:0003677);; Biological Process: transcription, DNA-templated (GO:0006351);;	K09060|0|osa:4328173|transcription factor HBP-1a	--	transcription factor HBP-1a [Oryza sativa Japonica Group]
Os08g0177700	0.473604	0.291281	--	--	--	Os08g0177700, partial [Oryza sativa Japonica Group]
Os06g0642900	0.166712	1.64371	--	--	--	uncharacterized protein LOC4341635 [Oryza sativa Japonica Group]
Os03g0290300	0.168463	-1.78123	Molecular Function: oxidoreductase activity, acting on paired donors, with incorporation or reduction of molecular oxygen (GO:0016705);; Cellular Component: intrinsic component of membrane (GO:0031224);; Cellular Component: intracellular membrane-bounded organelle (GO:0043231);; Biological Process: primary metabolic process (GO:0044238);; Biological Process: single-organism metabolic process (GO:…	K10257|0|osa:4332500|omega-3 fatty acid desaturase, endoplasmic reticulum	--	omega-3 fatty acid desaturase, endoplasmic reticulum [Oryza sativa Japonica Group]
Os09g0469950	0.0815145	-1.16023	--	--	--	Os09g0469950 [Oryza sativa Japonica Group]
Os10g0545100	0.526698	0.590979	--	--	--	uncharacterized protein LOC4349277 [Oryza sativa Japonica Group]
Os04g0491350	0.98274	0.0167874	Cellular Component: intrinsic component of membrane (GO:0031224);; Biological Process: establishment of localization (GO:0051234);;	--	--	Os04g0491350 [Oryza sativa Japonica Group]
Os10g0469700	0.0176197	-2.36339	Cellular Component: intrinsic component of membrane (GO:0031224);;	--	--	receptor like protein 21 [Oryza sativa Japonica Group]
Os07g0642600	0.000108953	-1.22266	--	--	--	probable mediator of RNA polymerase II transcription subunit 26b [Oryza sativa Japonica Group]
Os02g0595100	0.448419	0.507227	Biological Process: protein glycosylation (GO:0006486);; Molecular Function: acetylglucosaminyltransferase activity (GO:0008375);; Cellular Component: intrinsic component of membrane (GO:0031224);;	--	--	Os02g0595100, partial [Oryza sativa Japonica Group]
Os08g0559200	0.0158024	1.84807	Cellular Component: intracellular ribonucleoprotein complex (GO:0030529);;	K02975|1.43327e-43|osa:4346314|40S ribosomal protein S25-2	Ribosome (ko03010)	ribosomal protein S25 [Zea mays]
Os07g0301200	0.840021	0.127956	--	K14811|0|osa:4342981|DEAD-box ATP-dependent RNA helicase 5	--	Os07g0301200, partial [Oryza sativa Japonica Group]
Os05g0592600	0.536958	0.498522	--	--	--	Os05g0592600 [Oryza sativa Japonica Group]
Os12g0100500	0.0539369	-1.11723	--	--	--	caffeoylshikimate esterase [Oryza sativa Japonica Group]
Os05g0113400	0.0608509	-1.55189	Cellular Component: cytoskeleton (GO:0005856);; Molecular Function: cytoskeletal protein binding (GO:0008092);; Biological Process: actin polymerization or depolymerization (GO:0008154);;	--	--	unknown protein [Oryza sativa Japonica Group]
Os04g0589500	0.0766092	-0.663274	Cellular Component: intracellular membrane-bounded organelle (GO:0043231);;	--	--	Os04g0589500, partial [Oryza sativa Japonica Group]
Os06g0334400	0.322938	0.581786	Molecular Function: protein serine/threonine kinase activity (GO:0004674);; Cellular Component: cytoplasm (GO:0005737);; Biological Process: cellular protein modification process (GO:0006464);; Biological Process: phosphate-containing compound metabolic process (GO:0006796);; Biological Process: cell cycle (GO:0007049);; Biological Process: root morphogenesis (GO:0010015);; Molecular Function: pu…	--	--	cyclin-dependent kinase F-1 [Oryza sativa Japonica Group]
Os03g0125900	0.518457	0.727899	--	--	--	expressed protein [Oryza sativa Japonica Group]
Os07g0639800	0.731747	0.155414	--	K03264|3.30848e-177|osa:4344055|eukaryotic translation initiation factor 6-2	Ribosome biogenesis in eukaryotes (ko03008)	eukaryotic translation initiation factor 6-2 [Oryza sativa Japonica Group]
Os03g0594400	0.0037904	1.28698	--	--	--	sugar transport protein MST2-like [Oryza sativa Japonica Group]
Os12g0112800	0.633071	0.437724	--	--	--	Os12g0112800 [Oryza sativa Japonica Group]
Os04g0514500	0.385268	0.920366	--	--	--	pentatricopeptide repeat-containing protein At3g09040, mitochondrial [Oryza sativa Japonica Group]
Os03g0598800	3.85042e-05	1.57051	--	K02877|8.52457e-126|osa:9266562|60S ribosomal protein L15	Ribosome (ko03010)	60S ribosomal protein L15 [Oryza sativa Japonica Group]
Os10g0489200	0.533339	0.255977	Molecular Function: nucleic acid binding (GO:0003676);; Molecular Function: DNA ligase activity (GO:0003909);; Biological Process: DNA replication (GO:0006260);; Biological Process: DNA ligation (GO:0006266);; Molecular Function: purine ribonucleoside binding (GO:0032550);; Biological Process: cellular response to stress (GO:0033554);; Cellular Component: intracellular membrane-bounded organelle …	K10747|0|osa:4348965|DNA ligase 1	DNA replication (ko03030);; Base excision repair (ko03410);; Nucleotide excision repair (ko03420);; Mismatch repair (ko03430)	DNA ligase 1 [Oryza sativa Japonica Group]
Os02g0536400	0.610546	0.299664	Molecular Function: small molecule binding (GO:0036094);; Cellular Component: intracellular membrane-bounded organelle (GO:0043231);; Molecular Function: organic cyclic compound binding (GO:0097159);;	--	--	serine/arginine-rich splicing factor 4 [Oryza sativa Japonica Group]
Os12g0478200	5.8883e-07	7.04972	Biological Process: developmental process involved in reproduction (GO:0003006);; Biological Process: response to abscisic acid (GO:0009737);; Biological Process: seed germination (GO:0009845);;	--	--	Os12g0478100, partial [Oryza sativa Japonica Group]
Os02g0313400	0.142396	1.24861	--	--	--	apoptosis inhibitor 5-like protein API5 [Oryza sativa Japonica Group]
Os11g0417400	0.0286796	-1.48782	Molecular Function: phosphoprotein phosphatase activity (GO:0004721);; Biological Process: cellular protein modification process (GO:0006464);; Molecular Function: cation binding (GO:0043169);;	--	--	probable protein phosphatase 2C 75 [Oryza sativa Japonica Group]
Os02g0651300	0.213088	0.470195	Molecular Function: protein binding (GO:0005515);; Cellular Component: intrinsic component of membrane (GO:0031224);; Cellular Component: intracellular membrane-bounded organelle (GO:0043231);;	--	--	protein ORANGE, chloroplastic [Oryza sativa Japonica Group]
Os03g0784900	0.227793	1.24303	Biological Process: response to acid chemical (GO:0001101);; Molecular Function: lipid transporter activity (GO:0005319);; Biological Process: lipid transport (GO:0006869);; Molecular Function: lipid binding (GO:0008289);; Molecular Function: ammonium transmembrane transporter activity (GO:0008519);; Biological Process: ammonium transport (GO:0015696);; Biological Process: organic hydroxy compoun…	--	--	accelerated cell death 11 [Oryza sativa Japonica Group]
Os10g0462900	0.00592516	1.35554	Biological Process: protein folding (GO:0006457);; Molecular Function: purine ribonucleoside binding (GO:0032550);; Cellular Component: intracellular membrane-bounded organelle (GO:0043231);;	K04077|0|osa:4348824|chaperonin CPN60-2, mitochondrial	RNA degradation (ko03018)	chaperonin CPN60-2, mitochondrial [Oryza sativa Japonica Group]
Os10g0518200	0.45726	0.592494	Cellular Component: intrinsic component of membrane (GO:0031224);; Molecular Function: cation binding (GO:0043169);; Molecular Function: tetrapyrrole binding (GO:0046906);;	--	--	hypothetical protein OsI_34332 [Oryza sativa Indica Group]
Os03g0140100	0.245458	-0.950913	--	--	--	alkane hydroxylase MAH1 [Oryza sativa Japonica Group]
Os08g0245400	0.0726737	0.82244	--	K19562|0|osa:4345056|bifunctional dethiobiotin synthetase/7,8-diamino-pelargonic acid aminotransferase, mitochondrial	Biotin metabolism (ko00780);; Biosynthesis of cofactors (ko01240)	bifunctional dethiobiotin synthetase/7,8-diamino-pelargonic acid aminotransferase, mitochondrial [Oryza sativa Japonica Group]
Os03g0758900	0.126944	1.79197	Molecular Function: nucleic acid binding transcription factor activity (GO:0001071);; Molecular Function: DNA binding (GO:0003677);; Biological Process: transcription, DNA-templated (GO:0006351);; Cellular Component: intrinsic component of membrane (GO:0031224);; Cellular Component: intracellular membrane-bounded organelle (GO:0043231);;	--	--	uncharacterized protein LOC4334178 [Oryza sativa Japonica Group]
Os09g0563700	0.334334	0.653948	--	--	--	uncharacterized protein LOC4347864 [Oryza sativa Japonica Group]
Os05g0163100	0.698373	0.187549	Molecular Function: protein binding (GO:0005515);; Biological Process: transcription, DNA-templated (GO:0006351);; Cellular Component: intrinsic component of membrane (GO:0031224);; Cellular Component: intracellular membrane-bounded organelle (GO:0043231);; Molecular Function: transition metal ion binding (GO:0046914);;	--	--	PHD finger protein ALFIN-LIKE 1 [Oryza sativa Japonica Group]
Os01g0758400	0.334123	-0.34561	--	--	--	Os01g0758400, partial [Oryza sativa Japonica Group]
Os03g0667800	0.830187	0.201423	--	K02971|3.04033e-55|osa:4333672|40S ribosomal protein S21-like	Ribosome (ko03010)	40S ribosomal protein S21-like [Oryza sativa Japonica Group]
Os02g0780700	0.164929	0.990367	Molecular Function: catalytic activity (GO:0003824);; Biological Process: lipid metabolic process (GO:0006629);;	--	--	uncharacterized protein LOC4330922 [Oryza sativa Japonica Group]
Os02g0745800	0.789631	0.17191	--	--	--	uncharacterized protein LOC4330719 isoform X1 [Oryza sativa Japonica Group]
Os09g0106200	0.338959	0.551019	Cellular Component: viral capsid (GO:0019028);; Molecular Function: small molecule binding (GO:0036094);; Cellular Component: intracellular membrane-bounded organelle (GO:0043231);; Molecular Function: organic cyclic compound binding (GO:0097159);;	--	--	Os09g0106200, partial [Oryza sativa Japonica Group]
Os07g0551400	0.145729	1.13287	Biological Process: response to stimulus (GO:0050896);;	--	--	universal stress protein PHOS32 [Oryza sativa Japonica Group]
Os01g0766200	0.188775	1.16189	--	--	--	Os01g0766200, partial [Oryza sativa Japonica Group]
Os09g0439400	0.530284	0.530755	Molecular Function: hydrolase activity, hydrolyzing O-glycosyl compounds (GO:0004553);; Cellular Component: intrinsic component of membrane (GO:0031224);; Cellular Component: intracellular membrane-bounded organelle (GO:0043231);; Biological Process: primary metabolic process (GO:0044238);; Biological Process: external encapsulating structure organization (GO:0045229);;	--	--	probable polygalacturonase isoform X1 [Oryza sativa Japonica Group]
Os12g0283900	0.0282192	-1.88574	Cellular Component: intracellular membrane-bounded organelle (GO:0043231);;	--	--	pentatricopeptide repeat-containing protein At3g46610 [Oryza sativa Japonica Group]
Os04g0543200	0.475827	0.587241	Molecular Function: small molecule binding (GO:0036094);; Molecular Function: organic cyclic compound binding (GO:0097159);;	--	--	uncharacterized protein LOC4336550 [Oryza sativa Japonica Group]
Os05g0400400	0.189407	0.901687	Cellular Component: mitochondrion (GO:0005739);; Biological Process: proton transport (GO:0015992);; Cellular Component: organelle inner membrane (GO:0019866);; Biological Process: respiratory electron transport chain (GO:0022904);;	K00419|5.98101e-36|osa:4338723|cytochrome b-c1 complex subunit 9	Oxidative phosphorylation (ko00190)	cytochrome b-c1 complex subunit 9 [Oryza sativa Japonica Group]
Os03g0806500	0.769935	0.296613	--	--	--	5&apos;-adenylylsulfate reductase-like 5 [Oryza sativa Japonica Group]
Os12g0503200	0.666856	0.477125	Biological Process: translation (GO:0006412);; Molecular Function: translation factor activity, RNA binding (GO:0008135);; Molecular Function: nucleoside-triphosphatase activity (GO:0017111);; Molecular Function: purine ribonucleoside binding (GO:0032550);;	K03243|0|osa:9270871|eukaryotic translation initiation factor 5B	RNA transport (ko03013)	hypothetical protein OsI_38435 [Oryza sativa Indica Group]
Os05g0302700	0.00689924	1.42404	--	K05863|0|osa:4338353|ADP,ATP carrier protein 1, mitochondrial	--	ADP,ATP carrier protein 1, mitochondrial [Oryza sativa Japonica Group]
Os04g0182200	0.373592	1.42814	--	--	--	1-aminocyclopropane-1-carboxylate oxidase homolog 1 [Oryza sativa Japonica Group]
Os02g0539100	0.230075	-0.512162	--	K09480|0|osa:4329584|digalactosyldiacylglycerol synthase 1, chloroplastic	Glycerolipid metabolism (ko00561)	digalactosyldiacylglycerol synthase 1, chloroplastic [Oryza sativa Japonica Group]
Os09g0571400	0.328238	0.617919	--	K01802|7.76226e-118|osa:4347920|peptidyl-prolyl cis-trans isomerase CYP19-3	--	peptidyl-prolyl cis-trans isomerase CYP19-3 [Oryza sativa Japonica Group]
Os02g0564400	0.345085	-0.607962	Molecular Function: protein binding (GO:0005515);; Biological Process: cellular process (GO:0009987);; Molecular Function: hydrolase activity (GO:0016787);; Molecular Function: purine ribonucleoside binding (GO:0032550);; Cellular Component: intracellular membrane-bounded organelle (GO:0043231);;	--	--	Os02g0564400 [Oryza sativa Japonica Group]
Os06g0309000	0.620335	0.237094	Cellular Component: intracellular membrane-bounded organelle (GO:0043231);; Molecular Function: macromolecular complex binding (GO:0044877);; Molecular Function: transition metal ion binding (GO:0046914);;	--	--	hypothetical protein OsJ_21107 [Oryza sativa Japonica Group]
xxx_newGene_3473	0.633454	0.399165	--	--	--	hypothetical protein OsI_10472 [Oryza sativa Indica Group]
Os09g0444200	0.102737	-0.953924	Molecular Function: transferase activity, transferring acyl groups other than amino-acyl groups (GO:0016747);; Cellular Component: intrinsic component of membrane (GO:0031224);; Biological Process: primary metabolic process (GO:0044238);;	K00679|0|osa:4347190|phospholipid:diacylglycerol acyltransferase 1	Glycerolipid metabolism (ko00561)	Os09g0444200, partial [Oryza sativa Japonica Group]
Os03g0308500	0.12574	1.18426	--	K12835|0|osa:4332617|DEAD-box ATP-dependent RNA helicase 24	Spliceosome (ko03040)	DEAD-box ATP-dependent RNA helicase 24 [Oryza sativa Japonica Group]
Os04g0504800	0.283368	0.863295	Molecular Function: nucleic acid binding (GO:0003676);; Molecular Function: small molecule binding (GO:0036094);; Cellular Component: intracellular part (GO:0044424);;	K13126|0|osa:4336331|polyadenylate-binding protein 2	RNA transport (ko03013);; mRNA surveillance pathway (ko03015);; RNA degradation (ko03018)	polyadenylate-binding protein 2 [Oryza sativa Japonica Group]
Os04g0546400	0.922191	0.0588799	--	K05609|1.36899e-91|osa:4336569|ubiquitin carboxyl-terminal hydrolase isozyme L3 isoform X1	--	Os04g0546400 [Oryza sativa Japonica Group]
Os12g0583000	0.944566	0.0707708	Molecular Function: alpha-1,2-mannosyltransferase activity (GO:0000026);; Biological Process: response to acid chemical (GO:0001101);; Biological Process: protein glycosylation (GO:0006486);; Biological Process: response to stress (GO:0006950);; Cellular Component: intrinsic component of membrane (GO:0031224);; Biological Process: cell wall biogenesis (GO:0042546);; Cellular Component: intracellu…	--	--	Os12g0583000, partial [Oryza sativa Japonica Group]
Os03g0292100	0.28327	0.967014	Molecular Function: phosphoprotein phosphatase activity (GO:0004721);; Biological Process: cellular protein modification process (GO:0006464);; Cellular Component: intrinsic component of membrane (GO:0031224);; Molecular Function: cation binding (GO:0043169);; Cellular Component: intracellular membrane-bounded organelle (GO:0043231);;	K17506|0|osa:4332509|probable protein phosphatase 2C 32	--	probable protein phosphatase 2C 32 [Oryza sativa Japonica Group]
Os02g0783100	0.0764213	0.833944	Molecular Function: DNA binding (GO:0003677);; Biological Process: transcription, DNA-templated (GO:0006351);; Cellular Component: intracellular membrane-bounded organelle (GO:0043231);;	K15032|0|osa:4330939|uncharacterized protein LOC4330939	--	transcription termination factor MTERF4, chloroplastic-like [Oryza sativa Japonica Group]
Os07g0615400	0.354414	0.69726	Molecular Function: nucleic acid binding (GO:0003676);; Molecular Function: small molecule binding (GO:0036094);;	K13201|0|osa:4343900|oligouridylate-binding protein 1	--	oligouridylate-binding protein 1 [Oryza sativa Japonica Group]
Os06g0157125	0.438834	-1.02572	Molecular Function: hydrolase activity (GO:0016787);;	--	--	GDSL esterase/lipase At5g45910 [Oryza sativa Japonica Group]
Os11g0448000	0.200385	1.0882	Molecular Function: protein kinase activity (GO:0004672);; Biological Process: cellular protein modification process (GO:0006464);; Biological Process: phosphate-containing compound metabolic process (GO:0006796);; Cellular Component: intrinsic component of membrane (GO:0031224);; Molecular Function: purine ribonucleoside binding (GO:0032550);;	--	--	Os11g0448000 [Oryza sativa Japonica Group]
Os10g0411700	0.000559569	1.32337	--	--	--	Os10g0411700, partial [Oryza sativa Japonica Group]
Os10g0462300	0.510897	-0.432431	Cellular Component: intrinsic component of membrane (GO:0031224);;	--	--	Os10g0462300, partial [Oryza sativa Japonica Group]
Os01g0951400	0.159367	1.29692	--	K13421|0|osa:4325740|uridine 5'-monophosphate synthase	Pyrimidine metabolism (ko00240);; Biosynthesis of cofactors (ko01240)	uridine 5&apos;-monophosphate synthase [Oryza sativa Japonica Group]
Os05g0316800	0.112326	1.06468	Molecular Function: nucleic acid binding transcription factor activity (GO:0001071);; Molecular Function: nucleic acid binding (GO:0003676);; Biological Process: transcription, DNA-templated (GO:0006351);; Cellular Component: intracellular membrane-bounded organelle (GO:0043231);;	--	--	ethylene-responsive transcription factor 3 [Oryza sativa Japonica Group]
Os04g0380000	0.000212865	1.51903	Cellular Component: intrinsic component of membrane (GO:0031224);;	--	--	Os04g0380000 [Oryza sativa Japonica Group]
Os03g0249100	0.168411	-0.8504	--	--	--	IRK-interacting protein [Oryza sativa Japonica Group]
Os05g0425700	0.0854715	1.73747	--	K03875|0|osa:4338850|F-box protein SKP2A	Ubiquitin mediated proteolysis (ko04120)	F-box protein SKP2A [Oryza sativa Japonica Group]
Os05g0581700	0.0126879	0.958593	Cellular Component: intrinsic component of membrane (GO:0031224);; Cellular Component: intracellular membrane-bounded organelle (GO:0043231);;	--	--	uncharacterized protein LOC4339728 [Oryza sativa Japonica Group]
Os01g0949700	0.496087	-0.70141	--	K00799|1.69087e-156|osa:4325763|probable glutathione S-transferase	Glutathione metabolism (ko00480)	probable glutathione S-transferase [Oryza sativa Japonica Group]
Os10g0498300	0.0122034	-1.6228	--	--	--	Os10g0498300, partial [Oryza sativa Japonica Group]
Os11g0528400	2.85052e-05	-1.80269	Cellular Component: intrinsic component of membrane (GO:0031224);;	--	--	uncharacterized protein LOC4350630 [Oryza sativa Japonica Group]
Os03g0179000	0.29974	0.88449	Molecular Function: catalytic activity (GO:0003824);; Biological Process: transcription, DNA-templated (GO:0006351);; Cellular Component: plastid (GO:0009536);; Biological Process: protein modification process (GO:0036211);; Molecular Function: transition metal ion binding (GO:0046914);;	--	--	Tubulin-tyrosine ligase family protein, expressed [Oryza sativa Japonica Group]
Os03g0352300	0.0264109	1.36203	--	K14564|0|osa:4332851|nucleolar protein 56	Ribosome biogenesis in eukaryotes (ko03008)	hypothetical protein EE612_017426 [Oryza sativa]
Os02g0173000	0.0484209	2.63248	--	--	--	Os02g0173000, partial [Oryza sativa Japonica Group]
Os08g0542300	0.439761	0.679903	--	--	--	hypothetical protein [Oryza sativa Japonica Group]
Os09g0252800	0.660504	0.354864	--	--	--	hypothetical protein OsJ_28543 [Oryza sativa Japonica Group]
Os02g0689000	0.00212889	2.90601	--	--	--	putative invertase inhibitor [Oryza sativa Japonica Group]
Os10g0553300	0.217584	1.04095	Biological Process: trehalose metabolic process (GO:0005991);; Biological Process: phosphate-containing compound metabolic process (GO:0006796);; Molecular Function: carbohydrate phosphatase activity (GO:0019203);; Cellular Component: intrinsic component of membrane (GO:0031224);;	K01087|0|osa:4349333|probable trehalose-phosphate phosphatase 2	Starch and sucrose metabolism (ko00500)	hypothetical protein OsI_34594 [Oryza sativa Indica Group]
Os01g0862300	0.445154	0.563357	--	K17917|0|osa:4324745|sorting nexin 1	Endocytosis (ko04144)	sorting nexin 1 [Oryza sativa Japonica Group]
Os03g0843800	0.000237403	-3.44739	Biological Process: metabolic process (GO:0008152);; Molecular Function: methyltransferase activity (GO:0008168);;	K21552|7.945e-154|osa:4334753|probable thiol methyltransferase 2	--	probable thiol methyltransferase 2 [Oryza sativa Japonica Group]
Os06g0103600	0.462537	0.471511	--	K14164|0|osa:4339847|glycine--tRNA ligase, chloroplastic/mitochondrial 2 isoform X1	Aminoacyl-tRNA biosynthesis (ko00970)	glycine--tRNA ligase, chloroplastic/mitochondrial 2 isoform X1 [Oryza sativa Japonica Group]
Os08g0102100	0.229712	0.789109	--	--	--	nicalin isoform X1 [Oryza sativa Japonica Group]
Os06g0166200	0.67173	0.557049	--	--	--	uncharacterized protein LOC4340243 [Oryza sativa Japonica Group]
Os02g0532800	0.000853191	-1.2791	--	--	--	uncharacterized protein LOC4329552 [Oryza sativa Japonica Group]
xxx_newGene_7685	0.224337	-0.72716	--	--	--	65-kDa microtubule-associated protein 1 isoform X1 [Oryza sativa Japonica Group]
Os06g0554300	0.389254	-1.36606	Cellular Component: intrinsic component of membrane (GO:0031224);; Cellular Component: intracellular membrane-bounded organelle (GO:0043231);;	--	--	dentin sialophosphoprotein [Oryza sativa Japonica Group]
Os03g0775300	0.0473335	0.762335	Molecular Function: catalytic activity (GO:0003824);; Biological Process: tRNA metabolic process (GO:0006399);; Molecular Function: ribonucleotide binding (GO:0032553);; Molecular Function: cation binding (GO:0043169);; Cellular Component: intracellular membrane-bounded organelle (GO:0043231);; Biological Process: single-organism metabolic process (GO:0044710);; Molecular Function: iron-sulfur cl…	--	--	Os03g0775300 [Oryza sativa Japonica Group]
Os06g0498500	0.315872	0.443088	--	K14834|0|osa:4341106|nucleolar complex protein 3 homolog	--	nucleolar complex protein 3 homolog [Oryza sativa Japonica Group]
Os04g0483200	0.037675	0.909447	--	--	--	uncharacterized membrane protein At3g27390 isoform X1 [Oryza sativa Japonica Group]
Os03g0659266	0.186118	-0.740396	Molecular Function: RNA binding (GO:0003723);; Molecular Function: structural molecule activity (GO:0005198);; Cellular Component: photosystem II (GO:0009523);; Cellular Component: plastid envelope (GO:0009526);; Cellular Component: chloroplast thylakoid (GO:0009534);; Biological Process: gene expression (GO:0010467);; Biological Process: electron transport chain (GO:0022900);; Cellular Component…	K02708|3.43484e-20|zma:845204|psbF, ZemaCp039; photosystem II protein VI	Photosynthesis (ko00195)	photosystem II protein VI (plastid) [Euphronia guianensis]
Os11g0166800	0.0628422	-1.12889	--	--	--	Os11g0166800, partial [Oryza sativa Japonica Group]
Os11g0599200	7.75959e-06	-5.90458	Biological Process: flavonoid metabolic process (GO:0009812);; Molecular Function: UDP-glucosyltransferase activity (GO:0035251);;	K08237|0|osa:9266321|UDP-glycosyltransferase 72B3	--	UDP-glycosyltransferase 72B3 [Oryza sativa Japonica Group]
Os04g0101300	0.428402	-0.816114	--	--	--	Os04g0101300 [Oryza sativa Japonica Group]
Os09g0448200	0.135602	-1.12399	Cellular Component: intrinsic component of membrane (GO:0031224);; Molecular Function: metal ion transmembrane transporter activity (GO:0046873);; Biological Process: cellular potassium ion transport (GO:0071804);;	--	--	Os09g0448200, partial [Oryza sativa Japonica Group]
Os08g0200500	0.189096	-1.69743	--	--	--	cold-responsive protein kinase 1 [Oryza sativa Japonica Group]
Os11g0456300	0.965248	0.0374647	Biological Process: modification-dependent protein catabolic process (GO:0019941);;	K03094|2.15211e-23|peq:110029095|SKP1-like protein 1B	Ubiquitin mediated proteolysis (ko04120);; Protein processing in endoplasmic reticulum (ko04141)	Os11g0456300, partial [Oryza sativa Japonica Group]
Os11g0470500	0.0073017	-1.90297	--	--	--	putative receptor-like protein kinase At4g00960 [Oryza sativa Japonica Group]
Os01g0250600	0.0286796	1.01177	Cellular Component: intrinsic component of membrane (GO:0031224);;	--	--	uncharacterized protein LOC4327100 isoform X2 [Oryza sativa Japonica Group]
Os08g0169700	0.37147	0.600197	Cellular Component: intracellular membrane-bounded organelle (GO:0043231);;	--	--	thyroid adenoma-associated protein homolog [Oryza sativa Japonica Group]
Os06g0528700	0.102116	-1.81521	--	--	--	flavin-containing monooxygenase FMO GS-OX-like 9 [Oryza sativa Japonica Group]
Os06g0147800	0.74881	0.456413	--	K20603|0|osa:4340126|mitogen-activated protein kinase kinase 2	MAPK signaling pathway - plant (ko04016)	mitogen-activated protein kinase kinase 2 [Oryza sativa Japonica Group]
Os02g0578400	0.129731	-0.977054	Molecular Function: electron carrier activity (GO:0009055);; Cellular Component: photosystem II (GO:0009523);; Cellular Component: chloroplast thylakoid (GO:0009534);; Biological Process: electron transport chain (GO:0022900);; Molecular Function: metal ion binding (GO:0046872);;	K08901|1.48542e-78|osa:4329766|photosynthetic NDH subunit of lumenal location 2, chloroplastic	Photosynthesis (ko00195)	photosynthetic NDH subunit of lumenal location 2, chloroplastic [Oryza sativa Japonica Group]
Os03g0701400	0.361355	0.720712	Cellular Component: intrinsic component of membrane (GO:0031224);;	--	--	pentatricopeptide repeat-containing protein At2g13600 isoform X1 [Oryza sativa Japonica Group]
Os01g0317500	0.0474046	-1.5321	--	--	--	phospholipase-like protein [Oryza sativa Japonica Group]
Os04g0634700	0.00454088	-0.949592	Molecular Function: protein kinase activity (GO:0004672);; Biological Process: cellular protein modification process (GO:0006464);; Biological Process: phosphate-containing compound metabolic process (GO:0006796);; Biological Process: G-protein coupled receptor signaling pathway (GO:0007186);; Biological Process: cell recognition (GO:0008037);; Cellular Component: intrinsic component of membrane …	K00901|0|osa:4337126|diacylglycerol kinase 5 isoform X1	Glycerolipid metabolism (ko00561);; Glycerophospholipid metabolism (ko00564);; Phosphatidylinositol signaling system (ko04070)	diacylglycerol kinase 5 isoform X1 [Oryza sativa Japonica Group]
Os04g0119200	0.405892	0.69456	Cellular Component: intracellular membrane-bounded organelle (GO:0043231);;	--	--	Os04g0119200, partial [Oryza sativa Japonica Group]
Os05g0215000	0.0803534	1.69655	--	--	--	RecName: Full=BURP domain-containing protein 1; Short=OsBURP01; Flags: Precursor
Os06g0208300	0.549829	0.491757	--	K15172|0|osa:4340446|putative transcription elongation factor SPT5 homolog 1	--	putative transcription elongation factor SPT5 homolog 1 [Oryza sativa Japonica Group]
Os06g0158000	0.820876	0.208447	--	--	--	putative acyl-CoA synthetase [Oryza sativa Japonica Group]
Os10g0533200	0.278671	0.997629	Cellular Component: plastid (GO:0009536);;	--	--	protein SAR DEFICIENT 4 [Oryza sativa Japonica Group]
Os04g0674400	0.0421664	2.59523	Cellular Component: mitochondrial envelope (GO:0005740);; Biological Process: sulfur compound metabolic process (GO:0006790);; Biological Process: apoptotic process (GO:0006915);; Molecular Function: transferase activity, transferring one-carbon groups (GO:0016741);; Molecular Function: hydrolase activity, acting on glycosyl bonds (GO:0016798);; Cellular Component: nuclear lumen (GO:0031981);; Mo…	K22746|4.43711e-159|osa:4337380|anamorsin homolog 1	--	anamorsin homolog 1 [Oryza sativa Japonica Group]
Os03g0439800	0.418235	-0.473189	Molecular Function: RNA binding (GO:0003723);; Biological Process: translational elongation (GO:0006414);; Cellular Component: membrane (GO:0016020);;	--	--	hypothetical protein [Oryza sativa Japonica Group]
Os05g0587100	0.627654	0.336543	Molecular Function: phosphoprotein phosphatase activity (GO:0004721);; Biological Process: cellular protein modification process (GO:0006464);; Molecular Function: cation binding (GO:0043169);;	K17506|0|osa:4339763|probable protein phosphatase 2C 52	--	probable protein phosphatase 2C 52 isoform X1 [Oryza sativa Japonica Group]
Os10g0576000	0.696266	0.265494	Cellular Component: intracellular membrane-bounded organelle (GO:0043231);;	--	--	Os10g0576000, partial [Oryza sativa Japonica Group]
Os09g0130800	0.341793	-0.783574	--	--	--	DNA-binding protein SMUBP-2 isoform X1 [Oryza sativa Japonica Group]
Os11g0594200	0.50352	0.559486	--	K14855|0|osa:4350837|notchless protein homolog	--	notchless protein homolog [Oryza sativa Japonica Group]
Os12g0640900	0.515627	-0.534324	Biological Process: organelle organization (GO:0006996);; Cellular Component: microtubule cytoskeleton (GO:0015630);; Molecular Function: tubulin binding (GO:0015631);;	--	--	microtubule-associated protein 70-1 [Oryza sativa Japonica Group]
Os08g0491000	0.371725	0.793735	Biological Process: cellular protein modification process (GO:0006464);; Biological Process: post-embryonic development (GO:0009791);; Molecular Function: kinase activity (GO:0016301);; Molecular Function: purine ribonucleoside binding (GO:0032550);;	--	--	hypothetical protein OsI_29699 [Oryza sativa Indica Group]
Os07g0143200	0.0906355	-1.05299	Molecular Function: protein binding (GO:0005515);; Cellular Component: intracellular membrane-bounded organelle (GO:0043231);;	--	--	transcription factor PHYTOCHROME INTERACTING FACTOR-LIKE 13-like isoform X2 [Oryza sativa Japonica Group]
Os07g0292800	0.183139	0.588575	--	K02896|1.09664e-97|osa:4342953|probable ribosome biogenesis protein RLP24	Ribosome (ko03010)	probable ribosome biogenesis protein RLP24 [Oryza sativa Japonica Group]
xxx_newGene_4337	0.00646915	1.02304	Molecular Function: purine ribonucleoside binding (GO:0032550);;	--	--	disease resistance protein RGA5-like [Oryza sativa Japonica Group]
Os02g0529400	0.262472	-0.605391	--	--	--	neutral/alkaline invertase 3, chloroplastic [Oryza sativa Japonica Group]
Os12g0237900	0.18522	-1.04777	--	--	--	disease resistance protein RGA5-like [Oryza sativa Japonica Group]
Os07g0202100	0.320172	0.535625	--	K11594|0|osa:4342669|DEAD-box ATP-dependent RNA helicase 52B	--	DEAD-box ATP-dependent RNA helicase 52B [Oryza sativa Japonica Group]
Os12g0566300	0.39927	0.715732	Cellular Component: cytoplasm (GO:0005737);; Cellular Component: intrinsic component of membrane (GO:0031224);; Molecular Function: purine ribonucleoside binding (GO:0032550);; Biological Process: primary metabolic process (GO:0044238);; Molecular Function: transferase activity, transferring acyl groups, acyl groups converted into alkyl on transfer (GO:0046912);;	K01648|0|osa:4352549|ATP-citrate synthase alpha chain protein 3	Citrate cycle (TCA cycle) (ko00020)	ATP-citrate synthase alpha chain protein 3 [Oryza sativa Japonica Group]
Os04g0619900	0.0590565	2.27416	Molecular Function: protein binding (GO:0005515);; Biological Process: programmed cell death (GO:0012501);;	--	--	Os04g0619900 [Oryza sativa Japonica Group]
Os01g0705300	0.439846	0.483558	--	--	--	Os01g0705300, partial [Oryza sativa Japonica Group]
Os06g0316000	0.0774471	-1.38914	--	--	--	uncharacterized protein LOC4340874 [Oryza sativa Japonica Group]
Os05g0295300	0.086077	2.71267	Cellular Component: cytoplasm (GO:0005737);; Biological Process: fatty acid metabolic process (GO:0006631);; Molecular Function: CoA carboxylase activity (GO:0016421);; Molecular Function: ligase activity, forming carbon-nitrogen bonds (GO:0016879);; Molecular Function: purine ribonucleoside binding (GO:0032550);; Molecular Function: cation binding (GO:0043169);; Cellular Component: intracellular…	--	--	Os05g0295300, partial [Oryza sativa Japonica Group]
Os10g0492400	0.0609294	1.55965	Molecular Function: protein kinase activity (GO:0004672);; Biological Process: cellular protein modification process (GO:0006464);; Biological Process: phosphate-containing compound metabolic process (GO:0006796);; Cellular Component: intrinsic component of membrane (GO:0031224);; Molecular Function: purine ribonucleoside binding (GO:0032550);;	--	--	putative receptor-like protein kinase [Oryza sativa Japonica Group]
Os03g0831500	0.0237567	1.21632	--	K01933|0|osa:4334671|phosphoribosylformylglycinamidine cyclo-ligase, chloroplastic	Purine metabolism (ko00230)	hypothetical protein OsJ_13230 [Oryza sativa Japonica Group]
Os07g0106100	0.455243	-0.297963	Molecular Function: protein kinase activity (GO:0004672);; Biological Process: protein phosphorylation (GO:0006468);;	--	--	uncharacterized protein LOC4342197 [Oryza sativa Japonica Group]
Os09g0534800	0.201761	1.49465	Biological Process: transcription, DNA-templated (GO:0006351);; Biological Process: translation (GO:0006412);; Molecular Function: transcription factor binding (GO:0008134);; Molecular Function: translation factor activity, RNA binding (GO:0008135);; Cellular Component: intracellular membrane-bounded organelle (GO:0043231);; Molecular Function: transition metal ion binding (GO:0046914);;	K03124|0|osa:4347689|transcription initiation factor IIB	Basal transcription factors (ko03022)	transcription initiation factor IIB [Oryza sativa Japonica Group]
Os03g0757950	0.387716	1.28148	--	K00012|0|osa:4334169|UDP-glucose 6-dehydrogenase 3	Pentose and glucuronate interconversions (ko00040);; Ascorbate and aldarate metabolism (ko00053);; Amino sugar and nucleotide sugar metabolism (ko00520);; Biosynthesis of cofactors (ko01240)	UDP-glucose 6-dehydrogenase 3 [Oryza sativa Japonica Group]
Os02g0644000	0.110337	1.41817	--	K01369|0|osa:4330133|vacuolar-processing enzyme beta-isozyme 1-like	--	vacuolar-processing enzyme beta-isozyme 1-like [Oryza sativa Japonica Group]
Os04g0402300	0.408387	-0.688778	--	--	--	OTU domain-containing protein DDB_G0284757 [Oryza sativa Japonica Group]
Os04g0679200	0.131161	0.794125	--	--	--	Os04g0679200, partial [Oryza sativa Japonica Group]
Os06g0336200	0.0692653	1.41431	--	K09873|8.33452e-152|osa:4340941|probable aquaporin TIP2-2	--	probable aquaporin TIP2-2 [Oryza sativa Japonica Group]
Os12g0266000	0.0607985	-1.40959	Biological Process: cellular protein modification process (GO:0006464);; Molecular Function: kinase activity (GO:0016301);; Molecular Function: purine ribonucleoside binding (GO:0032550);;	--	--	Os12g0266000, partial [Oryza sativa Japonica Group]
Os12g0150100	0.0059785	1.09585	--	K02898|9.73274e-90|osa:4351513|60S ribosomal protein L26-1	Ribosome (ko03010)	60S ribosomal protein L26-1 [Oryza sativa Japonica Group]
Os06g0554200	0.0108705	-1.48022	Molecular Function: transition metal ion binding (GO:0046914);;	--	--	Os06g0554200 [Oryza sativa Japonica Group]
Os02g0552000	0.363813	0.431338	Cellular Component: intrinsic component of membrane (GO:0031224);;	K17087|0|osa:4329636|transmembrane 9 superfamily member 1	--	transmembrane 9 superfamily member 1 [Oryza sativa Japonica Group]
Os07g0543300	0.148738	-2.79737	Biological Process: polysaccharide metabolic process (GO:0005976);; Molecular Function: amylase activity (GO:0016160);; Molecular Function: metal ion binding (GO:0046872);;	--	--	Os07g0543300, partial [Oryza sativa Japonica Group]
Os03g0808900	0.937704	0.107642	--	K06617|0|osa:9271916|probable galactinol--sucrose galactosyltransferase 2	Galactose metabolism (ko00052)	probable galactinol--sucrose galactosyltransferase 2 [Oryza sativa Japonica Group]
Os05g0181250	0.0317305	-1.24609	--	--	--	Os05g0181250, partial [Oryza sativa Japonica Group]
Os04g0441800	0.482483	0.659975	Biological Process: peptide transport (GO:0015833);; Cellular Component: intrinsic component of membrane (GO:0031224);;	--	--	protein NRT1/ PTR FAMILY 4.4 [Oryza sativa Japonica Group]
Os11g0100200	0.322211	0.66072	Molecular Function: small molecule binding (GO:0036094);; Cellular Component: intracellular membrane-bounded organelle (GO:0043231);; Molecular Function: organic cyclic compound binding (GO:0097159);;	--	--	THO complex subunit 4A isoform X3 [Oryza sativa Japonica Group]
CAA33960	0.079756	-0.931462	--	--	--	envelope membrane protein (plastid) [Oryza sativa Japonica Group]
Os12g0541000	0.394942	0.977172	Biological Process: riboflavin metabolic process (GO:0006771);; Cellular Component: plastid (GO:0009536);; Molecular Function: transferase activity, transferring alkyl or aryl (other than methyl) groups (GO:0016765);;	K00793|8.30431e-157|osa:4352436|riboflavin synthase isoform X1	Riboflavin metabolism (ko00740);; Biosynthesis of cofactors (ko01240)	riboflavin synthase isoform X1 [Oryza sativa Japonica Group]
Os01g0275300	0.614324	0.436349	Cellular Component: intracellular membrane-bounded organelle (GO:0043231);; Molecular Function: organic cyclic compound binding (GO:0097159);;	--	--	hypothetical protein OsI_01365 [Oryza sativa Indica Group]
Os11g0161200	0.0399522	1.07529	Cellular Component: intrinsic component of membrane (GO:0031224);;	--	--	uncharacterized protein LOC112936887 [Oryza sativa Japonica Group]
Os01g0616500	0.477579	0.628899	--	K02890|3.84982e-159|osa:4326653|uncharacterized protein LOC4326653	Ribosome (ko03010)	uncharacterized protein LOC4326653 [Oryza sativa Japonica Group]
Os02g0513100	4.72882e-12	9.40838	--	K15382|0|osa:4329464|bidirectional sugar transporter SWEET15	--	bidirectional sugar transporter SWEET15 [Oryza sativa Japonica Group]
Os06g0710300	0.00379962	1.77016	--	--	--	hypothetical protein OsJ_22622 [Oryza sativa Japonica Group]
Os04g0311400	0.156323	-1.3906	--	--	--	Os04g0311400, partial [Oryza sativa Japonica Group]
Os01g0824800	0.777259	0.434832	Cellular Component: intrinsic component of membrane (GO:0031224);;	--	--	uncharacterized protein LOC4327579 isoform X1 [Oryza sativa Japonica Group]
Os06g0622800	0.551793	0.25963	--	K18442|0|osa:4341555|brefeldin A-inhibited guanine nucleotide-exchange protein 1	Endocytosis (ko04144)	brefeldin A-inhibited guanine nucleotide-exchange protein 1 [Oryza sativa Japonica Group]
Os08g0351200	0.0179771	-2.21322	Cellular Component: intrinsic component of membrane (GO:0031224);;	--	--	hypothetical protein [Oryza sativa Japonica Group]
Os08g0434300	0.00315885	-1.83928	Biological Process: citrate metabolic process (GO:0006101);; Molecular Function: malate dehydrogenase activity (GO:0016615);; Cellular Component: intracellular membrane-bounded organelle (GO:0043231);; Biological Process: dicarboxylic acid metabolic process (GO:0043648);; Biological Process: primary metabolic process (GO:0044238);;	K00026|0|osa:4345657|malate dehydrogenase, chloroplastic	Citrate cycle (TCA cycle) (ko00020);; Cysteine and methionine metabolism (ko00270);; Pyruvate metabolism (ko00620);; Glyoxylate and dicarboxylate metabolism (ko00630);; Carbon fixation in photosynthetic organisms (ko00710);; Carbon metabolism (ko01200)	malate dehydrogenase, chloroplastic isoform X2 [Oryza sativa Japonica Group]
Os04g0478600	0.472285	0.864669	Cellular Component: intrinsic component of membrane (GO:0031224);;	--	--	hypothetical protein OsI_16321 [Oryza sativa Indica Group]
Os02g0504500	0.625363	0.339257	--	--	--	inner centromere protein B [Oryza sativa Japonica Group]
Os02g0629400	0.276039	1.61471	Molecular Function: protein kinase activity (GO:0004672);; Biological Process: cellular protein modification process (GO:0006464);; Biological Process: phosphate-containing compound metabolic process (GO:0006796);; Cellular Component: intrinsic component of membrane (GO:0031224);; Molecular Function: purine ribonucleoside binding (GO:0032550);;	--	--	phytosulfokine receptor 1 [Oryza sativa Japonica Group]
Os05g0437700	0.507693	0.620044	Molecular Function: nucleic acid binding transcription factor activity (GO:0001071);; Molecular Function: DNA binding (GO:0003677);; Biological Process: transcription, DNA-templated (GO:0006351);;	--	--	unknown protein [Oryza sativa Japonica Group]
Os04g0599100	0.711803	0.471743	--	--	--	uncharacterized protein At1g51745 [Oryza sativa Japonica Group]
Os12g0170700	0.780392	0.287722	Molecular Function: acetyltransferase activity (GO:0016407);;	--	--	Os12g0170700 [Oryza sativa Japonica Group]
Os03g0775000	0.00230277	-2.15165	--	--	--	uncharacterized protein LOC4334283 [Oryza sativa Japonica Group]
Os02g0105800	0.344709	1.60186	--	--	--	uncharacterized protein LOC4328015 isoform X2 [Oryza sativa Japonica Group]
Os11g0138600	0.612161	0.586714	Biological Process: phosphate-containing compound metabolic process (GO:0006796);;	--	--	Os11g0138600 [Oryza sativa Japonica Group]
Os12g0149900	0.0725392	0.667846	--	--	--	IQ domain-containing protein IQM3 [Oryza sativa Japonica Group]
Os02g0797200	0.191657	1.20934	Molecular Function: structural molecule activity (GO:0005198);; Biological Process: gene expression (GO:0010467);; Cellular Component: intracellular ribonucleoprotein complex (GO:0030529);; Cellular Component: intracellular membrane-bounded organelle (GO:0043231);; Cellular Component: cytoplasmic part (GO:0044444);;	K02924|4.6734e-29|zma:103654171|60S ribosomal protein L39-like	Ribosome (ko03010)	hypothetical protein GQ55_1G423300 [Panicum hallii var. hallii]
Os01g0728900	0.406697	0.539714	Cellular Component: intracellular membrane-bounded organelle (GO:0043231);;	--	--	hypothetical protein OsI_03605 [Oryza sativa Indica Group]
Os10g0124000	0.299443	0.927434	--	K12845|1.9461e-75|osa:4348007|13 kDa ribonucleoprotein-associated protein	Ribosome biogenesis in eukaryotes (ko03008);; Spliceosome (ko03040)	13 kDa ribonucleoprotein-associated protein [Oryza sativa Japonica Group]
Os08g0427300	0.769491	0.162992	--	--	--	vacuolar fusion protein CCZ1 homolog isoform X2 [Oryza sativa Japonica Group]
Os01g0859200	0.780592	0.215342	--	--	--	uncharacterized protein LOC4325060 [Oryza sativa Japonica Group]
Os03g0266300	4.32291e-09	6.06023	Biological Process: response to reactive oxygen species (GO:0000302);; Biological Process: response to metal ion (GO:0010038);; Cellular Component: intracellular membrane-bounded organelle (GO:0043231);; Biological Process: response to alcohol (GO:0097305);;	K13993|1.10084e-89|osa:4332357|17.9 kDa class I heat shock protein	Protein processing in endoplasmic reticulum (ko04141)	17.9 kDa class I heat shock protein [Oryza sativa Japonica Group]
Os12g0236400	0.0127178	2.65861	--	K00939|1.67051e-171|osa:4351850|adenylate kinase 3	Purine metabolism (ko00230);; Thiamine metabolism (ko00730);; Biosynthesis of cofactors (ko01240)	adenylate kinase 3 [Oryza sativa Japonica Group]
Os07g0660400	0.00578262	1.05658	--	--	--	unknown protein [Oryza sativa Japonica Group]
Os01g0111900	0.327872	-1.07002	--	--	--	hypothetical protein OsJ_00097 [Oryza sativa Japonica Group]
Os01g0760400	0.385288	-0.394036	Biological Process: cell communication (GO:0007154);; Cellular Component: membrane (GO:0016020);; Molecular Function: purine ribonucleoside binding (GO:0032550);; Cellular Component: intracellular membrane-bounded organelle (GO:0043231);;	--	--	uncharacterized protein LOC4325620 [Oryza sativa Japonica Group]
Os05g0220900	0.306693	0.569646	--	--	--	histone H3.v1 [Oryza sativa Japonica Group]
Os04g0269600	0.303781	-0.892831	Molecular Function: oxidoreductase activity, acting on the CH-NH2 group of donors, oxygen as acceptor (GO:0016641);; Biological Process: single-organism metabolic process (GO:0044710);; Molecular Function: transition metal ion binding (GO:0046914);; Molecular Function: cofactor binding (GO:0048037);; Biological Process: organonitrogen compound metabolic process (GO:1901564);;	K00276|0|osa:4335335|LOW QUALITY PROTEIN: primary amine oxidase	Glycine, serine and threonine metabolism (ko00260);; Tyrosine metabolism (ko00350);; Phenylalanine metabolism (ko00360);; beta-Alanine metabolism (ko00410);; Isoquinoline alkaloid biosynthesis (ko00950);; Tropane, piperidine and pyridine alkaloid biosynthesis (ko00960)	hypothetical protein OsJ_14075 [Oryza sativa Japonica Group]
Os05g0553150	0.726505	0.282966	Cellular Component: mitochondrion (GO:0005739);; Biological Process: ATP biosynthetic process (GO:0006754);; Biological Process: energy coupled proton transmembrane transport, against electrochemical gradient (GO:0015988);; Molecular Function: cation-transporting ATPase activity (GO:0019829);; Molecular Function: purine ribonucleoside binding (GO:0032550);; Cellular Component: proton-transporting…	K02133|0|mus:103979242|ATP synthase subunit beta, mitochondrial-like	Oxidative phosphorylation (ko00190)	hypothetical protein OsI_03305 [Oryza sativa Indica Group]
Os10g0560400	0.0194159	-1.3004	--	--	--	transcription factor GHD7-like [Oryza sativa Japonica Group]
Os06g0358800	0.569854	-0.378425	--	--	--	ribonuclease 3-like protein 3 [Oryza sativa Japonica Group]
Os04g0573200	0.200373	1.23338	--	--	--	subtilisin-like protease SBT1.3 [Oryza sativa Japonica Group]
Os11g0703400	0.553213	0.657462	Cellular Component: late endosome (GO:0005770);; Biological Process: vesicle budding from membrane (GO:0006900);; Biological Process: protein localization (GO:0008104);; Cellular Component: endosomal part (GO:0044440);;	K12191|8.27207e-120|osa:4351205|vacuolar protein sorting-associated protein 2 homolog 1	Endocytosis (ko04144)	vacuolar protein sorting-associated protein 2 homolog 1 [Oryza sativa Japonica Group]
Os02g0782700	0.734225	0.33389	Molecular Function: nucleic acid binding transcription factor activity (GO:0001071);; Molecular Function: nucleic acid binding (GO:0003676);; Biological Process: transcription, DNA-templated (GO:0006351);; Biological Process: response to stress (GO:0006950);; Cellular Component: intracellular membrane-bounded organelle (GO:0043231);;	--	--	RecName: Full=Ethylene-responsive transcription factor 1; AltName: Full=Ethylene-responsive element-binding factor 1; Short=EREBP-1; Short=OsEREBP1
Os01g0627800	0.0631607	1.54163	--	--	--	cytochrome P450 72A13 [Oryza sativa Japonica Group]
Os05g0594900	0.477116	0.405045	--	K12627|1.06702e-61|osa:4339810|sm-like protein LSM8	RNA degradation (ko03018);; Spliceosome (ko03040)	sm-like protein LSM8 [Oryza sativa Japonica Group]
Os07g0151200	0.229788	0.956326	Molecular Function: myo-inositol transmembrane transporter activity (GO:0005365);; Cellular Component: plasma membrane (GO:0005886);; Biological Process: hydrogen transport (GO:0006818);; Molecular Function: solute:cation symporter activity (GO:0015294);; Biological Process: glucose transport (GO:0015758);; Biological Process: polyol transport (GO:0015791);; Cellular Component: intrinsic componen…	K08150|0|osa:4342413|probable inositol transporter 2	--	probable inositol transporter 2 [Oryza sativa Japonica Group]
Os10g0162832	0.455243	-0.69849	Biological Process: response to stress (GO:0006950);; Biological Process: programmed cell death (GO:0012501);; Molecular Function: purine ribonucleoside binding (GO:0032550);;	K13457|0|ats:109780890|LOC109780890; disease resistance protein RPM1-like	Plant-pathogen interaction (ko04626)	hypothetical protein EE612_050210 [Oryza sativa]
Os01g0763100	0.402436	0.628296	--	--	--	RHOMBOID-like protein 12, mitochondrial isoform X1 [Oryza sativa Japonica Group]
Os05g0528200	0.440557	0.604558	--	K02887|3.78048e-82|osa:4339398|50S ribosomal protein L20	Ribosome (ko03010)	hypothetical protein OsI_20708 [Oryza sativa Indica Group]
Os08g0105800	0.223597	0.56943	Molecular Function: monooxygenase activity (GO:0004497);; Cellular Component: intrinsic component of membrane (GO:0031224);; Biological Process: single-organism metabolic process (GO:0044710);; Molecular Function: tetrapyrrole binding (GO:0046906);; Molecular Function: transition metal ion binding (GO:0046914);;	--	--	indole-2-monooxygenase [Oryza sativa Japonica Group]
Os01g0271500	0.513521	0.340531	--	K10686|0|osa:4325169|NEDD8-activating enzyme E1 catalytic subunit	Ubiquitin mediated proteolysis (ko04120)	NEDD8-activating enzyme E1 catalytic subunit [Oryza sativa Japonica Group]
Os09g0465600	0.00130938	-1.22829	Biological Process: glucose metabolic process (GO:0006006);; Biological Process: pyruvate metabolic process (GO:0006090);; Molecular Function: intramolecular oxidoreductase activity, interconverting aldoses and ketoses (GO:0016861);; Cellular Component: intracellular membrane-bounded organelle (GO:0043231);;	K01810|0|osa:4347311|glucose-6-phosphate isomerase 1, chloroplastic	Glycolysis / Gluconeogenesis (ko00010);; Pentose phosphate pathway (ko00030);; Starch and sucrose metabolism (ko00500);; Amino sugar and nucleotide sugar metabolism (ko00520);; Carbon metabolism (ko01200)	glucose-6-phosphate isomerase 1, chloroplastic [Oryza sativa Japonica Group]
Os07g0568300	0.568354	0.533964	--	--	--	zinc finger CCCH domain-containing protein 50 [Oryza sativa Japonica Group]
Os03g0321900	0.171796	1.29124	--	K23735|2.4436e-163|osa:4332681|octanoyltransferase	Lipoic acid metabolism (ko00785);; Biosynthesis of cofactors (ko01240)	octanoyltransferase LIP2, mitochondrial [Oryza sativa Japonica Group]
Os02g0505400	0.983917	0.0173404	--	K07195|0|osa:4329434|exocyst complex component EXO70B1	--	exocyst complex component EXO70B1 [Oryza sativa Japonica Group]
Os11g0127800	0.224236	-1.00938	Cellular Component: intracellular membrane-bounded organelle (GO:0043231);;	--	--	Os11g0127800, partial [Oryza sativa Japonica Group]
Os04g0584800	0.624945	0.391865	--	K23878|0|osa:4336785|uncharacterized protein LOC4336785	--	uncharacterized protein LOC4336785 [Oryza sativa Japonica Group]
Os03g0281800	0.371659	0.513708	--	K13141|0|osa:4332448|protein SIEL isoform X1	--	protein SIEL isoform X2 [Oryza sativa Japonica Group]
Os02g0116500	0.110181	-0.938765	Molecular Function: catalytic activity (GO:0003824);;	--	--	dehydrogenase/reductase SDR family member FEY [Oryza sativa Japonica Group]
Os04g0477025	0.00454422	-1.50565	--	--	--	BTB/POZ domain-containing protein At1g67900 [Oryza sativa Japonica Group]
Os08g0440900	0.0452712	-0.791787	Cellular Component: intrinsic component of membrane (GO:0031224);; Cellular Component: intracellular membrane-bounded organelle (GO:0043231);; Biological Process: primary metabolic process (GO:0044238);;	--	--	Os08g0440900, partial [Oryza sativa Japonica Group]
Os06g0651300	0.325593	-0.686008	--	--	--	unknown protein [Oryza sativa Japonica Group]
Os09g0283600	0.00917565	-1.54224	--	--	--	probable E3 ubiquitin-protein ligase ARI9 [Oryza sativa Japonica Group]
Os10g0567500	0.873736	0.296045	Biological Process: RNA processing (GO:0006396);; Cellular Component: intracellular membrane-bounded organelle (GO:0043231);;	--	--	nuclear intron maturase 2, mitochondrial [Oryza sativa Japonica Group]
Os10g0400100	0.233305	-0.457458	--	K01874|0|osa:4348562|probable methionine--tRNA ligase	Selenocompound metabolism (ko00450);; Aminoacyl-tRNA biosynthesis (ko00970)	probable methionine--tRNA ligase [Oryza sativa Japonica Group]
Os06g0539400	0.0131321	-2.16775	--	--	--	cationic amino acid transporter 8, vacuolar [Oryza sativa Japonica Group]
Os10g0488100	0.651608	0.226812	Molecular Function: protein binding (GO:0005515);; Cellular Component: cytoplasm (GO:0005737);; Biological Process: cellular process (GO:0009987);; Cellular Component: protein complex (GO:0043234);;	K04797|7.23667e-33|osa:4348957|probable prefoldin subunit 5	--	prefoldin subunit 5, putative, expressed [Oryza sativa Japonica Group]
Os08g0103500	0.0176197	3.01953	Biological Process: phosphate-containing compound metabolic process (GO:0006796);; Molecular Function: transferase activity, transferring phosphorus-containing groups (GO:0016772);; Cellular Component: intrinsic component of membrane (GO:0031224);; Molecular Function: phosphoric ester hydrolase activity (GO:0042578);; Biological Process: primary metabolic process (GO:0044238);;	--	--	PI-PLC X domain-containing protein At5g67130 isoform X1 [Oryza sativa Japonica Group]
Os04g0462300	0.0443239	-1.42298	Cellular Component: intrinsic component of membrane (GO:0031224);; Cellular Component: intracellular membrane-bounded organelle (GO:0043231);;	--	--	uncharacterized protein LOC4336064 [Oryza sativa Japonica Group]
Os01g0947700	0.24552	-0.530659	--	--	--	uncharacterized protein LOC4325836 [Oryza sativa Japonica Group]
Os04g0531600	0.546626	0.749111	Molecular Function: protein kinase activity (GO:0004672);; Biological Process: cellular protein modification process (GO:0006464);; Biological Process: phosphate-containing compound metabolic process (GO:0006796);; Cellular Component: intrinsic component of membrane (GO:0031224);; Molecular Function: purine ribonucleoside binding (GO:0032550);;	--	--	L-type lectin-domain containing receptor kinase IV.1 [Oryza sativa Japonica Group]
Os03g0254800	0.740379	0.323107	--	K01736|0|osa:4332286|chorismate synthase 2, chloroplastic	Phenylalanine, tyrosine and tryptophan biosynthesis (ko00400);; Biosynthesis of amino acids (ko01230)	chorismate synthase 2, chloroplastic [Oryza sativa Japonica Group]
Os03g0286800	0.0127465	1.07209	--	--	--	WD domain containing protein, putative, expressed [Oryza sativa Japonica Group]
Os01g0164500	0.351591	0.710143	--	K14809|0|osa:4324413|DEAD-box ATP-dependent RNA helicase 18	--	DEAD-box ATP-dependent RNA helicase 18 [Oryza sativa Japonica Group]
Os08g0134900	0.849964	0.143377	--	--	--	uncharacterized protein LOC4344604 [Oryza sativa Japonica Group]
Os01g0784833	0.528114	0.767019	Molecular Function: catalytic activity (GO:0003824);; Biological Process: transcription, DNA-templated (GO:0006351);; Molecular Function: ribonucleotide binding (GO:0032553);; Biological Process: single-organism metabolic process (GO:0044710);;	K03809|5.28488e-121|osa:4327039|NAD(P)H dehydrogenase (quinone) FQR1	Ubiquinone and other terpenoid-quinone biosynthesis (ko00130);; Biosynthesis of cofactors (ko01240)	NAD(P)H dehydrogenase (quinone) FQR1 [Oryza sativa Japonica Group]
Os02g0647900	0.0346971	-1.45588	--	K00128|0|osa:4330149|aldehyde dehydrogenase family 3 member F1	Glycolysis / Gluconeogenesis (ko00010);; Ascorbate and aldarate metabolism (ko00053);; Fatty acid degradation (ko00071);; Valine, leucine and isoleucine degradation (ko00280);; Lysine degradation (ko00310);; Arginine and proline metabolism (ko00330);; Histidine metabolism (ko00340);; Tryptophan metabolism (ko00380);; beta-Alanine metabolism (ko00410);; Glycerolipid metabolism (ko00561);; Pyruvate…	aldehyde dehydrogenase family 3 member F1 [Oryza sativa Japonica Group]
xxx_newGene_11345	0.22612	-0.687817	Molecular Function: nucleic acid binding (GO:0003676);; Biological Process: RNA processing (GO:0006396);; Biological Process: tRNA metabolic process (GO:0006399);; Cellular Component: plastid (GO:0009536);;	K20000|0|osa:3131450|matK, OrsajCp003; maturase K	--	unnamed protein product (chloroplast) [Oryza sativa Japonica Group]
xxx_newGene_10858	0.473056	0.619453	Biological Process: phosphate-containing compound metabolic process (GO:0006796);; Molecular Function: phosphatase activity (GO:0016791);; Molecular Function: hydro-lyase activity (GO:0016836);; Molecular Function: intramolecular oxidoreductase activity, interconverting keto- and enol-groups (GO:0016862);; Biological Process: S-adenosylmethionine cycle (GO:0033353);; Cellular Component: intracell…	--	--	expressed protein, having alternative splicing products [Oryza sativa Japonica Group]
Os02g0192400	0.77688	0.182233	Cellular Component: nucleus (GO:0005634);; Biological Process: DNA metabolic process (GO:0006259);; Biological Process: macromolecule modification (GO:0043412);; Molecular Function: transition metal ion binding (GO:0046914);;	K22768|0|osa:4328584|methyl-CpG-binding domain-containing protein 9 isoform X1	--	methyl-CpG-binding domain-containing protein 9 isoform X3 [Oryza sativa Japonica Group]
Os11g0142500	0.00923891	0.991978	Biological Process: leucine metabolic process (GO:0006551);; Cellular Component: intracellular membrane-bounded organelle (GO:0043231);; Molecular Function: transferase activity, transferring acyl groups, acyl groups converted into alkyl on transfer (GO:0046912);;	K01649|0|osa:4349745|2-isopropylmalate synthase A	Valine, leucine and isoleucine biosynthesis (ko00290);; Pyruvate metabolism (ko00620);; 2-Oxocarboxylic acid metabolism (ko01210);; Biosynthesis of amino acids (ko01230)	2-isopropylmalate synthase A [Oryza sativa Japonica Group]
Os07g0604400	0.378883	0.611907	Biological Process: extracellular matrix organization (GO:0030198);; Cellular Component: intrinsic component of membrane (GO:0031224);; Biological Process: growth (GO:0040007);;	--	--	COBRA-like protein 6 [Oryza sativa Japonica Group]
Os12g0514450	0.709032	0.451307	Cellular Component: intracellular membrane-bounded organelle (GO:0043231);; Molecular Function: transition metal ion binding (GO:0046914);;	--	--	OBERON-like protein [Oryza sativa Japonica Group]
Os05g0374600	0.638178	0.198199	Cellular Component: plastid (GO:0009536);;	--	--	Os05g0374600, partial [Oryza sativa Japonica Group]
Os08g0430700	0.0517528	0.756238	--	--	--	ultraviolet-B receptor UVR8 [Oryza sativa Japonica Group]
Os06g0171900	0.0232798	1.19109	--	--	--	uncharacterized WD repeat-containing protein C2A9.03 [Oryza sativa Japonica Group]
Os03g0754900	0.725166	0.271578	--	--	--	Os03g0754900, partial [Oryza sativa Japonica Group]
Os11g0438700	0.582014	0.523658	Molecular Function: catalytic activity (GO:0003824);; Biological Process: single-organism metabolic process (GO:0044710);;	K08081|2.22844e-51|osa:4350416|tropinone reductase homolog At5g06060	Tropane, piperidine and pyridine alkaloid biosynthesis (ko00960)	Tropinone reductase, putative, expressed [Oryza sativa Japonica Group]
Os06g0712700	0.23085	0.875647	--	K09264|1.00924e-149|osa:4342047|MADS-box transcription factor 16	--	MADS-box transcription factor 16 [Oryza sativa Japonica Group]
Os09g0513600	0.119587	2.50825	Molecular Function: protein kinase activity (GO:0004672);; Biological Process: protein phosphorylation (GO:0006468);; Molecular Function: purine ribonucleoside binding (GO:0032550);;	--	--	Os09g0513600 [Oryza sativa Japonica Group]
Os12g0143200	0.697274	0.524528	--	K14964|0|osa:4351479|protein TRAUCO isoform X1	--	hypothetical protein OsI_37439 [Oryza sativa Indica Group]
Os08g0326600	0.00287797	1.3101	--	K01951|0|osa:4345281|GMP synthase [glutamine-hydrolyzing]	Purine metabolism (ko00230)	uncharacterized protein LOC4345281 [Oryza sativa Japonica Group]
Os06g0112200	0.0633144	0.919157	--	K01244|5.36657e-161|osa:4339898|5'-methylthioadenosine/S-adenosylhomocysteine nucleosidase 2	Cysteine and methionine metabolism (ko00270)	5&apos;-methylthioadenosine/S-adenosylhomocysteine nucleosidase 2 [Oryza sativa Japonica Group]
Os01g0751600	0.605034	0.550626	--	--	--	GDSL esterase/lipase At4g10955 [Oryza sativa Japonica Group]
Os01g0962400	0.176311	1.32003	--	K12162|8.24603e-54|osa:4324551|ubiquitin-fold modifier 1	--	ubiquitin-fold modifier 1 [Oryza sativa Japonica Group]
Os07g0658400	0.258154	-0.848635	--	K00284|0|osa:4344164|ferredoxin-dependent glutamate synthase, chloroplastic	Glyoxylate and dicarboxylate metabolism (ko00630);; Nitrogen metabolism (ko00910)	ferredoxin-dependent glutamate synthase, chloroplastic [Oryza sativa Japonica Group]
Os09g0284600	0.519198	0.303939	Biological Process: transcription from RNA polymerase II promoter (GO:0006366);; Cellular Component: NuA4 histone acetyltransferase complex (GO:0035267);;	K11322|4.08312e-114|osa:4346622|uncharacterized protein LOC4346622	--	Os09g0284600 [Oryza sativa Japonica Group]
Os04g0303900	0.770735	0.158967	Molecular Function: RNA binding (GO:0003723);; Cellular Component: plastid (GO:0009536);;	--	--	OSJNBa0079M09.8 [Oryza sativa Japonica Group]
Os01g0279700	0.564487	-0.382888	--	K08193|0|osa:4326905|probable anion transporter 1, chloroplastic	--	probable anion transporter 1, chloroplastic [Oryza sativa Japonica Group]
Os06g0702600	0.762467	0.395564	Molecular Function: nucleic acid binding (GO:0003676);; Biological Process: transcription, DNA-templated (GO:0006351);; Biological Process: hormone-mediated signaling pathway (GO:0009755);; Cellular Component: intracellular membrane-bounded organelle (GO:0043231);;	--	--	putative auxin response factor 7a [Oryza sativa Japonica Group]
Os01g0711400	0.161521	-1.09168	--	K00281|0|osa:4325932|glycine dehydrogenase (decarboxylating), mitochondrial	Glycine, serine and threonine metabolism (ko00260);; Glyoxylate and dicarboxylate metabolism (ko00630);; Carbon metabolism (ko01200)	hypothetical protein OsJ_03218 [Oryza sativa Japonica Group]
Os03g0332100	0.0455919	-1.32563	--	K20666|0|osa:4332734|cytochrome P450 714B2 isoform X2	Diterpenoid biosynthesis (ko00904)	cytochrome P450 714B2 isoform X2 [Oryza sativa Japonica Group]
Os01g0243200	0.0761329	1.37521	Cellular Component: intrinsic component of membrane (GO:0031224);; Cellular Component: intracellular membrane-bounded organelle (GO:0043231);; Biological Process: establishment of localization (GO:0051234);;	--	--	Os01g0243200 [Oryza sativa Japonica Group]
Os12g0585300	0.317202	0.897674	Molecular Function: DNA helicase activity (GO:0003678);; Biological Process: DNA repair (GO:0006281);; Cellular Component: intracellular organelle (GO:0043229);;	--	--	uncharacterized protein LOC9269040 [Oryza sativa Japonica Group]
Os07g0691700	0.0313986	-1.4226	--	--	--	scar-like domain-containing protein WAVE 5 [Oryza sativa Japonica Group]
Os05g0394900	0.028853	-1.07347	--	--	--	probable serine/threonine-protein kinase kinX isoform X1 [Oryza sativa Japonica Group]
Os01g0819000	0.187807	0.992007	Cellular Component: intracellular membrane-bounded organelle (GO:0043231);;	--	--	Os01g0819000, partial [Oryza sativa Japonica Group]
Os05g0480600	0.346254	-0.76395	--	--	--	mucin-5AC [Oryza sativa Japonica Group]
Os03g0583900	0.1103	-0.641746	--	K11592|0|osa:4333337|endoribonuclease Dicer homolog 2a isoform X1	--	endoribonuclease Dicer homolog 2a isoform X1 [Oryza sativa Japonica Group]
Os05g0147400	0.511213	0.404262	Molecular Function: protein binding (GO:0005515);; Biological Process: cellular process (GO:0009987);; Molecular Function: purine ribonucleoside binding (GO:0032550);; Cellular Component: intracellular part (GO:0044424);;	K09498|0|osa:4337802|T-complex protein 1 subunit zeta 1	--	T-complex protein 1 subunit zeta 1 [Oryza sativa Japonica Group]
Os01g0686400	0.439846	0.492269	--	--	--	sll2-s9-protein, partial [Oryza sativa Indica Group]
Os03g0738400	0.328534	-0.785088	Biological Process: one-carbon metabolic process (GO:0006730);; Biological Process: serine family amino acid metabolic process (GO:0009069);; Molecular Function: hydroxymethyl-, formyl- and related transferase activity (GO:0016742);; Molecular Function: anion binding (GO:0043168);; Cellular Component: intracellular membrane-bounded organelle (GO:0043231);;	K00600|0|osa:4334048|serine hydroxymethyltransferase, mitochondrial	Glycine, serine and threonine metabolism (ko00260);; Cyanoamino acid metabolism (ko00460);; Glyoxylate and dicarboxylate metabolism (ko00630);; One carbon pool by folate (ko00670);; Carbon metabolism (ko01200);; Biosynthesis of amino acids (ko01230);; Biosynthesis of cofactors (ko01240)	serine hydroxymethyltransferase, mitochondrial [Oryza sativa Japonica Group]
Os05g0127200	0.00870842	-1.9073	Molecular Function: phospholipase C activity (GO:0004629);; Biological Process: lipid metabolic process (GO:0006629);; Biological Process: signal transduction (GO:0007165);; Cellular Component: cell part (GO:0044464);;	K05857|0|osa:4337686|phosphoinositide phospholipase C 2	Inositol phosphate metabolism (ko00562);; Phosphatidylinositol signaling system (ko04070)	phosphoinositide phospholipase C 2 isoform X1 [Oryza sativa Japonica Group]
xxx_newGene_7670	0.0529737	1.82534	Cellular Component: intracellular membrane-bounded organelle (GO:0043231);;	--	--	hypothetical protein OsJ_26132 [Oryza sativa Japonica Group]
xxx_newGene_10299	0.468753	0.688681	Biological Process: DNA synthesis involved in DNA repair (GO:0000731);; Molecular Function: nucleic acid binding (GO:0003676);; Molecular Function: exonuclease activity (GO:0004527);; Molecular Function: DNA polymerase activity (GO:0034061);; Molecular Function: small molecule binding (GO:0036094);; Cellular Component: DNA polymerase complex (GO:0042575);;	K02350|0|osa:4344230|DNA polymerase zeta catalytic subunit isoform X1	--	DNA polymerase zeta catalytic subunit isoform X3 [Oryza sativa Japonica Group]
Os05g0531000	0.244606	-0.870328	--	--	--	uncharacterized protein LOC4339412 [Oryza sativa Japonica Group]
Os03g0133800	7.59632e-09	8.86932	--	--	--	probable acyl-activating enzyme 1, peroxisomal isoform X1 [Oryza sativa Japonica Group]
Os01g0779400	0.90116	-0.104285	Biological Process: cellular process (GO:0009987);; Molecular Function: purine ribonucleoside binding (GO:0032550);; Molecular Function: transition metal ion binding (GO:0046914);;	--	--	helicase-like transcription factor CHR28 isoform X3 [Oryza sativa Japonica Group]
Os07g0686900	0.135561	2.40255	Molecular Function: hydrolase activity, hydrolyzing O-glycosyl compounds (GO:0004553);; Biological Process: arabinose metabolic process (GO:0019566);; Cellular Component: intrinsic component of membrane (GO:0031224);;	K01209|0|osa:9268769|alpha-L-arabinofuranosidase 1	Amino sugar and nucleotide sugar metabolism (ko00520)	alpha-L-arabinofuranosidase 1 [Oryza sativa Japonica Group]
CAA33986	0.663314	0.30035	--	K03043|0|osa:3131432|rpoB, OrsajCp015; RNA polymerase beta subunit	RNA polymerase (ko03020)	RNA polymerase beta subunit (plastid) [Oryza sativa Japonica Group]
Os04g0482700	0.852064	0.115498	--	--	--	H0525D09.10 [Oryza sativa]
Os08g0359600	0.331525	0.744552	--	K02961|1.45548e-51|osa:4345370|30S ribosomal protein S17	Ribosome (ko03010)	uncharacterized protein LOC4345370 [Oryza sativa Japonica Group]
Os03g0639300	0.0728978	-1.09387	Molecular Function: nucleic acid binding (GO:0003676);; Molecular Function: protein binding (GO:0005515);;	--	--	transcription factor PHYTOCHROME INTERACTING FACTOR-LIKE 13-like isoform X3 [Oryza sativa Japonica Group]
Os12g0621900	0.890641	0.0779772	--	--	--	Os12g0621900, partial [Oryza sativa Japonica Group]
Os01g0752100	0.421448	0.83194	--	--	--	F-box/LRR-repeat protein At5g02910 [Oryza sativa Japonica Group]
Os11g0113200	0.636202	0.218342	Cellular Component: intrinsic component of membrane (GO:0031224);; Cellular Component: intracellular membrane-bounded organelle (GO:0043231);;	--	--	stress response protein nst1 [Oryza sativa Japonica Group]
Os05g0427400	0.00301254	-1.57369	Biological Process: L-phenylalanine metabolic process (GO:0006558);; Biological Process: phenylpropanoid biosynthetic process (GO:0009699);; Molecular Function: ammonia-lyase activity (GO:0016841);; Cellular Component: intracellular part (GO:0044424);;	K10775|0|osa:4338861|phenylalanine ammonia-lyase	Phenylalanine metabolism (ko00360);; Phenylpropanoid biosynthesis (ko00940)	phenylalanine ammonia-lyase [Oryza sativa Japonica Group]
Os01g0528000	0.982862	0.0216164	--	--	--	transcription factor-like protein [Oryza sativa Japonica Group]
Os08g0132600	0.475727	0.267139	--	--	--	uncharacterized protein LOC4344598 isoform X1 [Oryza sativa Japonica Group]
Os05g0439400	0.000576869	-1.76047	Molecular Function: ubiquitin-like protein transferase activity (GO:0019787);; Biological Process: protein modification by small protein conjugation (GO:0032446);;	--	--	U-box domain-containing protein 29 [Oryza sativa Japonica Group]
xxx_newGene_5856	0.0686844	-1.05441	--	--	--	--
Os07g0535800	0.00748305	2.98796	Molecular Function: protein kinase activity (GO:0004672);; Biological Process: cellular protein modification process (GO:0006464);; Biological Process: phosphate-containing compound metabolic process (GO:0006796);; Cellular Component: intrinsic component of membrane (GO:0031224);; Molecular Function: purine ribonucleoside binding (GO:0032550);;	--	--	receptor-like protein kinase-like [Oryza sativa Japonica Group]
Os02g0274100	0.0435429	2.36895	Cellular Component: cell-cell junction (GO:0005911);; Biological Process: fatty acid catabolic process (GO:0009062);; Cellular Component: plastid (GO:0009536);; Biological Process: jasmonic acid metabolic process (GO:0009694);; Cellular Component: microtubule cytoskeleton (GO:0015630);; Molecular Function: tubulin binding (GO:0015631);; Molecular Function: oxidoreductase activity, acting on the C…	K10527|0|osa:4328997|peroxisomal fatty acid beta-oxidation multifunctional protein	Fatty acid degradation (ko00071);; alpha-Linolenic acid metabolism (ko00592);; Fatty acid metabolism (ko01212)	peroxisomal fatty acid beta-oxidation multifunctional protein [Oryza sativa Japonica Group]
Os06g0574200	0.799948	0.319676	--	--	--	U-box domain-containing protein 34 isoform X2 [Oryza sativa Japonica Group]
Os03g0754500	0.127275	-2.05914	Biological Process: extracellular matrix organization (GO:0030198);; Cellular Component: intrinsic component of membrane (GO:0031224);; Biological Process: growth (GO:0040007);;	--	--	COBRA-like protein 4 precursor, putative, expressed [Oryza sativa Japonica Group]
Os02g0506400	0.129983	2.26629	--	--	--	F-box protein At5g50450 [Oryza sativa Japonica Group]
Os02g0755900	0.109843	3.00036	--	--	--	Os02g0755900, partial [Oryza sativa Japonica Group]
Os02g0483500	0.0812323	2.30168	Molecular Function: transferase activity, transferring acyl groups (GO:0016746);; Cellular Component: intracellular membrane-bounded organelle (GO:0043231);;	--	--	phenolic glucoside malonyltransferase 1 [Oryza sativa Japonica Group]
Os06g0274300	0.00236554	-1.61358	--	--	--	LRR receptor kinase SERL2-like [Oryza sativa Japonica Group]
Os10g0167300	0.0381355	1.54736	--	--	--	Os10g0167300 [Oryza sativa Japonica Group]
Os04g0505700	0.437157	0.981298	--	--	--	F-box protein At1g47056 [Oryza sativa Japonica Group]
Os04g0278900	0.276295	-0.754782	--	K05539|0|osa:4335364|tRNA-dihydrouridine(20/20a) synthase isoform X1	--	uncharacterized protein LOC4335364 isoform X1 [Oryza sativa Japonica Group]
Os05g0232200	0.0461053	-1.63363	--	--	--	hypothetical protein OsI_19064 [Oryza sativa Indica Group]
Os05g0566300	0.0471335	1.65459	--	--	--	unknown protein [Oryza sativa Japonica Group]
Os11g0283500	0.027448	-1.70501	Cellular Component: intrinsic component of membrane (GO:0031224);; Biological Process: establishment of localization (GO:0051234);;	--	--	hypothetical protein EE612_054782 [Oryza sativa]
Os04g0409500	0.998344	-0.00170954	Molecular Function: catalytic activity (GO:0003824);;	--	--	uncharacterized protein LOC4335764 [Oryza sativa Japonica Group]
Os04g0479200	0.112234	1.95301	Molecular Function: nucleotide binding (GO:0000166);; Molecular Function: isocitrate dehydrogenase activity (GO:0004448);; Biological Process: citrate metabolic process (GO:0006101);; Cellular Component: intracellular membrane-bounded organelle (GO:0043231);; Molecular Function: metal ion binding (GO:0046872);;	K00030|0|osa:4336169|isocitrate dehydrogenase [NAD] regulatory subunit 1, mitochondrial	Citrate cycle (TCA cycle) (ko00020);; Carbon metabolism (ko01200);; 2-Oxocarboxylic acid metabolism (ko01210);; Biosynthesis of amino acids (ko01230)	isocitrate dehydrogenase [NAD] regulatory subunit 1, mitochondrial [Oryza sativa Japonica Group]
Os09g0359800	0.695264	0.276471	--	K11434|0|osa:4346843|probable protein arginine N-methyltransferase 1	--	probable protein arginine N-methyltransferase 1 [Oryza sativa Japonica Group]
Os12g0573000	0.465656	-0.526504	Cellular Component: intrinsic component of membrane (GO:0031224);;	--	--	Os12g0573000 [Oryza sativa Japonica Group]
Os07g0553900	0.172716	-0.637136	Molecular Function: transferase activity, transferring acyl groups (GO:0016746);; Cellular Component: intrinsic component of membrane (GO:0031224);;	--	--	unnamed protein product [Oryza sativa Japonica Group]
Os09g0460700	0.826202	0.306083	Molecular Function: catalytic activity (GO:0003824);;	--	--	tuliposide A-converting enzyme b1, amyloplastic [Oryza sativa Japonica Group]
Os03g0572050	0.885017	0.228197	Molecular Function: secondary active transmembrane transporter activity (GO:0015291);; Biological Process: drug transport (GO:0015893);; Cellular Component: intrinsic component of membrane (GO:0031224);;	K03327|0|osa:4333289|protein DETOXIFICATION 40	--	putative MATE efflux family protein [Oryza sativa Japonica Group]
Os04g0635700	0.075422	1.44779	Cellular Component: plastid stroma (GO:0009532);;	--	--	uncharacterized protein LOC4337135 [Oryza sativa Japonica Group]
Os03g0100100	0.712921	0.401176	Molecular Function: enzyme regulator activity (GO:0030234);; Biological Process: negative regulation of molecular function (GO:0044092);;	--	--	RecName: Full=Pectinesterase inhibitor 12; AltName: Full=Pectin methylesterase inhibitor 12; Short=OsPMEI12; Flags: Precursor
Os03g0586500	0.0806514	-0.885546	Cellular Component: plastid stroma (GO:0009532);; Biological Process: respiratory electron transport chain (GO:0022904);;	--	--	uncharacterized protein LOC4333342 [Oryza sativa Japonica Group]
Os04g0545200	0.352783	-1.57911	--	K23538|0|osa:4336562|uncharacterized protein LOC4336562	--	uncharacterized protein LOC4336562 isoform X1 [Oryza sativa Japonica Group]
Os03g0441000	0.0853	-0.858548	Biological Process: transcription, DNA-templated (GO:0006351);; Biological Process: translation (GO:0006412);; Molecular Function: translation factor activity, RNA binding (GO:0008135);; Cellular Component: DNA-directed RNA polymerase II, holoenzyme (GO:0016591);; Molecular Function: protein dimerization activity (GO:0046983);;	K03129|0|osa:4333214|transcription initiation factor TFIID subunit 4b isoform X1	Basal transcription factors (ko03022)	transcription initiation factor TFIID subunit 4b isoform X1 [Oryza sativa Japonica Group]
Os01g0661000	0.808725	0.220708	Cellular Component: intrinsic component of membrane (GO:0031224);;	--	--	CASP-like protein 4A3 [Oryza sativa Japonica Group]
Os04g0641000	0.103036	1.80165	--	K16252|0|osa:4337169|DNA-directed RNA polymerases IV and V subunit 2	--	Os04g0641000, partial [Oryza sativa Japonica Group]
Os07g0160300	0.715786	0.355685	--	--	--	uncharacterized protein LOC4342450 isoform X1 [Oryza sativa Japonica Group]
Os05g0345400	0.0600722	0.68661	--	K17973|0|osa:4338480|phagocyte signaling-impaired protein isoform X1	--	N-terminal acetyltransferase B complex auxiliary subunit NAA25 isoform X1 [Oryza sativa Japonica Group]
Os09g0345300	1.03125e-06	-3.01984	Molecular Function: protein kinase activity (GO:0004672);; Biological Process: cellular protein modification process (GO:0006464);; Biological Process: phosphate-containing compound metabolic process (GO:0006796);; Cellular Component: intrinsic component of membrane (GO:0031224);; Molecular Function: purine ribonucleoside binding (GO:0032550);;	--	--	leucine-rich repeat family protein /protein kinase family protein-like [Oryza sativa Japonica Group]
Os07g0240600	0.00170248	-2.00115	--	--	--	DIMBOA UDP-glucosyltransferase BX8 [Oryza sativa Japonica Group]
Os06g0343100	0.991124	0.00866167	--	K12818|0|osa:9267698|probable pre-mRNA-splicing factor ATP-dependent RNA helicase DEAH5	Spliceosome (ko03040)	probable pre-mRNA-splicing factor ATP-dependent RNA helicase DEAH5 [Oryza sativa Japonica Group]
Os01g0550200	0.837698	0.18698	Cellular Component: intrinsic component of membrane (GO:0031224);;	--	--	F-box protein SKIP8 [Oryza sativa Japonica Group]
Os05g0128400	0.814246	0.113142	--	K14689|0|osa:4337694|metal tolerance protein 1	--	metal tolerance protein 1 [Oryza sativa Japonica Group]
Os03g0170300	0.689821	0.187325	Biological Process: cellular amino acid biosynthetic process (GO:0008652);; Molecular Function: carbon-oxygen lyase activity, acting on phosphates (GO:0016838);; Cellular Component: intracellular membrane-bounded organelle (GO:0043231);;	--	--	uncharacterized protein LOC4331771 isoform X2 [Oryza sativa Japonica Group]
Os03g0821200	0.804921	0.307285	Molecular Function: nucleic acid binding (GO:0003676);; Biological Process: transcription, DNA-templated (GO:0006351);;	--	--	dof zinc finger protein DOF2.4 isoform X1 [Oryza sativa Japonica Group]
Os11g0156401	5.40109e-06	-1.88397	--	--	--	transcription repressor OFP8-like [Oryza sativa Japonica Group]
Os08g0300300	0.0442194	1.0994	Molecular Function: chloride channel activity (GO:0005254);; Biological Process: inorganic anion transport (GO:0015698);; Cellular Component: intrinsic component of membrane (GO:0031224);; Biological Process: regulation of ion transmembrane transport (GO:0034765);;	K05016|0|osa:4345218|putative chloride channel-like protein CLC-g	--	putative chloride channel-like protein CLC-g [Oryza sativa Japonica Group]
Os12g0555500	0.121215	1.69071	--	--	--	major pollen allergen Bet v 1-D/H [Oryza sativa Japonica Group]
Os07g0171100	0.389513	-0.689403	Cellular Component: intracellular membrane-bounded organelle (GO:0043231);;	--	--	protein MET1, chloroplastic [Oryza sativa Japonica Group]
Os01g0521550	0.891076	0.119043	Molecular Function: purine ribonucleoside binding (GO:0032550);; Cellular Component: intracellular membrane-bounded organelle (GO:0043231);;	--	--	uncharacterized protein LOC4323951 [Oryza sativa Japonica Group]
xxx_newGene_7132	0.158492	-1.18238	Molecular Function: carbon-oxygen lyase activity, acting on phosphates (GO:0016838);; Cellular Component: intracellular membrane-bounded organelle (GO:0043231);; Molecular Function: metal ion binding (GO:0046872);;	--	--	(S)-beta-bisabolene synthase-like [Oryza sativa Japonica Group]
Os06g0128300	0.68836	-0.233409	--	--	--	ABC transporter B family member 25, mitochondrial [Oryza sativa Japonica Group]
Os06g0724700	0.359949	0.467406	--	K06640|0|osa:4342103|serine/threonine-protein kinase ATR isoform X1	--	serine/threonine-protein kinase ATR isoform X2 [Oryza sativa Japonica Group]
Os01g0194300	0.230767	1.48086	--	K14508|0|osa:4327315|regulatory protein NPR1 isoform X1	Plant hormone signal transduction (ko04075)	BTB/POZ domain and ankyrin repeat-containing protein NPR1 isoform X1 [Oryza sativa Japonica Group]
Os06g0503400	0.304289	0.974488	Cellular Component: intrinsic component of membrane (GO:0031224);; Cellular Component: intracellular membrane-bounded organelle (GO:0043231);; Molecular Function: organic cyclic compound binding (GO:0097159);;	--	--	reticulon-like protein B2 [Oryza sativa Japonica Group]
Os03g0381300	0.0465129	1.51324	--	--	--	co-chaperone protein p23-1 [Oryza sativa Japonica Group]
Os06g0714500	0.194078	1.19266	--	K22530|0|osa:4342062|ATPase family AAA domain-containing protein 1 isoform X1	--	ATPase family AAA domain-containing protein 1 isoform X1 [Oryza sativa Japonica Group]
Os07g0508000	0.953639	0.0346699	Molecular Function: nucleic acid binding (GO:0003676);; Molecular Function: helicase activity (GO:0004386);; Molecular Function: purine ribonucleoside binding (GO:0032550);; Cellular Component: intracellular part (GO:0044424);;	K12815|0|osa:4343339|pre-mRNA-splicing factor ATP-dependent RNA helicase DEAH7	Spliceosome (ko03040)	pre-mRNA-splicing factor ATP-dependent RNA helicase DEAH7 [Oryza sativa Japonica Group]
Os01g0960800	0.251786	0.954042	--	K17805|1.26506e-74|osa:9268634|mitochondrial import inner membrane translocase subunit tim16	--	mitochondrial import inner membrane translocase subunit PAM16 like 2 [Oryza sativa Japonica Group]
Os01g0857600	0.126565	-1.58824	--	--	--	uncharacterized protein LOC4324759 [Oryza sativa Japonica Group]
Os02g0566800	0.10787	1.71531	Biological Process: cellular protein modification process (GO:0006464);; Molecular Function: transferase activity, transferring hexosyl groups (GO:0016758);; Cellular Component: intrinsic component of membrane (GO:0031224);; Cellular Component: Golgi apparatus part (GO:0044431);;	--	--	Os02g0566800, partial [Oryza sativa Japonica Group]
Os05g0401000	0.158587	0.699506	Cellular Component: extracellular region (GO:0005576);; Molecular Function: hydrolase activity (GO:0016787);;	--	--	GDSL esterase/lipase At1g54790 [Oryza sativa Japonica Group]
Os09g0502200	0.122341	1.43688	--	--	--	probable glucan endo-1,3-beta-glucosidase A6 isoform X1 [Oryza sativa Japonica Group]
Os04g0502300	0.00447839	1.14998	--	K02949|3.3541e-99|osa:4336317|40S ribosomal protein S11	Ribosome (ko03010)	40S ribosomal protein S11 [Oryza sativa Japonica Group]
Os04g0439900	0.193372	0.576177	Cellular Component: plastid inner membrane (GO:0009528);; Cellular Component: chloroplast thylakoid (GO:0009534);; Biological Process: plastid organization (GO:0009657);; Cellular Component: intrinsic component of membrane (GO:0031224);; Biological Process: protein transmembrane import into intracellular organelle (GO:0044743);;	--	--	protein TIC 40, chloroplastic [Oryza sativa Japonica Group]
Os12g0150200	0.796068	1.40603	Molecular Function: oxidoreductase activity (GO:0016491);; Cellular Component: intrinsic component of membrane (GO:0031224);; Biological Process: single-organism metabolic process (GO:0044710);; Molecular Function: tetrapyrrole binding (GO:0046906);; Molecular Function: transition metal ion binding (GO:0046914);;	--	--	Os12g0150200, partial [Oryza sativa Japonica Group]
Os07g0539300	4.8737e-08	7.81085	--	--	--	glucan endo-1,3-beta-glucosidase 12 [Oryza sativa Japonica Group]
Os09g0560900	0.817799	0.123706	Molecular Function: nucleic acid binding (GO:0003676);; Molecular Function: cation binding (GO:0043169);;	--	--	protein SUPPRESSOR OF FRI 4 isoform X1 [Oryza sativa Japonica Group]
Os03g0190100	0.0749039	0.943393	Cellular Component: plastid (GO:0009536);; Biological Process: photosynthetic electron transport chain (GO:0009767);; Molecular Function: transferase activity, transferring alkyl or aryl (other than methyl) groups (GO:0016765);; Cellular Component: intrinsic component of membrane (GO:0031224);; Biological Process: phylloquinone metabolic process (GO:0042374);; Biological Process: quinone biosynth…	--	--	2-carboxy-1,4-naphthoquinone phytyltransferase, chloroplastic isoform X2 [Oryza sativa Japonica Group]
Os01g0950866	0.130049	-0.90014	--	--	--	hypothetical protein EE612_007995 [Oryza sativa]
Os11g0704525	0.404926	0.986718	Molecular Function: cation binding (GO:0043169);; Cellular Component: intracellular membrane-bounded organelle (GO:0043231);;	--	--	Os11g0704525, partial [Oryza sativa Japonica Group]
xxx_newGene_13769	0.21123	1.0639	--	--	--	protein enabled homolog [Oryza sativa Japonica Group]
Os08g0191900	0.494149	0.617692	Cellular Component: intracellular membrane-bounded organelle (GO:0043231);;	--	--	pentatricopeptide repeat-containing protein At3g59040 [Oryza sativa Japonica Group]
Os03g0205400	0.831648	0.235555	Molecular Function: DNA binding (GO:0003677);; Molecular Function: nuclease activity (GO:0004518);; Biological Process: DNA repair (GO:0006281);; Cellular Component: intracellular membrane-bounded organelle (GO:0043231);;	--	--	Os03g0205400 [Oryza sativa Japonica Group]
Os08g0366000	0.040525	1.69461	--	K01595|0|osa:4345387|phosphoenolpyruvate carboxylase 2	Pyruvate metabolism (ko00620);; Carbon fixation in photosynthetic organisms (ko00710);; Carbon metabolism (ko01200)	phosphoenolpyruvate carboxylase 2 [Oryza sativa Japonica Group]
Os05g0591500	0.593268	-0.474379	Biological Process: sulfur amino acid biosynthetic process (GO:0000097);; Molecular Function: carbon-oxygen lyase activity (GO:0016835);;	--	--	unknown protein [Oryza sativa Japonica Group]
Os10g0493900	0.338524	-0.761186	Cellular Component: plastid (GO:0009536);; Cellular Component: intrinsic component of membrane (GO:0031224);;	--	--	Os10g0493900, partial [Oryza sativa Japonica Group]
Os08g0484600	0.770462	0.131837	--	K07198|0|osa:4345873|carbon catabolite-derepressing protein kinase	--	serine/threonine protein kinase OSK4 [Oryza sativa Japonica Group]
Os06g0495100	0.395452	-0.837877	Molecular Function: secondary active transmembrane transporter activity (GO:0015291);; Biological Process: drug transport (GO:0015893);; Cellular Component: intrinsic component of membrane (GO:0031224);;	--	--	Os06g0495100 [Oryza sativa Japonica Group]
Os01g0788400	0.0249437	3.44927	--	K01051|0|osa:4325861|pectinesterase	Pentose and glucuronate interconversions (ko00040)	pectinesterase [Oryza sativa Japonica Group]
Os08g0489100	0.0130209	-1.83582	--	--	--	flavonol 3-O-glucosyltransferase UGT89B1 [Oryza sativa Japonica Group]
Os08g0404300	0.106646	1.04398	--	K02899|2.2358e-100|osa:9271228|50S ribosomal protein L27	Ribosome (ko03010)	uncharacterized protein LOC4345523 [Oryza sativa Japonica Group]
Os04g0457800	0.116558	-0.702158	Molecular Function: protein kinase activity (GO:0004672);; Biological Process: cellular protein modification process (GO:0006464);; Biological Process: phosphate-containing compound metabolic process (GO:0006796);; Cellular Component: intrinsic component of membrane (GO:0031224);; Molecular Function: purine ribonucleoside binding (GO:0032550);; Cellular Component: intracellular membrane-bounded o…	K13418|0|osa:4336035|somatic embryogenesis receptor kinase 1	--	LRR receptor kinase SERK2-like [Oryza sativa Japonica Group]
Os08g0535600	0.703048	0.393748	Cellular Component: mitochondrial envelope (GO:0005740);; Biological Process: protein localization (GO:0008104);; Cellular Component: intrinsic component of membrane (GO:0031224);; Molecular Function: cation binding (GO:0043169);; Biological Process: establishment of localization (GO:0051234);;	K17780|1.3751e-45|osa:4346155|mitochondrial import inner membrane translocase subunit TIM8	--	mitochondrial import inner membrane translocase subunit TIM8 [Oryza sativa Japonica Group]
Os01g0182500	0.194138	1.46326	--	--	--	uncharacterized protein LOC9272136 isoform X1 [Oryza sativa Japonica Group]
Os03g0275900	0.572956	0.402259	--	--	--	protein spotted leaf 11 [Oryza sativa Japonica Group]
Os04g0683850	0.0308413	-1.83088	Molecular Function: peroxidase activity (GO:0004601);; Biological Process: response to stress (GO:0006950);; Biological Process: single-organism metabolic process (GO:0044710);; Biological Process: cellular detoxification (GO:1990748);;	K00432|1.39247e-83|obr:102701442|probable phospholipid hydroperoxide glutathione peroxidase	Glutathione metabolism (ko00480);; Arachidonic acid metabolism (ko00590)	PREDICTED: probable phospholipid hydroperoxide glutathione peroxidase isoform X1 [Oryza brachyantha]
Os02g0566500	0.444214	0.517817	--	--	--	uncharacterized protein LOC4329710 [Oryza sativa Japonica Group]
Os03g0694000	9.74669e-09	7.18582	--	--	--	germin-like protein 3-6 [Oryza sativa Japonica Group]
Os02g0770100	0.30057	0.603758	Biological Process: cell morphogenesis involved in differentiation (GO:0000904);; Biological Process: photoperiodism (GO:0009648);; Biological Process: defense response, incompatible interaction (GO:0009814);; Cellular Component: intrinsic component of membrane (GO:0031224);; Cellular Component: intracellular membrane-bounded organelle (GO:0043231);; Biological Process: leaf development (GO:00483…	--	--	Os02g0770100, partial [Oryza sativa Japonica Group]
Os07g0695300	0.124954	1.15674	--	--	--	probable serine/threonine-protein kinase PBL7 isoform X2 [Oryza sativa Japonica Group]
Os11g0103800	0.980123	0.0268762	--	--	--	hypothetical protein BAE44_0019403 [Dichanthelium oligosanthes]
Os10g0482900	0.450774	-0.571233	--	--	--	uncharacterized protein LOC4348928 [Oryza sativa Japonica Group]
Os07g0688500	0.214978	1.13432	--	K14376|0|osa:4344356|nuclear poly(A) polymerase 3	mRNA surveillance pathway (ko03015)	nuclear poly(A) polymerase 3 [Oryza sativa Japonica Group]
Os07g0120700	0.417528	0.548285	--	--	--	Os07g0120700, partial [Oryza sativa Japonica Group]
Os02g0146900	0.456001	0.536761	Cellular Component: intracellular membrane-bounded organelle (GO:0043231);;	--	--	unknown protein [Oryza sativa Japonica Group]
Os07g0477000	0.584818	-0.511484	--	K03022|3.59121e-110|osa:4343220|DNA-directed RNA polymerase III subunit RPC8	RNA polymerase (ko03020)	hypothetical protein OsJ_24224 [Oryza sativa Japonica Group]
Os06g0652000	0.936362	0.0816468	--	K10908|0|osa:4341695|DNA-directed RNA polymerase 3B, chloroplastic	--	DNA-directed RNA polymerase 3B, chloroplastic [Oryza sativa Japonica Group]
Os01g0658400	0.00748305	-0.794353	Biological Process: peptidyl-lysine modification (GO:0018205);; Molecular Function: ubiquitin-like protein transferase activity (GO:0019787);; Biological Process: modification-dependent protein catabolic process (GO:0019941);; Biological Process: protein modification by small protein conjugation (GO:0032446);; Molecular Function: purine ribonucleoside binding (GO:0032550);; Cellular Component: in…	K06689|9.63325e-105|osa:4327162|ubiquitin-conjugating enzyme E2 5A	Ubiquitin mediated proteolysis (ko04120);; Protein processing in endoplasmic reticulum (ko04141)	ubiquitin-conjugating enzyme E2 5A [Oryza sativa Japonica Group]
Os01g0692700	0.0789721	-0.584081	Molecular Function: catalytic activity (GO:0003824);; Molecular Function: transition metal ion binding (GO:0046914);;	--	--	unnamed protein product [Oryza sativa Japonica Group]
Os07g0124500	0.25316	0.82815	Molecular Function: protein binding (GO:0005515);; Biological Process: translational initiation (GO:0006413);; Molecular Function: translation factor activity, RNA binding (GO:0008135);; Cellular Component: protein complex (GO:0043234);; Cellular Component: translation preinitiation complex (GO:0070993);;	K03252|0|osa:4342306|eukaryotic translation initiation factor 3 subunit C	RNA transport (ko03013)	eukaryotic translation initiation factor 3 subunit C [Oryza sativa Japonica Group]
Os04g0443200	0.0102581	1.27868	--	--	--	uncharacterized protein LOC4335943 [Oryza sativa Japonica Group]
Os11g0105775	0.566461	-0.55372	--	--	--	protein CHUP1, chloroplastic [Oryza sativa Japonica Group]
Os07g0153400	0.127955	1.71008	--	--	--	hypothetical protein OsI_24933 [Oryza sativa Indica Group]
Os10g0573100	0.123819	-0.72949	Cellular Component: cytoplasm (GO:0005737);;	--	--	uncharacterized protein At2g38710 isoform X2 [Oryza sativa Japonica Group]
Os03g0364400	0.0617772	-1.8126	Molecular Function: protein kinase activity (GO:0004672);; Biological Process: protein phosphorylation (GO:0006468);; Molecular Function: purine ribonucleoside binding (GO:0032550);;	--	--	probable serine/threonine-protein kinase PBL15 [Oryza sativa Japonica Group]
Os03g0283600	0.191234	-0.73053	Biological Process: phospholipid metabolic process (GO:0006644);; Molecular Function: CDP-alcohol phosphatidyltransferase activity (GO:0017169);; Cellular Component: organelle inner membrane (GO:0019866);; Cellular Component: intrinsic component of membrane (GO:0031224);; Cellular Component: intracellular membrane-bounded organelle (GO:0043231);; Cellular Component: cytoplasmic part (GO:0044444);;	K00995|2.91214e-159|osa:4332460|cardiolipin synthase (CMP-forming), mitochondrial	Glycerophospholipid metabolism (ko00564)	cardiolipin synthase (CMP-forming), mitochondrial [Oryza sativa Japonica Group]
Os07g0419200	0.257685	-1.15627	Biological Process: protein oligomerization (GO:0051259);;	--	--	BTB/POZ domain-containing protein At5g41330 [Oryza sativa Japonica Group]
Os03g0194350	0.293387	1.31489	--	--	--	cytochrome b561 and DOMON domain-containing protein At2g04850 [Oryza sativa Japonica Group]
Os04g0438500	0.6128	0.296972	Cellular Component: intrinsic component of membrane (GO:0031224);;	--	--	uncharacterized protein C57A10.07 [Oryza sativa Japonica Group]
Os01g0106200	0.678373	0.247982	--	--	--	protein RER1A [Oryza sativa Japonica Group]
Os01g0566050	0.516903	1.03859	--	K12125|0|osa:4327931|protein EARLY FLOWERING 3	Circadian rhythm - plant (ko04712)	ELF3-like protein 2 [Oryza sativa Japonica Group]
Os07g0584000	0.612812	0.458626	--	--	--	putative yippee-like protein Os10g0369500 [Oryza sativa Japonica Group]
Os05g0323900	0.00482825	2.18633	Molecular Function: catalytic activity (GO:0003824);; Biological Process: superoxide metabolic process (GO:0006801);; Molecular Function: antioxidant activity (GO:0016209);; Molecular Function: cation binding (GO:0043169);; Cellular Component: mitochondrial part (GO:0044429);; Biological Process: single-organism metabolic process (GO:0044710);;	K04564|3.25809e-154|osa:4338417|superoxide dismutase [Mn], mitochondrial	Peroxisome (ko04146)	superoxide dismutase [Mn], mitochondrial [Oryza sativa Japonica Group]
Os02g0597800	0.103564	-0.840474	Biological Process: transcription, DNA-templated (GO:0006351);; Biological Process: hormone-mediated signaling pathway (GO:0009755);; Cellular Component: intrinsic component of membrane (GO:0031224);;	--	--	uncharacterized membrane protein At3g27390 [Oryza sativa Japonica Group]
Os02g0759000	0.106116	-0.957796	--	--	--	Os02g0759000, partial [Oryza sativa Japonica Group]
xxx_newGene_14382	0.648742	0.502279	Biological Process: RNA splicing, via transesterification reactions with bulged adenosine as nucleophile (GO:0000377);; Cellular Component: spliceosomal complex (GO:0005681);; Cellular Component: intrinsic component of membrane (GO:0031224);;	--	--	hypothetical protein OSJNBa0079I01.41 [Oryza sativa Japonica Group]
Os12g0115900	0.469728	0.785247	Biological Process: translation (GO:0006412);; Molecular Function: translation factor activity, RNA binding (GO:0008135);; Cellular Component: intracellular membrane-bounded organelle (GO:0043231);;	K02356|3.02709e-165|osa:4351322|elongation factor P isoform X1	--	uncharacterized protein LOC4351322 isoform X1 [Oryza sativa Japonica Group]
Os05g0354300	0.200349	0.541427	Cellular Component: nuclear ubiquitin ligase complex (GO:0000152);; Biological Process: developmental process involved in reproduction (GO:0003006);; Biological Process: gametophyte development (GO:0048229);; Biological Process: chemical homeostasis (GO:0048878);;	--	--	Os05g0354300, partial [Oryza sativa Japonica Group]
Os08g0187800	0.800805	0.236626	--	K15283|0|osa:4344834|glucose-6-phosphate/phosphate translocator 2, chloroplastic	--	hypothetical protein OsI_28073 [Oryza sativa Indica Group]
CAA33990	0.0483886	-1.363	Biological Process: ATP biosynthetic process (GO:0006754);; Biological Process: hydrogen transport (GO:0006818);; Cellular Component: chloroplast thylakoid (GO:0009534);; Molecular Function: monovalent inorganic cation transmembrane transporter activity (GO:0015077);; Molecular Function: cation-transporting ATPase activity (GO:0019829);; Cellular Component: intrinsic component of membrane (GO:003…	K02108|2.67751e-151|osa:3131393|atpI, OrsajCp019; ATP synthase CF0 A subunit	Oxidative phosphorylation (ko00190);; Photosynthesis (ko00195)	ATP synthase CF0 A subunit (plastid) [Oryza sativa Japonica Group]
Os01g0660200	0.268135	1.13574	Molecular Function: hydrolase activity, hydrolyzing O-glycosyl compounds (GO:0004553);; Biological Process: primary metabolic process (GO:0044238);; Biological Process: organic substance metabolic process (GO:0071704);;	K01183|0|osa:4327172|acidic endochitinase	Amino sugar and nucleotide sugar metabolism (ko00520)	acidic endochitinase [Oryza sativa Japonica Group]
Os04g0655600	0.85859	0.137675	Cellular Component: Golgi apparatus (GO:0005794);; Biological Process: nuclear envelope organization (GO:0006998);; Cellular Component: membrane (GO:0016020);;	--	--	hypothetical protein OsI_17732 [Oryza sativa Indica Group]
Os12g0131100	0.124205	2.06919	--	K00820|0|obr:102717572|glutamine--fructose-6-phosphate aminotransferase [isomerizing] 2-like	Alanine, aspartate and glutamate metabolism (ko00250);; Amino sugar and nucleotide sugar metabolism (ko00520)	PREDICTED: glutamine--fructose-6-phosphate aminotransferase [isomerizing] 2-like [Oryza brachyantha]
Os10g0330300	0.261083	-0.556847	--	--	--	uncharacterized protein LOC4348335 [Oryza sativa Japonica Group]
Os06g0255200	0.718649	0.31869	Biological Process: regulation of response to biotic stimulus (GO:0002831);; Molecular Function: protein binding (GO:0005515);; Cellular Component: cytoplasm (GO:0005737);; Biological Process: jasmonic acid mediated signaling pathway (GO:0009867);; Biological Process: ethylene-activated signaling pathway (GO:0009873);; Biological Process: regulation of gene expression (GO:0010468);; Molecular Fun…	--	--	chromatin remodeling protein-like [Oryza sativa Japonica Group]
Os05g0358500	0.317628	-0.444426	Molecular Function: phosphoprotein phosphatase activity (GO:0004721);; Biological Process: cellular protein modification process (GO:0006464);; Cellular Component: intrinsic component of membrane (GO:0031224);; Molecular Function: cation binding (GO:0043169);;	--	--	probable protein phosphatase 2C 48 isoform X2 [Oryza sativa Japonica Group]
Os10g0534900	0.232052	-1.12534	Molecular Function: nucleic acid binding (GO:0003676);; Biological Process: transcription, DNA-templated (GO:0006351);; Cellular Component: intracellular membrane-bounded organelle (GO:0043231);;	--	--	BEL1-like homeodomain protein 4 [Oryza sativa Japonica Group]
Os10g0320100	7.14732e-05	-2.95198	--	K05280|0|osa:4348304|flavonoid 3'-monooxygenase	Flavonoid biosynthesis (ko00941);; Flavone and flavonol biosynthesis (ko00944)	flavonoid 3&apos;-monooxygenase CYP75B3-like [Oryza sativa Japonica Group]
Os01g0256500	0.0303883	2.80814	Cellular Component: intrinsic component of membrane (GO:0031224);; Cellular Component: intracellular membrane-bounded organelle (GO:0043231);; Biological Process: response to stimulus (GO:0050896);;	--	--	Zn-induced protein [Oryza sativa]
Os09g0525900	0.667413	0.57815	--	--	--	RHOMBOID-like protein 2 [Oryza sativa Japonica Group]
Os12g0169700	0.633732	0.276444	Molecular Function: protein binding (GO:0005515);; Cellular Component: mitochondrial envelope (GO:0005740);; Cellular Component: plastid (GO:0009536);; Biological Process: dehiscence (GO:0009900);; Cellular Component: NADH dehydrogenase complex (GO:0030964);; Biological Process: protein homooligomerization (GO:0051260);; Biological Process: reactive oxygen species metabolic process (GO:0072593);;	K01726|0|osa:4351619|gamma carbonic anhydrase 2, mitochondrial	--	gamma carbonic anhydrase 2, mitochondrial [Oryza sativa Japonica Group]
Os09g0252000	0.662433	0.366495	--	K11600|1.24724e-152|osa:4346519|exosome complex component RRP41 homolog	RNA degradation (ko03018)	exosome complex component RRP41 homolog [Oryza sativa Japonica Group]
Os12g0575200	0.664006	0.38579	--	--	--	mitochondrial import receptor subunit TOM5 homolog [Oryza sativa Japonica Group]
Os07g0660100	0.814639	0.326753	Cellular Component: intrinsic component of membrane (GO:0031224);;	--	--	Os07g0660100 [Oryza sativa Japonica Group]
Os02g0325100	0.183172	1.24464	--	K03063|0|sita:101768297|26S proteasome regulatory subunit 6B homolog	Proteasome (ko03050)	26S proteasome regulatory subunit 6B homolog [Panicum hallii]
Os08g0440200	0.479106	0.53339	Cellular Component: intracellular membrane-bounded organelle (GO:0043231);; Molecular Function: organic cyclic compound binding (GO:0097159);;	K01148|0|osa:4345682|poly(A)-specific ribonuclease PARN-like	RNA degradation (ko03018)	poly(A)-specific ribonuclease PARN-like [Oryza sativa Japonica Group]
Os09g0434100	0.305497	-0.395638	Molecular Function: nucleic acid binding (GO:0003676);; Molecular Function: cation binding (GO:0043169);;	--	--	Os09g0434100 [Oryza sativa Japonica Group]
Os09g0505700	0.422753	0.531295	--	K01783|3.78088e-157|osa:4347508|ribulose-phosphate 3-epimerase, cytoplasmic isoform	Pentose phosphate pathway (ko00030);; Pentose and glucuronate interconversions (ko00040);; Carbon fixation in photosynthetic organisms (ko00710);; Carbon metabolism (ko01200);; Biosynthesis of amino acids (ko01230)	ribulose-phosphate 3-epimerase, cytoplasmic isoform [Oryza sativa Japonica Group]
Os02g0589400	0.0563818	-1.65781	--	--	--	putative UDP-rhamnose:rhamnosyltransferase 1 [Oryza sativa Japonica Group]
Os07g0589600	0.0361425	2.39489	--	--	--	zinc finger CCCH domain-containing protein 18 [Oryza sativa Japonica Group]
Os01g0256800	0.759802	0.309351	--	--	--	zinc finger CCCH domain-containing protein 4 [Oryza sativa Japonica Group]
Os03g0703000	0.492285	0.777006	--	K05350|0|osa:4333841|beta-glucosidase 7	Cyanoamino acid metabolism (ko00460);; Starch and sucrose metabolism (ko00500);; Phenylpropanoid biosynthesis (ko00940)	beta-glucosidase 7 [Oryza sativa Japonica Group]
Os03g0301400	0.0245196	-1.0528	Molecular Function: nuclease activity (GO:0004518);; Biological Process: DNA catabolic process (GO:0006308);; Cellular Component: intracellular membrane-bounded organelle (GO:0043231);; Molecular Function: transition metal ion binding (GO:0046914);; Molecular Function: organic cyclic compound binding (GO:0097159);;	--	--	exonuclease DPD1, chloroplastic/mitochondrial isoform X3 [Oryza sativa Japonica Group]
Os05g0145600	0.00806851	0.920697	Cellular Component: intracellular membrane-bounded organelle (GO:0043231);;	--	--	pentatricopeptide repeat-containing protein At4g35850, mitochondrial [Oryza sativa Japonica Group]
Os11g0181100	0.595196	0.34765	Cellular Component: intrinsic component of membrane (GO:0031224);;	K17087|0|osa:4349939|transmembrane 9 superfamily member 1	--	transmembrane 9 superfamily member 1 [Oryza sativa Japonica Group]
Os05g0103000	0.134459	0.687604	Molecular Function: protein binding (GO:0005515);; Cellular Component: intracellular membrane-bounded organelle (GO:0043231);;	--	--	transcription factor bHLH63 isoform X1 [Oryza sativa Japonica Group]
Os10g0135250	0.303507	0.922144	--	--	--	Hypothetical protein [Oryza sativa Japonica Group]
Os05g0453500	0.493022	0.540467	--	--	--	unknown protein [Oryza sativa Japonica Group]
Os10g0389200	0.000210431	2.16114	Cellular Component: intracellular membrane-bounded organelle (GO:0043231);;	K13545|2.11021e-172|osa:4348519|red chlorophyll catabolite reductase	Porphyrin and chlorophyll metabolism (ko00860)	red chlorophyll catabolite reductase [Oryza sativa Japonica Group]
Os01g0176700	0.200577	-0.632208	--	--	--	hypothetical protein EE612_000570, partial [Oryza sativa]
Os12g0257500	0.303507	0.798341	Cellular Component: intrinsic component of membrane (GO:0031224);;	--	--	uncharacterized protein LOC4351910 [Oryza sativa Japonica Group]
Os08g0499000	0.506202	0.618728	--	--	--	trinucleotide repeat-containing gene 18 protein [Oryza sativa Japonica Group]
Os10g0391100	0.74256	0.220768	Molecular Function: transcription factor activity, transcription factor binding (GO:0000989);; Cellular Component: SAGA-type complex (GO:0070461);; Biological Process: nucleic acid-templated transcription (GO:0097659);;	--	--	uncharacterized protein LOC4348528 [Oryza sativa Japonica Group]
Os01g0375000	0.239591	0.778446	--	K14538|0|osa:4325442|guanine nucleotide-binding protein-like NSN1	Ribosome biogenesis in eukaryotes (ko03008)	guanine nucleotide-binding protein-like NSN1 [Oryza sativa Japonica Group]
xxx_newGene_842	0.447248	-0.375362	Molecular Function: catalytic activity (GO:0003824);; Molecular Function: electron carrier activity (GO:0009055);; Cellular Component: chloroplast thylakoid (GO:0009534);; Biological Process: electron transport chain (GO:0022900);; Cellular Component: intrinsic component of membrane (GO:0031224);; Cellular Component: photosynthetic membrane (GO:0034357);; Molecular Function: tetrapyrrole binding …	K02635|9.92374e-178|hbr:110657141|uncharacterized protein LOC110657141	Photosynthesis (ko00195)	uncharacterized protein LOC110657141 [Hevea brasiliensis]
Os01g0686800	5.96358e-06	1.63984	--	K14753|0|osa:4324115|guanine nucleotide-binding protein subunit beta-like protein A	--	guanine nucleotide-binding protein subunit beta-like protein A [Oryza sativa Japonica Group]
Os06g0608800	0.403621	0.784951	--	K16280|0|osa:4341497|E3 ubiquitin-protein ligase RGLG2 isoform X1	--	unknown protein [Oryza sativa Japonica Group]
Os02g0649300	8.80356e-21	7.8038	Molecular Function: nucleic acid binding transcription factor activity (GO:0001071);; Molecular Function: DNA binding (GO:0003677);; Biological Process: transcription, DNA-templated (GO:0006351);; Cellular Component: intracellular membrane-bounded organelle (GO:0043231);;	--	--	homeobox-leucine zipper protein HOX24 [Oryza sativa Japonica Group]
Os04g0662700	0.0137776	-1.07172	--	K01495|0|osa:4337297|GTP cyclohydrolase 1	Folate biosynthesis (ko00790);; Biosynthesis of cofactors (ko01240)	LOW QUALITY PROTEIN: GTP cyclohydrolase 1 [Oryza sativa Japonica Group]
Os01g0548600	7.77316e-07	7.02406	--	--	--	Os01g0548600, partial [Oryza sativa Japonica Group]
Os02g0535700	0.279621	0.374408	--	--	--	Os02g0535700 [Oryza sativa Japonica Group]
Os03g0628800	0.0429882	-1.61596	Biological Process: phosphate-containing compound metabolic process (GO:0006796);; Molecular Function: transferase activity, transferring phosphorus-containing groups (GO:0016772);; Molecular Function: purine ribonucleoside binding (GO:0032550);;	--	--	uncharacterized protein LOC4333506 [Oryza sativa Japonica Group]
Os03g0735000	0.0808238	-1.15863	Biological Process: glycogen metabolic process (GO:0005977);; Biological Process: starch metabolic process (GO:0005982);; Cellular Component: plastid (GO:0009536);; Molecular Function: purine ribonucleoside binding (GO:0032550);; Molecular Function: adenylyltransferase activity (GO:0070566);;	K00975|0|osa:4334020|glucose-1-phosphate adenylyltransferase large subunit	Starch and sucrose metabolism (ko00500);; Amino sugar and nucleotide sugar metabolism (ko00520)	glucose-1-phosphate adenylyltransferase large subunit 1, chloroplastic/amyloplastic-like [Oryza sativa Japonica Group]
Os01g0805300	0.24686	-0.851852	Cellular Component: photosystem II (GO:0009523);; Biological Process: cellular metabolic process (GO:0044237);; Molecular Function: metal ion binding (GO:0046872);;	--	--	psbP domain-containing protein 6, chloroplastic [Oryza sativa Japonica Group]
Os03g0405100	0.188181	0.625083	--	K18587|1.49317e-154|osa:4333072|ubiquinone biosynthesis protein COQ9-B, mitochondrial	--	ubiquinone biosynthesis protein COQ9-B, mitochondrial [Oryza sativa Japonica Group]
Os02g0586500	0.0385875	0.677092	--	--	--	Os02g0586500 [Oryza sativa Japonica Group]
Os02g0115700	0.183636	-1.94217	--	K03781|0|osa:4328073|catalase isozyme A	Tryptophan metabolism (ko00380);; Glyoxylate and dicarboxylate metabolism (ko00630);; Carbon metabolism (ko01200);; MAPK signaling pathway - plant (ko04016);; Peroxisome (ko04146)	catalase isozyme A [Oryza sativa Japonica Group]
Os09g0482000	0.00236554	1.96556	Cellular Component: intracellular membrane-bounded organelle (GO:0043231);;	--	--	plant UBX domain-containing protein 10 [Oryza sativa Japonica Group]
Os06g0186600	0.669227	0.432321	--	--	--	uncharacterized protein LOC4340346 [Oryza sativa Japonica Group]
Os04g0582000	0.000407993	2.66949	--	--	--	Os04g0582000 [Oryza sativa Japonica Group]
Os02g0203000	0.000225244	-1.85608	--	K16241|1.69391e-95|osa:4328662|transcription factor HY5	Circadian rhythm - plant (ko04712)	transcription factor HY5 [Oryza sativa Japonica Group]
Os12g0625000	0.014527	-1.05253	--	--	--	Os12g0625000, partial [Oryza sativa Japonica Group]
Os02g0601100	0.0377103	2.12743	Biological Process: sulfur compound metabolic process (GO:0006790);; Molecular Function: purine ribonucleoside binding (GO:0032550);; Molecular Function: cation binding (GO:0043169);; Cellular Component: intracellular part (GO:0044424);; Molecular Function: iron-sulfur cluster binding (GO:0051536);;	--	--	Os02g0601100, partial [Oryza sativa Japonica Group]
Os03g0748700	0.102043	1.70516	Cellular Component: cytoplasm (GO:0005737);; Biological Process: response to abiotic stimulus (GO:0009628);; Cellular Component: intracellular membrane-bounded organelle (GO:0043231);;	--	--	protein NAR1 [Oryza sativa Japonica Group]
Os08g0472000	0.105009	1.14975	Molecular Function: regulatory region DNA binding (GO:0000975);; Molecular Function: nucleic acid binding transcription factor activity (GO:0001071);; Biological Process: transcription, DNA-templated (GO:0006351);; Biological Process: hormone-mediated signaling pathway (GO:0009755);; Cellular Component: intracellular membrane-bounded organelle (GO:0043231);;	K14432|6.23908e-172|osa:4345807|bZIP transcription factor TRAB1	Plant hormone signal transduction (ko04075)	bZIP transcription factor TRAB1 [Oryza sativa Japonica Group]
Os01g0591000	0.953639	0.0737872	--	K12355|0|osa:4326375|aldehyde dehydrogenase family 2 member C4	Phenylpropanoid biosynthesis (ko00940)	aldehyde dehydrogenase family 2 member C4 [Oryza sativa Japonica Group]
Os08g0512400	0.0976661	1.00476	Molecular Function: nucleic acid binding (GO:0003676);; Cellular Component: intracellular membrane-bounded organelle (GO:0043231);;	--	--	Os08g0512400, partial [Oryza sativa Japonica Group]
Os03g0657100	0.668359	0.441857	Molecular Function: ubiquitin-like protein transferase activity (GO:0019787);; Biological Process: protein modification by small protein conjugation (GO:0032446);;	--	--	U-box domain-containing protein 44 [Oryza sativa Japonica Group]
Os05g0309000	0.393761	-1.25337	Biological Process: protein metabolic process (GO:0019538);; Molecular Function: peptidase activity, acting on L-amino acid peptides (GO:0070011);;	--	--	Os05g0309000 [Oryza sativa Japonica Group]
Os03g0743400	0.393777	0.614574	--	K11251|4.22339e-76|sita:101783345|probable histone H2A variant 3	--	probable histone H2A variant 3 [Setaria italica]
Os03g0780900	0.436789	0.338227	--	--	--	alpha N-terminal protein methyltransferase 1 isoform X2 [Oryza sativa Japonica Group]
Os04g0485800	0.0356496	2.48934	--	--	--	F-box protein SKIP14 [Oryza sativa Japonica Group]
Os03g0715500	0.649027	0.239557	--	K20183|0|osa:4333909|vam6/Vps39-like protein	--	vacuolar sorting protein 39 isoform X1 [Oryza sativa Japonica Group]
Os04g0688000	0.422638	1.01549	Cellular Component: intrinsic component of membrane (GO:0031224);; Cellular Component: intracellular membrane-bounded organelle (GO:0043231);;	--	--	Os04g0688000 [Oryza sativa Japonica Group]
Os07g0458700	0.308905	0.746854	--	--	--	sigma intracellular receptor 2 [Oryza sativa Japonica Group]
Os01g0927600	0.310506	0.494868	Molecular Function: nucleic acid binding (GO:0003676);; Biological Process: transcription, DNA-templated (GO:0006351);; Biological Process: hormone-mediated signaling pathway (GO:0009755);; Cellular Component: intracellular membrane-bounded organelle (GO:0043231);;	--	--	hypothetical protein OsI_05027 [Oryza sativa Indica Group]
Os05g0471000	0.0841608	1.69588	Biological Process: cellular protein modification process (GO:0006464);; Molecular Function: kinase activity (GO:0016301);; Cellular Component: intrinsic component of membrane (GO:0031224);; Molecular Function: purine ribonucleoside binding (GO:0032550);;	--	--	protein MALE DISCOVERER 2 isoform X2 [Oryza sativa Japonica Group]
Os05g0326675	0.65485	0.539967	Molecular Function: nucleic acid binding (GO:0003676);;	--	--	Os05g0326675 [Oryza sativa Japonica Group]
Os05g0577800	0.352659	0.492459	Cellular Component: mitochondrial outer membrane (GO:0005741);;	--	--	uncharacterized protein LOC4339703 [Oryza sativa Japonica Group]
Os06g0127700	0.104769	1.54911	Biological Process: transport (GO:0006810);; Cellular Component: intrinsic component of membrane (GO:0031224);;	--	--	oligopeptide transporter 7 isoform X1 [Oryza sativa Japonica Group]
xxx_newGene_1567	0.665262	0.426051	Biological Process: ATP biosynthetic process (GO:0006754);; Molecular Function: monovalent inorganic cation transmembrane transporter activity (GO:0015077);; Biological Process: energy coupled proton transmembrane transport, against electrochemical gradient (GO:0015988);; Cellular Component: intrinsic component of membrane (GO:0031224);; Cellular Component: proton-transporting two-sector ATPase c…	K02128|4.34373e-41|osa:107279585|ATP synthase subunit 9, mitochondrial	Oxidative phosphorylation (ko00190)	ATP synthase subunit C family protein [Oryza sativa Japonica Group]
Os08g0440100	0.357788	-1.63335	Cellular Component: cell-cell junction (GO:0005911);; Biological Process: hyperosmotic response (GO:0006972);; Biological Process: response to radiation (GO:0009314);; Biological Process: response to hormone (GO:0009725);; Cellular Component: membrane (GO:0016020);; Cellular Component: vacuolar part (GO:0044437);; Biological Process: establishment of localization (GO:0051234);;	K03098|5.19355e-129|osa:4345681|temperature-induced lipocalin-1	--	temperature-induced lipocalin-1 [Oryza sativa Japonica Group]
Os06g0600301	0.00248655	2.62249	--	--	--	RecName: Full=GTP-binding nuclear protein Ran-3; Short=OsRan3; AltName: Full=Ras-related nuclear protein 3
Os07g0558200	0.165396	-1.07247	--	K01082|0|osa:4343581|putative PAP-specific phosphatase, mitochondrial	Sulfur metabolism (ko00920)	hypothetical protein OsJ_24719 [Oryza sativa Japonica Group]
Os03g0718100	0.359949	0.377371	Molecular Function: purine ribonucleoside binding (GO:0032550);; Cellular Component: intracellular non-membrane-bounded organelle (GO:0043232);;	K10355|0|osa:4333919|actin-1	--	hypothetical protein EJB05_04864, partial [Eragrostis curvula]
xxx_newGene_7257	0.349808	0.517824	Molecular Function: endoribonuclease activity, producing 5'-phosphomonoesters (GO:0016891);; Molecular Function: DNA polymerase activity (GO:0034061);; Biological Process: DNA biosynthetic process (GO:0071897);; Biological Process: RNA phosphodiester bond hydrolysis (GO:0090501);; Molecular Function: organic cyclic compound binding (GO:0097159);;	--	--	putative reverse transcriptase [Oryza sativa Japonica Group]
Os03g0213700	0.494488	0.305829	Cellular Component: intrinsic component of membrane (GO:0031224);;	--	--	hypothetical protein OsJ_09902 [Oryza sativa Japonica Group]
Os01g0265200	0.160488	0.975545	--	K14684|0|osa:4326209|thylakoid ADP,ATP carrier protein, chloroplastic	--	thylakoid ADP,ATP carrier protein, chloroplastic [Oryza sativa Japonica Group]
xxx_newGene_4495	0.102716	1.6947	Cellular Component: intracellular membrane-bounded organelle (GO:0043231);;	--	--	circumsporozoite protein-like protein [Oryza sativa Japonica Group]
Os03g0650700	0.342596	0.682639	--	K14536|0|osa:4333588|elongation factor Tu GTP-binding domain-containing protein 1	Ribosome biogenesis in eukaryotes (ko03008)	elongation factor-like GTPase 1 [Oryza sativa Japonica Group]
Os10g0511900	0.593569	0.436502	Molecular Function: nucleic acid binding (GO:0003676);; Cellular Component: intracellular membrane-bounded organelle (GO:0043231);; Molecular Function: transition metal ion binding (GO:0046914);;	--	--	zinc finger CCCH domain-containing protein 19 isoform X2 [Oryza sativa Japonica Group]
Os09g0454100	0.28789	-0.577482	--	--	--	RHOMBOID-like protein 10, chloroplastic [Oryza sativa Japonica Group]
Os05g0373300	0.765719	0.384306	Molecular Function: phospholipid binding (GO:0005543);; Biological Process: cell death (GO:0008219);;	--	--	protein BONZAI 3 isoform X1 [Oryza sativa Japonica Group]
Os05g0390000	0.0731265	-1.61836	Molecular Function: nucleic acid binding transcription factor activity (GO:0001071);; Molecular Function: nucleic acid binding (GO:0003676);; Molecular Function: catalytic activity (GO:0003824);; Biological Process: transcription, DNA-templated (GO:0006351);; Cellular Component: intracellular membrane-bounded organelle (GO:0043231);; Biological Process: single-multicellular organism process (GO:0…	--	--	phospholipase A1-Igamma1, chloroplastic [Oryza sativa Japonica Group]
Os05g0468550	0.326766	1.31197	Molecular Function: nucleotidyltransferase activity (GO:0016779);; Cellular Component: intracellular membrane-bounded organelle (GO:0043231);;	--	--	Os05g0468600 [Oryza sativa Japonica Group]
Os09g0397300	0.0013767	1.40197	--	--	--	putative trehalose-6-phosphate synthase/phosphatase [Oryza sativa Japonica Group]
Os07g0421866	0.197954	0.526264	--	--	--	Os07g0421866 [Oryza sativa Japonica Group]
Os08g0406400	0.0144742	-0.993011	--	--	--	sulfate transporter 1.2 isoform X2 [Oryza sativa Japonica Group]
Os01g0672400	0.687818	0.440853	--	--	--	protein DEHYDRATION-INDUCED 19 homolog 3 [Oryza sativa Japonica Group]
Os10g0564000	0.571791	0.360307	Molecular Function: nucleic acid binding (GO:0003676);;	K21444|0|osa:4349406|RNA-binding KH domain-containing protein PEPPER	--	RNA-binding KH domain-containing protein PEPPER [Oryza sativa Japonica Group]
Os03g0237600	0.827296	0.124854	Biological Process: microtubule-based process (GO:0007017);; Molecular Function: tubulin binding (GO:0015631);; Biological Process: cell cycle process (GO:0022402);;	K16732|0|osa:4332190|65-kDa microtubule-associated protein 6	--	Unknown protein [Oryza sativa Japonica Group]
Os05g0172100	0.995829	-0.00425168	--	--	--	uncharacterized protein LOC4337948 [Oryza sativa Japonica Group]
Os01g0874800	0.0310831	1.31952	--	--	--	putative DNA polymerase I 3&apos;-5&apos; exo domain [Oryza sativa Japonica Group]
Os04g0443700	0.694579	0.276552	Cellular Component: intrinsic component of membrane (GO:0031224);;	--	--	Os04g0443700, partial [Oryza sativa Japonica Group]
Os01g0200300	0.00145712	1.94867	Molecular Function: nucleic acid binding (GO:0003676);; Biological Process: transcription, DNA-templated (GO:0006351);; Cellular Component: intracellular membrane-bounded organelle (GO:0043231);;	K09338|0|osa:4327348|homeobox-leucine zipper protein HOX29	--	homeobox-leucine zipper protein HOX29 [Oryza sativa Japonica Group]
Os12g0235800	0.0751513	0.693815	--	K01940|0|osa:4351847|argininosuccinate synthase, chloroplastic	Arginine biosynthesis (ko00220);; Alanine, aspartate and glutamate metabolism (ko00250);; Biosynthesis of amino acids (ko01230)	argininosuccinate synthase, chloroplastic [Oryza sativa Japonica Group]
Os09g0509350	0.846031	0.129466	Cellular Component: intracellular membrane-bounded organelle (GO:0043231);;	--	--	uncharacterized protein At2g33490 isoform X2 [Oryza sativa Japonica Group]
Os04g0518000	0.183636	1.46547	Biological Process: purine ribonucleotide biosynthetic process (GO:0009152);; Molecular Function: phosphotransferase activity, alcohol group as acceptor (GO:0016773);; Biological Process: purine-containing compound salvage (GO:0043101);;	K00856|0|osa:4336412|adenosine kinase 2	Purine metabolism (ko00230)	adenosine kinase 2 isoform X1 [Oryza sativa Japonica Group]
Os05g0212400	0.221127	-0.930126	--	--	--	Os05g0212400, partial [Oryza sativa Japonica Group]
Os03g0130300	1.26574e-11	8.46806	Biological Process: cell killing (GO:0001906);; Biological Process: response to stress (GO:0006950);; Biological Process: response to fungus (GO:0009620);; Cellular Component: intrinsic component of membrane (GO:0031224);;	--	--	defensin-like protein [Oryza sativa Japonica Group]
Os01g0921800	0.000397025	-1.44763	Cellular Component: intracellular membrane-bounded organelle (GO:0043231);;	--	--	hypothetical protein OsI_04973 [Oryza sativa Indica Group]
Os01g0265900	0.411026	0.635985	--	--	--	translin-associated protein X [Oryza sativa Japonica Group]
Os10g0495200	0.445492	-0.639904	Molecular Function: transferase activity (GO:0016740);; Cellular Component: intracellular membrane-bounded organelle (GO:0043231);;	--	--	Rf1 protein, mitochondrial precursor, putative, expressed [Oryza sativa Japonica Group]
Os07g0109400	0.101369	-1.29081	Biological Process: monopolar cell growth (GO:0042814);;	--	--	protein LONGIFOLIA 1 isoform X1 [Oryza sativa Japonica Group]
Os06g0367100	0.284243	0.896311	Biological Process: glycogen metabolic process (GO:0005977);; Molecular Function: transferase activity, transferring hexosyl groups (GO:0016758);; Molecular Function: hydrolase activity, acting on glycosyl bonds (GO:0016798);; Molecular Function: ion binding (GO:0043167);; Cellular Component: intracellular membrane-bounded organelle (GO:0043231);;	--	--	1,4-alpha-glucan-branching enzyme 3, chloroplastic/amyloplastic isoform X2 [Oryza sativa Japonica Group]
Os03g0767000	0.0599151	-2.20502	--	K01723|0|osa:4334233|allene oxide synthase 1, chloroplastic	alpha-Linolenic acid metabolism (ko00592)	allene oxide synthase 1, chloroplastic [Oryza sativa Japonica Group]
Os06g0278000	0.350719	-1.58806	--	--	--	Os06g0278000 [Oryza sativa Japonica Group]
Os08g0242800	0.448064	-0.759696	Molecular Function: nucleic acid binding transcription factor activity (GO:0001071);; Molecular Function: nucleic acid binding (GO:0003676);; Biological Process: transcription, DNA-templated (GO:0006351);; Biological Process: response to light stimulus (GO:0009416);; Cellular Component: plastid (GO:0009536);; Biological Process: post-embryonic development (GO:0009791);; Molecular Function: sigma …	--	--	RNA polymerase sigma factor sigF, chloroplastic [Oryza sativa Japonica Group]
Os01g0235350	0.437988	0.615695	Cellular Component: cytoplasm (GO:0005737);; Cellular Component: cell-cell junction (GO:0005911);; Biological Process: protein transport (GO:0015031);; Molecular Function: Ras GTPase binding (GO:0017016);; Cellular Component: intrinsic component of membrane (GO:0031224);;	--	--	Os01g0235350 [Oryza sativa Japonica Group]
Os01g0847900	0.392709	0.719307	Cellular Component: intrinsic component of membrane (GO:0031224);;	K20393|2.45075e-128|osa:4327478|PRA1 family protein A1	--	PRA1 family protein A1 [Oryza sativa Japonica Group]
Os05g0212200	0.736168	0.191287	--	--	--	uncharacterized protein LOC4338099 [Oryza sativa Japonica Group]
Os06g0367500	0.187544	-0.922978	Biological Process: protein transport (GO:0015031);; Cellular Component: intrinsic component of membrane (GO:0031224);; Cellular Component: intracellular membrane-bounded organelle (GO:0043231);;	--	--	Os06g0367500, partial [Oryza sativa Japonica Group]
Os08g0378900	0.322969	0.721369	--	--	--	thioredoxin-like protein CITRX, chloroplastic [Oryza sativa Japonica Group]
Os08g0203900	0.895145	-0.119992	Cellular Component: intrinsic component of membrane (GO:0031224);;	--	--	GDP-fucose transporter 1 [Oryza sativa Japonica Group]
xxx_newGene_12236	0.107047	1.06477	Molecular Function: nucleic acid binding (GO:0003676);;	K09422|5.1465e-104|osa:4347052|myb-related protein 306	--	myb-related protein 306 [Oryza sativa Japonica Group]
Os08g0122000	0.352783	0.614987	Biological Process: cell communication (GO:0007154);; Cellular Component: protein serine/threonine phosphatase complex (GO:0008287);; Biological Process: regulation of phosphoprotein phosphatase activity (GO:0043666);;	K11584|0|osa:4344549|serine/threonine protein phosphatase 2A 57 kDa regulatory subunit B' theta isoform	mRNA surveillance pathway (ko03015)	serine/threonine protein phosphatase 2A 57 kDa regulatory subunit B&apos; theta isoform [Oryza sativa Japonica Group]
Os08g0244500	3.0037e-05	6.84075	--	--	--	Os08g0244500 [Oryza sativa Japonica Group]
Os04g0115500	0.346254	-1.47884	Molecular Function: transferase activity, transferring pentosyl groups (GO:0016763);; Molecular Function: cation binding (GO:0043169);; Cellular Component: intracellular membrane-bounded organelle (GO:0043231);;	--	--	uncharacterized protein LOC4334944 [Oryza sativa Japonica Group]
Os05g0582100	0.254356	-0.474544	Molecular Function: catalytic activity (GO:0003824);; Cellular Component: intrinsic component of membrane (GO:0031224);;	K03377|0|osa:4339732|protein REDUCED WALL ACETYLATION 3	--	protein REDUCED WALL ACETYLATION 3 [Oryza sativa Japonica Group]
Os09g0361400	0.190551	0.579411	Molecular Function: voltage-gated ion channel activity (GO:0005244);; Biological Process: anion transport (GO:0006820);; Cellular Component: integral component of membrane (GO:0016021);; Molecular Function: wide pore channel activity (GO:0022829);; Cellular Component: mitochondrial membrane (GO:0031966);; Biological Process: regulation of ion transmembrane transport (GO:0034765);;	K15040|1.58519e-57|osa:4346851|mitochondrial outer membrane protein porin 1	--	unnamed protein product [Oryza sativa Japonica Group]
Os12g0154600	0.84423	0.111563	Cellular Component: intrinsic component of membrane (GO:0031224);;	--	--	UDP-rhamnose/UDP-galactose transporter 4 [Oryza sativa Japonica Group]
Os02g0824700	0.118315	-0.917536	--	K02151|3.43698e-87|osa:4335014|V-type proton ATPase subunit F	Oxidative phosphorylation (ko00190);; Phagosome (ko04145)	PREDICTED: V-type proton ATPase subunit F [Oryza brachyantha]
Os07g0658100	0.98074	0.0331705	Cellular Component: intrinsic component of membrane (GO:0031224);; Cellular Component: intracellular membrane-bounded organelle (GO:0043231);;	--	--	uncharacterized protein LOC4344161 [Oryza sativa Japonica Group]
Os11g0156700	0.730642	0.168234	Cellular Component: intrinsic component of membrane (GO:0031224);; Cellular Component: intracellular membrane-bounded organelle (GO:0043231);;	--	--	growth/differentiation factor 7 [Oryza sativa Japonica Group]
Os05g0486700	0.201761	0.808379	--	K02896|5.08378e-79|osa:4339145|60S ribosomal protein L24	Ribosome (ko03010)	60S ribosomal protein L24 [Oryza sativa Japonica Group]
Os02g0679500	0.611925	0.288201	Biological Process: cell communication (GO:0007154);; Cellular Component: plant-type cell wall (GO:0009505);; Cellular Component: membrane (GO:0016020);; Biological Process: cell wall organization (GO:0071555);;	--	--	hypothetical protein OsJ_07928 [Oryza sativa Japonica Group]
Os07g0665900	0.452426	0.628203	--	--	--	uncharacterized protein LOC4344214 [Oryza sativa Japonica Group]
Os03g0748300	0.0228208	1.85491	Molecular Function: binding (GO:0005488);; Cellular Component: plastid (GO:0009536);; Biological Process: photosynthetic electron transport chain (GO:0009767);; Biological Process: gene expression (GO:0010467);; Biological Process: primary metabolic process (GO:0044238);;	--	--	protein NDH-DEPENDENT CYCLIC ELECTRON FLOW 5 [Oryza sativa Japonica Group]
Os12g0233300	0.478107	-0.627044	Molecular Function: catalytic activity (GO:0003824);; Biological Process: cellular metabolic process (GO:0044237);;	--	--	adenylylsulfatase HINT3 [Oryza sativa Japonica Group]
Os07g0160800	0.243488	-1.52409	--	--	--	fasciclin-like arabinogalactan protein 15 [Oryza sativa Japonica Group]
Os03g0132300	0.0932138	0.96881	--	--	--	putative HVA22-like protein g [Oryza sativa Japonica Group]
Os04g0539000	0.314578	-0.858128	Cellular Component: chloroplast thylakoid (GO:0009534);; Molecular Function: oxidoreductase activity, acting on NAD(P)H (GO:0016651);; Biological Process: single-organism metabolic process (GO:0044710);; Molecular Function: cofactor binding (GO:0048037);; Biological Process: establishment of localization (GO:0051234);;	--	--	NAD(P)H-quinone oxidoreductase subunit M, chloroplastic [Oryza sativa Japonica Group]
Os08g0179400	0.0609916	-1.19319	--	--	--	transcription factor bHLH112 isoform X2 [Oryza sativa Japonica Group]
Os01g0825800	0.241948	-1.08467	Cellular Component: intrinsic component of membrane (GO:0031224);;	--	--	amino acid transporter AVT6C isoform X2 [Oryza sativa Japonica Group]
Os04g0165400	0.455243	0.361322	Cellular Component: intrinsic component of membrane (GO:0031224);;	K20362|0|osa:4335045|protein YIF1B	--	hypothetical protein OsI_14805 [Oryza sativa Indica Group]
Os08g0493900	0.0215572	0.878535	--	K11374|0|osa:4345916|elongator complex protein 2	--	elongator complex protein 2 [Oryza sativa Japonica Group]
Os04g0620700	0.47386	0.381135	Molecular Function: nucleic acid binding (GO:0003676);; Cellular Component: nuclear lumen (GO:0031981);; Molecular Function: small molecule binding (GO:0036094);; Biological Process: ribosome biogenesis (GO:0042254);;	K11294|0|osa:4337032|nucleolin 2	--	nucleolin 2 [Oryza sativa Japonica Group]
Os01g0143300	0.0775547	1.10124	Cellular Component: mitochondrial part (GO:0044429);;	K15414|1.59704e-133|osa:4325458|uncharacterized protein At2g39795, mitochondrial	--	hypothetical protein OsI_00351 [Oryza sativa Indica Group]
Os02g0572200	0.353451	1.06978	--	K10664|5.41116e-105|osa:4329732|E3 ubiquitin-protein ligase ATL6	--	E3 ubiquitin-protein ligase ATL6 [Oryza sativa Japonica Group]
Os03g0202500	0.694214	0.407863	--	--	--	uncharacterized protein LOC4331980 isoform X2 [Oryza sativa Japonica Group]
Os08g0480500	0.803963	0.122606	Molecular Function: transcription factor activity, RNA polymerase II transcription factor binding (GO:0001076);; Biological Process: transcription from RNA polymerase II promoter (GO:0006366);; Cellular Component: protein complex (GO:0043234);;	K15139|2.50171e-85|osa:4345849|mediator of RNA polymerase II transcription subunit 22a	--	mediator of RNA polymerase II transcription subunit 22a [Oryza sativa Japonica Group]
xxx_newGene_8773	0.978977	-0.0238031	Cellular Component: intracellular membrane-bounded organelle (GO:0043231);;	--	--	XS domain containing protein-like [Oryza sativa Japonica Group]
Os12g0628500	0.240873	0.701619	Molecular Function: aminopeptidase activity (GO:0004177);; Biological Process: cellular protein modification process (GO:0006464);; Molecular Function: metallopeptidase activity (GO:0008237);; Cellular Component: intrinsic component of membrane (GO:0031224);; Molecular Function: cation binding (GO:0043169);; Cellular Component: intracellular part (GO:0044424);;	--	--	Os12g0628500, partial [Oryza sativa Japonica Group]
Os07g0647500	0.455392	0.399214	Cellular Component: intrinsic component of membrane (GO:0031224);; Cellular Component: intracellular membrane-bounded organelle (GO:0043231);;	--	--	uncharacterized protein LOC4344110 [Oryza sativa Japonica Group]
Os01g0922000	0.221634	-1.43357	Biological Process: vesicle-mediated transport (GO:0016192);; Cellular Component: protein complex (GO:0043234);;	K07195|0|osa:107275956|exocyst complex component EXO70A1-like	--	hypothetical protein OsJ_04582 [Oryza sativa Japonica Group]
Os02g0710900	0.498168	0.562143	--	K09486|0|osa:4330492|heat shock 70 kDa protein 17	Protein processing in endoplasmic reticulum (ko04141)	heat shock 70 kDa protein 17 [Oryza sativa Japonica Group]
Os06g0489500	0.758283	0.262934	--	K11991|0|osa:4341078|tRNA(adenine(34)) deaminase, chloroplastic isoform X1	--	tRNA(adenine(34)) deaminase, chloroplastic isoform X1 [Oryza sativa Japonica Group]
Os11g0679700	0.0831842	2.84636	--	--	--	Os11g0679700, partial [Oryza sativa Japonica Group]
Os07g0152900	0.189655	-0.84309	Molecular Function: (S)-2-hydroxy-acid oxidase activity (GO:0003973);; Biological Process: photorespiration (GO:0009853);; Biological Process: photosynthesis (GO:0015979);; Biological Process: viral process (GO:0016032);; Molecular Function: ribonucleotide binding (GO:0032553);; Cellular Component: microbody (GO:0042579);; Biological Process: single-organism metabolic process (GO:0044710);;	K11517|0|osa:4342420|peroxisomal (S)-2-hydroxy-acid oxidase GLO5 isoform X1	Glyoxylate and dicarboxylate metabolism (ko00630);; Carbon metabolism (ko01200);; Peroxisome (ko04146)	peroxisomal (S)-2-hydroxy-acid oxidase GLO5 isoform X1 [Oryza sativa Japonica Group]
Os12g0124000	0.220108	-1.08383	Cellular Component: intracellular membrane-bounded organelle (GO:0043231);;	--	--	Os12g0124000, partial [Oryza sativa Japonica Group]
Os04g0555000	0.107323	-0.720559	--	--	--	scarecrow-like protein 27 [Oryza sativa Japonica Group]
Os07g0258700	0.450599	0.685033	--	K10523|7.21424e-130|osa:4342863|BTB/POZ domain-containing protein At4g08455	--	BTB/POZ domain-containing protein At4g08455 [Oryza sativa Japonica Group]
Os03g0811100	0.749517	0.337084	Biological Process: porphyrin-containing compound biosynthetic process (GO:0006779);; Cellular Component: chloroplast (GO:0009507);; Cellular Component: plastid stroma (GO:0009532);; Molecular Function: purine ribonucleoside binding (GO:0032550);; Molecular Function: ligase activity, forming nitrogen-metal bonds, forming coordination complexes (GO:0051003);;	K03404|0|osa:4334537|magnesium-chelatase subunit ChlD, chloroplastic	Porphyrin and chlorophyll metabolism (ko00860)	magnesium-chelatase subunit ChlD, chloroplastic [Oryza sativa Japonica Group]
Os07g0112800	0.68503	0.235161	Biological Process: translational elongation (GO:0006414);; Biological Process: translational termination (GO:0006415);; Molecular Function: translation factor activity, RNA binding (GO:0008135);; Molecular Function: ribonucleoprotein complex binding (GO:0043021);;	K03263|1.55983e-101|osa:4342241|eukaryotic translation initiation factor 5A-4	--	eukaryotic translation initiation factor 5A-4 [Oryza sativa Japonica Group]
Os06g0107700	0.184014	-1.06559	Biological Process: generation of precursor metabolites and energy (GO:0006091);; Cellular Component: plastid stroma (GO:0009532);; Cellular Component: chloroplast thylakoid (GO:0009534);; Molecular Function: oxidoreductase activity, acting on iron-sulfur proteins as donors, NAD or NADP as acceptor (GO:0016731);; Biological Process: single-organism metabolic process (GO:0044710);;	K02641|0|osa:4339874|ferredoxin--NADP reductase, leaf isozyme, chloroplastic	Photosynthesis (ko00195)	ferredoxin--NADP reductase, leaf isozyme 1, chloroplastic [Oryza sativa Japonica Group]
Os03g0121200	0.103579	-1.43579	Molecular Function: catalytic activity (GO:0003824);; Biological Process: response to stress (GO:0006950);; Molecular Function: antioxidant activity (GO:0016209);; Biological Process: hydrogen peroxide metabolic process (GO:0042743);; Molecular Function: cation binding (GO:0043169);; Cellular Component: intracellular membrane-bounded organelle (GO:0043231);; Biological Process: single-organism me…	K00430|8.73195e-35|osa:4331437|peroxidase 5	Phenylpropanoid biosynthesis (ko00940)	Os03g0121200 [Oryza sativa Japonica Group]
Os11g0672800	0.0180495	2.83337	Cellular Component: intrinsic component of membrane (GO:0031224);; Cellular Component: intracellular membrane-bounded organelle (GO:0043231);;	--	--	hypothetical protein OsJ_00136 [Oryza sativa Japonica Group]
Os03g0683700	0.382496	-0.440312	Cellular Component: cell-cell junction (GO:0005911);; Biological Process: establishment of localization (GO:0051234);;	--	--	protein unc-13 homolog [Oryza sativa Japonica Group]
Os03g0188500	0.0259578	4.39267	--	--	--	hypothetical protein OsJ_09711 [Oryza sativa Japonica Group]
Os04g0606000	0.000467405	4.98708	Molecular Function: transferase activity, transferring acyl groups (GO:0016746);; Cellular Component: intracellular membrane-bounded organelle (GO:0043231);;	--	--	phenolic glucoside malonyltransferase 1 [Oryza sativa Japonica Group]
Os04g0686600	0.696573	0.326835	Biological Process: cellular protein modification process (GO:0006464);; Molecular Function: kinase activity (GO:0016301);; Molecular Function: purine ribonucleoside binding (GO:0032550);;	--	--	serine/threonine-protein kinase ATG1t [Oryza sativa Japonica Group]
Os09g0420600	0.43441	0.380914	--	K06693|1.37427e-150|osa:4347083|26S proteasome non-ATPase regulatory subunit 9	Proteasome (ko03050)	26S proteasome non-ATPase regulatory subunit 9 [Oryza sativa Japonica Group]
Os02g0148300	0.427703	1.02652	Cellular Component: intrinsic component of membrane (GO:0031224);;	--	--	Os02g0148300, partial [Oryza sativa Japonica Group]
Os01g0915600	0.120061	-1.04916	Molecular Function: protein binding (GO:0005515);; Cellular Component: intracellular membrane-bounded organelle (GO:0043231);;	--	--	transcription factor bHLH77 isoform X2 [Oryza sativa Japonica Group]
Os04g0484800	0.832906	0.154627	--	K03349|0|osa:4336204|anaphase-promoting complex subunit 2 isoform X1	Ubiquitin mediated proteolysis (ko04120)	OSJNBa0081L15.13 [Oryza sativa Japonica Group]
Os06g0288100	0.00114464	-1.77773	Molecular Function: protein kinase activity (GO:0004672);; Biological Process: protein phosphorylation (GO:0006468);; Biological Process: defense response (GO:0006952);; Biological Process: cell death (GO:0008219);; Cellular Component: intrinsic component of membrane (GO:0031224);; Molecular Function: purine ribonucleoside binding (GO:0032550);;	--	--	leucine-rich repeat receptor-like serine/threonine/tyrosine-protein kinase SOBIR1 [Oryza sativa Japonica Group]
Os05g0139100	0.465375	1.55627	Molecular Function: protein binding (GO:0005515);; Biological Process: transcription, DNA-templated (GO:0006351);; Cellular Component: intracellular membrane-bounded organelle (GO:0043231);; Biological Process: steroid hormone mediated signaling pathway (GO:0043401);; Biological Process: regulation of developmental growth (GO:0048638);;	--	--	basic helix-loop-helix protein APG [Oryza sativa Japonica Group]
Os02g0152900	0.215591	1.33766	Cellular Component: intrinsic component of membrane (GO:0031224);;	--	--	uncharacterized protein LOC4328331 isoform X1 [Oryza sativa Japonica Group]
Os03g0249200	0.278514	-0.438855	--	K15033|2.10609e-134|osa:4332255|peptidyl-tRNA hydrolase ICT1, mitochondrial	--	peptidyl-tRNA hydrolase ICT1, mitochondrial [Oryza sativa Japonica Group]
Os06g0650900	0.074691	2.41475	--	--	--	Os06g0650900 [Oryza sativa Japonica Group]
Os07g0187400	0.0118562	-1.05062	--	--	--	uncharacterized protein ycf45 [Oryza sativa Japonica Group]
Os09g0423700	0.0792603	-0.912711	Molecular Function: protein binding (GO:0005515);; Cellular Component: intracellular membrane-bounded organelle (GO:0043231);;	--	--	uncharacterized protein LOC4347100 [Oryza sativa Japonica Group]
Os10g0492900	6.78722e-13	5.33396	--	--	--	Os10g0492900 [Oryza sativa Japonica Group]
Os01g0191500	0.32465	0.513166	Molecular Function: catalytic activity (GO:0003824);; Cellular Component: intracellular membrane-bounded organelle (GO:0043231);; Molecular Function: metal ion binding (GO:0046872);;	K01412|0|osa:4327300|mitochondrial-processing peptidase subunit alpha	--	mitochondrial-processing peptidase subunit alpha [Oryza sativa Japonica Group]
Os06g0648500	0.461491	0.495978	--	--	--	uncharacterized protein LOC4341675 [Oryza sativa Japonica Group]
Os10g0463800	0.00129667	4.3111	Cellular Component: intracellular membrane-bounded organelle (GO:0043231);;	--	--	uncharacterized protein LOC4348829 [Oryza sativa Japonica Group]
Os05g0364500	0.644484	0.262735	Cellular Component: intrinsic component of membrane (GO:0031224);;	--	--	Os05g0364500, partial [Oryza sativa Japonica Group]
Os09g0279400	0.290195	-0.987416	Cellular Component: chloroplast thylakoid (GO:0009534);; Cellular Component: intrinsic component of membrane (GO:0031224);;	--	--	rhodanese-like domain-containing protein 9, chloroplastic [Oryza sativa Japonica Group]
Os07g0291750	0.0756441	-1.54374	--	--	--	Os07g0291750, partial [Oryza sativa Japonica Group]
Os03g0237900	0.993698	0.00709157	Biological Process: single-organism cellular process (GO:0044763);;	--	--	Os03g0237900 [Oryza sativa Japonica Group]
Os03g0392300	0.760597	0.199588	Molecular Function: purine ribonucleoside binding (GO:0032550);; Biological Process: intracellular signal transduction (GO:0035556);; Cellular Component: cell part (GO:0044464);;	K07952|1.65657e-141|osa:4333026|ADP-ribosylation factor-related protein 1	--	ADP-ribosylation factor-related protein 1 isoform X2 [Oryza sativa Japonica Group]
Os01g0757200	0.0975756	0.861665	Biological Process: gibberellin metabolic process (GO:0009685);; Molecular Function: oxidoreductase activity (GO:0016491);; Molecular Function: transition metal ion binding (GO:0046914);;	K04125|0|osa:4325145|gibberellin 2-beta-dioxygenase	Diterpenoid biosynthesis (ko00904)	gibberellin 2-beta-dioxygenase 3-like [Oryza sativa Japonica Group]
Os06g0472700	0.746233	0.171117	--	--	--	uncharacterized protein LOC4341022 isoform X2 [Oryza sativa Japonica Group]
Os04g0402700	0.69869	0.301644	Cellular Component: intracellular membrane-bounded organelle (GO:0043231);;	--	--	Os04g0402700 [Oryza sativa Japonica Group]
Os07g0260300	0.523561	-0.451371	Molecular Function: catalytic activity (GO:0003824);; Cellular Component: intracellular membrane-bounded organelle (GO:0043231);; Biological Process: single-organism metabolic process (GO:0044710);; Biological Process: cellular detoxification (GO:1990748);;	--	--	uncharacterized protein LOC4342871 [Oryza sativa Japonica Group]
Os03g0416300	0.0115971	-2.28798	Biological Process: extracellular matrix organization (GO:0030198);; Cellular Component: intrinsic component of membrane (GO:0031224);; Biological Process: growth (GO:0040007);;	--	--	COBRA-like protein 2 [Oryza sativa Japonica Group]
Os09g0541000	0.00924382	-2.60643	--	K09872|1.60794e-180|osa:4347729|probable aquaporin PIP2-7	--	probable aquaporin PIP2-7 [Oryza sativa Japonica Group]
Os10g0560900	0.47183	0.464435	--	K00652|0|osa:4349380|8-amino-7-oxononanoate synthase	Biotin metabolism (ko00780);; Biosynthesis of cofactors (ko01240)	8-amino-7-oxononanoate synthase [Oryza sativa Japonica Group]
xxx_newGene_9181	0.92021	0.133571	--	--	--	hypothetical protein OsI_24479 [Oryza sativa Indica Group]
Os01g0626400	0.151546	2.44028	--	--	--	WRKY transcription factor 71 [Oryza sativa Japonica Group]
Os01g0251100	0.068894	0.974386	Molecular Function: structural molecule activity (GO:0005198);; Biological Process: gene expression (GO:0010467);; Cellular Component: intracellular ribonucleoprotein complex (GO:0030529);; Cellular Component: intracellular membrane-bounded organelle (GO:0043231);;	K02906|0|osa:4327104|50S ribosomal protein L3-2, chloroplastic	Ribosome (ko03010)	hypothetical protein OsI_01192 [Oryza sativa Indica Group]
Os10g0346600	0.41785	0.656915	--	--	--	vacuolar-sorting receptor 3 [Oryza sativa Japonica Group]
Os03g0102366	0.928942	0.109229	--	--	--	Os03g0102366, partial [Oryza sativa Japonica Group]
Os05g0182800	0.306693	0.544718	--	K01886|0|osa:4337996|glutamine--tRNA ligase	Aminoacyl-tRNA biosynthesis (ko00970)	glutamine--tRNA ligase [Oryza sativa Japonica Group]
Os01g0795300	0.0748996	0.982889	--	--	--	hypothetical protein OsI_04059 [Oryza sativa Indica Group]
Os07g0244300	0.85859	0.110072	--	--	--	transmembrane protein 184A [Oryza sativa Japonica Group]
Os07g0565300	0.710569	0.388288	--	--	--	uncharacterized protein LOC4343623 [Oryza sativa Japonica Group]
Os02g0127900	0.294009	0.637802	Cellular Component: intracellular membrane-bounded organelle (GO:0043231);;	--	--	Os02g0127900, partial [Oryza sativa Japonica Group]
Os03g0735100	0.532105	0.285515	Biological Process: RNA splicing, via transesterification reactions with bulged adenosine as nucleophile (GO:0000377);; Cellular Component: spliceosomal complex (GO:0005681);;	K14548|0|osa:4334021|cirhin	Ribosome biogenesis in eukaryotes (ko03008)	WD repeat-containing protein PCN [Oryza sativa Japonica Group]
Os09g0109600	2.46139e-16	7.71772	--	--	--	uncharacterized protein LOC4346387 [Oryza sativa Japonica Group]
Os05g0150400	0.334484	0.555965	Molecular Function: nucleic acid binding (GO:0003676);; Cellular Component: intracellular membrane-bounded organelle (GO:0043231);;	--	--	Os05g0150400, partial [Oryza sativa Japonica Group]
Os02g0700000	0.591474	0.386428	--	--	--	uncharacterized protein At1g51745 [Oryza sativa Japonica Group]
Os03g0743900	0.992768	-0.00798522	Molecular Function: sulfate adenylyltransferase activity (GO:0004779);; Biological Process: sulfur compound metabolic process (GO:0006790);; Cellular Component: intracellular membrane-bounded organelle (GO:0043231);;	K13811|0|osa:4334073|ATP-sulfurylase 3, chloroplastic	Purine metabolism (ko00230);; Monobactam biosynthesis (ko00261);; Selenocompound metabolism (ko00450);; Sulfur metabolism (ko00920)	ATP-sulfurylase 3, chloroplastic [Oryza sativa Japonica Group]
xxx_newGene_6	0.0365461	1.11367	Cellular Component: intrinsic component of membrane (GO:0031224);;	--	--	Os11g0417700, partial [Oryza sativa Japonica Group]
xxx_newGene_9182	0.965006	-0.0549784	--	--	--	Os06g0718800 [Oryza sativa Japonica Group]
Os08g0559400	0.0976661	1.23344	Cellular Component: cytoplasm (GO:0005737);; Molecular Function: cis-trans isomerase activity (GO:0016859);; Biological Process: peptidyl-proline modification (GO:0018208);;	K12733|7.72202e-107|osa:4346316|peptidyl-prolyl cis-trans isomerase CYP18-2	Spliceosome (ko03040)	peptidyl-prolyl cis-trans isomerase CYP18-2 [Oryza sativa Japonica Group]
Os04g0194600	0.0751513	-2.24668	Molecular Function: nucleic acid binding (GO:0003676);; Biological Process: transcription, DNA-templated (GO:0006351);; Cellular Component: intracellular membrane-bounded organelle (GO:0043231);; Biological Process: single-multicellular organism process (GO:0044707);;	--	--	OSJNBb0026E15.1 [Oryza sativa Japonica Group]
Os06g0604300	2.93318e-05	-3.65906	Molecular Function: phospholipase activity (GO:0004620);; Biological Process: glycerophospholipid metabolic process (GO:0006650);; Molecular Function: metal ion binding (GO:0046872);;	K01115|0|osa:4341468|phospholipase D alpha 2-like	Glycerophospholipid metabolism (ko00564);; Ether lipid metabolism (ko00565);; Endocytosis (ko04144)	phospholipase D alpha 2-like [Oryza sativa Japonica Group]
Os07g0607800	0.081888	-0.945072	--	--	--	acidic leucine-rich nuclear phosphoprotein 32-related protein 1 [Oryza sativa Japonica Group]
Os03g0750700	0.0111417	-1.66292	--	--	--	protein STRICTOSIDINE SYNTHASE-LIKE 3 [Oryza sativa Japonica Group]
Os07g0211400	0.086255	-0.799238	Molecular Function: phosphoprotein phosphatase activity (GO:0004721);; Biological Process: cellular protein modification process (GO:0006464);; Biological Process: phosphate-containing compound metabolic process (GO:0006796);; Biological Process: cell communication (GO:0007154);; Biological Process: meristem structural organization (GO:0009933);; Molecular Function: transferase activity, transfer…	--	--	protein phosphatase 2C 70 isoform X2 [Oryza sativa Japonica Group]
Os02g0664000	0.199147	0.743459	Molecular Function: peroxidase activity (GO:0004601);; Biological Process: response to stress (GO:0006950);; Cellular Component: intracellular membrane-bounded organelle (GO:0043231);; Biological Process: single-organism metabolic process (GO:0044710);; Biological Process: root development (GO:0048364);; Biological Process: shoot system development (GO:0048367);; Biological Process: cellular deto…	K00432|1.20139e-141|osa:4330235|probable phospholipid hydroperoxide glutathione peroxidase	Glutathione metabolism (ko00480);; Arachidonic acid metabolism (ko00590)	probable phospholipid hydroperoxide glutathione peroxidase [Oryza sativa Japonica Group]
Os10g0392400	0.651856	1.6556	--	K13464|2.43972e-105|osa:4348533|protein TIFY 11d	Plant hormone signal transduction (ko04075)	protein TIFY 11d [Oryza sativa Japonica Group]
Os01g0209800	0.00168598	-2.41049	--	--	--	cationic amino acid transporter 5 [Oryza sativa Japonica Group]
Os01g0727900	0.354414	0.806925	Cellular Component: intracellular membrane-bounded organelle (GO:0043231);;	--	--	uncharacterized protein LOC4323917 [Oryza sativa Japonica Group]
Os02g0232100	0.520275	0.428218	--	K10639|2.14026e-28|osa:4328810|E3 ubiquitin-protein ligase CCNB1IP1 homolog isoform X1	--	Os02g0232100, partial [Oryza sativa Japonica Group]
Os11g0197400	0.720702	0.212632	Cellular Component: intrinsic component of membrane (GO:0031224);; Molecular Function: metal ion transmembrane transporter activity (GO:0046873);; Biological Process: transmembrane transport (GO:0055085);; Biological Process: divalent metal ion transport (GO:0070838);;	K22733|1.09103e-63|osa:4349995|probable magnesium transporter NIPA4 isoform X1	--	probable magnesium transporter NIPA3 isoform X3 [Oryza sativa Japonica Group]
Os08g0320400	0.234358	0.953398	--	K01609|5.89662e-161|osa:4345257|indole-3-glycerol phosphate synthase, chloroplastic	Phenylalanine, tyrosine and tryptophan biosynthesis (ko00400);; Biosynthesis of amino acids (ko01230)	putative indole-3-glycerol phosphate synthase [Oryza sativa Japonica Group]
Os09g0491788	0.121316	1.18676	Molecular Function: cofactor binding (GO:0048037);;	--	--	cinnamoyl-CoA reductase 1-like [Oryza sativa Japonica Group]
Os02g0130900	0.740383	0.187115	--	--	--	uncharacterized protein LOC4328192 [Oryza sativa Japonica Group]
Os03g0821900	0.994095	-0.00668937	Molecular Function: protein kinase activity (GO:0004672);; Biological Process: cellular protein modification process (GO:0006464);; Biological Process: phosphate-containing compound metabolic process (GO:0006796);; Molecular Function: purine ribonucleoside binding (GO:0032550);; Cellular Component: intracellular membrane-bounded organelle (GO:0043231);;	--	--	receptor-like cytoplasmic kinase 176 isoform X2 [Oryza sativa Japonica Group]
Os01g0847000	0.197297	1.08641	Biological Process: transcription, DNA-templated (GO:0006351);; Biological Process: ethylene-activated signaling pathway (GO:0009873);; Cellular Component: DNA-directed RNA polymerase II, holoenzyme (GO:0016591);; Molecular Function: protein dimerization activity (GO:0046983);;	K03126|0|osa:4327470|transcription initiation factor TFIID subunit 12b isoform X1	Basal transcription factors (ko03022)	transcription initiation factor TFIID subunit 12b isoform X1 [Oryza sativa Japonica Group]
Os09g0401600	0.692799	0.321966	Molecular Function: nucleic acid binding (GO:0003676);; Biological Process: DNA metabolic process (GO:0006259);; Biological Process: response to fungus (GO:0009620);; Cellular Component: intracellular membrane-bounded organelle (GO:0043231);;	--	--	Os09g0401600 [Oryza sativa Japonica Group]
Os07g0187200	0.00315209	1.27718	Molecular Function: nucleotide binding (GO:0000166);; Molecular Function: oxidoreductase activity, acting on CH-OH group of donors (GO:0016614);; Biological Process: cellular metabolic compound salvage (GO:0043094);; Cellular Component: intracellular membrane-bounded organelle (GO:0043231);; Biological Process: single-organism metabolic process (GO:0044710);;	K18204|7.63194e-64|osa:4342598|probable D-2-hydroxyglutarate dehydrogenase, mitochondrial	--	probable D-2-hydroxyglutarate dehydrogenase, mitochondrial [Oryza sativa Japonica Group]
Os07g0614500	0.170491	0.798308	Biological Process: translation (GO:0006412);; Molecular Function: translation factor activity, RNA binding (GO:0008135);; Cellular Component: intrinsic component of membrane (GO:0031224);; Cellular Component: protein complex (GO:0043234);;	K03232|9.67587e-116|osa:4343894|elongation factor 1-delta 1	--	elongation factor 1-delta 1 [Oryza sativa Japonica Group]
Os08g0398700	0.227677	0.766413	--	K08776|0|osa:4345501|aminopeptidase M1-B	--	aminopeptidase M1-B [Oryza sativa Japonica Group]
Os11g0481200	0.0672946	1.10876	--	--	--	Plant protein family protein, expressed [Oryza sativa Japonica Group]
Os04g0513100	0.508964	0.462015	--	K05350|0|osa:4336388|probable inactive beta-glucosidase 14 isoform X1	Cyanoamino acid metabolism (ko00460);; Starch and sucrose metabolism (ko00500);; Phenylpropanoid biosynthesis (ko00940)	probable inactive beta-glucosidase 14 [Oryza sativa Japonica Group]
Os01g0823600	0.0769813	-1.50756	Molecular Function: nucleic acid binding (GO:0003676);; Biological Process: transcription, DNA-templated (GO:0006351);; Cellular Component: intracellular membrane-bounded organelle (GO:0043231);; Molecular Function: transition metal ion binding (GO:0046914);;	--	--	uncharacterized protein LOC4327573 [Oryza sativa Japonica Group]
Os11g0433900	0.00194027	1.3478	--	K02923|1.54992e-41|osa:4343529|60S ribosomal protein L38	Ribosome (ko03010)	60S ribosomal protein L38 [Oryza sativa Japonica Group]
Os01g0229200	0.671541	0.275159	Biological Process: protein transport (GO:0015031);; Cellular Component: cell part (GO:0044464);;	--	--	TOM1-like protein 9 [Oryza sativa Japonica Group]
Os03g0857100	0.407855	0.811984	--	--	--	Os12g0219700, partial [Oryza sativa Japonica Group]
Os04g0394300	0.554499	0.280086	Molecular Function: nucleic acid binding (GO:0003676);; Molecular Function: small molecule binding (GO:0036094);; Molecular Function: cation binding (GO:0043169);;	K13192|0|osa:4335690|zinc finger CCCH domain-containing protein 27	--	Os04g0394300, partial [Oryza sativa Japonica Group]
Os03g0115300	0.970303	0.0396586	--	--	--	Os03g0115300 [Oryza sativa Japonica Group]
Os05g0274950	0.24734	-1.11732	Cellular Component: plastid (GO:0009536);; Biological Process: cellular process (GO:0009987);; Cellular Component: membrane (GO:0016020);; Molecular Function: transferase activity, transferring alkyl or aryl (other than methyl) groups (GO:0016765);; Biological Process: single-organism process (GO:0044699);;	--	--	Os05g0274950 [Oryza sativa Japonica Group]
Os08g0112400	0.0408366	2.19137	--	--	--	putative pentatricopeptide (PPR) repeat-containing protein [Oryza sativa Japonica Group]
Os01g0369900	0.851025	0.298794	Biological Process: fatty acid biosynthetic process (GO:0006633);; Molecular Function: oxidoreductase activity (GO:0016491);; Molecular Function: ribonucleotide binding (GO:0032553);;	K05894|0|osa:4325705|LOW QUALITY PROTEIN: putative 12-oxophytodienoate reductase 10	alpha-Linolenic acid metabolism (ko00592)	RecName: Full=Putative 12-oxophytodienoate reductase 10; AltName: Full=OPDA-reductase 10; Short=OsOPR10
Os06g0663200	0.549061	0.646349	Molecular Function: protein kinase activity (GO:0004672);; Biological Process: cellular protein modification process (GO:0006464);; Biological Process: phosphate-containing compound metabolic process (GO:0006796);; Molecular Function: purine ribonucleoside binding (GO:0032550);;	--	--	hypothetical protein OsI_24012 [Oryza sativa Indica Group]
Os03g0760200	0.320172	1.13215	--	--	--	putative cytochrome P450 [Oryza sativa Japonica Group]
Os01g0100700	0.0718834	1.53864	--	K02989|1.18071e-144|osa:4326457|40S ribosomal protein S5	Ribosome (ko03010)	40S ribosomal protein S5 [Oryza sativa Japonica Group]
Os08g0127500	0.152745	-0.680926	Molecular Function: antioxidant activity (GO:0016209);; Cellular Component: intrinsic component of membrane (GO:0031224);; Biological Process: cellular detoxification (GO:1990748);;	K09775|1.48089e-113|osa:4344570|uncharacterized membrane protein YuiD	--	uncharacterized protein LOC4344570 [Oryza sativa Japonica Group]
Os03g0773150	0.0290608	1.78849	Molecular Function: nucleic acid binding (GO:0003676);; Molecular Function: structural molecule activity (GO:0005198);; Biological Process: gene expression (GO:0010467);; Cellular Component: small ribosomal subunit (GO:0015935);; Cellular Component: intrinsic component of membrane (GO:0031224);; Cellular Component: intracellular membrane-bounded organelle (GO:0043231);;	K02980|1.34348e-32|jre:108996289|40S ribosomal protein S29-like	Ribosome (ko03010)	hypothetical protein SETIT_9G073900v2 [Setaria italica]
Os02g0829400	0.0241993	-0.874589	--	K19022|0|osa:4331238|uncharacterized protein LOC4331238	--	uncharacterized protein LOC4331238 [Oryza sativa Japonica Group]
Os03g0669300	0.358386	1.07437	--	--	--	glucan endo-1,3-beta-glucosidase 7 [Oryza sativa Japonica Group]
Os03g0843100	0.224889	-0.789905	--	K07904|1.43162e-137|osa:4334746|ras-related protein RABA2a	Endocytosis (ko04144)	ras-related protein RABA2a [Oryza sativa Japonica Group]
Os02g0803700	0.612612	0.354822	--	K03065|0|osa:4331050|26S protease regulatory subunit 6A homolog	Proteasome (ko03050)	hypothetical protein OsI_09330 [Oryza sativa Indica Group]
Os01g0218800	0.98074	-0.0127904	Biological Process: transport (GO:0006810);; Biological Process: metabolic process (GO:0008152);; Molecular Function: P-P-bond-hydrolysis-driven transmembrane transporter activity (GO:0015405);; Molecular Function: transferase activity, transferring one-carbon groups (GO:0016741);; Molecular Function: nucleoside-triphosphatase activity (GO:0017111);; Cellular Component: intrinsic component of mem…	--	--	histone-lysine N-methyltransferase ATX5 [Oryza sativa Japonica Group]
Os04g0613900	0.0319737	0.92807	Cellular Component: intrinsic component of membrane (GO:0031224);; Molecular Function: metal ion transmembrane transporter activity (GO:0046873);; Biological Process: cellular potassium ion transport (GO:0071804);;	K03549|0|osa:4336979|probable potassium transporter 11	--	probable potassium transporter 11 isoform X1 [Oryza sativa Japonica Group]
Os03g0284500	0.0145412	-1.34315	--	--	--	uncharacterized protein YKR070W isoform X1 [Oryza sativa Japonica Group]
Os05g0106600	0.335337	0.558231	Molecular Function: structural molecule activity (GO:0005198);; Cellular Component: actin cytoskeleton (GO:0015629);; Molecular Function: nucleoside-triphosphatase activity (GO:0017111);; Molecular Function: purine ribonucleoside binding (GO:0032550);;	K10355|0|osa:4337566|actin-97	--	hypothetical protein OsJ_16821 [Oryza sativa Japonica Group]
Os06g0707100	0.662525	-0.328299	--	K03327|0|osa:4342011|protein DETOXIFICATION 16	--	protein DETOXIFICATION 16 isoform X1 [Oryza sativa Japonica Group]
Os03g0328900	0.0452712	-0.989564	--	--	--	zinc finger CCCH domain-containing protein 22 isoform X1 [Oryza sativa Japonica Group]
Os09g0478500	0.781668	0.151772	--	K08286|0|osa:4347373|serine/threonine-protein kinase D6PK	--	serine/threonine-protein kinase D6PK [Oryza sativa Japonica Group]
Os02g0197125	0.3419	-0.51401	--	K08472|5.15776e-133|bdi:100825311|MLO-like protein 13	--	MLO-like protein 13 [Brachypodium distachyon]
Os06g0174350	0.650355	0.69817	--	--	--	unknown protein [Oryza sativa Japonica Group]
Os02g0788400	0.138076	0.813738	Biological Process: translational initiation (GO:0006413);; Molecular Function: translation factor activity, RNA binding (GO:0008135);; Molecular Function: small molecule binding (GO:0036094);; Cellular Component: protein complex (GO:0043234);; Cellular Component: translation preinitiation complex (GO:0070993);;	K03248|0|osa:4330963|eukaryotic translation initiation factor 3 subunit G	RNA transport (ko03013)	eukaryotic translation initiation factor 3 subunit G [Oryza sativa Japonica Group]
Os03g0425300	0.404384	0.55983	Biological Process: phosphate-containing compound metabolic process (GO:0006796);; Biological Process: G-protein coupled receptor signaling pathway (GO:0007186);; Molecular Function: kinase activity (GO:0016301);; Cellular Component: intrinsic component of membrane (GO:0031224);; Molecular Function: purine ribonucleoside binding (GO:0032550);; Molecular Function: cation binding (GO:0043169);; Cel…	--	--	putative diacylglycerol kinase (with alternative splicing) [Oryza sativa Japonica Group]
Os01g0200400	0.305093	0.677509	Cellular Component: intrinsic component of membrane (GO:0031224);;	--	--	thioredoxin-related transmembrane protein 2 [Oryza sativa Japonica Group]
xxx_newGene_11592	0.000238836	3.95175	--	--	--	hypothetical protein MTR_0021s0160 [Medicago truncatula]
Os08g0174100	6.15232e-10	-2.19345	--	--	--	unnamed protein product [Triticum turgidum subsp. durum]
Os03g0153000	0.13415	0.550368	--	--	--	Os03g0153000, partial [Oryza sativa Japonica Group]
Os06g0470000	0.668363	0.448821	Molecular Function: transferase activity (GO:0016740);; Cellular Component: intrinsic component of membrane (GO:0031224);;	--	--	uncharacterized protein LOC9267972 [Oryza sativa Japonica Group]
Os10g0563500	0.110752	1.09332	--	--	--	Os10g0563500, partial [Oryza sativa Japonica Group]
Os02g0685600	0.588793	0.651051	Molecular Function: phosphoprotein phosphatase activity (GO:0004721);; Biological Process: cellular protein modification process (GO:0006464);; Molecular Function: cation binding (GO:0043169);; Cellular Component: intracellular membrane-bounded organelle (GO:0043231);;	K01102|0|osa:4330350|probable protein phosphatase 2C 25	--	probable protein phosphatase 2C 25 isoform X1 [Oryza sativa Japonica Group]
Os02g0562700	0.281319	-0.607961	Molecular Function: nucleotide binding (GO:0000166);; Molecular Function: oxidoreductase activity, acting on the CH-OH group of donors, NAD or NADP as acceptor (GO:0016616);; Biological Process: single-organism metabolic process (GO:0044710);;	K18121|0|osa:4329690|glyoxylate/succinic semialdehyde reductase 1	Glyoxylate and dicarboxylate metabolism (ko00630);; Butanoate metabolism (ko00650);; Carbon metabolism (ko01200)	glyoxylate/succinic semialdehyde reductase 1 [Oryza sativa Japonica Group]
Os06g0712500	0.262315	-1.06025	--	--	--	putative 68 kDa protein [Oryza sativa Japonica Group]
xxx_newGene_5237	0.110279	-0.758474	Molecular Function: binding (GO:0005488);; Cellular Component: photosystem (GO:0009521);; Biological Process: photosynthetic electron transport chain (GO:0009767);;	K02705|0|mtr:MTR_0002s0420|photosystem II CP43 chlorophyll apoprotein	Photosynthesis (ko00195)	LOW QUALITY PROTEIN: uncharacterized protein LOC25479338 [Medicago truncatula]
Os06g0128100	0.00376416	1.45708	--	--	--	probable methyltransferase PMT15 [Oryza sativa Japonica Group]
Os12g0127500	0.551199	-0.789642	--	--	--	uncharacterized protein LOC4351392 [Oryza sativa Japonica Group]
Os04g0583101	0.30054	-0.621206	Biological Process: plastid organization (GO:0009657);;	--	--	pentatricopeptide repeat-containing protein At5g13770, chloroplastic [Oryza sativa Japonica Group]
Os05g0152201	0.544844	0.296818	--	--	--	Os05g0152201 [Oryza sativa Japonica Group]
Os02g0247800	0.0130209	3.13168	--	--	--	sodium/calcium exchanger NCL2-like [Oryza sativa Japonica Group]
Os01g0669100	0.14806	-1.1073	--	--	--	putative receptor protein kinase ZmPK1 [Oryza sativa Japonica Group]
Os11g0258400	0.518175	0.537557	Molecular Function: purine ribonucleoside binding (GO:0032550);;	--	--	disease resistance protein RGA5-like isoform X1 [Oryza sativa Japonica Group]
Os03g0839000	0.1574	-0.815753	Cellular Component: intrinsic component of membrane (GO:0031224);; Molecular Function: transition metal ion binding (GO:0046914);;	K15707|1.23899e-107|osa:4334720|E3 ubiquitin-protein ligase RNF170	--	E3 ubiquitin-protein ligase RNF170 [Oryza sativa Japonica Group]
Os03g0851000	0.0291125	1.39229	Biological Process: transcription, DNA-templated (GO:0006351);; Cellular Component: intrinsic component of membrane (GO:0031224);;	--	--	basic transcription factor 3 [Oryza sativa Japonica Group]
Os05g0589600	0.404059	0.596712	--	K13199|1.10631e-59|osa:4339782|pro-resilin	--	RGG repeats nuclear RNA binding protein A [Oryza sativa Japonica Group]
Os08g0487900	0.102978	-1.31834	--	K01076|0|osa:4345894|alpha/beta hydrolase domain-containing protein 17B isoform X1	--	alpha/beta hydrolase domain-containing protein 17B [Oryza sativa Japonica Group]
Os09g0441650	0.0369886	-1.58862	--	--	--	cytochrome P450 71A1 [Oryza sativa Japonica Group]
Os01g0908700	0.331296	1.48574	Molecular Function: transition metal ion binding (GO:0046914);;	--	--	hypothetical protein OsJ_04480 [Oryza sativa Japonica Group]
Os05g0434800	5.24467e-10	-3.43339	Cellular Component: intrinsic component of membrane (GO:0031224);;	--	--	Os05g0434800 [Oryza sativa Japonica Group]
Os03g0185200	0.435443	0.433758	--	--	--	pentatricopeptide repeat-containing protein DOT4, chloroplastic isoform X1 [Oryza sativa Japonica Group]
Os09g0474300	0.000239318	1.68203	Molecular Function: protein binding (GO:0005515);; Biological Process: cellular process (GO:0009987);; Molecular Function: purine ribonucleoside binding (GO:0032550);; Cellular Component: intracellular membrane-bounded organelle (GO:0043231);; Biological Process: response to stimulus (GO:0050896);;	--	--	Os09g0474300 [Oryza sativa Japonica Group]
Os06g0143000	0.22457	0.504915	Molecular Function: catalytic activity (GO:0003824);; Biological Process: superoxide metabolic process (GO:0006801);; Cellular Component: nucleoid (GO:0009295);; Cellular Component: chloroplast (GO:0009507);; Molecular Function: antioxidant activity (GO:0016209);; Molecular Function: cation binding (GO:0043169);; Biological Process: single-organism metabolic process (GO:0044710);;	K04564|0|osa:4340091|superoxide dismutase [Fe] 2, chloroplastic	Peroxisome (ko04146)	superoxide dismutase [Fe] 2, chloroplastic [Oryza sativa Japonica Group]
Os05g0317200	0.570197	0.580907	Biological Process: fatty acid metabolic process (GO:0006631);; Cellular Component: plastid envelope (GO:0009526);; Molecular Function: fatty acid ligase activity (GO:0015645);; Cellular Component: intrinsic component of membrane (GO:0031224);;	K01897|0|osa:4338395|long chain acyl-CoA synthetase 8	Fatty acid biosynthesis (ko00061);; Fatty acid degradation (ko00071);; Fatty acid metabolism (ko01212);; Peroxisome (ko04146)	long chain acyl-CoA synthetase 8 [Oryza sativa Japonica Group]
Os04g0560700	0.0809845	-0.808793	--	--	--	Os04g0560700, partial [Oryza sativa Japonica Group]
Os12g0271700	0.0259555	-1.24419	Biological Process: isoprenoid metabolic process (GO:0006720);; Cellular Component: plastid (GO:0009536);; Molecular Function: transferase activity, transferring alkyl or aryl (other than methyl) groups (GO:0016765);; Molecular Function: cation binding (GO:0043169);;	K05356|0|osa:4351957|probable solanesyl-diphosphate synthase 3, chloroplastic	Terpenoid backbone biosynthesis (ko00900)	Os12g0271700, partial [Oryza sativa Japonica Group]
Os10g0525400	0.211197	-1.49658	--	K00799|1.15691e-165|osa:4349167|glutathione S-transferase U17	Glutathione metabolism (ko00480)	glutathione S-transferase U17 [Oryza sativa Japonica Group]
Os03g0122300	0.43657	2.68006	--	K24028|0|osa:4331443|naringenin,2-oxoglutarate 3-dioxygenase	--	flavanone 3-dioxygenase 2-like [Oryza sativa Japonica Group]
Os03g0805100	0.00633108	2.42261	Molecular Function: farnesyltranstransferase activity (GO:0004311);; Biological Process: lipid metabolic process (GO:0006629);; Cellular Component: intrinsic component of membrane (GO:0031224);;	K00801|0|osa:4334492|squalene synthase	Steroid biosynthesis (ko00100);; Sesquiterpenoid and triterpenoid biosynthesis (ko00909)	squalene synthase [Oryza sativa Japonica Group]
Os03g0646900	0.583646	0.455404	Biological Process: cellular protein modification process (GO:0006464);; Molecular Function: phosphatase activity (GO:0016791);; Molecular Function: cation binding (GO:0043169);; Cellular Component: intracellular membrane-bounded organelle (GO:0043231);; Biological Process: steroid hormone mediated signaling pathway (GO:0043401);;	--	--	hypothetical protein OsJ_11899 [Oryza sativa Japonica Group]
Os02g0803200	0.501022	0.514938	--	--	--	hypothetical protein OsI_09325 [Oryza sativa Indica Group]
Os03g0859900	1.40017e-10	4.14629	Cellular Component: plastid (GO:0009536);;	--	--	Os03g0859900, partial [Oryza sativa Japonica Group]
Os01g0839500	0.098397	0.727212	--	K11252|1.04996e-58|osa:4327384|histone H2B.11	--	histone H2B.11 [Panicum hallii]
Os06g0498900	0.221077	0.771579	--	--	--	GTP-binding protein BRASSINAZOLE INSENSITIVE PALE GREEN 2, chloroplastic [Oryza sativa Japonica Group]
Os02g0171100	0.604864	0.460065	Molecular Function: nucleotide binding (GO:0000166);; Molecular Function: oxidoreductase activity, acting on the aldehyde or oxo group of donors (GO:0016903);; Biological Process: hexose metabolic process (GO:0019318);; Cellular Component: intracellular membrane-bounded organelle (GO:0043231);;	K00134|0|osa:4328446|glyceraldehyde-3-phosphate dehydrogenase GAPCP1, chloroplastic	Glycolysis / Gluconeogenesis (ko00010);; Carbon fixation in photosynthetic organisms (ko00710);; Carbon metabolism (ko01200);; Biosynthesis of amino acids (ko01230)	glyceraldehyde-3-phosphate dehydrogenase GAPCP1, chloroplastic [Oryza sativa Japonica Group]
Os10g0127700	0.989792	-0.0103209	Cellular Component: intrinsic component of membrane (GO:0031224);;	--	--	uncharacterized protein LOC4348023 isoform X1 [Oryza sativa Japonica Group]
Os08g0478500	0.998971	0.00207988	Molecular Function: ubiquitin-like protein-specific protease activity (GO:0019783);; Biological Process: modification-dependent protein catabolic process (GO:0019941);; Cellular Component: intrinsic component of membrane (GO:0031224);; Molecular Function: cation binding (GO:0043169);; Biological Process: protein modification by small protein removal (GO:0070646);;	K11855|0|osa:4345840|ubiquitin carboxyl-terminal hydrolase 17	--	ubiquitin carboxyl-terminal hydrolase 17 [Oryza sativa Japonica Group]
Os04g0481400	0.339617	0.62204	--	--	--	protein-L-isoaspartate O-methyltransferase-like [Panicum hallii]
Os10g0572500	0.614667	-0.279804	--	--	--	uncharacterized protein LOC4349466 isoform X1 [Oryza sativa Japonica Group]
Os07g0506600	0.352008	-0.913003	--	--	--	filament-like plant protein 3 [Oryza sativa Japonica Group]
Os06g0126000	0.989764	0.0157563	Cellular Component: intracellular membrane-bounded organelle (GO:0043231);;	--	--	Os06g0126000, partial [Oryza sativa Japonica Group]
Os10g0521000	0.0397909	3.52353	Biological Process: trehalose metabolic process (GO:0005991);; Molecular Function: trehalase activity (GO:0015927);; Cellular Component: membrane (GO:0016020);;	K01194|0|osa:4349141|probable trehalase	Starch and sucrose metabolism (ko00500)	probable trehalase [Oryza sativa Japonica Group]
Os10g0563700	0.192981	0.937575	--	K00940|4.16881e-105|osa:4349403|nucleoside diphosphate kinase 1	Purine metabolism (ko00230);; Pyrimidine metabolism (ko00240);; Biosynthesis of cofactors (ko01240);; MAPK signaling pathway - plant (ko04016)	nucleoside diphosphate kinase 1 [Oryza sativa Japonica Group]
Os12g0130900	0.352386	0.731147	Cellular Component: membrane (GO:0016020);; Cellular Component: intracellular membrane-bounded organelle (GO:0043231);; Molecular Function: transition metal ion binding (GO:0046914);;	--	--	Os12g0130900, partial [Oryza sativa Japonica Group]
Os03g0128800	0.125155	-1.13777	Cellular Component: plastid (GO:0009536);;	--	--	Os03g0128800 [Oryza sativa Japonica Group]
Os06g0164000	0.622853	0.361498	--	K04706|0|osa:4340227|E4 SUMO-protein ligase PIAL1	Ubiquitin mediated proteolysis (ko04120)	E4 SUMO-protein ligase PIAL1 [Oryza sativa Japonica Group]
Os03g0823100	0.0598631	-0.761637	--	--	--	putative sugar transporter protein [Oryza sativa Japonica Group]
Os10g0545300	0.591474	0.408296	--	K09250|7.15777e-174|osa:4349279|zinc finger protein GIS2	--	zinc finger protein GIS2 [Oryza sativa Japonica Group]
Os01g0627500	0.58824	0.586152	--	--	--	cytochrome P450 72A15 [Oryza sativa Japonica Group]
Os09g0526600	0.00958021	2.22441	Molecular Function: nucleic acid binding transcription factor activity (GO:0001071);; Molecular Function: DNA binding (GO:0003677);; Biological Process: transcription, DNA-templated (GO:0006351);; Cellular Component: membrane (GO:0016020);; Cellular Component: intracellular membrane-bounded organelle (GO:0043231);;	K09419|2.07337e-180|osa:4347637|heat stress transcription factor B-2c isoform X1	--	heat stress transcription factor B-2c isoform X3 [Oryza sativa Japonica Group]
Os02g0618200	0.113324	-1.00413	Biological Process: transcription, DNA-templated (GO:0006351);; Biological Process: intracellular signal transduction (GO:0035556);; Cellular Component: intracellular membrane-bounded organelle (GO:0043231);;	K12127|0|osa:4330000|two-component response regulator-like PRR1	Circadian rhythm - plant (ko04712)	pseudo-response regulator 1 [Oryza sativa Japonica Group]
Os07g0683200	0.0043391	2.11493	Molecular Function: nucleic acid binding (GO:0003676);; Biological Process: transcription, DNA-templated (GO:0006351);; Cellular Component: intracellular membrane-bounded organelle (GO:0043231);;	--	--	NAC transcription factor 29 [Oryza sativa Japonica Group]
Os08g0504500	0.789136	0.239682	--	--	--	hypothetical protein OsI_29797 [Oryza sativa Indica Group]
Os08g0156800	0.00310597	1.29447	--	K02915|2.28387e-63|osa:4344696|60S ribosomal protein L34	Ribosome (ko03010)	PREDICTED: 60S ribosomal protein L34-like [Oryza brachyantha]
Os01g0708500	0.18522	0.912719	--	K22522|1.87159e-87|osa:4327684|probable cytokinin riboside 5'-monophosphate phosphoribohydrolase LOGL1	--	probable cytokinin riboside 5&apos;-monophosphate phosphoribohydrolase LOGL1 [Oryza sativa Japonica Group]
Os06g0608700	0.0898815	-1.42553	--	K01623|0|osa:4341496|fructose-bisphosphate aldolase, cytoplasmic isozyme 1	Glycolysis / Gluconeogenesis (ko00010);; Pentose phosphate pathway (ko00030);; Fructose and mannose metabolism (ko00051);; Carbon fixation in photosynthetic organisms (ko00710);; Carbon metabolism (ko01200);; Biosynthesis of amino acids (ko01230)	fructose-bisphosphate aldolase 5, cytosolic [Oryza sativa Japonica Group]
Os04g0469500	0.215555	1.65715	Biological Process: glycolytic process (GO:0006096);; Molecular Function: phosphofructokinase activity (GO:0008443);; Molecular Function: purine ribonucleoside binding (GO:0032550);; Molecular Function: cation binding (GO:0043169);; Cellular Component: intracellular membrane-bounded organelle (GO:0043231);;	--	--	Os04g0469500, partial [Oryza sativa Japonica Group]
Os02g0191700	0.13281	1.45576	Molecular Function: metal ion binding (GO:0046872);;	K11583|0|osa:4328580|serine/threonine protein phosphatase 2A regulatory subunit B''beta	mRNA surveillance pathway (ko03015)	serine/threonine protein phosphatase 2A regulatory subunit B&apos;&apos;beta [Oryza sativa Japonica Group]
Os08g0554900	0.567768	0.29907	Cellular Component: intrinsic component of membrane (GO:0031224);;	K17086|0|osa:4346277|transmembrane 9 superfamily member 8	--	transmembrane 9 superfamily member 8 [Oryza sativa Japonica Group]
Os07g0495100	0.1896	-0.43594	Biological Process: regulation of protein phosphorylation (GO:0001932);; Molecular Function: transferase activity, transferring phosphorus-containing groups (GO:0016772);; Molecular Function: kinase regulator activity (GO:0019207);; Cellular Component: protein complex (GO:0043234);;	K03115|2.53433e-155|osa:4343287|putative casein kinase II subunit beta-4 isoform X1	Ribosome biogenesis in eukaryotes (ko03008);; Circadian rhythm - plant (ko04712)	hypothetical protein OsJ_24322 [Oryza sativa Japonica Group]
Os02g0623500	0.626181	0.246776	Biological Process: developmental process involved in reproduction (GO:0003006);; Molecular Function: aminoacyl-tRNA ligase activity (GO:0004812);; Biological Process: tRNA aminoacylation for protein translation (GO:0006418);; Cellular Component: plastid (GO:0009536);; Molecular Function: purine ribonucleoside binding (GO:0032550);;	K04567|0|osa:4330025|lysine--tRNA ligase, chloroplastic/mitochondrial	Aminoacyl-tRNA biosynthesis (ko00970)	lysine--tRNA ligase, chloroplastic/mitochondrial [Oryza sativa Japonica Group]
Os05g0163400	0.329543	0.884361	Molecular Function: transition metal ion binding (GO:0046914);;	--	--	probable E3 ubiquitin-protein ligase RHG1A isoform X2 [Oryza sativa Japonica Group]
Os06g0649000	0.354091	-2.13405	--	--	--	Os06g0649000, partial [Oryza sativa Japonica Group]
Os03g0254700	0.904454	0.0818283	Biological Process: transcription, DNA-templated (GO:0006351);;	--	--	protein TPR3 isoform X1 [Oryza sativa Japonica Group]
Os01g0695200	0.455661	1.00772	Molecular Function: UDP-glycosyltransferase activity (GO:0008194);; Cellular Component: intrinsic component of membrane (GO:0031224);;	--	--	unknown protein [Oryza sativa Japonica Group]
Os01g0646300	0.129983	1.33873	--	K14494|0|osa:4325922|DELLA protein SLN1	Plant hormone signal transduction (ko04075)	DELLA protein SLN1 [Oryza sativa Japonica Group]
Os01g0867300	3.60754e-13	4.66223	Molecular Function: nucleic acid binding transcription factor activity (GO:0001071);; Molecular Function: DNA binding (GO:0003677);; Biological Process: transcription, DNA-templated (GO:0006351);; Cellular Component: intracellular membrane-bounded organelle (GO:0043231);;	K14432|1.61514e-138|osa:4325078|G-box-binding factor 4	Plant hormone signal transduction (ko04075)	bZIP transcription factor 12-like [Oryza sativa Japonica Group]
Os02g0697600	0.274634	0.711212	--	K17681|0|osa:4330409|ATPase family AAA domain-containing protein 3-B	--	ATPase family AAA domain-containing protein 3-B [Oryza sativa Japonica Group]
Os03g0708750	0.449833	0.957391	--	--	--	Os03g0708800 [Oryza sativa Japonica Group]
Os10g0510500	0.240989	-0.671393	Biological Process: response to hormone (GO:0009725);;	K14488|5.27206e-51|osa:4349090|auxin-responsive protein SAUR32	Plant hormone signal transduction (ko04075)	hypothetical protein OsI_34284 [Oryza sativa Indica Group]
Os01g0763750	0.0819399	-1.2531	--	K07195|0|osa:4326884|exocyst complex component EXO70B1	--	exocyst complex component EXO70E2 [Oryza sativa Japonica Group]
Os06g0603600	0.684448	0.330697	--	--	--	SPX domain-containing protein 1 [Oryza sativa Japonica Group]
Os01g0511200	0.0201671	0.835167	--	--	--	uncharacterized protein LOC4324030 [Oryza sativa Japonica Group]
Os02g0817900	0.257972	-0.963191	Molecular Function: monooxygenase activity (GO:0004497);; Cellular Component: plastid envelope (GO:0009526);; Biological Process: carotenoid biosynthetic process (GO:0016117);; Molecular Function: tetrapyrrole binding (GO:0046906);; Molecular Function: transition metal ion binding (GO:0046914);;	K15747|0|osa:4331152|protein LUTEIN DEFICIENT 5, chloroplastic	Carotenoid biosynthesis (ko00906)	protein LUTEIN DEFICIENT 5, chloroplastic isoform X1 [Oryza sativa Japonica Group]
Os04g0209200	0.00426539	3.90846	--	--	--	ABC transporter C family member 14 isoform X2 [Oryza sativa Japonica Group]
Os05g0305900	0.699537	0.526939	Molecular Function: protein kinase activity (GO:0004672);; Biological Process: cellular protein modification process (GO:0006464);; Biological Process: phosphate-containing compound metabolic process (GO:0006796);; Cellular Component: intrinsic component of membrane (GO:0031224);; Molecular Function: purine ribonucleoside binding (GO:0032550);;	--	--	probable leucine-rich repeat receptor-like protein kinase At5g49770 [Oryza sativa Japonica Group]
Os04g0102700	0.421217	0.63145	Biological Process: response to bacterium (GO:0009617);; Cellular Component: membrane (GO:0016020);; Molecular Function: hydrolase activity, acting on carbon-nitrogen (but not peptide) bonds, in linear amides (GO:0016811);; Molecular Function: ligase activity, forming carbon-nitrogen bonds (GO:0016879);; Biological Process: primary alcohol metabolic process (GO:0034308);; Cellular Component: vacu…	--	--	fatty acid amide hydrolase isoform X1 [Oryza sativa Japonica Group]
Os06g0712400	0.93121	0.0613349	--	K01309|0|osa:4342044|protein FAM63A	--	ubiquitin carboxyl-terminal hydrolase MINDY-1 [Oryza sativa Japonica Group]
Os04g0602700	0.356251	0.698919	Biological Process: tRNA wobble base modification (GO:0002097);; Molecular Function: catalytic activity (GO:0003824);; Molecular Function: small molecule binding (GO:0036094);; Biological Process: single-organism metabolic process (GO:0044710);; Molecular Function: organic cyclic compound binding (GO:0097159);;	K18670|0|osa:4336893|serine/threonine-protein kinase minibrain	--	alkylated DNA repair protein ALKBH8 homolog [Oryza sativa Japonica Group]
Os08g0450800	0.248116	1.25706	Molecular Function: kinase activity (GO:0016301);; Molecular Function: purine ribonucleoside binding (GO:0032550);; Molecular Function: cation binding (GO:0043169);; Biological Process: phosphatidylinositol metabolic process (GO:0046488);;	--	--	Os08g0450800, partial [Oryza sativa Japonica Group]
Os07g0223100	0.463508	0.626501	Biological Process: protein transport (GO:0015031);; Cellular Component: cytoplasmic vesicle (GO:0031410);; Molecular Function: purine ribonucleoside binding (GO:0032550);; Biological Process: intracellular signal transduction (GO:0035556);; Cellular Component: intracellular membrane-bounded organelle (GO:0043231);; Molecular Function: lipase activator activity (GO:0060229);;	K07937|1.45249e-129|zma:100280918|ADP-ribosylation factor 1	Endocytosis (ko04144)	hypothetical protein OsJ_23578 [Oryza sativa Japonica Group]
Os05g0209100	0.649077	0.210769	--	K23741|0|osa:4338088|mannosyl-oligosaccharide 1,2-alpha-mannosidase MNS3	N-Glycan biosynthesis (ko00510);; Various types of N-glycan biosynthesis (ko00513);; Protein processing in endoplasmic reticulum (ko04141)	mannosyl-oligosaccharide 1,2-alpha-mannosidase MNS3 [Oryza sativa Japonica Group]
Os03g0103200	0.0427912	-2.27718	Molecular Function: hydrolase activity (GO:0016787);; Biological Process: protein metabolic process (GO:0019538);;	--	--	cortical cell-delineating protein [Oryza sativa Japonica Group]
Os11g0110100	4.4508e-05	1.6364	Cellular Component: intracellular membrane-bounded organelle (GO:0043231);;	--	--	Os11g0110100, partial [Oryza sativa Japonica Group]
Os03g0782900	0.996865	-0.00350198	Cellular Component: plastid (GO:0009536);;	--	--	hypothetical protein OsI_13766 [Oryza sativa Indica Group]
Os04g0191500	0.0511469	-1.35649	--	--	--	Os04g0191500, partial [Oryza sativa Japonica Group]
Os03g0352400	0.195673	0.477963	--	K14537|0|osa:4332852|nuclear/nucleolar GTPase 2	Ribosome biogenesis in eukaryotes (ko03008)	nuclear/nucleolar GTPase 2 [Oryza sativa Japonica Group]
Os04g0630000	0.685881	0.317191	Biological Process: ribosomal subunit export from nucleus (GO:0000054);; Biological Process: cytoskeleton organization (GO:0007010);;	--	--	Os04g0630000, partial [Oryza sativa Japonica Group]
Os05g0168500	0.34758	0.593527	Cellular Component: intrinsic component of membrane (GO:0031224);;	K17086|0|osa:4337924|transmembrane 9 superfamily member 12	--	transmembrane 9 superfamily member 12 [Oryza sativa Japonica Group]
Os12g0257000	0.0577821	-1.2462	--	K16296|0|osa:4351908|serine carboxypeptidase 1 isoform X2	--	serine carboxypeptidase 1 isoform X2 [Oryza sativa Japonica Group]
Os07g0607700	0.776252	0.215535	Molecular Function: transferase activity (GO:0016740);;	K11778|0|osa:4343863|dehydrodolichyl diphosphate synthase 6 isoform X1	Terpenoid backbone biosynthesis (ko00900)	dehydrodolichyl diphosphate synthase 6 isoform X1 [Oryza sativa Japonica Group]
Os07g0673400	0.230728	1.63231	--	--	--	universal stress protein PHOS34 [Oryza sativa Japonica Group]
Os03g0116800	0.799127	0.250552	--	--	--	F-box protein At4g00755 [Oryza sativa Japonica Group]
xxx_newGene_4488	0.141541	-1.24844	Cellular Component: intracellular membrane-bounded organelle (GO:0043231);;	--	--	hypothetical protein [Oryza sativa Japonica Group]
Os10g0537500	0.046726	2.17448	Cellular Component: intrinsic component of membrane (GO:0031224);;	--	--	Os10g0537500, partial [Oryza sativa Japonica Group]
Os01g0862200	0.327169	-0.850436	--	--	--	uncharacterized protein LOC4324744 [Oryza sativa Japonica Group]
Os04g0499200	0.0665471	-1.78966	Biological Process: pyrimidine nucleotide metabolic process (GO:0006220);; Biological Process: translation (GO:0006412);; Biological Process: Notch signaling pathway (GO:0007219);; Molecular Function: translation factor activity, RNA binding (GO:0008135);; Cellular Component: intracellular membrane-bounded organelle (GO:0043231);;	--	--	Os04g0499200, partial [Oryza sativa Japonica Group]
Os01g0208800	0.392709	-0.6803	Molecular Function: phosphoenolpyruvate carboxykinase activity (GO:0004611);; Biological Process: citrate metabolic process (GO:0006101);; Cellular Component: intracellular membrane-bounded organelle (GO:0043231);; Cellular Component: cytoplasmic part (GO:0044444);;	K01595|0|osa:4325531|phosphoenolpyruvate carboxylase 1	Pyruvate metabolism (ko00620);; Carbon fixation in photosynthetic organisms (ko00710);; Carbon metabolism (ko01200)	hypothetical protein OsI_00846 [Oryza sativa Indica Group]
Os12g0264650	0.881999	0.129362	--	--	--	Os12g0264650, partial [Oryza sativa Japonica Group]
Os07g0516000	0.766396	-0.230914	Cellular Component: intrinsic component of membrane (GO:0031224);;	--	--	uncharacterized protein LOC4343377 [Oryza sativa Japonica Group]
Os04g0656500	0.0952647	-1.19051	Molecular Function: nucleic acid binding (GO:0003676);; Biological Process: transcription, DNA-templated (GO:0006351);; Molecular Function: cation binding (GO:0043169);; Cellular Component: intracellular membrane-bounded organelle (GO:0043231);;	--	--	squamosa promoter-binding-like protein 8 [Oryza sativa Japonica Group]
Os02g0683900	0.000364894	-1.53346	Cellular Component: intrinsic component of membrane (GO:0031224);;	--	--	Os02g0683900 [Oryza sativa Japonica Group]
xxx_newGene_5693	0.358386	0.554113	--	--	--	OSJNBa0083D01.13 [Oryza sativa Japonica Group]
Os09g0560300	0.689137	0.24102	--	--	--	uncharacterized protein LOC101772363 [Setaria italica]
Os06g0700500	0.0223445	1.53943	Molecular Function: UDP-glycosyltransferase activity (GO:0008194);; Cellular Component: intrinsic component of membrane (GO:0031224);;	--	--	uncharacterized protein LOC4341964 isoform X1 [Oryza sativa Japonica Group]
Os05g0468900	0.15399	-1.71963	--	--	--	hypothetical protein OsI_20288 [Oryza sativa Indica Group]
Os05g0241100	0.291091	0.789949	--	K01869|0|osa:9272228|leucine--tRNA ligase, cytoplasmic	Aminoacyl-tRNA biosynthesis (ko00970)	hypothetical protein OsI_19117 [Oryza sativa Indica Group]
Os03g0274300	0.605797	0.735454	Molecular Function: nucleic acid binding (GO:0003676);;	--	--	hypothetical protein OsI_10944 [Oryza sativa Indica Group]
Os07g0687500	0.360909	0.59872	Molecular Function: catalytic activity (GO:0003824);; Cellular Component: intracellular membrane-bounded organelle (GO:0043231);;	--	--	rhodanese-like/PpiC domain-containing protein 12, chloroplastic [Oryza sativa Japonica Group]
Os02g0810400	0.303708	1.04631	--	K08960|0|osa:4331096|casein kinase I	--	casein kinase I [Oryza sativa Japonica Group]
Os01g0106400	4.96545e-05	2.93689	--	K23050|0|osa:4326149|isoflavone reductase homolog IRL	--	isoflavone reductase homolog IRL [Oryza sativa Japonica Group]
Os02g0804600	0.126411	-1.17494	--	--	--	Os02g0804600 [Oryza sativa Japonica Group]
Os01g0295700	0.0991392	2.44311	Molecular Function: phosphoprotein phosphatase activity (GO:0004721);; Biological Process: cellular protein modification process (GO:0006464);; Molecular Function: cation binding (GO:0043169);;	K14803|0|osa:4326717|probable protein phosphatase 2C 2	--	probable protein phosphatase 2C 2 [Oryza sativa Japonica Group]
Os09g0509100	0.00122691	-2.40801	Molecular Function: nucleic acid binding (GO:0003676);; Biological Process: transcription, DNA-templated (GO:0006351);; Cellular Component: intracellular membrane-bounded organelle (GO:0043231);;	--	--	NAC domain-containing protein 83 [Oryza sativa Japonica Group]
Os12g0547600	0.764996	0.446397	Molecular Function: protein binding (GO:0005515);; Biological Process: response to stimulus (GO:0050896);;	--	--	hypothetical protein OsJ_36411 [Oryza sativa Japonica Group]
Os05g0476700	0.160744	2.36137	--	--	--	U-box domain-containing protein 16 [Oryza sativa Japonica Group]
Os08g0135900	0.470499	1.01807	--	K01696|0|osa:4344612|tryptophan synthase beta chain 1	Glycine, serine and threonine metabolism (ko00260);; Phenylalanine, tyrosine and tryptophan biosynthesis (ko00400);; Biosynthesis of amino acids (ko01230)	tryptophan synthase beta chain 1 [Oryza sativa Japonica Group]
Os07g0175500	0.0063906	1.87009	--	--	--	Os07g0175500, partial [Oryza sativa Japonica Group]
Os01g0355500	0.84423	0.128791	--	--	--	auxilin-related protein 1 isoform X2 [Oryza sativa Japonica Group]
Os11g0117400	0.0685487	-1.95655	Molecular Function: nucleic acid binding transcription factor activity (GO:0001071);; Molecular Function: DNA binding (GO:0003677);; Biological Process: transcription, DNA-templated (GO:0006351);; Cellular Component: intracellular membrane-bounded organelle (GO:0043231);;	--	--	Os11g0117400, partial [Oryza sativa Japonica Group]
Os01g0144700	0.397779	0.637022	Cellular Component: intrinsic component of membrane (GO:0031224);; Cellular Component: intracellular membrane-bounded organelle (GO:0043231);;	--	--	uncharacterized protein LOC4325470 [Oryza sativa Japonica Group]
Os08g0180000	0.802983	0.1639	--	K00565|0|osa:4344818|mRNA cap guanine-N7 methyltransferase 1	mRNA surveillance pathway (ko03015)	mRNA cap guanine-N7 methyltransferase 1 [Oryza sativa Japonica Group]
Os06g0661766	0.194266	1.65995	Cellular Component: intracellular membrane-bounded organelle (GO:0043231);;	--	--	uncharacterized protein LOC9271699 [Oryza sativa Japonica Group]
Os02g0602900	0.614535	-1.02343	Cellular Component: intracellular membrane-bounded organelle (GO:0043231);;	--	--	unnamed protein product [Oryza sativa Japonica Group]
Os03g0665800	0.0182892	1.28048	Cellular Component: intrinsic component of membrane (GO:0031224);; Cellular Component: intracellular membrane-bounded organelle (GO:0043231);;	--	--	hypothetical protein OsI_12907 [Oryza sativa Indica Group]
Os03g0807200	0.616883	0.351078	--	--	--	uncharacterized protein LOC4334508 [Oryza sativa Japonica Group]
Os12g0540800	0.449833	0.451993	--	--	--	acyl-CoA-binding domain-containing protein 6-like [Oryza sativa Japonica Group]
Os12g0123700	5.69426e-05	2.7098	Molecular Function: nucleic acid binding (GO:0003676);; Biological Process: transcription, DNA-templated (GO:0006351);; Cellular Component: intracellular membrane-bounded organelle (GO:0043231);;	--	--	NAC transcription factor 29 [Oryza sativa Japonica Group]
Os10g0112500	0.0182706	-2.07079	--	--	--	protein NRT1/ PTR FAMILY 8.3 [Oryza sativa Japonica Group]
Os04g0640800	0.128228	0.787302	--	K14801|0|osa:4337167|programmed cell death protein 2-like isoform X1	--	programmed cell death protein 2-like isoform X1 [Oryza sativa Japonica Group]
Os01g0920400	0.973541	-0.0265422	Molecular Function: nucleoside-triphosphatase activity (GO:0017111);; Molecular Function: purine ribonucleoside binding (GO:0032550);;	--	--	hypothetical protein OsJ_04571 [Oryza sativa Japonica Group]
Os02g0590700	0.949561	-0.0466805	--	K08857|0|osa:4329828|serine/threonine-protein kinase Nek6	--	serine/threonine-protein kinase Nek6 [Oryza sativa Japonica Group]
Os03g0672300	0.242828	1.41453	Biological Process: pyruvate metabolic process (GO:0006090);; Biological Process: phosphate-containing compound metabolic process (GO:0006796);; Molecular Function: phosphotransferase activity, alcohol group as acceptor (GO:0016773);; Molecular Function: alkali metal ion binding (GO:0031420);; Cellular Component: intracellular membrane-bounded organelle (GO:0043231);;	K00873|0|osa:4333694|plastidial pyruvate kinase 1, chloroplastic	Glycolysis / Gluconeogenesis (ko00010);; Purine metabolism (ko00230);; Pyruvate metabolism (ko00620);; Carbon metabolism (ko01200);; Biosynthesis of amino acids (ko01230);; Biosynthesis of cofactors (ko01240)	plastidial pyruvate kinase 1, chloroplastic [Oryza sativa Japonica Group]
Os11g0131300	0.576808	1.20896	Biological Process: protein modification by small protein conjugation (GO:0032446);; Molecular Function: transition metal ion binding (GO:0046914);;	--	--	Os11g0131300 [Oryza sativa Japonica Group]
Os08g0359100	0.0201402	0.910081	--	K18693|0|osa:4345366|lipid phosphate phosphatase 2	Glycerolipid metabolism (ko00561);; Glycerophospholipid metabolism (ko00564)	hypothetical protein OsJ_27038 [Oryza sativa Japonica Group]
Os06g0605600	0.318673	0.632151	Molecular Function: nucleic acid binding (GO:0003676);; Cellular Component: intracellular membrane-bounded organelle (GO:0043231);;	K09422|0|osa:4341475|transcription factor GAMYB	--	GAMYB-like1 [Oryza sativa Japonica Group]
Os03g0197800	0.5406	0.337359	Molecular Function: cation binding (GO:0043169);; Molecular Function: organic cyclic compound binding (GO:0097159);;	--	--	protein indeterminate-domain 1 [Oryza sativa Japonica Group]
Os05g0440150	0.5109	0.838904	--	--	--	uncharacterized protein LOC9270028 isoform X3 [Oryza sativa Japonica Group]
Os11g0546900	0.18355	1.13831	Molecular Function: protein binding (GO:0005515);;	K06630|1.39211e-168|osa:4350697|14-3-3-like protein GF14-D	--	14-3-3-like protein GF14-D [Oryza sativa Japonica Group]
Os09g0420900	0.000725343	1.44274	Biological Process: cell communication (GO:0007154);; Biological Process: hormone transport (GO:0009914);; Biological Process: system development (GO:0048731);;	--	--	BTB/POZ domain-containing protein NPY1 [Oryza sativa Japonica Group]
Os03g0322800	0.0618227	2.06015	--	K23538|0|osa:4332687|ELMO domain-containing protein A isoform X1	--	ELMO domain-containing protein A [Oryza sativa Japonica Group]
Os06g0195600	0.590704	0.583866	Molecular Function: hydrolase activity, acting on ester bonds (GO:0016788);;	K22913|0|osa:4340387|phosphoinositide phosphatase SAC3	Inositol phosphate metabolism (ko00562)	phosphoinositide phosphatase SAC3 [Oryza sativa Japonica Group]
Os01g0917500	0.0625894	-1.00503	Biological Process: developmental process involved in reproduction (GO:0003006);; Molecular Function: protein kinase activity (GO:0004672);; Biological Process: cellular protein modification process (GO:0006464);; Biological Process: phosphate-containing compound metabolic process (GO:0006796);; Biological Process: embryo sac development (GO:0009553);; Biological Process: pollen development (GO:0…	--	--	leucine-rich repeat receptor protein kinase MSP1 [Oryza sativa Japonica Group]
Os10g0315400	0.819363	-0.118537	--	--	--	uncharacterized protein LOC4348292 isoform X1 [Oryza sativa Japonica Group]
Os03g0820600	0.00247024	1.80277	--	K05765|1.24834e-92|osa:4334595|actin-depolymerizing factor 4	--	actin-depolymerizing factor 4 [Oryza sativa Japonica Group]
Os01g0303600	0.0032939	4.372	Cellular Component: intrinsic component of membrane (GO:0031224);; Molecular Function: transition metal ion binding (GO:0046914);;	--	--	uncharacterized protein LOC4323902 [Oryza sativa Japonica Group]
Os01g0136400	0.550961	0.863223	Molecular Function: pattern binding (GO:0001871);; Molecular Function: protein kinase activity (GO:0004672);; Biological Process: cellular protein modification process (GO:0006464);; Biological Process: phosphate-containing compound metabolic process (GO:0006796);; Cellular Component: intrinsic component of membrane (GO:0031224);; Molecular Function: purine ribonucleoside binding (GO:0032550);;	--	--	LEAF RUST 10 DISEASE-RESISTANCE LOCUS RECEPTOR-LIKE PROTEIN KINASE-like 1.2 isoform X1 [Oryza sativa Japonica Group]
Os01g0149500	0.0655282	-3.65558	Molecular Function: purine ribonucleoside binding (GO:0032550);;	--	--	putative disease resistance protein RGA1 [Oryza sativa Japonica Group]
Os05g0526200	0.79742	0.137423	Cellular Component: plastid envelope (GO:0009526);; Cellular Component: plastid stroma (GO:0009532);;	--	--	photosystem I assembly factor PSA3, chloroplastic [Oryza sativa Japonica Group]
Os04g0504000	0.0120054	-1.28005	Molecular Function: transferase activity, transferring pentosyl groups (GO:0016763);; Cellular Component: intrinsic component of membrane (GO:0031224);; Biological Process: purine nucleobase salvage (GO:0043096);; Cellular Component: intracellular part (GO:0044424);;	--	--	OSJNBa0014K14.11 [Oryza sativa Japonica Group]
Os06g0601600	0.000218328	-2.05652	Molecular Function: cellulose synthase activity (GO:0016759);; Biological Process: cellulose metabolic process (GO:0030243);; Cellular Component: intrinsic component of membrane (GO:0031224);; Biological Process: external encapsulating structure organization (GO:0045229);;	--	--	Os06g0601600, partial [Oryza sativa Japonica Group]
Os03g0284600	0.158581	-1.08287	Cellular Component: plastid (GO:0009536);;	--	--	UPF0308 protein, chloroplast precursor, putative, expressed [Oryza sativa Japonica Group]
Os06g0724900	0.645733	0.68819	Biological Process: cellular protein modification process (GO:0006464);; Molecular Function: kinase activity (GO:0016301);; Molecular Function: carboxylic acid binding (GO:0031406);; Molecular Function: purine ribonucleoside binding (GO:0032550);;	--	--	serine/threonine-protein kinase STY46 [Oryza sativa Japonica Group]
Os08g0436000	0.403532	0.297037	Molecular Function: small molecule binding (GO:0036094);; Molecular Function: organic cyclic compound binding (GO:0097159);;	K14948|0|osa:4345664|polypyrimidine tract-binding protein homolog 1 isoform X1	--	polypyrimidine tract-binding protein homolog 1 isoform X1 [Oryza sativa Japonica Group]
Os07g0438500	0.970303	0.0478283	Biological Process: cellular protein modification process (GO:0006464);; Molecular Function: kinase activity (GO:0016301);; Molecular Function: purine ribonucleoside binding (GO:0032550);;	--	--	Os07g0438500, partial [Oryza sativa Japonica Group]
Os01g0708900	0.669201	0.505809	--	--	--	mitochondrial carrier protein CoAc1 [Oryza sativa Japonica Group]
Os02g0555600	0.00122937	-2.16432	Molecular Function: carboxylic acid binding (GO:0031406);;	--	--	ACT domain-containing protein ACR3 isoform X1 [Oryza sativa Japonica Group]
Os01g0571000	0.0758701	2.70236	--	--	--	mitochondrial carrier protein CoAc1 [Oryza sativa Japonica Group]
Os04g0583900	8.16179e-05	6.15644	Molecular Function: nucleic acid binding (GO:0003676);; Biological Process: transcription, DNA-templated (GO:0006351);; Cellular Component: intracellular membrane-bounded organelle (GO:0043231);;	--	--	hypothetical protein OsJ_15918 [Oryza sativa Japonica Group]
Os06g0171700	0.461911	0.505218	--	K10842|5.16e-121|osa:4340268|uncharacterized protein LOC4340268	Basal transcription factors (ko03022);; Nucleotide excision repair (ko03420)	uncharacterized protein LOC4340268 [Oryza sativa Japonica Group]
Os02g0822300	0.617395	0.198649	--	--	--	Os02g0822300 [Oryza sativa Japonica Group]
Os05g0552200	0.187664	-0.713445	Biological Process: cellular protein modification process (GO:0006464);; Molecular Function: transferase activity, transferring hexosyl groups (GO:0016758);; Cellular Component: intrinsic component of membrane (GO:0031224);; Cellular Component: Golgi apparatus part (GO:0044431);;	--	--	beta-1,3-galactosyltransferase pvg3 [Oryza sativa Japonica Group]
Os12g0112200	0.774774	0.215515	--	K12382|6.08568e-178|osa:9267024|uncharacterized protein LOC9267024	Sphingolipid metabolism (ko00600)	uncharacterized protein LOC9267024 [Oryza sativa Japonica Group]
Os02g0634800	0.101581	-0.556192	--	K10689|2.86959e-112|sita:101765715|protein PEROXIN-4	--	protein PEROXIN-4 [Setaria italica]
Os02g0697450	0.00143857	-2.45915	--	K01904|0|osa:4330407|probable 4-coumarate--CoA ligase 2	Ubiquinone and other terpenoid-quinone biosynthesis (ko00130);; Phenylpropanoid biosynthesis (ko00940)	hypothetical protein OsJ_08027 [Oryza sativa Japonica Group]
Os04g0551800	0.174373	0.733461	Molecular Function: protein binding (GO:0005515);; Cellular Component: cytoplasm (GO:0005737);; Biological Process: cellular process (GO:0009987);; Molecular Function: purine ribonucleoside binding (GO:0032550);;	K09493|0|osa:4336600|T-complex protein 1 subunit alpha	--	T-complex protein 1 subunit alpha [Oryza sativa Japonica Group]
Os02g0177900	0.351827	-0.637465	--	--	--	Os02g0177900, partial [Oryza sativa Japonica Group]
Os12g0233800	0.655449	0.283488	Molecular Function: nucleic acid binding transcription factor activity (GO:0001071);; Molecular Function: DNA binding (GO:0003677);; Biological Process: transcription, DNA-templated (GO:0006351);; Cellular Component: intracellular membrane-bounded organelle (GO:0043231);;	--	--	bZIP transcription factor family protein, expressed [Oryza sativa Japonica Group]
Os12g0175500	0.38513	0.491284	Biological Process: ion transport (GO:0006811);; Cellular Component: plastid stroma (GO:0009532);; Molecular Function: disulfide oxidoreductase activity (GO:0015036);; Biological Process: cellular homeostasis (GO:0019725);; Molecular Function: cation binding (GO:0043169);; Biological Process: single-organism metabolic process (GO:0044710);; Molecular Function: iron-sulfur cluster binding (GO:0051…	--	--	monothiol glutaredoxin-S12, chloroplastic [Oryza sativa Japonica Group]
Os02g0761500	0.799121	0.207943	--	--	--	Os02g0761500, partial [Oryza sativa Japonica Group]
Os02g0578800	0.590952	0.568297	Cellular Component: intrinsic component of membrane (GO:0031224);;	--	--	uncharacterized endoplasmic reticulum membrane protein YGL010W [Oryza sativa Japonica Group]
Os02g0632500	0.860813	0.116584	Molecular Function: enzyme activator activity (GO:0008047);; Biological Process: regulation of GTPase activity (GO:0043087);; Cellular Component: intracellular part (GO:0044424);;	K12489|0|osa:4330061|ADP-ribosylation factor GTPase-activating protein AGD2	Endocytosis (ko04144)	ADP-ribosylation factor GTPase-activating protein AGD2 [Oryza sativa Japonica Group]
Os03g0318600	0.762432	0.352274	Molecular Function: nucleic acid binding transcription factor activity (GO:0001071);; Molecular Function: DNA binding (GO:0003677);; Biological Process: transcription, DNA-templated (GO:0006351);;	K14431|0|osa:4332660|transcription factor TGA2	Plant hormone signal transduction (ko04075)	transcription factor TGA2.2 [Oryza sativa Japonica Group]
Os07g0622900	0.161782	1.54424	Cellular Component: endoplasmic reticulum membrane (GO:0005789);; Biological Process: protein processing (GO:0016485);; Molecular Function: hydrolase activity (GO:0016787);; Cellular Component: intrinsic component of membrane (GO:0031224);;	--	--	signal peptidase complex-like protein DTM1 [Setaria italica]
Os11g0637800	0.340296	0.740931	Molecular Function: acylglycerol O-acyltransferase activity (GO:0016411);; Cellular Component: intrinsic component of membrane (GO:0031224);; Biological Process: CDP-diacylglycerol metabolic process (GO:0046341);;	K13523|0|osa:4350987|1-acyl-sn-glycerol-3-phosphate acyltransferase PLS1	Glycerolipid metabolism (ko00561);; Glycerophospholipid metabolism (ko00564)	1-acyl-sn-glycerol-3-phosphate acyltransferase PLS1 [Oryza sativa Japonica Group]
Os08g0230200	0.245001	-1.37625	Cellular Component: intrinsic component of membrane (GO:0031224);;	--	--	Os08g0230200, partial [Oryza sativa Japonica Group]
Os02g0164800	0.956197	0.0902131	Cellular Component: cytoplasm (GO:0005737);;	--	--	unknown protein [Oryza sativa Japonica Group]
Os09g0510200	0.258062	0.604367	--	--	--	cilia- and flagella-associated protein 20 [Oryza sativa Japonica Group]
Os07g0546200	3.36753e-05	-1.82527	--	--	--	Os07g0546200, partial [Oryza sativa Japonica Group]
Os03g0257600	0.141665	1.02814	Biological Process: protein localization (GO:0008104);;	--	--	uncharacterized protein LOC4332301 [Oryza sativa Japonica Group]
Os01g0609900	0.000493882	6.36927	--	--	--	Os01g0609900, partial [Oryza sativa Japonica Group]
Os07g0559400	0.0885589	1.55629	--	--	--	uncharacterized protein LOC4343589 [Oryza sativa Japonica Group]
Os02g0798100	0.404291	1.34924	Cellular Component: Golgi apparatus (GO:0005794);; Molecular Function: acetylglucosaminyltransferase activity (GO:0008375);; Biological Process: oligosaccharide metabolic process (GO:0009311);; Cellular Component: intrinsic component of membrane (GO:0031224);;	K00736|0|osa:9266501|alpha-1,6-mannosyl-glycoprotein 2-beta-N-acetylglucosaminyltransferase	N-Glycan biosynthesis (ko00510);; Various types of N-glycan biosynthesis (ko00513)	alpha-1,6-mannosyl-glycoprotein 2-beta-N-acetylglucosaminyltransferase [Oryza sativa Japonica Group]
Os08g0545200	0.447146	0.50216	Molecular Function: catalytic activity (GO:0003824);; Biological Process: single-organism metabolic process (GO:0044710);; Molecular Function: transition metal ion binding (GO:0046914);;	--	--	sorbitol dehydrogenase isoform X2 [Oryza sativa Japonica Group]
Os06g0701100	0.0150565	1.02619	--	K03257|0|osa:4341966|eukaryotic initiation factor 4A-1	RNA transport (ko03013)	eukaryotic initiation factor 4A-1 [Oryza sativa Japonica Group]
Os04g0548300	0.659623	0.343176	Biological Process: gene expression (GO:0010467);; Biological Process: RNA metabolic process (GO:0016070);; Cellular Component: preribosome (GO:0030684);;	--	--	Os04g0548300, partial [Oryza sativa Japonica Group]
Os07g0658300	0.319492	0.416545	--	--	--	rho GTPase-activating protein 7 isoform X2 [Oryza sativa Japonica Group]
Os01g0917400	0.0875538	-0.949217	Molecular Function: nucleic acid binding (GO:0003676);; Molecular Function: cation binding (GO:0043169);; Cellular Component: intracellular membrane-bounded organelle (GO:0043231);;	--	--	zinc finger CCCH domain-containing protein 12 [Oryza sativa Japonica Group]
Os05g0555000	0.949952	-0.0550822	--	--	--	uncharacterized protein LOC9270322 isoform X1 [Oryza sativa Japonica Group]
Os01g0971600	0.00841751	3.84482	Molecular Function: nucleotide binding (GO:0000166);; Biological Process: glycerol-3-phosphate metabolic process (GO:0006072);; Molecular Function: oxidoreductase activity, acting on the CH-OH group of donors, NAD or NADP as acceptor (GO:0016616);; Biological Process: primary metabolic process (GO:0044238);; Cellular Component: cytoplasmic part (GO:0044444);; Biological Process: single-organism m…	--	--	glycerol-3-phosphate dehydrogenase [NAD(+)] [Oryza sativa Japonica Group]
Os10g0339400	0.882544	-0.0853476	Molecular Function: nucleic acid binding (GO:0003676);; Biological Process: transcription, DNA-templated (GO:0006351);; Molecular Function: cytoskeletal protein binding (GO:0008092);; Cellular Component: actin cytoskeleton (GO:0015629);; Molecular Function: nucleoside-triphosphatase activity (GO:0017111);; Molecular Function: purine ribonucleoside binding (GO:0032550);; Cellular Component: intrac…	K10357|0|osa:4348352|myosin-15	--	myosin, putative, expressed [Oryza sativa Japonica Group]
Os02g0769100	0.0462858	-1.34309	--	K14488|9.92401e-35|osa:4330855|auxin-responsive protein SAUR32	Plant hormone signal transduction (ko04075)	auxin-responsive protein SAUR32 [Oryza sativa Japonica Group]
Os06g0681200	2.99325e-08	8.99202	--	--	--	hypothetical protein EE612_036093 [Oryza sativa]
Os04g0577200	0.00166092	1.18767	--	--	--	rho GTPase-activating protein 5 [Oryza sativa Japonica Group]
Os05g0334750	0.223752	-1.10541	Molecular Function: protein kinase activity (GO:0004672);; Biological Process: cellular protein modification process (GO:0006464);; Biological Process: phosphate-containing compound metabolic process (GO:0006796);; Biological Process: cell communication (GO:0007154);; Molecular Function: purine ribonucleoside binding (GO:0032550);;	--	--	CBL-interacting protein kinase 22 [Oryza sativa Japonica Group]
Os05g0209500	0.820599	0.193	Cellular Component: intrinsic component of membrane (GO:0031224);;	--	--	uncharacterized protein LOC8055740 [Sorghum bicolor]
Os12g0157200	0.495641	0.572401	Molecular Function: metal ion binding (GO:0046872);;	--	--	TLD domain-containing protein 1 isoform X2 [Oryza sativa Japonica Group]
Os04g0661300	0.381798	0.827056	--	--	--	protein HEAT INTOLERANT 4 [Oryza sativa Japonica Group]
Os09g0259200	0.391882	0.800579	--	K15382|2.20063e-120|osa:4346541|LOW QUALITY PROTEIN: bidirectional sugar transporter SWEET7b-like	--	RecName: Full=Bidirectional sugar transporter SWEET7b; Short=OsSWEET7b
Os03g0844500	0.815026	0.130005	Biological Process: cell communication (GO:0007154);; Cellular Component: protein serine/threonine phosphatase complex (GO:0008287);; Cellular Component: intracellular membrane-bounded organelle (GO:0043231);; Biological Process: regulation of phosphoprotein phosphatase activity (GO:0043666);;	K11584|0|osa:4334757|serine/threonine protein phosphatase 2A 57 kDa regulatory subunit B' theta isoform	mRNA surveillance pathway (ko03015)	serine/threonine protein phosphatase 2A 57 kDa regulatory subunit B&apos; theta isoform [Oryza sativa Japonica Group]
Os02g0322400	0.0312417	-1.81858	--	--	--	mitogen-activated protein kinase kinase kinase 18 [Oryza sativa Japonica Group]
Os04g0477500	0.184351	-0.786225	--	K00737|0|osa:4336162|beta-1,4-mannosyl-glycoprotein 4-beta-N-acetylglucosaminyltransferase	N-Glycan biosynthesis (ko00510)	beta-1,4-mannosyl-glycoprotein 4-beta-N-acetylglucosaminyltransferase [Oryza sativa Japonica Group]
Os01g0884400	0.289499	0.929462	--	--	--	Os01g0884400, partial [Oryza sativa Japonica Group]
Os02g0721700	0.160898	-1.17071	Cellular Component: intrinsic component of membrane (GO:0031224);;	--	--	GPI-anchored protein LLG1 [Oryza sativa Japonica Group]
Os04g0525000	0.270443	-0.828452	--	--	--	large ribosomal RNA subunit accumulation protein YCED homolog 2, chloroplastic [Oryza sativa Japonica Group]
xxx_newGene_6077	0.297514	0.567451	Cellular Component: intracellular membrane-bounded organelle (GO:0043231);;	--	--	OSJNBa0079A21.10 [Oryza sativa Japonica Group]
Os04g0415600	0.0525752	-1.82951	Biological Process: copper ion transport (GO:0006825);; Cellular Component: intrinsic component of membrane (GO:0031224);; Molecular Function: transition metal ion transmembrane transporter activity (GO:0046915);;	--	--	copper transporter 6 [Oryza sativa Japonica Group]
Os04g0474900	0.358238	0.551947	--	K01188|0|osa:4336146|beta-glucosidase 13	Cyanoamino acid metabolism (ko00460);; Starch and sucrose metabolism (ko00500);; Phenylpropanoid biosynthesis (ko00940)	beta-glucosidase 13 [Oryza sativa Japonica Group]
Os03g0707300	0.942724	-0.0399187	--	--	--	uncharacterized protein LOC4333859 isoform X1 [Oryza sativa Japonica Group]
Os04g0475600	0.0933658	2.40438	--	K23947|1.18026e-179|osa:4336150|2-oxoglutarate-dependent dioxygenase DAO	Tryptophan metabolism (ko00380)	2-oxoglutarate-dependent dioxygenase DAO [Oryza sativa Japonica Group]
Os04g0611200	0.0781197	0.79678	Molecular Function: transferase activity, transferring acyl groups (GO:0016746);;	--	--	protein ECERIFERUM 26-like [Oryza sativa Japonica Group]
Os01g0602200	0.167174	-0.813322	--	--	--	cytochrome P450 72A15 [Oryza sativa Japonica Group]
Os11g0265900	0.0545363	-1.20624	--	--	--	disease resistance protein RGA5-like [Oryza sativa Japonica Group]
Os01g0158000	0.438398	0.751015	--	K15042|0|osa:4324088|importin subunit alpha-2	--	importin subunit alpha-2 [Oryza sativa Japonica Group]
Os01g0767600	0.0158373	3.89857	--	--	--	uncharacterized protein LOC4325501 isoform X1 [Oryza sativa Japonica Group]
Os08g0282400	0.416998	0.728932	--	K15296|0|osa:4345167|alpha-soluble NSF attachment protein 2	--	alpha-soluble NSF attachment protein 2 [Oryza sativa Japonica Group]
Os03g0262100	0.840642	0.166555	--	K14294|2.5857e-122|osa:4332324|partner of Y14 and mago isoform X1	RNA transport (ko03013);; mRNA surveillance pathway (ko03015)	partner of Y14 and mago isoform X1 [Oryza sativa Japonica Group]
xxx_newGene_11329	0.778891	0.20912	--	--	--	F-box protein family-like [Oryza sativa Japonica Group]
Os08g0430200	0.143117	1.22077	Molecular Function: DNA binding (GO:0003677);; Biological Process: DNA repair (GO:0006281);; Biological Process: ubiquitin-dependent protein catabolic process (GO:0006511);; Cellular Component: intracellular membrane-bounded organelle (GO:0043231);;	K10839|0|osa:4345632|probable ubiquitin receptor RAD23 isoform X1	Nucleotide excision repair (ko03420);; Protein processing in endoplasmic reticulum (ko04141)	probable ubiquitin receptor RAD23 isoform X1 [Oryza sativa Japonica Group]
Os07g0182200	0.331323	-0.480456	--	--	--	Os07g0182200 [Oryza sativa Japonica Group]
Os06g0146250	0.0890836	-1.01094	Molecular Function: nucleic acid binding transcription factor activity (GO:0001071);; Molecular Function: DNA binding (GO:0003677);; Biological Process: transcription, DNA-templated (GO:0006351);; Molecular Function: purine ribonucleoside binding (GO:0032550);;	--	--	probable WRKY transcription factor 72 isoform X2 [Oryza sativa Japonica Group]
Os07g0288700	0.0105278	-3.22104	--	--	--	ABC transporter G family member 11 [Oryza sativa Japonica Group]
Os07g0545800	0.66221	0.470331	--	--	--	chitin-inducible gibberellin-responsive protein 1 isoform X1 [Oryza sativa Japonica Group]
Os01g0970400	0.217064	0.999254	Biological Process: translation (GO:0006412);; Molecular Function: translation factor activity, RNA binding (GO:0008135);; Cellular Component: intracellular part (GO:0044424);;	K03259|1.77911e-126|osa:4323837|eukaryotic translation initiation factor 4E-1	RNA transport (ko03013)	eukaryotic translation initiation factor 4E-1 [Oryza sativa Japonica Group]
Os04g0117600	0.276259	0.497257	--	K05544|0|osa:4334955|LOW QUALITY PROTEIN: tRNA-dihydrouridine(47) synthase [NAD(P)(+)]-like	--	RecName: Full=tRNA-dihydrouridine(47) synthase [NAD(P)(+)]-like; AltName: Full=Zinc finger CCCH domain-containing protein 26; Short=OsC3H26; AltName: Full=tRNA-dihydrouridine synthase 3-like
Os01g0948400	0.239169	1.00559	--	K00286|1.1166e-162|osa:4325755|pyrroline-5-carboxylate reductase	Arginine and proline metabolism (ko00330);; Biosynthesis of amino acids (ko01230)	pyrroline-5-carboxylate reductase [Oryza sativa Japonica Group]
Os11g0634500	0.00190604	1.64015	--	K02980|2.60162e-30|osa:9267266|40S ribosomal protein S29	Ribosome (ko03010)	Os11g0634500 [Oryza sativa Japonica Group]
Os06g0198500	0.187674	0.964589	--	K09705|4.48266e-144|osa:4340398|uncharacterized protein LOC4340398	--	uncharacterized protein LOC4340398 [Oryza sativa Japonica Group]
Os03g0305050	0.0251359	-1.1044	--	K01913|0|osa:4332592|acetate/butyrate--CoA ligase AAE7, peroxisomal	Glycolysis / Gluconeogenesis (ko00010);; Pyruvate metabolism (ko00620);; Glyoxylate and dicarboxylate metabolism (ko00630);; Butanoate metabolism (ko00650);; Carbon metabolism (ko01200)	acetate/butyrate--CoA ligase AAE7, peroxisomal [Oryza sativa Japonica Group]
Os07g0436100	0.79911	-0.132777	--	K21437|0|osa:9268481|ankyrin repeat domain-containing protein 13B	--	ankyrin repeat domain-containing protein 13B [Oryza sativa Japonica Group]
Os05g0568100	0.262591	0.842285	--	K22068|4.55553e-84|osa:4339646|iron-sulfur cluster assembly scaffold protein IscU	--	uncharacterized protein LOC4339646 [Oryza sativa Japonica Group]
Os11g0128700	0.325963	0.560916	Biological Process: mitotic cell cycle (GO:0000278);; Biological Process: phosphate-containing compound metabolic process (GO:0006796);; Molecular Function: transferase activity, transferring phosphorus-containing groups (GO:0016772);;	--	--	Os11g0128700 [Oryza sativa Japonica Group]
Os10g0431000	0.655449	0.325068	Cellular Component: intracellular membrane-bounded organelle (GO:0043231);; Molecular Function: transition metal ion binding (GO:0046914);; Molecular Function: organic cyclic compound binding (GO:0097159);;	K10624|0|osa:4348695|E3 ubiquitin-protein ligase RBBP6 isoform X1	--	Os10g0431000, partial [Oryza sativa Japonica Group]
Os11g0106100	0.636202	0.538597	--	--	--	probable transcription factor RL9 isoform X1 [Oryza sativa Japonica Group]
Os09g0306800	0.877716	-0.0794756	--	--	--	Os09g0306800, partial [Oryza sativa Japonica Group]
Os02g0751100	0.329115	1.34074	--	--	--	aspartic proteinase-like protein 1 [Oryza sativa Japonica Group]
Os02g0749150	0.58163	0.423254	--	--	--	Os02g0749150, partial [Oryza sativa Japonica Group]
Os08g0521200	0.128493	-0.959562	Biological Process: cellular protein modification process (GO:0006464);; Biological Process: phosphate-containing compound metabolic process (GO:0006796);; Molecular Function: kinase activity (GO:0016301);; Cellular Component: intrinsic component of membrane (GO:0031224);; Molecular Function: purine ribonucleoside binding (GO:0032550);;	--	--	pollen receptor-like kinase 5 [Oryza sativa Japonica Group]
Os05g0358000	0.105497	-0.792788	--	--	--	Os05g0358000, partial [Oryza sativa Japonica Group]
Os05g0323100	0.49075	0.424097	Cellular Component: intracellular membrane-bounded organelle (GO:0043231);;	--	--	rhodanese-like domain-containing protein 7 [Oryza sativa Japonica Group]
Os03g0158700	0.28398	1.32466	--	--	--	subtilisin-like protease SBT3.18 isoform X2 [Oryza sativa Japonica Group]
Os11g0249900	0.434572	0.419916	--	--	--	Os11g0249900, partial [Oryza sativa Japonica Group]
Os03g0786000	0.0925539	1.91255	Cellular Component: intracellular membrane-bounded organelle (GO:0043231);;	--	--	expressed protein [Oryza sativa Japonica Group]
Os05g0108300	0.0137688	-0.866346	--	K08867|0|osa:4337579|probable serine/threonine-protein kinase WNK2	--	probable serine/threonine-protein kinase WNK2 [Oryza sativa Japonica Group]
Os05g0479900	0.0563742	-1.61617	--	--	--	uncharacterized protein LOC4339114 [Oryza sativa Japonica Group]
Os01g0571700	0.775348	0.253486	Molecular Function: nucleic acid binding (GO:0003676);; Biological Process: transcription, DNA-templated (GO:0006351);; Biological Process: translation (GO:0006412);; Cellular Component: plastid (GO:0009536);; Molecular Function: ligase activity, forming aminoacyl-tRNA and related compounds (GO:0016876);; Cellular Component: intrinsic component of membrane (GO:0031224);; Molecular Function: purin…	--	--	Os01g0571700, partial [Oryza sativa Japonica Group]
Os01g0976600	0.749941	0.277491	--	K06127|0|osa:4324310|2-methoxy-6-polyprenyl-1,4-benzoquinol methylase, mitochondrial	Ubiquinone and other terpenoid-quinone biosynthesis (ko00130);; Biosynthesis of cofactors (ko01240)	2-methoxy-6-polyprenyl-1,4-benzoquinol methylase, mitochondrial [Oryza sativa Japonica Group]
Os10g0417600	0.000729552	1.18178	Molecular Function: racemase and epimerase activity, acting on carbohydrates and derivatives (GO:0016857);; Biological Process: L-ascorbic acid metabolic process (GO:0019852);; Molecular Function: cofactor binding (GO:0048037);;	K10046|0|osa:4348636|GDP-mannose 3,5-epimerase 1	Ascorbate and aldarate metabolism (ko00053);; Amino sugar and nucleotide sugar metabolism (ko00520);; Biosynthesis of cofactors (ko01240)	GDP-mannose 3,5-epimerase 1 [Oryza sativa Japonica Group]
Os04g0670800	0.471684	0.392185	--	--	--	hypothetical protein OG_BBa0063K01.4 [Oryza glaberrima]
Os06g0567950	0.249691	0.657438	--	K00423|0|osa:4341337|L-ascorbate oxidase isoform X1	Ascorbate and aldarate metabolism (ko00053)	L-ascorbate oxidase isoform X1 [Oryza sativa Japonica Group]
Os03g0835150	0.16764	1.97721	--	--	--	uncharacterized protein LOC112938279 [Oryza sativa Japonica Group]
Os11g0530650	0.000119719	-2.68561	Biological Process: flavonoid metabolic process (GO:0009812);; Molecular Function: transferase activity, transferring acyl groups other than amino-acyl groups (GO:0016747);;	K00660|0|osa:4350636|chalcone synthase 1	Flavonoid biosynthesis (ko00941);; Circadian rhythm - plant (ko04712)	chalcone synthase 1 [Oryza sativa Japonica Group]
xxx_newGene_4327	0.740384	0.350768	Cellular Component: intrinsic component of membrane (GO:0031224);; Cellular Component: intracellular membrane-bounded organelle (GO:0043231);;	--	--	hypothetical protein [Oryza sativa Japonica Group]
Os02g0286933	0.185643	-1.90305	Cellular Component: intrinsic component of membrane (GO:0031224);;	--	--	Os02g0286933 [Oryza sativa Japonica Group]
Os05g0491500	0.0189575	-2.61484	Molecular Function: nucleic acid binding (GO:0003676);; Biological Process: transcription, DNA-templated (GO:0006351);; Cellular Component: intracellular membrane-bounded organelle (GO:0043231);;	--	--	hypothetical protein OsJ_19028 [Oryza sativa Japonica Group]
Os01g0793900	0.791821	0.367617	--	--	--	uncharacterized protein LOC4324133 [Oryza sativa Japonica Group]
Os07g0119300	0.750648	0.217383	Molecular Function: nucleic acid binding (GO:0003676);; Biological Process: transcription, DNA-templated (GO:0006351);; Cellular Component: intracellular membrane-bounded organelle (GO:0043231);;	--	--	myb family transcription factor EFM [Oryza sativa Japonica Group]
Os11g0153900	0.789136	0.182955	--	K10743|0|osa:4349811|ribonuclease H2 subunit A	DNA replication (ko03030)	ribonuclease H2 subunit A [Oryza sativa Japonica Group]
Os01g0872100	0.0018861	-1.34243	--	--	--	uncharacterized protein LOC4324947 [Oryza sativa Japonica Group]
Os07g0681300	0.00682983	-2.09987	--	K20666|0|osa:4344303|cytochrome P450 714B1	Diterpenoid biosynthesis (ko00904)	putative cytochrome P450 [Oryza sativa Japonica Group]
Os03g0214100	0.0207519	1.28425	Molecular Function: nucleic acid binding (GO:0003676);; Biological Process: DNA metabolic process (GO:0006259);; Biological Process: cellular response to stress (GO:0033554);; Molecular Function: cation binding (GO:0043169);; Cellular Component: intracellular membrane-bounded organelle (GO:0043231);; Cellular Component: protein complex (GO:0043234);;	K07466|0|osa:4332052|replication protein A 70 kDa DNA-binding subunit B	DNA replication (ko03030);; Nucleotide excision repair (ko03420);; Mismatch repair (ko03430);; Homologous recombination (ko03440)	replication protein A 70 kDa DNA-binding subunit B [Oryza sativa Japonica Group]
Os01g0710200	0.00166092	-3.11059	--	K12259|0|osa:4327828|probable polyamine oxidase 5	Arginine and proline metabolism (ko00330);; beta-Alanine metabolism (ko00410)	probable polyamine oxidase 5 [Oryza sativa Japonica Group]
Os01g0179600	0.000122456	-2.72835	--	--	--	crocetin glucosyltransferase, chloroplastic [Oryza sativa Japonica Group]
Os08g0400200	0.386124	1.00908	--	K11420|0|osa:4345509|uncharacterized protein LOC4345509	--	uncharacterized protein LOC4345509 [Oryza sativa Japonica Group]
Os07g0673100	0.0898376	1.26026	--	K14842|3.442e-180|osa:4344253|ribosome biogenesis protein NSA2 homolog	--	ribosome biogenesis protein NSA2 homolog [Oryza sativa Japonica Group]
Os02g0596100	0.592786	0.253329	--	--	--	Os02g0596100, partial [Oryza sativa Japonica Group]
Os01g0187000	0.622067	0.520399	--	--	--	hypothetical protein OsI_00699 [Oryza sativa Indica Group]
Os10g0486100	0.00031185	2.03488	Molecular Function: oxidoreductase activity (GO:0016491);; Cellular Component: intrinsic component of membrane (GO:0031224);; Biological Process: single-organism metabolic process (GO:0044710);; Molecular Function: tetrapyrrole binding (GO:0046906);; Molecular Function: transition metal ion binding (GO:0046914);;	K15402|0|osa:4348947|cytochrome P450 86B1	Cutin, suberine and wax biosynthesis (ko00073)	cytochrome P450 86B1 [Oryza sativa Japonica Group]
Os12g0632900	0.0140598	-1.32276	Biological Process: regionalization (GO:0003002);; Molecular Function: protein kinase activity (GO:0004672);; Biological Process: cellular protein modification process (GO:0006464);; Biological Process: nitrate transport (GO:0015706);; Cellular Component: intrinsic component of membrane (GO:0031224);; Molecular Function: purine ribonucleoside binding (GO:0032550);; Molecular Function: peptide bin…	--	--	receptor protein-tyrosine kinase CEPR1 [Oryza sativa Japonica Group]
Os10g0391300	0.117055	1.96942	Molecular Function: nucleic acid binding (GO:0003676);; Molecular Function: cation binding (GO:0043169);;	--	--	Os10g0391300 [Oryza sativa Japonica Group]
Os05g0304501	0.151822	-0.79913	Biological Process: fatty acid biosynthetic process (GO:0006633);; Molecular Function: oxidoreductase activity, acting on single donors with incorporation of molecular oxygen (GO:0016701);; Cellular Component: intrinsic component of membrane (GO:0031224);; Molecular Function: cation binding (GO:0043169);; Cellular Component: intracellular membrane-bounded organelle (GO:0043231);;	--	--	Os05g0304501 [Oryza sativa Japonica Group]
Os04g0485100	0.995829	0.0034408	--	K11584|0|osa:4336207|serine/threonine protein phosphatase 2A 57 kDa regulatory subunit B' theta isoform	mRNA surveillance pathway (ko03015)	serine/threonine protein phosphatase 2A 57 kDa regulatory subunit B&apos; theta isoform [Oryza sativa Japonica Group]
Os04g0689700	0.203647	-1.08379	Molecular Function: small molecule binding (GO:0036094);; Molecular Function: organic cyclic compound binding (GO:0097159);;	--	--	uncharacterized protein LOC4337492 [Oryza sativa Japonica Group]
Os01g0719600	3.61665e-11	-3.56918	--	--	--	protein SODIUM POTASSIUM ROOT DEFECTIVE 2 [Oryza sativa Japonica Group]
Os12g0580600	0.158492	1.33134	--	--	--	Os12g0580600, partial [Oryza sativa Japonica Group]
Os02g0572400	0.565003	0.905828	--	K14652|0|osa:4329733|probable bifunctional riboflavin biosynthesis protein RIBA 2, chloroplastic	Riboflavin metabolism (ko00740);; Folate biosynthesis (ko00790);; Biosynthesis of cofactors (ko01240)	probable bifunctional riboflavin biosynthesis protein RIBA 2, chloroplastic [Oryza sativa Japonica Group]
Os02g0692700	0.239169	0.61764	--	--	--	Os02g0692700, partial [Oryza sativa Japonica Group]
Os07g0137200	0.976826	0.0249746	--	--	--	uncharacterized protein LOC4342358 [Oryza sativa Japonica Group]
Os04g0685700	0.327689	0.893261	Cellular Component: intracellular membrane-bounded organelle (GO:0043231);;	--	--	uncharacterized protein LOC9267051 [Oryza sativa Japonica Group]
Os05g0148700	0.455243	-0.628967	Biological Process: developmental process involved in reproduction (GO:0003006);; Biological Process: response to oxidative stress (GO:0006979);; Cellular Component: plastid (GO:0009536);; Biological Process: cellular metabolic process (GO:0044237);; Biological Process: leaf development (GO:0048366);;	--	--	senescence-associated protein OSA15, chloroplastic [Oryza sativa Japonica Group]
Os03g0648400	0.0853	1.33853	Molecular Function: protein binding (GO:0005515);; Biological Process: response to stress (GO:0006950);; Biological Process: cellular process (GO:0009987);; Molecular Function: purine ribonucleoside binding (GO:0032550);; Molecular Function: cation binding (GO:0043169);;	K09503|0|osa:4333580|dnaJ protein homolog	Protein processing in endoplasmic reticulum (ko04141)	dnaJ protein homolog [Oryza sativa Japonica Group]
Os01g0223200	0.0135513	-1.6915	Molecular Function: hydrolase activity (GO:0016787);;	--	--	GDSL esterase/lipase At5g45910 [Oryza sativa Japonica Group]
Os05g0295200	0.29974	1.11786	Cellular Component: intrinsic component of membrane (GO:0031224);;	K07052|2.46654e-62|osa:9270759|uncharacterized protein LOC9270759 isoform X1	--	uncharacterized protein LOC9270759 isoform X2 [Oryza sativa Japonica Group]
Os03g0254200	0.0103016	-1.94218	Biological Process: amino acid transport (GO:0006865);; Cellular Component: intrinsic component of membrane (GO:0031224);; Cellular Component: intracellular membrane-bounded organelle (GO:0043231);;	--	--	Os03g0254200, partial [Oryza sativa Japonica Group]
Os06g0474800	0.481715	1.09269	--	--	--	hypothetical protein OsI_22964 [Oryza sativa Indica Group]
Os06g0308100	0.250439	0.849899	--	--	--	Os06g0308100 [Oryza sativa Japonica Group]
Os03g0788200	0.00441103	1.52066	--	--	--	MD-2-related lipid-recognition protein ROSY1 [Oryza sativa Japonica Group]
Os07g0522600	0.375829	-0.786322	Biological Process: transport (GO:0006810);; Biological Process: glutamate receptor signaling pathway (GO:0007215);; Molecular Function: glutamate receptor activity (GO:0008066);; Cellular Component: intrinsic component of membrane (GO:0031224);;	K05387|0|osa:4343413|glutamate receptor 3.4	--	glutamate receptor 3.4 [Oryza sativa Japonica Group]
Os04g0527400	0.2987	1.31372	--	--	--	uncharacterized protein LOC4336460 [Oryza sativa Japonica Group]
Os01g0121800	0.213481	0.87477	Molecular Function: UDP-glycosyltransferase activity (GO:0008194);;	--	--	beta-glucuronosyltransferase GlcAT14A [Oryza sativa Japonica Group]
Os02g0823600	0.860127	0.108411	--	--	--	uncharacterized protein LOC4331199 [Oryza sativa Japonica Group]
Os08g0338700	0.614094	0.377189	Biological Process: cellular process (GO:0009987);; Molecular Function: adenyl nucleotide binding (GO:0030554);; Cellular Component: intrinsic component of membrane (GO:0031224);; Cellular Component: mitochondrial part (GO:0044429);; Molecular Function: protein dimerization activity (GO:0046983);; Biological Process: regulation of molecular function (GO:0065009);;	--	--	grpE protein homolog 2, mitochondrial isoform X2 [Oryza sativa Japonica Group]
xxx_newGene_11591	0.0052635	3.72215	--	--	--	LOW QUALITY PROTEIN: uncharacterized protein LOC112489936 [Ziziphus jujuba]
Os03g0284900	0.443738	-0.537096	Cellular Component: intracellular membrane-bounded organelle (GO:0043231);;	--	--	pentatricopeptide repeat-containing protein At5g02830, chloroplastic [Oryza sativa Japonica Group]
Os08g0135600	0.387643	0.711522	--	--	--	Os08g0135600 [Oryza sativa Japonica Group]
Os05g0171200	7.04214e-08	5.73468	Cellular Component: intrinsic component of membrane (GO:0031224);;	--	--	hypothetical protein OsJ_17291 [Oryza sativa Japonica Group]
Os09g0440700	0.475938	0.508612	Biological Process: response to acid chemical (GO:0001101);; Cellular Component: endosome (GO:0005768);; Cellular Component: cell-cell junction (GO:0005911);; Biological Process: copper ion transport (GO:0006825);; Cellular Component: intrinsic component of membrane (GO:0031224);; Cellular Component: vacuolar part (GO:0044437);; Molecular Function: transition metal ion transmembrane transporter a…	K14686|1.29931e-51|osa:4347173|copper transporter 5.1	--	hypothetical protein OsJ_29521 [Oryza sativa Japonica Group]
Os10g0470700	0.951167	0.0759471	Biological Process: peptide transport (GO:0015833);; Cellular Component: intrinsic component of membrane (GO:0031224);;	--	--	protein NRT1/ PTR FAMILY 5.2 [Oryza sativa Japonica Group]
Os06g0214800	0.0452712	-1.28827	Molecular Function: catalytic activity (GO:0003824);;	--	--	2-hydroxyisoflavanone dehydratase [Oryza sativa Japonica Group]
Os07g0694000	0.469648	0.372237	--	K05857|0|osa:4344391|phosphoinositide phospholipase C 2	Inositol phosphate metabolism (ko00562);; Phosphatidylinositol signaling system (ko04070)	phosphoinositide phospholipase C 2 [Oryza sativa Japonica Group]
Os08g0462900	0.502857	0.849964	Cellular Component: intrinsic component of membrane (GO:0031224);;	--	--	transmembrane protein 45B [Oryza sativa Japonica Group]
Os08g0556400	0.0469778	-1.3666	Biological Process: organelle organization (GO:0006996);; Molecular Function: palmitoyltransferase activity (GO:0016409);; Cellular Component: intrinsic component of membrane (GO:0031224);; Molecular Function: purine ribonucleoside binding (GO:0032550);; Cellular Component: microbody (GO:0042579);; Molecular Function: transition metal ion binding (GO:0046914);;	K20027|0|osa:4346287|probable protein S-acyltransferase 19	--	hypothetical protein OsI_30227 [Oryza sativa Indica Group]
Os03g0100400	0.325158	0.442512	--	K10848|0|osa:4331279|DNA repair endonuclease UVH1	Nucleotide excision repair (ko03420)	DNA repair endonuclease UVH1 [Oryza sativa Japonica Group]
Os10g0542400	0.0133536	4.12237	--	--	--	expansin-like A2 isoform X1 [Oryza sativa Japonica Group]
Os10g0530500	0.000160607	-2.59025	--	K00799|1.00362e-117|osa:4349203|probable glutathione S-transferase GSTU6	Glutathione metabolism (ko00480)	probable glutathione S-transferase GSTU6 [Oryza sativa Japonica Group]
Os09g0453000	0.228392	-0.648292	Cellular Component: intrinsic component of membrane (GO:0031224);;	--	--	transmembrane protein 50 homolog [Oryza sativa Japonica Group]
Os08g0178800	0.00137488	-1.97654	Cellular Component: cell part (GO:0044464);; Molecular Function: transition metal ion binding (GO:0046914);;	--	--	protein no-on-transient A [Oryza sativa Japonica Group]
xxx_newGene_1956	0.749985	-0.356627	Cellular Component: intrinsic component of membrane (GO:0031224);;	--	--	Os02g0155750 [Oryza sativa Japonica Group]
Os03g0294200	0.0158558	-1.04564	Molecular Function: phosphofructokinase activity (GO:0008443);; Biological Process: phosphorylation (GO:0016310);; Biological Process: hexose metabolic process (GO:0019318);; Molecular Function: polysaccharide binding (GO:0030247);; Molecular Function: purine ribonucleoside binding (GO:0032550);;	--	--	6-phosphofructo-2-kinase/fructose-2,6-bisphosphatase isoform X3 [Oryza sativa Japonica Group]
Os08g0512900	0.921771	0.070271	Cellular Component: intrinsic component of membrane (GO:0031224);; Cellular Component: intracellular membrane-bounded organelle (GO:0043231);;	--	--	uncharacterized protein LOC4346018 [Oryza sativa Japonica Group]
Os05g0366600	0.026273	-0.946954	--	K01188|0|osa:4338560|beta-glucosidase 22	Cyanoamino acid metabolism (ko00460);; Starch and sucrose metabolism (ko00500);; Phenylpropanoid biosynthesis (ko00940)	beta-glucosidase 22 [Oryza sativa Japonica Group]
Os02g0761400	0.19038	0.830995	Biological Process: protein metabolic process (GO:0019538);; Molecular Function: cation binding (GO:0043169);; Cellular Component: intracellular membrane-bounded organelle (GO:0043231);;	--	--	Os02g0761400, partial [Oryza sativa Japonica Group]
Os07g0569166	0.468294	0.476128	--	--	--	remorin 4.1 [Oryza sativa Japonica Group]
Os03g0829200	0.0588137	3.10591	--	--	--	Os03g0829200 [Oryza sativa Japonica Group]
Os11g0591200	0.521788	0.427923	Biological Process: fatty acid metabolic process (GO:0006631);; Molecular Function: transferase activity, transferring acyl groups (GO:0016746);; Cellular Component: intrinsic component of membrane (GO:0031224);; Cellular Component: intracellular membrane-bounded organelle (GO:0043231);;	K15397|0|osa:4350817|3-ketoacyl-CoA synthase 20	Fatty acid elongation (ko00062);; Plant-pathogen interaction (ko04626)	hypothetical protein OsJ_34491 [Oryza sativa Japonica Group]
Os02g0121100	0.438013	0.548049	Molecular Function: nucleic acid binding (GO:0003676);; Biological Process: transcription, DNA-templated (GO:0006351);; Molecular Function: transition metal ion binding (GO:0046914);;	K09250|2.00839e-97|osa:4328119|glycine-rich protein 2	--	glycine-rich protein 2 [Oryza sativa Japonica Group]
Os11g0551800	0.423064	-0.340916	--	--	--	PREDICTED: protein yippee-like At4g27745 [Oryza brachyantha]
Os03g0606100	0.777798	0.435222	Cellular Component: intrinsic component of membrane (GO:0031224);;	--	--	uncharacterized protein LOC4333415 [Oryza sativa Japonica Group]
Os08g0510800	0.129111	-2.41249	--	--	--	uncharacterized protein LOC4346004 [Oryza sativa Japonica Group]
Os01g0952600	0.0979477	0.972083	--	K01190|0|osa:4325748|beta-galactosidase	Galactose metabolism (ko00052);; Other glycan degradation (ko00511);; Sphingolipid metabolism (ko00600)	uncharacterized protein LOC4325748 [Oryza sativa Japonica Group]
Os07g0669250	0.00020708	2.73072	Cellular Component: plastid (GO:0009536);; Biological Process: plastid organization (GO:0009657);; Molecular Function: nucleoside-triphosphatase activity (GO:0017111);; Molecular Function: purine ribonucleoside binding (GO:0032550);; Molecular Function: metal ion binding (GO:0046872);;	--	--	Os07g0669250 [Oryza sativa Japonica Group]
Os02g0156100	0.0909022	1.80664	Cellular Component: intrinsic component of membrane (GO:0031224);;	--	--	hypothetical protein OsI_05913 [Oryza sativa Indica Group]
Os10g0487600	0.669164	-0.258367	--	--	--	uncharacterized protein LOC4348954 [Oryza sativa Japonica Group]
BAC19894	0.859755	0.134607	Cellular Component: intrinsic component of membrane (GO:0031224);; Cellular Component: intracellular membrane-bounded organelle (GO:0043231);;	--	--	cytochrome c biogenesis Fc (mitochondrion) [Oryza sativa Indica Group]
Os07g0695400	0.230144	1.90708	--	--	--	protein NETWORKED 2A isoform X2 [Oryza sativa Japonica Group]
Os10g0178200	0.25783	0.78979	Cellular Component: intrinsic component of membrane (GO:0031224);;	--	--	uncharacterized protein LOC4348199 [Oryza sativa Japonica Group]
Os03g0182400	0.431441	0.484533	Biological Process: phosphatidylinositol biosynthetic process (GO:0006661);; Biological Process: organelle organization (GO:0006996);; Molecular Function: hydrolase activity, acting on ester bonds (GO:0016788);;	--	--	phosphoinositide phosphatase SAC2 isoform X3 [Oryza sativa Japonica Group]
Os07g0111700	0.000659336	-2.67075	--	--	--	flavin-containing monooxygenase FMO GS-OX-like 8 [Oryza sativa Japonica Group]
Os09g0439500	0.0712938	1.53856	Biological Process: cellular protein modification process (GO:0006464);; Cellular Component: photosystem (GO:0009521);; Cellular Component: chloroplast thylakoid (GO:0009534);; Biological Process: photosynthesis, light harvesting (GO:0009765);; Cellular Component: intrinsic component of membrane (GO:0031224);; Molecular Function: cation binding (GO:0043169);; Molecular Function: tetrapyrrole bind…	K08908|0|osa:4347166|chlorophyll a-b binding protein, chloroplastic	Photosynthesis - antenna proteins (ko00196)	photosystem I chlorophyll a/b-binding protein 6, chloroplastic [Oryza sativa Japonica Group]
Os11g0648100	0.0036395	-1.11474	--	--	--	Kinesin motor domain containing protein, expressed [Oryza sativa Japonica Group]
Os10g0466700	0.0610394	0.985864	--	--	--	Os03g0139100, partial [Oryza sativa Japonica Group]
Os04g0419900	2.70836e-13	-3.36335	--	--	--	Os04g0419900, partial [Oryza sativa Japonica Group]
Os09g0426100	0.329079	1.6673	--	--	--	WAT1-related protein At4g30420 isoform X2 [Oryza sativa Japonica Group]
Os05g0145000	0.560077	0.332182	Biological Process: carbohydrate mediated signaling (GO:0009756);; Molecular Function: ubiquitin-like protein transferase activity (GO:0019787);; Cellular Component: intrinsic component of membrane (GO:0031224);; Biological Process: protein modification by small protein conjugation (GO:0032446);; Molecular Function: transition metal ion binding (GO:0046914);;	K16284|0|osa:4337790|E3 ubiquitin-protein ligase SIS3	--	hypothetical protein EE612_027061 [Oryza sativa]
Os01g0672500	0.151752	1.72464	Biological Process: (1->3)-beta-D-glucan metabolic process (GO:0006074);; Cellular Component: intrinsic component of membrane (GO:0031224);; Molecular Function: UDP-glucosyltransferase activity (GO:0035251);; Cellular Component: plasma membrane part (GO:0044459);;	K11000|0|osa:4325900|callose synthase 12	--	callose synthase 12 [Oryza sativa Japonica Group]
Os04g0490600	0.555985	0.501036	Molecular Function: cation:sugar symporter activity (GO:0005402);; Biological Process: hydrogen transport (GO:0006818);; Cellular Component: intrinsic component of membrane (GO:0031224);; Cellular Component: Golgi apparatus part (GO:0044431);;	--	--	Os04g0490600 [Oryza sativa Japonica Group]
Os03g0333800	0.158999	-1.24567	Molecular Function: methyltransferase activity (GO:0008168);;	K04688|0|osa:4332748|uncharacterized protein LOC4332748	--	uncharacterized protein LOC4332748 [Oryza sativa Japonica Group]
Os12g0528400	0.0281795	-0.903288	Biological Process: glutathione metabolic process (GO:0006749);; Molecular Function: acid-amino acid ligase activity (GO:0016881);; Molecular Function: purine ribonucleoside binding (GO:0032550);; Molecular Function: anion binding (GO:0043168);; Molecular Function: metal ion binding (GO:0046872);; Molecular Function: protein dimerization activity (GO:0046983);;	K21456|6.93641e-165|osa:9272324|glutathione synthetase, chloroplastic isoform X1	Cysteine and methionine metabolism (ko00270);; Glutathione metabolism (ko00480);; Biosynthesis of cofactors (ko01240)	glutathione synthetase, chloroplastic isoform X2 [Oryza sativa Japonica Group]
Os03g0804500	0.0161899	-1.58648	--	--	--	germin-like protein 3-7 [Oryza sativa Japonica Group]
Os08g0159100	0.298365	1.00632	--	--	--	tobamovirus multiplication protein 2A [Oryza sativa Japonica Group]
Os01g0892300	0.188744	-1.40612	Biological Process: cellular protein modification process (GO:0006464);; Molecular Function: kinase activity (GO:0016301);; Cellular Component: intrinsic component of membrane (GO:0031224);; Molecular Function: purine ribonucleoside binding (GO:0032550);;	--	--	probably inactive leucine-rich repeat receptor-like protein kinase At5g48380 isoform X1 [Oryza sativa Japonica Group]
Os07g0134800	0.397779	0.561058	Molecular Function: succinate dehydrogenase activity (GO:0000104);; Molecular Function: nucleotide binding (GO:0000166);; Cellular Component: mitochondrion (GO:0005739);; Biological Process: citrate metabolic process (GO:0006101);; Cellular Component: organelle inner membrane (GO:0019866);; Biological Process: respiratory electron transport chain (GO:0022904);;	K00234|0|osa:4342350|succinate dehydrogenase [ubiquinone] flavoprotein subunit, mitochondrial	Citrate cycle (TCA cycle) (ko00020);; Oxidative phosphorylation (ko00190);; Carbon metabolism (ko01200)	succinate dehydrogenase [ubiquinone] flavoprotein subunit, mitochondrial [Oryza sativa Japonica Group]
Os07g0689600	0.407812	1.1193	--	K05953|0|osa:4344361|nicotianamine synthase 3	--	nicotianamine synthase 3 [Oryza sativa Japonica Group]
Os07g0139400	0.245458	0.670281	--	K12448|0|osa:4342364|probable UDP-arabinose 4-epimerase 1	Amino sugar and nucleotide sugar metabolism (ko00520)	probable UDP-arabinose 4-epimerase 1 [Oryza sativa Japonica Group]
Os01g0615250	0.442163	0.919948	Molecular Function: transferase activity, transferring acyl groups (GO:0016746);;	--	--	acyl transferase 5-like [Oryza sativa Japonica Group]
Os01g0292200	0.684595	0.337904	--	K07198|0|osa:4325161|CBL-interacting protein kinase 1	--	CBL-interacting protein kinase 1 [Oryza sativa Japonica Group]
Os05g0524200	0.109345	1.72923	--	--	--	putative dual specificity protein phosphatase DSP8 [Oryza sativa Japonica Group]
Os02g0818000	0.18522	1.49094	--	--	--	Os02g0818000, partial [Oryza sativa Japonica Group]
Os02g0604100	0.73124	0.305991	--	--	--	uncharacterized protein LOC4329913 [Oryza sativa Japonica Group]
Os05g0564800	0.338524	0.721565	--	--	--	Os05g0564800, partial [Oryza sativa Japonica Group]
Os05g0539700	0.561795	0.415807	Biological Process: nucleosome organization (GO:0034728);; Cellular Component: intracellular membrane-bounded organelle (GO:0043231);;	K11279|0|osa:4339460|nucleosome assembly protein 1;2	--	nucleosome assembly protein 1;2 [Oryza sativa Japonica Group]
Os07g0222300	0.0576545	0.800968	--	K03250|0|osa:4342741|eukaryotic translation initiation factor 3 subunit E	RNA transport (ko03013)	eukaryotic translation initiation factor 3 subunit E [Oryza sativa Japonica Group]
Os03g0170500	0.192981	-1.07078	Cellular Component: chloroplast thylakoid (GO:0009534);; Cellular Component: intrinsic component of membrane (GO:0031224);;	--	--	uncharacterized protein LOC4331773 [Oryza sativa Japonica Group]
Os09g0380000	0.017659	1.16606	--	--	--	acyl-activating enzyme 17-like protein [Oryza sativa Japonica Group]
Os10g0456900	0.284243	0.585177	Molecular Function: nucleoside-triphosphatase activity (GO:0017111);; Biological Process: ribonucleoprotein complex assembly (GO:0022618);; Molecular Function: purine ribonucleoside binding (GO:0032550);; Cellular Component: intracellular membrane-bounded organelle (GO:0043231);;	--	--	Os10g0456900, partial [Oryza sativa Japonica Group]
Os01g0367300	0.819121	0.104047	Molecular Function: catalytic activity (GO:0003824);; Molecular Function: small molecule binding (GO:0036094);; Molecular Function: organic cyclic compound binding (GO:0097159);;	--	--	serine/arginine repetitive matrix protein 5 isoform X2 [Oryza sativa Japonica Group]
Os04g0465700	0.479039	0.434742	Molecular Function: nucleic acid binding (GO:0003676);; Biological Process: gene silencing (GO:0016458);; Molecular Function: 5'-3' RNA polymerase activity (GO:0034062);; Molecular Function: small molecule binding (GO:0036094);; Biological Process: nucleic acid-templated transcription (GO:0097659);;	K11699|0|osa:4336092|probable RNA-dependent RNA polymerase 2	--	probable RNA-dependent RNA polymerase 2 [Oryza sativa Japonica Group]
Os02g0641300	0.0854192	2.27443	Molecular Function: nucleic acid binding (GO:0003676);;	K09422|2.05758e-120|osa:4330115|transcription factor MYB21	--	transcription factor MYB21 [Oryza sativa Japonica Group]
Os05g0405000	0.00114464	-1.61597	Biological Process: starch metabolic process (GO:0005982);; Biological Process: lipid metabolic process (GO:0006629);; Biological Process: phosphate-containing compound metabolic process (GO:0006796);; Biological Process: response to radiation (GO:0009314);; Cellular Component: plastid (GO:0009536);; Molecular Function: phosphotransferase activity, paired acceptors (GO:0016781);; Molecular Functi…	K01006|0|osa:4338750|pyruvate, phosphate dikinase 1, chloroplastic isoform X1	Glycolysis / Gluconeogenesis (ko00010);; Pyruvate metabolism (ko00620);; Carbon fixation in photosynthetic organisms (ko00710);; Carbon metabolism (ko01200)	pyruvate, phosphate dikinase 1, chloroplastic [Oryza sativa Japonica Group]
Os05g0451900	0.775717	0.159153	--	--	--	O-fucosyltransferase 19 [Oryza sativa Japonica Group]
Os06g0116800	0.391869	0.414825	--	K03686|0|osa:4339933|chaperone protein DnaJ	--	chaperone protein dnaJ GFA2, mitochondrial [Oryza sativa Japonica Group]
Os06g0698802	0.0256956	1.96241	Molecular Function: purine ribonucleoside binding (GO:0032550);; Molecular Function: cation binding (GO:0043169);;	--	--	Os06g0698802, partial [Oryza sativa Japonica Group]
Os06g0623600	0.0682903	1.64046	Molecular Function: cofactor binding (GO:0048037);;	--	--	cinnamoyl-CoA reductase 1 isoform X1 [Oryza sativa Japonica Group]
Os05g0415200	0.38125	-0.484848	Biological Process: response to inorganic substance (GO:0010035);; Molecular Function: transferase activity, transferring amino-acyl groups (GO:0016755);; Biological Process: peptide biosynthetic process (GO:0043043);; Molecular Function: cation binding (GO:0043169);;	K05941|0|obr:102706657|glutathione gamma-glutamylcysteinyltransferase 1-like	--	phytochelatin synthase [Oryza sativa]
Os01g0662300	0.628574	0.475905	Molecular Function: structural molecule activity (GO:0005198);; Cellular Component: plastid (GO:0009536);; Biological Process: gene expression (GO:0010467);; Cellular Component: intracellular ribonucleoprotein complex (GO:0030529);;	--	--	unknown protein [Oryza sativa Japonica Group]
Os10g0478400	0.705368	0.257273	Cellular Component: intrinsic component of membrane (GO:0031224);; Cellular Component: intracellular membrane-bounded organelle (GO:0043231);;	--	--	uncharacterized protein LOC4348907 [Oryza sativa Japonica Group]
Os12g0182600	0.423026	0.512146	--	--	--	cx9C motif-containing protein 4 [Oryza sativa Japonica Group]
Os05g0556700	0.0799302	1.5003	Molecular Function: protein binding (GO:0005515);; Cellular Component: cytoplasm (GO:0005737);; Cellular Component: plasma membrane (GO:0005886);; Biological Process: cellular process (GO:0009987);; Cellular Component: external encapsulating structure (GO:0030312);; Molecular Function: purine ribonucleoside binding (GO:0032550);;	K09494|0|osa:4339570|T-complex protein 1 subunit beta	--	T-complex protein 1 subunit beta [Oryza sativa Japonica Group]
Os08g0117300	0.00294807	1.09449	--	K02953|1.65996e-102|osa:4344524|40S ribosomal protein S13-2	Ribosome (ko03010)	40S ribosomal protein S13-2 [Oryza sativa Japonica Group]
Os01g0804400	0.019666	-1.50528	Molecular Function: oxidoreductase activity (GO:0016491);; Cellular Component: intrinsic component of membrane (GO:0031224);; Biological Process: single-organism metabolic process (GO:0044710);; Molecular Function: tetrapyrrole binding (GO:0046906);; Molecular Function: transition metal ion binding (GO:0046914);;	--	--	cytochrome P450 94B3 [Oryza sativa Japonica Group]
Os03g0685300	0.548121	0.38454	--	K22314|3.81985e-172|osa:4333748|putative glutamine amidotransferase-like protein C13C5.04	--	gamma-glutamyl peptidase 3 [Oryza sativa Japonica Group]
Os06g0153600	0.361616	0.739123	--	--	--	hypothetical protein OsJ_20166 [Oryza sativa Japonica Group]
Os03g0379400	0.721719	0.271637	Cellular Component: intracellular membrane-bounded organelle (GO:0043231);;	--	--	uncharacterized protein LOC4332973 [Oryza sativa Japonica Group]
Os08g0492100	0.451927	0.720475	Biological Process: transport (GO:0006810);; Cellular Component: intrinsic component of membrane (GO:0031224);; Molecular Function: small molecule binding (GO:0036094);; Molecular Function: organic cyclic compound binding (GO:0097159);;	--	--	unnamed protein product [Oryza sativa Japonica Group]
Os10g0522601	0.198774	-0.955291	--	--	--	hypothetical protein OsJ_32200 [Oryza sativa Japonica Group]
Os10g0209700	0.0844952	-1.04466	--	--	--	heavy metal-associated isoprenylated plant protein 7 isoform X1 [Oryza sativa Japonica Group]
Os05g0537100	0.779777	0.514584	Molecular Function: nucleic acid binding transcription factor activity (GO:0001071);; Molecular Function: DNA binding (GO:0003677);; Biological Process: transcription, DNA-templated (GO:0006351);; Cellular Component: intracellular membrane-bounded organelle (GO:0043231);;	--	--	hypothetical protein OsI_20783 [Oryza sativa Indica Group]
Os05g0418100	0.588948	0.535634	--	K08472|0|osa:9268698|MLO-like protein 1 isoform X1	--	MLO-like protein 1 isoform X1 [Oryza sativa Japonica Group]
Os01g0773000	0.013197	1.75824	Molecular Function: nucleic acid binding (GO:0003676);; Biological Process: RNA modification (GO:0009451);; Molecular Function: intramolecular transferase activity (GO:0016866);; Cellular Component: intracellular membrane-bounded organelle (GO:0043231);;	K06176|0|osa:4324714|pseudouridylate synthase 7 homolog isoform X1	--	pseudouridylate synthase 7 homolog isoform X2 [Oryza sativa Japonica Group]
Os03g0654400	0.0554723	0.709127	--	K13863|0|osa:4333602|uncharacterized protein LOC4333602	--	uncharacterized protein LOC4333602 [Oryza sativa Japonica Group]
Os12g0239000	0.561132	0.414395	--	--	--	uncharacterized protein LOC4351860 [Oryza sativa Japonica Group]
Os03g0146000	0.00552579	1.72375	Molecular Function: purine ribonucleoside binding (GO:0032550);; Biological Process: intracellular signal transduction (GO:0035556);; Cellular Component: cell part (GO:0044464);;	K07910|2.66288e-143|osa:4331607|ras-related protein RABC2a	--	ras-related protein RABC2a [Oryza sativa Japonica Group]
Os01g0679000	0.624412	0.416547	--	K03023|0|osa:4325277|uncharacterized protein LOC4325277 isoform X1	RNA polymerase (ko03020)	uncharacterized protein LOC4325277 isoform X1 [Oryza sativa Japonica Group]
Os01g0727820	0.069902	1.64848	Molecular Function: endopeptidase activity (GO:0004175);; Biological Process: protein metabolic process (GO:0019538);;	--	--	subtilisin-like protease SBT5.6 [Oryza sativa Japonica Group]
Os01g0167700	0.527623	0.581337	Cellular Component: intrinsic component of membrane (GO:0031224);; Cellular Component: intracellular membrane-bounded organelle (GO:0043231);;	--	--	Os01g0167700 [Oryza sativa Japonica Group]
Os03g0132000	0.113167	1.14757	Molecular Function: catalytic activity (GO:0003824);; Cellular Component: intrinsic component of membrane (GO:0031224);; Molecular Function: purine ribonucleoside binding (GO:0032550);;	K10526|0|osa:4331515|4-coumarate--CoA ligase-like 4	alpha-Linolenic acid metabolism (ko00592)	4-coumarate--CoA ligase-like 4 [Oryza sativa Japonica Group]
Os12g0563000	0.0787878	2.49426	--	--	--	probable glycerol-3-phosphate acyltransferase 3 [Oryza sativa Japonica Group]
Os06g0483200	0.161193	-1.97405	--	K19011|0|obr:102703694|achilleol B synthase-like	Sesquiterpenoid and triterpenoid biosynthesis (ko00909)	Os06g0483200, partial [Oryza sativa Japonica Group]
Os07g0585500	0.487064	0.880634	--	--	--	Os07g0585500, partial [Oryza sativa Japonica Group]
Os08g0532400	0.759802	0.354527	Cellular Component: intrinsic component of membrane (GO:0031224);; Cellular Component: intracellular membrane-bounded organelle (GO:0043231);;	--	--	protein NUCLEAR FUSION DEFECTIVE 4 [Oryza sativa Japonica Group]
Os07g0232900	0.922286	-0.0878513	--	K01534|0|osa:4342783|putative inactive cadmium/zinc-transporting ATPase HMA3	--	cadmium/zinc-transporting ATPase HMA3-like [Oryza sativa Japonica Group]
Os03g0370250	0.19762	1.18164	--	--	--	Os03g0370250, partial [Oryza sativa Japonica Group]
Os03g0413100	1.02963e-05	-2.02518	Molecular Function: carboxylic acid binding (GO:0031406);;	--	--	ACT domain-containing protein ACR4 [Oryza sativa Japonica Group]
Os04g0428950	0.0702396	1.02284	Molecular Function: organic cyclic compound binding (GO:0097159);;	K14525|2.34629e-126|osa:9269193|ribonuclease P protein subunit p25	Ribosome biogenesis in eukaryotes (ko03008);; RNA transport (ko03013)	ribonuclease P protein subunit p25 isoform X2 [Oryza sativa Japonica Group]
Os03g0143700	0.0209953	-1.02971	--	--	--	uncharacterized protein LOC4331592 [Oryza sativa Japonica Group]
Os01g0269100	0.291597	0.564805	Molecular Function: catalytic activity (GO:0003824);; Cellular Component: cytoplasm (GO:0005737);; Molecular Function: Ras GTPase binding (GO:0017016);; Molecular Function: GTPase regulator activity (GO:0030695);; Biological Process: positive regulation of protein modification process (GO:0031401);; Biological Process: intracellular signal transduction (GO:0035556);; Biological Process: single-or…	K23460|0|osa:4326267|rab proteins geranylgeranyltransferase component A 2	--	rab escort protein 1 [Oryza sativa Japonica Group]
Os04g0578300	0.152276	-1.48019	Cellular Component: microtubule cytoskeleton (GO:0015630);;	K18635|6.94108e-73|osa:107277599|protein SPIRAL1-like 4	--	RecName: Full=Protein SPIRAL1-like 4
Os02g0137400	0.637906	0.237657	--	K12830|0|osa:4328237|splicing factor 3B subunit 3	Spliceosome (ko03040)	spliceosome-associated protein 130 A [Oryza sativa Japonica Group]
Os03g0814800	0.488909	0.678869	Cellular Component: intracellular membrane-bounded organelle (GO:0043231);;	--	--	Os03g0814800 [Oryza sativa Japonica Group]
Os03g0278800	0.468753	-0.547941	Molecular Function: small molecule binding (GO:0036094);; Cellular Component: intracellular membrane-bounded organelle (GO:0043231);; Molecular Function: organic cyclic compound binding (GO:0097159);;	--	--	organelle RRM domain-containing protein 2, mitochondrial isoform X1 [Oryza sativa Japonica Group]
Os07g0181000	0.086622	1.5373	Biological Process: developmental process involved in reproduction (GO:0003006);; Biological Process: pyruvate metabolic process (GO:0006090);; Biological Process: phosphate-containing compound metabolic process (GO:0006796);; Cellular Component: plastid stroma (GO:0009532);; Molecular Function: phosphotransferase activity, alcohol group as acceptor (GO:0016773);; Molecular Function: alkali metal…	--	--	Os07g0181000, partial [Oryza sativa Japonica Group]
Os10g0556500	0.819603	0.25227	--	--	--	Os10g0556500, partial [Oryza sativa Japonica Group]
Os01g0953100	0.0720367	-1.24532	--	--	--	uncharacterized protein LOC4325753 [Oryza sativa Japonica Group]
Os12g0586300	0.159963	-0.983838	Molecular Function: nucleic acid binding (GO:0003676);; Biological Process: transcription, DNA-templated (GO:0006351);; Cellular Component: intracellular membrane-bounded organelle (GO:0043231);;	--	--	transcription factor HHO6 [Oryza sativa Japonica Group]
Os05g0182000	0.290256	0.793663	Cellular Component: intracellular membrane-bounded organelle (GO:0043231);;	--	--	uncharacterized protein LOC9268468 [Oryza sativa Japonica Group]
Os04g0390000	0.458764	0.550116	--	K00164|0|osa:4335673|2-oxoglutarate dehydrogenase, mitochondrial	Citrate cycle (TCA cycle) (ko00020);; Carbon metabolism (ko01200)	OSIGBa0096P03.7 [Oryza sativa]
Os03g0194100	0.0597149	1.89046	--	--	--	uncharacterized protein LOC4331924 [Oryza sativa Japonica Group]
Os04g0412100	0.0239736	-1.91296	--	--	--	uncharacterized protein LOC4335778 [Oryza sativa Japonica Group]
Os12g0624000	0.762434	0.148594	--	K00549|0|osa:4352833|5-methyltetrahydropteroyltriglutamate-- homocysteine methyltransferase 2	Cysteine and methionine metabolism (ko00270);; Selenocompound metabolism (ko00450);; Biosynthesis of amino acids (ko01230)	5-methyltetrahydropteroyltriglutamate--homocysteine methyltransferase 2 [Oryza sativa Japonica Group]
Os03g0649000	0.162219	-0.66451	Molecular Function: disulfide oxidoreductase activity (GO:0015036);; Biological Process: cellular homeostasis (GO:0019725);; Cellular Component: intracellular membrane-bounded organelle (GO:0043231);; Biological Process: single-organism metabolic process (GO:0044710);;	--	--	uncharacterized protein LOC4333583 [Oryza sativa Japonica Group]
Os01g0236000	0.299091	-0.696181	Cellular Component: intrinsic component of membrane (GO:0031224);;	--	--	uncharacterized protein LOC4327784 [Oryza sativa Japonica Group]
Os07g0246200	0.0803534	1.10756	Molecular Function: protein binding (GO:0005515);; Cellular Component: endoplasmic reticulum (GO:0005783);; Biological Process: cellular calcium ion homeostasis (GO:0006874);; Biological Process: single-multicellular organism process (GO:0044707);; Molecular Function: metal ion binding (GO:0046872);;	K08057|0|osa:4342826|calreticulin isoform X2	Protein processing in endoplasmic reticulum (ko04141);; Phagosome (ko04145)	calreticulin isoform X2 [Oryza sativa Japonica Group]
Os02g0764400	0.859614	0.283472	--	K13681|0|osa:4330827|galactoside 2-alpha-L-fucosyltransferase	--	galactoside 2-alpha-L-fucosyltransferase [Oryza sativa Japonica Group]
Os06g0632700	0.623043	0.281203	Molecular Function: transition metal ion binding (GO:0046914);;	--	--	uncharacterized protein LOC4341585 [Oryza sativa Japonica Group]
Os07g0646300	0.991586	0.00732082	--	--	--	uncharacterized protein LOC112939663 [Oryza sativa Japonica Group]
Os03g0747900	0.820705	0.189983	Biological Process: sulfur amino acid biosynthetic process (GO:0000097);; Biological Process: L-serine metabolic process (GO:0006563);; Molecular Function: cytoskeletal protein binding (GO:0008092);; Cellular Component: actin cytoskeleton (GO:0015629);; Molecular Function: carbon-oxygen lyase activity (GO:0016835);; Molecular Function: nucleoside-triphosphatase activity (GO:0017111);; Molecular F…	--	--	Os03g0747900, partial [Oryza sativa Japonica Group]
Os07g0120650	7.8916e-06	5.80866	--	--	--	uncharacterized protein LOC9268981 [Oryza sativa Japonica Group]
Os11g0683500	0.098093	0.877183	Molecular Function: hydrolase activity, hydrolyzing O-glycosyl compounds (GO:0004553);; Cellular Component: plastid outer membrane (GO:0009527);; Biological Process: primary metabolic process (GO:0044238);;	K21362|0|osa:4351127|beta-glucosidase-like SFR2, chloroplastic	Glycerolipid metabolism (ko00561)	beta-glucosidase-like SFR2, chloroplastic [Oryza sativa Japonica Group]
Os09g0482680	0.0304445	1.13912	--	K00784|0|osa:9269203|ribonuclease Z, chloroplastic	RNA transport (ko03013)	tRNase Z TRZ2, chloroplastic [Oryza sativa Japonica Group]
Os12g0554400	0.683575	0.257763	--	K20307|0|osa:4352484|trafficking protein particle complex II-specific subunit 130 homolog isoform X1	--	trafficking protein particle complex II-specific subunit 130 homolog isoform X1 [Oryza sativa Japonica Group]
Os04g0679400	2.07466e-08	2.94655	--	--	--	Os04g0679400 [Oryza sativa Japonica Group]
Os06g0573600	0.0379241	-3.26595	--	--	--	beta-galactosidase 9 [Oryza sativa Japonica Group]
Os04g0689500	0.0210729	-2.77797	Molecular Function: protein kinase activity (GO:0004672);; Biological Process: cellular protein modification process (GO:0006464);; Cellular Component: intrinsic component of membrane (GO:0031224);; Molecular Function: purine ribonucleoside binding (GO:0032550);; Cellular Component: intracellular membrane-bounded organelle (GO:0043231);;	--	--	Os04g0689500, partial [Oryza sativa Japonica Group]
Os01g0932600	0.992169	-0.0082772	--	--	--	uncharacterized protein LOC4326821 isoform X2 [Oryza sativa Japonica Group]
Os12g0607000	0.199932	1.12223	Biological Process: sulfur amino acid biosynthetic process (GO:0000097);; Molecular Function: transferase activity, transferring one-carbon groups (GO:0016741);; Molecular Function: cation binding (GO:0043169);;	--	--	homocysteine S-methyltransferase 2 isoform X1 [Zea mays]
Os01g0281050	0.161782	-0.789504	Molecular Function: protein binding (GO:0005515);; Molecular Function: purine ribonucleoside binding (GO:0032550);;	--	--	Os01g0281050 [Oryza sativa Japonica Group]
Os01g0222600	5.39683e-05	2.63611	--	--	--	uncharacterized protein LOC4326700 [Oryza sativa Japonica Group]
Os07g0124600	0.121595	1.52873	Cellular Component: viral capsid (GO:0019028);; Molecular Function: small molecule binding (GO:0036094);; Cellular Component: intracellular part (GO:0044424);; Molecular Function: organic cyclic compound binding (GO:0097159);;	K14411|0|osa:4342307|RNA-binding protein Musashi homolog Rbp6	mRNA surveillance pathway (ko03015)	RNA-binding protein Musashi homolog Rbp6 [Oryza sativa Japonica Group]
Os09g0488700	0.15793	1.08874	--	--	--	uncharacterized protein LOC4347433 [Oryza sativa Japonica Group]
Os12g0225150	0.50971	0.520927	Molecular Function: nucleic acid binding (GO:0003676);; Biological Process: gene expression (GO:0010467);; Molecular Function: small molecule binding (GO:0036094);; Cellular Component: intracellular membrane-bounded organelle (GO:0043231);;	K15191|4.65211e-92|osa:9269121|la-related protein 6B	--	la-related protein 6B [Oryza sativa Japonica Group]
Os10g0136400	0.143073	-1.41097	--	--	--	Os10g0136400 [Oryza sativa Japonica Group]
Os07g0176200	0.142118	1.47349	Molecular Function: nucleic acid binding (GO:0003676);; Molecular Function: methyltransferase activity (GO:0008168);; Biological Process: RNA modification (GO:0009451);; Biological Process: gene expression (GO:0010467);;	--	--	protein tesmin/TSO1-like CXC 2 [Oryza sativa Japonica Group]
Os06g0135900	0.0565762	2.49396	Biological Process: exocytosis (GO:0006887);; Biological Process: protein localization (GO:0008104);;	--	--	Os06g0135900 [Oryza sativa Japonica Group]
Os09g0484900	0.0935894	1.77973	--	K14445|0|osa:4347418|tonoplast dicarboxylate transporter	--	tonoplast dicarboxylate transporter [Oryza sativa Japonica Group]
Os11g0162900	0.600053	0.338886	Cellular Component: intrinsic component of membrane (GO:0031224);;	--	--	uncharacterized protein LOC4349862 isoform X1 [Oryza sativa Japonica Group]
BAC19864	0.353451	-1.89938	Cellular Component: intrinsic component of membrane (GO:0031224);; Cellular Component: intracellular membrane-bounded organelle (GO:0043231);; Biological Process: cellular protein complex assembly (GO:0043623);; Biological Process: single-organism metabolic process (GO:0044710);; Molecular Function: tetrapyrrole binding (GO:0046906);; Biological Process: cofactor transport (GO:0051181);; Molecula…	--	--	orf183 (mitochondrion) [Oryza sativa Japonica Group]
Os10g0439600	0.79702	0.161571	Molecular Function: nucleic acid binding (GO:0003676);; Biological Process: RNA processing (GO:0006396);; Molecular Function: small molecule binding (GO:0036094);; Cellular Component: intracellular membrane-bounded organelle (GO:0043231);;	--	--	Os10g0439600, partial [Oryza sativa Japonica Group]
Os01g0851100	0.254233	0.803396	--	--	--	Os01g0851100 [Oryza sativa Japonica Group]
Os10g0343100	0.851025	0.215622	Cellular Component: intracellular (GO:0005622);; Biological Process: vesicle-mediated transport (GO:0016192);; Cellular Component: intrinsic component of membrane (GO:0031224);;	--	--	uncharacterized protein LOC4348362 isoform X1 [Oryza sativa Japonica Group]
Os11g0105750	0.31692	-0.837651	Cellular Component: plastid outer membrane (GO:0009527);; Biological Process: chloroplast organization (GO:0009658);; Cellular Component: intrinsic component of membrane (GO:0031224);;	--	--	protein CHUP1, chloroplastic [Oryza sativa Japonica Group]
Os07g0246600	0.209304	0.950646	Cellular Component: intracellular membrane-bounded organelle (GO:0043231);;	--	--	uncharacterized protein LOC4342828 isoform X1 [Oryza sativa Japonica Group]
Os05g0550700	0.02877	3.54168	Molecular Function: protein kinase activity (GO:0004672);; Biological Process: cellular protein modification process (GO:0006464);; Biological Process: phosphate-containing compound metabolic process (GO:0006796);; Cellular Component: intrinsic component of membrane (GO:0031224);; Molecular Function: purine ribonucleoside binding (GO:0032550);;	--	--	Os05g0550700 [Oryza sativa Japonica Group]
Os03g0622500	0.0672946	2.11752	Cellular Component: intrinsic component of membrane (GO:0031224);;	--	--	Os03g0622500 [Oryza sativa Japonica Group]
Os04g0560500	0.170486	-0.867421	Molecular Function: catalytic activity (GO:0003824);; Cellular Component: intracellular membrane-bounded organelle (GO:0043231);; Biological Process: single-organism metabolic process (GO:0044710);;	--	--	Os04g0560500 [Oryza sativa Japonica Group]
Os04g0600000	0.000218217	3.41592	--	--	--	myb family transcription factor PHL11 isoform X1 [Oryza sativa Japonica Group]
Os11g0134500	0.0976533	0.806936	--	--	--	glutamate-rich WD repeat-containing protein 1 [Oryza sativa Japonica Group]
Os09g0440300	0.000677021	3.02395	--	K14085|0|osa:4347172|aldehyde dehydrogenase family 7 member A1	Glycolysis / Gluconeogenesis (ko00010);; Ascorbate and aldarate metabolism (ko00053);; Fatty acid degradation (ko00071);; Glycine, serine and threonine metabolism (ko00260);; Valine, leucine and isoleucine degradation (ko00280);; Lysine degradation (ko00310);; Arginine and proline metabolism (ko00330);; Histidine metabolism (ko00340);; Tryptophan metabolism (ko00380);; beta-Alanine metabolism (ko…	aldehyde dehydrogenase family 7 member A1 [Oryza sativa Japonica Group]
Os09g0454900	0.0316517	2.7907	--	--	--	G-type lectin S-receptor-like serine/threonine-protein kinase At5g35370 [Oryza sativa Japonica Group]
Os09g0378300	0.623664	0.438136	--	K01869|0|osa:4346920|leucine--tRNA ligase, cytoplasmic	Aminoacyl-tRNA biosynthesis (ko00970)	leucine--tRNA ligase, cytoplasmic [Oryza sativa Japonica Group]
Os08g0558800	0.158178	0.618249	--	--	--	Os08g0558800, partial [Oryza sativa Japonica Group]
Os09g0511600	0.103665	-0.944086	--	--	--	Os09g0511600 [Oryza sativa Japonica Group]
Os10g0497800	0.540961	0.333974	Molecular Function: oxidoreductase activity (GO:0016491);; Molecular Function: vitamin binding (GO:0019842);; Cellular Component: intrinsic component of membrane (GO:0031224);; Biological Process: single-organism metabolic process (GO:0044710);; Molecular Function: transition metal ion binding (GO:0046914);;	K00472|4.8895e-161|osa:4349012|probable prolyl 4-hydroxylase 3	Arginine and proline metabolism (ko00330)	probable prolyl 4-hydroxylase 3 [Oryza sativa Japonica Group]
Os02g0510300	0.494657	0.560506	Cellular Component: intracellular membrane-bounded organelle (GO:0043231);;	--	--	basic salivary proline-rich protein 2 [Oryza sativa Japonica Group]
Os08g0160600	0.379304	-1.30883	--	K20923|0|osa:4344719|probable mixed-linked glucan synthase 6	--	probable mixed-linked glucan synthase 6 [Oryza sativa Japonica Group]
Os01g0136800	0.477393	0.44346	Molecular Function: pattern binding (GO:0001871);; Molecular Function: protein kinase activity (GO:0004672);; Biological Process: cellular protein modification process (GO:0006464);; Biological Process: phosphate-containing compound metabolic process (GO:0006796);; Cellular Component: intrinsic component of membrane (GO:0031224);; Molecular Function: purine ribonucleoside binding (GO:0032550);;	--	--	LEAF RUST 10 DISEASE-RESISTANCE LOCUS RECEPTOR-LIKE PROTEIN KINASE-like 1.2 [Oryza sativa Japonica Group]
Os01g0327400	0.0254497	3.23067	--	K00430|0|osa:4326970|peroxidase 1	Phenylpropanoid biosynthesis (ko00940)	peroxidase 1 [Oryza sativa Japonica Group]
Os05g0295900	0.476987	0.525145	--	--	--	proline-, glutamic acid- and leucine-rich protein 1 [Oryza sativa Japonica Group]
Os12g0115300	0.0194897	1.38522	Molecular Function: binding (GO:0005488);; Biological Process: lipid localization (GO:0010876);; Biological Process: establishment of localization (GO:0051234);;	--	--	non-specific lipid-transfer protein 1 [Oryza sativa Japonica Group]
Os06g0115200	0.292802	-0.544286	--	--	--	uncharacterized membrane protein At1g75140 [Oryza sativa Japonica Group]
Os12g0610500	0.912346	0.0854282	--	--	--	protein RRNAD1 [Oryza sativa Japonica Group]
Os08g0504800	0.318812	-1.13859	--	--	--	serine/threonine-protein kinase UCN [Oryza sativa Japonica Group]
Os07g0482900	0.000207698	-3.06018	--	--	--	Os07g0482975 [Oryza sativa Japonica Group]
Os03g0277300	4.20384e-10	8.84159	Molecular Function: purine ribonucleoside binding (GO:0032550);;	K03283|0|osa:4332420|heat shock cognate 70 kDa protein	Spliceosome (ko03040);; Protein processing in endoplasmic reticulum (ko04141);; Endocytosis (ko04144)	heat shock cognate 70 kDa protein [Oryza sativa Japonica Group]
Os01g0526200	0.967953	0.0310687	--	K14782|0|osa:4323936|putative uncharacterized protein DDB_G0270496	--	putative uncharacterized protein DDB_G0270496 [Oryza sativa Japonica Group]
Os02g0775600	0.00575569	-2.57956	Molecular Function: cation binding (GO:0043169);;	--	--	zinc finger protein 8 [Oryza sativa Japonica Group]
Os06g0152400	0.665276	-0.227416	--	--	--	Os06g0152400 [Oryza sativa Japonica Group]
Os06g0221200	0.162219	1.54332	Molecular Function: phospholipid binding (GO:0005543);; Molecular Function: metal ion binding (GO:0046872);;	K17098|0|osa:4340522|annexin D1	--	annexin D1 [Oryza sativa Japonica Group]
Os02g0776400	0.0191952	-1.20999	Molecular Function: nucleic acid binding transcription factor activity (GO:0001071);; Biological Process: transcription, DNA-templated (GO:0006351);;	K08064|8.94701e-142|osa:9270863|nuclear transcription factor Y subunit A-4 isoform X1	--	nuclear transcription factor Y subunit A-4 [Oryza sativa Japonica Group]
Os10g0487400	0.236288	0.848187	--	--	--	E3 ubiquitin-protein ligase RING1-like [Oryza sativa Japonica Group]
Os02g0175500	0.399322	0.608904	Molecular Function: UDP-glycosyltransferase activity (GO:0008194);; Cellular Component: intrinsic component of membrane (GO:0031224);;	--	--	uncharacterized protein LOC4328471 [Oryza sativa Japonica Group]
Os01g0770100	0.90451	0.0923881	--	--	--	Os01g0770100 [Oryza sativa Japonica Group]
Os04g0176400	0.260498	-1.47653	--	K16296|0|osa:4335083|serine carboxypeptidase-like 10	--	serine carboxypeptidase-like 10 [Oryza sativa Japonica Group]
Os05g0142100	0.900747	0.195984	--	--	--	hypothetical protein OsI_18412 [Oryza sativa Indica Group]
Os01g0855200	0.00207384	-2.16231	Molecular Function: antioxidant activity (GO:0016209);; Cellular Component: intracellular membrane-bounded organelle (GO:0043231);; Biological Process: cellular detoxification (GO:1990748);;	--	--	uncharacterized protein LOC4324827 [Oryza sativa Japonica Group]
Os03g0273800	0.0169075	1.97036	Molecular Function: catalytic activity (GO:0003824);;	K07025|0|osa:4332401|suppressor of disruption of TFIIS	--	suppressor of disruption of TFIIS [Oryza sativa Japonica Group]
Os12g0153900	0.351253	-0.597624	--	--	--	uncharacterized protein LOC4351532 [Oryza sativa Japonica Group]
Os01g0877500	0.200479	1.00515	--	--	--	PHD finger protein At1g33420 [Oryza sativa Japonica Group]
Os02g0696500	0.511609	1.17619	--	K08235|0|osa:4330402|probable xyloglucan endotransglucosylase/hydrolase protein 30	--	probable xyloglucan endotransglucosylase/hydrolase protein 30 [Oryza sativa Japonica Group]
Os04g0288500	0.00867	-2.04899	Molecular Function: protein kinase activity (GO:0004672);; Biological Process: cellular protein modification process (GO:0006464);; Cellular Component: intrinsic component of membrane (GO:0031224);; Molecular Function: purine ribonucleoside binding (GO:0032550);; Cellular Component: intracellular membrane-bounded organelle (GO:0043231);;	--	--	L-type lectin-domain containing receptor kinase IX.1 [Oryza sativa Japonica Group]
xxx_newGene_2335	0.0885589	1.54826	Molecular Function: nucleic acid binding (GO:0003676);; Molecular Function: endopeptidase activity (GO:0004175);; Biological Process: protein metabolic process (GO:0019538);; Cellular Component: intrinsic component of membrane (GO:0031224);; Molecular Function: DNA polymerase activity (GO:0034061);; Molecular Function: transition metal ion binding (GO:0046914);; Biological Process: DNA biosynthet…	--	--	hypothetical protein [Oryza sativa Japonica Group]
Os01g0218900	0.360909	0.509588	Biological Process: metabolic process (GO:0008152);; Molecular Function: transferase activity, transferring one-carbon groups (GO:0016741);; Cellular Component: intracellular membrane-bounded organelle (GO:0043231);; Molecular Function: transition metal ion binding (GO:0046914);;	--	--	histone-lysine N-methyltransferase ATX3 [Oryza sativa Japonica Group]
Os02g0160800	0.71901	0.372457	--	--	--	Os02g0160800 [Oryza sativa Japonica Group]
Os06g0695600	0.617859	0.571834	Molecular Function: transition metal ion binding (GO:0046914);;	--	--	uncharacterized protein LOC4341936 [Oryza sativa Japonica Group]
Os03g0220100	0.577898	0.27719	Biological Process: fatty acid metabolic process (GO:0006631);; Molecular Function: transferase activity, transferring acyl groups (GO:0016746);; Cellular Component: intrinsic component of membrane (GO:0031224);;	K15397|0|osa:4332090|3-ketoacyl-CoA synthase 6	Fatty acid elongation (ko00062);; Plant-pathogen interaction (ko04626)	3-ketoacyl-CoA synthase 6 [Oryza sativa Japonica Group]
Os04g0691366	0.0939957	-1.24798	Cellular Component: intrinsic component of membrane (GO:0031224);; Biological Process: establishment of localization (GO:0051234);;	--	--	Os04g0691366 [Oryza sativa Japonica Group]
Os03g0139100	0.00691343	1.33841	--	--	--	Os03g0139100, partial [Oryza sativa Japonica Group]
Os01g0588200	0.0281795	1.7057	Molecular Function: voltage-gated ion channel activity (GO:0005244);; Biological Process: anion transport (GO:0006820);; Cellular Component: integral component of membrane (GO:0016021);; Molecular Function: wide pore channel activity (GO:0022829);; Cellular Component: mitochondrial membrane (GO:0031966);; Cellular Component: organelle outer membrane (GO:0031968);; Biological Process: regulation o…	K15040|0|osa:4327665|mitochondrial outer membrane protein porin 3	--	mitochondrial outer membrane protein porin 3 [Oryza sativa Japonica Group]
Os02g0584800	0.0845679	-0.923452	--	--	--	heavy metal-associated isoprenylated plant protein 47 [Oryza sativa Japonica Group]
Os06g0671700	0.612254	0.47633	Molecular Function: DNA binding (GO:0003677);; Molecular Function: DNA helicase activity (GO:0003678);; Biological Process: DNA metabolic process (GO:0006259);; Biological Process: DNA geometric change (GO:0032392);; Molecular Function: purine ribonucleoside binding (GO:0032550);;	--	--	Os06g0671700, partial [Oryza sativa Japonica Group]
Os07g0515000	0.535618	0.366256	Biological Process: tRNA metabolic process (GO:0006399);; Molecular Function: transferase activity, transferring one-carbon groups (GO:0016741);;	--	--	Os07g0515000, partial [Oryza sativa Japonica Group]
Os01g0579900	0.532809	0.293382	--	K06889|0|osa:4323861|uncharacterized protein LOC4323861 isoform X1	--	uncharacterized protein LOC4323861 isoform X1 [Oryza sativa Japonica Group]
Os02g0556600	0.401716	0.817131	--	K23334|0|osa:4329666|ran-binding protein 10	--	ran-binding protein M homolog [Oryza sativa Japonica Group]
Os02g0151300	2.95594e-07	-1.98059	Molecular Function: hydrolase activity, hydrolyzing O-glycosyl compounds (GO:0004553);; Biological Process: cellulose metabolic process (GO:0030243);; Biological Process: external encapsulating structure organization (GO:0045229);;	--	--	endoglucanase 5 [Oryza sativa Japonica Group]
Os01g0363300	0.159785	-1.26159	Cellular Component: intrinsic component of membrane (GO:0031224);; Cellular Component: intracellular membrane-bounded organelle (GO:0043231);;	--	--	CASP-like protein 1E1 [Oryza sativa Japonica Group]
Os06g0354700	0.216808	0.696452	--	--	--	hypothetical protein OsI_22903 [Oryza sativa Indica Group]
Os06g0143100	0.0754394	-1.51545	--	--	--	unknown protein [Oryza sativa Japonica Group]
Os07g0469200	0.151201	-1.6529	--	--	--	hypothetical protein OsI_17907 [Oryza sativa Indica Group]
Os08g0433300	0.810456	0.311839	Cellular Component: intracellular membrane-bounded organelle (GO:0043231);;	--	--	uncharacterized protein LOC4345651 [Oryza sativa Japonica Group]
Os06g0500300	0.343705	-0.966525	--	--	--	uncharacterized protein LOC4341115 isoform X1 [Oryza sativa Japonica Group]
Os05g0111000	0.775277	0.203618	Molecular Function: nucleic acid binding (GO:0003676);; Biological Process: DNA metabolic process (GO:0006259);; Biological Process: cellular response to stress (GO:0033554);; Cellular Component: intracellular membrane-bounded organelle (GO:0043231);; Molecular Function: transition metal ion binding (GO:0046914);;	K07466|0|osa:4337594|replication protein A 70 kDa DNA-binding subunit C	DNA replication (ko03030);; Nucleotide excision repair (ko03420);; Mismatch repair (ko03430);; Homologous recombination (ko03440)	replication protein A 70 kDa DNA-binding subunit C [Oryza sativa Japonica Group]
Os03g0407050	0.850179	0.16204	--	--	--	hypothetical protein OsJ_11214 [Oryza sativa Japonica Group]
Os01g0210800	0.115062	-0.689423	Molecular Function: phosphotransferase activity, for other substituted phosphate groups (GO:0016780);; Cellular Component: intrinsic component of membrane (GO:0031224);; Cellular Component: intracellular membrane-bounded organelle (GO:0043231);;	K01000|0|osa:4325561|phospho-N-acetylmuramoyl-pentapeptide- transferase homolog isoform X1	--	phospho-N-acetylmuramoyl-pentapeptide-transferase homolog isoform X1 [Oryza sativa Japonica Group]
Os12g0605200	0.390253	-0.596463	Molecular Function: cytoskeletal protein binding (GO:0008092);;	--	--	Os12g0605200, partial [Oryza sativa Japonica Group]
Os02g0528200	0.0163484	3.21895	--	K00700|0|osa:4329532|1,4-alpha-glucan-branching enzyme 2, chloroplastic/amyloplastic	Starch and sucrose metabolism (ko00500)	rice starch branching enzyme [Oryza sativa Japonica Group]
Os05g0477300	0.00094642	1.62468	--	K02976|8.25295e-39|sbi:8076999|40S ribosomal protein S26	Ribosome (ko03010)	putative 40S ribosomal protein S26 [Oryza sativa Japonica Group]
Os01g0720300	0.418542	0.611924	Molecular Function: cation binding (GO:0043169);; Cellular Component: intracellular membrane-bounded organelle (GO:0043231);; Biological Process: single-organism metabolic process (GO:0044710);; Molecular Function: cofactor binding (GO:0048037);; Molecular Function: NADH dehydrogenase (quinone) activity (GO:0050136);; Molecular Function: iron-sulfur cluster binding (GO:0051536);;	K03940|6.23938e-101|osa:107276869|NADH-quinone oxidoreductase subunit B-like	Oxidative phosphorylation (ko00190)	uncharacterized protein LOC107276869 [Oryza sativa Japonica Group]
Os04g0586100	0.778705	0.257402	--	--	--	uncharacterized protein LOC4336796 [Oryza sativa Japonica Group]
Os06g0649700	0.162434	-1.15223	--	--	--	cytochrome b561, DM13 and DOMON domain-containing protein At5g54830 [Oryza sativa Japonica Group]
Os08g0103900	1.63671e-08	-2.8132	Molecular Function: nucleic acid binding (GO:0003676);; Biological Process: transcription, DNA-templated (GO:0006351);; Cellular Component: intracellular membrane-bounded organelle (GO:0043231);;	--	--	NAC domain-containing protein 105 [Oryza sativa Japonica Group]
Os04g0534100	0.995187	0.00646051	--	--	--	O-glucosyltransferase rumi homolog isoform X3 [Oryza sativa Japonica Group]
Os08g0371200	0.446561	-1.09113	Molecular Function: oxidoreductase activity, acting on single donors with incorporation of molecular oxygen (GO:0016701);; Cellular Component: intracellular membrane-bounded organelle (GO:0043231);; Biological Process: single-organism metabolic process (GO:0044710);;	--	--	uncharacterized protein LOC4345406 isoform X4 [Oryza sativa Japonica Group]
Os06g0543200	0.0365296	-1.04383	Molecular Function: nucleic acid binding (GO:0003676);; Biological Process: transcription, DNA-templated (GO:0006351);; Cellular Component: intracellular membrane-bounded organelle (GO:0043231);;	--	--	uncharacterized protein LOC4341235 isoform X1 [Oryza sativa Japonica Group]
Os03g0806400	0.0635293	1.28374	Biological Process: translation (GO:0006412);; Molecular Function: translation factor activity, RNA binding (GO:0008135);; Cellular Component: intracellular membrane-bounded organelle (GO:0043231);;	--	--	Elongation factor P family protein, expressed [Oryza sativa Japonica Group]
Os12g0586600	0.976115	-0.0360853	--	K01537|0|osa:4352664|calcium-transporting ATPase 1, plasma membrane-type	--	calcium-transporting ATPase 10, plasma membrane-type [Oryza sativa Japonica Group]
Os06g0192600	0.224043	1.07385	--	K03061|0|zma:100274064|uncharacterized protein LOC100274064	Proteasome (ko03050)	26S protease regulatory subunit 7 [Striga asiatica]
Os02g0147300	0.221127	0.749635	--	K12828|0|osa:4328284|splicing factor 3B subunit 1 isoform X1	Spliceosome (ko03040)	Os02g0147300 [Oryza sativa Japonica Group]
Os01g0268800	0.342451	1.00672	Molecular Function: endopeptidase activity (GO:0004175);; Biological Process: protein metabolic process (GO:0019538);; Cellular Component: intrinsic component of membrane (GO:0031224);;	--	--	rhomboid-like protein 20 [Oryza sativa Japonica Group]
Os01g0255000	0.0473335	-0.899673	--	--	--	uncharacterized protein LOC4327714 isoform X1 [Oryza sativa Japonica Group]
Os03g0158300	0.16056	-1.00314	--	--	--	photosynthetic NDH subunit of subcomplex B 2, chloroplastic [Oryza sativa Japonica Group]
Os04g0687800	0.0284681	-1.36242	--	--	--	WAT1-related protein At1g68170 [Oryza sativa Japonica Group]
Os05g0545000	0.8378	0.112735	Cellular Component: intrinsic component of membrane (GO:0031224);; Cellular Component: cell part (GO:0044464);; Biological Process: establishment of localization (GO:0051234);;	--	--	unknown protein [Oryza sativa Japonica Group]
Os01g0532200	0.589757	0.262844	Cellular Component: intracellular ribonucleoprotein complex (GO:0030529);; Cellular Component: nuclear part (GO:0044428);;	K12821|0|osa:4327802|pre-mRNA-processing protein 40A isoform X1	Spliceosome (ko03040)	hypothetical protein OsJ_02081 [Oryza sativa Japonica Group]
Os08g0412401	0.660619	-0.203072	--	--	--	Os08g0412401, partial [Oryza sativa Japonica Group]
Os01g0870100	0.359949	-0.735489	Cellular Component: nuclear envelope (GO:0005635);; Molecular Function: ion transmembrane transporter activity (GO:0015075);; Biological Process: metal ion transport (GO:0030001);; Cellular Component: intrinsic component of membrane (GO:0031224);;	K21866|0|osa:4324936|probable ion channel POLLUX isoform X1	--	probable ion channel POLLUX [Oryza sativa Japonica Group]
Os02g0180200	0.360831	0.473175	--	--	--	nucleoid-associated protein At2g24020, chloroplastic [Oryza sativa Japonica Group]
Os01g0180850	0.102117	1.4122	--	K09489|0|osa:4325355|heat shock 70 kDa protein 15	--	heat shock 70 kDa protein 15 [Oryza sativa Japonica Group]
Os03g0571900	0.839328	0.278766	Molecular Function: secondary active transmembrane transporter activity (GO:0015291);; Biological Process: drug transport (GO:0015893);; Cellular Component: intrinsic component of membrane (GO:0031224);;	K03327|0|osa:4333289|protein DETOXIFICATION 40	--	protein DETOXIFICATION 40 [Oryza sativa Japonica Group]
Os01g0133400	0.254356	1.10066	--	--	--	plastidic glucose transporter 4 isoform X1 [Oryza sativa Japonica Group]
Os05g0557400	0.271256	-0.916586	Biological Process: immune system process (GO:0002376);; Biological Process: defense response (GO:0006952);; Biological Process: salicylic acid metabolic process (GO:0009696);; Biological Process: cellular response to stress (GO:0033554);;	--	--	MACPF domain-containing protein NSL1 [Oryza sativa Japonica Group]
Os01g0837600	0.339617	-0.843982	--	--	--	uncharacterized protein LOC4327369 isoform X1 [Oryza sativa Japonica Group]
Os06g0583400	0.369178	0.330477	--	K06067|0|osa:4341387|probable histone deacetylase 19	--	putative histone deacetylase HDAC1 [Oryza sativa Japonica Group]
Os03g0823500	0.398799	-0.512983	Biological Process: peptide transport (GO:0015833);; Cellular Component: intrinsic component of membrane (GO:0031224);;	--	--	protein NRT1/ PTR FAMILY 5.6 [Oryza sativa Japonica Group]
Os01g0600900	0.395974	-1.56535	--	K08912|1.09474e-173|osa:4324599|chlorophyll a-b binding protein 2, chloroplastic	Photosynthesis - antenna proteins (ko00196)	chlorophyll a-b binding protein 2, chloroplastic [Oryza sativa Japonica Group]
Os11g0695900	0.710852	-0.321162	--	--	--	uncharacterized protein LOC4351174 isoform X1 [Oryza sativa Japonica Group]
Os02g0178500	0.0304068	2.38954	--	--	--	protein CYPRO4 [Oryza sativa Japonica Group]
Os03g0769900	0.588958	0.580606	Cellular Component: intrinsic component of membrane (GO:0031224);; Cellular Component: intracellular membrane-bounded organelle (GO:0043231);;	--	--	protein PHLOEM PROTEIN 2-LIKE A10 [Oryza sativa Japonica Group]
Os04g0584900	0.091502	1.45488	--	--	--	protein MULTIPLE CHLOROPLAST DIVISION SITE 1 [Oryza sativa Japonica Group]
Os09g0517900	0.222847	-1.31447	--	K13691|0|osa:4347591|UDP-glycosyltransferase 74F2	--	UDP-glycosyltransferase 79-like [Oryza sativa Japonica Group]
Os03g0757900	0.469728	1.08464	--	K00012|0|osa:4334169|UDP-glucose 6-dehydrogenase 3	Pentose and glucuronate interconversions (ko00040);; Ascorbate and aldarate metabolism (ko00053);; Amino sugar and nucleotide sugar metabolism (ko00520);; Biosynthesis of cofactors (ko01240)	UDP-glucose 6-dehydrogenase 3 [Oryza sativa Japonica Group]
Os03g0237000	0.549455	0.381536	Cellular Component: intrinsic component of membrane (GO:0031224);;	--	--	transmembrane 9 superfamily member 3 [Oryza sativa Japonica Group]
Os08g0557000	0.0491967	-1.26259	Biological Process: protein alkylation (GO:0008213);; Molecular Function: S-adenosylmethionine-dependent methyltransferase activity (GO:0008757);;	--	--	protein-L-isoaspartate O-methyltransferase 1 isoform X3 [Oryza sativa Japonica Group]
Os01g0590700	0.404844	0.779089	Molecular Function: endopeptidase activity (GO:0004175);; Cellular Component: chloroplast (GO:0009507);; Cellular Component: membrane (GO:0016020);; Biological Process: protein metabolic process (GO:0019538);; Molecular Function: purine ribonucleoside binding (GO:0032550);; Cellular Component: intracellular organelle part (GO:0044446);;	--	--	hypothetical protein EE612_003812 [Oryza sativa]
Os09g0470701	0.410279	-1.0439	Molecular Function: nucleic acid binding transcription factor activity (GO:0001071);; Molecular Function: DNA binding (GO:0003677);; Biological Process: transcription, DNA-templated (GO:0006351);; Cellular Component: intracellular membrane-bounded organelle (GO:0043231);;	K09338|1.11973e-114|osa:4347333|homeobox-leucine zipper protein HOX4	--	homeobox-leucine zipper protein HOX4 [Oryza sativa Japonica Group]
Os01g0618200	0.0800446	-1.08251	--	K17506|2.06466e-130|osa:9269413|probable protein phosphatase 2C 7	--	hypothetical protein OsJ_02626 [Oryza sativa Japonica Group]
Os02g0811101	0.81011	0.404088	--	--	--	Os02g0811101 [Oryza sativa Japonica Group]
Os02g0611300	0.961938	0.0350847	Molecular Function: protein-lysine N-methyltransferase activity (GO:0016279);; Biological Process: histone methylation (GO:0016571);; Cellular Component: intracellular membrane-bounded organelle (GO:0043231);; Molecular Function: transition metal ion binding (GO:0046914);;	K11423|0|osa:4329956|LOW QUALITY PROTEIN: histone-lysine N-methyltransferase ASHR3	--	LOW QUALITY PROTEIN: histone-lysine N-methyltransferase ASHR3-like [Oryza sativa Japonica Group]
Os05g0274900	0.0905577	0.827722	--	--	--	Os05g0274900, partial [Oryza sativa Japonica Group]
Os02g0533200	0.0376951	-1.39982	Cellular Component: chloroplast thylakoid (GO:0009534);; Cellular Component: chloroplast stroma (GO:0009570);;	--	--	heme-binding-like protein At3g10130, chloroplastic [Oryza sativa Japonica Group]
Os04g0423400	0.0224914	2.2232	--	--	--	filaggrin-2 [Oryza sativa Japonica Group]
Os02g0704966	0.501906	0.459724	Molecular Function: nucleic acid binding (GO:0003676);; Biological Process: DNA metabolic process (GO:0006259);; Molecular Function: ubiquitin-like protein transferase activity (GO:0019787);; Biological Process: protein modification by small protein conjugation (GO:0032446);; Molecular Function: purine ribonucleoside binding (GO:0032550);;	--	--	uncharacterized protein LOC107275933 isoform X1 [Oryza sativa Japonica Group]
Os05g0432400	0.220383	0.992879	--	--	--	uncharacterized protein At5g49945 [Oryza sativa Japonica Group]
Os09g0244600	0.157812	2.18959	--	--	--	Os09g0244600, partial [Oryza sativa Japonica Group]
Os05g0122900	0.427556	0.500087	Cellular Component: mitochondrion (GO:0005739);; Biological Process: response to hormone (GO:0009725);; Cellular Component: organelle inner membrane (GO:0019866);; Cellular Component: intrinsic component of membrane (GO:0031224);;	--	--	hypothetical protein OsI_18259 [Oryza sativa Indica Group]
Os07g0229800	0.0594092	0.980399	Molecular Function: nucleotide binding (GO:0000166);; Biological Process: glycerol-3-phosphate metabolic process (GO:0006072);; Biological Process: phospholipid metabolic process (GO:0006644);; Biological Process: lipid biosynthetic process (GO:0008610);; Cellular Component: plastid envelope (GO:0009526);; Biological Process: defense response, incompatible interaction (GO:0009814);; Molecular Fun…	K00006|0|osa:4342770|glycerol-3-phosphate dehydrogenase [NAD(+)], chloroplastic	Glycerophospholipid metabolism (ko00564)	glycerol-3-phosphate dehydrogenase [NAD(+)], chloroplastic [Oryza sativa Japonica Group]
Os08g0478700	0.839461	0.58235	--	--	--	hypothetical protein OsI_29614 [Oryza sativa Indica Group]
Os01g0709750	0.848962	0.277601	--	--	--	receptor-like serine/threonine-protein kinase ALE2 isoform X7 [Oryza sativa Japonica Group]
Os09g0551600	0.296632	-0.798011	--	--	--	HMG1/2-like protein isoform X2 [Oryza sativa Japonica Group]
Os02g0131100	0.017659	-1.19981	--	--	--	titin homolog [Oryza sativa Japonica Group]
Os01g0924000	0.315621	-0.741707	Molecular Function: structural molecule activity (GO:0005198);; Cellular Component: ribosome (GO:0005840);; Cellular Component: plastid (GO:0009536);; Biological Process: gene expression (GO:0010467);; Cellular Component: intrinsic component of membrane (GO:0031224);;	K02899|1.1251e-55|osa:4327257|50S ribosomal protein L27, chloroplastic	Ribosome (ko03010)	50S ribosomal protein L27, chloroplastic [Oryza sativa Japonica Group]
Os10g0190000	0.964093	0.0285017	--	--	--	Ubiquitin-conjugating enzyme E2 M, putative, expressed [Oryza sativa Japonica Group]
Os04g0468600	2.12791e-05	-3.61085	--	--	--	Os04g0468600, partial [Oryza sativa Japonica Group]
Os07g0438600	0.0421134	2.53153	--	--	--	subtilisin-like protease SBT5.4 [Oryza sativa Japonica Group]
Os01g0925700	0.523561	0.467201	Molecular Function: protein kinase activity (GO:0004672);; Biological Process: protein phosphorylation (GO:0006468);; Cellular Component: membrane (GO:0016020);; Molecular Function: purine ribonucleoside binding (GO:0032550);;	--	--	probable serine/threonine-protein kinase At1g54610 [Oryza sativa Japonica Group]
Os01g0346700	0.0474904	-0.753206	--	--	--	hypothetical protein OsI_01802 [Oryza sativa Indica Group]
Os03g0674300	0.0986882	1.74431	Cellular Component: intrinsic component of membrane (GO:0031224);;	--	--	Os03g0674300, partial [Oryza sativa Japonica Group]
Os11g0148000	0.623043	0.552029	Biological Process: sodium ion transport (GO:0006814);; Cellular Component: intrinsic component of membrane (GO:0031224);; Cellular Component: nuclear lumen (GO:0031981);; Molecular Function: metal ion transmembrane transporter activity (GO:0046873);; Biological Process: potassium ion transmembrane transport (GO:0071805);;	--	--	hypothetical protein OsI_35101 [Oryza sativa Indica Group]
Os08g0206400	0.138962	1.52331	Cellular Component: intrinsic component of membrane (GO:0031224);; Molecular Function: metal ion transmembrane transporter activity (GO:0046873);; Biological Process: cellular potassium ion transport (GO:0071804);;	K03549|0|osa:9270408|putative potassium transporter 12 isoform X1	--	putative potassium transporter 12 isoform X1 [Oryza sativa Japonica Group]
Os12g0156866	5.36886e-06	-1.94255	--	--	--	cationic amino acid transporter 6, chloroplastic [Oryza sativa Japonica Group]
Os07g0647800	0.131599	-0.580492	Biological Process: organelle organization (GO:0006996);; Molecular Function: ubiquitin-like protein transferase activity (GO:0019787);; Cellular Component: intrinsic component of membrane (GO:0031224);; Biological Process: protein modification by small protein conjugation (GO:0032446);; Molecular Function: transition metal ion binding (GO:0046914);;	--	--	Os07g0647800 [Oryza sativa Japonica Group]
Os12g0183300	0.592287	-0.891266	Molecular Function: nucleotidase activity (GO:0008252);; Biological Process: phosphatidylinositol metabolic process (GO:0046488);; Molecular Function: metal ion binding (GO:0046872);;	--	--	Os12g0183300, partial [Oryza sativa Japonica Group]
Os01g0174700	0.770189	0.315411	--	--	--	protein kinase PINOID 2 [Oryza sativa Japonica Group]
Os07g0209000	0.337745	0.464549	Biological Process: cell morphogenesis (GO:0000902);; Cellular Component: cell wall (GO:0005618);; Cellular Component: cell-cell junction (GO:0005911);; Biological Process: protein N-linked glycosylation (GO:0006487);; Molecular Function: transferase activity (GO:0016740);; Cellular Component: intrinsic component of membrane (GO:0031224);; Cellular Component: nuclear lumen (GO:0031981);; Cellular…	K12670|0|osa:4342702|dolichyl-diphosphooligosaccharide--protein glycosyltransferase 48 kDa subunit	N-Glycan biosynthesis (ko00510);; Various types of N-glycan biosynthesis (ko00513);; Protein processing in endoplasmic reticulum (ko04141)	dolichyl-diphosphooligosaccharide--protein glycosyltransferase 48 kDa subunit [Oryza sativa Japonica Group]
Os11g0131200	0.0152963	1.35508	Cellular Component: plastid envelope (GO:0009526);; Cellular Component: intrinsic component of membrane (GO:0031224);;	K13347|1.95292e-139|osa:4349678|protein SYM1	Peroxisome (ko04146)	protein SYM1 [Oryza sativa Japonica Group]
Os02g0605600	0.807063	0.176461	--	--	--	putative RNA-binding protein Luc7-like 2 isoform X1 [Oryza sativa Japonica Group]
Os12g0527800	0.742559	0.218997	--	--	--	uncharacterized protein LOC4352386 isoform X1 [Oryza sativa Japonica Group]
Os04g0518100	0.0678147	1.42268	Biological Process: L-phenylalanine metabolic process (GO:0006558);; Biological Process: phenylpropanoid biosynthetic process (GO:0009699);; Molecular Function: ammonia-lyase activity (GO:0016841);; Cellular Component: intracellular part (GO:0044424);;	--	--	phenylalanine ammonia-lyase-like [Oryza sativa Japonica Group]
Os04g0415000	0.619775	0.243311	--	--	--	uncharacterized protein LOC4335802 [Oryza sativa Japonica Group]
Os02g0106100	2.90188e-11	5.95159	Molecular Function: beta-fructofuranosidase activity (GO:0004564);; Cellular Component: intrinsic component of membrane (GO:0031224);; Biological Process: primary metabolic process (GO:0044238);;	K21351|0|osa:4328018|sucrose:sucrose 1-fructosyltransferase	--	sucrose:sucrose 1-fructosyltransferase [Oryza sativa Japonica Group]
Os07g0604550	0.563538	0.380116	--	K17795|2.07725e-113|osa:107278397|mitochondrial import inner membrane translocase subunit TIM17-2-like	--	mitochondrial import inner membrane translocase subunit TIM17-2 [Oryza sativa Japonica Group]
Os03g0333400	0.20168	-2.52818	--	K08902|8.87501e-83|osa:4332745|photosystem II repair protein PSB27-H1, chloroplastic	Photosynthesis (ko00195)	photosystem II repair protein PSB27-H1, chloroplastic [Oryza sativa Japonica Group]
Os02g0537900	0.261019	0.644137	Biological Process: hydrogen transport (GO:0006818);; Molecular Function: P-P-bond-hydrolysis-driven transmembrane transporter activity (GO:0015405);; Molecular Function: pyrophosphatase activity (GO:0016462);; Cellular Component: intrinsic component of membrane (GO:0031224);;	K23025|0|osa:4329579|pyrophosphate-energized membrane proton pump 3 isoform X1	--	pyrophosphate-energized membrane proton pump 3 isoform X3 [Oryza sativa Japonica Group]
Os02g0258800	0.0354116	1.49974	--	--	--	uncharacterized protein LOC4328929 [Oryza sativa Japonica Group]
Os01g0362000	0.953639	-0.0476237	Cellular Component: intrinsic component of membrane (GO:0031224);; Cellular Component: intracellular membrane-bounded organelle (GO:0043231);;	--	--	Os01g0362000, partial [Oryza sativa Japonica Group]
Os02g0807700	0.59949	-0.385115	--	--	--	protein LOL1 isoform X1 [Oryza sativa Japonica Group]
Os02g0125300	0.199932	1.44291	Biological Process: apoptotic process (GO:0006915);; Cellular Component: intrinsic component of membrane (GO:0031224);;	--	--	bax inhibitor 1 [Oryza sativa Japonica Group]
Os04g0474700	0.00580543	-1.10889	--	--	--	Os04g0474700 [Oryza sativa Japonica Group]
Os03g0758300	0.134459	0.715579	--	--	--	Os03g0758300 [Oryza sativa Japonica Group]
Os01g0208600	0.319905	-0.46828	Biological Process: cytoskeleton organization (GO:0007010);; Molecular Function: cytoskeletal protein binding (GO:0008092);; Cellular Component: intracellular non-membrane-bounded organelle (GO:0043232);;	--	--	SCAR-like protein 2 isoform X2 [Oryza sativa Japonica Group]
Os07g0596000	0.171819	-0.868714	--	K20027|0|osa:9267772|probable protein S-acyltransferase 22	--	probable protein S-acyltransferase 22 [Oryza sativa Japonica Group]
Os01g0829800	0.305101	1.01797	Biological Process: citrate metabolic process (GO:0006101);; Molecular Function: malate dehydrogenase activity (GO:0016615);; Cellular Component: intracellular membrane-bounded organelle (GO:0043231);; Biological Process: dicarboxylic acid metabolic process (GO:0043648);; Biological Process: primary metabolic process (GO:0044238);;	K00026|0|osa:4327423|malate dehydrogenase, chloroplastic	Citrate cycle (TCA cycle) (ko00020);; Cysteine and methionine metabolism (ko00270);; Pyruvate metabolism (ko00620);; Glyoxylate and dicarboxylate metabolism (ko00630);; Carbon fixation in photosynthetic organisms (ko00710);; Carbon metabolism (ko01200)	malate dehydrogenase, chloroplastic [Oryza sativa Japonica Group]
Os02g0549700	0.646347	0.22221	Cellular Component: intracellular membrane-bounded organelle (GO:0043231);;	--	--	uncharacterized protein LOC9268621 [Oryza sativa Japonica Group]
Os02g0135700	0.115062	0.761758	Molecular Function: nucleic acid binding (GO:0003676);; Cellular Component: cytoplasm (GO:0005737);; Biological Process: DNA metabolic process (GO:0006259);; Biological Process: gene expression (GO:0010467);; Molecular Function: DNA polymerase activity (GO:0034061);;	K02331|0|osa:4328227|myb-binding protein 1A-like protein	--	myb-binding protein 1A-like protein [Oryza sativa Japonica Group]
Os06g0581151	0.281362	-0.756809	--	--	--	protein NRT1/ PTR FAMILY 4.6 [Oryza sativa Japonica Group]
Os04g0373400	0.91399	0.194825	Molecular Function: secondary active transmembrane transporter activity (GO:0015291);; Biological Process: drug transport (GO:0015893);; Cellular Component: intrinsic component of membrane (GO:0031224);;	K03327|0|osa:4335602|protein DETOXIFICATION 16	--	protein DETOXIFICATION 16 [Oryza sativa Japonica Group]
Os06g0192000	0.410126	-0.73611	Biological Process: cellular protein modification process (GO:0006464);; Biological Process: phosphate-containing compound metabolic process (GO:0006796);; Molecular Function: kinase activity (GO:0016301);; Molecular Function: purine ribonucleoside binding (GO:0032550);; Biological Process: response to stimulus (GO:0050896);;	--	--	U-box domain-containing protein 52 isoform X3 [Oryza sativa Japonica Group]
Os05g0393700	0.180821	1.41159	Molecular Function: glycogen debranching enzyme activity (GO:0004133);; Biological Process: cellular glucan metabolic process (GO:0006073);; Biological Process: macromolecule biosynthetic process (GO:0009059);; Cellular Component: plastid (GO:0009536);; Molecular Function: hydrolase activity, acting on glycosyl bonds (GO:0016798);;	--	--	Os05g0393700, partial [Oryza sativa Japonica Group]
Os02g0656200	0.285066	0.686745	Molecular Function: lipid kinase activity (GO:0001727);; Biological Process: sphingolipid metabolic process (GO:0006665);; Biological Process: programmed cell death (GO:0012501);; Biological Process: phosphorylation (GO:0016310);; Molecular Function: purine ribonucleoside binding (GO:0032550);; Molecular Function: metal ion binding (GO:0046872);;	--	--	Os02g0656200 [Oryza sativa Japonica Group]
Os09g0551300	0.335453	0.59676	Molecular Function: nucleic acid binding (GO:0003676);; Biological Process: metabolic process (GO:0008152);; Molecular Function: methyltransferase activity (GO:0008168);; Biological Process: ribosome biogenesis (GO:0042254);; Cellular Component: intracellular membrane-bounded organelle (GO:0043231);;	K14835|0|osa:4347787|25S rRNA (cytosine-C(5))-methyltransferase nop2	--	25S rRNA (cytosine-C(5))-methyltransferase nop2 [Oryza sativa Japonica Group]
Os01g0721300	0.0515606	1.64055	Molecular Function: purine ribonucleoside binding (GO:0032550);;	--	--	putative disease resistance protein RGA3 [Oryza sativa Japonica Group]
Os08g0158500	0.66724	0.190881	--	--	--	stomatin-like protein 2, mitochondrial [Oryza sativa Japonica Group]
Os06g0250600	0.305955	0.808663	--	K21867|0|osa:4340653|potassium channel KOR1	--	potassium channel KOR1 [Oryza sativa Japonica Group]
Os01g0284900	0.131161	1.80542	--	--	--	uncharacterized protein LOC4327913 [Oryza sativa Japonica Group]
Os05g0595400	0.292457	0.493016	Biological Process: nucleoside diphosphate metabolic process (GO:0009132);; Biological Process: purine ribonucleotide biosynthetic process (GO:0009152);; Biological Process: pyrimidine ribonucleoside triphosphate biosynthetic process (GO:0009209);; Molecular Function: phosphotransferase activity, phosphate group as acceptor (GO:0016776);; Molecular Function: purine ribonucleoside binding (GO:0032…	K00940|3.92869e-131|osa:4339815|nucleoside diphosphate kinase 3	Purine metabolism (ko00230);; Pyrimidine metabolism (ko00240);; Biosynthesis of cofactors (ko01240);; MAPK signaling pathway - plant (ko04016)	hypothetical protein OsJ_19780 [Oryza sativa Japonica Group]
Os01g0784800	0.334719	0.878683	Molecular Function: catalytic activity (GO:0003824);; Biological Process: transcription, DNA-templated (GO:0006351);; Molecular Function: ribonucleotide binding (GO:0032553);; Biological Process: single-organism metabolic process (GO:0044710);;	K03809|1.94532e-132|osa:4327039|NAD(P)H dehydrogenase (quinone) FQR1	Ubiquinone and other terpenoid-quinone biosynthesis (ko00130);; Biosynthesis of cofactors (ko01240)	NAD(P)H dehydrogenase (quinone) FQR1 [Oryza sativa Japonica Group]
Os11g0174000	0.269877	0.501045	Biological Process: protein transport (GO:0015031);; Cellular Component: vesicle coat (GO:0030120);; Cellular Component: COPI-coated vesicle (GO:0030137);;	K17301|0|osa:4349913|coatomer subunit beta-1	--	coatomer subunit beta-1 [Oryza sativa Japonica Group]
Os06g0717600	0.33523	0.789129	Cellular Component: intrinsic component of membrane (GO:0031224);; Molecular Function: transition metal ion binding (GO:0046914);;	--	--	NEP1-interacting protein-like 1 [Oryza sativa Japonica Group]
Os02g0120800	0.2517	-1.21961	Cellular Component: membrane (GO:0016020);; Molecular Function: purine ribonucleoside binding (GO:0032550);; Biological Process: intracellular signal transduction (GO:0035556);; Cellular Component: intracellular part (GO:0044424);;	K04392|1.38185e-127|zma:542094|rop9; Rho-related protein from plants 9	Phagosome (ko04145)	Rho-related protein from plants 9 [Zea mays]
Os04g0671200	0.592036	0.726355	Molecular Function: transferase activity, transferring one-carbon groups (GO:0016741);; Biological Process: single-organism metabolic process (GO:0044710);;	K17839|0|osa:4337359|probable polyamine oxidase 2	Arginine and proline metabolism (ko00330);; beta-Alanine metabolism (ko00410);; Pantothenate and CoA biosynthesis (ko00770)	probable polyamine oxidase 2 [Oryza sativa Japonica Group]
Os01g0675100	0.125155	-0.750897	Molecular Function: catalytic activity (GO:0003824);; Molecular Function: antioxidant activity (GO:0016209);; Cellular Component: intracellular part (GO:0044424);; Biological Process: single-organism metabolic process (GO:0044710);; Biological Process: cellular detoxification (GO:1990748);;	K24140|3.06198e-112|osa:4325511|peroxiredoxin-2C	--	peroxiredoxin-2C [Oryza sativa Japonica Group]
Os10g0497300	0.728615	-0.303961	Molecular Function: transferase activity (GO:0016740);; Cellular Component: intracellular membrane-bounded organelle (GO:0043231);;	--	--	hypothetical protein [Oryza sativa Japonica Group]
Os01g0705500	0.757352	0.205746	--	--	--	uncharacterized protein LOC4324256 [Oryza sativa Japonica Group]
Os10g0567600	0.415343	-0.887222	--	--	--	protein doublesex [Oryza sativa Japonica Group]
Os04g0498000	0.00196024	2.44859	--	--	--	Os04g0498000, partial [Oryza sativa Japonica Group]
Os04g0661200	0.0990836	1.63998	Biological Process: phosphate-containing compound metabolic process (GO:0006796);; Molecular Function: kinase activity (GO:0016301);; Molecular Function: purine ribonucleoside binding (GO:0032550);; Molecular Function: cation binding (GO:0043169);;	K10572|0|osa:4337286|inositol-pentakisphosphate 2-kinase IPK1	Inositol phosphate metabolism (ko00562);; Phosphatidylinositol signaling system (ko04070)	inositol-pentakisphosphate 2-kinase IPK1 [Oryza sativa Japonica Group]
Os01g0836800	0.668947	0.372472	Cellular Component: intrinsic component of membrane (GO:0031224);;	K22985|0|osa:4327461|protein GPR107	--	protein GPR107 [Oryza sativa Japonica Group]
Os03g0236966	0.517364	0.388391	Molecular Function: catalytic activity (GO:0003824);; Biological Process: tissue development (GO:0009888);; Biological Process: regulation of cell cycle process (GO:0010564);; Cellular Component: intrinsic component of membrane (GO:0031224);; Biological Process: single-organism metabolic process (GO:0044710);;	--	--	Os03g0236966, partial [Oryza sativa Japonica Group]
Os01g0626300	0.0979477	1.4532	--	K17771|6.73355e-28|osa:4326689|mitochondrial import receptor subunit TOM7-1	--	mitochondrial import receptor subunit TOM7-1 [Oryza sativa Japonica Group]
Os07g0147800	0.194601	-0.771579	--	--	--	WPP domain-associated protein [Oryza sativa Japonica Group]
Os04g0403500	0.373629	-0.697415	--	--	--	uncharacterized protein At1g32220, chloroplastic [Oryza sativa Japonica Group]
Os05g0594700	0.222614	0.848475	Cellular Component: intrinsic component of membrane (GO:0031224);;	K21989|0|osa:4339808|calcium permeable stress-gated cation channel 1	--	calcium permeable stress-gated cation channel 1 [Oryza sativa Japonica Group]
Os01g0818400	0.843379	0.22731	Molecular Function: nucleic acid binding (GO:0003676);; Biological Process: transcription, DNA-templated (GO:0006351);; Cellular Component: intracellular membrane-bounded organelle (GO:0043231);; Biological Process: single-multicellular organism process (GO:0044707);;	--	--	WUSCHEL-related homeobox 8 [Oryza sativa Japonica Group]
Os01g0585100	2.51053e-05	4.36365	--	--	--	uncharacterized membrane protein C776.05 isoform X1 [Oryza sativa Japonica Group]
Os03g0570200	0.948214	0.0340816	Biological Process: pollen wall assembly (GO:0010208);; Cellular Component: intrinsic component of membrane (GO:0031224);; Cellular Component: intracellular membrane-bounded organelle (GO:0043231);;	--	--	Os03g0570200 [Oryza sativa Japonica Group]
Os09g0134500	0.762432	0.188376	Biological Process: signal transduction (GO:0007165);; Biological Process: metabolic process (GO:0008152);; Molecular Function: transferase activity, transferring one-carbon groups (GO:0016741);; Cellular Component: intrinsic component of membrane (GO:0031224);; Cellular Component: intracellular membrane-bounded organelle (GO:0043231);; Molecular Function: transition metal ion binding (GO:0046914…	--	--	histone-lysine N-methyltransferase TRX1 [Oryza sativa Japonica Group]
Os01g0347000	1.38229e-06	-2.51761	--	K14165|0|osa:4326496|dual specificity protein phosphatase PHS1	--	dual specificity protein phosphatase PHS1 isoform X1 [Oryza sativa Japonica Group]
Os07g0231800	0.221871	0.594243	--	--	--	uncharacterized protein LOC4342778 [Oryza sativa Japonica Group]
Os02g0575900	0.218669	1.66931	--	--	--	exocyst complex component EXO70A1 isoform X1 [Oryza sativa Japonica Group]
Os01g0622066	0.0117837	-1.45021	--	--	--	hypothetical protein EE612_004143 [Oryza sativa]
Os02g0754300	0.0266799	1.20851	--	K02904|1.26538e-71|osa:4330763|50S ribosomal protein L29, chloroplastic	Ribosome (ko03010)	50S ribosomal protein L29, chloroplastic [Oryza sativa Japonica Group]
Os12g0613500	0.0824486	1.04256	--	--	--	hypothetical protein OsJ_36857 [Oryza sativa Japonica Group]
Os10g0184300	0.200045	1.32616	--	--	--	Os10g0184300, partial [Oryza sativa Japonica Group]
Os06g0141200	0.0149582	-2.27467	Molecular Function: catalytic activity (GO:0003824);; Cellular Component: plastid (GO:0009536);; Molecular Function: transition metal ion binding (GO:0046914);;	--	--	uncharacterized RNA-binding protein C17H9.04c [Oryza sativa Japonica Group]
Os05g0220100	0.19357	0.893189	--	K23553|0|osa:4338126|post-GPI attachment to proteins factor 3	--	post-GPI attachment to proteins factor 3 [Oryza sativa Japonica Group]
Os02g0763200	0.334123	1.30408	--	K13681|0|osa:4330821|galactoside 2-alpha-L-fucosyltransferase	--	galactoside 2-alpha-L-fucosyltransferase [Oryza sativa Japonica Group]
Os06g0210100	0.652804	0.276655	--	K20352|3.20683e-134|osa:4340456|transmembrane emp24 domain-containing protein p24delta3	--	Os06g0210100, partial [Oryza sativa Japonica Group]
Os04g0442000	0.0782905	-1.02912	Molecular Function: nucleic acid binding (GO:0003676);; Biological Process: transcription, DNA-templated (GO:0006351);; Biological Process: hormone-mediated signaling pathway (GO:0009755);; Cellular Component: intracellular membrane-bounded organelle (GO:0043231);;	K14486|0|osa:4335934|auxin response factor 9 isoform X1	Plant hormone signal transduction (ko04075)	OSJNBa0064D20.11 [Oryza sativa Japonica Group]
Os12g0477600	0.482483	0.526731	--	--	--	Os12g0477600, partial [Oryza sativa Japonica Group]
Os08g0369700	0.372819	0.479518	--	K22072|5.45089e-74|osa:4345405|iron-sulfur assembly protein IscA-like 2, mitochondrial	--	iron-sulfur assembly protein IscA-like 2, mitochondrial [Oryza sativa Japonica Group]
Os02g0470600	0.678351	-0.193444	--	--	--	Os02g0470600 [Oryza sativa Japonica Group]
Os03g0256400	0.203885	0.693658	--	K01663|0|osa:4332296|imidazole glycerol phosphate synthase hisHF, chloroplastic	Histidine metabolism (ko00340);; Biosynthesis of amino acids (ko01230)	imidazole glycerol phosphate synthase hisHF, chloroplastic [Oryza sativa Japonica Group]
Os08g0154000	0.440887	0.759005	--	--	--	uncharacterized protein LOC4344681 [Oryza sativa Japonica Group]
Os03g0565500	0.326509	0.393311	Biological Process: translational elongation (GO:0006414);; Molecular Function: translation factor activity, RNA binding (GO:0008135);; Molecular Function: nucleoside-triphosphatase activity (GO:0017111);; Molecular Function: purine ribonucleoside binding (GO:0032550);; Cellular Component: intracellular membrane-bounded organelle (GO:0043231);;	K02355|0|osa:4333268|elongation factor G, mitochondrial	--	elongation factor G, mitochondrial [Oryza sativa Japonica Group]
Os01g0897600	0.338674	-0.657337	--	K01188|0|osa:4325106|beta-glucosidase 4 isoform X2	Cyanoamino acid metabolism (ko00460);; Starch and sucrose metabolism (ko00500);; Phenylpropanoid biosynthesis (ko00940)	beta-glucosidase 4 isoform X2 [Oryza sativa Japonica Group]
Os09g0412300	0.137629	2.71441	--	--	--	hypothetical protein OsI_31346 [Oryza sativa Indica Group]
Os09g0418500	0.0379987	2.68741	Molecular Function: protein kinase activity (GO:0004672);; Biological Process: cellular protein modification process (GO:0006464);; Biological Process: phosphate-containing compound metabolic process (GO:0006796);; Biological Process: hyperosmotic response (GO:0006972);; Biological Process: cell communication (GO:0007154);; Biological Process: auxin polar transport (GO:0009926);; Molecular Functi…	--	--	Os09g0418500, partial [Oryza sativa Japonica Group]
Os03g0622300	0.75189	0.587618	Molecular Function: nucleic acid binding (GO:0003676);; Biological Process: transcription, DNA-templated (GO:0006351);; Cellular Component: intracellular membrane-bounded organelle (GO:0043231);;	--	--	Os03g0622300 [Oryza sativa Japonica Group]
Os12g0149000	0.24355	1.56821	Cellular Component: intracellular membrane-bounded organelle (GO:0043231);;	--	--	uncharacterized protein LOC4351505 [Oryza sativa Japonica Group]
Os02g0671400	0.214411	-0.977788	--	--	--	Os02g0671400 [Oryza sativa Japonica Group]
Os07g0211900	0.496442	0.67874	--	--	--	nitrate regulatory gene2 protein [Oryza sativa Japonica Group]
Os10g0100900	0.93121	0.0624638	--	--	--	G-type lectin S-receptor-like serine/threonine-protein kinase At1g34300 [Oryza sativa Japonica Group]
Os01g0513200	0.331406	0.488239	Biological Process: nucleotide transport (GO:0006862);; Cellular Component: intrinsic component of membrane (GO:0031224);; Molecular Function: cofactor transporter activity (GO:0051184);;	K15115|5.48943e-85|osa:9266735|nicotinamide adenine dinucleotide transporter 2, mitochondrial	--	hypothetical protein OsI_02162 [Oryza sativa Indica Group]
Os09g0516500	0.453245	0.506834	Cellular Component: cell-cell junction (GO:0005911);; Biological Process: steroid metabolic process (GO:0008202);; Molecular Function: thiolester hydrolase activity (GO:0016790);; Cellular Component: intrinsic component of membrane (GO:0031224);; Molecular Function: steroid dehydrogenase activity, acting on the CH-OH group of donors, NAD or NADP as acceptor (GO:0033764);; Cellular Component: intr…	K23558|0|osa:4347580|3beta-hydroxysteroid-dehydrogenase/decarboxylase isoform 2	Steroid biosynthesis (ko00100)	3beta-hydroxysteroid-dehydrogenase/decarboxylase [Oryza sativa Japonica Group]
Os01g0901200	0.443738	0.649851	--	K03553|0|osa:4325041|DNA repair protein recA homolog 3, mitochondrial	Homologous recombination (ko03440)	DNA repair protein recA homolog 3, mitochondrial [Oryza sativa Japonica Group]
Os02g0656300	0.27807	0.611236	Cellular Component: nuclear ubiquitin ligase complex (GO:0000152);; Biological Process: defense response (GO:0006952);; Biological Process: metaphase/anaphase transition of mitotic cell cycle (GO:0007091);;	K03355|0|osa:4330199|anaphase-promoting complex subunit 8	Ubiquitin mediated proteolysis (ko04120)	anaphase-promoting complex subunit 8 [Oryza sativa Japonica Group]
Os12g0111700	0.0569412	1.03071	Cellular Component: intracellular membrane-bounded organelle (GO:0043231);;	--	--	Os12g0111700 [Oryza sativa Japonica Group]
Os03g0640800	0.267127	-0.502425	Molecular Function: nucleic acid binding (GO:0003676);; Biological Process: transcription, DNA-templated (GO:0006351);; Cellular Component: intracellular membrane-bounded organelle (GO:0043231);;	K09338|0|osa:4333544|homeobox-leucine zipper protein HOX32	--	homeobox-leucine zipper protein HOX32 [Oryza sativa Japonica Group]
Os09g0127800	0.805115	0.200189	--	K05236|0|osa:4346440|coatomer subunit alpha-3 isoform X1	--	coatomer subunit alpha-3 isoform X1 [Oryza sativa Japonica Group]
Os04g0404800	0.97645	0.0422134	Biological Process: acetate metabolic process (GO:0006083);; Molecular Function: CoA-ligase activity (GO:0016405);; Molecular Function: purine ribonucleoside binding (GO:0032550);; Cellular Component: intracellular membrane-bounded organelle (GO:0043231);;	K01895|0|osa:4335745|acetyl-coenzyme A synthetase, chloroplastic/glyoxysomal	Glycolysis / Gluconeogenesis (ko00010);; Pyruvate metabolism (ko00620);; Glyoxylate and dicarboxylate metabolism (ko00630);; Propanoate metabolism (ko00640);; Carbon metabolism (ko01200)	acetyl-coenzyme A synthetase, chloroplastic/glyoxysomal [Oryza sativa Japonica Group]
Os01g0924900	0.657071	0.176837	Molecular Function: nucleic acid binding (GO:0003676);;	K17046|0|osa:4327229|protein DEK	--	protein DEK [Oryza sativa Japonica Group]
xxx_newGene_7281	0.608934	-0.544087	Molecular Function: nucleic acid binding (GO:0003676);; Molecular Function: endoribonuclease activity, producing 5'-phosphomonoesters (GO:0016891);; Molecular Function: DNA polymerase activity (GO:0034061);; Biological Process: DNA biosynthetic process (GO:0071897);; Biological Process: RNA phosphodiester bond hydrolysis (GO:0090501);;	--	--	putative polyprotein [Oryza sativa Japonica Group]
Os02g0793700	0.0125481	-1.49536	--	K17278|3.03903e-64|osa:4330990|probable steroid-binding protein 3	--	probable steroid-binding protein 3 [Oryza sativa Japonica Group]
Os03g0697833	0.000692271	1.39242	--	--	--	Os03g0697833 [Oryza sativa Japonica Group]
Os03g0563100	0.527623	-1.49379	Molecular Function: nucleotide binding (GO:0000166);; Molecular Function: oxidoreductase activity, acting on the CH-OH group of donors, oxygen as acceptor (GO:0016899);; Biological Process: single-organism metabolic process (GO:0044710);;	K00103|0|osa:4333257|L-gulonolactone oxidase 2	Ascorbate and aldarate metabolism (ko00053);; Biosynthesis of cofactors (ko01240)	L-gulonolactone oxidase 2 [Oryza sativa Japonica Group]
Os03g0136900	0.0698134	2.49321	--	K01681|0|osa:4331547|putative aconitate hydratase, cytoplasmic	Citrate cycle (TCA cycle) (ko00020);; Glyoxylate and dicarboxylate metabolism (ko00630);; Carbon metabolism (ko01200);; 2-Oxocarboxylic acid metabolism (ko01210);; Biosynthesis of amino acids (ko01230)	putative aconitate hydratase, cytoplasmic [Oryza sativa Japonica Group]
xxx_newGene_13619	0.191657	-0.498739	Cellular Component: chloroplast thylakoid (GO:0009534);; Biological Process: respiratory electron transport chain (GO:0022904);; Cellular Component: intrinsic component of membrane (GO:0031224);; Molecular Function: cofactor binding (GO:0048037);; Molecular Function: NADH dehydrogenase (quinone) activity (GO:0050136);; Biological Process: establishment of localization (GO:0051234);;	K05577|0|osa:3131400|ndhF, OrsajCp085; NADH dehydrogenase subunit 5	Oxidative phosphorylation (ko00190)	NADH dehydrogenase subunit 5 (chloroplast) [Oryza sativa f. spontanea]
Os02g0137800	0.030795	-0.907874	Molecular Function: binding (GO:0005488);; Biological Process: signal transduction (GO:0007165);; Cellular Component: extrinsic component of cytoplasmic side of plasma membrane (GO:0031234);;	--	--	unnamed protein product [Oryza sativa Japonica Group]
Os05g0437800	0.345342	-0.920824	--	--	--	Os05g0437800, partial [Oryza sativa Japonica Group]
Os11g0216000	0.141829	1.57672	Biological Process: pyruvate metabolic process (GO:0006090);; Biological Process: phosphate-containing compound metabolic process (GO:0006796);; Molecular Function: phosphotransferase activity, alcohol group as acceptor (GO:0016773);; Molecular Function: alkali metal ion binding (GO:0031420);;	K00873|0|osa:4350078|pyruvate kinase 1, cytosolic-like	Glycolysis / Gluconeogenesis (ko00010);; Purine metabolism (ko00230);; Pyruvate metabolism (ko00620);; Carbon metabolism (ko01200);; Biosynthesis of amino acids (ko01230);; Biosynthesis of cofactors (ko01240)	pyruvate kinase 1, cytosolic-like [Oryza sativa Japonica Group]
Os07g0533800	0.695622	0.528395	--	--	--	aspartic proteinase nepenthesin-1 [Oryza sativa Japonica Group]
Os06g0132400	0.188569	-1.04412	--	--	--	hypothetical protein OsJ_20009 [Oryza sativa Japonica Group]
Os08g0266300	0.24552	-0.753873	Cellular Component: extracellular region (GO:0005576);; Cellular Component: plastid envelope (GO:0009526);; Cellular Component: plastid stroma (GO:0009532);;	--	--	Os08g0266300 [Oryza sativa Japonica Group]
Os06g0152800	0.19357	-0.936241	--	--	--	uncharacterized protein LOC4340162 [Oryza sativa Japonica Group]
Os05g0576600	0.051396	2.84601	--	--	--	uncharacterized protein LOC4339695 [Oryza sativa Japonica Group]
Os03g0433733	0.747661	0.159807	Cellular Component: intracellular membrane-bounded organelle (GO:0043231);;	--	--	OO_Ba0005L10-OO_Ba0081K17.16 [Oryza officinalis]
Os06g0215000	0.214788	2.50738	--	--	--	uncharacterized protein LOC4340480 [Oryza sativa Japonica Group]
Os06g0130800	0.397904	0.322304	Cellular Component: chromatin (GO:0000785);; Molecular Function: nucleic acid binding (GO:0003676);; Biological Process: nucleosome organization (GO:0034728);; Cellular Component: intracellular membrane-bounded organelle (GO:0043231);;	K11275|3.52984e-43|osa:4340005|histone H1	--	hypothetical protein EE612_031720 [Oryza sativa]
Os02g0102900	0.0846908	1.35099	Biological Process: protein folding (GO:0006457);; Molecular Function: purine ribonucleoside binding (GO:0032550);; Cellular Component: intracellular membrane-bounded organelle (GO:0043231);;	K04077|0|osa:4327993|ruBisCO large subunit-binding protein subunit beta, chloroplastic	RNA degradation (ko03018)	ruBisCO large subunit-binding protein subunit beta, chloroplastic [Oryza sativa Japonica Group]
Os12g0102350	0.450693	0.557112	Molecular Function: nucleic acid binding transcription factor activity (GO:0001071);; Molecular Function: DNA binding (GO:0003677);; Biological Process: transcription, DNA-templated (GO:0006351);; Biological Process: protein metabolic process (GO:0019538);; Molecular Function: peptidase activity, acting on L-amino acid peptides (GO:0070011);;	--	--	unnamed protein product [Oryza sativa Japonica Group]
Os06g0274500	0.00748305	-1.3485	--	--	--	LRR receptor kinase SERL2 [Oryza sativa Japonica Group]
Os06g0319700	0.401971	1.01287	--	K02910|7.98812e-69|osa:4340887|60S ribosomal protein L31	Ribosome (ko03010)	60S ribosomal protein L31 [Oryza sativa Japonica Group]
Os11g0104300	2.02241e-05	-2.9752	Biological Process: macromolecule metabolic process (GO:0043170);; Cellular Component: intracellular membrane-bounded organelle (GO:0043231);;	--	--	protein DWARF 53 [Oryza sativa Japonica Group]
Os01g0814200	0.472163	1.27845	Molecular Function: catalytic activity (GO:0003824);; Biological Process: phosphatidylinositol metabolic process (GO:0046488);;	--	--	hypothetical protein OsI_04192 [Oryza sativa Indica Group]
Os07g0585000	0.624287	0.268594	--	--	--	hypothetical protein OsJ_24910 [Oryza sativa Japonica Group]
Os02g0743100	0.514582	0.485938	--	--	--	RING-H2 finger protein ATL46 [Oryza sativa Japonica Group]
Os01g0969000	0.0977507	1.02968	Cellular Component: intrinsic component of membrane (GO:0031224);;	--	--	uncharacterized protein LOC4323834 [Oryza sativa Japonica Group]
Os01g0734800	0.186924	-0.884153	--	--	--	anthocyanidin 5,3-O-glucosyltransferase [Oryza sativa Japonica Group]
Os04g0563000	0.896817	0.131565	Cellular Component: intrinsic component of membrane (GO:0031224);; Cellular Component: intracellular membrane-bounded organelle (GO:0043231);;	--	--	Os04g0563000, partial [Oryza sativa Japonica Group]
Os04g0592400	0.00926597	-1.38889	--	--	--	WEB family protein At5g16730, chloroplastic [Oryza sativa Japonica Group]
Os03g0755100	0.0025531	-1.31921	Cellular Component: plasma membrane (GO:0005886);; Biological Process: transport (GO:0006810);; Biological Process: response to metal ion (GO:0010038);; Molecular Function: P-P-bond-hydrolysis-driven transmembrane transporter activity (GO:0015405);; Molecular Function: nucleoside-triphosphatase activity (GO:0017111);; Cellular Component: intrinsic component of membrane (GO:0031224);; Molecular Fu…	--	--	RecName: Full=ABC transporter B family member 25; Short=ABC transporter ABCB.25; Short=OsABCB25; AltName: Full=Protein ALS1 homolog; AltName: Full=Protein ALUMINUM SENSITIVE 1; Short=OsALS1
Os03g0838900	0.0247668	-1.57219	Molecular Function: DNA binding (GO:0003677);; Biological Process: transcription, DNA-templated (GO:0006351);; Cellular Component: plastid (GO:0009536);;	--	--	uncharacterized protein LOC4334719 [Oryza sativa Japonica Group]
Os01g0891300	0.0293637	-1.11341	Molecular Function: alcohol dehydrogenase (NAD) activity (GO:0004022);; Molecular Function: hydrolase activity, hydrolyzing O-glycosyl compounds (GO:0004553);; Biological Process: reciprocal meiotic recombination (GO:0007131);; Cellular Component: plastid (GO:0009536);; Biological Process: single-organism metabolic process (GO:0044710);; Biological Process: external encapsulating structure organi…	--	--	probable rhamnogalacturonase B [Oryza sativa Japonica Group]
Os06g0155500	2.57214e-13	-3.68276	Molecular Function: transferase activity, transferring acyl groups (GO:0016746);;	--	--	putative elicitor inducible gene product EIG-I24 [Oryza sativa Indica Group]
Os05g0488500	0.487313	0.852301	--	--	--	uncharacterized protein At5g19025 [Oryza sativa Japonica Group]
Os03g0264000	0.332349	0.902407	--	--	--	ASC1-like protein 3 [Oryza sativa Japonica Group]
Os11g0602200	0.785935	0.143689	--	K11420|0|osa:4350865|histone-lysine N-methyltransferase, H3 lysine-9 specific SUVH1	Lysine degradation (ko00310)	histone-lysine N-methyltransferase, H3 lysine-9 specific SUVH1 [Oryza sativa Japonica Group]
Os03g0844450	0.0430896	0.857423	--	--	--	exosome complex component RRP41-like isoform X2 [Oryza sativa Japonica Group]
Os04g0477000	0.00722849	-1.78642	--	--	--	BTB/POZ domain-containing protein At1g67900 [Oryza sativa Japonica Group]
Os02g0101800	0.696743	0.300469	--	K10401|0|osa:4327984|kinesin-like protein KIF18A isoform X2	--	kinesin-like protein KIN-6 isoform X1 [Oryza sativa Japonica Group]
Os03g0808300	5.45285e-09	2.3948	--	--	--	remorin 4.1-like [Oryza sativa Japonica Group]
Os09g0438700	0.0584423	1.27656	--	K04078|1.75025e-143|osa:4347161|20 kDa chaperonin, chloroplastic	--	20 kDa chaperonin, chloroplastic [Oryza sativa Japonica Group]
Os10g0483500	4.9873e-05	-3.01932	--	K00279|0|osa:4348932|cytokinin dehydrogenase 3	Zeatin biosynthesis (ko00908)	cytokinin dehydrogenase 3 [Oryza sativa Japonica Group]
Os01g0225300	0.0900955	-0.765926	Cellular Component: intracellular membrane-bounded organelle (GO:0043231);;	--	--	Os01g0225300 [Oryza sativa Japonica Group]
Os08g0129900	0.188209	1.12925	Biological Process: protein transport (GO:0015031);; Cellular Component: BLOC complex (GO:0031082);;	--	--	Os08g0129900 [Oryza sativa Japonica Group]
Os02g0288200	0.861677	0.185662	--	--	--	neurofilament medium polypeptide [Oryza sativa Japonica Group]
Os05g0175800	0.873187	0.116198	Cellular Component: intrinsic component of membrane (GO:0031224);; Cellular Component: intracellular membrane-bounded organelle (GO:0043231);;	--	--	Os05g0175800 [Oryza sativa Japonica Group]
Os05g0357850	0.192688	1.14601	Cellular Component: intrinsic component of membrane (GO:0031224);;	--	--	Os05g0357850 [Oryza sativa Japonica Group]
Os02g0664300	0.508397	-0.301899	Molecular Function: endopeptidase activity (GO:0004175);; Molecular Function: exopeptidase activity (GO:0008238);; Biological Process: protein metabolic process (GO:0019538);; Cellular Component: intracellular membrane-bounded organelle (GO:0043231);;	K01280|0|osa:4330237|tripeptidyl-peptidase 2	--	tripeptidyl-peptidase 2 [Oryza sativa Japonica Group]
Os06g0720100	0.0562889	1.25131	Molecular Function: binding (GO:0005488);; Biological Process: transcription, DNA-templated (GO:0006351);;	K09338|0|obr:102704002|homeobox-leucine zipper protein HOX29	--	PREDICTED: homeobox-leucine zipper protein HOX29 [Oryza brachyantha]
Os12g0106525	0.452702	-0.690901	--	--	--	Nodulin-like family protein, expressed [Oryza sativa Japonica Group]
Os03g0859500	0.0152495	2.82483	--	--	--	ABC transporter G family member 3 isoform X2 [Oryza sativa Japonica Group]
Os07g0295200	0.939948	-0.0422345	Cellular Component: intracellular membrane-bounded organelle (GO:0043231);;	K09131|3.33118e-169|osa:4342960|UPF0235 protein At5g63440 isoform X1	--	UPF0235 protein At5g63440 isoform X1 [Oryza sativa Japonica Group]
Os04g0629600	0.00491792	1.69212	Molecular Function: nucleic acid binding (GO:0003676);; Biological Process: DNA metabolic process (GO:0006259);; Biological Process: programmed cell death (GO:0012501);; Molecular Function: purine ribonucleoside binding (GO:0032550);; Cellular Component: intracellular membrane-bounded organelle (GO:0043231);; Molecular Function: transition metal ion binding (GO:0046914);;	--	--	Os04g0629600 [Oryza sativa Japonica Group]
Os03g0418800	0.688291	0.221343	Molecular Function: small molecule binding (GO:0036094);; Cellular Component: cell part (GO:0044464);; Biological Process: establishment of localization (GO:0051234);; Molecular Function: organic cyclic compound binding (GO:0097159);;	--	--	Os03g0418800, partial [Oryza sativa Japonica Group]
Os01g0718500	0.0792603	6.00755	Cellular Component: intrinsic component of membrane (GO:0031224);;	--	--	unknown protein [Oryza sativa Japonica Group]
Os06g0320100	0.247491	0.809052	--	--	--	CDK5RAP3-like protein [Oryza sativa Japonica Group]
Os09g0299200	0.246088	-0.388659	Molecular Function: nucleic acid binding (GO:0003676);; Biological Process: transcription, DNA-templated (GO:0006351);; Cellular Component: intracellular membrane-bounded organelle (GO:0043231);;	--	--	Os09g0299200, partial [Oryza sativa Japonica Group]
Os09g0513500	0.0456699	-1.16569	--	K16223|3.56004e-80|osa:9268282|protein FLOWERING LOCUS T	Circadian rhythm - plant (ko04712)	protein FLOWERING LOCUS T isoform X2 [Oryza sativa Japonica Group]
Os10g0486600	0.386641	0.508198	--	K12859|3.16582e-100|zma:100282486|pco104916; uncharacterized protein LOC100282486	Spliceosome (ko03040)	hypothetical protein OsI_34094 [Oryza sativa Indica Group]
Os06g0728000	0.321206	-0.907149	Molecular Function: nucleic acid binding (GO:0003676);; Cellular Component: intracellular membrane-bounded organelle (GO:0043231);;	K10802|7.4815e-30|osa:4342129|DNA-binding protein MNB1B	Base excision repair (ko03410)	DNA-binding protein MNB1B [Oryza sativa Japonica Group]
Os02g0681900	0.000406019	-1.1785	--	--	--	scarecrow-like protein 8 [Oryza sativa Japonica Group]
Os05g0159100	0.246422	0.554617	--	--	--	Golgi apparatus membrane protein-like protein ECHIDNA isoform X2 [Oryza sativa Japonica Group]
Os05g0566900	0.688291	0.231047	--	--	--	uncharacterized protein LOC4339638 [Oryza sativa Japonica Group]
Os03g0107000	0.294661	0.652696	Biological Process: modification-dependent protein catabolic process (GO:0019941);;	--	--	Os03g0107000 [Oryza sativa Japonica Group]
Os10g0320201	0.000214734	-3.19318	--	K05280|2.94456e-145|osa:4348304|flavonoid 3'-monooxygenase	Flavonoid biosynthesis (ko00941);; Flavone and flavonol biosynthesis (ko00944)	flavonoid 3&apos;-monooxygenase CYP75B3-like [Oryza sativa Japonica Group]
Os07g0677100	0.486412	0.710101	Molecular Function: catalytic activity (GO:0003824);; Biological Process: response to stress (GO:0006950);; Molecular Function: antioxidant activity (GO:0016209);; Biological Process: hydrogen peroxide metabolic process (GO:0042743);; Molecular Function: cation binding (GO:0043169);; Biological Process: single-organism metabolic process (GO:0044710);; Molecular Function: tetrapyrrole binding (GO:…	K00430|0|osa:4344277|peroxidase 2-like	Phenylpropanoid biosynthesis (ko00940)	peroxidase 2-like [Oryza sativa Japonica Group]
Os01g0589800	0.344683	-0.69036	Cellular Component: intracellular membrane-bounded organelle (GO:0043231);;	--	--	light-harvesting complex-like protein OHP2, chloroplastic [Oryza sativa Japonica Group]
Os04g0165300	0.437157	0.610708	Cellular Component: intrinsic component of membrane (GO:0031224);;	--	--	ATG8-interacting protein 1 [Oryza sativa Japonica Group]
Os01g0179500	0.697112	0.393366	--	--	--	uncharacterized protein LOC4323879 [Oryza sativa Japonica Group]
Os03g0386000	0.046809	2.81312	--	--	--	WD-40 repeat family protein, putative, expressed [Oryza sativa Japonica Group]
Os03g0283300	0.779777	0.161344	Biological Process: mRNA export from nucleus (GO:0006406);; Cellular Component: intracellular membrane-bounded organelle (GO:0043231);;	K18732|2.84329e-65|osa:4332457|protein MODIFIER OF SNC1 11 isoform X1	--	protein MODIFIER OF SNC1 11 isoform X1 [Oryza sativa Japonica Group]
Os05g0307100	0.0790455	-1.5017	Biological Process: transport (GO:0006810);; Cellular Component: intrinsic component of membrane (GO:0031224);;	--	--	uncharacterized protein LOC9272544 isoform X1 [Oryza sativa Japonica Group]
Os05g0140500	0.559569	0.441553	Molecular Function: nucleic acid binding (GO:0003676);; Biological Process: gene expression (GO:0010467);; Molecular Function: small molecule binding (GO:0036094);; Cellular Component: intracellular membrane-bounded organelle (GO:0043231);;	K12876|2.73665e-90|osa:4337757|RNA-binding protein 8A	RNA transport (ko03013);; mRNA surveillance pathway (ko03015);; Spliceosome (ko03040)	RNA-binding protein Y14A [Oryza sativa Japonica Group]
Os09g0371000	0.323986	1.16508	Biological Process: transport (GO:0006810);; Cellular Component: intrinsic component of membrane (GO:0031224);;	--	--	uncharacterized protein LOC4346891 [Oryza sativa Japonica Group]
Os09g0552300	0.435118	0.784982	Molecular Function: protein kinase activity (GO:0004672);; Biological Process: cellular protein modification process (GO:0006464);; Biological Process: phosphate-containing compound metabolic process (GO:0006796);; Molecular Function: purine ribonucleoside binding (GO:0032550);;	K08832|0|osa:4347794|SRSF protein kinase 2	--	SRSF protein kinase 2 [Oryza sativa Japonica Group]
Os11g0488500	0.605034	-0.534114	Biological Process: DNA metabolic process (GO:0006259);; Molecular Function: oxidoreductase activity (GO:0016491);; Biological Process: single-organism metabolic process (GO:0044710);; Biological Process: xylan metabolic process (GO:0045491);;	--	--	Os11g0488500, partial [Oryza sativa Japonica Group]
Os05g0490300	0.655156	0.223709	--	--	--	Os05g0490300, partial [Oryza sativa Japonica Group]
Os04g0118700	0.0907411	-1.41859	Cellular Component: intracellular membrane-bounded organelle (GO:0043231);; Molecular Function: transition metal ion binding (GO:0046914);;	--	--	pentatricopeptide repeat-containing protein At3g57430, chloroplastic [Oryza sativa Japonica Group]
Os04g0349500	5.28451e-05	1.63981	--	K02995|3.46139e-135|osa:4335547|40S ribosomal protein S8-like	Ribosome (ko03010)	40S ribosomal protein S8-like [Oryza sativa Japonica Group]
Os01g0172000	0.421395	-0.954789	Molecular Function: transferase activity, transferring glycosyl groups (GO:0016757);; Cellular Component: intrinsic component of membrane (GO:0031224);; Cellular Component: intracellular membrane-bounded organelle (GO:0043231);;	K03845|7.50455e-109|osa:9266078|dol-P-Man:Man(5)GlcNAc(2)-PP-Dol alpha-1,3-mannosyltransferase	N-Glycan biosynthesis (ko00510);; Various types of N-glycan biosynthesis (ko00513)	hypothetical protein OsJ_00555 [Oryza sativa Japonica Group]
Os01g0105800	0.00231512	2.18905	--	K22063|1.60846e-76|osa:9272545|iron-sulfur assembly protein IscA-like 3, mitochondrial	--	iron-sulfur assembly protein IscA-like 3, mitochondrial [Oryza sativa Japonica Group]
Os04g0487200	0.529451	0.539407	Biological Process: cellular protein modification process (GO:0006464);; Biological Process: phosphate-containing compound metabolic process (GO:0006796);; Molecular Function: kinase activity (GO:0016301);; Cellular Component: intrinsic component of membrane (GO:0031224);; Molecular Function: purine ribonucleoside binding (GO:0032550);;	--	--	probable inactive receptor kinase At1g27190 [Oryza sativa Japonica Group]
Os10g0445400	0.665262	0.388183	Molecular Function: catalytic activity (GO:0003824);; Cellular Component: intracellular membrane-bounded organelle (GO:0043231);; Molecular Function: transition metal ion binding (GO:0046914);;	--	--	E3 ubiquitin-protein ligase AIRP2 isoform X1 [Oryza sativa Japonica Group]
Os06g0710800	0.000492289	1.53015	--	--	--	pentatricopeptide repeat-containing protein At5g42310, chloroplastic [Oryza sativa Japonica Group]
Os04g0448000	0.352593	-0.951231	Cellular Component: intrinsic component of membrane (GO:0031224);;	--	--	Os04g0448000 [Oryza sativa Japonica Group]
Os07g0190000	0.0137701	-3.05517	Biological Process: terpenoid metabolic process (GO:0006721);; Biological Process: thiamine metabolic process (GO:0006772);; Cellular Component: plastid (GO:0009536);; Molecular Function: transferase activity, transferring aldehyde or ketonic groups (GO:0016744);; Molecular Function: cation binding (GO:0043169);; Biological Process: 1-deoxy-D-xylulose 5-phosphate metabolic process (GO:0052863);;	K01662|0|osa:4342614|probable 1-deoxy-D-xylulose-5-phosphate synthase 2, chloroplastic	Thiamine metabolism (ko00730);; Terpenoid backbone biosynthesis (ko00900)	probable 1-deoxy-D-xylulose-5-phosphate synthase 2, chloroplastic [Oryza sativa Japonica Group]
Os05g0490100	0.00736181	2.14184	--	K02908|5.57268e-75|osa:4339162|60S ribosomal protein L30	Ribosome (ko03010)	60S ribosomal protein L30 [Oryza sativa Japonica Group]
Os12g0105200	0.0159226	1.19264	--	--	--	Os12g0105200, partial [Oryza sativa Japonica Group]
Os08g0165901	0.102929	-1.11993	Cellular Component: intracellular membrane-bounded organelle (GO:0043231);;	--	--	Os08g0166000 [Oryza sativa Japonica Group]
Os01g0506100	0.0455276	1.12394	Cellular Component: cytoplasm (GO:0005737);; Biological Process: abscisic acid-activated signaling pathway (GO:0009738);; Biological Process: seed germination (GO:0009845);; Cellular Component: intracellular membrane-bounded organelle (GO:0043231);;	--	--	pentatricopeptide repeat-containing protein At5g11310, mitochondrial [Oryza sativa Japonica Group]
Os02g0173900	0.0505604	1.93791	--	--	--	Os02g0173900 [Oryza sativa Japonica Group]
Os02g0565400	0.123803	0.703526	Cellular Component: intracellular membrane-bounded organelle (GO:0043231);;	--	--	pentatricopeptide repeat-containing protein At1g09900 [Oryza sativa Japonica Group]
Os11g0572700	0.436436	-0.498868	Biological Process: plastid organization (GO:0009657);; Biological Process: tetraterpenoid biosynthetic process (GO:0016109);; Molecular Function: cis-trans isomerase activity (GO:0016859);;	K09835|0|osa:4350758|prolycopene isomerase 1, chloroplastic	Carotenoid biosynthesis (ko00906)	prolycopene isomerase 1, chloroplastic [Oryza sativa Japonica Group]
Os07g0123900	0.000692271	2.0689	Cellular Component: membrane (GO:0016020);;	--	--	transcription factor Maf [Oryza sativa Japonica Group]
Os02g0602400	0.815026	-0.196734	Biological Process: response to acid chemical (GO:0001101);; Molecular Function: DNA binding (GO:0003677);; Biological Process: transcription, DNA-templated (GO:0006351);; Biological Process: response to osmotic stress (GO:0006970);; Biological Process: plastid organization (GO:0009657);; Cellular Component: intracellular membrane-bounded organelle (GO:0043231);;	K15032|0|osa:4329901|uncharacterized protein LOC4329901	--	hypothetical protein OsJ_07418 [Oryza sativa Japonica Group]
Os05g0271300	0.281152	0.664179	--	--	--	ribonuclease 3-like protein 2 isoform X3 [Oryza sativa Japonica Group]
Os04g0393300	0.481671	0.405331	Cellular Component: membrane (GO:0016020);;	--	--	unnamed protein product [Oryza sativa Japonica Group]
Os06g0692700	0.00260521	2.49598	Molecular Function: protein kinase activity (GO:0004672);; Biological Process: cellular protein modification process (GO:0006464);; Biological Process: phosphate-containing compound metabolic process (GO:0006796);; Cellular Component: intrinsic component of membrane (GO:0031224);; Molecular Function: purine ribonucleoside binding (GO:0032550);; Cellular Component: intracellular membrane-bounded o…	--	--	hypothetical protein OsJ_22461 [Oryza sativa Japonica Group]
Os12g0560400	0.147726	-0.872399	--	K03017|1.96506e-71|osa:4352511|DNA-directed RNA polymerases II, IV and V subunit 9B	RNA polymerase (ko03020)	DNA-directed RNA polymerases II, IV and V subunit 9B [Oryza sativa Japonica Group]
Os03g0240500	0.340314	0.437482	Molecular Function: catalytic activity (GO:0003824);; Molecular Function: protein transmembrane transporter activity (GO:0008320);; Cellular Component: plastid outer membrane (GO:0009527);; Biological Process: protein transport (GO:0015031);; Cellular Component: intrinsic component of membrane (GO:0031224);; Molecular Function: purine ribonucleoside binding (GO:0032550);;	--	--	hypothetical protein OsI_10695 [Oryza sativa Indica Group]
Os01g0232800	0.551317	0.337595	Cellular Component: intrinsic component of membrane (GO:0031224);;	--	--	glycosyltransferase-like KOBITO 1 [Oryza sativa Japonica Group]
Os07g0644600	0.0392908	0.928684	--	--	--	probable cytochrome P450 313a3 [Oryza sativa Japonica Group]
Os02g0200900	0.00917565	-0.753509	--	K14515|0|osa:4328647|EIN3-binding F-box protein 1 isoform X1	MAPK signaling pathway - plant (ko04016);; Plant hormone signal transduction (ko04075)	EIN3-binding F-box protein 1 [Oryza sativa Japonica Group]
Os09g0449600	0.00701446	1.19525	Biological Process: protein modification by small protein conjugation (GO:0032446);; Cellular Component: intracellular membrane-bounded organelle (GO:0043231);;	--	--	hypothetical protein OsJ_29581 [Oryza sativa Japonica Group]
Os02g0556400	0.0396321	1.07625	Biological Process: tRNA processing (GO:0008033);; Molecular Function: transferase activity, transferring one-carbon groups (GO:0016741);; Molecular Function: organic cyclic compound binding (GO:0097159);; Biological Process: guanosine-containing compound metabolic process (GO:1901068);;	K15430|0|osa:4329664|tRNA (guanine(10)-N2)-methyltransferase homolog	--	tRNA (guanine(10)-N2)-methyltransferase homolog [Oryza sativa Japonica Group]
Os02g0823300	0.258175	0.731461	--	--	--	uncharacterized protein LOC4331196 [Oryza sativa Japonica Group]
Os09g0249600	0.305024	0.551566	Biological Process: RNA splicing, via transesterification reactions with bulged adenosine as nucleophile (GO:0000377);; Cellular Component: spliceosomal tri-snRNP complex (GO:0097526);;	--	--	protein RDM16 isoform X1 [Oryza sativa Japonica Group]
Os09g0553250	0.287774	-0.616706	Biological Process: phosphorus metabolic process (GO:0006793);; Molecular Function: UTP-monosaccharide-1-phosphate uridylyltransferase activity (GO:0051748);;	K00963|2.13427e-77|dct:110093903|UTP--glucose-1-phosphate uridylyltransferase	Pentose and glucuronate interconversions (ko00040);; Galactose metabolism (ko00052);; Starch and sucrose metabolism (ko00500);; Amino sugar and nucleotide sugar metabolism (ko00520);; Biosynthesis of cofactors (ko01240)	unknown [Zea mays]
Os12g0105850	0.322452	0.787864	Molecular Function: protein kinase activity (GO:0004672);; Biological Process: protein phosphorylation (GO:0006468);; Cellular Component: intrinsic component of membrane (GO:0031224);; Molecular Function: purine ribonucleoside binding (GO:0032550);;	--	--	protein MALE DISCOVERER 2 [Oryza sativa Japonica Group]
Os03g0852200	0.792056	0.129962	Cellular Component: intrinsic component of membrane (GO:0031224);; Cellular Component: intracellular membrane-bounded organelle (GO:0043231);; Molecular Function: protein dimerization activity (GO:0046983);;	K13989|2.70849e-170|osa:4334809|derlin-2	Protein processing in endoplasmic reticulum (ko04141)	derlin-2 [Oryza sativa Japonica Group]
Os02g0474700	0.648511	0.23286	Cellular Component: intracellular (GO:0005622);; Biological Process: protein transport (GO:0015031);; Molecular Function: Ras GTPase binding (GO:0017016);;	--	--	putative Importin 7&lt;Ran-binding protein 7 [Oryza sativa Japonica Group]
Os04g0408600	0.55339	0.483372	--	--	--	uncharacterized protein LOC4335760 [Oryza sativa Japonica Group]
Os03g0756000	0.00148431	1.31823	--	K02872|9.71742e-136|osa:4334154|60S ribosomal protein L13a-4	Ribosome (ko03010)	60S ribosomal protein L13a-4 [Oryza sativa Japonica Group]
Os01g0659200	0.244236	0.818077	Molecular Function: hydrogen ion transmembrane transporter activity (GO:0015078);; Biological Process: energy coupled proton transmembrane transport, against electrochemical gradient (GO:0015988);; Cellular Component: proton-transporting two-sector ATPase complex (GO:0016469);;	K02150|1.57286e-147|osa:4327166|V-type proton ATPase subunit E	Oxidative phosphorylation (ko00190);; Phagosome (ko04145)	V-type proton ATPase subunit E [Oryza sativa Japonica Group]
Os04g0487100	0.720342	0.318008	--	--	--	hypothetical protein OsJ_15258 [Oryza sativa Japonica Group]
Os05g0490400	0.367946	-0.564586	Cellular Component: intrinsic component of membrane (GO:0031224);;	--	--	uncharacterized protein LOC4339165 [Oryza sativa Japonica Group]
Os02g0266800	0.839717	0.115467	Molecular Function: nucleic acid binding transcription factor activity (GO:0001071);; Molecular Function: DNA binding (GO:0003677);; Biological Process: transcription, DNA-templated (GO:0006351);;	--	--	bZIP transcription factor RISBZ3-like isoform X1 [Oryza sativa Japonica Group]
Os10g0101200	0.00316912	-0.995947	--	K16296|0|osa:4347942|serine carboxypeptidase-like 2	--	serine carboxypeptidase-like 2 [Oryza sativa Japonica Group]
Os03g0393900	0.292381	0.531013	--	--	--	patatin-like protein 1 [Oryza sativa Japonica Group]
Os01g0132500	0.499521	1.09548	Cellular Component: intracellular membrane-bounded organelle (GO:0043231);;	--	--	uncharacterized protein LOC4325799 [Oryza sativa Japonica Group]
xxx_newGene_8260	0.345197	1.06919	Molecular Function: nucleic acid binding (GO:0003676);; Molecular Function: endoribonuclease activity, producing 5'-phosphomonoesters (GO:0016891);; Molecular Function: DNA polymerase activity (GO:0034061);; Cellular Component: intracellular membrane-bounded organelle (GO:0043231);; Biological Process: DNA biosynthetic process (GO:0071897);; Biological Process: RNA phosphodiester bond hydrolysis …	--	--	H0510A06.14 [Oryza sativa]
Os12g0124500	0.541437	0.486391	Molecular Function: cation binding (GO:0043169);; Cellular Component: intracellular part (GO:0044424);;	--	--	ZF-HD protein dimerisation region containing protein [Oryza sativa Japonica Group]
Os05g0529000	0.26039	1.24778	Cellular Component: intrinsic component of membrane (GO:0031224);;	--	--	protein LIKE COV 1 [Oryza sativa Japonica Group]
Os07g0680900	0.544832	0.724313	--	K04688|0|osa:4344299|serine/threonine-protein kinase AtPK2/AtPK19	--	serine/threonine-protein kinase AtPK2/AtPK19 [Oryza sativa Japonica Group]
Os08g0467600	0.103446	1.31522	Cellular Component: intracellular membrane-bounded organelle (GO:0043231);;	--	--	putative storekeeper protein [Oryza sativa Japonica Group]
Os01g0763600	0.841829	0.130519	--	K01126|0|osa:4327034|glycerophosphodiester phosphodiesterase GDPD6	Glycerophospholipid metabolism (ko00564)	glycerophosphodiester phosphodiesterase GDPD6 [Oryza sativa Japonica Group]
Os10g0162100	3.92436e-06	-3.11431	--	--	--	expressed protein [Oryza sativa Japonica Group]
Os08g0170800	0.455392	0.395337	Molecular Function: purine ribonucleoside binding (GO:0032550);;	--	--	disease resistance protein RGA5-like isoform X3 [Oryza sativa Japonica Group]
Os01g0618900	0.319618	-0.99006	--	--	--	probable polygalacturonase [Oryza sativa Japonica Group]
[truncated: 8,610 more rows]
