# Supplementary material for: Research on lncRNA related to drought resistance of Shanlan upland rice
Source: BMC Genomics. 2022 Apr 30;23:336. doi: 10.1186/s12864-022-08546-0 (PMC9055766; doi:10.1186/s12864-022-08546-0)
Supplement: Supplementary file 8 — Additional file 8: Table S008. Function annotion of miRNAs target gene. [file 12864_2022_8546_MOESM8_ESM.xlsx]

## Sheet: CK1_CK2_CK3_vs_D1_D2_D3.annotat
Table S008. Function annotion of miRNAs target gene
#ID	FDR	FC	regulated	GO_annotation	KEGG_annotation	Nr_annotation
Os07g0496300	0.029319	-4.7326	down	Biological Process: transcription, DNA-templated (GO:0006351);; Molecular Function: transition metal ion binding (GO:0046914);;	--	protein FAR1-RELATED SEQUENCE 5 [Oryza sativa Japonica Group]
Os08g0127800	0.0327501	-1.30477	down	Cellular Component: intracellular membrane-bounded organelle (GO:0043231);;	--	uncharacterized protein LOC4344573 [Oryza sativa Japonica Group]
Os04g0436900	0.0330586	-1.14032	down	--	--	Os04g0436900 [Oryza sativa Japonica Group]
Os12g0601300	0.000756358	2.38544	up	Biological Process: transcription, DNA-templated (GO:0006351);; Biological Process: hormone-mediated signaling pathway (GO:0009755);; Cellular Component: intracellular membrane-bounded organelle (GO:0043231);;	K14484|1.52387e-111|osa:4352721|auxin-responsive protein IAA30	auxin-responsive protein IAA30 [Oryza sativa Japonica Group]
Os03g0835800	0.0327062	-2.43442	down	--	--	putative transcription factor [Oryza sativa Japonica Group]
Os03g0271500	0.0304813	1.87352	up	Cellular Component: chloroplast thylakoid (GO:0009534);; Cellular Component: intrinsic component of membrane (GO:0031224);;	--	uncharacterized protein LOC4332392 [Oryza sativa Japonica Group]
Os12g0209502	0.0330586	-1.14032	down	--	--	Os12g0209502 [Oryza sativa Japonica Group]
Os04g0493300	0.029319	-4.7326	down	Cellular Component: intrinsic component of membrane (GO:0031224);; Cellular Component: intracellular membrane-bounded organelle (GO:0043231);;	--	uncharacterized protein LOC4336262 [Oryza sativa Japonica Group]
Os02g0613300	0.029319	-4.7326	down	--	--	F-box/LRR-repeat protein 14 [Oryza sativa Japonica Group]
Os08g0332150	0.0264601	1.02974	up	Cellular Component: intracellular membrane-bounded organelle (GO:0043231);;	--	Os01g0561500 [Oryza sativa Japonica Group]
Os03g0229575	0.029319	-4.7326	down	--	--	Os03g0229575 [Oryza sativa Japonica Group]
Os03g0366350	0.0319595	2.45777	up	--	--	F-box protein At1g47340 isoform X1 [Oryza sativa Japonica Group]
Os09g0324200	0.00173739	-2.23078	down	--	--	uncharacterized protein LOC4346729 [Oryza sativa Japonica Group]
Os04g0195400	0.0468699	1.16406	up	--	--	Os06g0661000, partial [Oryza sativa Japonica Group]
Os06g0104300	0.0327501	-1.30477	down	--	--	monocopper oxidase-like protein SKU5 [Oryza sativa Japonica Group]
Os10g0372800	0.0327062	-2.43442	down	--	--	Os10g0372800, partial [Oryza sativa Japonica Group]
Os02g0466050	0.029319	-4.7326	down	Cellular Component: intracellular membrane-bounded organelle (GO:0043231);; Molecular Function: organic cyclic compound binding (GO:0097159);;	--	hypothetical protein LOC_Os12g15480 [Oryza sativa Japonica Group]
Os05g0102800	0.0191364	-2.57341	down	Molecular Function: nucleic acid binding (GO:0003676);; Molecular Function: catalytic activity (GO:0003824);; Molecular Function: small molecule binding (GO:0036094);; Molecular Function: cation binding (GO:0043169);;	--	protein MEI2-like 3 isoform X1 [Oryza sativa Japonica Group]
Os02g0176000	0.00408516	-2.02382	down	Cellular Component: cell part (GO:0044464);; Molecular Function: transition metal ion binding (GO:0046914);;	--	B-box zinc finger protein 32 [Oryza sativa Japonica Group]
Os05g0109650	0.00408516	-2.02382	down	Molecular Function: nucleic acid binding (GO:0003676);;	--	pumilio homolog 1 [Oryza sativa Japonica Group]
Os01g0925100	0.0191364	-2.57341	down	Biological Process: programmed cell death (GO:0012501);; Molecular Function: purine ribonucleoside binding (GO:0032550);;	--	Os01g0925100 [Oryza sativa Japonica Group]
Os10g0551200	0.0319595	2.45777	up	--	--	putative Scl1 protein [Oryza sativa Japonica Group]
Os06g0167500	0.0446808	-1.61499	down	--	--	probable LRR receptor-like serine/threonine-protein kinase At1g56130 isoform X1 [Oryza sativa Japonica Group]
Os01g0199300	0.00408516	-2.02382	down	--	--	uncharacterized protein LOC107277551 [Oryza sativa Japonica Group]
Os11g0202900	0.00408516	-2.02382	down	--	--	Os11g0203000 [Oryza sativa Japonica Group]
Os03g0683866	0.0264601	1.02974	up	--	K10588|0|osa:4333737|E3 ubiquitin-protein ligase UPL7 isoform X1	E3 ubiquitin-protein ligase UPL7 [Oryza sativa Japonica Group]
Os02g0156100	0.0304813	1.87352	up	Cellular Component: intrinsic component of membrane (GO:0031224);;	--	hypothetical protein OsI_05913 [Oryza sativa Indica Group]
Os01g0871350	0.0446808	-1.61499	down	--	--	Os01g0871350, partial [Oryza sativa Japonica Group]
Os01g0100200	0.00408516	-2.02382	down	Molecular Function: oxidoreductase activity (GO:0016491);; Cellular Component: intracellular membrane-bounded organelle (GO:0043231);; Biological Process: single-organism metabolic process (GO:0044710);; Molecular Function: tetrapyrrole binding (GO:0046906);; Molecular Function: transition metal ion binding (GO:0046914);;	--	Os01g0100300, partial [Oryza sativa Japonica Group]
Os10g0559800	0.0468699	1.16406	up	--	--	uncharacterized protein LOC4349372 isoform X2 [Oryza sativa Japonica Group]
Os03g0325500	0.0327062	-2.43442	down	--	--	hypothetical protein OsI_11384 [Oryza sativa Indica Group]
Os11g0455800	0.0304813	1.87352	up	Biological Process: one-carbon metabolic process (GO:0006730);; Biological Process: serine family amino acid metabolic process (GO:0009069);; Molecular Function: hydroxymethyl-, formyl- and related transferase activity (GO:0016742);; Molecular Function: anion binding (GO:0043168);;	K00600|0|osa:4350456|serine hydroxymethyltransferase 4	serine hydroxymethyltransferase 4 [Oryza sativa Japonica Group]
Os11g0707900	0.0327501	-1.30477	down	--	--	Os11g0707900, partial [Oryza sativa Japonica Group]
Os08g0399900	0.0327501	-1.30477	down	--	K11420|3.46955e-110|osa:4345507|uncharacterized protein LOC4345507	uncharacterized protein LOC4345507 [Oryza sativa Japonica Group]
Os09g0433000	0.0248093	-1.97024	down	Biological Process: cellular protein modification process (GO:0006464);; Molecular Function: transferase activity, transferring hexosyl groups (GO:0016758);; Cellular Component: intrinsic component of membrane (GO:0031224);; Cellular Component: Golgi apparatus part (GO:0044431);;	--	beta-1,3-galactosyltransferase pvg3 [Oryza sativa Japonica Group]
Os03g0393300	0.0327501	-1.30477	down	--	--	Os03g0393300 [Oryza sativa Japonica Group]
Os02g0551100	0.0357617	1.315	up	--	K14498|0|osa:4329630|serine/threonine-protein kinase SAPK6	serine/threonine-protein kinase SAPK6 [Oryza sativa Japonica Group]
Os03g0639700	0.00173739	-2.23078	down	--	--	Os03g0639700, partial [Oryza sativa Japonica Group]
Os01g0136100	0.00408516	-2.02382	down	Biological Process: protein complex assembly (GO:0006461);; Biological Process: response to stress (GO:0006950);; Cellular Component: intracellular part (GO:0044424);;	K13993|2.76945e-77|osa:4325697|16.9 kDa class I heat shock protein 1	16.9 kDa class I heat shock protein 1 [Oryza sativa Japonica Group]
Os11g0680200	0.00173739	-2.23078	down	--	--	Os11g0680200 [Oryza sativa Japonica Group]
Os03g0858400	0.00408516	-2.02382	down	Cellular Component: intrinsic component of membrane (GO:0031224);; Cellular Component: intracellular membrane-bounded organelle (GO:0043231);;	K23325|0|osa:4334851|transducin beta-like protein 2	hypothetical protein OsI_14418 [Oryza sativa Indica Group]
Os08g0532600	0.00408516	-2.02382	down	Molecular Function: catalytic activity (GO:0003824);; Biological Process: response to stress (GO:0006950);; Molecular Function: antioxidant activity (GO:0016209);; Cellular Component: intrinsic component of membrane (GO:0031224);; Biological Process: hydrogen peroxide metabolic process (GO:0042743);; Molecular Function: cation binding (GO:0043169);; Biological Process: single-organism metabolic p…	K00430|3.665e-128|osa:4346141|peroxidase 55	peroxidase 55 [Oryza sativa Japonica Group]
Os05g0255800	0.029319	-4.7326	down	Molecular Function: nucleic acid binding (GO:0003676);; Molecular Function: protein binding (GO:0005515);; Biological Process: transcription, DNA-templated (GO:0006351);; Cellular Component: intrinsic component of membrane (GO:0031224);; Cellular Component: intracellular membrane-bounded organelle (GO:0043231);;	--	Os05g0255800, partial [Oryza sativa Japonica Group]
Os05g0129000	0.0468699	1.16406	up	Biological Process: glutathione metabolic process (GO:0006749);; Cellular Component: plastid stroma (GO:0009532);; Biological Process: response to fungus (GO:0009620);; Biological Process: response to metal ion (GO:0010038);; Molecular Function: acid-amino acid ligase activity (GO:0016881);; Biological Process: glycosinolate biosynthetic process (GO:0019758);; Molecular Function: purine ribonucle…	K01919|0|osa:4337696|glutamate--cysteine ligase A, chloroplastic	hypothetical protein OsJ_16990 [Oryza sativa Japonica Group]
Os12g0226500	0.0191364	-2.57341	down	Molecular Function: catalytic activity (GO:0003824);; Biological Process: single-organism metabolic process (GO:0044710);; Molecular Function: transition metal ion binding (GO:0046914);;	--	hypothetical protein OsJ_35615 [Oryza sativa Japonica Group]
Os07g0214100	0.00408516	-2.02382	down	Molecular Function: endopeptidase inhibitor activity (GO:0004866);; Biological Process: response to stress (GO:0006950);; Biological Process: negative regulation of peptidase activity (GO:0010466);; Cellular Component: intracellular membrane-bounded organelle (GO:0043231);; Cellular Component: extracellular region part (GO:0044421);;	--	seed allergenic protein RAG1 [Oryza sativa Japonica Group]
Os12g0234000	0.029319	-4.7326	down	--	--	Os12g0234100 [Oryza sativa Japonica Group]
Os06g0534800	0.00408516	-2.02382	down	--	--	E3 ubiquitin-protein ligase EL5-like [Oryza sativa Japonica Group]
Os01g0707500	0.0327062	-2.43442	down	Molecular Function: protein binding (GO:0005515);; Cellular Component: intracellular membrane-bounded organelle (GO:0043231);;	--	transcription factor LATE FLOWERING-like [Oryza sativa Japonica Group]
Os08g0398400	0.00173739	-2.23078	down	--	--	hypersensitive-induced response protein 1 [Oryza sativa Japonica Group]
Os12g0620733	0.0248093	-1.97024	down	Cellular Component: intracellular membrane-bounded organelle (GO:0043231);;	--	uncharacterized protein LOC4352816 isoform X1 [Oryza sativa Japonica Group]
Os05g0269500	0.00567533	-1.538	down	Biological Process: fertilization (GO:0009566);; Cellular Component: intrinsic component of membrane (GO:0031224);;	--	protein HAPLESS 2-A [Oryza sativa Japonica Group]
Os09g0466201	0.0327501	-1.30477	down	--	K18810|1.0789e-47|osa:4347313|cyclin-D4-1	cyclin-D4-1 [Panicum miliaceum]
Os08g0453700	0.0357617	1.315	up	Molecular Function: antioxidant activity (GO:0016209);; Molecular Function: oxidoreductase activity, acting on NAD(P)H (GO:0016651);; Cellular Component: intrinsic component of membrane (GO:0031224);; Cellular Component: intracellular membrane-bounded organelle (GO:0043231);; Biological Process: single-organism metabolic process (GO:0044710);; Molecular Function: metal ion binding (GO:0046872);; …	--	Os08g0453700 [Oryza sativa Japonica Group]
Os09g0471400	0.0191364	-2.57341	down	--	--	hypothetical protein EE612_048448, partial [Oryza sativa]
Os02g0770500	0.00408516	-2.02382	down	Molecular Function: regulatory region DNA binding (GO:0000975);; Molecular Function: nucleic acid binding transcription factor activity (GO:0001071);; Biological Process: transcription, DNA-templated (GO:0006351);;	--	Os02g0770500 [Oryza sativa Japonica Group]
Os03g0578900	0.0264601	1.02974	up	Molecular Function: nucleic acid binding (GO:0003676);; Cellular Component: intracellular membrane-bounded organelle (GO:0043231);;	--	Os03g0578900, partial [Oryza sativa Japonica Group]
Os02g0103600	0.0357617	1.315	up	Molecular Function: transporter activity (GO:0005215);; Biological Process: transport (GO:0006810);; Cellular Component: intrinsic component of membrane (GO:0031224);;	--	putative nodulin MtN21 [Oryza sativa Japonica Group]
Os12g0233400	0.000756358	2.38544	up	Biological Process: transcription, DNA-templated (GO:0006351);; Cellular Component: intrinsic component of membrane (GO:0031224);; Molecular Function: cation binding (GO:0043169);;	--	hypothetical protein OsI_37889 [Oryza sativa Indica Group]
Os11g0440422	0.0468699	1.16406	up	Molecular Function: protein binding (GO:0005515);; Cellular Component: intracellular membrane-bounded organelle (GO:0043231);;	--	Os11g0440422 [Oryza sativa Japonica Group]
Os02g0317600	0.00567533	-1.538	down	Cellular Component: intracellular membrane-bounded organelle (GO:0043231);;	--	Os02g0317600 [Oryza sativa Japonica Group]
Os07g0294100	0.00173739	-2.23078	down	Molecular Function: purine ribonucleoside binding (GO:0032550);;	--	Os07g0294100 [Oryza sativa Japonica Group]
Os08g0558900	0.0327501	-1.30477	down	Molecular Function: enzyme inhibitor activity (GO:0004857);; Cellular Component: intracellular membrane-bounded organelle (GO:0043231);; Biological Process: regulation of ATPase activity (GO:0043462);;	--	uncharacterized protein LOC4346312 isoform X2 [Oryza sativa Japonica Group]
Os02g0681900	0.00408516	-2.02382	down	--	--	scarecrow-like protein 8 [Oryza sativa Japonica Group]
Os11g0606001	0.0174232	1.36286	up	--	--	hypothetical protein OsJ_11780 [Oryza sativa Japonica Group]
Os08g0396700	0.00408516	-2.02382	down	--	--	hypothetical protein OsJ_27201 [Oryza sativa Japonica Group]
Os02g0641300	0.00408516	-2.02382	down	Molecular Function: nucleic acid binding (GO:0003676);;	K09422|2.05758e-120|osa:4330115|transcription factor MYB21	transcription factor MYB21 [Oryza sativa Japonica Group]
Os04g0600900	0.00173739	-2.23078	down	Biological Process: transcription, DNA-templated (GO:0006351);; Molecular Function: purine ribonucleoside binding (GO:0032550);; Cellular Component: intracellular membrane-bounded organelle (GO:0043231);;	--	growth-regulating factor 3 isoform X3 [Oryza sativa Japonica Group]
Os12g0605100	0.00408516	-2.02382	down	Molecular Function: cytoskeletal protein binding (GO:0008092);;	--	Os12g0605100, partial [Oryza sativa Japonica Group]
Os11g0194050	0.0248093	-1.97024	down	Cellular Component: external encapsulating structure (GO:0030312);; Biological Process: negative regulation of molecular function (GO:0044092);; Molecular Function: carboxylic ester hydrolase activity (GO:0052689);; Biological Process: cell wall organization (GO:0071555);;	--	retrotransposon protein, putative, unclassified [Oryza sativa Japonica Group]
Os03g0800200	0.0264601	1.02974	up	Molecular Function: RNA binding (GO:0003723);; Biological Process: meiotic cell cycle (GO:0007126);; Biological Process: embryo sac development (GO:0009553);; Biological Process: pollen development (GO:0009555);; Biological Process: gene silencing (GO:0016458);; Cellular Component: nucleolar chromatin (GO:0030874);; Biological Process: histone lysine demethylation (GO:0070076);;	K11593|0|osa:4334449|protein argonaute MEL1	protein argonaute MEL1 [Oryza sativa Japonica Group]
Os04g0115200	0.0327062	-2.43442	down	Cellular Component: intrinsic component of membrane (GO:0031224);; Cellular Component: intracellular membrane-bounded organelle (GO:0043231);;	--	uncharacterized protein LOC4334942 [Oryza sativa Japonica Group]
Os08g0564200	0.0327062	-2.43442	down	Molecular Function: nucleoside-triphosphatase activity (GO:0017111);; Molecular Function: purine ribonucleoside binding (GO:0032550);; Cellular Component: intracellular membrane-bounded organelle (GO:0043231);;	K06185|0|osa:4346343|ABC transporter F family member 1	ABC transporter F family member 1 [Oryza sativa Japonica Group]
Os05g0512200	0.029319	-4.7326	down	Cellular Component: intracellular membrane-bounded organelle (GO:0043231);;	--	uncharacterized protein LOC4339294 [Oryza sativa Japonica Group]
Os09g0309700	0.0327062	-2.43442	down	Molecular Function: nucleic acid binding transcription factor activity (GO:0001071);; Molecular Function: nucleic acid binding (GO:0003676);; Biological Process: transcription, DNA-templated (GO:0006351);; Cellular Component: intracellular membrane-bounded organelle (GO:0043231);;	--	ethylene-responsive transcription factor ERF117 [Oryza sativa Japonica Group]
Os04g0486800	0.0191364	-2.57341	down	--	K10730|0|osa:4336217|ATP-dependent DNA helicase Q-like 5	ATP-dependent DNA helicase Q-like 5 [Oryza sativa Japonica Group]
Os06g0605600	0.0264601	1.02974	up	Molecular Function: nucleic acid binding (GO:0003676);; Cellular Component: intracellular membrane-bounded organelle (GO:0043231);;	K09422|0|osa:4341475|transcription factor GAMYB	GAMYB-like1 [Oryza sativa Japonica Group]
Os09g0513900	0.0319595	2.45777	up	--	--	Os09g0513900, partial [Oryza sativa Japonica Group]
Os07g0101800	0.0327501	-1.30477	down	--	--	Os07g0101800 [Oryza sativa Japonica Group]
Os10g0104500	0.00408516	-2.02382	down	Molecular Function: protein kinase activity (GO:0004672);; Biological Process: cellular protein modification process (GO:0006464);; Biological Process: ribonucleoprotein complex biogenesis (GO:0022613);; Cellular Component: nuclear lumen (GO:0031981);; Molecular Function: purine ribonucleoside binding (GO:0032550);; Biological Process: gametophyte development (GO:0048229);;	K14855|0|osa:4347950|notchless protein homolog	notchless protein homolog [Oryza sativa Japonica Group]
Os06g0695700	0.00408516	-2.02382	down	Molecular Function: protein binding (GO:0005515);; Cellular Component: intracellular membrane-bounded organelle (GO:0043231);;	--	proteoglycan 4 [Oryza sativa Japonica Group]
Os05g0333600	0.0327062	-2.43442	down	--	--	hypothetical protein EE612_028723 [Oryza sativa]
Os03g0225900	0.00408516	-2.02382	down	--	K01723|0|osa:4332121|allene oxide synthase 2	allene oxide synthase 2 [Oryza sativa Japonica Group]
Os12g0286200	0.00408516	-2.02382	down	--	--	uncharacterized protein LOC107278287 isoform X2 [Oryza sativa Japonica Group]
Os03g0156600	0.00173739	-2.23078	down	--	--	heavy metal-associated isoprenylated plant protein 27 [Oryza sativa Japonica Group]
Os02g0805800	0.00408516	-2.02382	down	--	K08869|0|osa:4331068|uncharacterized protein slr1919 isoform X1	Putative ABC transporter [Oryza sativa Japonica Group]
Os02g0627750	0.000756358	2.38544	up	--	K05391|0|osa:4330041|putative cyclic nucleotide-gated ion channel 15	putative cyclic nucleotide-gated calmodulin-binding ion channel [Oryza sativa Japonica Group]
Os06g0218600	0.0468699	1.16406	up	--	--	blue copper protein [Oryza sativa Japonica Group]
Os02g0731400	0.0468699	1.16406	up	--	--	basic blue protein [Oryza sativa Japonica Group]
Os04g0272200	0.029319	-4.7326	down	Biological Process: metabolic process (GO:0008152);; Molecular Function: transferase activity, transferring glycosyl groups (GO:0016757);;	--	OSJNBb0056F09.12 [Oryza sativa Japonica Group]
Os01g0136000	0.00408516	-2.02382	down	Biological Process: protein complex assembly (GO:0006461);; Biological Process: response to stress (GO:0006950);; Cellular Component: intrinsic component of membrane (GO:0031224);; Cellular Component: intracellular part (GO:0044424);;	--	Os01g0136050, partial [Oryza sativa Japonica Group]
Os03g0730000	0.029319	-4.7326	down	--	K06129|0|osa:4333995|lecithin-cholesterol acyltransferase-like 1	putative lecithin-cholesterol acyl transferase [Oryza sativa Japonica Group]
Os03g0796400	0.0264601	1.02974	up	Molecular Function: structural molecule activity (GO:0005198);; Biological Process: gene expression (GO:0010467);; Cellular Component: intracellular ribonucleoprotein complex (GO:0030529);;	--	Os03g0796400, partial [Oryza sativa Japonica Group]
Os10g0350500	0.0468699	1.16406	up	Molecular Function: catalytic activity (GO:0003824);; Biological Process: dehiscence (GO:0009900);; Biological Process: pollen wall assembly (GO:0010208);; Cellular Component: intrinsic component of membrane (GO:0031224);;	--	Os10g0350500, partial [Oryza sativa Japonica Group]
Os05g0132300	0.0319595	2.45777	up	--	--	Os05g0132300, partial [Oryza sativa Japonica Group]
Os12g0221400	0.029319	-4.7326	down	Cellular Component: intracellular membrane-bounded organelle (GO:0043231);;	--	hypothetical protein LOC_Os12g11980 [Oryza sativa Japonica Group]
Os01g0680900	0.0264601	1.02974	up	Molecular Function: oxidoreductase activity (GO:0016491);; Cellular Component: intrinsic component of membrane (GO:0031224);; Biological Process: single-organism metabolic process (GO:0044710);;	--	cytochrome b561 and DOMON domain-containing protein At3g61750 [Oryza sativa Japonica Group]
Os07g0545500	0.000756358	2.38544	up	Cellular Component: intrinsic component of membrane (GO:0031224);;	--	hypothetical protein EE612_039862, partial [Oryza sativa]
Os01g0349400	0.0468699	1.16406	up	--	K06269|0|osa:4326473|serine/threonine-protein phosphatase PP1	serine/threonine-protein phosphatase PP1 [Oryza sativa Japonica Group]
Os04g0545600	0.0468699	1.16406	up	--	--	mavicyanin [Oryza sativa Japonica Group]
Os02g0734300	0.00408516	-2.02382	down	Molecular Function: catalytic activity (GO:0003824);; Cellular Component: intracellular membrane-bounded organelle (GO:0043231);;	K07766|2.67679e-102|osa:4330642|nudix hydrolase 21, chloroplastic	nudix hydrolase 21, chloroplastic [Oryza sativa Japonica Group]
Os08g0564000	0.0446808	-1.61499	down	Molecular Function: secondary active transmembrane transporter activity (GO:0015291);; Biological Process: inorganic anion transport (GO:0015698);; Cellular Component: intrinsic component of membrane (GO:0031224);;	K08176|0|osa:4346342|inorganic phosphate transporter 1-6	inorganic phosphate transporter 1-6 [Oryza sativa Japonica Group]
Os06g0224200	0.0357617	1.315	up	Biological Process: signal transduction (GO:0007165);; Molecular Function: disulfide oxidoreductase activity (GO:0015036);; Biological Process: cellular homeostasis (GO:0019725);; Cellular Component: cell part (GO:0044464);; Biological Process: single-organism metabolic process (GO:0044710);;	--	uncharacterized protein LOC4340534 [Oryza sativa Japonica Group]
Os03g0188100	0.00173739	-2.23078	down	Molecular Function: secondary active transmembrane transporter activity (GO:0015291);; Biological Process: drug transport (GO:0015893);; Cellular Component: intrinsic component of membrane (GO:0031224);;	--	Os03g0188100 [Oryza sativa Japonica Group]
Os01g0153900	0.0264601	1.02974	up	--	--	Os01g0153900 [Oryza sativa Japonica Group]
Os05g0592800	0.00173739	-2.23078	down	Molecular Function: phosphoprotein phosphatase activity (GO:0004721);; Biological Process: cellular protein modification process (GO:0006464);; Molecular Function: cation binding (GO:0043169);;	K14497|3.47871e-144|osa:4339797|probable protein phosphatase 2C 53	unnamed protein product [Oryza sativa Japonica Group]
Os06g0495700	0.00173739	-2.23078	down	Molecular Function: transition metal ion binding (GO:0046914);; Molecular Function: organic cyclic compound binding (GO:0097159);;	--	Os06g0495700 [Oryza sativa Japonica Group]
Os07g0668800	0.0118521	-1.93749	down	Biological Process: transport (GO:0006810);; Cellular Component: intrinsic component of membrane (GO:0031224);;	--	BTB/POZ domain-containing protein At3g05675 [Oryza sativa Japonica Group]
Os12g0571900	0.029319	-4.7326	down	--	--	cleavage stimulation factor subunit 77 isoform X2 [Oryza sativa Japonica Group]
Os04g0446000	0.029319	-4.7326	down	--	--	Os04g0446000, partial [Oryza sativa Japonica Group]
Os06g0241100	0.0174232	1.36286	up	Molecular Function: protein kinase activity (GO:0004672);; Biological Process: cellular protein modification process (GO:0006464);; Biological Process: phosphate-containing compound metabolic process (GO:0006796);; Cellular Component: intrinsic component of membrane (GO:0031224);; Molecular Function: purine ribonucleoside binding (GO:0032550);;	--	G-type lectin S-receptor-like serine/threonine-protein kinase SD2-5 [Oryza sativa Japonica Group]
Os10g0577100	0.00408516	-2.02382	down	Cellular Component: intracellular membrane-bounded organelle (GO:0043231);;	--	Os10g0577100 [Oryza sativa Japonica Group]
Os09g0426100	0.0330586	-1.14032	down	--	--	WAT1-related protein At4g30420 isoform X2 [Oryza sativa Japonica Group]
Os01g0622100	0.00408516	-2.02382	down	--	--	hypothetical protein EE612_004143 [Oryza sativa]
Os07g0272400	0.00408516	-2.02382	down	--	K20523|0|osa:4342899|uncharacterized protein LOC4342899	uncharacterized protein LOC4342899 [Oryza sativa Japonica Group]
Os12g0182100	0.0468699	1.16406	up	--	--	Os12g0182100 [Oryza sativa Japonica Group]
Os05g0580000	0.00567533	-1.538	down	Biological Process: glycogen metabolic process (GO:0005977);; Biological Process: starch metabolic process (GO:0005982);; Cellular Component: plastid (GO:0009536);; Molecular Function: purine ribonucleoside binding (GO:0032550);; Molecular Function: adenylyltransferase activity (GO:0070566);;	K00975|0|osa:4339718|glucose-1-phosphate adenylyltransferase large subunit, chloroplastic/amyloplastic	glucose-1-phosphate adenylyltransferase large subunit 3, chloroplastic/amyloplastic-like [Oryza sativa Japonica Group]
Os01g0891601	0.029319	-4.7326	down	Biological Process: cellular protein modification process (GO:0006464);; Molecular Function: kinase activity (GO:0016301);; Cellular Component: intrinsic component of membrane (GO:0031224);; Molecular Function: purine ribonucleoside binding (GO:0032550);; Cellular Component: intracellular membrane-bounded organelle (GO:0043231);;	--	probably inactive leucine-rich repeat receptor-like protein kinase At5g48380 [Oryza sativa Japonica Group]
Os02g0526650	0.0330586	-1.14032	down	--	--	Os02g0526650 [Oryza sativa Japonica Group]
Os03g0161000	0.00695975	-1.89191	down	Cellular Component: intrinsic component of membrane (GO:0031224);; Cellular Component: intracellular membrane-bounded organelle (GO:0043231);;	--	expressed protein [Oryza sativa Japonica Group]
Os04g0435300	0.0327501	-1.30477	down	--	--	Os04g0435300 [Oryza sativa Japonica Group]
Os06g0192500	0.00567533	-1.538	down	--	K12818|0|osa:4340375|pre-mRNA-splicing factor ATP-dependent RNA helicase DEAH10	pre-mRNA-splicing factor ATP-dependent RNA helicase DEAH10 [Oryza sativa Japonica Group]
Os01g0309900	0.00173739	-2.23078	down	Molecular Function: catalytic activity (GO:0003824);; Biological Process: lipid metabolic process (GO:0006629);;	--	uncharacterized protein LOC4327762 [Oryza sativa Japonica Group]
Os03g0268400	0.00367195	2.32894	up,down	Molecular Function: mannose-phosphate guanylyltransferase activity (GO:0008905);; Biological Process: nucleotide-sugar biosynthetic process (GO:0009226);; Molecular Function: purine ribonucleoside binding (GO:0032550);; Cellular Component: intracellular membrane-bounded organelle (GO:0043231);; Molecular Function: transition metal ion binding (GO:0046914);;	--	Os03g0268400 [Oryza sativa Japonica Group]
Os11g0256300	0.029319	-4.7326	down	Biological Process: DNA metabolic process (GO:0006259);; Cellular Component: intrinsic component of membrane (GO:0031224);; Cellular Component: intracellular membrane-bounded organelle (GO:0043231);; Molecular Function: transition metal ion binding (GO:0046914);;	--	expressed protein [Oryza sativa Japonica Group]
Os05g0206800	0.0468699	1.16406	up	--	--	unknown protein [Oryza sativa Japonica Group]
Os02g0710500	0.00173739	-2.23078	down	--	--	putative receptor-like protein kinase At4g00960 [Oryza sativa Japonica Group]
Os02g0663100	0.0319595	2.45777	up	--	--	scarecrow-like protein 6 [Oryza sativa Japonica Group]
Os04g0511700	0.00408516	-2.02382	down	--	--	uncharacterized protein LOC4336380 [Oryza sativa Japonica Group]
Os01g0210400	0.000756358	2.38544	up	Biological Process: cell morphogenesis involved in differentiation (GO:0000904);; Molecular Function: hydrolase activity, hydrolyzing O-glycosyl compounds (GO:0004553);; Biological Process: regulation of stomatal movement (GO:0010119);; Cellular Component: cell projection (GO:0042995);; Cellular Component: intracellular membrane-bounded organelle (GO:0043231);;	--	hypothetical protein [Oryza sativa Japonica Group]
Os02g0471500	0.000756358	2.38544	up	Molecular Function: phosphoprotein phosphatase activity (GO:0004721);; Biological Process: cellular protein modification process (GO:0006464);; Molecular Function: cation binding (GO:0043169);;	--	probable protein phosphatase 2C 14 [Oryza sativa Japonica Group]
Os04g0612100	0.00408516	-2.02382	down	--	--	Os04g0612100, partial [Oryza sativa Japonica Group]
Os09g0442700	0.0164037	-1.90398	down	Cellular Component: chromatin (GO:0000785);; Molecular Function: DNA helicase activity (GO:0003678);; Biological Process: DNA methylation (GO:0006306);; Biological Process: genetic transfer (GO:0009292);; Biological Process: gene expression (GO:0010467);; Biological Process: positive regulation of histone methylation (GO:0031062);; Biological Process: transposition (GO:0032196);; Biological Proce…	K19001|0|osa:4347183|ATP-dependent DNA helicase DDM1	ATP-dependent DNA helicase DDM1 [Oryza sativa Japonica Group]
Os07g0665200	0.00058162	2.35229	up	--	--	hypothetical protein OsJ_25485 [Oryza sativa Japonica Group]
Os08g0546700	0.00408516	-2.02382	down	--	--	RHOMBOID-like protein 2 [Oryza sativa Japonica Group]
Os12g0459300	0.0304813	1.87352	up	Molecular Function: helicase activity (GO:0004386);; Biological Process: DNA metabolic process (GO:0006259);; Biological Process: DNA geometric change (GO:0032392);;	K07466|0|osa:107279348|replication protein A 70 kDa DNA-binding subunit D-like isoform X1	uncharacterized protein LOC9267037 isoform X2 [Oryza sativa Japonica Group]
Os05g0460900	0.00408516	-2.02382	down	--	--	zinc finger protein ZAT7 [Oryza sativa Japonica Group]
Os05g0128100	0.0248093	-1.97024	down	Cellular Component: intrinsic component of membrane (GO:0031224);; Cellular Component: intracellular membrane-bounded organelle (GO:0043231);;	--	unknown protein [Oryza sativa Japonica Group]
Os08g0232700	0.0174232	1.36286	up	Biological Process: vesicle-mediated transport (GO:0016192);; Cellular Component: protein complex (GO:0043234);;	--	exocyst complex component EXO70E2 isoform X1 [Oryza sativa Japonica Group]
Os04g0583700	0.00173739	-2.23078	down	Molecular Function: cation binding (GO:0043169);;	--	Os04g0583700 [Oryza sativa Japonica Group]
Os04g0663100	0.00173739	-2.23078	down	Biological Process: response to acid chemical (GO:0001101);; Cellular Component: plastid envelope (GO:0009526);; Cellular Component: microtubule cytoskeleton (GO:0015630);; Cellular Component: membrane (GO:0016020);;	--	protein IQ-DOMAIN 32 [Oryza sativa Japonica Group]
Os02g0652100	0.029319	-4.7326	down	Molecular Function: nucleic acid binding transcription factor activity (GO:0001071);; Molecular Function: DNA binding (GO:0003677);; Biological Process: transcription, DNA-templated (GO:0006351);;	--	probable WRKY transcription factor 12 [Oryza sativa Japonica Group]
Os03g0266300	0.00408516	-2.02382	down	Biological Process: response to reactive oxygen species (GO:0000302);; Biological Process: response to metal ion (GO:0010038);; Cellular Component: intracellular membrane-bounded organelle (GO:0043231);; Biological Process: response to alcohol (GO:0097305);;	K13993|1.10084e-89|osa:4332357|17.9 kDa class I heat shock protein	17.9 kDa class I heat shock protein [Oryza sativa Japonica Group]
Os01g0140100	0.00408516	-2.02382	down	--	K22683|0|osa:4325476|protein ASPARTIC PROTEASE IN GUARD CELL 1	hypothetical protein OsI_00323 [Oryza sativa Indica Group]
Os09g0401550	0.000756358	2.38544	up	Molecular Function: nucleic acid binding (GO:0003676);; Biological Process: DNA metabolic process (GO:0006259);; Biological Process: response to fungus (GO:0009620);; Cellular Component: intracellular membrane-bounded organelle (GO:0043231);;	K14011|0|osa:4347001|plant UBX domain-containing protein 2	plant UBX domain-containing protein 2 [Oryza sativa Japonica Group]
Os01g0354700	0.00408516	-2.02382	down	Biological Process: phosphate-containing compound metabolic process (GO:0006796);; Molecular Function: purine ribonucleoside binding (GO:0032550);;	--	Os01g0354700 [Oryza sativa Japonica Group]
Os04g0253601	0.0174232	-1.30477	up,down	--	--	Os04g0253601 [Oryza sativa Japonica Group]
Os09g0442800	0.029319	-4.7326	down	Cellular Component: intrinsic component of membrane (GO:0031224);; Cellular Component: intracellular membrane-bounded organelle (GO:0043231);;	--	Os09g0442800 [Oryza sativa Japonica Group]
Os09g0515100	0.0118521	-1.93749	down	--	K22531|0|osa:4347572|ATPase family AAA domain-containing protein At1g05910	ATPase family AAA domain-containing protein At1g05910 [Oryza sativa Japonica Group]
Os05g0108400	0.0468699	1.16406	up	Cellular Component: intrinsic component of membrane (GO:0031224);;	--	uncharacterized protein LOC4337580 [Oryza sativa Japonica Group]
Os09g0446275	0.0468699	1.16406	up	--	--	Os09g0446275, partial [Oryza sativa Japonica Group]
Os09g0472200	0.0446808	-1.61499	down	--	--	Os09g0472200 [Oryza sativa Japonica Group]
Os02g0288000	0.00173739	-2.23078	down	--	--	uncharacterized protein LOC4329044 [Oryza sativa Japonica Group]
Os10g0136625	0.00173739	-2.23078	down	Molecular Function: protein kinase activity (GO:0004672);; Biological Process: cellular protein modification process (GO:0006464);; Biological Process: phosphate-containing compound metabolic process (GO:0006796);; Cellular Component: intrinsic component of membrane (GO:0031224);; Molecular Function: purine ribonucleoside binding (GO:0032550);;	--	cysteine-rich receptor-like protein kinase 4 [Oryza sativa Japonica Group]
Os07g0182900	0.00567533	-1.538	down	Molecular Function: nucleic acid binding (GO:0003676);; Molecular Function: S-adenosylmethionine-dependent methyltransferase activity (GO:0008757);; Biological Process: DNA methylation on cytosine (GO:0032776);; Cellular Component: intracellular membrane-bounded organelle (GO:0043231);; Molecular Function: macromolecular complex binding (GO:0044877);;	K00558|0|osa:4342575|DNA (cytosine-5)-methyltransferase 1B	DNA (cytosine-5)-methyltransferase 1B [Oryza sativa Japonica Group]
Os04g0587751	0.0468699	1.16406	up	--	--	uncharacterized protein LOC9266197 [Oryza sativa Japonica Group]
Os09g0444800	0.000756358	2.38544	up	Molecular Function: protein kinase activity (GO:0004672);; Biological Process: cellular protein modification process (GO:0006464);; Cellular Component: intrinsic component of membrane (GO:0031224);; Molecular Function: purine ribonucleoside binding (GO:0032550);;	--	hypothetical protein EE612_048158 [Oryza sativa]
Os10g0561300	0.0248093	-1.97024	down	--	K24193|0|osa:4349384|hexose carrier protein HEX6	hexose carrier protein HEX6 [Oryza sativa Japonica Group]
Os01g0842500	0.0357617	1.315	up	--	K05909|0|osa:4327501|laccase-12/13-like	laccase-13-like [Oryza sativa Japonica Group]
Os09g0531200	0.00173739	-2.23078	down	--	--	protein MEI2-like 6 [Oryza sativa Japonica Group]
Os03g0360700	0.00408516	-2.02382	down	Cellular Component: cytoplasm (GO:0005737);; Biological Process: response to stress (GO:0006950);; Molecular Function: oxidoreductase activity, acting on a sulfur group of donors, disulfide as acceptor (GO:0016671);; Molecular Function: cation binding (GO:0043169);; Biological Process: cellular protein metabolic process (GO:0044267);; Biological Process: single-organism metabolic process (GO:0044…	K07305|1.61289e-94|osa:4332888|peptide methionine sulfoxide reductase B5	unknown [Oryza sativa Japonica Group]
Os01g0775100	0.0327062	-2.43442	down	--	--	Os01g0775100, partial [Oryza sativa Japonica Group]
Os02g0662700	0.0319595	2.45777	up	--	--	scarecrow-like protein 6 [Oryza sativa Japonica Group]
Os01g0857600	0.00408516	-2.02382	down	--	--	uncharacterized protein LOC4324759 [Oryza sativa Japonica Group]
Os07g0628600	0.0468699	1.16406	up	Cellular Component: origin recognition complex (GO:0000808);; Molecular Function: nucleic acid binding (GO:0003676);; Biological Process: DNA metabolic process (GO:0006259);; Cellular Component: intracellular membrane-bounded organelle (GO:0043231);;	K02608|1.35392e-176|osa:4343985|origin of replication complex subunit 6	origin of replication complex subunit 6 [Oryza sativa Japonica Group]
Os09g0570951	0.00408516	-2.02382	down	--	--	ACT domain-containing protein ACR10 isoform X1 [Oryza sativa Japonica Group]
Os08g0485800	0.029319	-4.7326	down	Cellular Component: extracellular region (GO:0005576);; Biological Process: aerobic respiration (GO:0009060);; Cellular Component: external encapsulating structure (GO:0030312);;	--	putative EG45-like domain containing protein 1 [Oryza sativa Japonica Group]
Os04g0558700	0.00367195	2.32894	up,down	--	--	uncharacterized protein LOC4336640 [Oryza sativa Japonica Group]
Os04g0670600	0.00408516	-2.02382	down	Cellular Component: intrinsic component of membrane (GO:0031224);;	--	Os04g0670600, partial [Oryza sativa Japonica Group]
Os12g0630500	0.0357617	1.315	up	--	--	alpha-amylase/trypsin inhibitor [Oryza sativa Japonica Group]
Os11g0162700	0.00173739	-2.23078	down	Cellular Component: intracellular membrane-bounded organelle (GO:0043231);;	--	Os11g0162700, partial [Oryza sativa Japonica Group]
Os10g0436900	0.0327501	-1.30477	down	Biological Process: transport (GO:0006810);; Cellular Component: intrinsic component of membrane (GO:0031224);;	K13754|0|osa:4348706|cation/calcium exchanger 1	cation/calcium exchanger 1 [Oryza sativa Japonica Group]
Os08g0467100	0.00408516	-2.02382	down	Molecular Function: cation binding (GO:0043169);; Cellular Component: intracellular membrane-bounded organelle (GO:0043231);; Molecular Function: organic cyclic compound binding (GO:0097159);;	--	protein SHOOT GRAVITROPISM 5 [Oryza sativa Japonica Group]
Os10g0138600	0.0357617	1.315	up	--	--	Hypothetical protein [Oryza sativa]
Os08g0300333	0.00408516	-2.02382	down	Molecular Function: chloride channel activity (GO:0005254);; Biological Process: inorganic anion transport (GO:0015698);; Cellular Component: intrinsic component of membrane (GO:0031224);; Biological Process: regulation of ion transmembrane transport (GO:0034765);;	K05016|0|osa:4345218|putative chloride channel-like protein CLC-g	putative chloride channel-like protein CLC-g [Oryza sativa Japonica Group]
Os03g0424300	0.00408516	-2.02382	down	Molecular Function: nucleic acid binding (GO:0003676);;	--	Os03g0424300, partial [Oryza sativa Japonica Group]
Os01g0782100	0.0118521	-1.93749	down	Molecular Function: purine ribonucleoside binding (GO:0032550);;	--	putative disease resistance RPP13-like protein 1 [Oryza sativa Japonica Group]
CAA33995	0.0248093	-1.97024	down	Biological Process: cellular protein modification process (GO:0006464);; Cellular Component: photosystem (GO:0009521);; Cellular Component: chloroplast thylakoid (GO:0009534);; Molecular Function: carbon-oxygen lyase activity, acting on phosphates (GO:0016838);; Cellular Component: intrinsic component of membrane (GO:0031224);; Biological Process: single-organism metabolic process (GO:0044710);; …	K02690|0|osa:3131407|psaB, OrsajCp024; photosystem I P700 chlorophyll a apoprotein A2	photosystem I P700 apoprotein A2 (chloroplast) [Oryza sativa Japonica Group]
Os06g0299100	0.00173739	-2.23078	down	Molecular Function: catalytic activity (GO:0003824);; Cellular Component: intrinsic component of membrane (GO:0031224);; Biological Process: single-organism metabolic process (GO:0044710);;	K10251|0|osa:4340816|very-long-chain 3-oxoacyl-CoA reductase 1	very-long-chain 3-oxoacyl-CoA reductase 1 [Oryza sativa Japonica Group]
Os02g0727966	0.0174232	1.36286	up	--	--	Os02g0727966, partial [Oryza sativa Japonica Group]
Os02g0518400	0.0319595	2.45777	up	Cellular Component: intrinsic component of membrane (GO:0031224);; Molecular Function: cation binding (GO:0043169);; Molecular Function: organic cyclic compound binding (GO:0097159);;	--	Os02g0518400 [Oryza sativa Japonica Group]
Os03g0169700	0.000756358	2.38544	up	Molecular Function: nucleic acid binding (GO:0003676);; Biological Process: transcription, DNA-templated (GO:0006351);;	--	cyclic dof factor 1 [Oryza sativa Japonica Group]
Os01g0230200	0.00408516	-2.02382	down	--	--	transcription factor bHLH68 isoform X4 [Oryza sativa Japonica Group]
Os03g0226600	0.029319	-4.7326	down	--	--	uncharacterized protein LOC4332126 [Oryza sativa Japonica Group]
Os08g0356001	0.029319	-4.7326	down	Molecular Function: transferase activity, transferring nitrogenous groups (GO:0016769);; Cellular Component: intracellular membrane-bounded organelle (GO:0043231);;	--	aminotransferase-like protein [Oryza sativa Japonica Group]
Os01g0507000	0.0264601	1.02974	up	Cellular Component: intrinsic component of membrane (GO:0031224);; Cellular Component: intracellular membrane-bounded organelle (GO:0043231);;	--	unknown [Oryza sativa Indica Group]
Os03g0604401	0.00058162	2.35229	up	--	--	hypothetical protein OsJ_22000 [Oryza sativa Japonica Group]
Os02g0807700	0.029319	-4.7326	down	--	--	protein LOL1 isoform X1 [Oryza sativa Japonica Group]
Os11g0551900	0.00173739	-2.23078	down	Biological Process: transcription, DNA-templated (GO:0006351);; Molecular Function: purine ribonucleoside binding (GO:0032550);; Cellular Component: intracellular membrane-bounded organelle (GO:0043231);;	--	expressed protein [Oryza sativa Japonica Group]
Os01g0569800	0.0468699	1.16406	up	Cellular Component: intrinsic component of membrane (GO:0031224);; Cellular Component: intracellular membrane-bounded organelle (GO:0043231);;	--	Os01g0569800, partial [Oryza sativa Japonica Group]
Os03g0342850	0.00408516	-2.02382	down	--	--	expressed protein [Oryza sativa Japonica Group]
Os01g0111500	0.0468699	1.16406	up	--	--	transcription factor bHLH83 [Oryza sativa Japonica Group]
Os06g0590800	0.0468699	1.16406	up	Biological Process: flavonoid metabolic process (GO:0009812);; Molecular Function: UDP-glucosyltransferase activity (GO:0035251);;	--	UDP-glycosyltransferase 73B5 [Oryza sativa Japonica Group]
Os11g0539800	0.0357617	1.315	up	--	K01262|0|osa:4350665|probable Xaa-Pro aminopeptidase P	aminopeptidase P1 [Oryza sativa Japonica Group]
Os02g0656300	0.0304813	1.87352	up	Cellular Component: nuclear ubiquitin ligase complex (GO:0000152);; Biological Process: defense response (GO:0006952);; Biological Process: metaphase/anaphase transition of mitotic cell cycle (GO:0007091);;	K03355|0|osa:4330199|anaphase-promoting complex subunit 8	anaphase-promoting complex subunit 8 [Oryza sativa Japonica Group]
Os08g0124850	0.000756358	2.38544	up	Molecular Function: protein kinase activity (GO:0004672);; Biological Process: protein phosphorylation (GO:0006468);; Cellular Component: intrinsic component of membrane (GO:0031224);; Molecular Function: purine ribonucleoside binding (GO:0032550);;	--	LOW QUALITY PROTEIN: L-type lectin-domain containing receptor kinase IX.1 [Oryza sativa Japonica Group]
Os07g0604500	0.00408516	-2.02382	down	--	K17795|2.52535e-98|osa:4343846|mitochondrial import inner membrane translocase subunit TIM17-2	mitochondrial import inner membrane translocase subunit TIM17-2 [Oryza sativa Japonica Group]
Os08g0102400	0.00408516	-2.02382	down	--	--	transcription repressor OFP13 [Oryza sativa Japonica Group]
Os01g0725800	0.00173739	-2.23078	down	Biological Process: cellular protein modification process (GO:0006464);; Molecular Function: kinase activity (GO:0016301);; Molecular Function: purine ribonucleoside binding (GO:0032550);;	--	Cop1 protein-like [Oryza sativa Japonica Group]
Os10g0395150	0.0304813	1.87352	up	Molecular Function: cytoskeletal protein binding (GO:0008092);; Cellular Component: actin cytoskeleton (GO:0015629);; Molecular Function: nucleoside-triphosphatase activity (GO:0017111);; Molecular Function: purine ribonucleoside binding (GO:0032550);;	--	Os10g0395150, partial [Oryza sativa Japonica Group]
Os01g0129500	0.00408516	-2.02382	down	Molecular Function: structural molecule activity (GO:0005198);; Cellular Component: ribosome (GO:0005840);; Biological Process: gene expression (GO:0010467);; Cellular Component: intrinsic component of membrane (GO:0031224);;	--	uncharacterized protein LOC4325971 [Oryza sativa Japonica Group]
Os07g0102500	0.00173739	-2.23078	down	--	K15191|0|osa:4342177|la-related protein 6C	la-related protein 6C [Oryza sativa Japonica Group]
Os10g0523900	0.00408516	-2.02382	down	Molecular Function: nucleic acid binding transcription factor activity (GO:0001071);; Molecular Function: nucleic acid binding (GO:0003676);; Biological Process: transcription, DNA-templated (GO:0006351);; Cellular Component: intracellular membrane-bounded organelle (GO:0043231);;	--	hypothetical protein EE612_052372 [Oryza sativa]
Os09g0384601	0.0264601	1.02974	up	--	--	uncharacterized protein LOC4346943 [Oryza sativa Japonica Group]
Os07g0109300	0.00173739	-2.23078	down	Biological Process: cellular protein modification process (GO:0006464);;	--	Os07g0109300, partial [Oryza sativa Japonica Group]
Os09g0423800	0.000756358	2.38544	up	Molecular Function: nucleic acid binding transcription factor activity (GO:0001071);; Molecular Function: nucleic acid binding (GO:0003676);; Biological Process: transcription, DNA-templated (GO:0006351);; Cellular Component: intracellular membrane-bounded organelle (GO:0043231);; Biological Process: single-multicellular organism process (GO:0044707);;	--	Os09g0423800, partial [Oryza sativa Japonica Group]
Os02g0650500	0.00408516	-2.02382	down	Molecular Function: protein kinase activity (GO:0004672);; Biological Process: cellular protein modification process (GO:0006464);; Molecular Function: purine ribonucleoside binding (GO:0032550);;	--	probable serine/threonine-protein kinase PBL19 [Oryza sativa Japonica Group]
Os04g0550800	0.000756358	2.38544	up	--	K09873|1.72649e-140|osa:4336593|probable aquaporin TIP5-1	probable aquaporin TIP5-1 [Oryza sativa Japonica Group]
Os09g0538700	0.0264601	1.02974	up	--	--	nitrate regulatory gene2 protein [Oryza sativa Japonica Group]
Os03g0758950	0.0319595	2.45777	up	Molecular Function: nucleic acid binding transcription factor activity (GO:0001071);; Molecular Function: DNA binding (GO:0003677);; Biological Process: transcription, DNA-templated (GO:0006351);; Cellular Component: intrinsic component of membrane (GO:0031224);; Cellular Component: intracellular membrane-bounded organelle (GO:0043231);; Biological Process: response to stimulus (GO:0050896);;	--	WRKY11 [Oryza sativa Japonica Group]
Os01g0103900	0.0468699	1.16406	up	--	--	uncharacterized protein LOC4326452 isoform X2 [Oryza sativa Japonica Group]
Os08g0171700	0.0248093	-1.97024	down	--	--	unnamed protein product [Oryza sativa Japonica Group]
Os06g0114400	0.0191364	-2.57341	down	--	--	Os06g0114400, partial [Oryza sativa Japonica Group]
Os02g0116800	0.0327062	-2.43442	down	--	--	uncharacterized protein LOC4328082 [Oryza sativa Japonica Group]
Os07g0134101	0.00408516	-2.02382	down	--	--	hypothetical protein OsI_24794 [Oryza sativa Indica Group]
Os10g0553300	0.00173739	-2.23078	down	Biological Process: trehalose metabolic process (GO:0005991);; Biological Process: phosphate-containing compound metabolic process (GO:0006796);; Molecular Function: carbohydrate phosphatase activity (GO:0019203);; Cellular Component: intrinsic component of membrane (GO:0031224);;	K01087|0|osa:4349333|probable trehalose-phosphate phosphatase 2	hypothetical protein OsI_34594 [Oryza sativa Indica Group]
Os01g0133500	0.00173739	-2.23078	down	Cellular Component: intracellular membrane-bounded organelle (GO:0043231);;	--	uncharacterized protein LOC4325805 isoform X1 [Oryza sativa Japonica Group]
Os09g0509200	0.0357617	1.315	up	Molecular Function: pyruvate dehydrogenase activity (GO:0004738);; Biological Process: acetyl-CoA biosynthetic process (GO:0006085);; Biological Process: pyruvate metabolic process (GO:0006090);; Cellular Component: mitochondrial part (GO:0044429);;	K00162|0|osa:4347531|pyruvate dehydrogenase E1 component subunit beta-2, mitochondrial	pyruvate dehydrogenase E1 component subunit beta-2, mitochondrial [Oryza sativa Japonica Group]
Os09g0265800	0.000756358	2.38544	up	Biological Process: RNA splicing, via transesterification reactions with bulged adenosine as nucleophile (GO:0000377);; Cellular Component: spliceosomal complex (GO:0005681);; Cellular Component: membrane (GO:0016020);; Molecular Function: endoribonuclease activity, producing 5'-phosphomonoesters (GO:0016891);; Biological Process: RNA phosphodiester bond hydrolysis (GO:0090501);; Molecular Functi…	--	retrotransposon protein, putative, Ty3-gypsy sub-class [Oryza sativa Japonica Group]
Os01g0530400	0.029319	-4.7326	down	Molecular Function: disulfide oxidoreductase activity (GO:0015036);; Biological Process: cellular homeostasis (GO:0019725);; Molecular Function: cation binding (GO:0043169);; Cellular Component: intracellular membrane-bounded organelle (GO:0043231);; Biological Process: single-organism metabolic process (GO:0044710);; Molecular Function: iron-sulfur cluster binding (GO:0051536);;	--	Glutaredoxin-like protein [Oryza sativa Japonica Group]
Os12g0566400	0.0304813	1.87352	up	Cellular Component: intrinsic component of membrane (GO:0031224);; Cellular Component: intracellular membrane-bounded organelle (GO:0043231);;	K23566|1.24059e-55|osa:4352550|membrane magnesium transporter	membrane magnesium transporter [Oryza sativa Japonica Group]
Os09g0491820	0.00173739	-2.23078	down	Molecular Function: cofactor binding (GO:0048037);;	--	cinnamoyl-CoA reductase 1 isoform X1 [Oryza sativa Japonica Group]
Os12g0243050	0.0330586	-1.14032	down	--	--	Os12g0243050, partial [Oryza sativa Japonica Group]
Os01g0232700	0.0357617	1.315	up	Molecular Function: nucleotide binding (GO:0000166);; Biological Process: histidine metabolic process (GO:0006547);; Cellular Component: plastid stroma (GO:0009532);; Molecular Function: oxidoreductase activity, acting on the CH-OH group of donors, NAD or NADP as acceptor (GO:0016616);; Molecular Function: transition metal ion binding (GO:0046914);; Biological Process: gametophyte development (GO…	K00013|0|osa:4324282|histidinol dehydrogenase, chloroplastic	histidinol dehydrogenase, chloroplastic [Oryza sativa Japonica Group]
Os12g0542000	0.0248093	-1.97024	down	--	--	Rapid ALkalinization Factor family protein, expressed [Oryza sativa Japonica Group]
Os03g0351500	0.00058162	2.35229	up	--	K04565|3.98034e-101|osa:4332846|superoxide dismutase [Cu-Zn] 1	Superoxide dismutase 1, putative, expressed [Oryza sativa Japonica Group]
Os05g0161400	0.00408516	-2.02382	down	Biological Process: purine ribonucleotide metabolic process (GO:0009150);; Cellular Component: intracellular membrane-bounded organelle (GO:0043231);; Molecular Function: metal ion binding (GO:0046872);;	--	uncharacterized protein LOC4337889 isoform X1 [Oryza sativa Japonica Group]
Os08g0557500	0.0327062	-2.43442	down	Molecular Function: protein binding (GO:0005515);; Biological Process: leaf morphogenesis (GO:0009965);; Biological Process: root morphogenesis (GO:0010015);; Biological Process: xylem and phloem pattern formation (GO:0010051);; Biological Process: histone methylation (GO:0016571);; Molecular Function: cis-trans isomerase activity (GO:0016859);; Biological Process: peptidyl-proline modification (…	--	putative cyclophilin (70.8 kD) (cyp-15) [Oryza sativa Japonica Group]
Os04g0350300	0.00173739	-2.23078	down	--	K10400|0|osa:4335552|LOW QUALITY PROTEIN: kinesin-like protein KIN12B	phragmoplast-associated kinesin-related protein 1, partial [Oryza sativa Japonica Group]
Os11g0303500	0.00173739	-2.23078	down	Molecular Function: small molecule binding (GO:0036094);;	--	Os11g0303500, partial [Oryza sativa Japonica Group]
Os01g0860700	0.000756358	2.38544	up	--	--	Os03g0236050, partial [Oryza sativa Japonica Group]
Os10g0152000	0.0191364	-2.57341	down	--	--	wall-associated receptor kinase 2 [Oryza sativa Japonica Group]
Os09g0555600	0.0319595	2.45777	up	Molecular Function: nucleoside-triphosphatase activity (GO:0017111);; Cellular Component: intracellular membrane-bounded organelle (GO:0043231);;	--	protein ACCUMULATION AND REPLICATION OF CHLOROPLASTS 3 isoform X1 [Oryza sativa Japonica Group]
Os04g0656100	0.0446808	-1.61499	down	--	K01535|0|osa:4337257|plasma membrane ATPase	plasma membrane ATPase [Oryza sativa Japonica Group]
Os08g0116900	0.0319595	2.45777	up	Biological Process: cellular protein modification process (GO:0006464);; Molecular Function: transferase activity, transferring hexosyl groups (GO:0016758);; Cellular Component: intrinsic component of membrane (GO:0031224);; Cellular Component: Golgi apparatus part (GO:0044431);;	K20856|0|osa:4344520|beta-1,6-galactosyltransferase GALT31A	beta-1,6-galactosyltransferase GALT31A [Oryza sativa Japonica Group]
Os08g0544600	0.00408516	-2.02382	down	Cellular Component: intrinsic component of membrane (GO:0031224);;	--	uncharacterized protein LOC4346212 [Oryza sativa Japonica Group]
Os04g0639000	0.0357617	1.315	up	--	--	hypothetical protein OsI_17603 [Oryza sativa Indica Group]
Os12g0204600	0.00695975	-1.89191	down	Molecular Function: purine ribonucleoside binding (GO:0032550);; Cellular Component: intracellular membrane-bounded organelle (GO:0043231);;	--	putative disease resistance protein RGA4 [Oryza sativa Japonica Group]
Os01g0727100	0.00408516	-2.02382	down	Biological Process: polysaccharide biosynthetic process (GO:0000271);; Molecular Function: UDP-glycosyltransferase activity (GO:0008194);; Cellular Component: intrinsic component of membrane (GO:0031224);; Cellular Component: Golgi apparatus part (GO:0044431);; Biological Process: external encapsulating structure organization (GO:0045229);;	K20867|0|osa:4324733|probable galacturonosyltransferase 15 isoform X1	probable galacturonosyltransferase 15 [Oryza sativa Japonica Group]
Os12g0197500	0.0327501	-1.30477	down	--	--	protein SUPPRESSOR OF GENE SILENCING 3 homolog [Oryza sativa Japonica Group]
Os02g0184100	0.029319	-4.7326	down	--	--	hypothetical protein EE612_009330 [Oryza sativa]
Os03g0748750	0.029319	-4.7326	down	Cellular Component: intrinsic component of membrane (GO:0031224);;	--	Os03g0748750, partial [Oryza sativa Japonica Group]
Os03g0135550	0.0180158	2.45777	up,down	--	--	Os03g0135550 [Oryza sativa Japonica Group]
Os10g0436950	0.0468699	1.16406	up	Biological Process: transport (GO:0006810);; Cellular Component: intrinsic component of membrane (GO:0031224);;	K13754|0|osa:4348706|cation/calcium exchanger 1	cation/calcium exchanger 1 [Oryza sativa Japonica Group]
Os06g0122800	0.029319	-4.7326	down	Biological Process: protein metabolic process (GO:0019538);; Molecular Function: purine ribonucleoside binding (GO:0032550);; Molecular Function: peptidase activity, acting on L-amino acid peptides (GO:0070011);;	--	Os06g0122600 [Oryza sativa Japonica Group]
Os03g0436400	0.0468699	1.16406	up	Molecular Function: cofactor binding (GO:0048037);;	K22419|0|osa:107275612|3-oxo-Delta(4,5)-steroid 5-beta-reductase-like	hypothetical protein OsI_12184 [Oryza sativa Indica Group]
Os09g0247101	0.0319595	2.45777	up	--	--	hypothetical protein [Oryza sativa Japonica Group]
Os10g0370000	0.00408516	-2.02382	down	--	--	probable protein phosphatase 2C 71 [Oryza sativa Japonica Group]
Os09g0271000	0.029319	-4.7326	down	Cellular Component: intracellular membrane-bounded organelle (GO:0043231);;	--	unnamed protein product [Oryza sativa Japonica Group]
Os03g0575700	0.00408516	-2.02382	down	--	--	Os01g0731550 [Oryza sativa Japonica Group]
Os02g0815600	0.000756358	2.38544	up	--	K07561|0|osa:4331131|diphthamide biosynthesis protein 1	2-(3-amino-3-carboxypropyl)histidine synthase subunit 1 [Oryza sativa Japonica Group]
Os01g0600400	0.0446808	-1.61499	down	--	--	putative pentatricopeptide repeat-containing protein At3g25970 [Oryza sativa Japonica Group]
Os02g0550500	0.0468699	1.16406	up	Molecular Function: transition metal ion binding (GO:0046914);; Molecular Function: organic cyclic compound binding (GO:0097159);;	--	Os06g0661000, partial [Oryza sativa Japonica Group]
Os04g0180400	0.00408516	-2.02382	down	--	--	Os04g0180400, partial [Oryza sativa Japonica Group]
Os08g0502800	0.0248093	-1.97024	down	--	K15223|0|osa:4345963|uncharacterized protein LOC4345963 isoform X1	uncharacterized protein LOC4345963 isoform X1 [Oryza sativa Japonica Group]
Os06g0109000	0.029319	-4.7326	down	--	--	phosphoglycerate mutase-like protein AT74H [Oryza sativa Japonica Group]
Os06g0301300	0.00695975	-1.89191	down	Cellular Component: protein complex (GO:0043234);;	K06699|0|osa:4340828|proteasome activator subunit 4 isoform X1	proteasome activator subunit 4 [Oryza sativa Japonica Group]
Os06g0693600	0.029319	-4.7326	down	--	--	Os06g0693600 [Oryza sativa Japonica Group]
Os04g0442200	0.0327062	-2.43442	down	Molecular Function: nucleic acid binding (GO:0003676);; Biological Process: transcription, DNA-templated (GO:0006351);; Biological Process: hormone-mediated signaling pathway (GO:0009755);; Cellular Component: intracellular membrane-bounded organelle (GO:0043231);;	K09919|0|osa:4335936|uncharacterized protein LOC4335936 isoform X1	uncharacterized protein LOC4335936 isoform X1 [Oryza sativa Japonica Group]
Os03g0588600	0.00173739	-2.23078	down	--	--	hypothetical protein OsI_12423 [Oryza sativa Indica Group]
Os03g0287900	0.00173739	-2.23078	down	--	--	protein disulfide isomerase-like 5-1 [Oryza sativa Japonica Group]
Os02g0108100	0.000756358	2.38544	up	Cellular Component: intracellular membrane-bounded organelle (GO:0043231);;	--	Os02g0108100, partial [Oryza sativa Japonica Group]
Os02g0771600	0.00367195	2.32894	up,down	--	--	1-aminocyclopropane-1-carboxylate oxidase 1-like isoform X2 [Oryza sativa Japonica Group]
Os01g0744550	0.0357617	1.315	up	--	--	golgin-84 [Oryza sativa Japonica Group]
Os05g0390600	0.00408516	-2.02382	down	Molecular Function: enzyme inhibitor activity (GO:0004857);; Biological Process: response to hormone (GO:0009725);; Biological Process: phosphorylation (GO:0016310);;	--	hypothetical protein EE612_029266 [Oryza sativa]
Os04g0555151	0.0180158	-1.40677	down	--	--	hypothetical protein OsJ_15728 [Oryza sativa Japonica Group]
Os04g0472900	0.00408516	-2.02382	down	--	--	FT-interacting protein 1 [Oryza sativa Japonica Group]
Os06g0496400	0.00408516	-2.02382	down	--	--	transcription factor PHYTOCHROME INTERACTING FACTOR-LIKE 13-like [Oryza sativa Japonica Group]
Os03g0311000	0.00408516	-2.02382	down	Cellular Component: intrinsic component of membrane (GO:0031224);;	--	expressed protein [Oryza sativa Japonica Group]
Os07g0657200	0.00173739	-2.23078	down	--	K14005|0|osa:4344154|protein transport protein SEC31 homolog B	protein transport protein SEC31 homolog B [Oryza sativa Japonica Group]
Os10g0456900	0.0327062	-2.43442	down	Molecular Function: nucleoside-triphosphatase activity (GO:0017111);; Biological Process: ribonucleoprotein complex assembly (GO:0022618);; Molecular Function: purine ribonucleoside binding (GO:0032550);; Cellular Component: intracellular membrane-bounded organelle (GO:0043231);;	--	Os10g0456900, partial [Oryza sativa Japonica Group]
Os02g0672500	0.00837882	-1.66824	down	--	--	Os02g0672500, partial [Oryza sativa Japonica Group]
Os10g0420800	0.029319	-4.7326	down	Cellular Component: intracellular membrane-bounded organelle (GO:0043231);;	--	expressed protein [Oryza sativa Japonica Group]
Os10g0560400	0.00408516	-2.02382	down	--	--	transcription factor GHD7-like [Oryza sativa Japonica Group]
Os04g0197100	0.0468699	1.16406	up	--	--	hypothetical protein OsJ_13904 [Oryza sativa Japonica Group]
Os01g0686200	0.00408516	-2.02382	down	--	--	glucosyltransferase NTGT2-like [Oryza sativa Japonica Group]
Os08g0559501	0.029319	-4.7326	down	--	--	hypothetical protein EE612_009330 [Oryza sativa]
Os12g0198400	0.0118521	-1.93749	down	--	--	hypothetical protein EE612_058315, partial [Oryza sativa]
Os11g0129301	0.00058162	2.35229	up	Molecular Function: secondary active transmembrane transporter activity (GO:0015291);; Biological Process: drug transport (GO:0015893);; Cellular Component: intrinsic component of membrane (GO:0031224);;	K03327|1.73222e-165|osa:4351384|protein DETOXIFICATION 21	hypothetical protein OsI_37326 [Oryza sativa Indica Group]
Os07g0545001	0.0357617	1.315	up	Cellular Component: intrinsic component of membrane (GO:0031224);;	--	Os07g0545001, partial [Oryza sativa Japonica Group]
Os08g0124566	0.000756358	2.38544	up	Molecular Function: protein kinase activity (GO:0004672);; Biological Process: protein phosphorylation (GO:0006468);; Cellular Component: intrinsic component of membrane (GO:0031224);; Molecular Function: purine ribonucleoside binding (GO:0032550);;	--	Os08g0124600, partial [Oryza sativa Japonica Group]
Os04g0535600	0.0468699	1.16406	up	Molecular Function: beta-fructofuranosidase activity (GO:0004564);; Cellular Component: intrinsic component of membrane (GO:0031224);; Cellular Component: intracellular membrane-bounded organelle (GO:0043231);; Biological Process: primary metabolic process (GO:0044238);;	K01193|0|osa:4336515|beta-fructofuranosidase 1	beta-fructofuranosidase 1 [Oryza sativa Japonica Group]
Os10g0381601	0.00408516	-2.02382	down	--	--	Os10g0482601, partial [Oryza sativa Japonica Group]
Os01g0956200	0.00408516	-2.02382	down	Molecular Function: transferase activity (GO:0016740);; Cellular Component: intrinsic component of membrane (GO:0031224);;	--	uncharacterized protein LOC4325410 [Oryza sativa Japonica Group]
Os12g0565300	0.00173739	-2.23078	down	Molecular Function: protein binding (GO:0005515);;	K21843|0|osa:4352544|uncharacterized protein LOC4352544	protein NPG1 [Oryza sativa Japonica Group]
Os03g0674700	0.00173739	-2.23078	down	Biological Process: transcription, DNA-templated (GO:0006351);; Molecular Function: purine ribonucleoside binding (GO:0032550);; Cellular Component: intracellular membrane-bounded organelle (GO:0043231);;	--	RecName: Full=Growth-regulating factor 9; Short=OsGRF9; AltName: Full=Transcription activator GRF9
Os05g0548500	0.0446808	-1.61499	down	Biological Process: transport (GO:0006810);; Molecular Function: P-P-bond-hydrolysis-driven transmembrane transporter activity (GO:0015405);; Molecular Function: nucleoside-triphosphatase activity (GO:0017111);; Cellular Component: intrinsic component of membrane (GO:0031224);; Molecular Function: purine ribonucleoside binding (GO:0032550);;	K05658|0|osa:107275736|ABC transporter B family member 5-like	ABC transporter B family member 5 isoform X2 [Oryza sativa Japonica Group]
Os03g0207700	0.00173739	-2.23078	down	--	--	Os03g0207700, partial [Oryza sativa Japonica Group]
Os11g0597400	0.0264601	1.02974	up	Molecular Function: purine ribonucleoside binding (GO:0032550);;	--	expressed protein [Oryza sativa Japonica Group]
Os07g0495300	0.0357617	1.315	up	Cellular Component: intracellular membrane-bounded organelle (GO:0043231);;	--	Os07g0495300 [Oryza sativa Japonica Group]
Os09g0431750	0.00408516	-2.02382	down	Molecular Function: cation binding (GO:0043169);;	--	zinc finger protein 2 [Oryza sativa Japonica Group]
Os10g0531900	0.00408516	-2.02382	down	--	--	transcription factor RF2a-like isoform X1 [Oryza sativa Japonica Group]
Os01g0511600	0.0468699	1.16406	up	Cellular Component: plastid inner membrane (GO:0009528);; Biological Process: plastid organization (GO:0009657);; Cellular Component: intrinsic component of membrane (GO:0031224);; Biological Process: carbohydrate transmembrane transport (GO:0034219);; Molecular Function: aldonate transmembrane transporter activity (GO:0042879);; Biological Process: cellular metabolic compound salvage (GO:0043094…	--	unnamed protein product [Oryza sativa Japonica Group]
Os02g0776900	0.00173739	-2.23078	down	Biological Process: transcription, DNA-templated (GO:0006351);; Biological Process: response to water (GO:0009415);; Molecular Function: purine ribonucleoside binding (GO:0032550);; Cellular Component: intracellular membrane-bounded organelle (GO:0043231);;	--	growth-regulating factor 1 [Oryza sativa Japonica Group]
Os02g0498100	0.0180158	-1.40677	down	--	--	unknown protein [Oryza sativa Japonica Group]
Os06g0355500	0.0264601	1.02974	up	Molecular Function: nucleic acid binding (GO:0003676);; Cellular Component: intracellular membrane-bounded organelle (GO:0043231);;	--	LOW QUALITY PROTEIN: bromodomain-containing factor 2-like [Oryza sativa Japonica Group]
Os08g0245400	0.0118521	-1.93749	down	--	K19562|0|osa:4345056|bifunctional dethiobiotin synthetase/7,8-diamino-pelargonic acid aminotransferase, mitochondrial	bifunctional dethiobiotin synthetase/7,8-diamino-pelargonic acid aminotransferase, mitochondrial [Oryza sativa Japonica Group]
Os03g0299800	0.00173739	-2.23078	down	Cellular Component: intrinsic component of membrane (GO:0031224);; Cellular Component: intracellular membrane-bounded organelle (GO:0043231);;	--	uncharacterized protein LOC4332562 [Oryza sativa Japonica Group]
Os01g0885700	0.0357617	1.315	up	--	--	putative receptor protein kinase ZmPK1 [Oryza sativa Japonica Group]
Os03g0579200	0.029319	-4.7326	down	Molecular Function: purine ribonucleoside binding (GO:0032550);; Cellular Component: intracellular membrane-bounded organelle (GO:0043231);;	--	Os03g0579200 [Oryza sativa Japonica Group]
Os08g0493900	0.0319595	2.45777	up	--	K11374|0|osa:4345916|elongator complex protein 2	elongator complex protein 2 [Oryza sativa Japonica Group]
Os06g0611150	0.0468699	1.16406	up	--	--	uncharacterized protein LOC4341511 [Oryza sativa Japonica Group]
Os08g0149566	0.0327062	-2.43442	down	Cellular Component: intrinsic component of membrane (GO:0031224);;	--	hypothetical protein [Oryza sativa Japonica Group]
Os04g0483600	0.029319	-4.7326	down	--	--	OSJNBa0081L15.6 [Oryza sativa Japonica Group]
Os03g0773000	0.0468699	1.16406	up	--	--	uncharacterized protein LOC4334268 [Oryza sativa Japonica Group]
Os04g0413200	0.0357617	1.315	up	Molecular Function: beta-fructofuranosidase activity (GO:0004564);; Cellular Component: extracellular region (GO:0005576);; Cellular Component: external encapsulating structure (GO:0030312);; Biological Process: primary metabolic process (GO:0044238);;	K01193|0|osa:4335789|beta-fructofuranosidase, insoluble isoenzyme 3	beta-fructofuranosidase, insoluble isoenzyme 3 [Oryza sativa Japonica Group]
Os03g0569000	0.00173739	-2.23078	down	--	--	uncharacterized protein LOC4333281 [Oryza sativa Japonica Group]
Os02g0793300	0.000756358	2.38544	up	Molecular Function: catalytic activity (GO:0003824);;	--	nudix hydrolase 3 [Oryza sativa Japonica Group]
Os04g0487100	0.000756358	2.38544	up	--	--	hypothetical protein OsJ_15258 [Oryza sativa Japonica Group]
Os07g0649200	0.0330586	-1.14032	down	Cellular Component: intrinsic component of membrane (GO:0031224);;	--	putative BLE2 protein [Oryza sativa Japonica Group]
Os06g0297600	0.00173739	-2.23078	down	Cellular Component: intrinsic component of membrane (GO:0031224);;	--	nucleotide-sugar uncharacterized transporter 2 isoform X1 [Oryza sativa Japonica Group]
Os11g0176200	0.0468699	1.16406	up	Biological Process: developmental process involved in reproduction (GO:0003006);; Molecular Function: nucleic acid binding (GO:0003676);; Molecular Function: helicase activity (GO:0004386);; Cellular Component: cytoplasm (GO:0005737);; Biological Process: RNA metabolic process (GO:0016070);; Cellular Component: nuclear lumen (GO:0031981);; Molecular Function: purine ribonucleoside binding (GO:003…	K12598|0|osa:4349924|DExH-box ATP-dependent RNA helicase DExH10	DExH-box ATP-dependent RNA helicase DExH10 [Oryza sativa Japonica Group]
Os01g0383700	0.00173739	-2.23078	down	--	K11801|0|osa:9266898|LEC14B protein isoform X1	LEC14B homolog isoform X4 [Oryza sativa Japonica Group]
Os01g0245700	0.000756358	2.38544	up	--	--	Os01g0245700 [Oryza sativa Japonica Group]
Os06g0474500	0.00173739	-2.23078	down	--	--	uncharacterized protein LOC4341031 [Oryza sativa Japonica Group]
Os09g0402300	0.000756358	2.38544	up	Molecular Function: kinase activity (GO:0016301);; Molecular Function: purine ribonucleoside binding (GO:0032550);; Biological Process: phosphatidylinositol metabolic process (GO:0046488);;	K00921|0|osa:4347005|putative 1-phosphatidylinositol-3-phosphate 5-kinase FAB1C	hypothetical protein OsJ_29297 [Oryza sativa Japonica Group]
Os07g0209201	0.0468699	1.16406	up	--	K06617|0|osa:4342703|probable galactinol--sucrose galactosyltransferase 2 isoform X1	hypothetical protein OsJ_23523 [Oryza sativa Japonica Group]
Os08g0115200	0.00408516	-2.02382	down	--	--	protein IQ-DOMAIN 1 [Oryza sativa Japonica Group]
Os02g0157100	0.000756358	2.38544	up	Molecular Function: kinase activity (GO:0016301);;	--	receptor like protein 3 [Brachypodium distachyon]
Os07g0520900	0.00408516	-2.02382	down	Biological Process: lipid metabolic process (GO:0006629);; Biological Process: jasmonic acid metabolic process (GO:0009694);; Molecular Function: lipase activity (GO:0016298);; Biological Process: response to other organism (GO:0051707);;	--	phospholipase A I [Oryza sativa Japonica Group]
Os03g0266900	0.00408516	-2.02382	down	Biological Process: response to reactive oxygen species (GO:0000302);; Biological Process: response to metal ion (GO:0010038);; Cellular Component: intracellular membrane-bounded organelle (GO:0043231);; Biological Process: response to alcohol (GO:0097305);;	K13993|5.1765e-71|osa:4332360|17.4 kDa class I heat shock protein	17.4 kDa class I heat shock protein [Oryza sativa Japonica Group]
Os06g0716600	0.029319	-4.7326	down	Molecular Function: hydrolase activity (GO:0016787);; Cellular Component: intracellular ribonucleoprotein complex (GO:0030529);;	--	Os06g0716600 [Oryza sativa Japonica Group]
Os01g0576000	0.0468699	1.16406	up	--	--	hypothetical protein OsJ_02319 [Oryza sativa Japonica Group]
Os01g0561500	0.0264601	1.02974	up	Cellular Component: intracellular membrane-bounded organelle (GO:0043231);;	--	Os01g0561500 [Oryza sativa Japonica Group]
Os11g0351555	0.0468699	1.16406	up	Molecular Function: cofactor binding (GO:0048037);;	K22419|0|osa:107275612|3-oxo-Delta(4,5)-steroid 5-beta-reductase-like	hypothetical protein OsI_12184 [Oryza sativa Indica Group]
Os11g0691300	0.0191364	-2.57341	down	--	--	wall-associated receptor kinase 3 [Oryza sativa Japonica Group]
Os06g0163000	0.0191364	-2.57341	down	Molecular Function: protein kinase activity (GO:0004672);; Molecular Function: ubiquitin-like protein transferase activity (GO:0019787);; Biological Process: protein modification by small protein conjugation (GO:0032446);; Molecular Function: purine ribonucleoside binding (GO:0032550);;	--	U-box domain-containing protein 70-like [Oryza sativa Japonica Group]
Os09g0348766	0.00408516	-2.02382	down	Molecular Function: protein kinase activity (GO:0004672);; Biological Process: cellular protein modification process (GO:0006464);; Biological Process: phosphate-containing compound metabolic process (GO:0006796);; Cellular Component: intrinsic component of membrane (GO:0031224);; Molecular Function: purine ribonucleoside binding (GO:0032550);; Cellular Component: intracellular membrane-bounded o…	--	hypothetical protein OsJ_29007 [Oryza sativa Japonica Group]
Os10g0479800	0.0191364	-2.57341	down	--	--	Os10g0479800, partial [Oryza sativa Japonica Group]
Os03g0297900	0.0180158	1.16406	up,down	--	--	Os03g0297900 [Oryza sativa Japonica Group]
Os06g0671150	0.0191364	-2.57341	down	Biological Process: response to hormone (GO:0009725);; Cellular Component: intracellular membrane-bounded organelle (GO:0043231);;	K14488|7.13481e-19|osa:9271403|auxin-responsive protein SAUR71	hypothetical protein OsI_24070 [Oryza sativa Indica Group]
Os03g0736500	0.00408516	-2.02382	down	--	K08486|0|osa:107276918|syntaxin-related protein KNOLLE-like	hypothetical protein OsI_13428 [Oryza sativa Indica Group]
Os03g0127600	0.00567533	-1.538	down	Molecular Function: nucleic acid binding transcription factor activity (GO:0001071);; Biological Process: transcription, DNA-templated (GO:0006351);;	--	myosin-11 isoform X2 [Oryza sativa Japonica Group]
Os03g0271400	0.0327062	-2.43442	down	--	K09562|0|osa:4332391|uncharacterized protein LOC4332391 isoform X1	uncharacterized protein LOC4332391 isoform X1 [Oryza sativa Japonica Group]
Os01g0817650	0.00408516	-2.02382	down	--	--	protein LURP-one-related 8 [Oryza sativa Japonica Group]
Os08g0494300	0.0327062	-2.43442	down	Molecular Function: catalytic activity (GO:0003824);; Molecular Function: transition metal ion binding (GO:0046914);;	K16280|0|osa:4345919|E3 ubiquitin-protein ligase RGLG2	E3 ubiquitin-protein ligase RGLG2 [Oryza sativa Japonica Group]
Os09g0463232	0.00408516	-2.02382	down	--	--	hypothetical protein OsI_31678 [Oryza sativa Indica Group]
Os01g0781200	0.0446808	-1.61499	down	Molecular Function: purine ribonucleoside binding (GO:0032550);;	--	disease resistance protein RGA2 isoform X1 [Oryza sativa Japonica Group]
Os01g0665200	0.0264601	1.02974	up	Molecular Function: signal transducer, downstream of receptor, with serine/threonine kinase activity (GO:0004702);; Biological Process: cellular protein modification process (GO:0006464);; Biological Process: phosphate-containing compound metabolic process (GO:0006796);; Molecular Function: purine ribonucleoside binding (GO:0032550);; Biological Process: intracellular signal transduction (GO:0035…	--	mitogen-activated protein kinase 8 isoform X1 [Oryza sativa Japonica Group]
Os02g0812400	0.00173739	-2.23078	down	Biological Process: translation (GO:0006412);; Molecular Function: translation factor activity, RNA binding (GO:0008135);; Molecular Function: transferase activity, transferring phosphorus-containing groups (GO:0016772);;	K03240|0|osa:4331104|translation initiation factor eIF-2B subunit epsilon	translation initiation factor eIF-2B subunit epsilon [Oryza sativa Japonica Group]
Os12g0154600	0.0446808	-1.61499	down	Cellular Component: intrinsic component of membrane (GO:0031224);;	--	UDP-rhamnose/UDP-galactose transporter 4 [Oryza sativa Japonica Group]
Os07g0179700	0.0327062	-2.43442	down	--	--	Os07g0179700, partial [Oryza sativa Japonica Group]
Os11g0481500	0.00408516	-2.02382	down	--	--	expressed protein [Oryza sativa Japonica Group]
Os07g0474700	0.0174232	1.36286	up	Biological Process: polysaccharide biosynthetic process (GO:0000271);; Molecular Function: UDP-glycosyltransferase activity (GO:0008194);; Biological Process: homogalacturonan metabolic process (GO:0010394);; Cellular Component: Golgi apparatus part (GO:0044431);; Biological Process: external encapsulating structure organization (GO:0045229);;	--	Os07g0474700, partial [Oryza sativa Japonica Group]
Os02g0764700	0.00408516	-2.02382	down	Molecular Function: nucleic acid binding transcription factor activity (GO:0001071);; Molecular Function: nucleic acid binding (GO:0003676);; Biological Process: transcription, DNA-templated (GO:0006351);; Cellular Component: intracellular membrane-bounded organelle (GO:0043231);;	--	ethylene-responsive transcription factor ERF109 [Oryza sativa Japonica Group]
Os10g0420200	0.00408516	-2.02382	down	Cellular Component: intracellular membrane-bounded organelle (GO:0043231);;	--	Os10g0420200 [Oryza sativa Japonica Group]
Os02g0653200	0.0468699	1.16406	up	--	--	Os02g0653200, partial [Oryza sativa Japonica Group]
Os10g0397400	0.0468699	1.16406	up	Molecular Function: nucleotide binding (GO:0000166);; Molecular Function: oxidoreductase activity (GO:0016491);; Cellular Component: intrinsic component of membrane (GO:0031224);; Biological Process: single-organism metabolic process (GO:0044710);;	K09828|0|osa:4348555|delta(24)-sterol reductase	delta(24)-sterol reductase [Oryza sativa Japonica Group]
Os02g0272900	0.00173739	-2.23078	down	Molecular Function: purine ribonucleoside binding (GO:0032550);;	--	disease resistance protein RGA5-like isoform X2 [Oryza sativa Japonica Group]
Os10g0377300	0.0327062	-2.43442	down	Molecular Function: nucleic acid binding transcription factor activity (GO:0001071);; Molecular Function: DNA binding (GO:0003677);; Biological Process: transcription, DNA-templated (GO:0006351);; Cellular Component: intracellular membrane-bounded organelle (GO:0043231);;	--	homeobox-leucine zipper protein HOX8 [Oryza sativa Japonica Group]
Os12g0568350	0.029319	-4.7326	down	Cellular Component: intrinsic component of membrane (GO:0031224);; Molecular Function: cation binding (GO:0043169);;	--	F-box domain containing protein [Oryza sativa Japonica Group]
Os03g0166800	0.0468699	1.16406	up	Molecular Function: nuclease activity (GO:0004518);; Biological Process: nucleic acid metabolic process (GO:0090304);;	K12603|0|osa:4331740|carbon catabolite repressor protein 4 homolog 1	carbon catabolite repressor protein 4 homolog 1 [Oryza sativa Japonica Group]
Os01g0135800	0.00408516	-2.02382	down	Biological Process: response to stress (GO:0006950);; Cellular Component: intracellular part (GO:0044424);;	K13993|3.04451e-103|osa:4325694|16.6 kDa heat shock protein	16.6 kDa heat shock protein [Oryza sativa Japonica Group]
Os07g0626300	0.0327062	-2.43442	down	Biological Process: autophagy (GO:0006914);;	--	unknown protein [Oryza sativa Japonica Group]
Os04g0685900	0.0191364	-2.57341	down	Molecular Function: protein kinase activity (GO:0004672);; Biological Process: cellular protein modification process (GO:0006464);; Biological Process: phosphate-containing compound metabolic process (GO:0006796);; Cellular Component: intrinsic component of membrane (GO:0031224);; Molecular Function: purine ribonucleoside binding (GO:0032550);;	--	receptor protein kinase TMK1 [Oryza sativa Japonica Group]
Os06g0266400	0.0468699	1.16406	up	--	--	basic blue protein [Oryza sativa Japonica Group]
Os01g0587400	0.00408516	-2.02382	down	--	--	G-type lectin S-receptor-like serine/threonine-protein kinase At2g19130 isoform X1 [Oryza sativa Japonica Group]
Os01g0781700	0.0118521	-1.93749	down	Molecular Function: purine ribonucleoside binding (GO:0032550);;	--	Os01g0781700 [Oryza sativa Japonica Group]
Os11g0664500	0.0468699	1.16406	up	Molecular Function: protein binding (GO:0005515);; Biological Process: response to stimulus (GO:0050896);;	--	uncharacterized protein LOC4351072 isoform X3 [Oryza sativa Japonica Group]
Os02g0326100	0.0327501	-1.30477	down	Cellular Component: intrinsic component of membrane (GO:0031224);;	--	Os02g0326100, partial [Oryza sativa Japonica Group]
Os07g0631000	0.00173739	-2.23078	down	--	K17822|0|osa:4343995|defective in cullin neddylation protein 1	defective in cullin neddylation protein 1 [Oryza sativa Japonica Group]
Os06g0211300	0.029319	-4.7326	down	Biological Process: cellular aldehyde metabolic process (GO:0006081);; Biological Process: response to hormone (GO:0009725);; Cellular Component: microbody (GO:0042579);; Biological Process: single-multicellular organism process (GO:0044707);;	--	non-specific lipid-transfer protein-like 1 [Oryza sativa Japonica Group]
Os07g0599201	0.00173739	-2.23078	down	Molecular Function: purine ribonucleoside binding (GO:0032550);;	--	putative disease resistance protein RPH8A [Oryza sativa Japonica Group]
Os03g0708400	0.029319	-4.7326	down	--	--	uncharacterized protein LOC4333864 [Oryza sativa Japonica Group]
Os08g0426000	0.0327501	-1.30477	down	--	--	Os08g0426000, partial [Oryza sativa Japonica Group]
Os01g0612700	0.0357617	1.315	up	Biological Process: defense response (GO:0006952);; Biological Process: growth (GO:0040007);; Cellular Component: intracellular membrane-bounded organelle (GO:0043231);;	--	protein LOL5 [Oryza sativa Japonica Group]
Os04g0180900	0.00408516	-2.02382	down	--	--	Os04g0180900 [Oryza sativa Japonica Group]
Os02g0195500	0.0357617	1.315	up	--	K09955|0|osa:4328608|uncharacterized protein LOC4328608	uncharacterized protein LOC4328608 [Oryza sativa Japonica Group]
Os08g0513300	0.00173739	-2.23078	down	--	K17413|0|osa:4346021|uncharacterized protein LOC4346021	uncharacterized protein LOC4346021 [Oryza sativa Japonica Group]
Os01g0910200	0.029319	-4.7326	down	--	--	Os01g0910200 [Oryza sativa Japonica Group]
Os03g0782200	0.029319	-4.7326	down	--	--	hypothetical protein EE612_009330 [Oryza sativa]
Os11g0629300	0.00685007	-2.19785	down	--	--	E3 ubiquitin-protein ligase At3g02290 [Oryza sativa Japonica Group]
Os03g0262500	0.000756358	2.38544	up	Biological Process: gravitropism (GO:0009630);;	--	Os03g0262500, partial [Oryza sativa Japonica Group]
Os03g0267200	0.00408516	-2.02382	down	Biological Process: response to reactive oxygen species (GO:0000302);; Biological Process: response to metal ion (GO:0010038);; Cellular Component: intracellular membrane-bounded organelle (GO:0043231);; Biological Process: response to alcohol (GO:0097305);;	K13993|3.54473e-88|osa:4332363|17.7 kDa class I heat shock protein	17.7 kDa class I heat shock protein [Oryza sativa Japonica Group]
Os12g0109375	0.0468699	1.16406	up	Cellular Component: intrinsic component of membrane (GO:0031224);; Molecular Function: transition metal ion binding (GO:0046914);;	--	pentatricopeptide, putative, expressed [Oryza sativa Japonica Group]
Os10g0541000	0.029319	-4.7326	down	--	--	Os10g0541000, partial [Oryza sativa Japonica Group]
Os12g0207200	0.029319	-4.7326	down	Cellular Component: intracellular membrane-bounded organelle (GO:0043231);;	--	Os12g0207200, partial [Oryza sativa Japonica Group]
Os01g0852100	0.0191364	-2.57341	down	Molecular Function: protein kinase activity (GO:0004672);; Biological Process: cellular protein modification process (GO:0006464);; Biological Process: phosphate-containing compound metabolic process (GO:0006796);; Biological Process: transport (GO:0006810);; Cellular Component: intrinsic component of membrane (GO:0031224);; Molecular Function: purine ribonucleoside binding (GO:0032550);; Cellula…	--	calmodulin-binding receptor-like cytoplasmic kinase 2 isoform X2 [Oryza sativa Japonica Group]
Os01g0861400	0.000756358	2.38544	up	--	--	Os01g0861400 [Oryza sativa Japonica Group]
Os01g0623550	0.000756358	2.38544	up	--	--	Spastin [Dichanthelium oligosanthes]
Os08g0560500	0.00408516	-2.02382	down	Molecular Function: carboxypeptidase activity (GO:0004180);; Biological Process: proteolysis (GO:0006508);;	K09646|0|osa:4346323|serine carboxypeptidase-like 51	serine carboxypeptidase-like 51 [Oryza sativa Japonica Group]
Os07g0155600	0.0327062	-2.43442	down	Biological Process: phosphorelay signal transduction system (GO:0000160);; Molecular Function: catalytic activity (GO:0003824);; Biological Process: response to stress (GO:0006950);; Molecular Function: antioxidant activity (GO:0016209);; Cellular Component: intrinsic component of membrane (GO:0031224);; Molecular Function: cation binding (GO:0043169);; Cellular Component: cell part (GO:0044464);…	K14513|0|osa:4342431|ethylene-insensitive protein 2	protein ETHYLENE-INSENSITIVE 2 [Oryza sativa Japonica Group]
Os05g0529700	0.0446808	-1.61499	down	Cellular Component: intracellular membrane-bounded organelle (GO:0043231);; Molecular Function: transition metal ion binding (GO:0046914);;	--	hypothetical protein OsI_20727 [Oryza sativa Indica Group]
Os06g0543601	0.0327062	-2.43442	down	Cellular Component: membrane (GO:0016020);; Cellular Component: intracellular membrane-bounded organelle (GO:0043231);;	--	hypothetical protein [Oryza sativa Japonica Group]
Os03g0808100	0.0357617	1.315	up	Molecular Function: protein kinase activity (GO:0004672);; Biological Process: cellular protein modification process (GO:0006464);; Biological Process: phosphate-containing compound metabolic process (GO:0006796);; Molecular Function: cellulose synthase activity (GO:0016759);; Biological Process: cellulose metabolic process (GO:0030243);; Cellular Component: intrinsic component of membrane (GO:00…	K10999|0|osa:4334515|probable cellulose synthase A catalytic subunit 2 [UDP-forming]	probable cellulose synthase A catalytic subunit 2 [UDP-forming] [Oryza sativa Japonica Group]
Os07g0681600	0.00408516	-2.02382	down	--	--	uncharacterized protein LOC4344306 [Oryza sativa Japonica Group]
Os06g0474900	0.00173739	-2.23078	down	--	--	protein MICRORCHIDIA 6 isoform X5 [Oryza sativa Japonica Group]
Os07g0578600	0.0304813	1.87352	up	--	K01934|9.3664e-155|osa:4343714|5-formyltetrahydrofolate cyclo-ligase, mitochondrial	5-formyltetrahydrofolate cyclo-ligase, mitochondrial [Oryza sativa Japonica Group]
Os10g0399901	0.029319	-4.7326	down	--	--	Os10g0399901, partial [Oryza sativa Japonica Group]
Os01g0812000	0.0264601	1.02974	up	Molecular Function: nucleic acid binding (GO:0003676);; Biological Process: transcription, DNA-templated (GO:0006351);; Cellular Component: intracellular membrane-bounded organelle (GO:0043231);; Biological Process: cellular developmental process (GO:0048869);; Biological Process: reproductive shoot system development (GO:0090567);;	K09422|0|osa:4327362|transcription factor GAMYB	putative transcription factor GAMyb [Oryza sativa Japonica Group]
Os03g0798300	0.00567533	-1.538	down	Molecular Function: nucleic acid binding (GO:0003676);; Molecular Function: S-adenosylmethionine-dependent methyltransferase activity (GO:0008757);; Biological Process: negative regulation of gene expression (GO:0010629);; Biological Process: DNA methylation on cytosine (GO:0032776);; Cellular Component: intracellular membrane-bounded organelle (GO:0043231);; Molecular Function: macromolecular co…	K00558|0|osa:4334435|DNA (cytosine-5)-methyltransferase 1A	DNA (cytosine-5)-methyltransferase 1A [Oryza sativa Japonica Group]
Os12g0601800	0.029319	-4.7326	down	Molecular Function: nucleic acid binding transcription factor activity (GO:0001071);; Molecular Function: DNA binding (GO:0003677);; Biological Process: transcription, DNA-templated (GO:0006351);;	--	light-inducible protein CPRF2 isoform X3 [Oryza sativa Japonica Group]
Os01g0894075	0.000756358	1.315	up	Cellular Component: intracellular membrane-bounded organelle (GO:0043231);;	--	hypothetical protein OsJ_35831 [Oryza sativa Japonica Group]
Os05g0469600	0.0319595	2.45777	up	Molecular Function: carboxy-lyase activity (GO:0016831);; Molecular Function: vitamin binding (GO:0019842);; Cellular Component: intracellular membrane-bounded organelle (GO:0043231);; Molecular Function: metal ion binding (GO:0046872);;	K01568|0|osa:4339066|pyruvate decarboxylase 1	pyruvate decarboxylase 1 isoform X2 [Oryza sativa Japonica Group]
Os07g0436350	0.00058162	2.35229	up	--	--	Os07g0436350, partial [Oryza sativa Japonica Group]
Os12g0467200	0.00408516	-2.02382	down	Molecular Function: catalytic activity (GO:0003824);;	--	uncharacterized protein LOC4352192 [Oryza sativa Japonica Group]
Os03g0273200	0.0357617	1.315	up	--	K05909|0|osa:4332400|laccase-10	laccase-10 [Oryza sativa Japonica Group]
Os09g0420900	0.0327501	-1.30477	down	Biological Process: cell communication (GO:0007154);; Biological Process: hormone transport (GO:0009914);; Biological Process: system development (GO:0048731);;	--	BTB/POZ domain-containing protein NPY1 [Oryza sativa Japonica Group]
Os02g0272100	0.0468699	1.16406	up	--	--	Os02g0272100 [Oryza sativa Japonica Group]
Os05g0357200	0.000756358	2.38544	up	--	K15115|0|osa:4338524|nicotinamide adenine dinucleotide transporter 1, chloroplastic	hypothetical protein OsJ_18207 [Oryza sativa Japonica Group]
Os11g0163600	0.000756358	2.38544	up	--	--	tubby-like F-box protein 13 isoform X1 [Oryza sativa Japonica Group]
Os09g0467300	0.00408516	-2.02382	down	Cellular Component: intrinsic component of membrane (GO:0031224);; Biological Process: establishment of localization (GO:0051234);;	--	unnamed protein product [Oryza sativa Japonica Group]
Os12g0126600	0.029319	-4.7326	down	--	--	Os12g0126600, partial [Oryza sativa Japonica Group]
Os01g0290100	0.0164037	-1.90398	down	Molecular Function: catalytic activity (GO:0003824);;	K22207|0|osa:4325155|putative L-cysteine desulfhydrase 1 isoform X1	putative L-cysteine desulfhydrase 1 isoform X1 [Oryza sativa Japonica Group]
Os03g0214100	0.00058162	2.35229	up	Molecular Function: nucleic acid binding (GO:0003676);; Biological Process: DNA metabolic process (GO:0006259);; Biological Process: cellular response to stress (GO:0033554);; Molecular Function: cation binding (GO:0043169);; Cellular Component: intracellular membrane-bounded organelle (GO:0043231);; Cellular Component: protein complex (GO:0043234);;	K07466|0|osa:4332052|replication protein A 70 kDa DNA-binding subunit B	replication protein A 70 kDa DNA-binding subunit B [Oryza sativa Japonica Group]
Os09g0492900	0.00408516	-2.02382	down	--	--	uncharacterized protein LOC4347444 [Oryza sativa Japonica Group]
Os05g0155000	0.0327501	-1.30477	down	Cellular Component: cell-cell junction (GO:0005911);; Molecular Function: oxidoreductase activity, acting on the CH-OH group of donors, NAD or NADP as acceptor (GO:0016616);; Molecular Function: hydro-lyase activity (GO:0016836);; Cellular Component: external encapsulating structure (GO:0030312);; Cellular Component: nuclear lumen (GO:0031981);; Biological Process: monocarboxylic acid metabolic p…	K10527|0|osa:4337848|glyoxysomal fatty acid beta-oxidation multifunctional protein MFP-a	glyoxysomal fatty acid beta-oxidation multifunctional protein MFP-a [Oryza sativa Japonica Group]
Os02g0789150	0.0164037	-1.90398	down	--	K05391|0|osa:4330967|probable cyclic nucleotide-gated ion channel 17	cyclic nucleotide-gated ion channel 17 [Oryza sativa Japonica Group]
Os05g0458600	0.0357617	1.315	up	Cellular Component: extracellular region (GO:0005576);; Biological Process: lignin metabolic process (GO:0009808);; Molecular Function: oxidoreductase activity, acting on diphenols and related substances as donors, oxygen as acceptor (GO:0016682);; Molecular Function: transition metal ion binding (GO:0046914);;	K05909|0|osa:4339003|laccase-12/13	laccase-13 [Oryza sativa Japonica Group]
Os01g0505500	0.00173739	-2.23078	down	--	--	pentatricopeptide repeat-containing protein At1g71060, mitochondrial [Oryza sativa Japonica Group]
Os01g0233900	0.00408516	-2.02382	down	--	--	Os01g0233900, partial [Oryza sativa Japonica Group]
Os04g0656500	0.00408516	-2.02382	down	Molecular Function: nucleic acid binding (GO:0003676);; Biological Process: transcription, DNA-templated (GO:0006351);; Molecular Function: cation binding (GO:0043169);; Cellular Component: intracellular membrane-bounded organelle (GO:0043231);;	--	squamosa promoter-binding-like protein 8 [Oryza sativa Japonica Group]
Os10g0567200	0.00058162	2.35229	up	Cellular Component: thylakoid (GO:0009579);; Cellular Component: chloroplast envelope (GO:0009941);; Cellular Component: membrane (GO:0016020);; Molecular Function: oxidoreductase activity, acting on single donors with incorporation of molecular oxygen, incorporation of one atom of oxygen (internal monooxygenases or internal mixed function oxidases) (GO:0016703);; Biological Process: single-organ…	K13600|9.54991e-115|osa:4349430|chlorophyllide a oxygenase, chloroplastic-like	chlorophyllide a oxygenase, chloroplastic-like isoform X2 [Oryza sativa Japonica Group]
Os03g0259100	0.0468699	1.16406	up	--	--	putative chemocyanin precursor, partial [Oryza sativa Japonica Group]
Os03g0709100	0.0468699	1.16406	up	--	--	basic blue protein [Oryza sativa Japonica Group]
Os01g0651200	0.029319	-4.7326	down	Molecular Function: phospholipase activity (GO:0004620);; Biological Process: lipid metabolic process (GO:0006629);; Cellular Component: intracellular part (GO:0044424);;	--	Os01g0651200, partial [Oryza sativa Japonica Group]
Os03g0607400	0.0357617	1.315	up	Cellular Component: intrinsic component of membrane (GO:0031224);; Biological Process: establishment of localization (GO:0051234);;	K21398|2.12604e-159|osa:4333420|metal transporter Nramp6-like	metal transporter Nramp6-like [Oryza sativa Japonica Group]
Os03g0267000	0.00408516	-2.02382	down	Biological Process: response to reactive oxygen species (GO:0000302);; Biological Process: response to metal ion (GO:0010038);; Cellular Component: intracellular membrane-bounded organelle (GO:0043231);; Biological Process: response to alcohol (GO:0097305);;	K13993|1.42413e-67|osa:4332361|18.1 kDa class I heat shock protein	18.1 kDa class I heat shock protein [Oryza sativa Japonica Group]
Os01g0510800	0.00173739	-2.23078	down	Biological Process: regulation of transcription, DNA-templated (GO:0006355);; Cellular Component: intracellular membrane-bounded organelle (GO:0043231);; Molecular Function: protein dimerization activity (GO:0046983);;	K03131|0|osa:4324027|transcription initiation factor TFIID subunit 6	transcription initiation factor TFIID subunit 6 [Oryza sativa Japonica Group]
Os06g0237100	0.0330586	-1.14032	down	Cellular Component: intracellular membrane-bounded organelle (GO:0043231);;	--	uncharacterized protein LOC4340603 [Oryza sativa Japonica Group]
Os01g0503400	0.0248093	-1.97024	down	Biological Process: transport (GO:0006810);; Cellular Component: intrinsic component of membrane (GO:0031224);; Biological Process: transition metal ion homeostasis (GO:0055076);;	--	unnamed protein product [Oryza sativa Japonica Group]
Os05g0458500	0.0357617	1.315	up	Cellular Component: extracellular region (GO:0005576);; Biological Process: lignin metabolic process (GO:0009808);; Molecular Function: oxidoreductase activity, acting on diphenols and related substances as donors, oxygen as acceptor (GO:0016682);; Molecular Function: transition metal ion binding (GO:0046914);;	K05909|0|osa:4339003|laccase-12/13	laccase-13 [Oryza sativa Japonica Group]
Os01g0177900	0.00173739	-2.23078	down	--	--	RecName: Full=ABC transporter G family member 31; Short=OsABCG31; AltName: Full=Pleiotropic drug resistance protein 6; Short=OsPDR6
Os01g0221500	0.00408516	-2.02382	down	--	--	uncharacterized protein LOC4324652 [Oryza sativa Japonica Group]
Os06g0146600	0.000756358	2.38544	up	Cellular Component: intrinsic component of membrane (GO:0031224);;	--	Os06g0146650, partial [Oryza sativa Japonica Group]
Os11g0454800	0.0327501	-1.30477	down	Biological Process: phosphate-containing compound metabolic process (GO:0006796);; Molecular Function: transferase activity, transferring phosphorus-containing groups (GO:0016772);;	--	Os11g0454800 [Oryza sativa Japonica Group]
Os12g0138800	0.0174232	1.36286	up	--	--	Strictosidine synthase family protein, expressed [Oryza sativa Japonica Group]
Os02g0237801	0.0174232	1.36286	up	--	--	Os02g0237801 [Oryza sativa Japonica Group]
Os09g0469300	0.0468699	1.16406	up	--	--	mavicyanin [Oryza sativa Japonica Group]
Os03g0644000	0.029319	-4.7326	down	--	K08334|0|osa:4333557|beclin-1-like protein	beclin-1-like protein [Oryza sativa Japonica Group]
Os06g0565150	0.00408516	-2.02382	down	--	K20771|1.28832e-170|ats:109742391|LOC109742391; cytochrome P450 711A1-like	hypothetical protein OsI_23403 [Oryza sativa Indica Group]
Os03g0726300	0.0304813	1.87352	up	Cellular Component: intrinsic component of membrane (GO:0031224);;	K21989|0|osa:4333968|CSC1-like protein RXW8	CSC1-like protein RXW8 [Oryza sativa Japonica Group]
Os03g0598900	0.00173739	-2.23078	down	Cellular Component: cytoplasm (GO:0005737);; Molecular Function: disulfide oxidoreductase activity (GO:0015036);; Molecular Function: purine ribonucleoside binding (GO:0032550);; Cellular Component: intracellular membrane-bounded organelle (GO:0043231);; Biological Process: single-organism metabolic process (GO:0044710);; Biological Process: defense response to fungus (GO:0050832);;	--	uncharacterized protein LOC4333388 isoform X1 [Oryza sativa Japonica Group]
Os02g0820000	0.00567533	-1.538	down	--	K06269|0|osa:4331166|serine/threonine-protein phosphatase PP1	Os02g0820000, partial [Oryza sativa Japonica Group]
Os01g0634500	0.0357617	1.315	up	--	K05909|0|osa:107276614|laccase-2	laccase-2 [Oryza sativa Japonica Group]
Os07g0194500	0.0468699	1.16406	up	Molecular Function: oxidoreductase activity (GO:0016491);; Molecular Function: vitamin binding (GO:0019842);; Cellular Component: intrinsic component of membrane (GO:0031224);; Cellular Component: intracellular membrane-bounded organelle (GO:0043231);; Biological Process: single-organism metabolic process (GO:0044710);; Molecular Function: transition metal ion binding (GO:0046914);;	K00472|0|osa:4342642|probable prolyl 4-hydroxylase 6	probable prolyl 4-hydroxylase 6 [Oryza sativa Japonica Group]
Os05g0126700	0.029319	-4.7326	down	Cellular Component: intrinsic component of membrane (GO:0031224);; Cellular Component: intracellular membrane-bounded organelle (GO:0043231);;	--	unknown protein [Oryza sativa Japonica Group]
Os01g0855400	0.00408516	-2.02382	down	Molecular Function: nucleic acid binding (GO:0003676);;	--	transcription factor MYB73 [Oryza sativa Japonica Group]
Os04g0297933	0.0191364	-2.57341	down	--	--	Os04g0297933 [Oryza sativa Japonica Group]
Os04g0563050	0.0191364	-2.57341	down	Cellular Component: intrinsic component of membrane (GO:0031224);; Cellular Component: intracellular membrane-bounded organelle (GO:0043231);;	--	Os04g0563000, partial [Oryza sativa Japonica Group]
Os08g0506000	0.0118521	-1.93749	down	--	--	uncharacterized protein LOC4345979 isoform X2 [Oryza sativa Japonica Group]
Os06g0177600	0.029319	-4.7326	down	--	--	Os06g0176300 [Oryza sativa Japonica Group]
Os06g0204800	0.00173739	-2.23078	down	--	--	growth-regulating factor 2 [Oryza sativa Japonica Group]
Os11g0691100	0.0191364	-2.57341	down	--	--	Os11g0691100 [Oryza sativa Japonica Group]
Os11g0103150	0.0357617	1.315	up	Biological Process: cellular protein modification process (GO:0006464);; Molecular Function: kinase activity (GO:0016301);; Molecular Function: purine ribonucleoside binding (GO:0032550);;	--	uncharacterized protein LOC4349538 isoform X1 [Oryza sativa Japonica Group]
Os06g0727600	0.00173739	-2.23078	down	Cellular Component: intracellular membrane-bounded organelle (GO:0043231);;	--	Os06g0727600 [Oryza sativa Japonica Group]
Os08g0472600	0.029319	-4.7326	down	Cellular Component: Golgi membrane (GO:0000139);; Biological Process: cellular protein modification process (GO:0006464);; Cellular Component: intrinsic component of membrane (GO:0031224);; Molecular Function: alpha-(1->3)-fucosyltransferase activity (GO:0046920);; Biological Process: glycosylation (GO:0070085);;	K00753|0|osa:4345809|glycoprotein 3-alpha-L-fucosyltransferase A	glycoprotein 3-alpha-L-fucosyltransferase A [Oryza sativa Japonica Group]
Os01g0617700	0.0248093	-1.97024	down	--	--	uncharacterized protein LOC4326608 isoform X1 [Oryza sativa Japonica Group]
Os03g0603200	0.00408516	-2.02382	down	--	--	cytochrome P450 78A5 [Oryza sativa Japonica Group]
Os11g0580000	0.00567533	-1.538	down	Cellular Component: intrinsic component of membrane (GO:0031224);;	--	protein SINE1 [Oryza sativa Japonica Group]
Os06g0105350	0.0319595	2.45777	up	--	--	scarecrow-like protein 6 [Oryza sativa Japonica Group]
Os01g0393300	0.0248093	-1.97024	down	--	--	Os01g0393300, partial [Oryza sativa Japonica Group]
Os09g0414600	0.0174232	1.36286	up	--	--	Os09g0414600 [Oryza sativa Japonica Group]
Os10g0482000	0.0180158	-1.40677	down	--	--	Os10g0482000 [Oryza sativa Japonica Group]
Os02g0758800	0.0468699	1.16406	up	--	--	blue copper protein [Oryza sativa Japonica Group]
Os03g0100900	0.0118521	-1.93749	down	--	--	deSI-like protein At4g17486 isoform X2 [Oryza sativa Japonica Group]
Os07g0537600	0.00173739	-2.23078	down	--	--	putative receptor-like protein kinase At4g00960 isoform X1 [Oryza sativa Japonica Group]
Os07g0108100	0.00408516	-2.02382	down	--	--	Os07g0108100 [Oryza sativa Japonica Group]
Os01g0176900	0.00408516	-2.02382	down	--	--	Os01g0176900 [Oryza sativa Japonica Group]
Os05g0528200	0.00173739	-2.23078	down	--	K02887|3.78048e-82|osa:4339398|50S ribosomal protein L20	hypothetical protein OsI_20708 [Oryza sativa Indica Group]
Os06g0340200	0.029319	-4.7326	down	Cellular Component: intrinsic component of membrane (GO:0031224);; Molecular Function: transition metal ion binding (GO:0046914);;	--	uncharacterized protein LOC9266525 [Oryza sativa Japonica Group]
Os06g0245800	0.00408516	-2.02382	down	--	K01872|0|osa:9266147|alanine--tRNA ligase, chloroplastic/mitochondrial	hypothetical protein OsJ_20798 [Oryza sativa Japonica Group]
Os01g0136200	0.00408516	-2.02382	down	Biological Process: protein complex assembly (GO:0006461);; Biological Process: response to stress (GO:0006950);; Cellular Component: intracellular part (GO:0044424);;	K13993|1.58709e-78|pda:103700494|16.9 kDa class I heat shock protein 2	16.9 kDa class I heat shock protein 2 [Phoenix dactylifera]
Os12g0561900	0.029319	-4.7326	down	Molecular Function: transferase activity, transferring glycosyl groups (GO:0016757);;	--	UDP-glycosyltransferase 91C1 [Oryza sativa Japonica Group]
Os08g0504000	0.000756358	2.38544	up	--	--	zinc finger protein WIP2 [Oryza sativa Japonica Group]
Os03g0188900	0.0327062	-2.43442	down	Molecular Function: nucleic acid binding transcription factor activity (GO:0001071);; Molecular Function: DNA binding (GO:0003677);; Biological Process: transcription, DNA-templated (GO:0006351);; Cellular Component: intracellular membrane-bounded organelle (GO:0043231);;	--	homeobox-leucine zipper protein HOX13 isoform X1 [Oryza sativa Japonica Group]
Os01g0220900	0.029319	-4.7326	down	--	--	Os01g0220900 [Oryza sativa Japonica Group]
Os02g0680400	0.029319	-4.7326	down	Molecular Function: endopeptidase activity (GO:0004175);; Biological Process: protein processing (GO:0016485);; Cellular Component: intrinsic component of membrane (GO:0031224);; Molecular Function: cation binding (GO:0043169);; Cellular Component: intracellular membrane-bounded organelle (GO:0043231);; Biological Process: cellular protein metabolic process (GO:0044267);;	K06013|0|osa:4330318|CAAX prenyl protease 1 homolog	CAAX prenyl protease 1 homolog [Oryza sativa Japonica Group]
Os04g0196200	0.029319	-4.7326	down	--	--	acetylserotonin O-methyltransferase 1-like [Oryza sativa Japonica Group]
Os08g0403300	0.00408516	-2.02382	down	--	--	heavy metal-associated isoprenylated plant protein 23 [Oryza sativa Japonica Group]
Os12g0626150	0.00408516	-2.02382	down	--	--	Os12g0626150 [Oryza sativa Japonica Group]
Os11g0184350	0.000756358	2.38544	up	--	--	Os11g0184200 [Oryza sativa Japonica Group]
Os11g0227700	0.029319	-4.7326	down	Molecular Function: purine ribonucleoside binding (GO:0032550);;	--	NB-ARC domain containing protein, expressed [Oryza sativa Japonica Group]
Os02g0717500	0.029319	-4.7326	down	--	--	uncharacterized protein LOC4330530 isoform X1 [Oryza sativa Japonica Group]
Os07g0118300	0.0304813	1.87352	up	Cellular Component: intrinsic component of membrane (GO:0031224);; Cellular Component: vacuolar part (GO:0044437);;	--	uncharacterized protein LOC4342264 [Oryza sativa Japonica Group]
Os06g0640599	0.0304813	1.87352	up	--	--	premnaspirodiene oxygenase [Oryza sativa Japonica Group]
Os12g0125550	0.00058162	2.35229	up	Molecular Function: secondary active transmembrane transporter activity (GO:0015291);; Biological Process: drug transport (GO:0015893);; Cellular Component: intrinsic component of membrane (GO:0031224);;	K03327|3.94079e-105|osa:107279322|protein DETOXIFICATION 21-like	MatE family protein, expressed [Oryza sativa Japonica Group]
Os08g0557100	0.0304813	1.87352	up	Cellular Component: viral capsid (GO:0019028);; Molecular Function: small molecule binding (GO:0036094);; Cellular Component: intracellular membrane-bounded organelle (GO:0043231);; Molecular Function: organic cyclic compound binding (GO:0097159);;	--	28 kDa ribonucleoprotein, chloroplastic [Oryza sativa Japonica Group]
Os01g0969200	0.0357617	1.315	up	Cellular Component: intracellular membrane-bounded organelle (GO:0043231);;	--	Os01g0969200, partial [Oryza sativa Japonica Group]
Os09g0468000	0.00173739	-2.23078	down	Molecular Function: secondary active transmembrane transporter activity (GO:0015291);; Biological Process: drug transport (GO:0015893);; Cellular Component: intrinsic component of membrane (GO:0031224);;	K03327|0|osa:4347324|protein DETOXIFICATION 27	protein DETOXIFICATION 27 [Oryza sativa Japonica Group]
Os06g0224900	0.00173739	-2.23078	down	Molecular Function: DNA binding (GO:0003677);; Biological Process: transcription, DNA-templated (GO:0006351);; Cellular Component: intracellular membrane-bounded organelle (GO:0043231);;	K15032|0|osa:4340540|uncharacterized protein LOC4340540	transcription termination factor MTEF1, chloroplastic [Oryza sativa Japonica Group]
Os04g0219000	0.000756358	2.38544	up	Biological Process: aminoglycan biosynthetic process (GO:0006023);; Biological Process: proteoglycan biosynthetic process (GO:0030166);; Cellular Component: intrinsic component of membrane (GO:0031224);; Cellular Component: intracellular membrane-bounded organelle (GO:0043231);;	--	Os04g0219000, partial [Oryza sativa Japonica Group]
Os03g0214900	0.000756358	2.38544	up	--	--	uncharacterized protein LOC4332056 isoform X1 [Oryza sativa Japonica Group]
Os03g0348800	0.029319	-4.7326	down	--	--	hypothetical protein OsI_11559 [Oryza sativa Indica Group]
Os02g0701300	0.00173739	-2.23078	down	--	--	growth-regulating factor 4 [Oryza sativa Japonica Group]
Os01g0877001	0.029319	-4.7326	down	--	--	Os01g0877100 [Oryza sativa Japonica Group]
Os02g0598200	0.0468699	1.16406	up	Molecular Function: nucleic acid binding (GO:0003676);; Biological Process: transcription, DNA-templated (GO:0006351);; Cellular Component: intracellular membrane-bounded organelle (GO:0043231);;	--	B3 domain-containing protein Os02g0598200 [Oryza sativa Japonica Group]
Os03g0803200	0.00408516	-2.02382	down	Cellular Component: intrinsic component of membrane (GO:0031224);;	--	hypothetical protein OsI_13948 [Oryza sativa Indica Group]
Os04g0504700	0.00408516	-2.02382	down	Molecular Function: DNA polymerase activity (GO:0034061);; Molecular Function: transition metal ion binding (GO:0046914);; Biological Process: DNA biosynthetic process (GO:0071897);; Molecular Function: organic cyclic compound binding (GO:0097159);;	--	Os04g0504700, partial [Oryza sativa Japonica Group]
Os05g0323100	0.00695975	-1.89191	down	Cellular Component: intracellular membrane-bounded organelle (GO:0043231);;	--	rhodanese-like domain-containing protein 7 [Oryza sativa Japonica Group]
Os02g0149600	0.0327501	-1.30477	down	Molecular Function: cation binding (GO:0043169);;	--	serrate RNA effector molecule isoform X1 [Oryza sativa Japonica Group]
Os05g0172300	0.029319	-4.7326	down	Molecular Function: nucleic acid binding (GO:0003676);; Molecular Function: protein binding (GO:0005515);; Biological Process: transcription, DNA-templated (GO:0006351);; Cellular Component: intrinsic component of membrane (GO:0031224);; Cellular Component: intracellular membrane-bounded organelle (GO:0043231);;	--	nitrate regulatory gene2 protein isoform X1 [Oryza sativa Japonica Group]
Os04g0160801	0.0304813	1.87352	up	Cellular Component: intracellular membrane-bounded organelle (GO:0043231);;	--	OSJNBa0032N05.24 [Oryza sativa Japonica Group]
Os03g0643900	0.029319	-4.7326	down	Biological Process: nuclear-transcribed mRNA catabolic process, deadenylation-dependent decay (GO:0000288);; Molecular Function: enzyme regulator activity (GO:0030234);; Cellular Component: intrinsic component of membrane (GO:0031224);; Cellular Component: intracellular membrane-bounded organelle (GO:0043231);; Biological Process: positive regulation of molecular function (GO:0044093);;	--	Os03g0643900, partial [Oryza sativa Japonica Group]
Os04g0432200	0.029319	-4.7326	down	Molecular Function: nucleoside-triphosphatase activity (GO:0017111);; Molecular Function: purine ribonucleoside binding (GO:0032550);; Cellular Component: intracellular membrane-bounded organelle (GO:0043231);;	K18995|3.11966e-52|osa:9267691|DExH-box ATP-dependent RNA helicase DExH7, chloroplastic isoform X1	hypothetical protein OsJ_14858 [Oryza sativa Japonica Group]
Os06g0136201	0.0174232	1.36286	up	Cellular Component: intrinsic component of membrane (GO:0031224);; Biological Process: establishment of localization (GO:0051234);;	--	hypothetical protein [Oryza sativa Japonica Group]
Os11g0569600	0.0264601	1.02974	up	Molecular Function: protein kinase activity (GO:0004672);; Biological Process: cellular protein modification process (GO:0006464);; Biological Process: phosphate-containing compound metabolic process (GO:0006796);; Biological Process: response to bacterium (GO:0009617);; Cellular Component: intrinsic component of membrane (GO:0031224);; Molecular Function: purine ribonucleoside binding (GO:003255…	--	receptor kinase-like protein Xa21 isoform X1 [Oryza sativa Japonica Group]
Os03g0213300	0.000756358	2.38544	up	--	--	hornerin isoform X2 [Oryza sativa Japonica Group]
Os02g0572900	0.00408516	-2.02382	down	--	--	protein SENSITIVE TO PROTON RHIZOTOXICITY 1 [Oryza sativa Japonica Group]
Os11g0569800	0.00837882	-1.66824	down	Molecular Function: protein kinase activity (GO:0004672);; Biological Process: cellular protein modification process (GO:0006464);; Biological Process: phosphate-containing compound metabolic process (GO:0006796);; Cellular Component: intrinsic component of membrane (GO:0031224);; Molecular Function: purine ribonucleoside binding (GO:0032550);;	--	Os11g0569800, partial [Oryza sativa Japonica Group]
Os11g0117700	0.0264601	1.02974	up	--	--	Os11g0117700, partial [Oryza sativa Japonica Group]
Os04g0609900	0.00173739	-2.23078	down	--	--	uncharacterized protein LOC4336942 [Oryza sativa Japonica Group]
Os01g0513900	0.0327501	-1.30477	down	--	K11498|0|osa:4323990|kinesin-like protein NACK1	kinesin-like protein KIN-7A [Oryza sativa Japonica Group]
Os01g0280600	0.0327062	-2.43442	down	Cellular Component: intracellular membrane-bounded organelle (GO:0043231);;	--	Os01g0280600, partial [Oryza sativa Japonica Group]
Os12g0614201	0.00367195	2.32894	up	Molecular Function: catalytic activity (GO:0003824);; Cellular Component: intracellular membrane-bounded organelle (GO:0043231);; Biological Process: primary metabolic process (GO:0044238);;	--	phospholipase A1-Igamma2, chloroplastic [Oryza sativa Japonica Group]
Os02g0678800	0.00173739	-2.23078	down	Biological Process: transcription, DNA-templated (GO:0006351);; Molecular Function: purine ribonucleoside binding (GO:0032550);; Cellular Component: intracellular membrane-bounded organelle (GO:0043231);;	--	growth-regulating factor 10 isoform X1 [Oryza sativa Japonica Group]
Os04g0105400	0.00567533	-1.538	down	Biological Process: transport (GO:0006810);; Cellular Component: intrinsic component of membrane (GO:0031224);;	--	Os04g0105400 [Oryza sativa Japonica Group]
Os09g0421200	0.00173739	-2.23078	down	Molecular Function: motor activity (GO:0003774);; Biological Process: microtubule-based process (GO:0007017);; Molecular Function: tubulin binding (GO:0015631);; Molecular Function: purine ribonucleoside binding (GO:0032550);;	--	Os09g0421200, partial [Oryza sativa Japonica Group]
Os06g0205250	0.0174232	1.36286	up	--	--	Os06g0205250 [Oryza sativa Japonica Group]
Os11g0691650	0.0191364	-2.57341	down	--	--	Os11g0691650 [Oryza sativa Japonica Group]
Os03g0145150	0.00408516	-2.02382	down	--	--	GATA transcription factor 3 [Oryza sativa Japonica Group]
Os11g0599100	0.029319	-4.7326	down	--	--	Os11g0599100, partial [Oryza sativa Japonica Group]
Os04g0531600	0.0304813	1.87352	up	Molecular Function: protein kinase activity (GO:0004672);; Biological Process: cellular protein modification process (GO:0006464);; Biological Process: phosphate-containing compound metabolic process (GO:0006796);; Cellular Component: intrinsic component of membrane (GO:0031224);; Molecular Function: purine ribonucleoside binding (GO:0032550);;	--	L-type lectin-domain containing receptor kinase IV.1 [Oryza sativa Japonica Group]
Os02g0763501	0.0191364	-2.57341	down	Biological Process: cellular protein modification process (GO:0006464);; Biological Process: phosphate-containing compound metabolic process (GO:0006796);; Molecular Function: kinase activity (GO:0016301);; Molecular Function: purine ribonucleoside binding (GO:0032550);; Biological Process: response to stimulus (GO:0050896);;	--	Os02g0763501 [Oryza sativa Japonica Group]
Os03g0100300	0.00567533	-1.538	down	Biological Process: response to stress (GO:0006950);; Molecular Function: cis-trans isomerase activity (GO:0016859);; Biological Process: peptidyl-proline modification (GO:0018208);; Cellular Component: intrinsic component of membrane (GO:0031224);;	--	uncharacterized protein LOC4331278 [Oryza sativa Japonica Group]
Os01g0952100	0.029319	-4.7326	down	--	--	germin-like protein 1-4 [Oryza sativa Japonica Group]
Os09g0518400	0.0191364	-2.57341	down	--	--	Os09g0518400 [Oryza sativa Japonica Group]
Os06g0218500	0.000756358	2.38544	up	Biological Process: reproduction (GO:0000003);; Molecular Function: nucleic acid binding (GO:0003676);; Biological Process: DNA metabolic process (GO:0006259);; Molecular Function: nucleoside-triphosphatase activity (GO:0017111);; Molecular Function: purine ribonucleoside binding (GO:0032550);; Biological Process: cellular response to stress (GO:0033554);; Molecular Function: cation binding (GO:0…	K10738|0|osa:4340503|probable DNA helicase MCM9 isoform X1	probable DNA helicase MCM9 isoform X3 [Oryza sativa Japonica Group]
Os04g0611050	0.029319	-4.7326	down	--	--	Os04g0611050, partial [Oryza sativa Japonica Group]
Os10g0498100	0.0330586	-1.14032	down	--	--	bifunctional epoxide hydrolase 2 [Oryza sativa Japonica Group]
Os02g0671950	0.0264601	1.02974	up	--	--	hypothetical protein OsI_08427 [Oryza sativa Indica Group]
Os02g0216300	0.0446808	-1.61499	down	Cellular Component: intrinsic component of membrane (GO:0031224);;	--	Os02g0216300, partial [Oryza sativa Japonica Group]
Os06g0286500	0.0118521	-1.93749	down	Molecular Function: purine ribonucleoside binding (GO:0032550);;	--	putative disease resistance RPP13-like protein 3 [Oryza sativa Japonica Group]
Os04g0475300	0.0446808	-1.61499	down	--	--	uncharacterized protein LOC4336148 [Oryza sativa Japonica Group]
Os11g0539000	0.0327062	-2.43442	down	--	--	Os11g0539000, partial [Oryza sativa Japonica Group]
Os01g0734800	0.0304813	1.87352	up	--	--	anthocyanidin 5,3-O-glucosyltransferase [Oryza sativa Japonica Group]
Os02g0230625	0.00408516	-2.02382	down	--	--	hypothetical protein [Oryza sativa Japonica Group]
Os05g0161700	0.0304813	1.87352	up	--	K00951|0|osa:9270381|probable GTP diphosphokinase CRSH3, chloroplastic	probable GTP diphosphokinase CRSH3, chloroplastic [Oryza sativa Japonica Group]
Os03g0789466	0.0264601	1.02974	up	Molecular Function: RNA binding (GO:0003723);; Biological Process: meiotic cell cycle (GO:0007126);; Biological Process: embryo sac development (GO:0009553);; Biological Process: pollen development (GO:0009555);; Biological Process: gene silencing (GO:0016458);; Cellular Component: nucleolar chromatin (GO:0030874);; Biological Process: histone lysine demethylation (GO:0070076);;	K11593|0|osa:4334449|protein argonaute MEL1	hypothetical protein OsI_13926 [Oryza sativa Indica Group]
Os02g0729300	0.000756358	2.38544	up	Cellular Component: membrane (GO:0016020);; Cellular Component: intracellular membrane-bounded organelle (GO:0043231);; Molecular Function: transition metal ion binding (GO:0046914);; Molecular Function: organic cyclic compound binding (GO:0097159);;	--	hypothetical protein OsI_08793 [Oryza sativa Indica Group]
Os01g0973550	0.0468699	1.16406	up	Molecular Function: protein kinase activity (GO:0004672);; Biological Process: cellular protein modification process (GO:0006464);; Molecular Function: purine ribonucleoside binding (GO:0032550);;	--	Protein kinase APK1A chloroplastic [Zea mays]
Os05g0158700	0.0327501	-1.30477	down	Molecular Function: catalytic activity (GO:0003824);; Biological Process: diterpenoid metabolic process (GO:0016101);; Molecular Function: transition metal ion binding (GO:0046914);;	K04125|5.50842e-86|osa:4337874|gibberellin 2-beta-dioxygenase 2	gibberellin oxidase, partial [Oryza sativa Japonica Group]
Os05g0193900	0.00173739	-2.23078	down	--	--	Os05g0193900 [Oryza sativa Japonica Group]
Os10g0537800	0.000756358	2.38544	up	--	--	aspartic proteinase nepenthesin-1 [Oryza sativa Japonica Group]
Os10g0151100	0.00173739	-2.23078	down	--	--	Os10g0151100 [Oryza sativa Japonica Group]
Os05g0490600	0.0264601	1.02974	up	Molecular Function: nucleic acid binding (GO:0003676);;	K09422|0|osa:4339167|transcription factor GAMYB	Os05g0490600 [Oryza sativa Japonica Group]
Os09g0551251	0.00408516	-2.02382	down	--	--	Os09g0551251 [Oryza sativa Japonica Group]
Os04g0290000	0.0304813	1.87352	up	Cellular Component: intrinsic component of membrane (GO:0031224);;	--	hypothetical protein OsI_05913 [Oryza sativa Indica Group]
Os12g0467300	0.0357617	1.315	up	Molecular Function: purine ribonucleoside binding (GO:0032550);;	--	hypothetical protein OsJ_36046 [Oryza sativa Japonica Group]
Os12g0552800	0.0319595	2.45777	up	Cellular Component: intrinsic component of membrane (GO:0031224);;	--	hypothetical protein OsJ_36446 [Oryza sativa Japonica Group]
Os05g0557700	0.0446808	-1.61499	down	--	K10581|0|osa:4339579|probable ubiquitin-conjugating enzyme E2 24 isoform X1	unknown protein [Oryza sativa Japonica Group]
Os07g0214300	0.00408516	-2.02382	down	Molecular Function: endopeptidase inhibitor activity (GO:0004866);; Biological Process: response to stress (GO:0006950);; Biological Process: negative regulation of peptidase activity (GO:0010466);; Cellular Component: intracellular membrane-bounded organelle (GO:0043231);; Cellular Component: extracellular region part (GO:0044421);;	--	seed allergenic protein RAG2 [Oryza sativa Japonica Group]
Os04g0455600	0.0164037	-1.90398	down	--	--	uncharacterized protein LOC4336021 isoform X2 [Oryza sativa Japonica Group]
Os03g0278000	0.00695975	-1.89191	down	--	K08678|0|osa:4332424|UDP-glucuronic acid decarboxylase 6	hypothetical protein OsI_10996 [Oryza sativa Indica Group]
Os01g0180800	0.00173739	-2.23078	down	--	K09489|0|osa:4325355|heat shock 70 kDa protein 15	heat shock 70 kDa protein 15 [Oryza sativa Japonica Group]
Os01g0576050	0.0468699	1.16406	up	--	--	hypothetical protein OsJ_02319 [Oryza sativa Japonica Group]
Os04g0116600	0.029319	-4.7326	down	Cellular Component: intrinsic component of membrane (GO:0031224);;	K10251|7.35107e-180|osa:4334949|very-long-chain 3-oxoacyl-CoA reductase 1	very-long-chain 3-oxoacyl-CoA reductase 1 [Oryza sativa Japonica Group]
Os01g0684301	0.00837882	-1.66824	down	--	--	Os01g0684301, partial [Oryza sativa Japonica Group]
Os12g0639800	0.029319	-4.7326	down	Biological Process: vesicle-mediated transport (GO:0016192);; Cellular Component: intrinsic component of membrane (GO:0031224);;	K08515|5.03949e-135|osa:4352920|vesicle-associated membrane protein 721	vesicle-associated membrane protein 721 [Oryza sativa Japonica Group]
Os12g0562500	0.00837882	-1.66824	down	Biological Process: transcription, DNA-templated (GO:0006351);; Biological Process: cellular protein modification process (GO:0006464);; Biological Process: phosphate-containing compound metabolic process (GO:0006796);; Molecular Function: kinase activity (GO:0016301);; Molecular Function: purine ribonucleoside binding (GO:0032550);;	--	Os12g0562500, partial [Oryza sativa Japonica Group]
Os02g0284300	0.0191364	-2.57341	down	Biological Process: cellular protein modification process (GO:0006464);; Biological Process: phosphate-containing compound metabolic process (GO:0006796);; Molecular Function: kinase activity (GO:0016301);; Cellular Component: intrinsic component of membrane (GO:0031224);; Molecular Function: purine ribonucleoside binding (GO:0032550);; Cellular Component: intracellular membrane-bounded organelle…	--	Os02g0284300, partial [Oryza sativa Japonica Group]
Os11g0189600	0.000756358	2.38544	up	Molecular Function: isomerase activity (GO:0016853);; Cellular Component: intrinsic component of membrane (GO:0031224);;	K19010|0|osa:9268610|parkeol synthase isoform X1	parkeol synthase isoform X1 [Oryza sativa Japonica Group]
Os09g0572450	0.0327062	-2.43442	down	--	K06185|0|osa:4347924|ABC transporter F family member 1	ABC transporter F family member 1 [Oryza sativa Japonica Group]
Os01g0113400	0.00408516	-2.02382	down	Molecular Function: pattern binding (GO:0001871);; Molecular Function: protein kinase activity (GO:0004672);; Biological Process: cellular protein modification process (GO:0006464);; Biological Process: phosphate-containing compound metabolic process (GO:0006796);; Cellular Component: intrinsic component of membrane (GO:0031224);; Molecular Function: purine ribonucleoside binding (GO:0032550);;	--	Os01g0113400, partial [Oryza sativa Japonica Group]
Os04g0623700	0.0468699	1.16406	up	--	K03104|1.43718e-60|osa:4337050|signal recognition particle 14 kDa protein isoform X1	hypothetical protein EE612_025644 [Oryza sativa]
Os09g0564200	0.0327501	-1.30477	down	--	--	Os09g0564200 [Oryza sativa Japonica Group]
Os01g0100400	0.00408516	-2.02382	down	--	--	monocopper oxidase-like protein SKU5 isoform X1 [Oryza sativa Japonica Group]
Os12g0126300	0.00408516	-2.02382	down	Molecular Function: nucleic acid binding transcription factor activity (GO:0001071);; Molecular Function: nucleic acid binding (GO:0003676);; Biological Process: transcription, DNA-templated (GO:0006351);; Cellular Component: intracellular membrane-bounded organelle (GO:0043231);; Biological Process: single-multicellular organism process (GO:0044707);;	K09285|0|osa:4351386|AP2-like ethylene-responsive transcription factor At1g79700 isoform X1	AP2-like ethylene-responsive transcription factor At1g79700 isoform X1 [Oryza sativa Japonica Group]
Os01g0728000	0.000756358	2.38544	up	--	--	Os01g0728000, partial [Oryza sativa Japonica Group]
Os07g0476200	0.0468699	1.16406	up	--	K15176|0|osa:4343217|protein CTR9 homolog	Os07g0476200, partial [Oryza sativa Japonica Group]
Os04g0555000	0.0319595	2.45777	up	--	--	scarecrow-like protein 27 [Oryza sativa Japonica Group]
Os06g0216966	0.0174232	1.36286	up	Cellular Component: intrinsic component of membrane (GO:0031224);;	--	Os06g0216966 [Oryza sativa Japonica Group]
Os03g0331700	0.0264601	1.02974	up	Molecular Function: metal ion binding (GO:0046872);;	K13448|1.46171e-101|osa:4332731|probable calcium-binding protein CML27	probable calcium-binding protein CML27 [Oryza sativa Japonica Group]
Os12g0154000	0.0446808	-1.61499	down	Cellular Component: intrinsic component of membrane (GO:0031224);;	--	Os12g0154000 [Oryza sativa Japonica Group]
Os06g0532301	0.029319	-4.7326	down	--	--	Os06g0532301 [Oryza sativa Japonica Group]
Os01g0686600	0.00173739	-2.23078	down	--	--	Os01g0686600 [Oryza sativa Japonica Group]
Os06g0712700	0.0327062	-2.43442	down	--	K09264|1.00924e-149|osa:4342047|MADS-box transcription factor 16	MADS-box transcription factor 16 [Oryza sativa Japonica Group]
Os01g0378100	0.0468699	1.16406	up	--	--	Os01g0378100, partial [Oryza sativa Japonica Group]
Os06g0163300	0.000756358	2.38544	up	Cellular Component: intrinsic component of membrane (GO:0031224);;	--	uncharacterized protein LOC4340222 [Oryza sativa Japonica Group]
Os07g0179400	0.00173739	-2.23078	down	--	K02201|3.76551e-113|osa:4342557|phosphopantetheine adenylyltransferase 1 isoform X2	phosphopantetheine adenylyltransferase 1 isoform X2 [Oryza sativa Japonica Group]
Os06g0176300	0.029319	-4.7326	down	--	--	Os06g0176300 [Oryza sativa Japonica Group]
Os08g0137300	0.029319	-4.7326	down	Molecular Function: catalytic activity (GO:0003824);; Cellular Component: intrinsic component of membrane (GO:0031224);; Cellular Component: intracellular membrane-bounded organelle (GO:0043231);;	--	uncharacterized protein LOC4344622 [Oryza sativa Japonica Group]
Os01g0668700	0.000756358	2.38544	up	--	--	putative receptor protein kinase ZmPK1 [Oryza sativa Japonica Group]
Os08g0512801	0.0264601	1.02974	up	--	--	Os08g0512700 [Oryza sativa Japonica Group]
Os02g0319300	0.029319	-4.7326	down	--	--	Os02g0319300, partial [Oryza sativa Japonica Group]
Os05g0566700	0.0264601	1.02974	up	Biological Process: translational initiation (GO:0006413);; Molecular Function: translation factor activity, RNA binding (GO:0008135);; Cellular Component: intrinsic component of membrane (GO:0031224);; Cellular Component: intracellular membrane-bounded organelle (GO:0043231);; Cellular Component: protein complex (GO:0043234);; Cellular Component: translation preinitiation complex (GO:0070993);;	--	unknown protein [Oryza sativa Japonica Group]
Os12g0126050	0.00058162	2.35229	up	Molecular Function: secondary active transmembrane transporter activity (GO:0015291);; Biological Process: drug transport (GO:0015893);; Cellular Component: intrinsic component of membrane (GO:0031224);;	K03327|2.87627e-172|osa:4351384|protein DETOXIFICATION 21	hypothetical protein OsI_37326 [Oryza sativa Indica Group]
Os01g0163450	0.029319	-4.7326	down	Cellular Component: intrinsic component of membrane (GO:0031224);; Cellular Component: intracellular membrane-bounded organelle (GO:0043231);;	--	uncharacterized protein LOC107277403 [Oryza sativa Japonica Group]
Os05g0194500	0.00408516	-2.02382	down	Molecular Function: nucleic acid binding (GO:0003676);; Biological Process: transcription, DNA-templated (GO:0006351);; Cellular Component: intracellular membrane-bounded organelle (GO:0043231);;	--	hypothetical protein OsI_18770 [Oryza sativa Indica Group]
Os10g0139500	0.0357617	1.315	up	--	--	hypothetical protein OsI_32708 [Oryza sativa Indica Group]
Os08g0440200	0.029319	-4.7326	down	Cellular Component: intracellular membrane-bounded organelle (GO:0043231);; Molecular Function: organic cyclic compound binding (GO:0097159);;	K01148|0|osa:4345682|poly(A)-specific ribonuclease PARN-like	poly(A)-specific ribonuclease PARN-like [Oryza sativa Japonica Group]
Os08g0484100	0.0446808	-1.61499	down	Molecular Function: actin binding (GO:0003779);; Molecular Function: hydrolase activity, acting on glycosyl bonds (GO:0016798);; Biological Process: actin cytoskeleton organization (GO:0030036);; Biological Process: primary metabolic process (GO:0044238);;	--	hypothetical protein OsI_29647 [Oryza sativa Indica Group]
Os05g0172000	0.029319	-4.7326	down	--	--	uncharacterized protein LOC4337946 [Oryza sativa Japonica Group]
Os04g0415000	0.0446808	-1.61499	down	--	--	uncharacterized protein LOC4335802 [Oryza sativa Japonica Group]
Os07g0442800	0.0327062	-2.43442	down	Cellular Component: membrane (GO:0016020);; Cellular Component: intracellular membrane-bounded organelle (GO:0043231);;	--	uncharacterized protein LOC4334942 [Oryza sativa Japonica Group]
Os10g0333000	0.0304813	1.87352	up	Cellular Component: intrinsic component of membrane (GO:0031224);;	--	Os10g0333000 [Oryza sativa Japonica Group]
Os02g0743450	0.00408516	-2.02382	down	Biological Process: transport (GO:0006810);; Biological Process: auxin-activated signaling pathway (GO:0009734);; Cellular Component: intrinsic component of membrane (GO:0031224);; Biological Process: root development (GO:0048364);; Biological Process: regulation of biological quality (GO:0065008);; Cellular Component: plasma membrane protein complex (GO:0098797);;	K13947|0|osa:4330700|auxin efflux carrier component 1	auxin efflux carrier component 1a [Oryza sativa Japonica Group]
Os11g0258700	0.0357617	1.315	up	Molecular Function: nucleic acid binding (GO:0003676);; Molecular Function: protein binding (GO:0005515);; Cellular Component: intracellular membrane-bounded organelle (GO:0043231);; Biological Process: organic substance metabolic process (GO:0071704);;	--	Os11g0258700 [Oryza sativa Japonica Group]
Os02g0608801	0.00408516	-2.02382	down	Molecular Function: hydrolase activity (GO:0016787);;	--	acetylajmalan esterase [Oryza sativa Japonica Group]
Os01g0737900	0.00173739	-2.23078	down	Cellular Component: intracellular membrane-bounded organelle (GO:0043231);; Molecular Function: transition metal ion binding (GO:0046914);;	--	pentatricopeptide repeat-containing protein At4g32450, mitochondrial isoform X1 [Oryza sativa Japonica Group]
Os09g0442400	0.00408516	-2.02382	down	Molecular Function: protein binding (GO:0005515);; Biological Process: purine ribonucleotide metabolic process (GO:0009150);; Cellular Component: intrinsic component of membrane (GO:0031224);; Biological Process: gametophyte development (GO:0048229);;	--	protein GAMETE EXPRESSED 1 [Oryza sativa Japonica Group]
Os06g0352200	0.029319	-4.7326	down	Cellular Component: intrinsic component of membrane (GO:0031224);; Cellular Component: intracellular membrane-bounded organelle (GO:0043231);;	--	protein DMP4 [Oryza sativa Japonica Group]
Os11g0171601	0.0304813	1.87352	up	--	K13412|2.07459e-134|osa:4349899|calcium-dependent protein kinase SK5	calcium-dependent protein kinase 24 [Oryza sativa Japonica Group]
Os06g0303800	0.029319	-4.7326	down	Cellular Component: intrinsic component of membrane (GO:0031224);;	--	Os06g0303800, partial [Oryza sativa Japonica Group]
Os02g0599151	0.029319	-4.7326	down	Molecular Function: phosphoprotein phosphatase activity (GO:0004721);; Biological Process: cellular protein modification process (GO:0006464);; Cellular Component: intrinsic component of membrane (GO:0031224);; Molecular Function: cation binding (GO:0043169);;	--	Os02g0599151, partial [Oryza sativa Japonica Group]
Os04g0354400	0.00173739	-2.23078	down	--	--	Os04g0354400, partial [Oryza sativa Japonica Group]
Os08g0468400	0.0446808	-1.61499	down	--	--	putative Hec1 protein [Oryza sativa Japonica Group]
Os02g0757700	0.00408516	-2.02382	down	Biological Process: response to acid chemical (GO:0001101);; Molecular Function: catalytic activity (GO:0003824);; Biological Process: regulation of gene expression (GO:0010468);;	--	F-box protein FBW2 [Oryza sativa Japonica Group]
Os02g0141201	0.0174232	1.36286	up	--	--	Os01g0196800 [Oryza sativa Japonica Group]
Os08g0491200	0.0327501	-1.30477	down	--	K08286|0|osa:4345907|serine/threonine-protein kinase D6PK	hypothetical protein OsJ_27758 [Oryza sativa Japonica Group]
Os01g0827300	0.0468699	1.16406	up	--	K05909|0|osa:4327522|laccase-3	laccase-3 [Oryza sativa Japonica Group]
Os03g0709300	0.0468699	1.16406	up	--	--	chemocyanin [Oryza sativa Japonica Group]
Os04g0307300	0.00173739	-2.23078	down	Biological Process: transcription, DNA-templated (GO:0006351);; Molecular Function: purine ribonucleoside binding (GO:0032550);; Cellular Component: intracellular membrane-bounded organelle (GO:0043231);;	--	Os04g0307300, partial [Oryza sativa Japonica Group]
Os12g0102800	0.0357617	1.315	up	Biological Process: cellular protein modification process (GO:0006464);; Molecular Function: kinase activity (GO:0016301);; Molecular Function: purine ribonucleoside binding (GO:0032550);;	--	hypothetical protein EE612_057269 [Oryza sativa]
Os03g0760700	0.0357617	1.315	up	Biological Process: sulfur amino acid biosynthetic process (GO:0000097);; Molecular Function: nucleotide binding (GO:0000166);; Molecular Function: protein binding (GO:0005515);; Biological Process: isoleucine metabolic process (GO:0006549);; Biological Process: threonine metabolic process (GO:0006566);; Biological Process: lysine biosynthetic process (GO:0009085);; Molecular Function: oxidoreduc…	K00133|0|osa:4334188|aspartate-semialdehyde dehydrogenase	uncharacterized protein LOC4334188 [Oryza sativa Japonica Group]
Os07g0466300	0.029319	-4.7326	down	--	--	Os07g0466300, partial [Oryza sativa Japonica Group]
Os12g0169950	0.0304813	1.87352	up	Molecular Function: protein serine/threonine kinase activity (GO:0004674);; Biological Process: protein phosphorylation (GO:0006468);; Biological Process: signal transduction (GO:0007165);; Molecular Function: purine ribonucleoside binding (GO:0032550);; Cellular Component: intracellular part (GO:0044424);; Molecular Function: metal ion binding (GO:0046872);;	K13412|1.89274e-143|osa:4351620|calcium-dependent protein kinase 11	calcium-dependent protein kinase 28 [Oryza sativa Japonica Group]
Os12g0270300	0.0319595	2.45777	up	Molecular Function: purine ribonucleoside binding (GO:0032550);;	--	disease resistance protein RGA5-like [Oryza sativa Japonica Group]
Os10g0404900	0.00408516	-2.02382	down	--	K09338|3.78752e-108|osa:4348578|homeobox-leucine zipper protein HOX23	hypothetical protein OsJ_31457 [Oryza sativa Japonica Group]
Os08g0527800	0.029319	-4.7326	down	--	K11844|0|osa:4346106|ubiquitin carboxyl-terminal hydrolase 2	ubiquitin-specific protease-like [Oryza sativa Japonica Group]
Os03g0363900	0.00695975	-1.89191	down	Molecular Function: palmitoyltransferase activity (GO:0016409);; Cellular Component: intrinsic component of membrane (GO:0031224);; Molecular Function: transition metal ion binding (GO:0046914);;	K20003|0|osa:4332904|probable protein S-acyltransferase 17	probable protein S-acyltransferase 17 [Oryza sativa Japonica Group]
Os07g0191500	0.00837882	-1.66824	down	Molecular Function: nuclease activity (GO:0004518);; Biological Process: RNA modification (GO:0009451);; Cellular Component: plastid (GO:0009536);; Molecular Function: transition metal ion binding (GO:0046914);;	--	pentatricopeptide repeat-containing protein At1g59720, chloroplastic/mitochondrial [Oryza sativa Japonica Group]
Os02g0612700	0.029319	-4.7326	down	Cellular Component: intracellular membrane-bounded organelle (GO:0043231);; Biological Process: protein oligomerization (GO:0051259);;	--	BTB/POZ domain-containing protein At4g30940 [Oryza sativa Japonica Group]
Os03g0842900	0.00408516	-2.02382	down	Molecular Function: catalytic activity (GO:0003824);; Biological Process: single-organism metabolic process (GO:0044710);;	K22418|0|osa:4334744|11-beta-hydroxysteroid dehydrogenase-like 5	11-beta-hydroxysteroid dehydrogenase-like 5 [Oryza sativa Japonica Group]
Os05g0417100	0.0319595	2.45777	up	Molecular Function: endopeptidase activity (GO:0004175);; Biological Process: protein metabolic process (GO:0019538);; Cellular Component: intracellular membrane-bounded organelle (GO:0043231);;	--	protease Do-like 10, mitochondrial isoform X1 [Oryza sativa Japonica Group]
Os06g0663100	0.00058162	2.35229	up	Molecular Function: nucleic acid binding (GO:0003676);; Biological Process: tRNA metabolic process (GO:0006399);; Biological Process: RNA modification (GO:0009451);; Molecular Function: intramolecular transferase activity (GO:0016866);;	--	hypothetical protein OsI_24011 [Oryza sativa Indica Group]
Os03g0599400	0.00408516	-2.02382	down	--	--	Os03g0599400, partial [Oryza sativa Japonica Group]
Os07g0123700	0.00695975	-1.89191	down	--	--	Os07g0123700 [Oryza sativa Japonica Group]
Os01g0126100	0.0468699	1.16406	up	Molecular Function: oxidoreductase activity (GO:0016491);; Cellular Component: virion part (GO:0044423);; Biological Process: single-organism metabolic process (GO:0044710);; Molecular Function: transition metal ion binding (GO:0046914);;	--	multicopper oxidase LPR1 homolog 1 [Oryza sativa Japonica Group]
Os03g0658800	0.0319595	2.45777	up	--	--	cytochrome P450 87A3-like isoform X2 [Oryza sativa Japonica Group]
Os02g0595300	0.0118521	-1.93749	down	--	--	hypothetical protein [Oryza sativa Japonica Group]
Os04g0373000	0.00173739	-2.23078	down	Cellular Component: intrinsic component of membrane (GO:0031224);; Molecular Function: metal ion transmembrane transporter activity (GO:0046873);; Biological Process: transmembrane transport (GO:0055085);; Biological Process: divalent metal ion transport (GO:0070838);;	--	Os04g0373000, partial [Oryza sativa Japonica Group]
Os11g0199000	0.00367195	2.32894	up,down	--	--	hypothetical protein OsJ_33279 [Oryza sativa Japonica Group]
Os02g0614966	0.0446808	-1.61499	down	--	--	Os02g0614966 [Oryza sativa Japonica Group]
Os07g0537200	0.029319	-4.7326	down	Molecular Function: protein kinase activity (GO:0004672);; Biological Process: cellular protein modification process (GO:0006464);; Biological Process: phosphate-containing compound metabolic process (GO:0006796);; Molecular Function: purine ribonucleoside binding (GO:0032550);;	--	Os07g0537200, partial [Oryza sativa Japonica Group]
Os03g0726500	0.000756358	2.38544	up	Cellular Component: intrinsic component of membrane (GO:0031224);; Cellular Component: intracellular membrane-bounded organelle (GO:0043231);;	--	sulfite exporter TauE/SafE family protein 4 [Oryza sativa Japonica Group]
Os05g0121400	0.00837882	-1.66824	down	Molecular Function: rDNA binding (GO:0000182);; Molecular Function: nucleic acid binding transcription factor activity (GO:0001071);; Biological Process: transcription, DNA-templated (GO:0006351);; Molecular Function: rRNA binding (GO:0019843);; Cellular Component: nuclear lumen (GO:0031981);; Molecular Function: cation binding (GO:0043169);;	K09191|0|osa:4337652|transcription factor IIIA isoform X1	Os05g0121400, partial [Oryza sativa Japonica Group]
Os01g0593500	0.029319	-4.7326	down	Molecular Function: structural molecule activity (GO:0005198);; Biological Process: gene expression (GO:0010467);; Molecular Function: rRNA binding (GO:0019843);; Cellular Component: intracellular ribonucleoprotein complex (GO:0030529);; Cellular Component: intracellular membrane-bounded organelle (GO:0043231);;	K02897|7.19033e-170|osa:4326383|50S ribosomal protein L25	uncharacterized protein LOC4326383 [Oryza sativa Japonica Group]
Os01g0916400	0.00058162	2.35229	up	Molecular Function: binding (GO:0005488);;	K17285|0|osa:4324333|selenium-binding protein 1	selenium-binding protein 1 [Oryza sativa Japonica Group]
Os01g0835700	0.00173739	-2.23078	down	--	--	zinc finger protein CONSTANS-LIKE 9 [Oryza sativa Japonica Group]
Os09g0473502	0.00408516	-2.02382	down	Biological Process: response to stress (GO:0006950);;	--	unknown protein [Oryza sativa Japonica Group]
Os07g0520600	0.00408516	-2.02382	down	--	--	Os07g0520600, partial [Oryza sativa Japonica Group]
Os02g0291500	0.0446808	-1.61499	down	--	--	Os02g0291500, partial [Oryza sativa Japonica Group]
Os01g0909200	0.00567533	-1.538	down	Molecular Function: nucleic acid binding (GO:0003676);; Molecular Function: endoribonuclease activity, producing 5'-phosphomonoesters (GO:0016891);; Molecular Function: nucleoside-triphosphatase activity (GO:0017111);; Biological Process: gene silencing by RNA (GO:0031047);; Molecular Function: purine ribonucleoside binding (GO:0032550);; Molecular Function: cation binding (GO:0043169);; Cellular…	K11592|0|osa:4324864|endoribonuclease Dicer homolog 3a isoform X1	endoribonuclease Dicer homolog 3a [Oryza sativa Japonica Group]
Os06g0717200	0.00408516	-2.02382	down	Molecular Function: protein kinase activity (GO:0004672);; Molecular Function: receptor binding (GO:0005102);; Cellular Component: vacuole (GO:0005773);; Cellular Component: cell-cell junction (GO:0005911);; Biological Process: cellular protein modification process (GO:0006464);; Biological Process: phosphate-containing compound metabolic process (GO:0006796);; Biological Process: regulation of f…	--	leucine-rich repeat receptor-like kinase protein FLORAL ORGAN NUMBER1 [Oryza sativa Japonica Group]
Os01g0562400	0.00408516	-2.02382	down	Molecular Function: cis-trans isomerase activity (GO:0016859);; Biological Process: peptidyl-proline modification (GO:0018208);; Cellular Component: intrinsic component of membrane (GO:0031224);;	--	Os01g0562400, partial [Oryza sativa Japonica Group]
Os05g0295300	0.00173739	-2.23078	down	Cellular Component: cytoplasm (GO:0005737);; Biological Process: fatty acid metabolic process (GO:0006631);; Molecular Function: CoA carboxylase activity (GO:0016421);; Molecular Function: ligase activity, forming carbon-nitrogen bonds (GO:0016879);; Molecular Function: purine ribonucleoside binding (GO:0032550);; Molecular Function: cation binding (GO:0043169);; Cellular Component: intracellular…	--	Os05g0295300, partial [Oryza sativa Japonica Group]
Os02g0150200	0.0468699	1.16406	up	Molecular Function: protein binding (GO:0005515);;	--	hypothetical protein OsI_05865 [Oryza sativa Indica Group]
Os05g0186900	0.00408516	-2.02382	down	Biological Process: transcription, DNA-templated (GO:0006351);; Biological Process: hormone-mediated signaling pathway (GO:0009755);; Cellular Component: intrinsic component of membrane (GO:0031224);; Cellular Component: intracellular membrane-bounded organelle (GO:0043231);;	K14484|8.19837e-49|osa:9272441|auxin-responsive protein IAA16 isoform X1	auxin-responsive protein IAA16 isoform X1 [Oryza sativa Japonica Group]
Os01g0321800	0.0327501	-1.30477	down	--	--	uncharacterized protein LOC4326989 [Oryza sativa Japonica Group]
Os04g0402500	0.00408516	-2.02382	down	Molecular Function: transition metal ion binding (GO:0046914);;	K19042|2.34376e-131|osa:4335734|probable BOI-related E3 ubiquitin-protein ligase 3	probable BOI-related E3 ubiquitin-protein ligase 3 [Oryza sativa Japonica Group]
Os07g0227750	0.0264601	1.02974	up	Biological Process: phosphate-containing compound metabolic process (GO:0006796);; Cellular Component: chloroplast stroma (GO:0009570);; Molecular Function: transferase activity, transferring phosphorus-containing groups (GO:0016772);;	K08869|0|osa:4342761|uncharacterized aarF domain-containing protein kinase At5g05200, chloroplastic	ABC1 family protein kinase-like protein [Oryza sativa Japonica Group]
Os06g0145400	0.0304813	1.87352	up	Molecular Function: transferase activity, transferring acyl groups (GO:0016746);;	--	Os06g0145400 [Oryza sativa Japonica Group]
Os02g0568200	0.0468699	1.16406	up	Biological Process: response to radiation (GO:0009314);; Biological Process: tropism (GO:0009606);; Cellular Component: membrane (GO:0016020);; Biological Process: protein modification by small protein conjugation (GO:0032446);;	--	coleoptile phototropism protein 1 [Oryza sativa Japonica Group]
Os06g0116100	0.0327062	-2.43442	down	Molecular Function: protein kinase activity (GO:0004672);; Biological Process: cellular protein modification process (GO:0006464);; Molecular Function: purine ribonucleoside binding (GO:0032550);;	K08829|0|osa:4339927|cyclin-dependent kinase F-4-like	cyclin-dependent kinase F-4-like [Oryza sativa Japonica Group]
Os04g0221450	0.0248093	-1.97024	down	Molecular Function: organic cyclic compound binding (GO:0097159);;	--	OSJNBb0045P24.1 [Oryza sativa Japonica Group]
Os04g0402100	0.00408516	-2.02382	down	Molecular Function: protein binding (GO:0005515);; Biological Process: cellular process (GO:0009987);; Cellular Component: intrinsic component of membrane (GO:0031224);; Cellular Component: intracellular membrane-bounded organelle (GO:0043231);; Molecular Function: metal ion binding (GO:0046872);;	K08054|0|osa:4335732|calnexin homolog	calnexin homolog [Oryza sativa Japonica Group]
Os03g0801300	0.00408516	-2.02382	down	Cellular Component: intrinsic component of membrane (GO:0031224);;	--	hypothetical protein [Oryza sativa Japonica Group]
Os09g0333600	0.0330586	-1.14032	down	--	--	hypothetical protein OsJ_28935 [Oryza sativa Japonica Group]
Os03g0577800	0.029319	-4.7326	down	Cellular Component: membrane (GO:0016020);;	--	hypothetical protein [Oryza sativa Japonica Group]
Os02g0535700	0.00173739	-2.23078	down	--	--	Os02g0535700 [Oryza sativa Japonica Group]
Os03g0339900	0.00367195	2.32894	up	--	K07198|0|osa:4332786|CBL-interacting protein kinase 10 isoform X1	CBL-interacting protein kinase 10 isoform X1 [Oryza sativa Japonica Group]
Os01g0705000	0.0468699	1.16406	up	--	--	Os01g0705000 [Oryza sativa Japonica Group]
Os08g0175300	0.0468699	1.16406	up	--	K02335|0|osa:4344789|DNA polymerase I A, chloroplastic	DNA polymerase I A, chloroplastic [Oryza sativa Japonica Group]
Os03g0794000	0.0164037	-1.90398	down	Molecular Function: binding (GO:0005488);; Biological Process: lipid localization (GO:0010876);; Molecular Function: hydrolase activity (GO:0016787);; Biological Process: protein metabolic process (GO:0019538);;	--	non-specific lipid transfer protein GPI-anchored 2 isoform X1 [Oryza sativa Japonica Group]
Os05g0397300	0.0248093	-1.97024	down	--	--	Os05g0397300 [Oryza sativa Japonica Group]
Os07g0601900	0.029319	-4.7326	down	Molecular Function: cofactor binding (GO:0048037);;	--	Os07g0601900 [Oryza sativa Japonica Group]
Os06g0724600	0.00408516	-2.02382	down	Molecular Function: nucleic acid binding (GO:0003676);; Cellular Component: viral capsid (GO:0019028);; Molecular Function: small molecule binding (GO:0036094);; Cellular Component: intracellular membrane-bounded organelle (GO:0043231);;	--	RNA-binding (RRM/RBD/RNP motifs) family protein [Zea mays]
Os02g0176100	0.0330586	-1.14032	down	Biological Process: cellular protein modification process (GO:0006464);; Biological Process: phosphate-containing compound metabolic process (GO:0006796);; Molecular Function: kinase activity (GO:0016301);; Cellular Component: intrinsic component of membrane (GO:0031224);; Molecular Function: purine ribonucleoside binding (GO:0032550);; Cellular Component: intracellular membrane-bounded organelle…	--	Os02g0176100, partial [Oryza sativa Japonica Group]
Os01g0134500	0.00408516	-2.02382	down	Molecular Function: catalytic activity (GO:0003824);; Biological Process: fatty acid metabolic process (GO:0006631);; Cellular Component: intrinsic component of membrane (GO:0031224);; Molecular Function: transition metal ion binding (GO:0046914);;	K00227|0|osa:4325687|delta(7)-sterol-C5(6)-desaturase	delta(7)-sterol-C5(6)-desaturase [Oryza sativa Japonica Group]
Os02g0325401	0.00695975	-1.89191	down	--	--	Os10g0344800, partial [Oryza sativa Japonica Group]
Os04g0163425	0.00058162	2.35229	up	--	--	Os04g0163425, partial [Oryza sativa Japonica Group]
Os02g0125000	0.00408516	-2.02382	down	Cellular Component: chloroplast (GO:0009507);; Biological Process: photosynthesis, light reaction (GO:0019684);; Cellular Component: intrinsic component of membrane (GO:0031224);; Cellular Component: photosynthetic membrane (GO:0034357);;	--	protein LOW PSII ACCUMULATION 2, chloroplastic [Oryza sativa Japonica Group]
Os10g0370400	0.0174232	1.36286	up	--	--	Os10g0370400 [Oryza sativa Japonica Group]
Os01g0393100	0.00408516	-2.02382	down	--	--	putative OsNAC2 [Oryza sativa Japonica Group]
Os02g0133200	0.00408516	-2.02382	down	Cellular Component: intracellular membrane-bounded organelle (GO:0043231);; Biological Process: establishment of localization (GO:0051234);;	--	phosphatidylinositol/phosphatidylcholine transfer protein SFH12 isoform X2 [Oryza sativa Japonica Group]
Os04g0649700	0.00567533	-1.538	down	Biological Process: cellular protein modification process (GO:0006464);; Molecular Function: kinase activity (GO:0016301);; Cellular Component: intrinsic component of membrane (GO:0031224);; Molecular Function: purine ribonucleoside binding (GO:0032550);;	--	Os04g0649700, partial [Oryza sativa Japonica Group]
Os08g0180300	0.0327501	-1.30477	down	--	--	hypothetical protein OsI_28047 [Oryza sativa Indica Group]
Os01g0842400	0.0357617	1.315	up	--	K05909|0|osa:4327500|laccase-4	hypothetical protein OsJ_04039 [Oryza sativa Japonica Group]
Os10g0558600	0.029319	-4.7326	down	--	--	putative PPR repeat protein [Oryza sativa Japonica Group]
Os03g0127500	0.00408516	-2.02382	down	Molecular Function: nucleic acid binding transcription factor activity (GO:0001071);; Molecular Function: DNA binding (GO:0003677);; Biological Process: transcription, DNA-templated (GO:0006351);; Cellular Component: intracellular membrane-bounded organelle (GO:0043231);;	--	transcription factor RF2b-like [Oryza sativa Japonica Group]
Os10g0485600	0.00685007	-2.19785	down	--	--	RecName: Full=Endoribonuclease Dicer homolog 3b; AltName: Full=Dicer-like protein 3b; Short=OsDCL3b
Os03g0729500	0.00173739	-2.23078	down	--	--	TPA_exp: growth-regulating factor 6 [Oryza sativa (japonica cultivar-group)]
Os05g0501800	0.0264601	1.02974	up	Cellular Component: intracellular membrane-bounded organelle (GO:0043231);;	--	Os05g0501800 [Oryza sativa Japonica Group]
Os10g0407400	0.029319	-4.7326	down	Molecular Function: organic cyclic compound binding (GO:0097159);;	--	protein NEN1 isoform X1 [Oryza sativa Japonica Group]
Os01g0850800	0.0357617	1.315	up	--	K05909|0|osa:4324803|laccase-8	laccase-8 [Oryza sativa Japonica Group]
Os08g0337601	0.0468699	1.16406	up	Molecular Function: transition metal ion binding (GO:0046914);; Molecular Function: organic cyclic compound binding (GO:0097159);;	--	Os06g0661000, partial [Oryza sativa Japonica Group]
Os12g0563500	0.0118521	-1.93749	down	Molecular Function: exopeptidase activity (GO:0008238);; Biological Process: protein metabolic process (GO:0019538);; Cellular Component: intracellular membrane-bounded organelle (GO:0043231);; Molecular Function: transition metal ion binding (GO:0046914);;	--	intermediate cleaving peptidase 55, mitochondrial isoform X2 [Oryza sativa Japonica Group]
Os10g0503250	0.00408516	-2.02382	down	Molecular Function: transferase activity, transferring acyl groups (GO:0016746);;	K19861|0|osa:4349050|benzyl alcohol O-benzoyltransferase	putative hypersensitivity-related (hsr)protein [Oryza sativa Japonica Group]
Os01g0768200	0.0468699	1.16406	up	--	--	hypothetical protein OsI_03885 [Oryza sativa Indica Group]
Os05g0293600	0.0446808	-1.61499	down	Cellular Component: intracellular membrane-bounded organelle (GO:0043231);;	--	retrotransposon protein, putative, Ty3-gypsy subclass [Oryza sativa Japonica Group]
Os05g0556350	0.000756358	2.38544	up	Biological Process: lipid biosynthetic process (GO:0008610);; Molecular Function: acylglycerol O-acyltransferase activity (GO:0016411);; Cellular Component: intracellular membrane-bounded organelle (GO:0043231);;	--	O-acyltransferase WSD1 [Oryza sativa Japonica Group]
Os04g0539701	0.029319	-4.7326	down	Molecular Function: cofactor binding (GO:0048037);;	--	Os04g0539701 [Oryza sativa Japonica Group]
Os04g0645100	0.0446808	-1.61499	down	--	K03255|0|osa:4337192|protein TSS isoform X1	protein TSS isoform X1 [Oryza sativa Japonica Group]
Os11g0146600	0.00408516	-2.02382	down	Molecular Function: catalytic activity (GO:0003824);; Cellular Component: intracellular membrane-bounded organelle (GO:0043231);; Biological Process: primary metabolic process (GO:0044238);;	--	Lipase family protein [Oryza sativa Japonica Group]
Os02g0590700	0.00695975	-1.89191	down	--	K08857|0|osa:4329828|serine/threonine-protein kinase Nek6	serine/threonine-protein kinase Nek6 [Oryza sativa Japonica Group]
Os02g0771700	0.00408516	-2.02382	down	--	--	glucan endo-1,3-beta-glucosidase 12 [Oryza sativa Japonica Group]
Os06g0172000	0.00837882	-1.66824	down	--	--	pentatricopeptide repeat-containing protein At5g48730, chloroplastic [Oryza sativa Japonica Group]
Os03g0121800	0.00567533	-1.538	down	--	K11592|0|osa:4331440|endoribonuclease Dicer homolog 1	hypothetical protein OsI_09779 [Oryza sativa Indica Group]
Os08g0276200	0.0164037	-1.90398	down	Molecular Function: nucleic acid binding transcription factor activity (GO:0001071);; Molecular Function: DNA binding (GO:0003677);; Biological Process: transcription, DNA-templated (GO:0006351);;	--	WRKY transcription factor 82 [Oryza sativa Japonica Group]
Os02g0194400	0.000756358	2.38544	up	--	--	RecName: Full=Leucine-rich repeat receptor protein kinase MSL1; AltName: Full=MSP1 protein homolog 1; AltName: Full=MSP1-like protein 1; Flags: Precursor
Os06g0284200	0.029319	-4.7326	down	--	K23280|0|osa:4340767|uncharacterized protein At1g04910	O-fucosyltransferase 34 [Oryza sativa Japonica Group]
Os03g0410000	0.00408516	-2.02382	down	Molecular Function: nucleic acid binding (GO:0003676);; Cellular Component: intrinsic component of membrane (GO:0031224);;	K09422|4.18243e-63|osa:4333088|anthocyanin regulatory C1 protein	hypothetical protein OsJ_10694 [Oryza sativa Japonica Group]
Os06g0573600	0.00685007	-2.19785	down	--	--	beta-galactosidase 9 [Oryza sativa Japonica Group]
Os05g0151000	0.0468699	1.16406	up	--	--	Os05g0151000 [Oryza sativa Japonica Group]
Os01g0860400	0.029319	-4.7326	down	--	K01183|0|osa:4325066|acidic endochitinase	acidic endochitinase [Oryza sativa Japonica Group]
Os05g0380900	0.00408516	-2.02382	down	Molecular Function: metal ion binding (GO:0046872);;	K13448|3.61887e-99|osa:4338633|probable calcium-binding protein CML15	probable calcium-binding protein CML15 [Oryza sativa Japonica Group]
Os05g0270000	0.029319	-4.7326	down	Molecular Function: structural molecule activity (GO:0005198);; Biological Process: gene expression (GO:0010467);; Molecular Function: rRNA binding (GO:0019843);; Cellular Component: intracellular ribonucleoprotein complex (GO:0030529);; Cellular Component: intracellular membrane-bounded organelle (GO:0043231);;	K02897|7.63878e-177|osa:4338257|50S ribosomal protein L25	uncharacterized protein LOC4338257 [Oryza sativa Japonica Group]
Os10g0558125	0.0446808	-1.61499	down	Molecular Function: endopeptidase activity (GO:0004175);; Cellular Component: extracellular region (GO:0005576);; Biological Process: protein metabolic process (GO:0019538);; Cellular Component: intrinsic component of membrane (GO:0031224);; Molecular Function: transition metal ion binding (GO:0046914);;	--	metalloendoproteinase 4-MMP-like [Oryza sativa Japonica Group]
Os07g0130450	0.00173739	-2.23078	down	Molecular Function: protein kinase activity (GO:0004672);; Biological Process: cellular protein modification process (GO:0006464);; Biological Process: phosphate-containing compound metabolic process (GO:0006796);; Cellular Component: intrinsic component of membrane (GO:0031224);; Molecular Function: purine ribonucleoside binding (GO:0032550);;	--	Os07g0130400, partial [Oryza sativa Japonica Group]
Os01g0686300	0.00408516	-2.02382	down	--	--	gallate 1-beta-glucosyltransferase [Oryza sativa Japonica Group]
Os01g0921100	0.00695975	-1.89191	down	--	--	uncharacterized protein At4g15970 [Oryza sativa Japonica Group]
Os03g0848100	0.000756358	2.38544	up	Biological Process: phosphate-containing compound metabolic process (GO:0006796);; Molecular Function: phosphatase activity (GO:0016791);; Molecular Function: cation binding (GO:0043169);; Cellular Component: intracellular membrane-bounded organelle (GO:0043231);;	--	uncharacterized protein LOC4334778 isoform X2 [Oryza sativa Japonica Group]
Os04g0184500	0.00408516	-2.02382	down	Molecular Function: ligase activity, forming carbon-nitrogen bonds (GO:0016879);;	--	Os04g0184500 [Oryza sativa Japonica Group]
Os07g0215500	0.00408516	-2.02382	down	Molecular Function: endopeptidase inhibitor activity (GO:0004866);; Biological Process: response to stress (GO:0006950);; Biological Process: negative regulation of peptidase activity (GO:0010466);; Cellular Component: intracellular membrane-bounded organelle (GO:0043231);; Cellular Component: extracellular region part (GO:0044421);;	--	seed allergenic protein RA5 [Oryza sativa Japonica Group]
Os02g0752250	0.0304813	1.87352	up	Molecular Function: hydrolase activity, hydrolyzing O-glycosyl compounds (GO:0004553);; Biological Process: carbohydrate metabolic process (GO:0005975);;	--	hypothetical protein OsI_08964 [Oryza sativa Indica Group]
Os07g0252300	0.000756358	2.38544	up	--	--	Os07g0252200, partial [Oryza sativa Japonica Group]
Os01g0675000	0.00408516	-2.02382	down	Molecular Function: Ras guanyl-nucleotide exchange factor activity (GO:0005088);; Biological Process: regulation of GTPase activity (GO:0043087);;	--	rop guanine nucleotide exchange factor 9 [Oryza sativa Japonica Group]
Os12g0484900	0.00173739	-2.23078	down	--	--	Os12g0484900, partial [Oryza sativa Japonica Group]
Os12g0210400	0.0264601	1.02974	up	Molecular Function: protein kinase activity (GO:0004672);; Biological Process: cellular protein modification process (GO:0006464);; Cellular Component: intrinsic component of membrane (GO:0031224);; Molecular Function: purine ribonucleoside binding (GO:0032550);;	--	probable leucine-rich repeat receptor-like protein kinase At5g49770 [Oryza sativa Japonica Group]
Os02g0617600	0.0327501	-1.30477	down	Cellular Component: protein serine/threonine phosphatase complex (GO:0008287);; Biological Process: regulation of phosphoprotein phosphatase activity (GO:0043666);;	K04354|0|osa:9266142|serine/threonine protein phosphatase 2A 55 kDa regulatory subunit B beta isoform isoform X1	serine/threonine protein phosphatase 2A 55 kDa regulatory subunit B beta isoform isoform X1 [Oryza sativa Japonica Group]
Os08g0524400	0.00408516	-2.02382	down	--	--	auxin-induced in root cultures protein 12 [Oryza sativa Japonica Group]
Os04g0691900	0.0446808	-1.61499	down	Molecular Function: kinase activity (GO:0016301);; Molecular Function: purine ribonucleoside binding (GO:0032550);; Biological Process: phosphatidylinositol metabolic process (GO:0046488);;	K00921|0|osa:4337509|1-phosphatidylinositol-3-phosphate 5-kinase FAB1B	1-phosphatidylinositol-3-phosphate 5-kinase FAB1B [Oryza sativa Japonica Group]
Os11g0160100	0.00173739	-2.23078	down	--	--	uncharacterized protein LOC4349846 isoform X1 [Oryza sativa Japonica Group]
Os01g0391600	0.029319	-4.7326	down	--	--	hypothetical protein [Oryza sativa Japonica Group]
Os01g0923900	0.0319595	2.45777	up	--	--	F-box only protein 6 [Oryza sativa Japonica Group]
Os02g0602900	0.00567533	-1.538	down	Cellular Component: intracellular membrane-bounded organelle (GO:0043231);;	--	unnamed protein product [Oryza sativa Japonica Group]
Os11g0269900	0.00408516	-2.02382	down	--	K07517|2.46967e-152|osa:4350260|enoyl-CoA delta isomerase 2, peroxisomal	enoyl-CoA delta isomerase 2, peroxisomal [Oryza sativa Japonica Group]
Os09g0365300	0.0468699	1.16406	up	Molecular Function: purine ribonucleoside binding (GO:0032550);;	--	putative disease resistance RPP13-like protein 1 [Oryza sativa Japonica Group]
Os01g0830200	0.00173739	-2.23078	down	Molecular Function: transition metal ion binding (GO:0046914);;	K10666|0|osa:9270054|uncharacterized protein LOC9270054	uncharacterized protein LOC9270054 [Oryza sativa Japonica Group]
Os10g0538200	0.000756358	2.38544	up	--	--	aspartic proteinase nepenthesin-1 [Oryza sativa Japonica Group]
Os08g0482700	0.0468699	1.16406	up	--	--	unknown protein [Oryza sativa Japonica Group]
Os10g0548700	0.0191364	-2.57341	down	Molecular Function: protein kinase activity (GO:0004672);; Biological Process: phosphate-containing compound metabolic process (GO:0006796);; Molecular Function: ubiquitin-like protein transferase activity (GO:0019787);; Biological Process: protein modification by small protein conjugation (GO:0032446);; Molecular Function: purine ribonucleoside binding (GO:0032550);; Cellular Component: intracel…	--	U-box domain containing protein, expressed [Oryza sativa Japonica Group]
Os03g0302200	0.00567533	-1.538	down	Molecular Function: transition metal ion binding (GO:0046914);;	--	uncharacterized protein LOC4332581 [Oryza sativa Japonica Group]
