# Supplementary material for: Research on lncRNA related to drought resistance of Shanlan upland rice
Source: BMC Genomics. 2022 Apr 30;23:336. doi: 10.1186/s12864-022-08546-0 (PMC9055766; doi:10.1186/s12864-022-08546-0)
Supplement: Supplementary file 9 — Additional file 9: Table S009. Function annotion of mRNAs. [file 12864_2022_8546_MOESM9_ESM.xlsx]

## Sheet: CK1_CK2_CK3_vs_D1_D2_D3.annotat
Table S009. Function annotion of mRNAs
#ID	FDR	log2FC	regulated	GO_annotation	KEGG_annotation	KEGG_pathway_annotation	NR_annotation
Os04g0380500	0.00186839	1.00655	up	--	--	--	uncharacterized protein LOC4335631 [Oryza sativa Japonica Group]
Os06g0604400	0.0346971	-1.01638	down	Molecular Function: phospholipase activity (GO:0004620);; Biological Process: glycerophospholipid metabolic process (GO:0006650);; Molecular Function: metal ion binding (GO:0046872);;	K01115|0|osa:4341469|phospholipase D alpha 2	Glycerophospholipid metabolism (ko00564);; Ether lipid metabolism (ko00565);; Endocytosis (ko04144)	phospholipase D alpha 2 [Oryza sativa Japonica Group]
Os08g0221300	0.00863151	1.01976	up	--	--	--	Os08g0221300, partial [Oryza sativa Japonica Group]
Os07g0644100	0.0376951	2.07563	up	--	--	--	bZIP transcription factor 60 [Oryza sativa Japonica Group]
Os06g0498800	1.2e-10	4.33746	up	--	--	--	protein MOTHER of FT and TFL1 homolog 1 [Oryza sativa Japonica Group]
Os06g0665500	0.0222427	-1.1152	down	Biological Process: allantoin metabolic process (GO:0000255);; Biological Process: purine nucleobase metabolic process (GO:0006144);; Biological Process: ureide metabolic process (GO:0010135);; Molecular Function: hydrolase activity, acting on carbon-nitrogen (but not peptide) bonds, in linear amidines (GO:0016813);; Biological Process: protein metabolic process (GO:0019538);; Molecular Function:…	K02083|0|osa:4341777|probable allantoate deiminase	Purine metabolism (ko00230)	probable allantoate deiminase [Oryza sativa Japonica Group]
Os03g0133300	0.000190692	4.93683	up	--	--	--	uncharacterized protein LOC4331522 [Oryza sativa Japonica Group]
Os04g0482300	0.00433694	-2.27611	down	--	--	--	BTB/POZ and TAZ domain-containing protein 1 isoform X1 [Oryza sativa Japonica Group]
Os03g0594700	0.0210729	1.0656	up	--	--	--	uncharacterized protein LOC4333367 isoform X1 [Oryza sativa Japonica Group]
Os01g0387133	2.79e-06	2.91909	up	--	--	--	Os01g0387133, partial [Oryza sativa Japonica Group]
Os11g0153500	0.000621082	-2.34196	down	--	--	--	protein FAF-like, chloroplastic [Oryza sativa Japonica Group]
Os11g0246200	8.72e-05	1.6684	up	--	--	--	F-box/kelch-repeat protein At2g44130 [Oryza sativa Japonica Group]
Os11g0660500	0.0484829	1.35256	up	Cellular Component: intracellular part (GO:0044424);;	--	--	translationally-controlled tumor protein homolog [Oryza sativa Japonica Group]
Os04g0598200	0.00012559	1.71247	up	--	K02870|4.46788e-112|osa:4336856|60S ribosomal protein L12	Ribosome (ko03010)	hypothetical protein OsI_17237 [Oryza sativa Indica Group]
Os05g0127500	0.0440789	-1.28009	down	--	--	--	probable 2-oxoglutarate-dependent dioxygenase At5g05600 [Oryza sativa Japonica Group]
Os06g0196900	0.00692311	1.07128	up	--	K04078|2.95899e-152|osa:4340394|20 kDa chaperonin, chloroplastic isoform X1	--	20 kDa chaperonin, chloroplastic isoform X1 [Oryza sativa Japonica Group]
Os03g0822900	0.0270144	-1.76473	down	Molecular Function: nucleic acid binding (GO:0003676);; Molecular Function: protein binding (GO:0005515);;	--	--	uncharacterized protein LOC4334613 [Oryza sativa Japonica Group]
Os03g0351400	0.000314163	-1.82285	down	--	--	--	Os03g0351400, partial [Oryza sativa Japonica Group]
Os03g0730400	0.0483799	-1.06207	down	--	--	--	Serine carboxypeptidase family protein, expressed [Oryza sativa Japonica Group]
xxx_newGene_7575	0.000233761	2.63732	up	--	--	--	hypothetical protein OsI_30346 [Oryza sativa Indica Group]
Os04g0461600	0.00867	-1.65167	down	Cellular Component: membrane (GO:0016020);;	--	--	Os04g0461600, partial [Oryza sativa Japonica Group]
Os04g0525200	0.00111408	-2.78987	down	--	--	--	hypothetical protein EE612_024513 [Oryza sativa]
Os04g0644700	0.00605159	2.07752	up	--	K17268|0|osa:4337189|coatomer subunit epsilon-2 isoform X1	--	coatomer subunit epsilon-2 isoform X1 [Oryza sativa Japonica Group]
Os08g0269700	0.00211012	-3.23993	down	Cellular Component: membrane (GO:0016020);;	--	--	uncharacterized protein LOC4345134 [Oryza sativa Japonica Group]
Os10g0416800	1.51e-05	6.08761	up	--	--	--	chitinase 2 [Oryza sativa Japonica Group]
Os07g0108800	0.00294605	4.08048	up	Cellular Component: plant-type vacuole (GO:0000325);; Molecular Function: voltage-gated potassium channel activity (GO:0005249);; Biological Process: cellular metal ion homeostasis (GO:0006875);; Cellular Component: intrinsic component of membrane (GO:0031224);; Cellular Component: vacuolar part (GO:0044437);; Molecular Function: metal ion binding (GO:0046872);; Biological Process: cellular potas…	K05389|0|osa:4342213|two pore potassium channel b	--	two pore potassium channel b [Oryza sativa Japonica Group]
Os04g0625200	0.00328625	1.7893	up	Biological Process: phospholipid metabolic process (GO:0006644);; Molecular Function: acylglycerol O-acyltransferase activity (GO:0016411);; Cellular Component: intrinsic component of membrane (GO:0031224);;	--	--	1-acyl-sn-glycerol-3-phosphate acyltransferase [Oryza sativa Japonica Group]
Os03g0761100	0.0338215	2.6964	up	Molecular Function: phosphoprotein phosphatase activity (GO:0004721);; Biological Process: cellular protein modification process (GO:0006464);; Molecular Function: cation binding (GO:0043169);; Cellular Component: intracellular membrane-bounded organelle (GO:0043231);;	--	--	probable protein phosphatase 2C 34 [Oryza sativa Japonica Group]
Os11g0530600	5.69e-05	-2.46424	down	Biological Process: flavonoid metabolic process (GO:0009812);; Molecular Function: transferase activity, transferring acyl groups other than amino-acyl groups (GO:0016747);;	K00660|0|osa:4350636|chalcone synthase 1	Flavonoid biosynthesis (ko00941);; Circadian rhythm - plant (ko04712)	chalcone synthase 1 [Oryza sativa Japonica Group]
Os12g0230600	0.00216033	2.56658	up	--	--	--	uncharacterized protein LOC4351830 [Oryza sativa Japonica Group]
Os07g0273301	0.00181518	2.64058	up	--	--	--	Os07g0273301 [Oryza sativa Japonica Group]
Os01g0971100	0.00967744	-1.50188	down	--	--	--	protein DEHYDRATION-INDUCED 19 homolog 5 [Oryza sativa Japonica Group]
Os10g0389100	0.0460792	1.93122	up	Cellular Component: plastid (GO:0009536);; Cellular Component: intrinsic component of membrane (GO:0031224);; Biological Process: single-organism process (GO:0044699);;	K13545|3.149e-65|osa:4348519|red chlorophyll catabolite reductase	Porphyrin and chlorophyll metabolism (ko00860)	Red chlorophyll catabolite reductase, putative [Oryza sativa Japonica Group]
Os01g0783500	8.34e-05	3.95166	up	Cellular Component: intracellular membrane-bounded organelle (GO:0043231);; Biological Process: response to stimulus (GO:0050896);;	--	--	universal stress protein PHOS32 [Oryza sativa Japonica Group]
Os11g0216400	0.0189575	1.32605	up	Cellular Component: intracellular membrane-bounded organelle (GO:0043231);;	--	--	DAG protein, chloroplastic [Oryza sativa Japonica Group]
Os01g0332800	0.000961842	-2.03984	down	--	K16297|0|osa:4326840|serine carboxypeptidase-like 33 isoform X1	--	serine carboxypeptidase-like 26 isoform X1 [Oryza sativa Japonica Group]
Os05g0500200	2.93e-05	2.63856	up	--	--	--	Os05g0500200 [Oryza sativa Japonica Group]
Os03g0179400	0.00952556	-1.35096	down	Molecular Function: protein kinase activity (GO:0004672);; Biological Process: cellular protein modification process (GO:0006464);; Biological Process: phosphate-containing compound metabolic process (GO:0006796);; Molecular Function: purine ribonucleoside binding (GO:0032550);;	--	--	serine/threonine-protein kinase RIPK [Oryza sativa Japonica Group]
Os10g0555900	0.0271603	-3.77479	down	Biological Process: reproduction (GO:0000003);; Cellular Component: external encapsulating structure (GO:0030312);; Biological Process: external encapsulating structure organization (GO:0045229);;	--	--	expansin-B3 [Oryza sativa Japonica Group]
Os02g0134000	0.0028343	-1.54529	down	--	--	--	Os02g0134000, partial [Oryza sativa Japonica Group]
Os05g0371600	8.64e-05	-3.1823	down	Molecular Function: protein kinase activity (GO:0004672);; Biological Process: cellular protein modification process (GO:0006464);; Biological Process: phosphate-containing compound metabolic process (GO:0006796);; Cellular Component: intrinsic component of membrane (GO:0031224);; Molecular Function: purine ribonucleoside binding (GO:0032550);;	--	--	probable receptor-like protein kinase At2g39360 [Oryza sativa Japonica Group]
Os03g0638200	5.41e-09	2.12696	up	--	--	--	organic cation/carnitine transporter 7 [Oryza sativa Japonica Group]
Os02g0530600	0.00633109	3.89945	up	--	K10798|0|osa:4329546|poly [ADP-ribose] polymerase 3 isoform X3	Base excision repair (ko03410)	poly [ADP-ribose] polymerase 3 isoform X8 [Oryza sativa Japonica Group]
Os06g0105350	0.0195545	-2.92102	down	--	--	--	scarecrow-like protein 6 [Oryza sativa Japonica Group]
Os10g0469700	0.0176197	-2.36339	down	Cellular Component: intrinsic component of membrane (GO:0031224);;	--	--	receptor like protein 21 [Oryza sativa Japonica Group]
Os07g0642600	0.000108953	-1.22266	down	--	--	--	probable mediator of RNA polymerase II transcription subunit 26b [Oryza sativa Japonica Group]
Os08g0559200	0.0158024	1.84807	up	Cellular Component: intracellular ribonucleoprotein complex (GO:0030529);;	K02975|1.43327e-43|osa:4346314|40S ribosomal protein S25-2	Ribosome (ko03010)	ribosomal protein S25 [Zea mays]
Os03g0594400	0.0037904	1.28698	up	--	--	--	sugar transport protein MST2-like [Oryza sativa Japonica Group]
Os03g0598800	3.85e-05	1.57051	up	--	K02877|8.52457e-126|osa:9266562|60S ribosomal protein L15	Ribosome (ko03010)	60S ribosomal protein L15 [Oryza sativa Japonica Group]
Os12g0478200	5.89e-07	7.04972	up	Biological Process: developmental process involved in reproduction (GO:0003006);; Biological Process: response to abscisic acid (GO:0009737);; Biological Process: seed germination (GO:0009845);;	--	--	Os12g0478100, partial [Oryza sativa Japonica Group]
Os11g0417400	0.0286796	-1.48782	down	Molecular Function: phosphoprotein phosphatase activity (GO:0004721);; Biological Process: cellular protein modification process (GO:0006464);; Molecular Function: cation binding (GO:0043169);;	--	--	probable protein phosphatase 2C 75 [Oryza sativa Japonica Group]
Os10g0462900	0.00592516	1.35554	up	Biological Process: protein folding (GO:0006457);; Molecular Function: purine ribonucleoside binding (GO:0032550);; Cellular Component: intracellular membrane-bounded organelle (GO:0043231);;	K04077|0|osa:4348824|chaperonin CPN60-2, mitochondrial	RNA degradation (ko03018)	chaperonin CPN60-2, mitochondrial [Oryza sativa Japonica Group]
Os12g0283900	0.0282192	-1.88574	down	Cellular Component: intracellular membrane-bounded organelle (GO:0043231);;	--	--	pentatricopeptide repeat-containing protein At3g46610 [Oryza sativa Japonica Group]
Os05g0302700	0.00689924	1.42404	up	--	K05863|0|osa:4338353|ADP,ATP carrier protein 1, mitochondrial	--	ADP,ATP carrier protein 1, mitochondrial [Oryza sativa Japonica Group]
Os10g0411700	0.000559569	1.32337	up	--	--	--	Os10g0411700, partial [Oryza sativa Japonica Group]
Os04g0380000	0.000212865	1.51903	up	Cellular Component: intrinsic component of membrane (GO:0031224);;	--	--	Os04g0380000 [Oryza sativa Japonica Group]
Os10g0498300	0.0122034	-1.6228	down	--	--	--	Os10g0498300, partial [Oryza sativa Japonica Group]
Os11g0528400	2.85e-05	-1.80269	down	Cellular Component: intrinsic component of membrane (GO:0031224);;	--	--	uncharacterized protein LOC4350630 [Oryza sativa Japonica Group]
Os03g0352300	0.0264109	1.36203	up	--	K14564|0|osa:4332851|nucleolar protein 56	Ribosome biogenesis in eukaryotes (ko03008)	hypothetical protein EE612_017426 [Oryza sativa]
Os02g0173000	0.0484209	2.63248	up	--	--	--	Os02g0173000, partial [Oryza sativa Japonica Group]
Os02g0689000	0.00212889	2.90601	up	--	--	--	putative invertase inhibitor [Oryza sativa Japonica Group]
Os03g0843800	0.000237403	-3.44739	down	Biological Process: metabolic process (GO:0008152);; Molecular Function: methyltransferase activity (GO:0008168);;	K21552|7.945e-154|osa:4334753|probable thiol methyltransferase 2	--	probable thiol methyltransferase 2 [Oryza sativa Japonica Group]
Os02g0532800	0.000853191	-1.2791	down	--	--	--	uncharacterized protein LOC4329552 [Oryza sativa Japonica Group]
Os11g0599200	7.76e-06	-5.90458	down	Biological Process: flavonoid metabolic process (GO:0009812);; Molecular Function: UDP-glucosyltransferase activity (GO:0035251);;	K08237|0|osa:9266321|UDP-glycosyltransferase 72B3	--	UDP-glycosyltransferase 72B3 [Oryza sativa Japonica Group]
Os11g0470500	0.0073017	-1.90297	down	--	--	--	putative receptor-like protein kinase At4g00960 [Oryza sativa Japonica Group]
Os01g0250600	0.0286796	1.01177	up	Cellular Component: intrinsic component of membrane (GO:0031224);;	--	--	uncharacterized protein LOC4327100 isoform X2 [Oryza sativa Japonica Group]
Os01g0317500	0.0474046	-1.5321	down	--	--	--	phospholipase-like protein [Oryza sativa Japonica Group]
Os04g0674400	0.0421664	2.59523	up	Cellular Component: mitochondrial envelope (GO:0005740);; Biological Process: sulfur compound metabolic process (GO:0006790);; Biological Process: apoptotic process (GO:0006915);; Molecular Function: transferase activity, transferring one-carbon groups (GO:0016741);; Molecular Function: hydrolase activity, acting on glycosyl bonds (GO:0016798);; Cellular Component: nuclear lumen (GO:0031981);; Mo…	K22746|4.43711e-159|osa:4337380|anamorsin homolog 1	--	anamorsin homolog 1 [Oryza sativa Japonica Group]
xxx_newGene_4337	0.00646915	1.02304	up	Molecular Function: purine ribonucleoside binding (GO:0032550);;	--	--	disease resistance protein RGA5-like [Oryza sativa Japonica Group]
Os03g0831500	0.0237567	1.21632	up	--	K01933|0|osa:4334671|phosphoribosylformylglycinamidine cyclo-ligase, chloroplastic	Purine metabolism (ko00230)	hypothetical protein OsJ_13230 [Oryza sativa Japonica Group]
Os12g0150100	0.0059785	1.09585	up	--	K02898|9.73274e-90|osa:4351513|60S ribosomal protein L26-1	Ribosome (ko03010)	60S ribosomal protein L26-1 [Oryza sativa Japonica Group]
Os06g0554200	0.0108705	-1.48022	down	Molecular Function: transition metal ion binding (GO:0046914);;	--	--	Os06g0554200 [Oryza sativa Japonica Group]
Os05g0181250	0.0317305	-1.24609	down	--	--	--	Os05g0181250, partial [Oryza sativa Japonica Group]
Os11g0161200	0.0399522	1.07529	up	Cellular Component: intrinsic component of membrane (GO:0031224);;	--	--	uncharacterized protein LOC112936887 [Oryza sativa Japonica Group]
Os02g0513100	4.73e-12	9.40838	up	--	K15382|0|osa:4329464|bidirectional sugar transporter SWEET15	--	bidirectional sugar transporter SWEET15 [Oryza sativa Japonica Group]
Os06g0710300	0.00379962	1.77016	up	--	--	--	hypothetical protein OsJ_22622 [Oryza sativa Japonica Group]
Os08g0351200	0.0179771	-2.21322	down	Cellular Component: intrinsic component of membrane (GO:0031224);;	--	--	hypothetical protein [Oryza sativa Japonica Group]
Os08g0434300	0.00315885	-1.83928	down	Biological Process: citrate metabolic process (GO:0006101);; Molecular Function: malate dehydrogenase activity (GO:0016615);; Cellular Component: intracellular membrane-bounded organelle (GO:0043231);; Biological Process: dicarboxylic acid metabolic process (GO:0043648);; Biological Process: primary metabolic process (GO:0044238);;	K00026|0|osa:4345657|malate dehydrogenase, chloroplastic	Citrate cycle (TCA cycle) (ko00020);; Cysteine and methionine metabolism (ko00270);; Pyruvate metabolism (ko00620);; Glyoxylate and dicarboxylate metabolism (ko00630);; Carbon fixation in photosynthetic organisms (ko00710);; Carbon metabolism (ko01200)	malate dehydrogenase, chloroplastic isoform X2 [Oryza sativa Japonica Group]
Os03g0775000	0.00230277	-2.15165	down	--	--	--	uncharacterized protein LOC4334283 [Oryza sativa Japonica Group]
Os03g0266300	4.32e-09	6.06023	up	Biological Process: response to reactive oxygen species (GO:0000302);; Biological Process: response to metal ion (GO:0010038);; Cellular Component: intracellular membrane-bounded organelle (GO:0043231);; Biological Process: response to alcohol (GO:0097305);;	K13993|1.10084e-89|osa:4332357|17.9 kDa class I heat shock protein	Protein processing in endoplasmic reticulum (ko04141)	17.9 kDa class I heat shock protein [Oryza sativa Japonica Group]
Os12g0236400	0.0127178	2.65861	up	--	K00939|1.67051e-171|osa:4351850|adenylate kinase 3	Purine metabolism (ko00230);; Thiamine metabolism (ko00730);; Biosynthesis of cofactors (ko01240)	adenylate kinase 3 [Oryza sativa Japonica Group]
Os07g0660400	0.00578262	1.05658	up	--	--	--	unknown protein [Oryza sativa Japonica Group]
Os10g0560400	0.0194159	-1.3004	down	--	--	--	transcription factor GHD7-like [Oryza sativa Japonica Group]
Os09g0465600	0.00130938	-1.22829	down	Biological Process: glucose metabolic process (GO:0006006);; Biological Process: pyruvate metabolic process (GO:0006090);; Molecular Function: intramolecular oxidoreductase activity, interconverting aldoses and ketoses (GO:0016861);; Cellular Component: intracellular membrane-bounded organelle (GO:0043231);;	K01810|0|osa:4347311|glucose-6-phosphate isomerase 1, chloroplastic	Glycolysis / Gluconeogenesis (ko00010);; Pentose phosphate pathway (ko00030);; Starch and sucrose metabolism (ko00500);; Amino sugar and nucleotide sugar metabolism (ko00520);; Carbon metabolism (ko01200)	glucose-6-phosphate isomerase 1, chloroplastic [Oryza sativa Japonica Group]
Os04g0477025	0.00454422	-1.50565	down	--	--	--	BTB/POZ domain-containing protein At1g67900 [Oryza sativa Japonica Group]
Os09g0283600	0.00917565	-1.54224	down	--	--	--	probable E3 ubiquitin-protein ligase ARI9 [Oryza sativa Japonica Group]
Os06g0539400	0.0131321	-2.16775	down	--	--	--	cationic amino acid transporter 8, vacuolar [Oryza sativa Japonica Group]
Os08g0103500	0.0176197	3.01953	up	Biological Process: phosphate-containing compound metabolic process (GO:0006796);; Molecular Function: transferase activity, transferring phosphorus-containing groups (GO:0016772);; Cellular Component: intrinsic component of membrane (GO:0031224);; Molecular Function: phosphoric ester hydrolase activity (GO:0042578);; Biological Process: primary metabolic process (GO:0044238);;	--	--	PI-PLC X domain-containing protein At5g67130 isoform X1 [Oryza sativa Japonica Group]
Os04g0462300	0.0443239	-1.42298	down	Cellular Component: intrinsic component of membrane (GO:0031224);; Cellular Component: intracellular membrane-bounded organelle (GO:0043231);;	--	--	uncharacterized protein LOC4336064 [Oryza sativa Japonica Group]
Os03g0286800	0.0127465	1.07209	up	--	--	--	WD domain containing protein, putative, expressed [Oryza sativa Japonica Group]
Os02g0647900	0.0346971	-1.45588	down	--	K00128|0|osa:4330149|aldehyde dehydrogenase family 3 member F1	Glycolysis / Gluconeogenesis (ko00010);; Ascorbate and aldarate metabolism (ko00053);; Fatty acid degradation (ko00071);; Valine, leucine and isoleucine degradation (ko00280);; Lysine degradation (ko00310);; Arginine and proline metabolism (ko00330);; Histidine metabolism (ko00340);; Tryptophan metabolism (ko00380);; beta-Alanine metabolism (ko00410);; Glycerolipid metabolism (ko00561);; Pyruvate…	aldehyde dehydrogenase family 3 member F1 [Oryza sativa Japonica Group]
Os06g0171900	0.0232798	1.19109	up	--	--	--	uncharacterized WD repeat-containing protein C2A9.03 [Oryza sativa Japonica Group]
Os08g0326600	0.00287797	1.3101	up	--	K01951|0|osa:4345281|GMP synthase [glutamine-hydrolyzing]	Purine metabolism (ko00230)	uncharacterized protein LOC4345281 [Oryza sativa Japonica Group]
Os03g0332100	0.0455919	-1.32563	down	--	K20666|0|osa:4332734|cytochrome P450 714B2 isoform X2	Diterpenoid biosynthesis (ko00904)	cytochrome P450 714B2 isoform X2 [Oryza sativa Japonica Group]
Os07g0691700	0.0313986	-1.4226	down	--	--	--	scar-like domain-containing protein WAVE 5 [Oryza sativa Japonica Group]
Os05g0394900	0.028853	-1.07347	down	--	--	--	probable serine/threonine-protein kinase kinX isoform X1 [Oryza sativa Japonica Group]
Os05g0127200	0.00870842	-1.9073	down	Molecular Function: phospholipase C activity (GO:0004629);; Biological Process: lipid metabolic process (GO:0006629);; Biological Process: signal transduction (GO:0007165);; Cellular Component: cell part (GO:0044464);;	K05857|0|osa:4337686|phosphoinositide phospholipase C 2	Inositol phosphate metabolism (ko00562);; Phosphatidylinositol signaling system (ko04070)	phosphoinositide phospholipase C 2 isoform X1 [Oryza sativa Japonica Group]
Os03g0133800	7.6e-09	8.86932	up	--	--	--	probable acyl-activating enzyme 1, peroxisomal isoform X1 [Oryza sativa Japonica Group]
Os05g0427400	0.00301254	-1.57369	down	Biological Process: L-phenylalanine metabolic process (GO:0006558);; Biological Process: phenylpropanoid biosynthetic process (GO:0009699);; Molecular Function: ammonia-lyase activity (GO:0016841);; Cellular Component: intracellular part (GO:0044424);;	K10775|0|osa:4338861|phenylalanine ammonia-lyase	Phenylalanine metabolism (ko00360);; Phenylpropanoid biosynthesis (ko00940)	phenylalanine ammonia-lyase [Oryza sativa Japonica Group]
Os05g0439400	0.000576869	-1.76047	down	Molecular Function: ubiquitin-like protein transferase activity (GO:0019787);; Biological Process: protein modification by small protein conjugation (GO:0032446);;	--	--	U-box domain-containing protein 29 [Oryza sativa Japonica Group]
Os07g0535800	0.00748304	2.98796	up	Molecular Function: protein kinase activity (GO:0004672);; Biological Process: cellular protein modification process (GO:0006464);; Biological Process: phosphate-containing compound metabolic process (GO:0006796);; Cellular Component: intrinsic component of membrane (GO:0031224);; Molecular Function: purine ribonucleoside binding (GO:0032550);;	--	--	receptor-like protein kinase-like [Oryza sativa Japonica Group]
Os02g0274100	0.0435429	2.36895	up	Cellular Component: cell-cell junction (GO:0005911);; Biological Process: fatty acid catabolic process (GO:0009062);; Cellular Component: plastid (GO:0009536);; Biological Process: jasmonic acid metabolic process (GO:0009694);; Cellular Component: microtubule cytoskeleton (GO:0015630);; Molecular Function: tubulin binding (GO:0015631);; Molecular Function: oxidoreductase activity, acting on the C…	K10527|0|osa:4328997|peroxisomal fatty acid beta-oxidation multifunctional protein	Fatty acid degradation (ko00071);; alpha-Linolenic acid metabolism (ko00592);; Fatty acid metabolism (ko01212)	peroxisomal fatty acid beta-oxidation multifunctional protein [Oryza sativa Japonica Group]
Os06g0274300	0.00236554	-1.61358	down	--	--	--	LRR receptor kinase SERL2-like [Oryza sativa Japonica Group]
Os10g0167300	0.0381355	1.54736	up	--	--	--	Os10g0167300 [Oryza sativa Japonica Group]
Os05g0232200	0.0461053	-1.63363	down	--	--	--	hypothetical protein OsI_19064 [Oryza sativa Indica Group]
Os05g0566300	0.0471335	1.65459	up	--	--	--	unknown protein [Oryza sativa Japonica Group]
Os11g0283500	0.027448	-1.70501	down	Cellular Component: intrinsic component of membrane (GO:0031224);; Biological Process: establishment of localization (GO:0051234);;	--	--	hypothetical protein EE612_054782 [Oryza sativa]
Os09g0345300	1.03e-06	-3.01984	down	Molecular Function: protein kinase activity (GO:0004672);; Biological Process: cellular protein modification process (GO:0006464);; Biological Process: phosphate-containing compound metabolic process (GO:0006796);; Cellular Component: intrinsic component of membrane (GO:0031224);; Molecular Function: purine ribonucleoside binding (GO:0032550);;	--	--	leucine-rich repeat family protein /protein kinase family protein-like [Oryza sativa Japonica Group]
Os07g0240600	0.00170248	-2.00115	down	--	--	--	DIMBOA UDP-glucosyltransferase BX8 [Oryza sativa Japonica Group]
Os11g0156401	5.4e-06	-1.88397	down	--	--	--	transcription repressor OFP8-like [Oryza sativa Japonica Group]
Os08g0300300	0.0442194	1.0994	up	Molecular Function: chloride channel activity (GO:0005254);; Biological Process: inorganic anion transport (GO:0015698);; Cellular Component: intrinsic component of membrane (GO:0031224);; Biological Process: regulation of ion transmembrane transport (GO:0034765);;	K05016|0|osa:4345218|putative chloride channel-like protein CLC-g	--	putative chloride channel-like protein CLC-g [Oryza sativa Japonica Group]
Os03g0381300	0.0465129	1.51324	up	--	--	--	co-chaperone protein p23-1 [Oryza sativa Japonica Group]
Os04g0502300	0.00447839	1.14998	up	--	K02949|3.3541e-99|osa:4336317|40S ribosomal protein S11	Ribosome (ko03010)	40S ribosomal protein S11 [Oryza sativa Japonica Group]
Os07g0539300	4.87e-08	7.81085	up	--	--	--	glucan endo-1,3-beta-glucosidase 12 [Oryza sativa Japonica Group]
Os08g0366000	0.040525	1.69461	up	--	K01595|0|osa:4345387|phosphoenolpyruvate carboxylase 2	Pyruvate metabolism (ko00620);; Carbon fixation in photosynthetic organisms (ko00710);; Carbon metabolism (ko01200)	phosphoenolpyruvate carboxylase 2 [Oryza sativa Japonica Group]
Os01g0788400	0.0249437	3.44927	up	--	K01051|0|osa:4325861|pectinesterase	Pentose and glucuronate interconversions (ko00040)	pectinesterase [Oryza sativa Japonica Group]
Os08g0489100	0.0130209	-1.83582	down	--	--	--	flavonol 3-O-glucosyltransferase UGT89B1 [Oryza sativa Japonica Group]
Os04g0683850	0.0308413	-1.83088	down	Molecular Function: peroxidase activity (GO:0004601);; Biological Process: response to stress (GO:0006950);; Biological Process: single-organism metabolic process (GO:0044710);; Biological Process: cellular detoxification (GO:1990748);;	K00432|1.39247e-83|obr:102701442|probable phospholipid hydroperoxide glutathione peroxidase	Glutathione metabolism (ko00480);; Arachidonic acid metabolism (ko00590)	PREDICTED: probable phospholipid hydroperoxide glutathione peroxidase isoform X1 [Oryza brachyantha]
Os03g0694000	9.75e-09	7.18582	up	--	--	--	germin-like protein 3-6 [Oryza sativa Japonica Group]
Os04g0443200	0.0102581	1.27868	up	--	--	--	uncharacterized protein LOC4335943 [Oryza sativa Japonica Group]
Os05g0323900	0.00482826	2.18633	up	Molecular Function: catalytic activity (GO:0003824);; Biological Process: superoxide metabolic process (GO:0006801);; Molecular Function: antioxidant activity (GO:0016209);; Molecular Function: cation binding (GO:0043169);; Cellular Component: mitochondrial part (GO:0044429);; Biological Process: single-organism metabolic process (GO:0044710);;	K04564|3.25809e-154|osa:4338417|superoxide dismutase [Mn], mitochondrial	Peroxisome (ko04146)	superoxide dismutase [Mn], mitochondrial [Oryza sativa Japonica Group]
CAA33990	0.0483886	-1.363	down	Biological Process: ATP biosynthetic process (GO:0006754);; Biological Process: hydrogen transport (GO:0006818);; Cellular Component: chloroplast thylakoid (GO:0009534);; Molecular Function: monovalent inorganic cation transmembrane transporter activity (GO:0015077);; Molecular Function: cation-transporting ATPase activity (GO:0019829);; Cellular Component: intrinsic component of membrane (GO:003…	K02108|2.67751e-151|osa:3131393|atpI, OrsajCp019; ATP synthase CF0 A subunit	Oxidative phosphorylation (ko00190);; Photosynthesis (ko00195)	ATP synthase CF0 A subunit (plastid) [Oryza sativa Japonica Group]
Os10g0320100	7.15e-05	-2.95198	down	--	K05280|0|osa:4348304|flavonoid 3'-monooxygenase	Flavonoid biosynthesis (ko00941);; Flavone and flavonol biosynthesis (ko00944)	flavonoid 3&apos;-monooxygenase CYP75B3-like [Oryza sativa Japonica Group]
Os01g0256500	0.0303883	2.80814	up	Cellular Component: intrinsic component of membrane (GO:0031224);; Cellular Component: intracellular membrane-bounded organelle (GO:0043231);; Biological Process: response to stimulus (GO:0050896);;	--	--	Zn-induced protein [Oryza sativa]
Os07g0589600	0.0361425	2.39489	up	--	--	--	zinc finger CCCH domain-containing protein 18 [Oryza sativa Japonica Group]
Os03g0301400	0.0245196	-1.0528	down	Molecular Function: nuclease activity (GO:0004518);; Biological Process: DNA catabolic process (GO:0006308);; Cellular Component: intracellular membrane-bounded organelle (GO:0043231);; Molecular Function: transition metal ion binding (GO:0046914);; Molecular Function: organic cyclic compound binding (GO:0097159);;	--	--	exonuclease DPD1, chloroplastic/mitochondrial isoform X3 [Oryza sativa Japonica Group]
Os10g0389200	0.000210431	2.16114	up	Cellular Component: intracellular membrane-bounded organelle (GO:0043231);;	K13545|2.11021e-172|osa:4348519|red chlorophyll catabolite reductase	Porphyrin and chlorophyll metabolism (ko00860)	red chlorophyll catabolite reductase [Oryza sativa Japonica Group]
Os01g0686800	5.96e-06	1.63984	up	--	K14753|0|osa:4324115|guanine nucleotide-binding protein subunit beta-like protein A	--	guanine nucleotide-binding protein subunit beta-like protein A [Oryza sativa Japonica Group]
Os02g0649300	8.8e-21	7.8038	up	Molecular Function: nucleic acid binding transcription factor activity (GO:0001071);; Molecular Function: DNA binding (GO:0003677);; Biological Process: transcription, DNA-templated (GO:0006351);; Cellular Component: intracellular membrane-bounded organelle (GO:0043231);;	--	--	homeobox-leucine zipper protein HOX24 [Oryza sativa Japonica Group]
Os04g0662700	0.0137776	-1.07172	down	--	K01495|0|osa:4337297|GTP cyclohydrolase 1	Folate biosynthesis (ko00790);; Biosynthesis of cofactors (ko01240)	LOW QUALITY PROTEIN: GTP cyclohydrolase 1 [Oryza sativa Japonica Group]
Os01g0548600	7.77e-07	7.02406	up	--	--	--	Os01g0548600, partial [Oryza sativa Japonica Group]
Os03g0628800	0.0429882	-1.61596	down	Biological Process: phosphate-containing compound metabolic process (GO:0006796);; Molecular Function: transferase activity, transferring phosphorus-containing groups (GO:0016772);; Molecular Function: purine ribonucleoside binding (GO:0032550);;	--	--	uncharacterized protein LOC4333506 [Oryza sativa Japonica Group]
Os09g0482000	0.00236554	1.96556	up	Cellular Component: intracellular membrane-bounded organelle (GO:0043231);;	--	--	plant UBX domain-containing protein 10 [Oryza sativa Japonica Group]
Os04g0582000	0.000407993	2.66949	up	--	--	--	Os04g0582000 [Oryza sativa Japonica Group]
Os02g0203000	0.000225244	-1.85608	down	--	K16241|1.69391e-95|osa:4328662|transcription factor HY5	Circadian rhythm - plant (ko04712)	transcription factor HY5 [Oryza sativa Japonica Group]
Os12g0625000	0.014527	-1.05253	down	--	--	--	Os12g0625000, partial [Oryza sativa Japonica Group]
Os02g0601100	0.0377103	2.12743	up	Biological Process: sulfur compound metabolic process (GO:0006790);; Molecular Function: purine ribonucleoside binding (GO:0032550);; Molecular Function: cation binding (GO:0043169);; Cellular Component: intracellular part (GO:0044424);; Molecular Function: iron-sulfur cluster binding (GO:0051536);;	--	--	Os02g0601100, partial [Oryza sativa Japonica Group]
Os04g0485800	0.0356496	2.48934	up	--	--	--	F-box protein SKIP14 [Oryza sativa Japonica Group]
Os06g0600301	0.00248655	2.62249	up	--	--	--	RecName: Full=GTP-binding nuclear protein Ran-3; Short=OsRan3; AltName: Full=Ras-related nuclear protein 3
Os09g0397300	0.0013767	1.40197	up	--	--	--	putative trehalose-6-phosphate synthase/phosphatase [Oryza sativa Japonica Group]
Os01g0874800	0.0310831	1.31952	up	--	--	--	putative DNA polymerase I 3&apos;-5&apos; exo domain [Oryza sativa Japonica Group]
Os01g0200300	0.00145713	1.94867	up	Molecular Function: nucleic acid binding (GO:0003676);; Biological Process: transcription, DNA-templated (GO:0006351);; Cellular Component: intracellular membrane-bounded organelle (GO:0043231);;	K09338|0|osa:4327348|homeobox-leucine zipper protein HOX29	--	homeobox-leucine zipper protein HOX29 [Oryza sativa Japonica Group]
Os03g0130300	1.27e-11	8.46806	up	Biological Process: cell killing (GO:0001906);; Biological Process: response to stress (GO:0006950);; Biological Process: response to fungus (GO:0009620);; Cellular Component: intrinsic component of membrane (GO:0031224);;	--	--	defensin-like protein [Oryza sativa Japonica Group]
Os01g0921800	0.000397025	-1.44763	down	Cellular Component: intracellular membrane-bounded organelle (GO:0043231);;	--	--	hypothetical protein OsI_04973 [Oryza sativa Indica Group]
Os08g0244500	3e-05	6.84075	up	--	--	--	Os08g0244500 [Oryza sativa Japonica Group]
Os03g0748300	0.0228208	1.85491	up	Molecular Function: binding (GO:0005488);; Cellular Component: plastid (GO:0009536);; Biological Process: photosynthetic electron transport chain (GO:0009767);; Biological Process: gene expression (GO:0010467);; Biological Process: primary metabolic process (GO:0044238);;	--	--	protein NDH-DEPENDENT CYCLIC ELECTRON FLOW 5 [Oryza sativa Japonica Group]
Os11g0672800	0.0180495	2.83337	up	Cellular Component: intrinsic component of membrane (GO:0031224);; Cellular Component: intracellular membrane-bounded organelle (GO:0043231);;	--	--	hypothetical protein OsJ_00136 [Oryza sativa Japonica Group]
Os03g0188500	0.0259578	4.39267	up	--	--	--	hypothetical protein OsJ_09711 [Oryza sativa Japonica Group]
Os04g0606000	0.000467405	4.98708	up	Molecular Function: transferase activity, transferring acyl groups (GO:0016746);; Cellular Component: intracellular membrane-bounded organelle (GO:0043231);;	--	--	phenolic glucoside malonyltransferase 1 [Oryza sativa Japonica Group]
Os06g0288100	0.00114464	-1.77773	down	Molecular Function: protein kinase activity (GO:0004672);; Biological Process: protein phosphorylation (GO:0006468);; Biological Process: defense response (GO:0006952);; Biological Process: cell death (GO:0008219);; Cellular Component: intrinsic component of membrane (GO:0031224);; Molecular Function: purine ribonucleoside binding (GO:0032550);;	--	--	leucine-rich repeat receptor-like serine/threonine/tyrosine-protein kinase SOBIR1 [Oryza sativa Japonica Group]
Os07g0187400	0.0118562	-1.05062	down	--	--	--	uncharacterized protein ycf45 [Oryza sativa Japonica Group]
Os10g0492900	6.79e-13	5.33396	up	--	--	--	Os10g0492900 [Oryza sativa Japonica Group]
Os10g0463800	0.00129667	4.3111	up	Cellular Component: intracellular membrane-bounded organelle (GO:0043231);;	--	--	uncharacterized protein LOC4348829 [Oryza sativa Japonica Group]
Os03g0416300	0.0115971	-2.28798	down	Biological Process: extracellular matrix organization (GO:0030198);; Cellular Component: intrinsic component of membrane (GO:0031224);; Biological Process: growth (GO:0040007);;	--	--	COBRA-like protein 2 [Oryza sativa Japonica Group]
Os09g0541000	0.00924382	-2.60643	down	--	K09872|1.60794e-180|osa:4347729|probable aquaporin PIP2-7	--	probable aquaporin PIP2-7 [Oryza sativa Japonica Group]
Os09g0109600	2.46e-16	7.71772	up	--	--	--	uncharacterized protein LOC4346387 [Oryza sativa Japonica Group]
xxx_newGene_6	0.0365461	1.11367	up	Cellular Component: intrinsic component of membrane (GO:0031224);;	--	--	Os11g0417700, partial [Oryza sativa Japonica Group]
Os06g0604300	2.93e-05	-3.65906	down	Molecular Function: phospholipase activity (GO:0004620);; Biological Process: glycerophospholipid metabolic process (GO:0006650);; Molecular Function: metal ion binding (GO:0046872);;	K01115|0|osa:4341468|phospholipase D alpha 2-like	Glycerophospholipid metabolism (ko00564);; Ether lipid metabolism (ko00565);; Endocytosis (ko04144)	phospholipase D alpha 2-like [Oryza sativa Japonica Group]
Os03g0750700	0.0111417	-1.66292	down	--	--	--	protein STRICTOSIDINE SYNTHASE-LIKE 3 [Oryza sativa Japonica Group]
Os01g0209800	0.00168598	-2.41049	down	--	--	--	cationic amino acid transporter 5 [Oryza sativa Japonica Group]
Os07g0187200	0.00315209	1.27718	up	Molecular Function: nucleotide binding (GO:0000166);; Molecular Function: oxidoreductase activity, acting on CH-OH group of donors (GO:0016614);; Biological Process: cellular metabolic compound salvage (GO:0043094);; Cellular Component: intracellular membrane-bounded organelle (GO:0043231);; Biological Process: single-organism metabolic process (GO:0044710);;	K18204|7.63194e-64|osa:4342598|probable D-2-hydroxyglutarate dehydrogenase, mitochondrial	--	probable D-2-hydroxyglutarate dehydrogenase, mitochondrial [Oryza sativa Japonica Group]
Os11g0433900	0.00194027	1.3478	up	--	K02923|1.54992e-41|osa:4343529|60S ribosomal protein L38	Ribosome (ko03010)	60S ribosomal protein L38 [Oryza sativa Japonica Group]
Os08g0112400	0.0408366	2.19137	up	--	--	--	putative pentatricopeptide (PPR) repeat-containing protein [Oryza sativa Japonica Group]
Os03g0773150	0.0290608	1.78849	up	Molecular Function: nucleic acid binding (GO:0003676);; Molecular Function: structural molecule activity (GO:0005198);; Biological Process: gene expression (GO:0010467);; Cellular Component: small ribosomal subunit (GO:0015935);; Cellular Component: intrinsic component of membrane (GO:0031224);; Cellular Component: intracellular membrane-bounded organelle (GO:0043231);;	K02980|1.34348e-32|jre:108996289|40S ribosomal protein S29-like	Ribosome (ko03010)	hypothetical protein SETIT_9G073900v2 [Setaria italica]
Os03g0284500	0.0145412	-1.34315	down	--	--	--	uncharacterized protein YKR070W isoform X1 [Oryza sativa Japonica Group]
xxx_newGene_11592	0.000238836	3.95175	up	--	--	--	hypothetical protein MTR_0021s0160 [Medicago truncatula]
Os08g0174100	6.15e-10	-2.19345	down	--	--	--	unnamed protein product [Triticum turgidum subsp. durum]
Os06g0128100	0.00376416	1.45708	up	--	--	--	probable methyltransferase PMT15 [Oryza sativa Japonica Group]
Os02g0247800	0.0130209	3.13168	up	--	--	--	sodium/calcium exchanger NCL2-like [Oryza sativa Japonica Group]
Os03g0851000	0.0291125	1.39229	up	Biological Process: transcription, DNA-templated (GO:0006351);; Cellular Component: intrinsic component of membrane (GO:0031224);;	--	--	basic transcription factor 3 [Oryza sativa Japonica Group]
Os09g0441650	0.0369886	-1.58862	down	--	--	--	cytochrome P450 71A1 [Oryza sativa Japonica Group]
Os05g0434800	5.24e-10	-3.43339	down	Cellular Component: intrinsic component of membrane (GO:0031224);;	--	--	Os05g0434800 [Oryza sativa Japonica Group]
Os09g0474300	0.000239318	1.68203	up	Molecular Function: protein binding (GO:0005515);; Biological Process: cellular process (GO:0009987);; Molecular Function: purine ribonucleoside binding (GO:0032550);; Cellular Component: intracellular membrane-bounded organelle (GO:0043231);; Biological Process: response to stimulus (GO:0050896);;	--	--	Os09g0474300 [Oryza sativa Japonica Group]
Os12g0271700	0.0259555	-1.24419	down	Biological Process: isoprenoid metabolic process (GO:0006720);; Cellular Component: plastid (GO:0009536);; Molecular Function: transferase activity, transferring alkyl or aryl (other than methyl) groups (GO:0016765);; Molecular Function: cation binding (GO:0043169);;	K05356|0|osa:4351957|probable solanesyl-diphosphate synthase 3, chloroplastic	Terpenoid backbone biosynthesis (ko00900)	Os12g0271700, partial [Oryza sativa Japonica Group]
Os03g0805100	0.00633109	2.42261	up	Molecular Function: farnesyltranstransferase activity (GO:0004311);; Biological Process: lipid metabolic process (GO:0006629);; Cellular Component: intrinsic component of membrane (GO:0031224);;	K00801|0|osa:4334492|squalene synthase	Steroid biosynthesis (ko00100);; Sesquiterpenoid and triterpenoid biosynthesis (ko00909)	squalene synthase [Oryza sativa Japonica Group]
Os03g0859900	1.4e-10	4.14629	up	Cellular Component: plastid (GO:0009536);;	--	--	Os03g0859900, partial [Oryza sativa Japonica Group]
Os10g0521000	0.0397909	3.52353	up	Biological Process: trehalose metabolic process (GO:0005991);; Molecular Function: trehalase activity (GO:0015927);; Cellular Component: membrane (GO:0016020);;	K01194|0|osa:4349141|probable trehalase	Starch and sucrose metabolism (ko00500)	probable trehalase [Oryza sativa Japonica Group]
Os09g0526600	0.00958021	2.22441	up	Molecular Function: nucleic acid binding transcription factor activity (GO:0001071);; Molecular Function: DNA binding (GO:0003677);; Biological Process: transcription, DNA-templated (GO:0006351);; Cellular Component: membrane (GO:0016020);; Cellular Component: intracellular membrane-bounded organelle (GO:0043231);;	K09419|2.07337e-180|osa:4347637|heat stress transcription factor B-2c isoform X1	--	heat stress transcription factor B-2c isoform X3 [Oryza sativa Japonica Group]
Os07g0683200	0.0043391	2.11493	up	Molecular Function: nucleic acid binding (GO:0003676);; Biological Process: transcription, DNA-templated (GO:0006351);; Cellular Component: intracellular membrane-bounded organelle (GO:0043231);;	--	--	NAC transcription factor 29 [Oryza sativa Japonica Group]
Os08g0156800	0.00310597	1.29447	up	--	K02915|2.28387e-63|osa:4344696|60S ribosomal protein L34	Ribosome (ko03010)	PREDICTED: 60S ribosomal protein L34-like [Oryza brachyantha]
Os01g0867300	3.61e-13	4.66223	up	Molecular Function: nucleic acid binding transcription factor activity (GO:0001071);; Molecular Function: DNA binding (GO:0003677);; Biological Process: transcription, DNA-templated (GO:0006351);; Cellular Component: intracellular membrane-bounded organelle (GO:0043231);;	K14432|1.61514e-138|osa:4325078|G-box-binding factor 4	Plant hormone signal transduction (ko04075)	bZIP transcription factor 12-like [Oryza sativa Japonica Group]
Os04g0209200	0.00426539	3.90846	up	--	--	--	ABC transporter C family member 14 isoform X2 [Oryza sativa Japonica Group]
Os03g0103200	0.0427912	-2.27718	down	Molecular Function: hydrolase activity (GO:0016787);; Biological Process: protein metabolic process (GO:0019538);;	--	--	cortical cell-delineating protein [Oryza sativa Japonica Group]
Os11g0110100	4.45e-05	1.6364	up	Cellular Component: intracellular membrane-bounded organelle (GO:0043231);;	--	--	Os11g0110100, partial [Oryza sativa Japonica Group]
Os10g0537500	0.046726	2.17448	up	Cellular Component: intrinsic component of membrane (GO:0031224);;	--	--	Os10g0537500, partial [Oryza sativa Japonica Group]
Os02g0683900	0.000364894	-1.53346	down	Cellular Component: intrinsic component of membrane (GO:0031224);;	--	--	Os02g0683900 [Oryza sativa Japonica Group]
Os06g0700500	0.0223445	1.53943	up	Molecular Function: UDP-glycosyltransferase activity (GO:0008194);; Cellular Component: intrinsic component of membrane (GO:0031224);;	--	--	uncharacterized protein LOC4341964 isoform X1 [Oryza sativa Japonica Group]
Os01g0106400	4.97e-05	2.93689	up	--	K23050|0|osa:4326149|isoflavone reductase homolog IRL	--	isoflavone reductase homolog IRL [Oryza sativa Japonica Group]
Os09g0509100	0.0012269	-2.40801	down	Molecular Function: nucleic acid binding (GO:0003676);; Biological Process: transcription, DNA-templated (GO:0006351);; Cellular Component: intracellular membrane-bounded organelle (GO:0043231);;	--	--	NAC domain-containing protein 83 [Oryza sativa Japonica Group]
Os07g0175500	0.0063906	1.87009	up	--	--	--	Os07g0175500, partial [Oryza sativa Japonica Group]
Os03g0665800	0.0182892	1.28048	up	Cellular Component: intrinsic component of membrane (GO:0031224);; Cellular Component: intracellular membrane-bounded organelle (GO:0043231);;	--	--	hypothetical protein OsI_12907 [Oryza sativa Indica Group]
Os12g0123700	5.69e-05	2.7098	up	Molecular Function: nucleic acid binding (GO:0003676);; Biological Process: transcription, DNA-templated (GO:0006351);; Cellular Component: intracellular membrane-bounded organelle (GO:0043231);;	--	--	NAC transcription factor 29 [Oryza sativa Japonica Group]
Os10g0112500	0.0182706	-2.07079	down	--	--	--	protein NRT1/ PTR FAMILY 8.3 [Oryza sativa Japonica Group]
Os09g0420900	0.000725343	1.44274	up	Biological Process: cell communication (GO:0007154);; Biological Process: hormone transport (GO:0009914);; Biological Process: system development (GO:0048731);;	--	--	BTB/POZ domain-containing protein NPY1 [Oryza sativa Japonica Group]
Os03g0820600	0.00247024	1.80277	up	--	K05765|1.24834e-92|osa:4334595|actin-depolymerizing factor 4	--	actin-depolymerizing factor 4 [Oryza sativa Japonica Group]
Os01g0303600	0.00329389	4.372	up	Cellular Component: intrinsic component of membrane (GO:0031224);; Molecular Function: transition metal ion binding (GO:0046914);;	--	--	uncharacterized protein LOC4323902 [Oryza sativa Japonica Group]
Os04g0504000	0.0120054	-1.28005	down	Molecular Function: transferase activity, transferring pentosyl groups (GO:0016763);; Cellular Component: intrinsic component of membrane (GO:0031224);; Biological Process: purine nucleobase salvage (GO:0043096);; Cellular Component: intracellular part (GO:0044424);;	--	--	OSJNBa0014K14.11 [Oryza sativa Japonica Group]
Os06g0601600	0.000218328	-2.05652	down	Molecular Function: cellulose synthase activity (GO:0016759);; Biological Process: cellulose metabolic process (GO:0030243);; Cellular Component: intrinsic component of membrane (GO:0031224);; Biological Process: external encapsulating structure organization (GO:0045229);;	--	--	Os06g0601600, partial [Oryza sativa Japonica Group]
Os02g0555600	0.00122937	-2.16432	down	Molecular Function: carboxylic acid binding (GO:0031406);;	--	--	ACT domain-containing protein ACR3 isoform X1 [Oryza sativa Japonica Group]
Os04g0583900	8.16e-05	6.15644	up	Molecular Function: nucleic acid binding (GO:0003676);; Biological Process: transcription, DNA-templated (GO:0006351);; Cellular Component: intracellular membrane-bounded organelle (GO:0043231);;	--	--	hypothetical protein OsJ_15918 [Oryza sativa Japonica Group]
Os02g0697450	0.00143857	-2.45915	down	--	K01904|0|osa:4330407|probable 4-coumarate--CoA ligase 2	Ubiquinone and other terpenoid-quinone biosynthesis (ko00130);; Phenylpropanoid biosynthesis (ko00940)	hypothetical protein OsJ_08027 [Oryza sativa Japonica Group]
Os07g0546200	3.37e-05	-1.82527	down	--	--	--	Os07g0546200, partial [Oryza sativa Japonica Group]
Os01g0609900	0.000493882	6.36927	up	--	--	--	Os01g0609900, partial [Oryza sativa Japonica Group]
Os06g0701100	0.0150565	1.02619	up	--	K03257|0|osa:4341966|eukaryotic initiation factor 4A-1	RNA transport (ko03013)	eukaryotic initiation factor 4A-1 [Oryza sativa Japonica Group]
Os01g0971600	0.00841751	3.84482	up	Molecular Function: nucleotide binding (GO:0000166);; Biological Process: glycerol-3-phosphate metabolic process (GO:0006072);; Molecular Function: oxidoreductase activity, acting on the CH-OH group of donors, NAD or NADP as acceptor (GO:0016616);; Biological Process: primary metabolic process (GO:0044238);; Cellular Component: cytoplasmic part (GO:0044444);; Biological Process: single-organism m…	--	--	glycerol-3-phosphate dehydrogenase [NAD(+)] [Oryza sativa Japonica Group]
Os02g0769100	0.0462858	-1.34309	down	--	K14488|9.92401e-35|osa:4330855|auxin-responsive protein SAUR32	Plant hormone signal transduction (ko04075)	auxin-responsive protein SAUR32 [Oryza sativa Japonica Group]
Os06g0681200	2.99e-08	8.99202	up	--	--	--	hypothetical protein EE612_036093 [Oryza sativa]
Os04g0577200	0.00166092	1.18767	up	--	--	--	rho GTPase-activating protein 5 [Oryza sativa Japonica Group]
Os02g0322400	0.0312417	-1.81858	down	--	--	--	mitogen-activated protein kinase kinase kinase 18 [Oryza sativa Japonica Group]
Os01g0767600	0.0158373	3.89857	up	--	--	--	uncharacterized protein LOC4325501 isoform X1 [Oryza sativa Japonica Group]
Os07g0288700	0.0105278	-3.22104	down	--	--	--	ABC transporter G family member 11 [Oryza sativa Japonica Group]
Os11g0634500	0.00190604	1.64015	up	--	K02980|2.60162e-30|osa:9267266|40S ribosomal protein S29	Ribosome (ko03010)	Os11g0634500 [Oryza sativa Japonica Group]
Os03g0305050	0.0251359	-1.1044	down	--	K01913|0|osa:4332592|acetate/butyrate--CoA ligase AAE7, peroxisomal	Glycolysis / Gluconeogenesis (ko00010);; Pyruvate metabolism (ko00620);; Glyoxylate and dicarboxylate metabolism (ko00630);; Butanoate metabolism (ko00650);; Carbon metabolism (ko01200)	acetate/butyrate--CoA ligase AAE7, peroxisomal [Oryza sativa Japonica Group]
Os10g0417600	0.000729552	1.18178	up	Molecular Function: racemase and epimerase activity, acting on carbohydrates and derivatives (GO:0016857);; Biological Process: L-ascorbic acid metabolic process (GO:0019852);; Molecular Function: cofactor binding (GO:0048037);;	K10046|0|osa:4348636|GDP-mannose 3,5-epimerase 1	Ascorbate and aldarate metabolism (ko00053);; Amino sugar and nucleotide sugar metabolism (ko00520);; Biosynthesis of cofactors (ko01240)	GDP-mannose 3,5-epimerase 1 [Oryza sativa Japonica Group]
Os11g0530650	0.000119719	-2.68561	down	Biological Process: flavonoid metabolic process (GO:0009812);; Molecular Function: transferase activity, transferring acyl groups other than amino-acyl groups (GO:0016747);;	K00660|0|osa:4350636|chalcone synthase 1	Flavonoid biosynthesis (ko00941);; Circadian rhythm - plant (ko04712)	chalcone synthase 1 [Oryza sativa Japonica Group]
Os05g0491500	0.0189575	-2.61484	down	Molecular Function: nucleic acid binding (GO:0003676);; Biological Process: transcription, DNA-templated (GO:0006351);; Cellular Component: intracellular membrane-bounded organelle (GO:0043231);;	--	--	hypothetical protein OsJ_19028 [Oryza sativa Japonica Group]
Os01g0872100	0.0018861	-1.34243	down	--	--	--	uncharacterized protein LOC4324947 [Oryza sativa Japonica Group]
Os07g0681300	0.00682983	-2.09987	down	--	K20666|0|osa:4344303|cytochrome P450 714B1	Diterpenoid biosynthesis (ko00904)	putative cytochrome P450 [Oryza sativa Japonica Group]
Os03g0214100	0.0207519	1.28425	up	Molecular Function: nucleic acid binding (GO:0003676);; Biological Process: DNA metabolic process (GO:0006259);; Biological Process: cellular response to stress (GO:0033554);; Molecular Function: cation binding (GO:0043169);; Cellular Component: intracellular membrane-bounded organelle (GO:0043231);; Cellular Component: protein complex (GO:0043234);;	K07466|0|osa:4332052|replication protein A 70 kDa DNA-binding subunit B	DNA replication (ko03030);; Nucleotide excision repair (ko03420);; Mismatch repair (ko03430);; Homologous recombination (ko03440)	replication protein A 70 kDa DNA-binding subunit B [Oryza sativa Japonica Group]
Os01g0710200	0.00166092	-3.11059	down	--	K12259|0|osa:4327828|probable polyamine oxidase 5	Arginine and proline metabolism (ko00330);; beta-Alanine metabolism (ko00410)	probable polyamine oxidase 5 [Oryza sativa Japonica Group]
Os01g0179600	0.000122456	-2.72835	down	--	--	--	crocetin glucosyltransferase, chloroplastic [Oryza sativa Japonica Group]
Os10g0486100	0.00031185	2.03488	up	Molecular Function: oxidoreductase activity (GO:0016491);; Cellular Component: intrinsic component of membrane (GO:0031224);; Biological Process: single-organism metabolic process (GO:0044710);; Molecular Function: tetrapyrrole binding (GO:0046906);; Molecular Function: transition metal ion binding (GO:0046914);;	K15402|0|osa:4348947|cytochrome P450 86B1	Cutin, suberine and wax biosynthesis (ko00073)	cytochrome P450 86B1 [Oryza sativa Japonica Group]
Os12g0632900	0.0140598	-1.32276	down	Biological Process: regionalization (GO:0003002);; Molecular Function: protein kinase activity (GO:0004672);; Biological Process: cellular protein modification process (GO:0006464);; Biological Process: nitrate transport (GO:0015706);; Cellular Component: intrinsic component of membrane (GO:0031224);; Molecular Function: purine ribonucleoside binding (GO:0032550);; Molecular Function: peptide bin…	--	--	receptor protein-tyrosine kinase CEPR1 [Oryza sativa Japonica Group]
Os01g0719600	3.62e-11	-3.56918	down	--	--	--	protein SODIUM POTASSIUM ROOT DEFECTIVE 2 [Oryza sativa Japonica Group]
Os01g0223200	0.0135513	-1.6915	down	Molecular Function: hydrolase activity (GO:0016787);;	--	--	GDSL esterase/lipase At5g45910 [Oryza sativa Japonica Group]
Os03g0254200	0.0103016	-1.94218	down	Biological Process: amino acid transport (GO:0006865);; Cellular Component: intrinsic component of membrane (GO:0031224);; Cellular Component: intracellular membrane-bounded organelle (GO:0043231);;	--	--	Os03g0254200, partial [Oryza sativa Japonica Group]
Os03g0788200	0.00441103	1.52066	up	--	--	--	MD-2-related lipid-recognition protein ROSY1 [Oryza sativa Japonica Group]
xxx_newGene_11591	0.0052635	3.72215	up	--	--	--	LOW QUALITY PROTEIN: uncharacterized protein LOC112489936 [Ziziphus jujuba]
Os05g0171200	7.04e-08	5.73468	up	Cellular Component: intrinsic component of membrane (GO:0031224);;	--	--	hypothetical protein OsJ_17291 [Oryza sativa Japonica Group]
Os06g0214800	0.0452712	-1.28827	down	Molecular Function: catalytic activity (GO:0003824);;	--	--	2-hydroxyisoflavanone dehydratase [Oryza sativa Japonica Group]
Os08g0556400	0.0469778	-1.3666	down	Biological Process: organelle organization (GO:0006996);; Molecular Function: palmitoyltransferase activity (GO:0016409);; Cellular Component: intrinsic component of membrane (GO:0031224);; Molecular Function: purine ribonucleoside binding (GO:0032550);; Cellular Component: microbody (GO:0042579);; Molecular Function: transition metal ion binding (GO:0046914);;	K20027|0|osa:4346287|probable protein S-acyltransferase 19	--	hypothetical protein OsI_30227 [Oryza sativa Indica Group]
Os10g0542400	0.0133536	4.12237	up	--	--	--	expansin-like A2 isoform X1 [Oryza sativa Japonica Group]
Os10g0530500	0.000160607	-2.59025	down	--	K00799|1.00362e-117|osa:4349203|probable glutathione S-transferase GSTU6	Glutathione metabolism (ko00480)	probable glutathione S-transferase GSTU6 [Oryza sativa Japonica Group]
Os08g0178800	0.00137488	-1.97654	down	Cellular Component: cell part (GO:0044464);; Molecular Function: transition metal ion binding (GO:0046914);;	--	--	protein no-on-transient A [Oryza sativa Japonica Group]
Os03g0294200	0.0158558	-1.04564	down	Molecular Function: phosphofructokinase activity (GO:0008443);; Biological Process: phosphorylation (GO:0016310);; Biological Process: hexose metabolic process (GO:0019318);; Molecular Function: polysaccharide binding (GO:0030247);; Molecular Function: purine ribonucleoside binding (GO:0032550);;	--	--	6-phosphofructo-2-kinase/fructose-2,6-bisphosphatase isoform X3 [Oryza sativa Japonica Group]
Os07g0669250	0.00020708	2.73072	up	Cellular Component: plastid (GO:0009536);; Biological Process: plastid organization (GO:0009657);; Molecular Function: nucleoside-triphosphatase activity (GO:0017111);; Molecular Function: purine ribonucleoside binding (GO:0032550);; Molecular Function: metal ion binding (GO:0046872);;	--	--	Os07g0669250 [Oryza sativa Japonica Group]
Os07g0111700	0.000659336	-2.67075	down	--	--	--	flavin-containing monooxygenase FMO GS-OX-like 8 [Oryza sativa Japonica Group]
Os11g0648100	0.0036395	-1.11474	down	--	--	--	Kinesin motor domain containing protein, expressed [Oryza sativa Japonica Group]
Os04g0419900	2.71e-13	-3.36335	down	--	--	--	Os04g0419900, partial [Oryza sativa Japonica Group]
Os03g0804500	0.0161899	-1.58648	down	--	--	--	germin-like protein 3-7 [Oryza sativa Japonica Group]
Os09g0380000	0.017659	1.16606	up	--	--	--	acyl-activating enzyme 17-like protein [Oryza sativa Japonica Group]
Os05g0405000	0.00114464	-1.61597	down	Biological Process: starch metabolic process (GO:0005982);; Biological Process: lipid metabolic process (GO:0006629);; Biological Process: phosphate-containing compound metabolic process (GO:0006796);; Biological Process: response to radiation (GO:0009314);; Cellular Component: plastid (GO:0009536);; Molecular Function: phosphotransferase activity, paired acceptors (GO:0016781);; Molecular Functi…	K01006|0|osa:4338750|pyruvate, phosphate dikinase 1, chloroplastic isoform X1	Glycolysis / Gluconeogenesis (ko00010);; Pyruvate metabolism (ko00620);; Carbon fixation in photosynthetic organisms (ko00710);; Carbon metabolism (ko01200)	pyruvate, phosphate dikinase 1, chloroplastic [Oryza sativa Japonica Group]
Os06g0698802	0.0256956	1.96241	up	Molecular Function: purine ribonucleoside binding (GO:0032550);; Molecular Function: cation binding (GO:0043169);;	--	--	Os06g0698802, partial [Oryza sativa Japonica Group]
Os08g0117300	0.00294807	1.09449	up	--	K02953|1.65996e-102|osa:4344524|40S ribosomal protein S13-2	Ribosome (ko03010)	40S ribosomal protein S13-2 [Oryza sativa Japonica Group]
Os01g0804400	0.019666	-1.50528	down	Molecular Function: oxidoreductase activity (GO:0016491);; Cellular Component: intrinsic component of membrane (GO:0031224);; Biological Process: single-organism metabolic process (GO:0044710);; Molecular Function: tetrapyrrole binding (GO:0046906);; Molecular Function: transition metal ion binding (GO:0046914);;	--	--	cytochrome P450 94B3 [Oryza sativa Japonica Group]
Os01g0773000	0.013197	1.75824	up	Molecular Function: nucleic acid binding (GO:0003676);; Biological Process: RNA modification (GO:0009451);; Molecular Function: intramolecular transferase activity (GO:0016866);; Cellular Component: intracellular membrane-bounded organelle (GO:0043231);;	K06176|0|osa:4324714|pseudouridylate synthase 7 homolog isoform X1	--	pseudouridylate synthase 7 homolog isoform X2 [Oryza sativa Japonica Group]
Os03g0146000	0.00552579	1.72375	up	Molecular Function: purine ribonucleoside binding (GO:0032550);; Biological Process: intracellular signal transduction (GO:0035556);; Cellular Component: cell part (GO:0044464);;	K07910|2.66288e-143|osa:4331607|ras-related protein RABC2a	--	ras-related protein RABC2a [Oryza sativa Japonica Group]
Os03g0413100	1.03e-05	-2.02518	down	Molecular Function: carboxylic acid binding (GO:0031406);;	--	--	ACT domain-containing protein ACR4 [Oryza sativa Japonica Group]
Os03g0143700	0.0209953	-1.02971	down	--	--	--	uncharacterized protein LOC4331592 [Oryza sativa Japonica Group]
Os04g0412100	0.0239736	-1.91296	down	--	--	--	uncharacterized protein LOC4335778 [Oryza sativa Japonica Group]
Os07g0120650	7.89e-06	5.80866	up	--	--	--	uncharacterized protein LOC9268981 [Oryza sativa Japonica Group]
Os09g0482680	0.0304445	1.13912	up	--	K00784|0|osa:9269203|ribonuclease Z, chloroplastic	RNA transport (ko03013)	tRNase Z TRZ2, chloroplastic [Oryza sativa Japonica Group]
Os04g0679400	2.07e-08	2.94655	up	--	--	--	Os04g0679400 [Oryza sativa Japonica Group]
Os06g0573600	0.0379241	-3.26595	down	--	--	--	beta-galactosidase 9 [Oryza sativa Japonica Group]
Os04g0689500	0.0210729	-2.77797	down	Molecular Function: protein kinase activity (GO:0004672);; Biological Process: cellular protein modification process (GO:0006464);; Cellular Component: intrinsic component of membrane (GO:0031224);; Molecular Function: purine ribonucleoside binding (GO:0032550);; Cellular Component: intracellular membrane-bounded organelle (GO:0043231);;	--	--	Os04g0689500, partial [Oryza sativa Japonica Group]
Os01g0222600	5.4e-05	2.63611	up	--	--	--	uncharacterized protein LOC4326700 [Oryza sativa Japonica Group]
Os05g0550700	0.02877	3.54168	up	Molecular Function: protein kinase activity (GO:0004672);; Biological Process: cellular protein modification process (GO:0006464);; Biological Process: phosphate-containing compound metabolic process (GO:0006796);; Cellular Component: intrinsic component of membrane (GO:0031224);; Molecular Function: purine ribonucleoside binding (GO:0032550);;	--	--	Os05g0550700 [Oryza sativa Japonica Group]
Os04g0600000	0.000218217	3.41592	up	--	--	--	myb family transcription factor PHL11 isoform X1 [Oryza sativa Japonica Group]
Os09g0440300	0.000677021	3.02395	up	--	K14085|0|osa:4347172|aldehyde dehydrogenase family 7 member A1	Glycolysis / Gluconeogenesis (ko00010);; Ascorbate and aldarate metabolism (ko00053);; Fatty acid degradation (ko00071);; Glycine, serine and threonine metabolism (ko00260);; Valine, leucine and isoleucine degradation (ko00280);; Lysine degradation (ko00310);; Arginine and proline metabolism (ko00330);; Histidine metabolism (ko00340);; Tryptophan metabolism (ko00380);; beta-Alanine metabolism (ko…	aldehyde dehydrogenase family 7 member A1 [Oryza sativa Japonica Group]
Os09g0454900	0.0316517	2.7907	up	--	--	--	G-type lectin S-receptor-like serine/threonine-protein kinase At5g35370 [Oryza sativa Japonica Group]
Os01g0327400	0.0254497	3.23067	up	--	K00430|0|osa:4326970|peroxidase 1	Phenylpropanoid biosynthesis (ko00940)	peroxidase 1 [Oryza sativa Japonica Group]
Os12g0115300	0.0194897	1.38522	up	Molecular Function: binding (GO:0005488);; Biological Process: lipid localization (GO:0010876);; Biological Process: establishment of localization (GO:0051234);;	--	--	non-specific lipid-transfer protein 1 [Oryza sativa Japonica Group]
Os07g0482900	0.000207698	-3.06018	down	--	--	--	Os07g0482975 [Oryza sativa Japonica Group]
Os03g0277300	4.2e-10	8.84159	up	Molecular Function: purine ribonucleoside binding (GO:0032550);;	K03283|0|osa:4332420|heat shock cognate 70 kDa protein	Spliceosome (ko03040);; Protein processing in endoplasmic reticulum (ko04141);; Endocytosis (ko04144)	heat shock cognate 70 kDa protein [Oryza sativa Japonica Group]
Os02g0775600	0.00575569	-2.57956	down	Molecular Function: cation binding (GO:0043169);;	--	--	zinc finger protein 8 [Oryza sativa Japonica Group]
Os02g0776400	0.0191952	-1.20999	down	Molecular Function: nucleic acid binding transcription factor activity (GO:0001071);; Biological Process: transcription, DNA-templated (GO:0006351);;	K08064|8.94701e-142|osa:9270863|nuclear transcription factor Y subunit A-4 isoform X1	--	nuclear transcription factor Y subunit A-4 [Oryza sativa Japonica Group]
Os01g0855200	0.00207384	-2.16231	down	Molecular Function: antioxidant activity (GO:0016209);; Cellular Component: intracellular membrane-bounded organelle (GO:0043231);; Biological Process: cellular detoxification (GO:1990748);;	--	--	uncharacterized protein LOC4324827 [Oryza sativa Japonica Group]
Os03g0273800	0.0169075	1.97036	up	Molecular Function: catalytic activity (GO:0003824);;	K07025|0|osa:4332401|suppressor of disruption of TFIIS	--	suppressor of disruption of TFIIS [Oryza sativa Japonica Group]
Os04g0288500	0.00867	-2.04899	down	Molecular Function: protein kinase activity (GO:0004672);; Biological Process: cellular protein modification process (GO:0006464);; Cellular Component: intrinsic component of membrane (GO:0031224);; Molecular Function: purine ribonucleoside binding (GO:0032550);; Cellular Component: intracellular membrane-bounded organelle (GO:0043231);;	--	--	L-type lectin-domain containing receptor kinase IX.1 [Oryza sativa Japonica Group]
Os03g0139100	0.00691343	1.33841	up	--	--	--	Os03g0139100, partial [Oryza sativa Japonica Group]
Os01g0588200	0.0281795	1.7057	up	Molecular Function: voltage-gated ion channel activity (GO:0005244);; Biological Process: anion transport (GO:0006820);; Cellular Component: integral component of membrane (GO:0016021);; Molecular Function: wide pore channel activity (GO:0022829);; Cellular Component: mitochondrial membrane (GO:0031966);; Cellular Component: organelle outer membrane (GO:0031968);; Biological Process: regulation o…	K15040|0|osa:4327665|mitochondrial outer membrane protein porin 3	--	mitochondrial outer membrane protein porin 3 [Oryza sativa Japonica Group]
Os02g0151300	2.96e-07	-1.98059	down	Molecular Function: hydrolase activity, hydrolyzing O-glycosyl compounds (GO:0004553);; Biological Process: cellulose metabolic process (GO:0030243);; Biological Process: external encapsulating structure organization (GO:0045229);;	--	--	endoglucanase 5 [Oryza sativa Japonica Group]
Os02g0528200	0.0163484	3.21895	up	--	K00700|0|osa:4329532|1,4-alpha-glucan-branching enzyme 2, chloroplastic/amyloplastic	Starch and sucrose metabolism (ko00500)	rice starch branching enzyme [Oryza sativa Japonica Group]
Os05g0477300	0.00094642	1.62468	up	--	K02976|8.25295e-39|sbi:8076999|40S ribosomal protein S26	Ribosome (ko03010)	putative 40S ribosomal protein S26 [Oryza sativa Japonica Group]
Os08g0103900	1.64e-08	-2.8132	down	Molecular Function: nucleic acid binding (GO:0003676);; Biological Process: transcription, DNA-templated (GO:0006351);; Cellular Component: intracellular membrane-bounded organelle (GO:0043231);;	--	--	NAC domain-containing protein 105 [Oryza sativa Japonica Group]
Os06g0543200	0.0365296	-1.04383	down	Molecular Function: nucleic acid binding (GO:0003676);; Biological Process: transcription, DNA-templated (GO:0006351);; Cellular Component: intracellular membrane-bounded organelle (GO:0043231);;	--	--	uncharacterized protein LOC4341235 isoform X1 [Oryza sativa Japonica Group]
Os04g0687800	0.0284681	-1.36242	down	--	--	--	WAT1-related protein At1g68170 [Oryza sativa Japonica Group]
Os02g0178500	0.0304068	2.38954	up	--	--	--	protein CYPRO4 [Oryza sativa Japonica Group]
Os08g0557000	0.0491967	-1.26259	down	Biological Process: protein alkylation (GO:0008213);; Molecular Function: S-adenosylmethionine-dependent methyltransferase activity (GO:0008757);;	--	--	protein-L-isoaspartate O-methyltransferase 1 isoform X3 [Oryza sativa Japonica Group]
Os02g0533200	0.0376951	-1.39982	down	Cellular Component: chloroplast thylakoid (GO:0009534);; Cellular Component: chloroplast stroma (GO:0009570);;	--	--	heme-binding-like protein At3g10130, chloroplastic [Oryza sativa Japonica Group]
Os04g0423400	0.0224914	2.2232	up	--	--	--	filaggrin-2 [Oryza sativa Japonica Group]
Os02g0131100	0.017659	-1.19981	down	--	--	--	titin homolog [Oryza sativa Japonica Group]
Os04g0468600	2.13e-05	-3.61085	down	--	--	--	Os04g0468600, partial [Oryza sativa Japonica Group]
Os07g0438600	0.0421134	2.53153	up	--	--	--	subtilisin-like protease SBT5.4 [Oryza sativa Japonica Group]
Os12g0156866	5.37e-06	-1.94255	down	--	--	--	cationic amino acid transporter 6, chloroplastic [Oryza sativa Japonica Group]
Os11g0131200	0.0152963	1.35508	up	Cellular Component: plastid envelope (GO:0009526);; Cellular Component: intrinsic component of membrane (GO:0031224);;	K13347|1.95292e-139|osa:4349678|protein SYM1	Peroxisome (ko04146)	protein SYM1 [Oryza sativa Japonica Group]
Os02g0106100	2.9e-11	5.95159	up	Molecular Function: beta-fructofuranosidase activity (GO:0004564);; Cellular Component: intrinsic component of membrane (GO:0031224);; Biological Process: primary metabolic process (GO:0044238);;	K21351|0|osa:4328018|sucrose:sucrose 1-fructosyltransferase	--	sucrose:sucrose 1-fructosyltransferase [Oryza sativa Japonica Group]
Os02g0258800	0.0354116	1.49974	up	--	--	--	uncharacterized protein LOC4328929 [Oryza sativa Japonica Group]
Os04g0474700	0.00580543	-1.10889	down	--	--	--	Os04g0474700 [Oryza sativa Japonica Group]
Os04g0498000	0.00196024	2.44859	up	--	--	--	Os04g0498000, partial [Oryza sativa Japonica Group]
Os01g0585100	2.51e-05	4.36365	up	--	--	--	uncharacterized membrane protein C776.05 isoform X1 [Oryza sativa Japonica Group]
Os01g0347000	1.38e-06	-2.51761	down	--	K14165|0|osa:4326496|dual specificity protein phosphatase PHS1	--	dual specificity protein phosphatase PHS1 isoform X1 [Oryza sativa Japonica Group]
Os01g0622066	0.0117837	-1.45021	down	--	--	--	hypothetical protein EE612_004143 [Oryza sativa]
Os02g0754300	0.0266799	1.20851	up	--	K02904|1.26538e-71|osa:4330763|50S ribosomal protein L29, chloroplastic	Ribosome (ko03010)	50S ribosomal protein L29, chloroplastic [Oryza sativa Japonica Group]
Os06g0141200	0.0149582	-2.27467	down	Molecular Function: catalytic activity (GO:0003824);; Cellular Component: plastid (GO:0009536);; Molecular Function: transition metal ion binding (GO:0046914);;	--	--	uncharacterized RNA-binding protein C17H9.04c [Oryza sativa Japonica Group]
Os09g0418500	0.0379987	2.68741	up	Molecular Function: protein kinase activity (GO:0004672);; Biological Process: cellular protein modification process (GO:0006464);; Biological Process: phosphate-containing compound metabolic process (GO:0006796);; Biological Process: hyperosmotic response (GO:0006972);; Biological Process: cell communication (GO:0007154);; Biological Process: auxin polar transport (GO:0009926);; Molecular Functi…	--	--	Os09g0418500, partial [Oryza sativa Japonica Group]
Os02g0793700	0.0125481	-1.49536	down	--	K17278|3.03903e-64|osa:4330990|probable steroid-binding protein 3	--	probable steroid-binding protein 3 [Oryza sativa Japonica Group]
Os03g0697833	0.000692271	1.39242	up	--	--	--	Os03g0697833 [Oryza sativa Japonica Group]
Os06g0274500	0.00748304	-1.3485	down	--	--	--	LRR receptor kinase SERL2 [Oryza sativa Japonica Group]
Os11g0104300	2.02e-05	-2.9752	down	Biological Process: macromolecule metabolic process (GO:0043170);; Cellular Component: intracellular membrane-bounded organelle (GO:0043231);;	--	--	protein DWARF 53 [Oryza sativa Japonica Group]
Os04g0592400	0.00926597	-1.38889	down	--	--	--	WEB family protein At5g16730, chloroplastic [Oryza sativa Japonica Group]
Os03g0755100	0.0025531	-1.31921	down	Cellular Component: plasma membrane (GO:0005886);; Biological Process: transport (GO:0006810);; Biological Process: response to metal ion (GO:0010038);; Molecular Function: P-P-bond-hydrolysis-driven transmembrane transporter activity (GO:0015405);; Molecular Function: nucleoside-triphosphatase activity (GO:0017111);; Cellular Component: intrinsic component of membrane (GO:0031224);; Molecular Fu…	--	--	RecName: Full=ABC transporter B family member 25; Short=ABC transporter ABCB.25; Short=OsABCB25; AltName: Full=Protein ALS1 homolog; AltName: Full=Protein ALUMINUM SENSITIVE 1; Short=OsALS1
Os03g0838900	0.0247668	-1.57219	down	Molecular Function: DNA binding (GO:0003677);; Biological Process: transcription, DNA-templated (GO:0006351);; Cellular Component: plastid (GO:0009536);;	--	--	uncharacterized protein LOC4334719 [Oryza sativa Japonica Group]
Os01g0891300	0.0293637	-1.11341	down	Molecular Function: alcohol dehydrogenase (NAD) activity (GO:0004022);; Molecular Function: hydrolase activity, hydrolyzing O-glycosyl compounds (GO:0004553);; Biological Process: reciprocal meiotic recombination (GO:0007131);; Cellular Component: plastid (GO:0009536);; Biological Process: single-organism metabolic process (GO:0044710);; Biological Process: external encapsulating structure organi…	--	--	probable rhamnogalacturonase B [Oryza sativa Japonica Group]
Os06g0155500	2.57e-13	-3.68276	down	Molecular Function: transferase activity, transferring acyl groups (GO:0016746);;	--	--	putative elicitor inducible gene product EIG-I24 [Oryza sativa Indica Group]
Os04g0477000	0.00722849	-1.78642	down	--	--	--	BTB/POZ domain-containing protein At1g67900 [Oryza sativa Japonica Group]
Os03g0808300	5.45e-09	2.3948	up	--	--	--	remorin 4.1-like [Oryza sativa Japonica Group]
Os10g0483500	4.99e-05	-3.01932	down	--	K00279|0|osa:4348932|cytokinin dehydrogenase 3	Zeatin biosynthesis (ko00908)	cytokinin dehydrogenase 3 [Oryza sativa Japonica Group]
Os03g0859500	0.0152495	2.82483	up	--	--	--	ABC transporter G family member 3 isoform X2 [Oryza sativa Japonica Group]
Os04g0629600	0.00491792	1.69212	up	Molecular Function: nucleic acid binding (GO:0003676);; Biological Process: DNA metabolic process (GO:0006259);; Biological Process: programmed cell death (GO:0012501);; Molecular Function: purine ribonucleoside binding (GO:0032550);; Cellular Component: intracellular membrane-bounded organelle (GO:0043231);; Molecular Function: transition metal ion binding (GO:0046914);;	--	--	Os04g0629600 [Oryza sativa Japonica Group]
Os09g0513500	0.0456699	-1.16569	down	--	K16223|3.56004e-80|osa:9268282|protein FLOWERING LOCUS T	Circadian rhythm - plant (ko04712)	protein FLOWERING LOCUS T isoform X2 [Oryza sativa Japonica Group]
Os02g0681900	0.000406019	-1.1785	down	--	--	--	scarecrow-like protein 8 [Oryza sativa Japonica Group]
Os10g0320201	0.000214734	-3.19318	down	--	K05280|2.94456e-145|osa:4348304|flavonoid 3'-monooxygenase	Flavonoid biosynthesis (ko00941);; Flavone and flavonol biosynthesis (ko00944)	flavonoid 3&apos;-monooxygenase CYP75B3-like [Oryza sativa Japonica Group]
Os03g0386000	0.046809	2.81312	up	--	--	--	WD-40 repeat family protein, putative, expressed [Oryza sativa Japonica Group]
Os04g0349500	5.28e-05	1.63981	up	--	K02995|3.46139e-135|osa:4335547|40S ribosomal protein S8-like	Ribosome (ko03010)	40S ribosomal protein S8-like [Oryza sativa Japonica Group]
Os01g0105800	0.00231512	2.18905	up	--	K22063|1.60846e-76|osa:9272545|iron-sulfur assembly protein IscA-like 3, mitochondrial	--	iron-sulfur assembly protein IscA-like 3, mitochondrial [Oryza sativa Japonica Group]
Os06g0710800	0.000492289	1.53015	up	--	--	--	pentatricopeptide repeat-containing protein At5g42310, chloroplastic [Oryza sativa Japonica Group]
Os07g0190000	0.0137701	-3.05517	down	Biological Process: terpenoid metabolic process (GO:0006721);; Biological Process: thiamine metabolic process (GO:0006772);; Cellular Component: plastid (GO:0009536);; Molecular Function: transferase activity, transferring aldehyde or ketonic groups (GO:0016744);; Molecular Function: cation binding (GO:0043169);; Biological Process: 1-deoxy-D-xylulose 5-phosphate metabolic process (GO:0052863);;	K01662|0|osa:4342614|probable 1-deoxy-D-xylulose-5-phosphate synthase 2, chloroplastic	Thiamine metabolism (ko00730);; Terpenoid backbone biosynthesis (ko00900)	probable 1-deoxy-D-xylulose-5-phosphate synthase 2, chloroplastic [Oryza sativa Japonica Group]
Os05g0490100	0.00736181	2.14184	up	--	K02908|5.57268e-75|osa:4339162|60S ribosomal protein L30	Ribosome (ko03010)	60S ribosomal protein L30 [Oryza sativa Japonica Group]
Os12g0105200	0.0159226	1.19264	up	--	--	--	Os12g0105200, partial [Oryza sativa Japonica Group]
Os01g0506100	0.0455276	1.12394	up	Cellular Component: cytoplasm (GO:0005737);; Biological Process: abscisic acid-activated signaling pathway (GO:0009738);; Biological Process: seed germination (GO:0009845);; Cellular Component: intracellular membrane-bounded organelle (GO:0043231);;	--	--	pentatricopeptide repeat-containing protein At5g11310, mitochondrial [Oryza sativa Japonica Group]
Os07g0123900	0.000692271	2.0689	up	Cellular Component: membrane (GO:0016020);;	--	--	transcription factor Maf [Oryza sativa Japonica Group]
Os06g0692700	0.00260521	2.49598	up	Molecular Function: protein kinase activity (GO:0004672);; Biological Process: cellular protein modification process (GO:0006464);; Biological Process: phosphate-containing compound metabolic process (GO:0006796);; Cellular Component: intrinsic component of membrane (GO:0031224);; Molecular Function: purine ribonucleoside binding (GO:0032550);; Cellular Component: intracellular membrane-bounded o…	--	--	hypothetical protein OsJ_22461 [Oryza sativa Japonica Group]
Os09g0449600	0.00701446	1.19525	up	Biological Process: protein modification by small protein conjugation (GO:0032446);; Cellular Component: intracellular membrane-bounded organelle (GO:0043231);;	--	--	hypothetical protein OsJ_29581 [Oryza sativa Japonica Group]
Os02g0556400	0.0396321	1.07625	up	Biological Process: tRNA processing (GO:0008033);; Molecular Function: transferase activity, transferring one-carbon groups (GO:0016741);; Molecular Function: organic cyclic compound binding (GO:0097159);; Biological Process: guanosine-containing compound metabolic process (GO:1901068);;	K15430|0|osa:4329664|tRNA (guanine(10)-N2)-methyltransferase homolog	--	tRNA (guanine(10)-N2)-methyltransferase homolog [Oryza sativa Japonica Group]
Os03g0756000	0.00148431	1.31823	up	--	K02872|9.71742e-136|osa:4334154|60S ribosomal protein L13a-4	Ribosome (ko03010)	60S ribosomal protein L13a-4 [Oryza sativa Japonica Group]
Os10g0162100	3.92e-06	-3.11431	down	--	--	--	expressed protein [Oryza sativa Japonica Group]
Os08g0225000	0.0154048	1.64406	up	Biological Process: fatty acid metabolic process (GO:0006631);; Molecular Function: carbon-oxygen lyase activity (GO:0016835);; Cellular Component: intracellular part (GO:0044424);;	--	--	uncharacterized protein LOC4344973 isoform X3 [Oryza sativa Japonica Group]
Os11g0115375	0.000241978	2.78313	up	Molecular Function: binding (GO:0005488);; Biological Process: lipid localization (GO:0010876);; Molecular Function: hydrolase activity (GO:0016787);; Biological Process: protein metabolic process (GO:0019538);; Biological Process: establishment of localization (GO:0051234);;	--	--	hypothetical protein EE612_057399 [Oryza sativa]
Os03g0225200	0.00709279	2.0308	up	Biological Process: recombinational repair (GO:0000725);; Biological Process: synapsis (GO:0007129);; Cellular Component: intracellular membrane-bounded organelle (GO:0043231);;	K21777|0|osa:4332116|cyclin-SDS-like	--	cyclin-SDS-like [Oryza sativa Japonica Group]
Os06g0125500	0.00211569	-1.65309	down	Biological Process: transport (GO:0006810);; Cellular Component: intrinsic component of membrane (GO:0031224);;	--	--	unnamed protein product [Triticum turgidum subsp. durum]
Os10g0497900	0.0264567	1.19681	up	Cellular Component: intracellular membrane-bounded organelle (GO:0043231);;	--	--	lanC-like protein GCL2 isoform X1 [Oryza sativa Japonica Group]
Os07g0524900	0.00271763	-2.04858	down	--	--	--	WAT1-related protein At5g64700 [Oryza sativa Japonica Group]
Os03g0336700	0.0254346	2.04138	up	--	--	--	uncharacterized protein LOC4332766 isoform X1 [Oryza sativa Japonica Group]
Os12g0611300	0.00012744	-2.17947	down	Biological Process: cellular protein modification process (GO:0006464);; Biological Process: lipid metabolic process (GO:0006629);; Molecular Function: kinase activity (GO:0016301);; Molecular Function: purine ribonucleoside binding (GO:0032550);;	--	--	patatin-like protein 3 [Oryza sativa Japonica Group]
Os04g0167875	6.77e-10	4.72239	up	Biological Process: response to acid chemical (GO:0001101);; Molecular Function: phosphoprotein phosphatase activity (GO:0004721);; Biological Process: cellular protein modification process (GO:0006464);; Molecular Function: cation binding (GO:0043169);;	--	--	Os04g0167875 [Oryza sativa Japonica Group]
Os05g0509500	8.63e-05	5.08459	up	Molecular Function: RNA binding (GO:0003723);; Biological Process: cotranslational protein targeting to membrane (GO:0006613);; Molecular Function: nucleoside-triphosphatase activity (GO:0017111);; Molecular Function: purine ribonucleoside binding (GO:0032550);; Cellular Component: signal recognition particle (GO:0048500);;	K03106|0|osa:4339274|signal recognition particle 54 kDa protein 2	Protein export (ko03060)	signal recognition particle 54 kDa protein 2 [Oryza sativa Japonica Group]
Os01g0701900	0.0359069	2.21286	up	Cellular Component: intrinsic component of membrane (GO:0031224);; Cellular Component: intracellular membrane-bounded organelle (GO:0043231);;	--	--	putative SEC14 protein [Oryza sativa Japonica Group]
Os12g0125800	0.016892	-2.26103	down	Molecular Function: secondary active transmembrane transporter activity (GO:0015291);; Biological Process: drug transport (GO:0015893);; Cellular Component: intrinsic component of membrane (GO:0031224);;	--	--	Os11g0129000, partial [Oryza sativa Japonica Group]
Os01g0866500	0.00649187	4.33398	up	Biological Process: phosphorus metabolic process (GO:0006793);; Molecular Function: pyrophosphatase activity (GO:0016462);; Cellular Component: intracellular part (GO:0044424);; Molecular Function: metal ion binding (GO:0046872);;	K01507|2.94433e-153|osa:4325072|soluble inorganic pyrophosphatase	Oxidative phosphorylation (ko00190)	soluble inorganic pyrophosphatase [Oryza sativa Japonica Group]
Os01g0910800	5.5e-22	14.5821	up	--	--	--	protein S100-A9 [Oryza sativa Japonica Group]
Os06g0607100	0.015187	-2.05639	down	Cellular Component: intrinsic component of membrane (GO:0031224);;	--	--	phosphatidylcholine:diacylglycerol cholinephosphotransferase 1 [Oryza sativa Japonica Group]
Os04g0600200	0.0100258	3.82228	up	--	K17893|0|osa:4336874|ubiquinol oxidase 2, mitochondrial	--	ubiquinol oxidase 1a, mitochondrial [Oryza sativa Japonica Group]
Os09g0541700	0.00762127	2.56261	up	Cellular Component: plastid stroma (GO:0009532);;	--	--	uncharacterized protein LOC4347733 [Oryza sativa Japonica Group]
Os01g0705200	1.95e-14	9.60136	up	--	--	--	late embryogenesis abundant protein 14-like [Oryza sativa Japonica Group]
Os11g0210300	0.0161943	3.42731	up	Molecular Function: oxidoreductase activity, acting on the CH-OH group of donors, NAD or NADP as acceptor (GO:0016616);; Cellular Component: intracellular part (GO:0044424);; Biological Process: single-organism metabolic process (GO:0044710);; Molecular Function: transition metal ion binding (GO:0046914);;	K18857|0|osa:4350053|alcohol dehydrogenase 1	Glycolysis / Gluconeogenesis (ko00010);; Fatty acid degradation (ko00071);; Tyrosine metabolism (ko00350);; alpha-Linolenic acid metabolism (ko00592);; Pyruvate metabolism (ko00620)	alcohol dehydrogenase 1 isoform X2 [Oryza sativa Japonica Group]
Os06g0650700	0.00169271	2.8126	up	--	--	--	hypothetical protein OsI_23923 [Oryza sativa Indica Group]
Os04g0186400	0.0327368	-1.37284	down	--	K08176|0|osa:4335115|probable inorganic phosphate transporter 1-4	--	probable inorganic phosphate transporter 1-4 [Oryza sativa Japonica Group]
Os11g0546750	0.0484829	1.58133	up	Molecular Function: protein binding (GO:0005515);;	K06630|2.69203e-71|osa:4350697|14-3-3-like protein GF14-D	--	14-3-3-like protein GF14-D [Oryza sativa Japonica Group]
Os01g0964133	0.00371751	-2.34178	down	Molecular Function: structural molecule activity (GO:0005198);; Cellular Component: actin cytoskeleton (GO:0015629);; Molecular Function: nucleoside-triphosphatase activity (GO:0017111);; Molecular Function: purine ribonucleoside binding (GO:0032550);;	K10355|0|osa:9269066|actin-97	--	actin-97 [Oryza sativa Japonica Group]
Os06g0646600	0.0244436	-1.36275	down	--	--	--	homeobox protein knotted-1-like 11 isoform X1 [Oryza sativa Japonica Group]
Os12g0263000	0.0329406	-1.63142	down	Biological Process: glutathione metabolic process (GO:0006749);; Molecular Function: acid-amino acid ligase activity (GO:0016881);; Molecular Function: purine ribonucleoside binding (GO:0032550);; Molecular Function: anion binding (GO:0043168);; Cellular Component: intracellular membrane-bounded organelle (GO:0043231);; Molecular Function: metal ion binding (GO:0046872);; Molecular Function: prot…	--	--	Os12g0263000, partial [Oryza sativa Japonica Group]
Os10g0113900	0.0120631	-1.40052	down	--	--	--	Os10g0113900 [Oryza sativa Japonica Group]
Os03g0729000	1e-54	9.34657	up	--	--	--	probable zinc metalloprotease EGY3, chloroplastic isoform X2 [Oryza sativa Japonica Group]
Os07g0151800	0.00118321	2.72934	up	Cellular Component: intrinsic component of membrane (GO:0031224);; Cellular Component: intracellular membrane-bounded organelle (GO:0043231);;	--	--	uncharacterized protein LOC4342415 [Oryza sativa Japonica Group]
Os10g0390500	0.00328632	4.10957	up	Biological Process: alanine catabolic process (GO:0006524);; Molecular Function: carbon-sulfur lyase activity (GO:0016846);; Molecular Function: anion binding (GO:0043168);; Molecular Function: alanine-oxo-acid transaminase activity (GO:0047635);;	K00814|0|osa:4348524|alanine aminotransferase 2	Arginine biosynthesis (ko00220);; Alanine, aspartate and glutamate metabolism (ko00250);; Carbon fixation in photosynthetic organisms (ko00710);; Carbon metabolism (ko01200);; 2-Oxocarboxylic acid metabolism (ko01210);; Biosynthesis of amino acids (ko01230)	alanine aminotransferase 2 [Oryza sativa Japonica Group]
CAA33959	7.91e-05	3.87482	up	--	--	--	hypothetical protein OrsajCp039 (plastid) [Oryza sativa Japonica Group]
Os05g0460000	0.00112333	2.39657	up	Molecular Function: purine ribonucleoside binding (GO:0032550);;	K03283|0|osa:4339012|probable mediator of RNA polymerase II transcription subunit 37c	Spliceosome (ko03040);; Protein processing in endoplasmic reticulum (ko04141);; Endocytosis (ko04144)	probable mediator of RNA polymerase II transcription subunit 37c [Oryza sativa Japonica Group]
Os06g0559400	0.00039005	4.10731	up	--	--	--	uncharacterized protein LOC4341299 [Oryza sativa Japonica Group]
Os02g0758000	0.000726059	2.52634	up	Biological Process: response to stress (GO:0006950);; Cellular Component: intracellular membrane-bounded organelle (GO:0043231);;	K13993|6.93129e-90|osa:4330786|24.1 kDa heat shock protein, mitochondrial	Protein processing in endoplasmic reticulum (ko04141)	24.1 kDa heat shock protein, mitochondrial isoform X2 [Oryza sativa Japonica Group]
Os08g0463500	0.0117385	-1.53595	down	Cellular Component: intrinsic component of membrane (GO:0031224);; Molecular Function: cation binding (GO:0043169);;	--	--	zinc finger protein 8 [Oryza sativa Japonica Group]
xxx_newGene_6008	0.0148307	-1.603	down	--	--	--	putative beta-glucosidase 15 [Oryza sativa Japonica Group]
Os02g0668500	0.00770313	2.77295	up	--	--	--	Os02g0668500 [Oryza sativa Japonica Group]
Os06g0286375	0.0115173	-1.03479	down	--	--	--	Os06g0286375 [Oryza sativa Japonica Group]
Os07g0503200	0.001265	2.97151	up	Biological Process: flavonoid metabolic process (GO:0009812);; Molecular Function: UDP-glucosyltransferase activity (GO:0035251);;	--	--	anthocyanidin 3-O-glucosyltransferase 2 [Oryza sativa Japonica Group]
Os01g0160100	0.0102397	3.27558	up	--	K01568|0|osa:4324066|pyruvate decarboxylase 2	Glycolysis / Gluconeogenesis (ko00010)	pyruvate decarboxylase 2 [Oryza sativa Japonica Group]
Os02g0199600	9.72e-08	-1.61489	down	--	--	--	Os02g0199600 [Oryza sativa Japonica Group]
Os07g0673900	0.00161856	5.02355	up	--	--	--	Os07g0673900, partial [Oryza sativa Japonica Group]
Os05g0586050	0.00182903	2.14752	up	Cellular Component: intrinsic component of membrane (GO:0031224);;	--	--	Os05g0586050, partial [Oryza sativa Japonica Group]
Os01g0270100	0.0485083	1.50813	up	Molecular Function: endopeptidase inhibitor activity (GO:0004866);; Biological Process: response to stress (GO:0006950);; Biological Process: negative regulation of peptidase activity (GO:0010466);;	--	--	cysteine proteinase inhibitor 12 [Oryza sativa Japonica Group]
Os02g0229000	0.000554145	1.58157	up	--	K02974|3.39102e-83|osa:4328797|40S ribosomal protein S24-1	Ribosome (ko03010)	40S ribosomal protein S24-1 [Oryza sativa Japonica Group]
Os04g0509600	0.0042681	-1.24927	down	--	K03320|0|osa:4336365|ammonium transporter 1 member 1	--	ammonium transporter 1-1 [Oryza sativa]
Os06g0219400	0.0013663	2.70662	up	Cellular Component: intrinsic component of membrane (GO:0031224);; Cellular Component: intracellular membrane-bounded organelle (GO:0043231);;	--	--	Os06g0219400 [Oryza sativa Japonica Group]
Os03g0634400	0.0027685	-1.4585	down	--	--	--	CBL-interacting protein kinase 7-like [Oryza sativa Japonica Group]
CAA33994	0.0233211	-1.59413	down	Molecular Function: succinate dehydrogenase activity (GO:0000104);; Molecular Function: RNA binding (GO:0003723);; Molecular Function: structural molecule activity (GO:0005198);; Biological Process: generation of precursor metabolites and energy (GO:0006091);; Biological Process: citrate metabolic process (GO:0006101);; Cellular Component: plastid (GO:0009536);; Biological Process: gene expressio…	K02954|7.17505e-59|osa:3131436|rps14, OrsajCp023; ribosomal protein S14	Ribosome (ko03010)	ribosomal protein S14 (plastid) [Oryza sativa Japonica Group]
Os01g0511600	0.00463147	1.8797	up	Cellular Component: plastid inner membrane (GO:0009528);; Biological Process: plastid organization (GO:0009657);; Cellular Component: intrinsic component of membrane (GO:0031224);; Biological Process: carbohydrate transmembrane transport (GO:0034219);; Molecular Function: aldonate transmembrane transporter activity (GO:0042879);; Biological Process: cellular metabolic compound salvage (GO:0043094…	--	--	unnamed protein product [Oryza sativa Japonica Group]
Os02g0574500	0.021007	1.3141	up	--	--	--	Os02g0574500, partial [Oryza sativa Japonica Group]
Os11g0126100	0.0166956	-3.39414	down	Molecular Function: secondary active transmembrane transporter activity (GO:0015291);; Biological Process: drug transport (GO:0015893);; Cellular Component: intrinsic component of membrane (GO:0031224);;	K03327|0|osa:4349644|protein DETOXIFICATION 21	--	protein DETOXIFICATION 21 [Oryza sativa Japonica Group]
Os09g0274900	0.00882723	-1.73885	down	--	--	--	unknown protein [Oryza sativa Japonica Group]
Os05g0405500	0.000340974	-1.66802	down	--	--	--	Os05g0405500, partial [Oryza sativa Japonica Group]
Os02g0247200	0.0386105	1.62197	up	Molecular Function: protein binding (GO:0005515);; Cellular Component: cytoplasm (GO:0005737);; Biological Process: cellular process (GO:0009987);; Molecular Function: purine ribonucleoside binding (GO:0032550);;	K09495|0|osa:4328872|T-complex protein 1 subunit gamma	--	T-complex protein 1 subunit gamma [Oryza sativa Japonica Group]
Os03g0761200	0.00696998	2.44753	up	--	K18477|0|osa:4334192|protein arginine N-methyltransferase 2	--	protein arginine N-methyltransferase 2 [Oryza sativa Japonica Group]
Os03g0341300	0.0384011	2.09046	up	--	--	--	Os03g0341300 [Oryza sativa Japonica Group]
Os01g0949500	2.17e-06	-1.82818	down	--	K13448|1.14231e-107|osa:4325762|probable calcium-binding protein CML10	Plant-pathogen interaction (ko04626)	probable calcium-binding protein CML10 [Oryza sativa Japonica Group]
Os02g0196800	0.00868512	2.94794	up	--	K01555|0|osa:4328618|fumarylacetoacetase	Tyrosine metabolism (ko00350)	fumarylacetoacetase-like [Oryza sativa Japonica Group]
Os03g0761500	0.000208133	-2.08798	down	--	--	--	subtilisin-like protease SBT1.7 [Oryza sativa Japonica Group]
Os01g0192101	0.00768783	1.3424	up	Molecular Function: nucleic acid binding (GO:0003676);; Biological Process: hormone-mediated signaling pathway (GO:0009755);; Cellular Component: intracellular membrane-bounded organelle (GO:0043231);; Molecular Function: transition metal ion binding (GO:0046914);; Biological Process: leaf development (GO:0048366);;	--	--	zinc finger CCCH domain-containing protein 2 [Oryza sativa Japonica Group]
Os10g0389300	0.0270792	-1.03839	down	--	--	--	Os10g0389300, partial [Oryza sativa Japonica Group]
Os07g0604000	3.07e-11	1.85963	up	Cellular Component: cytoplasm (GO:0005737);; Biological Process: NADP metabolic process (GO:0006739);; Molecular Function: carboxylic ester hydrolase activity (GO:0052689);;	K01057|0|osa:4343843|probable 6-phosphogluconolactonase 2	Pentose phosphate pathway (ko00030);; Carbon metabolism (ko01200)	probable 6-phosphogluconolactonase 2 [Oryza sativa Japonica Group]
Os01g0315600	0.000498469	2.31341	up	--	--	--	Os01g0315600 [Oryza sativa Japonica Group]
Os05g0455500	6.73e-09	4.44321	up	Biological Process: proline biosynthetic process (GO:0006561);; Biological Process: phosphate-containing compound metabolic process (GO:0006796);; Molecular Function: oxidoreductase activity, acting on the aldehyde or oxo group of donors, NAD or NADP as acceptor (GO:0016620);; Molecular Function: phosphotransferase activity, carboxyl group as acceptor (GO:0016774);; Cellular Component: intrinsic …	K12657|0|osa:4338979|delta-1-pyrroline-5-carboxylate synthase	Arginine and proline metabolism (ko00330);; Biosynthesis of amino acids (ko01230)	delta-1-pyrroline-5-carboxylate synthase 1 [Oryza sativa Japonica Group]
Os08g0374100	1.83e-06	-1.96801	down	--	--	--	Os08g0374100, partial [Oryza sativa Japonica Group]
Os03g0679700	0.00171496	-1.43249	down	Biological Process: thiamine metabolic process (GO:0006772);; Cellular Component: plastid stroma (GO:0009532);; Molecular Function: ADP-sugar diphosphatase activity (GO:0019144);; Molecular Function: metal cluster binding (GO:0051540);;	K03147|0|osa:4333719|phosphomethylpyrimidine synthase, chloroplastic	Thiamine metabolism (ko00730);; Biosynthesis of cofactors (ko01240)	phosphomethylpyrimidine synthase, chloroplastic [Oryza sativa Japonica Group]
Os03g0305000	0.00111364	-1.45894	down	--	K01913|0|osa:4332592|acetate/butyrate--CoA ligase AAE7, peroxisomal	Glycolysis / Gluconeogenesis (ko00010);; Pyruvate metabolism (ko00620);; Glyoxylate and dicarboxylate metabolism (ko00630);; Butanoate metabolism (ko00650);; Carbon metabolism (ko01200)	acetate/butyrate--CoA ligase AAE7, peroxisomal [Oryza sativa Japonica Group]
Os01g0236800	0.0450549	-1.14832	down	Biological Process: polysaccharide metabolic process (GO:0005976);; Molecular Function: amylase activity (GO:0016160);; Cellular Component: intrinsic component of membrane (GO:0031224);; Cellular Component: intracellular membrane-bounded organelle (GO:0043231);;	K01177|0|osa:9268236|beta-amylase 3, chloroplastic	Starch and sucrose metabolism (ko00500)	beta-amylase 1, chloroplastic-like [Oryza sativa Japonica Group]
Os07g0475900	0.019763	1.30241	up	Biological Process: cellular protein modification process (GO:0006464);; Molecular Function: kinase activity (GO:0016301);; Molecular Function: carboxylic acid binding (GO:0031406);; Molecular Function: purine ribonucleoside binding (GO:0032550);; Cellular Component: intracellular membrane-bounded organelle (GO:0043231);;	--	--	Os07g0475900, partial [Oryza sativa Japonica Group]
Os12g0155100	0.000508347	-2.76292	down	--	--	--	protein FAF-like, chloroplastic [Oryza sativa Japonica Group]
Os01g0835700	0.00236779	-1.56133	down	--	--	--	zinc finger protein CONSTANS-LIKE 9 [Oryza sativa Japonica Group]
Os03g0682100	0.0303883	-1.56963	down	Cellular Component: intrinsic component of membrane (GO:0031224);;	--	--	nodulin family protein, putative [Oryza sativa Japonica Group]
Os12g0113500	0.00575569	4.9317	up	--	K07198|0|osa:4351307|CBL-interacting protein kinase 14	--	Os12g0113500, partial [Oryza sativa Japonica Group]
Os03g0151900	0.00842798	-1.12897	down	--	--	--	ras-related protein RABF1 [Oryza sativa Japonica Group]
Os07g0561500	0.012611	-1.59482	down	--	K00059|1.75754e-125|osa:4343598|short-chain type dehydrogenase/reductase	Fatty acid biosynthesis (ko00061);; Biotin metabolism (ko00780);; Fatty acid metabolism (ko01212);; Biosynthesis of cofactors (ko01240)	hypothetical protein OsI_26479 [Oryza sativa Indica Group]
Os07g0678300	0.0477655	1.61754	up	Molecular Function: protein kinase activity (GO:0004672);; Biological Process: cellular protein modification process (GO:0006464);; Biological Process: phosphate-containing compound metabolic process (GO:0006796);; Biological Process: cell communication (GO:0007154);; Molecular Function: purine ribonucleoside binding (GO:0032550);;	--	--	Os07g0678300, partial [Oryza sativa Japonica Group]
Os04g0119300	0.0447895	1.44595	up	Molecular Function: endopeptidase activity (GO:0004175);; Cellular Component: plastid envelope (GO:0009526);; Biological Process: protein metabolic process (GO:0019538);;	--	--	UPF0548 protein At2g17695 isoform X1 [Oryza sativa Japonica Group]
Os05g0319100	0.0485587	-1.46618	down	--	K19355|0|osa:107276043|putative mannan endo-1,4-beta-mannosidase 5	Fructose and mannose metabolism (ko00051)	putative mannan endo-1,4-beta-mannosidase 5 [Oryza sativa Japonica Group]
Os05g0537400	0.00785302	1.86308	up	Molecular Function: phosphoprotein phosphatase activity (GO:0004721);; Biological Process: cellular protein modification process (GO:0006464);; Molecular Function: cation binding (GO:0043169);;	--	--	Os05g0537400 [Oryza sativa Japonica Group]
Os02g0198700	1.31e-13	-4.28328	down	--	--	--	subtilisin-like protease SBT5.3 [Oryza sativa Japonica Group]
Os03g0279200	0.000403933	-1.41791	down	--	K11251|3.00304e-47|mus:103999812|histone H2A-like	--	Histone H2A.6 like [Actinidia chinensis var. chinensis]
Os05g0501700	0.0312809	2.0962	up	Cellular Component: intracellular membrane-bounded organelle (GO:0043231);; Biological Process: response to stimulus (GO:0050896);;	--	--	universal stress protein PHOS32 isoform X2 [Oryza sativa Japonica Group]
Os01g0644000	0.00925165	2.90687	up	Cellular Component: intrinsic component of membrane (GO:0031224);;	--	--	uncharacterized protein LOC4326569 [Oryza sativa Japonica Group]
Os05g0557900	0.000525827	5.21798	up	Molecular Function: nucleic acid binding (GO:0003676);;	--	--	uncharacterized protein LOC4339581 [Oryza sativa Japonica Group]
Os03g0375933	0.011784	-1.48469	down	--	--	--	probable polyamine transporter At3g13620 [Oryza sativa Japonica Group]
Os08g0384000	0.0440789	1.27795	up	--	K08360|3.57453e-119|osa:4345447|probable transmembrane ascorbate ferrireductase 2	--	probable transmembrane ascorbate ferrireductase 2 [Oryza sativa Japonica Group]
Os04g0116800	0.00178408	4.13882	up	Biological Process: fatty acid metabolic process (GO:0006631);; Molecular Function: transferase activity, transferring acyl groups (GO:0016746);; Cellular Component: intrinsic component of membrane (GO:0031224);; Cellular Component: intracellular membrane-bounded organelle (GO:0043231);;	--	--	OSJNBb0050O03.6 [Oryza sativa Japonica Group]
Os02g0675800	0.000156299	-1.79303	down	--	--	--	F-box protein PP2-A13 isoform X1 [Oryza sativa Japonica Group]
Os01g0306800	0.0254588	1.43903	up	Cellular Component: plastid envelope (GO:0009526);; Cellular Component: chloroplast thylakoid (GO:0009534);;	--	--	uncharacterized protein At4g37920 [Oryza sativa Japonica Group]
Os05g0455400	1.02e-07	-1.60041	down	Molecular Function: protein binding (GO:0005515);;	--	--	Os05g0455400, partial [Oryza sativa Japonica Group]
Os05g0586600	0.0335026	-1.12151	down	Molecular Function: core DNA-dependent RNA polymerase binding promoter specificity activity (GO:0000996);; Molecular Function: nucleic acid binding transcription factor activity (GO:0001071);; Molecular Function: nucleic acid binding (GO:0003676);; Biological Process: transcription, DNA-templated (GO:0006351);; Molecular Function: 5'-3' RNA polymerase activity (GO:0034062);; Cellular Component: i…	--	--	Os05g0586600, partial [Oryza sativa Japonica Group]
Os03g0115500	0.0282063	-1.34234	down	Molecular Function: oxidoreductase activity, acting on the CH-NH2 group of donors, oxygen as acceptor (GO:0016641);; Molecular Function: ribonucleotide binding (GO:0032553);; Biological Process: pyridoxal phosphate biosynthetic process (GO:0042823);; Cellular Component: intracellular membrane-bounded organelle (GO:0043231);;	K00275|4.14512e-101|osa:9271623|pyridoxine/pyridoxamine 5'-phosphate oxidase 2	Vitamin B6 metabolism (ko00750);; Biosynthesis of cofactors (ko01240)	pyridoxine/pyridoxamine 5&apos;-phosphate oxidase 2 [Oryza sativa Japonica Group]
Os08g0139000	0.017659	1.07675	up	Molecular Function: small molecule binding (GO:0036094);; Cellular Component: intracellular membrane-bounded organelle (GO:0043231);; Molecular Function: organic cyclic compound binding (GO:0097159);;	--	--	unnamed protein product [Oryza sativa Japonica Group]
Os05g0579600	0.000170466	-2.50252	down	Molecular Function: nucleic acid binding (GO:0003676);; Cellular Component: intracellular membrane-bounded organelle (GO:0043231);;	--	--	protein RADIALIS-like 3 [Oryza sativa Japonica Group]
Os02g0768300	0.000289102	-2.1267	down	--	--	--	WAT1-related protein At1g21890 [Oryza sativa Japonica Group]
Os02g0208300	0.00270329	3.77589	up	--	--	--	ABC transporter G family member 39 [Oryza sativa Japonica Group]
Os10g0525000	0.0344792	3.36214	up	Biological Process: generation of precursor metabolites and energy (GO:0006091);; Molecular Function: oxidoreductase activity (GO:0016491);; Cellular Component: intrinsic component of membrane (GO:0031224);; Cellular Component: intracellular membrane-bounded organelle (GO:0043231);; Biological Process: single-organism metabolic process (GO:0044710);; Molecular Function: tetrapyrrole binding (GO:0…	--	--	cytochrome P450 704C1 isoform X1 [Oryza sativa Japonica Group]
Os01g0266000	1.4e-05	1.58527	up	Molecular Function: nucleic acid binding (GO:0003676);; Biological Process: gene expression (GO:0010467);; Cellular Component: intracellular membrane-bounded organelle (GO:0043231);;	K18757|0|osa:4324370|la-related protein 1A isoform X1	--	la-related protein 1A isoform X1 [Oryza sativa Japonica Group]
Os03g0651900	0.0267117	-1.55341	down	--	--	--	Os03g0651900, partial [Oryza sativa Japonica Group]
Os07g0549800	0.0102581	1.19888	up	Molecular Function: small molecule binding (GO:0036094);; Cellular Component: intracellular membrane-bounded organelle (GO:0043231);; Molecular Function: organic cyclic compound binding (GO:0097159);;	--	--	organelle RRM domain-containing protein 2, mitochondrial [Oryza sativa Japonica Group]
Os02g0475400	0.0437859	-1.71814	down	--	K03453|0|osa:4329356|probable sodium/metabolite cotransporter BASS3, chloroplastic	--	probable sodium/metabolite cotransporter BASS3, chloroplastic [Oryza sativa Japonica Group]
Os02g0618250	0.00163138	1.74663	up	Biological Process: karyogamy (GO:0000741);; Molecular Function: RNA binding (GO:0003723);; Biological Process: RNA modification (GO:0009451);; Cellular Component: nuclear body (GO:0016604);; Cellular Component: viral capsid (GO:0019028);; Biological Process: ribonucleoprotein complex biogenesis (GO:0022613);; Cellular Component: intrinsic component of membrane (GO:0031224);;	K11130|1.32025e-36|osa:9269830|H/ACA ribonucleoprotein complex subunit 3-like protein	Ribosome biogenesis in eukaryotes (ko03008)	H/ACA ribonucleoprotein complex subunit 3-like protein [Oryza sativa Japonica Group]
Os03g0133500	0.0271527	1.42607	up	Molecular Function: catalytic activity (GO:0003824);;	--	--	probable acyl-activating enzyme 1, peroxisomal isoform X1 [Oryza sativa Japonica Group]
Os06g0316800	0.000720999	3.95143	up	--	--	--	glycine-rich RNA-binding protein 2 [Oryza sativa Japonica Group]
Os03g0796000	0.0340925	2.57479	up	--	--	--	hypothetical protein OsI_13890 [Oryza sativa Indica Group]
Os05g0170200	6.72e-08	7.17799	up	Cellular Component: intracellular membrane-bounded organelle (GO:0043231);; Biological Process: response to stimulus (GO:0050896);;	--	--	universal stress protein PHOS32 [Oryza sativa Japonica Group]
Os03g0184300	0.00357183	2.54794	up	Molecular Function: UDP-glycosyltransferase activity (GO:0008194);; Molecular Function: electron carrier activity (GO:0009055);; Biological Process: plant-type cell wall biogenesis (GO:0009832);; Biological Process: electron transport chain (GO:0022900);; Cellular Component: intrinsic component of membrane (GO:0031224);; Cellular Component: photosynthetic membrane (GO:0034357);; Cellular Componen…	K20890|0|osa:4331856|UDP-glucuronate:xylan alpha-glucuronosyltransferase 2 isoform X1	--	hypothetical protein EE612_015721 [Oryza sativa]
Os01g0229100	4.91e-05	1.25251	up	Biological Process: translational initiation (GO:0006413);; Molecular Function: translation factor activity, RNA binding (GO:0008135);; Cellular Component: protein complex (GO:0043234);; Cellular Component: translation preinitiation complex (GO:0070993);;	K15029|0|osa:4327193|eukaryotic translation initiation factor 3 subunit L	--	eukaryotic translation initiation factor 3 subunit L [Oryza sativa Japonica Group]
Os01g0849950	0.0250703	-1.19142	down	--	--	--	Os01g0849950, partial [Oryza sativa Japonica Group]
Os11g0100600	0.0401661	-1.16663	down	--	--	--	caffeoylshikimate esterase [Oryza sativa Japonica Group]
Os04g0569300	2.51e-05	-3.1808	down	--	--	--	OSIGBa0139P06.8 [Oryza sativa]
Os12g0571200	0.00300406	1.33577	up	--	K17777|5.2729e-60|osa:4352583|mitochondrial import inner membrane translocase subunit Tim9	--	mitochondrial import inner membrane translocase subunit Tim9 [Oryza sativa Japonica Group]
Os06g0661600	0.0384011	2.14069	up	--	K15455|1.27835e-39|osa:4341747|diphthamide biosynthesis protein 3	--	diphthamide biosynthesis protein 3 [Oryza sativa Japonica Group]
Os11g0246166	0.000189333	1.63504	up	--	--	--	F-box/kelch-repeat protein At2g44130 [Oryza sativa Japonica Group]
Os03g0268600	0.000264488	3.69831	up	Molecular Function: phosphoprotein phosphatase activity (GO:0004721);; Biological Process: cellular protein modification process (GO:0006464);; Molecular Function: cation binding (GO:0043169);; Cellular Component: intracellular membrane-bounded organelle (GO:0043231);;	K14497|0|osa:4332374|probable protein phosphatase 2C 30	MAPK signaling pathway - plant (ko04016);; Plant hormone signal transduction (ko04075)	probable protein phosphatase 2C 30 [Oryza sativa Japonica Group]
Os04g0513700	0.040548	-1.37809	down	--	--	--	Os04g0513700 [Oryza sativa Japonica Group]
Os08g0234000	0.0290608	1.23558	up	--	K02937|2.38268e-132|osa:4345009|60S ribosomal protein L7-3	Ribosome (ko03010)	hypothetical protein EE612_042936 [Oryza sativa]
Os02g0276900	7.32e-05	-1.53726	down	--	--	--	transcription factor bHLH133 isoform X1 [Oryza sativa Japonica Group]
Os02g0131050	0.0217956	-1.30828	down	--	--	--	titin homolog [Oryza sativa Japonica Group]
Os02g0785800	0.00287912	1.02201	up	--	K02917|1.58799e-74|osa:4330946|60S ribosomal protein L35a-1	Ribosome (ko03010)	60S ribosomal protein L35a-1 [Oryza sativa Japonica Group]
Os03g0663700	0.0185003	-1.60835	down	Molecular Function: catalytic activity (GO:0003824);; Biological Process: phosphatidylinositol metabolic process (GO:0046488);;	--	--	type IV inositol polyphosphate 5-phosphatase 7 isoform X6 [Oryza sativa Japonica Group]
Os06g0197550	0.00105894	1.15326	up	--	--	--	Os06g0197550 [Oryza sativa Japonica Group]
Os05g0597100	0.0343345	1.16573	up	Cellular Component: nucleus (GO:0005634);; Biological Process: transcription, DNA-templated (GO:0006351);; Molecular Function: cation binding (GO:0043169);;	--	--	hypothetical protein OsI_21251 [Oryza sativa Indica Group]
Os06g0258000	3.31e-06	2.82889	up	Molecular Function: nucleic acid binding (GO:0003676);;	K09422|2.02827e-118|osa:4340683|protein ODORANT1	--	protein ODORANT1 [Oryza sativa Japonica Group]
Os04g0673700	0.00189574	2.17431	up	--	--	--	OSJNBb0004A17.19 [Oryza sativa Japonica Group]
Os09g0555500	0.0479582	1.13324	up	Biological Process: metabolic process (GO:0008152);; Molecular Function: transferase activity (GO:0016740);; Cellular Component: intrinsic component of membrane (GO:0031224);; Cellular Component: intracellular membrane-bounded organelle (GO:0043231);;	K02291|0|osa:4347813|phytoene synthase 2, chloroplastic	Carotenoid biosynthesis (ko00906)	phytoene synthase 2, chloroplastic [Oryza sativa Japonica Group]
Os04g0676700	0.047385	1.04979	up	Molecular Function: nucleic acid binding (GO:0003676);; Biological Process: transcription, DNA-templated (GO:0006351);; Cellular Component: intracellular membrane-bounded organelle (GO:0043231);;	--	--	Os04g0676700, partial [Oryza sativa Japonica Group]
Os11g0454200	2.42e-14	11.2243	up	--	--	--	dehydrin Rab16B [Oryza sativa Japonica Group]
Os11g0659200	7.45e-18	9.92704	up	Cellular Component: intracellular membrane-bounded organelle (GO:0043231);;	--	--	uncharacterized protein LOC9266865 [Oryza sativa Japonica Group]
Os04g0382300	0.013382	1.36918	up	--	--	--	SNF1-related protein kinase regulatory subunit gamma-1 [Oryza sativa Japonica Group]
Os11g0602500	0.0348165	1.24545	up	--	--	--	Os11g0602500, partial [Oryza sativa Japonica Group]
Os01g0712700	7.29e-06	-1.98672	down	--	K01489|6.88828e-175|osa:4325937|cytidine deaminase 1	Pyrimidine metabolism (ko00240)	cytidine deaminase 1 [Oryza sativa Japonica Group]
Os05g0208550	0.00969924	2.02968	up	--	--	--	Os05g0208550, partial [Oryza sativa Japonica Group]
Os11g0704700	0.0374906	1.19407	up	Molecular Function: endopeptidase activity (GO:0004175);; Biological Process: protein metabolic process (GO:0019538);; Cellular Component: intrinsic component of membrane (GO:0031224);; Molecular Function: small molecule binding (GO:0036094);; Molecular Function: organic cyclic compound binding (GO:0097159);;	--	--	Os11g0704700, partial [Oryza sativa Japonica Group]
Os01g0723700	0.00704963	2.80971	up	Molecular Function: nucleic acid binding (GO:0003676);; Biological Process: transcription, DNA-templated (GO:0006351);; Cellular Component: intracellular membrane-bounded organelle (GO:0043231);;	--	--	B3 domain-containing protein Os03g0120900 [Oryza sativa Japonica Group]
Os11g0703900	0.00580543	1.05787	up	Molecular Function: oxidoreductase activity, acting on the CH-CH group of donors, NAD or NADP as acceptor (GO:0016628);; Molecular Function: purine ribonucleoside binding (GO:0032550);; Biological Process: single-organism metabolic process (GO:0044710);;	K03283|0|osa:4351208|heat shock cognate 70 kDa protein 2	Spliceosome (ko03040);; Protein processing in endoplasmic reticulum (ko04141);; Endocytosis (ko04144)	heat shock cognate 70 kDa protein 2 [Oryza sativa Japonica Group]
Os05g0555600	1.07e-06	2.49238	up	--	K00264|0|osa:4339561|glutamate synthase 2 [NADH], chloroplastic	Alanine, aspartate and glutamate metabolism (ko00250);; Nitrogen metabolism (ko00910);; Biosynthesis of amino acids (ko01230)	glutamate synthase 2 [NADH], chloroplastic [Oryza sativa Japonica Group]
Os07g0541400	0.0319733	-1.42257	down	--	--	--	cysteine-rich receptor-like protein kinase 6 isoform X2 [Oryza sativa Japonica Group]
Os07g0503300	0.000222	3.39978	up	Biological Process: flavonoid metabolic process (GO:0009812);; Molecular Function: UDP-glucosyltransferase activity (GO:0035251);;	--	--	anthocyanidin 3-O-glucosyltransferase 2 [Oryza sativa Japonica Group]
Os01g0121600	0.0472698	1.98836	up	Cellular Component: intrinsic component of membrane (GO:0031224);; Cellular Component: intracellular membrane-bounded organelle (GO:0043231);;	--	--	uncharacterized protein LOC4326044 [Oryza sativa Japonica Group]
Os04g0414300	0.0210351	3.5184	up	Molecular Function: small molecule binding (GO:0036094);; Cellular Component: intracellular membrane-bounded organelle (GO:0043231);; Molecular Function: organic cyclic compound binding (GO:0097159);;	--	--	Os04g0414300 [Oryza sativa Japonica Group]
Os12g0538700	0.0207691	2.29936	up	Molecular Function: disulfide oxidoreductase activity (GO:0015036);; Biological Process: cellular homeostasis (GO:0019725);; Cellular Component: intracellular part (GO:0044424);; Biological Process: single-organism metabolic process (GO:0044710);;	K03676|2.83268e-65|osa:4352426|glutaredoxin-C15	--	glutaredoxin-C15 [Oryza sativa Japonica Group]
Os01g0779300	0.0342076	2.41235	up	Molecular Function: protein kinase activity (GO:0004672);; Biological Process: cellular protein modification process (GO:0006464);; Biological Process: phosphate-containing compound metabolic process (GO:0006796);; Cellular Component: intrinsic component of membrane (GO:0031224);; Molecular Function: purine ribonucleoside binding (GO:0032550);;	--	--	L-type lectin-domain containing receptor kinase IX.1 [Oryza sativa Japonica Group]
Os07g0162300	0.0224957	1.00152	up	--	--	--	Os07g0162300 [Oryza sativa Japonica Group]
Os09g0401000	0.0118562	2.13957	up	Molecular Function: nucleic acid binding (GO:0003676);;	K09422|7.23997e-169|osa:4346997|protein ODORANT1	--	transcription factor MYB20 [Oryza sativa Japonica Group]
Os02g0719600	0.000725343	-5.49876	down	Biological Process: metabolic process (GO:0008152);; Molecular Function: transferase activity, transferring one-carbon groups (GO:0016741);;	K21485|0|osa:4330542|anthranilate O-methyltransferase 1	--	anthranilate O-methyltransferase 1 [Oryza sativa Japonica Group]
Os09g0286600	0.0219727	-1.26441	down	Molecular Function: nucleic acid binding transcription factor activity (GO:0001071);; Molecular Function: nucleic acid binding (GO:0003676);; Biological Process: transcription, DNA-templated (GO:0006351);; Cellular Component: intracellular membrane-bounded organelle (GO:0043231);;	--	--	ethylene-responsive transcription factor 1-like [Oryza sativa Japonica Group]
Os12g0514500	0.000661389	1.0105	up	Molecular Function: protein binding (GO:0005515);; Biological Process: cellular process (GO:0009987);; Molecular Function: purine ribonucleoside binding (GO:0032550);; Cellular Component: intracellular membrane-bounded organelle (GO:0043231);; Biological Process: response to stimulus (GO:0050896);;	K09487|0|osa:4352339|heat shock protein 90-6, mitochondrial	Protein processing in endoplasmic reticulum (ko04141);; Plant-pathogen interaction (ko04626)	heat shock protein 90-6, mitochondrial [Oryza sativa Japonica Group]
Os03g0351300	0.00280493	1.96121	up	Biological Process: polysaccharide metabolic process (GO:0005976);; Molecular Function: amylase activity (GO:0016160);; Cellular Component: intracellular membrane-bounded organelle (GO:0043231);;	--	--	inactive beta-amylase 9 [Oryza sativa Japonica Group]
Os01g0375200	0.0235332	2.11853	up	--	K13832|0|osa:4325444|bifunctional 3-dehydroquinate dehydratase/shikimate dehydrogenase, chloroplastic	Phenylalanine, tyrosine and tryptophan biosynthesis (ko00400);; Biosynthesis of amino acids (ko01230)	Os01g0375200, partial [Oryza sativa Japonica Group]
Os11g0199200	0.0282049	2.05664	up	--	K09580|0|osa:4350002|protein disulfide isomerase-like 1-1	Protein processing in endoplasmic reticulum (ko04141)	protein disulfide isomerase-like 1-1 [Oryza sativa Japonica Group]
Os05g0520300	0.0449104	2.24951	up	--	--	--	GATA transcription factor 12 [Oryza sativa Japonica Group]
Os04g0629500	0.0201267	1.53969	up	--	K03671|9.45534e-75|osa:4337091|thioredoxin-like protein CXXS1	--	thioredoxin-like protein CXXS1 [Oryza sativa Japonica Group]
Os12g0406100	0.0356496	1.91714	up	Molecular Function: structural molecule activity (GO:0005198);; Biological Process: gene expression (GO:0010467);; Molecular Function: hydrolase activity, acting on glycosyl bonds (GO:0016798);; Cellular Component: intracellular ribonucleoprotein complex (GO:0030529);; Cellular Component: intrinsic component of membrane (GO:0031224);; Cellular Component: intracellular membrane-bounded organelle (…	--	--	hypothetical protein OsJ_35850 [Oryza sativa Japonica Group]
Os05g0105000	0.00248632	-1.49054	down	Cellular Component: cytoplasm (GO:0005737);; Biological Process: sulfur compound metabolic process (GO:0006790);; Molecular Function: S-adenosylmethionine-dependent methyltransferase activity (GO:0008757);; Molecular Function: endoribonuclease activity, producing 5'-phosphomonoesters (GO:0016891);; Molecular Function: anion binding (GO:0043168);; Biological Process: RNA phosphodiester bond hydrol…	--	--	methionine S-methyltransferase isoform X2 [Oryza sativa Japonica Group]
Os05g0267800	0.00497529	1.89457	up	--	--	--	phosphatidylinositol transfer protein 3 [Oryza sativa Japonica Group]
Os02g0697400	0.00021042	-2.47425	down	--	K01904|0|osa:4330407|probable 4-coumarate--CoA ligase 2	Ubiquinone and other terpenoid-quinone biosynthesis (ko00130);; Phenylpropanoid biosynthesis (ko00940)	probable 4-coumarate--CoA ligase 2 [Oryza sativa Japonica Group]
Os08g0118100	0.00230277	2.94333	up	Molecular Function: carboxylic acid binding (GO:0031406);;	--	--	ACT domain-containing protein ACR8 [Oryza sativa Japonica Group]
Os01g0888600	0.000292931	-1.51894	down	--	K08472|0|osa:4324900|MLO-like protein 1	--	MLO-like protein 1 [Oryza sativa Japonica Group]
Os02g0652100	2.5e-07	3.85475	up	Molecular Function: nucleic acid binding transcription factor activity (GO:0001071);; Molecular Function: DNA binding (GO:0003677);; Biological Process: transcription, DNA-templated (GO:0006351);;	--	--	probable WRKY transcription factor 12 [Oryza sativa Japonica Group]
Os02g0655800	0.0412099	-1.61118	down	Biological Process: cellular protein modification process (GO:0006464);; Molecular Function: kinase activity (GO:0016301);; Cellular Component: intrinsic component of membrane (GO:0031224);; Molecular Function: purine ribonucleoside binding (GO:0032550);; Cellular Component: intracellular membrane-bounded organelle (GO:0043231);;	--	--	putative kinase-like protein TMKL1 [Oryza sativa Japonica Group]
Os09g0468300	0.0275705	3.34763	up	Cellular Component: intrinsic component of membrane (GO:0031224);; Molecular Function: transition metal ion binding (GO:0046914);;	--	--	hypothetical protein OsI_31707 [Oryza sativa Indica Group]
Os01g0266800	0.0116331	-1.21933	down	Cellular Component: intrinsic component of membrane (GO:0031224);;	K23678|0|osa:4324377|uncharacterized protein LOC4324377	--	uncharacterized protein LOC4324377 isoform X1 [Oryza sativa Japonica Group]
Os07g0543100	2.02e-05	-2.66521	down	Biological Process: polysaccharide metabolic process (GO:0005976);; Molecular Function: amylase activity (GO:0016160);; Cellular Component: intracellular membrane-bounded organelle (GO:0043231);;	--	--	Os07g0543100 [Oryza sativa Japonica Group]
Os10g0503200	0.0378804	-1.21938	down	Biological Process: folic acid-containing compound biosynthetic process (GO:0009396);; Molecular Function: acid-amino acid ligase activity (GO:0016881);; Molecular Function: purine ribonucleoside binding (GO:0032550);; Cellular Component: intracellular membrane-bounded organelle (GO:0043231);;	--	--	unnamed protein product [Oryza sativa Japonica Group]
Os05g0220500	0.019666	-1.61056	down	--	--	--	uncharacterized protein LOC4338127 [Oryza sativa Japonica Group]
Os08g0562866	0.00810344	-1.3892	down	Molecular Function: secondary active transmembrane transporter activity (GO:0015291);; Biological Process: drug transport (GO:0015893);; Biological Process: protein metabolic process (GO:0019538);; Cellular Component: intrinsic component of membrane (GO:0031224);; Molecular Function: transition metal ion binding (GO:0046914);; Molecular Function: peptidase activity, acting on L-amino acid peptide…	--	--	putative ripening regulated protein DDTFR18 [Oryza sativa Japonica Group]
Os11g0704000	0.0392531	2.48086	up	Cellular Component: intrinsic component of membrane (GO:0031224);;	--	--	selenoprotein H [Oryza sativa Japonica Group]
Os04g0549700	0.0125481	-1.79861	down	Molecular Function: nucleic acid binding transcription factor activity (GO:0001071);; Molecular Function: nucleic acid binding (GO:0003676);; Biological Process: transcription, DNA-templated (GO:0006351);; Cellular Component: intracellular membrane-bounded organelle (GO:0043231);;	--	--	ethylene-responsive transcription factor ERF038 [Oryza sativa Japonica Group]
Os06g0700700	0.00537751	4.07926	up	--	K01534|0|osa:4341965|cadmium/zinc-transporting ATPase HMA3	--	cadmium/zinc-transporting ATPase HMA2 [Oryza sativa Japonica Group]
Os06g0318700	0.00557606	4.7925	up	--	K15687|0|osa:4340884|E3 ubiquitin-protein ligase makorin	--	E3 ubiquitin-protein ligase makorin [Oryza sativa Japonica Group]
Os01g0696100	0.0121841	-1.52123	down	--	K05389|0|osa:4325287|two-pore potassium channel 2	--	two-pore potassium channel 2 [Oryza sativa Japonica Group]
Os03g0206700	0.00748304	-2.13831	down	--	--	--	BTB/POZ domain-containing protein SR1IP1 isoform X1 [Oryza sativa Japonica Group]
Os01g0901900	0.00578262	1.66062	up	Cellular Component: cytoplasmic chromosome (GO:0000229);; Cellular Component: plastid stroma (GO:0009532);; Molecular Function: organic cyclic compound binding (GO:0097159);;	--	--	unknown protein [Oryza sativa Japonica Group]
Os08g0506700	0.040547	-1.22649	down	--	--	--	transcription factor bHLH130 [Oryza sativa Japonica Group]
Os02g0678200	0.00570343	-1.51777	down	Biological Process: transport (GO:0006810);; Cellular Component: intrinsic component of membrane (GO:0031224);;	--	--	SPX domain-containing membrane protein Os02g45520 isoform X2 [Oryza sativa Japonica Group]
Os07g0633200	0.0023456	2.50653	up	Molecular Function: small molecule binding (GO:0036094);; Cellular Component: intracellular membrane-bounded organelle (GO:0043231);; Molecular Function: organic cyclic compound binding (GO:0097159);;	K12900|2.38923e-47|osa:4344009|serine/arginine-rich SC35-like splicing factor SCL33 isoform X1	Spliceosome (ko03040)	hypothetical protein OsI_26989 [Oryza sativa Indica Group]
Os10g0579850	0.00393585	-1.62956	down	Cellular Component: intrinsic component of membrane (GO:0031224);; Biological Process: establishment of localization (GO:0051234);;	--	--	protein NRT1/ PTR FAMILY 8.3 [Oryza sativa Japonica Group]
Os05g0550300	1.75e-11	7.28453	up	--	--	--	non-specific lipid-transfer protein 2 [Oryza sativa Japonica Group]
Os04g0420600	0.0271603	-1.77724	down	--	--	--	Os04g0420600 [Oryza sativa Japonica Group]
Os08g0434700	0.0186724	-1.46937	down	Molecular Function: nucleic acid binding (GO:0003676);; Biological Process: transcription, DNA-templated (GO:0006351);; Cellular Component: intracellular membrane-bounded organelle (GO:0043231);;	--	--	Os08g0434700, partial [Oryza sativa Japonica Group]
Os01g0551100	0.00473682	-1.76687	down	--	--	--	ribonuclease 3-like protein 1 [Oryza sativa Japonica Group]
Os03g0273200	4.69e-12	5.53758	up	--	K05909|0|osa:4332400|laccase-10	--	laccase-10 [Oryza sativa Japonica Group]
Os01g0275500	0.0120862	2.96244	up	Biological Process: gene silencing (GO:0016458);; Cellular Component: intracellular membrane-bounded organelle (GO:0043231);; Molecular Function: organic cyclic compound binding (GO:0097159);;	--	--	Os01g0275500 [Oryza sativa Japonica Group]
Os11g0182200	0.0271923	1.82081	up	Molecular Function: transferase activity, transferring acyl groups (GO:0016746);;	--	--	hydroxycinnamoyltransferase 4-like [Oryza sativa Japonica Group]
Os12g0121300	0.0109126	1.54391	up	Biological Process: metabolic process (GO:0008152);; Molecular Function: transferase activity, transferring phosphorus-containing groups (GO:0016772);; Cellular Component: intrinsic component of membrane (GO:0031224);;	K00967|0|osa:4351359|ethanolamine-phosphate cytidylyltransferase	Phosphonate and phosphinate metabolism (ko00440);; Glycerophospholipid metabolism (ko00564)	uncharacterized protein LOC4351359 isoform X2 [Oryza sativa Japonica Group]
Os12g0182500	1.7e-09	5.29056	up	--	--	--	uncharacterized protein LOC4351680 [Oryza sativa Japonica Group]
Os07g0188700	2.14e-09	10.3827	up	Molecular Function: catalytic activity (GO:0003824);; Cellular Component: intrinsic component of membrane (GO:0031224);;	--	--	probable glycosyltransferase At5g03795 [Oryza sativa Japonica Group]
Os03g0388100	0.0148712	-1.53097	down	Biological Process: cation transport (GO:0006812);; Molecular Function: cation binding (GO:0043169);;	--	--	hypothetical protein OsI_11856 [Oryza sativa Indica Group]
Os01g0863300	0.0472283	3.64526	up	Molecular Function: nucleic acid binding (GO:0003676);; Biological Process: transcription, DNA-templated (GO:0006351);; Cellular Component: intracellular membrane-bounded organelle (GO:0043231);;	--	--	Os01g0863300 [Oryza sativa Japonica Group]
Os03g0292700	1.77e-20	-3.66796	down	Molecular Function: protein kinase activity (GO:0004672);; Biological Process: cellular protein modification process (GO:0006464);; Biological Process: phosphate-containing compound metabolic process (GO:0006796);; Cellular Component: intrinsic component of membrane (GO:0031224);; Molecular Function: purine ribonucleoside binding (GO:0032550);;	--	--	mitogen-activated protein kinase kinase kinase ANP1, partial [Oryza sativa Japonica Group]
xxx_newGene_10211	0.00214568	3.29782	up	Molecular Function: electron carrier activity (GO:0009055);; Biological Process: proton transport (GO:0015992);; Cellular Component: intracellular membrane-bounded organelle (GO:0043231);;	K02267|2.81599e-51|osa:4343941|cytochrome c oxidase subunit 6b-1	Oxidative phosphorylation (ko00190)	cytochrome c oxidase subunit 6b-1 [Oryza sativa Japonica Group]
Os07g0111900	0.000150947	-3.09555	down	--	--	--	flavin-containing monooxygenase FMO GS-OX-like 8 [Oryza sativa Japonica Group]
Os08g0110100	0.0427259	1.94823	up	--	K02907|1.35182e-48|osa:4344476|uncharacterized protein LOC4344476	Ribosome (ko03010)	hypothetical protein OsI_27554 [Oryza sativa Indica Group]
Os01g0741900	0.000503334	2.33953	up	Molecular Function: protein binding (GO:0005515);; Biological Process: transcription, DNA-templated (GO:0006351);; Biological Process: translation (GO:0006412);; Biological Process: hormone-mediated signaling pathway (GO:0009755);; Cellular Component: intracellular membrane-bounded organelle (GO:0043231);;	K14484|0|osa:4326541|auxin-responsive protein IAA6 isoform X2	Plant hormone signal transduction (ko04075)	auxin-responsive protein IAA6 isoform X2 [Oryza sativa Japonica Group]
Os01g0223000	0.0203972	-1.56282	down	Molecular Function: hydrolase activity (GO:0016787);;	--	--	Os01g0223000, partial [Oryza sativa Japonica Group]
Os01g0350300	2.48e-08	4.90774	up	Molecular Function: purine ribonucleoside binding (GO:0032550);;	--	--	hypothetical protein OsI_01827 [Oryza sativa Indica Group]
Os03g0342900	0.0087301	1.01671	up	--	--	--	Os03g0342900 [Oryza sativa Japonica Group]
Os11g0139700	0.0498911	2.91989	up	--	--	--	Os11g0139700 [Oryza sativa Japonica Group]
Os03g0843300	0.0120054	2.3011	up	Cellular Component: cytoplasm (GO:0005737);; Cellular Component: cell-cell junction (GO:0005911);; Biological Process: response to water deprivation (GO:0009414);; Biological Process: response to hormone (GO:0009725);; Cellular Component: membrane (GO:0016020);; Cellular Component: intracellular membrane-bounded organelle (GO:0043231);;	--	--	hypothetical protein OsJ_13328 [Oryza sativa Japonica Group]
Os07g0205000	0.00612749	2.05735	up	--	--	--	uncharacterized protein LOC4342681 [Oryza sativa Japonica Group]
Os07g0209100	5.08e-05	4.51877	up	Molecular Function: galactosyltransferase activity (GO:0008378);;	K06617|0|osa:4342703|probable galactinol--sucrose galactosyltransferase 2 isoform X1	Galactose metabolism (ko00052)	probable galactinol--sucrose galactosyltransferase 2 isoform X1 [Oryza sativa Japonica Group]
Os06g0326400	0.00023273	1.51102	up	--	K00895|0|osa:4340909|pyrophosphate--fructose 6-phosphate 1-phosphotransferase subunit alpha	Glycolysis / Gluconeogenesis (ko00010);; Pentose phosphate pathway (ko00030);; Fructose and mannose metabolism (ko00051)	pyrophosphate--fructose 6-phosphate 1-phosphotransferase subunit alpha [Oryza sativa Japonica Group]
Os06g0601500	2.13e-07	-2.94954	down	Molecular Function: nucleic acid binding transcription factor activity (GO:0001071);; Molecular Function: DNA binding (GO:0003677);; Biological Process: transcription, DNA-templated (GO:0006351);; Cellular Component: intracellular membrane-bounded organelle (GO:0043231);;	--	--	Os06g0601500, partial [Oryza sativa Japonica Group]
Os06g0493100	0.0438362	-1.89643	down	--	--	--	brown planthopper-inducible protein-like [Oryza sativa Japonica Group]
Os03g0268900	0.0408161	1.74685	up	Molecular Function: catalytic activity (GO:0003824);; Cellular Component: cytoplasm (GO:0005737);; Cellular Component: intrinsic component of membrane (GO:0031224);; Biological Process: single-organism metabolic process (GO:0044710);;	K08081|1.33992e-171|osa:4332375|tropinone reductase homolog At5g06060	Tropane, piperidine and pyridine alkaloid biosynthesis (ko00960)	tropinone reductase homolog At5g06060 [Oryza sativa Japonica Group]
Os12g0601800	0.0114904	-1.77314	down	Molecular Function: nucleic acid binding transcription factor activity (GO:0001071);; Molecular Function: DNA binding (GO:0003677);; Biological Process: transcription, DNA-templated (GO:0006351);;	--	--	light-inducible protein CPRF2 isoform X3 [Oryza sativa Japonica Group]
Os04g0556550	0.0358148	-2.5542	down	--	K13495|0|osa:4336630|cis-zeatin O-glucosyltransferase 1	Zeatin biosynthesis (ko00908)	cis-zeatin O-glucosyltransferase 1 [Oryza sativa Japonica Group]
Os09g0424300	0.00816967	2.23269	up	--	--	--	S-adenosylmethionine decarboxylase proenzyme [Oryza sativa Japonica Group]
Os03g0793800	0.0438553	1.43653	up	Molecular Function: hydrolase activity (GO:0016787);; Biological Process: protein metabolic process (GO:0019538);;	--	--	non-specific lipid transfer protein GPI-anchored 2 [Oryza sativa Japonica Group]
Os07g0208000	4.96e-05	1.37682	up	Molecular Function: structural molecule activity (GO:0005198);; Biological Process: gene expression (GO:0010467);; Cellular Component: intracellular ribonucleoprotein complex (GO:0030529);;	K02957|2.92474e-88|osa:4342697|40S ribosomal protein S15a-1	Ribosome (ko03010)	PREDICTED: 40S ribosomal protein S15a-1-like [Oryza brachyantha]
Os08g0408500	0.00576252	1.5744	up	Molecular Function: nucleic acid binding transcription factor activity (GO:0001071);; Molecular Function: nucleic acid binding (GO:0003676);; Biological Process: transcription, DNA-templated (GO:0006351);; Cellular Component: intracellular membrane-bounded organelle (GO:0043231);;	K09286|2.44063e-128|osa:4345541|ethylene-responsive transcription factor RAP2-4	--	ethylene-responsive transcription factor RAP2-4 [Oryza sativa Japonica Group]
Os07g0679700	0.00207255	-1.05477	down	Molecular Function: nucleic acid binding (GO:0003676);; Biological Process: transcription, DNA-templated (GO:0006351);; Cellular Component: intracellular membrane-bounded organelle (GO:0043231);; Molecular Function: transition metal ion binding (GO:0046914);;	--	--	B3 domain-containing protein Os07g0679700 isoform X1 [Oryza sativa Japonica Group]
Os01g0592500	7.86e-08	6.73327	up	Cellular Component: intrinsic component of membrane (GO:0031224);;	--	--	hypothetical protein OsI_02654 [Oryza sativa Indica Group]
Os07g0694300	0.0160725	-1.06979	down	--	K00430|0|osa:4344393|peroxidase 21	Phenylpropanoid biosynthesis (ko00940)	putative peroxidase [Oryza sativa Japonica Group]
Os07g0118300	0.00735731	3.28969	up	Cellular Component: intrinsic component of membrane (GO:0031224);; Cellular Component: vacuolar part (GO:0044437);;	--	--	uncharacterized protein LOC4342264 [Oryza sativa Japonica Group]
xxx_newGene_6044	0.0130198	2.17641	up	--	--	--	unknown protein [Oryza sativa Japonica Group]
Os05g0575000	0.00597888	3.61475	up	--	--	--	Os05g0575000, partial [Oryza sativa Japonica Group]
Os03g0666850	0.000999608	1.59729	up	Cellular Component: intrinsic component of membrane (GO:0031224);;	--	--	hypothetical protein OsJ_00623 [Oryza sativa Japonica Group]
Os11g0137200	0.000493882	-1.41269	down	Molecular Function: catalytic activity (GO:0003824);;	K01640|0|osa:4349718|hydroxymethylglutaryl-CoA lyase, mitochondrial	Synthesis and degradation of ketone bodies (ko00072);; Valine, leucine and isoleucine degradation (ko00280);; Butanoate metabolism (ko00650);; Peroxisome (ko04146)	hydroxymethylglutaryl-CoA lyase, mitochondrial [Oryza sativa Japonica Group]
Os08g0113000	0.0133588	-2.23973	down	Molecular Function: catalytic activity (GO:0003824);; Biological Process: response to stress (GO:0006950);; Molecular Function: antioxidant activity (GO:0016209);; Biological Process: hydrogen peroxide metabolic process (GO:0042743);; Molecular Function: cation binding (GO:0043169);; Biological Process: single-organism metabolic process (GO:0044710);; Molecular Function: tetrapyrrole binding (GO:…	K00430|0|osa:4344496|peroxidase 47	Phenylpropanoid biosynthesis (ko00940)	TPA: class III peroxidase 117 precursor [Oryza sativa Japonica Group]
Os03g0429800	0.0315519	2.04579	up	--	K00106|0|osa:4333171|xanthine dehydrogenase isoform X1	Purine metabolism (ko00230);; Caffeine metabolism (ko00232);; Peroxisome (ko04146)	xanthine dehydrogenase isoform X1 [Oryza sativa Japonica Group]
Os10g0530400	0.0387294	-1.25294	down	--	K00799|1.39785e-143|osa:4349202|probable glutathione S-transferase GSTU6	Glutathione metabolism (ko00480)	probable glutathione S-transferase GSTU6 [Oryza sativa Japonica Group]
Os01g0846450	0.000498419	1.6058	up	Cellular Component: intrinsic component of membrane (GO:0031224);;	--	--	hypothetical protein OsI_04417 [Oryza sativa Indica Group]
Os06g0154400	0.000588187	1.61514	up	Cellular Component: intracellular membrane-bounded organelle (GO:0043231);;	--	--	Os06g0154400, partial [Oryza sativa Japonica Group]
Os03g0605300	0.017659	-1.75361	down	Molecular Function: endopeptidase activity (GO:0004175);; Biological Process: protein metabolic process (GO:0019538);;	--	--	subtilisin-like protease SBT1.7 [Oryza sativa Japonica Group]
Os06g0595900	0.0361425	1.84005	up	Biological Process: gene expression (GO:0010467);;	--	--	Os06g0595900, partial [Oryza sativa Japonica Group]
Os06g0187500	0.000607343	-3.02773	down	--	--	--	hypothetical protein EE612_032372 [Oryza sativa]
Os09g0437500	0.000635371	2.08526	up	--	--	--	dormancy-associated protein homolog 3 [Oryza sativa Japonica Group]
Os01g0133500	0.0246117	1.78688	up	Cellular Component: intracellular membrane-bounded organelle (GO:0043231);;	--	--	uncharacterized protein LOC4325805 isoform X1 [Oryza sativa Japonica Group]
Os08g0546400	0.00387356	2.88346	up	--	--	--	plant UBX domain-containing protein 8 isoform X1 [Oryza sativa Japonica Group]
Os03g0701200	0.0395631	2.6372	up	Molecular Function: catalytic activity (GO:0003824);;	K07025|0|osa:4333827|uncharacterized protein LOC4333827	--	uncharacterized protein LOC4333827 [Oryza sativa Japonica Group]
Os01g0143800	0.000414275	1.99181	up	Cellular Component: mitochondrial part (GO:0044429);;	K15414|1.73702e-139|osa:4325462|uncharacterized protein At2g39795, mitochondrial	--	uncharacterized protein At2g39795, mitochondrial [Oryza sativa Japonica Group]
Os07g0152800	0.000101492	2.75809	up	Biological Process: protein targeting to peroxisome (GO:0006625);; Biological Process: fatty acid catabolic process (GO:0009062);; Cellular Component: peroxisomal part (GO:0044439);;	--	--	hypothetical protein EE612_037194, partial [Oryza sativa]
Os08g0403300	0.00912767	2.0617	up	--	--	--	heavy metal-associated isoprenylated plant protein 23 [Oryza sativa Japonica Group]
CAA34011	0.0011795	-1.54322	down	Cellular Component: photosystem II (GO:0009523);; Cellular Component: chloroplast thylakoid (GO:0009534);; Cellular Component: intrinsic component of membrane (GO:0031224);; Biological Process: cellular metabolic process (GO:0044237);;	K02710|5.06688e-17|osa:3131416|psbI, OrsajCp006; photosystem II protein I	Photosynthesis (ko00195)	PsbI (chloroplast) [Phyllorachis sagittata]
Os12g0626400	7.07e-07	-2.15096	down	Biological Process: metabolic process (GO:0008152);; Molecular Function: transferase activity (GO:0016740);; Cellular Component: intrinsic component of membrane (GO:0031224);; Cellular Component: intracellular membrane-bounded organelle (GO:0043231);;	K02291|0|osa:4352846|phytoene synthase 2, chloroplastic	Carotenoid biosynthesis (ko00906)	phytoene synthase 2, chloroplastic [Oryza sativa Japonica Group]
Os05g0424100	0.000594653	-1.89554	down	--	--	--	amino acid permease 3 isoform X2 [Oryza sativa Japonica Group]
Os08g0562800	0.00158837	-1.60751	down	Molecular Function: secondary active transmembrane transporter activity (GO:0015291);; Biological Process: drug transport (GO:0015893);; Biological Process: protein metabolic process (GO:0019538);; Cellular Component: intrinsic component of membrane (GO:0031224);; Molecular Function: transition metal ion binding (GO:0046914);; Molecular Function: peptidase activity, acting on L-amino acid peptide…	--	--	putative ripening regulated protein DDTFR18 [Oryza sativa Japonica Group]
Os02g0208500	0.0479451	-2.09738	down	--	--	--	hypothetical protein OsJ_05841 [Oryza sativa Japonica Group]
Os02g0284600	0.000858048	1.47987	up	--	K02901|1.28797e-82|osa:4329034|60S ribosomal protein L27-3	Ribosome (ko03010)	unnamed protein product [Triticum turgidum subsp. durum]
Os09g0128400	3.12e-06	2.18124	up	--	--	--	hypothetical protein OsI_30449 [Oryza sativa Indica Group]
Os12g0291400	0.0385875	-1.85524	down	Cellular Component: chloroplast (GO:0009507);; Biological Process: carbon fixation (GO:0015977);; Molecular Function: oxidoreductase activity (GO:0016491);; Molecular Function: carboxy-lyase activity (GO:0016831);; Biological Process: cellular metabolic compound salvage (GO:0043094);;	K01602|5.78688e-125|osa:4352016|ribulose bisphosphate carboxylase small chain A, chloroplastic-like	Glyoxylate and dicarboxylate metabolism (ko00630);; Carbon fixation in photosynthetic organisms (ko00710);; Carbon metabolism (ko01200)	ribulose bisphosphate carboxylase small chain A, chloroplastic-like [Oryza sativa Japonica Group]
Os08g0130500	0.00601961	1.38167	up	--	K02941|0|osa:4344590|60S acidic ribosomal protein P0	Ribosome (ko03010)	60S acidic ribosomal protein P0 [Oryza sativa Japonica Group]
Os01g0667900	0.0247195	1.80864	up	Molecular Function: disulfide oxidoreductase activity (GO:0015036);; Biological Process: cellular homeostasis (GO:0019725);; Molecular Function: cation binding (GO:0043169);; Cellular Component: intracellular membrane-bounded organelle (GO:0043231);; Biological Process: single-organism metabolic process (GO:0044710);; Molecular Function: iron-sulfur cluster binding (GO:0051536);;	--	--	monothiol glutaredoxin-S5 [Oryza sativa Japonica Group]
Os01g0609200	0.00253977	5.35119	up	--	--	--	ABC transporter G family member 35 [Oryza sativa Japonica Group]
Os04g0162500	0.0358148	-1.24346	down	--	--	--	Os04g0162500, partial [Oryza sativa Japonica Group]
Os10g0189600	0.0351625	2.64142	up	Biological Process: membrane lipid metabolic process (GO:0006643);; Biological Process: programmed cell death (GO:0012501);; Molecular Function: C-palmitoyltransferase activity (GO:0016454);; Cellular Component: intrinsic component of membrane (GO:0031224);; Biological Process: growth (GO:0040007);; Molecular Function: anion binding (GO:0043168);; Cellular Component: intracellular membrane-bounde…	K00654|0|osa:4348231|long chain base biosynthesis protein 1c	Sphingolipid metabolism (ko00600)	long chain base biosynthesis protein 1c [Oryza sativa Japonica Group]
Os06g0625500	0.0247668	1.59582	up	Molecular Function: catalytic activity (GO:0003824);; Cellular Component: plastid stroma (GO:0009532);; Molecular Function: antioxidant activity (GO:0016209);; Biological Process: single-organism metabolic process (GO:0044710);; Biological Process: cellular detoxification (GO:1990748);;	--	--	peroxiredoxin-2E-1, chloroplastic [Oryza sativa Japonica Group]
Os06g0553100	1.84e-11	4.97804	up	Molecular Function: nucleic acid binding transcription factor activity (GO:0001071);; Molecular Function: DNA binding (GO:0003677);; Biological Process: transcription, DNA-templated (GO:0006351);; Cellular Component: intracellular membrane-bounded organelle (GO:0043231);;	--	--	Os06g0553100 [Oryza sativa Japonica Group]
Os03g0348900	0.000891649	3.21538	up	Biological Process: negative regulation of response to biotic stimulus (GO:0002832);; Molecular Function: protein binding (GO:0005515);; Molecular Function: ubiquitin-like protein transferase activity (GO:0019787);; Biological Process: positive regulation of proteasomal ubiquitin-dependent protein catabolic process (GO:0032436);; Biological Process: protein modification by small protein conjugati…	K10144|2.84594e-126|osa:4332833|E3 ubiquitin-protein ligase MIEL1	Ubiquitin mediated proteolysis (ko04120)	E3 ubiquitin-protein ligase SRFP1-like [Oryza sativa Japonica Group]
Os11g0132600	0.00448094	1.49033	up	Molecular Function: hydrolase activity, hydrolyzing O-glycosyl compounds (GO:0004553);; Biological Process: arabinose metabolic process (GO:0019566);;	K01209|0|osa:4349687|alpha-L-arabinofuranosidase 1	Amino sugar and nucleotide sugar metabolism (ko00520)	alpha-L-arabinofuranosidase 1 [Oryza sativa Japonica Group]
Os03g0140700	1.08e-09	-2.39917	down	--	--	--	uncharacterized protein LOC4331573 [Oryza sativa Japonica Group]
Os04g0605300	0.000525124	-1.66489	down	--	--	--	plant intracellular Ras-group-related LRR protein 1 [Oryza sativa Japonica Group]
Os07g0661600	0.00613942	1.65006	up	Molecular Function: transition metal ion binding (GO:0046914);;	--	--	Os07g0661600 [Oryza sativa Japonica Group]
Os09g0416600	0.00633109	1.92157	up	--	--	--	uncharacterized protein LOC9269387 [Oryza sativa Japonica Group]
Os07g0510600	6.11e-05	-2.52611	down	--	--	--	anthocyanidin 3-O-glucosyltransferase 2 [Oryza sativa Japonica Group]
Os04g0634800	0.0045747	2.72788	up	--	--	--	uncharacterized protein LOC4337127 [Oryza sativa Japonica Group]
xxx_newGene_13535	0.0484829	-1.05917	down	Molecular Function: protein binding (GO:0005515);; Cellular Component: intracellular membrane-bounded organelle (GO:0043231);; Molecular Function: organic cyclic compound binding (GO:0097159);;	--	--	Putative transposable element [Oryza sativa Japonica Group]
Os08g0120600	0.0485587	2.53191	up	Biological Process: pyruvate metabolic process (GO:0006090);; Molecular Function: aldehyde-lyase activity (GO:0016832);;	K01623|0|osa:4344545|fructose-bisphosphate aldolase cytoplasmic isozyme-like	Glycolysis / Gluconeogenesis (ko00010);; Pentose phosphate pathway (ko00030);; Fructose and mannose metabolism (ko00051);; Carbon fixation in photosynthetic organisms (ko00710);; Carbon metabolism (ko01200);; Biosynthesis of amino acids (ko01230)	fructose-bisphosphate aldolase 6, cytosolic [Oryza sativa Japonica Group]
Os05g0527900	0.0316564	-1.54631	down	--	--	--	UDP-glycosyltransferase 88A1 [Oryza sativa Japonica Group]
Os03g0327600	9.58e-08	7.36213	up	--	--	--	ricin B-like lectin R40C1 [Oryza sativa Japonica Group]
Os07g0229900	0.000188664	1.36837	up	--	K02951|1.69411e-47|osa:4342771|40S ribosomal protein S12	Ribosome (ko03010)	putative 40S ribosomal protein S12 [Oryza sativa Japonica Group]
Os03g0746700	0.0416393	-1.82529	down	Cellular Component: intracellular membrane-bounded organelle (GO:0043231);;	--	--	uncharacterized protein LOC4334091 [Oryza sativa Japonica Group]
Os05g0540300	0.0265568	1.65517	up	Biological Process: protein folding (GO:0006457);; Molecular Function: purine ribonucleoside binding (GO:0032550);; Cellular Component: vacuolar part (GO:0044437);;	K04077|0|osa:4339466|chaperonin CPN60-like 2, mitochondrial	RNA degradation (ko03018)	chaperonin CPN60-like 2, mitochondrial [Oryza sativa Japonica Group]
Os09g0487600	0.0235332	3.06236	up	Molecular Function: hydrolase activity, hydrolyzing O-glycosyl compounds (GO:0004553);; Biological Process: primary metabolic process (GO:0044238);; Cellular Component: vacuolar part (GO:0044437);; Biological Process: external encapsulating structure organization (GO:0045229);;	--	--	probable polygalacturonase [Oryza sativa Japonica Group]
Os08g0387200	0.00385083	1.79618	up	Cellular Component: intrinsic component of membrane (GO:0031224);;	--	--	sulfite exporter TauE/SafE family protein 3 isoform X1 [Oryza sativa Japonica Group]
Os03g0241900	0.0285301	3.15025	up	--	K19366|0|osa:4332215|uncharacterized protein LOC4332215	Endocytosis (ko04144)	protein EARLY-RESPONSIVE TO DEHYDRATION 7, chloroplastic [Oryza sativa Japonica Group]
Os09g0513200	2.19e-07	-2.5001	down	Cellular Component: intrinsic component of membrane (GO:0031224);; Biological Process: establishment of localization (GO:0051234);;	K15287|0|osa:4347556|solute carrier family 35 member F1	--	solute carrier family 35 member F1 [Oryza sativa Japonica Group]
Os02g0726300	0.0342278	-1.43787	down	Molecular Function: regulatory region DNA binding (GO:0000975);; Biological Process: transcription, DNA-templated (GO:0006351);;	--	--	dof zinc finger protein 4 [Oryza sativa Japonica Group]
Os08g0559600	0.0104896	1.34977	up	--	K01687|0|osa:4346318|dihydroxy-acid dehydratase, chloroplastic	Valine, leucine and isoleucine biosynthesis (ko00290);; Pantothenate and CoA biosynthesis (ko00770);; 2-Oxocarboxylic acid metabolism (ko01210);; Biosynthesis of amino acids (ko01230)	dihydroxy-acid dehydratase, chloroplastic [Oryza sativa Japonica Group]
Os07g0666900	0.00575569	1.93835	up	Molecular Function: monovalent cation:proton antiporter activity (GO:0005451);; Biological Process: sodium ion transport (GO:0006814);; Biological Process: response to osmotic stress (GO:0006970);; Biological Process: proton transport (GO:0015992);; Cellular Component: intrinsic component of membrane (GO:0031224);; Cellular Component: vacuolar part (GO:0044437);; Biological Process: metal ion hom…	--	--	sodium/hydrogen exchanger 2 [Oryza sativa Japonica Group]
Os05g0420600	0.0493115	2.11289	up	--	--	--	PREDICTED: cytochrome c [Oryza brachyantha]
Os01g0735300	7.43e-07	-3.1187	down	--	--	--	anthocyanidin 5,3-O-glucosyltransferase [Oryza sativa Japonica Group]
Os02g0771700	0.0283555	-2.44867	down	--	--	--	glucan endo-1,3-beta-glucosidase 12 [Oryza sativa Japonica Group]
Os05g0156700	0.0423179	2.47893	up	Molecular Function: nucleotide binding (GO:0000166);; Molecular Function: oxidoreductase activity, acting on a sulfur group of donors, NAD(P) as acceptor (GO:0016668);; Biological Process: cellular homeostasis (GO:0019725);; Cellular Component: intracellular membrane-bounded organelle (GO:0043231);; Biological Process: single-organism metabolic process (GO:0044710);;	--	--	Os05g0156700, partial [Oryza sativa Japonica Group]
Os02g0753800	0.00600791	4.15019	up	Molecular Function: phospholipid binding (GO:0005543);; Molecular Function: metal ion binding (GO:0046872);;	K17098|0|osa:4330759|annexin D7	--	annexin D7 [Oryza sativa Japonica Group]
Os12g0628100	0.0258052	-1.33828	down	Cellular Component: cytoskeleton (GO:0005856);; Molecular Function: cytoskeletal protein binding (GO:0008092);; Biological Process: actin polymerization or depolymerization (GO:0008154);;	K05765|2.97422e-101|osa:4352848|actin-depolymerizing factor 11	--	actin-depolymerizing factor 11 [Oryza sativa Japonica Group]
Os07g0243150	0.0120054	-1.86229	down	--	--	--	Os07g0243150, partial [Oryza sativa Japonica Group]
Os03g0218500	0.0037399	2.8881	up	Molecular Function: purine ribonucleoside binding (GO:0032550);;	K09489|0|osa:4332080|heat shock 70 kDa protein 8	--	heat shock 70 kDa protein 8 [Oryza sativa Japonica Group]
Os12g0291733	0.0134307	-2.13792	down	Cellular Component: chloroplast (GO:0009507);; Biological Process: carbon fixation (GO:0015977);; Molecular Function: oxidoreductase activity (GO:0016491);; Molecular Function: carboxy-lyase activity (GO:0016831);; Biological Process: cellular metabolic compound salvage (GO:0043094);;	--	--	Os12g0291733, partial [Oryza sativa Japonica Group]
Os03g0576700	0.0107897	1.09449	up	--	K02873|7.86369e-125|osa:4333306|60S ribosomal protein L13-2	Ribosome (ko03010)	60S ribosomal protein L13-2 [Oryza sativa Japonica Group]
Os03g0823400	0.0251359	6.72612	up	Molecular Function: endopeptidase inhibitor activity (GO:0004866);; Biological Process: negative regulation of peptidase activity (GO:0010466);; Molecular Function: hydrolase activity (GO:0016787);;	--	--	Bowman-Birk type trypsin inhibitor [Oryza sativa Japonica Group]
Os01g0633400	0.00751551	1.78985	up	Molecular Function: transition metal ion binding (GO:0046914);;	--	--	SNF1-related protein kinase regulatory subunit gamma-1 [Oryza sativa Japonica Group]
Os08g0290700	0.00500255	4.63551	up	--	--	--	flavonoid O-methyltransferase-like protein Os11g0303600 [Oryza sativa Japonica Group]
Os06g0543400	9.74e-05	-1.11258	down	Molecular Function: protein kinase activity (GO:0004672);; Biological Process: cellular protein modification process (GO:0006464);; Biological Process: phosphate-containing compound metabolic process (GO:0006796);; Biological Process: cell communication (GO:0007154);; Molecular Function: purine ribonucleoside binding (GO:0032550);;	K07198|0|osa:4341236|CBL-interacting protein kinase 25	--	CBL-interacting protein kinase 25 [Oryza sativa Japonica Group]
Os07g0686100	0.000169114	-2.33666	down	Molecular Function: nucleic acid binding transcription factor activity (GO:0001071);; Molecular Function: DNA binding (GO:0003677);; Biological Process: transcription, DNA-templated (GO:0006351);;	K14432|8.94493e-151|osa:4344334|ABSCISIC ACID-INSENSITIVE 5-like protein 5	Plant hormone signal transduction (ko04075)	ABSCISIC ACID-INSENSITIVE 5-like protein 5 [Oryza sativa Japonica Group]
Os03g0305500	0.000555075	2.67395	up	--	K01755|0|osa:4332596|argininosuccinate lyase, chloroplastic	Arginine biosynthesis (ko00220);; Alanine, aspartate and glutamate metabolism (ko00250);; Biosynthesis of amino acids (ko01230)	argininosuccinate lyase [Oryza sativa Japonica Group]
Os07g0134000	3.58e-05	-2.8107	down	--	--	--	amino acid permease 6 [Oryza sativa Japonica Group]
Os01g0192000	0.0204913	1.08765	up	Molecular Function: nucleic acid binding (GO:0003676);; Biological Process: hormone-mediated signaling pathway (GO:0009755);; Cellular Component: intracellular membrane-bounded organelle (GO:0043231);; Molecular Function: transition metal ion binding (GO:0046914);; Biological Process: leaf development (GO:0048366);;	--	--	zinc finger CCCH domain-containing protein 2 [Oryza sativa Japonica Group]
Os01g0304000	0.00599346	1.10809	up	--	K02905|7.20058e-28|osa:4338517|60S ribosomal protein L29-1	Ribosome (ko03010)	hypothetical protein EJB05_32060, partial [Eragrostis curvula]
Os03g0750100	0.00671227	1.08145	up	--	--	--	Os03g0750100 [Oryza sativa Japonica Group]
Os06g0203200	0.0471335	2.18081	up	--	--	--	probable flavin-containing monooxygenase 1 isoform X1 [Oryza sativa Japonica Group]
Os04g0537100	0.0439419	-1.35212	down	Biological Process: response to hormone (GO:0009725);; Cellular Component: intracellular membrane-bounded organelle (GO:0043231);;	K14488|1.66574e-65|osa:4336520|auxin-responsive protein SAUR36	Plant hormone signal transduction (ko04075)	OSJNBa0091D06.3 [Oryza sativa Japonica Group]
Os03g0170900	5.4e-05	1.81363	up	Molecular Function: sugar:proton symporter activity (GO:0005351);; Cellular Component: plasma membrane (GO:0005886);; Biological Process: disaccharide metabolic process (GO:0005984);; Biological Process: pollination (GO:0009856);; Molecular Function: disaccharide transmembrane transporter activity (GO:0015154);; Molecular Function: beta-glucoside transmembrane transporter activity (GO:0015573);; …	K15378|0|osa:4331775|sucrose transport protein SUT1 isoform X2	--	sucrose transport protein SUT1 isoform X2 [Oryza sativa Japonica Group]
Os01g0209901	0.00767387	-2.02458	down	--	--	--	cationic amino acid transporter 5 [Oryza sativa Japonica Group]
Os05g0372200	0.0487957	1.05292	up	--	--	--	ribosomal RNA-processing protein 14-C [Oryza sativa Japonica Group]
Os07g0558100	0.00473682	4.09647	up	Molecular Function: nucleic acid binding (GO:0003676);;	K09422|0|osa:4343580|transcription factor MYB39	--	transcription factor MYB102 [Oryza sativa Japonica Group]
Os03g0802700	0.00171734	1.32087	up	--	K13179|0|osa:4334469|DEAD-box ATP-dependent RNA helicase 27	--	hypothetical protein OsI_13943 [Oryza sativa Indica Group]
Os05g0556900	0.0263568	1.20295	up	--	--	--	Os05g0555800, partial [Oryza sativa Japonica Group]
Os01g0719000	0.0328362	3.06903	up	--	--	--	uncharacterized protein LOC4324694 [Oryza sativa Japonica Group]
xxx_newGene_9029	0.0117837	3.48201	up	Cellular Component: intrinsic component of membrane (GO:0031224);;	--	--	uncharacterized membrane protein At1g16860 isoform X1 [Oryza sativa Japonica Group]
Os08g0241800	0.00577259	-1.06904	down	--	K01535|0|osa:4345039|plasma membrane ATPase-like isoform X1	Oxidative phosphorylation (ko00190)	putative plasma membrane H+-ATPase [Oryza sativa Japonica Group]
Os02g0704300	0.00396517	-1.5003	down	--	--	--	hypothetical protein OsJ_08074 [Oryza sativa Japonica Group]
Os04g0623300	0.0173227	1.18757	up	Molecular Function: transferase activity, transferring one-carbon groups (GO:0016741);; Biological Process: single-organism metabolic process (GO:0044710);;	K17839|0|osa:4337046|probable polyamine oxidase 2	Arginine and proline metabolism (ko00330);; beta-Alanine metabolism (ko00410);; Pantothenate and CoA biosynthesis (ko00770)	probable polyamine oxidase 2 [Oryza sativa Japonica Group]
Os11g0217300	0.00828116	1.0964	up	Biological Process: phosphate-containing compound metabolic process (GO:0006796);; Molecular Function: transferase activity, transferring phosphorus-containing groups (GO:0016772);; Molecular Function: purine ribonucleoside binding (GO:0032550);; Cellular Component: intracellular part (GO:0044424);;	K16190|0|osa:4350084|glucuronokinase 1	Pentose and glucuronate interconversions (ko00040);; Ascorbate and aldarate metabolism (ko00053);; Amino sugar and nucleotide sugar metabolism (ko00520)	glucuronokinase 1 [Oryza sativa Japonica Group]
Os02g0221600	0.0271603	1.44558	up	Cellular Component: intrinsic component of membrane (GO:0031224);;	--	--	uncharacterized protein LOC4328759 isoform X2 [Oryza sativa Japonica Group]
Os07g0169600	0.00076213	3.76916	up	--	--	--	putative iron deficiency protein Ids3 [Oryza sativa Japonica Group]
Os02g0463401	7.77e-07	4.25694	up	--	--	--	hypothetical protein [Oryza sativa Japonica Group]
Os04g0598800	0.0340129	-1.82708	down	--	--	--	wall-associated receptor kinase 5 isoform X1 [Oryza sativa Japonica Group]
Os01g0840100	0.00699955	1.8494	up	Molecular Function: purine ribonucleoside binding (GO:0032550);;	K03283|0|osa:4327388|probable mediator of RNA polymerase II transcription subunit 37c	Spliceosome (ko03040);; Protein processing in endoplasmic reticulum (ko04141);; Endocytosis (ko04144)	probable mediator of RNA polymerase II transcription subunit 37c [Oryza sativa Japonica Group]
Os02g0805250	0.012846	-1.35161	down	--	--	--	transcription factor SPATULA isoform X1 [Oryza sativa Japonica Group]
Os01g0817650	0.00806035	3.49349	up	--	--	--	protein LURP-one-related 8 [Oryza sativa Japonica Group]
Os08g0422600	0.049603	1.25632	up	--	--	--	Os08g0422600, partial [Oryza sativa Japonica Group]
Os03g0200200	1.28e-09	4.58621	up	Cellular Component: microtubule cytoskeleton (GO:0015630);;	--	--	hypothetical protein OsJ_09802 [Oryza sativa Japonica Group]
Os02g0724000	0.00734744	3.94899	up	Molecular Function: nucleic acid binding (GO:0003676);; Cellular Component: cell part (GO:0044464);; Molecular Function: transition metal ion binding (GO:0046914);;	--	--	hypothetical protein OsJ_08199 [Oryza sativa Japonica Group]
Os03g0343500	0.0087299	1.04599	up	--	K02891|2.18871e-59|osa:4332802|60S ribosomal protein L22-2	Ribosome (ko03010)	60S ribosomal protein L22-2 [Oryza sativa Japonica Group]
Os11g0275000	0.0107064	-2.45298	down	Molecular Function: catalytic activity (GO:0003824);;	--	--	Os11g0275000 [Oryza sativa Japonica Group]
Os02g0731700	0.0216557	1.72614	up	Cellular Component: cell part (GO:0044464);; Molecular Function: transition metal ion binding (GO:0046914);;	--	--	zinc finger protein CONSTANS-LIKE 16 [Oryza sativa Japonica Group]
Os01g0191100	2.78e-06	1.7237	up	--	K02943|5.07181e-35|osa:4326782|60S acidic ribosomal protein P2A	Ribosome (ko03010)	60S acidic ribosomal protein P2A [Oryza sativa Japonica Group]
Os03g0269900	0.00647194	3.20852	up	Cellular Component: intrinsic component of membrane (GO:0031224);;	--	--	uncharacterized protein LOC4332381 [Oryza sativa Japonica Group]
Os07g0112100	0.00169367	-2.42889	down	--	--	--	flavin-containing monooxygenase FMO GS-OX-like 9 [Oryza sativa Japonica Group]
Os05g0439000	0.0168828	-2.42631	down	--	--	--	hypothetical protein OsJ_18685 [Oryza sativa Japonica Group]
Os02g0747500	0.000160607	4.45975	up	--	K17279|9.91349e-114|osa:4330723|HVA22-like protein a	--	HVA22-like protein a [Oryza sativa Japonica Group]
Os07g0471900	3.54e-06	-2.90043	down	--	--	--	Os07g0471900 [Oryza sativa Japonica Group]
Os01g0736500	5.28e-05	5.00813	up	Cellular Component: intrinsic component of membrane (GO:0031224);;	--	--	Os01g0736500, partial [Oryza sativa Japonica Group]
Os07g0443500	5.57e-09	-6.99038	down	Molecular Function: nucleic acid binding (GO:0003676);; Cellular Component: intracellular membrane-bounded organelle (GO:0043231);;	--	--	Os07g0443500 [Oryza sativa Japonica Group]
Os03g0258200	0.000420211	6.23504	up	Molecular Function: catalytic activity (GO:0003824);; Cellular Component: intracellular membrane-bounded organelle (GO:0043231);;	--	--	probable carboxylesterase 17 [Oryza sativa Japonica Group]
Os12g0539333	0.0298682	-1.56899	down	Cellular Component: intracellular membrane-bounded organelle (GO:0043231);;	--	--	Os12g0539333, partial [Oryza sativa Japonica Group]
Os05g0565000	0.000559092	1.34548	up	--	K02882|6.09e-129|osa:4339625|60S ribosomal protein L18a-like	Ribosome (ko03010)	60S ribosomal protein L18a-like [Oryza sativa Japonica Group]
Os04g0635400	0.000172224	3.30617	up	--	--	--	Os04g0635400, partial [Oryza sativa Japonica Group]
Os02g0532300	0.00211569	3.94708	up	--	--	--	uncharacterized protein LOC4329550 [Oryza sativa Japonica Group]
Os01g0862600	0.00481357	3.27783	up	--	--	--	rab-like protein 6 isoform X2 [Oryza sativa Japonica Group]
Os01g0720600	3.76e-06	3.89624	up	Biological Process: starch metabolic process (GO:0005982);; Cellular Component: plastid (GO:0009536);; Molecular Function: UDP-glucosyltransferase activity (GO:0035251);;	K00703|0|osa:4324654|probable starch synthase 4, chloroplastic/amyloplastic isoform X1	Starch and sucrose metabolism (ko00500)	probable starch synthase 4, chloroplastic/amyloplastic isoform X1 [Oryza sativa Japonica Group]
Os02g0478600	0.000346468	1.45104	up	Molecular Function: structural molecule activity (GO:0005198);; Biological Process: gene expression (GO:0010467);; Cellular Component: intracellular ribonucleoprotein complex (GO:0030529);;	K02957|1.18793e-88|osa:4329361|40S ribosomal protein S15a-1	Ribosome (ko03010)	PREDICTED: 40S ribosomal protein S15a-1 [Oryza brachyantha]
Os05g0529400	0.00600791	2.34669	up	Cellular Component: intrinsic component of membrane (GO:0031224);; Molecular Function: ubiquitin-like protein binding (GO:0032182);;	--	--	unknown protein [Oryza sativa Japonica Group]
xxx_newGene_3299	0.0176197	1.45121	up	--	--	--	Os03g0122067 [Oryza sativa Japonica Group]
Os01g0935400	0.00636867	-1.40426	down	--	--	--	protein SRG1 [Oryza sativa Japonica Group]
Os01g0649100	0.0369886	1.60955	up	--	K00026|0|osa:4326249|malate dehydrogenase, mitochondrial	Citrate cycle (TCA cycle) (ko00020);; Cysteine and methionine metabolism (ko00270);; Pyruvate metabolism (ko00620);; Glyoxylate and dicarboxylate metabolism (ko00630);; Carbon fixation in photosynthetic organisms (ko00710);; Carbon metabolism (ko01200)	malate dehydrogenase, mitochondrial [Oryza sativa Japonica Group]
Os01g0829000	0.00322823	1.61642	up	Biological Process: transcription, DNA-templated (GO:0006351);; Cellular Component: chloroplast (GO:0009507);; Biological Process: plastid organization (GO:0009657);;	--	--	thioredoxin-like fold domain-containing protein MRL7 homolog, chloroplastic [Oryza sativa Japonica Group]
Os12g0567700	0.00105894	1.20234	up	--	K02938|2.81772e-172|osa:4352560|60S ribosomal protein L8	Ribosome (ko03010)	60S ribosomal protein L8 [Oryza sativa Japonica Group]
Os08g0107500	0.0164322	1.85925	up	--	K14574|0|osa:4344458|ribosome maturation protein SBDS	Ribosome biogenesis in eukaryotes (ko03008)	ribosome maturation protein SBDS [Oryza sativa Japonica Group]
Os11g0635300	0.0117239	-3.61645	down	--	--	--	hypothetical protein EE612_056802 [Oryza sativa]
Os01g0893400	0.000164169	-1.80191	down	Molecular Function: transcription factor activity, transcription factor binding (GO:0000989);; Molecular Function: protein binding (GO:0005515);; Biological Process: transcription, DNA-templated (GO:0006351);; Biological Process: histone modification (GO:0016570);; Cellular Component: intracellular membrane-bounded organelle (GO:0043231);; Molecular Function: transition metal ion binding (GO:0046…	--	--	BTB/POZ and TAZ domain-containing protein 3 [Oryza sativa Japonica Group]
Os09g0482900	0.00206577	-2.3649	down	--	--	--	UDP-glycosyltransferase 88B1 [Oryza sativa Japonica Group]
Os03g0206750	0.0186654	-1.77619	down	--	--	--	BTB/POZ domain-containing protein SR1IP1 isoform X1 [Oryza sativa Japonica Group]
Os04g0568700	0.000511309	2.39076	up	Molecular Function: nucleic acid binding transcription factor activity (GO:0001071);; Molecular Function: DNA binding (GO:0003677);; Biological Process: transcription, DNA-templated (GO:0006351);; Cellular Component: intracellular membrane-bounded organelle (GO:0043231);;	K09419|3.58338e-89|osa:4336701|heat stress transcription factor B-2a	--	OSIGBa0103M18.7 [Oryza sativa]
Os01g0851700	0.00315885	-1.33287	down	--	K00688|0|osa:4324810|alpha-glucan phosphorylase, H isozyme	Starch and sucrose metabolism (ko00500)	alpha-glucan phosphorylase, H isozyme [Oryza sativa Japonica Group]
Os04g0607150	0.00510736	5.09175	up	Cellular Component: intrinsic component of membrane (GO:0031224);;	--	--	Os04g0607150 [Oryza sativa Japonica Group]
Os06g0610800	0.0246137	-3.04439	down	--	--	--	aspartyl protease family protein At5g10770 isoform X1 [Oryza sativa Japonica Group]
Os02g0566450	0.00324935	2.30007	up	Cellular Component: intrinsic component of membrane (GO:0031224);; Cellular Component: intracellular membrane-bounded organelle (GO:0043231);;	--	--	uncharacterized protein LOC4329709 [Oryza sativa Japonica Group]
Os06g0228500	0.00532084	-2.16878	down	--	K15015|0|osa:4340559|vacuolar amino acid transporter 1	--	amino acid transporter AVT1I [Oryza sativa Japonica Group]
Os05g0179950	6.1e-06	4.40531	up	--	--	--	cyanidin 3-O-rutinoside 5-O-glucosyltransferase [Oryza sativa Japonica Group]
Os04g0286300	0.000274023	-2.36638	down	--	--	--	Os04g0286300 [Oryza sativa Japonica Group]
Os05g0100800	0.0263568	1.84598	up	--	K07466|2.44396e-91|osa:9267714|uncharacterized protein At4g28440	DNA replication (ko03030);; Nucleotide excision repair (ko03420);; Mismatch repair (ko03430);; Homologous recombination (ko03440)	uncharacterized protein At4g28440 [Oryza sativa Japonica Group]
Os11g0167300	0.0291167	1.41196	up	Biological Process: gene expression (GO:0010467);; Cellular Component: microbody (GO:0042579);;	--	--	uncharacterized protein LOC4349873 [Oryza sativa Japonica Group]
Os06g0210400	0.0166322	-1.48512	down	--	--	--	L-type lectin-domain containing receptor kinase S.4 [Oryza sativa Japonica Group]
Os04g0586000	0.0145961	-2.0847	down	--	--	--	uncharacterized protein LOC4336795 [Oryza sativa Japonica Group]
Os01g0210600	0.0188797	1.89021	up	--	--	--	uncharacterized protein LOC4325559 [Oryza sativa Japonica Group]
Os03g0767800	0.00798191	2.84804	up	Cellular Component: intrinsic component of membrane (GO:0031224);;	--	--	cold-regulated 413 plasma membrane protein 2 [Oryza sativa Japonica Group]
Os11g0109700	0.0233211	3.10223	up	Cellular Component: intrinsic component of membrane (GO:0031224);; Molecular Function: organic cyclic compound binding (GO:0097159);;	--	--	uncharacterized protein LOC4349573 [Oryza sativa Japonica Group]
Os01g0242600	0.0427721	1.6913	up	Molecular Function: binding (GO:0005488);; Cellular Component: intrinsic component of membrane (GO:0031224);;	--	--	C2 domain-containing protein At1g53590 isoform X1 [Oryza sativa Japonica Group]
Os03g0293450	0.01781	-1.14364	down	Molecular Function: carboxy-lyase activity (GO:0016831);; Molecular Function: vitamin binding (GO:0019842);; Molecular Function: metal ion binding (GO:0046872);;	K01568|0|osa:4332519|pyruvate decarboxylase 2	Glycolysis / Gluconeogenesis (ko00010)	RecName: Full=Pyruvate decarboxylase 2; Short=PDC
xxx_newGene_4632	3.8e-18	7.45309	up	--	--	--	expressed protein [Oryza sativa Japonica Group]
Os02g0116400	0.000346309	-2.137	down	Biological Process: transport (GO:0006810);; Cellular Component: intrinsic component of membrane (GO:0031224);;	--	--	probable metal-nicotianamine transporter YSL8 [Oryza sativa Japonica Group]
Os07g0638100	6.42e-05	6.36807	up	--	--	--	uncharacterized protein LOC4344044 [Oryza sativa Japonica Group]
Os01g0601000	0.00118129	1.75568	up	--	--	--	Os01g0601000 [Oryza sativa Japonica Group]
Os04g0399000	0.00198188	1.31035	up	--	--	--	Os04g0399000, partial [Oryza sativa Japonica Group]
Os03g0575200	8.12e-05	2.06648	up	Cellular Component: intrinsic component of membrane (GO:0031224);; Molecular Function: metal ion transmembrane transporter activity (GO:0046873);; Biological Process: cellular potassium ion transport (GO:0071804);;	K03549|0|osa:4333298|probable potassium transporter 16	--	probable potassium transporter 16 [Oryza sativa Japonica Group]
Os01g0265100	0.0115852	2.58761	up	Biological Process: protein transport (GO:0015031);; Molecular Function: purine ribonucleoside binding (GO:0032550);; Biological Process: intracellular signal transduction (GO:0035556);; Cellular Component: cell part (GO:0044464);;	K07937|6.71455e-130|oeu:111406343|ADP-ribosylation factor 2-like	Endocytosis (ko04144)	hypothetical protein SORBI_3003G122200 [Sorghum bicolor]
Os12g0136900	0.0212582	-1.29929	down	--	K01537|0|osa:4351449|probable calcium-transporting ATPase 4, plasma membrane-type isoform X2	--	probable calcium-transporting ATPase 9, plasma membrane-type [Oryza sativa Japonica Group]
Os02g0622300	0.0107064	1.28308	up	--	K02875|1.05039e-82|osa:4330020|probable 60S ribosomal protein L14	Ribosome (ko03010)	60S ribosomal protein L14-1 [Zea mays]
Os03g0216700	0.031983	-1.5253	down	Biological Process: tricarboxylic acid transport (GO:0006842);; Molecular Function: tricarboxylic acid transmembrane transporter activity (GO:0015142);; Molecular Function: secondary active transmembrane transporter activity (GO:0015291);; Biological Process: drug transport (GO:0015893);; Cellular Component: intrinsic component of membrane (GO:0031224);; Biological Process: cellular transition me…	--	--	protein DETOXIFICATION 42 isoform X1 [Oryza sativa Japonica Group]
Os10g0564500	1.61e-06	1.52201	up	--	--	--	Os10g0564500 [Oryza sativa Japonica Group]
Os06g0617800	0.0106618	3.71131	up	Biological Process: nucleotide metabolic process (GO:0009117);; Biological Process: nucleoside monophosphate biosynthetic process (GO:0009124);; Cellular Component: plastid (GO:0009536);; Molecular Function: diphosphotransferase activity (GO:0016778);; Cellular Component: intrinsic component of membrane (GO:0031224);; Molecular Function: purine ribonucleoside binding (GO:0032550);; Molecular Func…	--	--	putative phosphoribosyl pyrophosphate synthase [Oryza sativa Japonica Group]
Os03g0701100	0.0177426	2.29461	up	--	--	--	Os03g0701100, partial [Oryza sativa Japonica Group]
xxx_newGene_11955	0.0210928	3.87097	up	--	--	--	hypothetical protein [Oryza sativa Japonica Group]
Os09g0378700	0.000545108	4.55223	up	Molecular Function: ubiquitin-like protein transferase activity (GO:0019787);; Biological Process: protein modification by small protein conjugation (GO:0032446);;	--	--	U-box domain-containing protein 19 [Oryza sativa Japonica Group]
Os05g0125500	0.01954	1.90569	up	--	K00253|0|osa:4337676|isovaleryl-CoA dehydrogenase, mitochondrial	Valine, leucine and isoleucine degradation (ko00280)	isovaleryl-CoA dehydrogenase, mitochondrial isoform X2 [Oryza sativa Japonica Group]
Os01g0606133	0.0492032	2.92698	up	Cellular Component: intrinsic component of membrane (GO:0031224);; Cellular Component: vacuolar part (GO:0044437);;	--	--	uncharacterized protein LOC4324215 [Oryza sativa Japonica Group]
Os03g0807800	0.0352463	1.12292	up	--	K02981|1.02775e-170|osa:4334512|40S ribosomal protein S2-3	Ribosome (ko03010)	40S ribosomal protein S2-3 [Oryza sativa Japonica Group]
Os08g0487100	0.0490706	1.51435	up	Molecular Function: nucleic acid binding transcription factor activity (GO:0001071);; Molecular Function: DNA binding (GO:0003677);; Biological Process: transcription, DNA-templated (GO:0006351);; Cellular Component: intracellular membrane-bounded organelle (GO:0043231);;	--	--	bZIP transcription factor RISBZ3-like [Oryza sativa Japonica Group]
Os05g0424000	0.000344451	-1.84676	down	--	--	--	amino acid permease 3 isoform X1 [Oryza sativa Japonica Group]
Os11g0607200	0.000308022	-1.90182	down	Molecular Function: protein kinase activity (GO:0004672);; Biological Process: cellular protein modification process (GO:0006464);; Biological Process: phosphate-containing compound metabolic process (GO:0006796);; Cellular Component: intrinsic component of membrane (GO:0031224);; Molecular Function: purine ribonucleoside binding (GO:0032550);;	--	--	LRR receptor kinase SERK2-like isoform X2 [Oryza sativa Japonica Group]
Os11g0454300	3.44e-19	12.699	up	--	--	--	water stress-inducible protein Rab21 [Oryza sativa Japonica Group]
Os09g0471100	0.00170248	-1.90788	down	Molecular Function: catalytic activity (GO:0003824);; Cellular Component: cytoplasm (GO:0005737);; Biological Process: response to stress (GO:0006950);; Molecular Function: antioxidant activity (GO:0016209);; Biological Process: hydrogen peroxide metabolic process (GO:0042743);; Molecular Function: cation binding (GO:0043169);; Biological Process: single-organism metabolic process (GO:0044710);; …	K00430|0|osa:4347336|peroxidase 17	Phenylpropanoid biosynthesis (ko00940)	peroxidase 17 [Oryza sativa Japonica Group]
Os01g0950900	0.000360349	3.29112	up	Cellular Component: intrinsic component of membrane (GO:0031224);;	K21989|0|osa:4325771|CSC1-like protein At3g54510	--	CSC1-like protein At3g54510 [Oryza sativa Japonica Group]
Os07g0530700	0.0452659	-1.11714	down	Cellular Component: intrinsic component of membrane (GO:0031224);;	--	--	uncharacterized protein LOC4343451 [Oryza sativa Japonica Group]
Os05g0317900	0.0125741	-1.93719	down	Molecular Function: protein kinase activity (GO:0004672);; Biological Process: cellular protein modification process (GO:0006464);; Cellular Component: intrinsic component of membrane (GO:0031224);; Molecular Function: purine ribonucleoside binding (GO:0032550);;	--	--	receptor-like protein kinase FERONIA [Oryza sativa Japonica Group]
Os07g0668900	0.0200449	1.62392	up	Molecular Function: protein kinase activity (GO:0004672);; Biological Process: cellular protein modification process (GO:0006464);; Molecular Function: purine ribonucleoside binding (GO:0032550);; Cellular Component: intracellular membrane-bounded organelle (GO:0043231);;	--	--	probable serine/threonine-protein kinase PBL7 isoform X2 [Oryza sativa Japonica Group]
Os02g0804100	0.00882523	1.14603	up	--	K02983|4.4186e-27|bvg:104889711|40S ribosomal protein S30	Ribosome (ko03010)	PREDICTED: 40S ribosomal protein S30 [Beta vulgaris subsp. vulgaris]
Os06g0154300	3.66e-05	3.16015	up	Biological Process: response to radiation (GO:0009314);; Biological Process: response to water deprivation (GO:0009414);; Biological Process: seed germination (GO:0009845);; Biological Process: meristem structural organization (GO:0009933);; Cellular Component: intracellular membrane-bounded organelle (GO:0043231);; Biological Process: auxin transport (GO:0060918);;	--	--	hypothetical protein OsI_21723 [Oryza sativa Indica Group]
Os12g0605800	0.0228137	1.6187	up	Cellular Component: cytosol (GO:0005829);; Biological Process: leucine metabolic process (GO:0006551);; Molecular Function: CoA carboxylase activity (GO:0016421);; Molecular Function: ligase activity, forming carbon-nitrogen bonds (GO:0016879);; Molecular Function: purine ribonucleoside binding (GO:0032550);; Cellular Component: mitochondrial part (GO:0044429);; Molecular Function: transition met…	K01968|0|osa:4352741|methylcrotonoyl-CoA carboxylase subunit alpha, mitochondrial	Valine, leucine and isoleucine degradation (ko00280)	methylcrotonoyl-CoA carboxylase subunit alpha, mitochondrial [Oryza sativa Japonica Group]
Os03g0286900	1.85e-16	9.78349	up	Cellular Component: intrinsic component of membrane (GO:0031224);;	--	--	low temperature-induced protein lt101.2 [Oryza sativa Japonica Group]
Os04g0684800	0.00649187	-1.68068	down	--	--	--	Os04g0684800, partial [Oryza sativa Japonica Group]
Os10g0491000	0.000332897	4.98071	up	--	--	--	uncharacterized protein LOC4348974 [Oryza sativa Japonica Group]
Os02g0773200	2.47e-05	5.08826	up	--	--	--	universal stress protein PHOS32 [Oryza sativa Japonica Group]
Os08g0326400	0.0270542	1.06732	up	--	K02936|6.6521e-146|osa:4345279|60S ribosomal protein L7a	Ribosome (ko03010)	60S ribosomal protein L7a-1 [Oryza sativa Japonica Group]
Os06g0155400	4.8e-07	-1.8858	down	Cellular Component: intrinsic component of membrane (GO:0031224);; Cellular Component: intracellular membrane-bounded organelle (GO:0043231);; Molecular Function: transition metal ion binding (GO:0046914);;	--	--	uncharacterized protein LOC4340175 [Oryza sativa Japonica Group]
Os06g0214300	0.00833109	3.11665	up	Molecular Function: catalytic activity (GO:0003824);;	--	--	tuliposide A-converting enzyme 1, chloroplastic [Oryza sativa Japonica Group]
Os03g0161200	0.00750827	1.78226	up	--	--	--	Os03g0161200, partial [Oryza sativa Japonica Group]
Os06g0283300	0.00552579	-1.05481	down	--	--	--	hypothetical protein OsI_22555 [Oryza sativa Indica Group]
xxx_newGene_6301	9.32e-05	-2.59318	down	Molecular Function: transferase activity, transferring acyl groups (GO:0016746);;	--	--	Os04g0638401 [Oryza sativa Japonica Group]
Os01g0823100	0.0174025	-4.44532	down	Cellular Component: external encapsulating structure (GO:0030312);; Biological Process: cell wall organization (GO:0071555);;	--	--	expansin-A2 [Oryza sativa Japonica Group]
Os08g0205900	0.000289481	-2.02811	down	--	K16871|0|osa:4344928|probable gamma-aminobutyrate transaminase 3, mitochondrial	Alanine, aspartate and glutamate metabolism (ko00250);; Butanoate metabolism (ko00650)	probable gamma-aminobutyrate transaminase 3, mitochondrial [Oryza sativa Japonica Group]
Os10g0442100	0.00120516	1.71308	up	Biological Process: RNA methylation (GO:0001510);; Biological Process: pyruvate metabolic process (GO:0006090);; Biological Process: phosphate-containing compound metabolic process (GO:0006796);; Biological Process: tRNA processing (GO:0008033);; Molecular Function: kinase activity (GO:0016301);; Molecular Function: tRNA (guanine) methyltransferase activity (GO:0016423);; Molecular Function: tran…	K00927|0|osa:4348728|phosphoglycerate kinase isoform X1	Glycolysis / Gluconeogenesis (ko00010);; Carbon fixation in photosynthetic organisms (ko00710);; Carbon metabolism (ko01200);; Biosynthesis of amino acids (ko01230)	uncharacterized protein LOC4348728 isoform X1 [Oryza sativa Japonica Group]
Os10g0556200	0.00562884	-1.76756	down	Molecular Function: protein binding (GO:0005515);; Cellular Component: cell-cell junction (GO:0005911);; Biological Process: fertilization (GO:0009566);;	--	--	transcription factor UNE10 isoform X1 [Oryza sativa Japonica Group]
Os09g0538800	0.00160924	1.03239	up	--	--	--	synaptotagmin-2 [Oryza sativa Japonica Group]
Os07g0109500	2.02e-05	1.49026	up	--	K02872|1.14973e-131|osa:4342219|60S ribosomal protein L13a-2	Ribosome (ko03010)	60S ribosomal protein L13a-2 [Oryza sativa Japonica Group]
Os01g0130200	0.00477458	-1.70675	down	--	--	--	protein NEGATIVE REGULATOR OF RESISTANCE [Oryza sativa Japonica Group]
Os01g0166100	0.0116756	2.27563	up	--	--	--	probable staphylococcal-like nuclease CAN1 [Oryza sativa Japonica Group]
Os04g0403900	0.0391244	-1.25886	down	--	--	--	hypothetical protein OsI_15761 [Oryza sativa Indica Group]
Os02g0821200	0.000330917	1.3691	up	--	--	--	Os02g0821200, partial [Oryza sativa Japonica Group]
Os09g0426000	9.09e-08	4.81979	up	--	--	--	WAT1-related protein At4g28040 isoform X1 [Oryza sativa Japonica Group]
Os01g0382700	0.00552579	1.10606	up	--	--	--	uncharacterized protein LOC4325426 isoform X1 [Oryza sativa Japonica Group]
Os03g0286200	0.0265158	2.20477	up	Biological Process: L-phenylalanine metabolic process (GO:0006558);; Biological Process: cellular amino acid biosynthetic process (GO:0008652);; Cellular Component: plastid stroma (GO:0009532);; Molecular Function: hydro-lyase activity (GO:0016836);; Molecular Function: intramolecular transferase activity (GO:0016866);; Molecular Function: carboxylic acid binding (GO:0031406);;	K05359|0|osa:4332477|arogenate dehydratase/prephenate dehydratase 2, chloroplastic	Phenylalanine, tyrosine and tryptophan biosynthesis (ko00400);; Biosynthesis of amino acids (ko01230)	arogenate dehydratase/prephenate dehydratase 2, chloroplastic [Oryza sativa Japonica Group]
Os06g0602800	0.0308186	2.13816	up	Molecular Function: UDP-glycosyltransferase activity (GO:0008194);; Cellular Component: intrinsic component of membrane (GO:0031224);;	K20891|4.05189e-153|osa:4341461|beta-glucuronosyltransferase GlcAT14A	--	beta-glucuronosyltransferase GlcAT14A [Oryza sativa Japonica Group]
Os04g0540200	0.0442194	-1.65611	down	Cellular Component: intracellular (GO:0005622);; Molecular Function: transition metal ion binding (GO:0046914);;	--	--	B-box zinc finger protein 20 isoform X2 [Oryza sativa Japonica Group]
Os06g0165500	0.0041414	-1.73212	down	--	--	--	Os06g0165500 [Oryza sativa Japonica Group]
Os03g0230300	3.6e-06	7.94845	up	Molecular Function: transferase activity, transferring pentosyl groups (GO:0016763);; Cellular Component: intracellular membrane-bounded organelle (GO:0043231);;	--	--	probable inactive poly [ADP-ribose] polymerase SRO2 [Oryza sativa Japonica Group]
Os10g0456600	0.0332556	2.75251	up	--	K07910|2.9354e-126|osa:4348795|ras-related protein RABC2a	--	ras-related protein RABC2a [Oryza sativa Japonica Group]
Os06g0695500	0.0438362	-2.04332	down	Molecular Function: catalytic activity (GO:0003824);; Biological Process: response to stress (GO:0006950);; Molecular Function: antioxidant activity (GO:0016209);; Biological Process: hydrogen peroxide metabolic process (GO:0042743);; Molecular Function: cation binding (GO:0043169);; Biological Process: single-organism metabolic process (GO:0044710);; Molecular Function: tetrapyrrole binding (GO:…	K00430|0|osa:4341935|peroxidase 16	Phenylpropanoid biosynthesis (ko00940)	peroxidase 16 [Oryza sativa Japonica Group]
Os01g0971800	0.00480275	4.52603	up	Molecular Function: nucleic acid binding (GO:0003676);; Biological Process: transcription, DNA-templated (GO:0006351);; Cellular Component: intracellular membrane-bounded organelle (GO:0043231);;	--	--	transcription factor PCL1 [Oryza sativa Japonica Group]
Os03g0390000	0.00298082	1.23283	up	Molecular Function: structural molecule activity (GO:0005198);; Cellular Component: ribosome (GO:0005840);; Biological Process: gene expression (GO:0010467);; Biological Process: ribosome biogenesis (GO:0042254);;	K02991|7.75145e-145|osa:4333016|40S ribosomal protein S6	Ribosome (ko03010)	40S ribosomal protein S6 [Oryza sativa Japonica Group]
Os04g0186450	0.0161899	-1.22838	down	--	K08176|0|obr:102700704|probable inorganic phosphate transporter 1-4	--	PREDICTED: LOW QUALITY PROTEIN: probable inorganic phosphate transporter 1-4 [Oryza brachyantha]
Os05g0548100	0.0328921	1.32514	up	Cellular Component: intrinsic component of membrane (GO:0031224);;	--	--	uncharacterized protein LOC4339509 [Oryza sativa Japonica Group]
Os01g0769900	7.42e-05	1.67272	up	--	--	--	protein PLASTID TRANSCRIPTIONALLY ACTIVE 12, chloroplastic-like isoform X3 [Oryza sativa Japonica Group]
Os02g0277700	0.00220718	-1.87826	down	Molecular Function: protein kinase activity (GO:0004672);; Biological Process: cellular protein modification process (GO:0006464);; Biological Process: phosphate-containing compound metabolic process (GO:0006796);; Cellular Component: intrinsic component of membrane (GO:0031224);; Molecular Function: purine ribonucleoside binding (GO:0032550);;	--	--	Os02g0277700, partial [Oryza sativa Japonica Group]
Os04g0103200	0.00593339	1.03561	up	--	K15030|0|osa:4334895|eukaryotic translation initiation factor 3 subunit M	--	eukaryotic translation initiation factor 3 subunit M [Oryza sativa Japonica Group]
Os04g0523100	0.00133237	-1.8469	down	--	--	--	unnamed protein product [Oryza sativa Japonica Group]
Os01g0908800	0.036606	1.05064	up	--	--	--	pentatricopeptide repeat-containing protein At2g36240 [Oryza sativa Japonica Group]
Os08g0498100	0.00111364	1.49214	up	Biological Process: metabolic process (GO:0008152);; Molecular Function: methyltransferase activity (GO:0008168);; Molecular Function: cation binding (GO:0043169);; Cellular Component: intracellular membrane-bounded organelle (GO:0043231);;	K18883|1.46553e-151|osa:4345934|tricin synthase 1	--	tricin synthase 1 [Oryza sativa Japonica Group]
Os04g0614700	0.00404684	-2.383	down	Molecular Function: transferase activity, transferring nitrogenous groups (GO:0016769);; Cellular Component: intrinsic component of membrane (GO:0031224);; Molecular Function: anion binding (GO:0043168);;	--	--	Os04g0614700, partial [Oryza sativa Japonica Group]
Os03g0722400	2.02e-05	3.97576	up	--	K19001|0|osa:4333943|ATP-dependent DNA helicase DDM1 isoform X1	--	ATP-dependent DNA helicase DDM1 isoform X2 [Oryza sativa Japonica Group]
Os07g0192000	0.024548	3.7775	up	Cellular Component: intrinsic component of membrane (GO:0031224);; Molecular Function: purine ribonucleoside binding (GO:0032550);;	--	--	AAA-ATPase At3g28580 [Oryza sativa Japonica Group]
Os09g0572400	0.00750827	2.42904	up	--	K06185|0|osa:4347924|ABC transporter F family member 1	--	ABC transporter F family member 1 [Oryza sativa Japonica Group]
Os06g0133400	0.000520284	5.92925	up	--	--	--	Os06g0133400, partial [Oryza sativa Japonica Group]
Os08g0110600	0.000617114	3.30888	up	--	--	--	uncharacterized protein LOC4344481 [Oryza sativa Japonica Group]
Os07g0523150	0.0169075	1.15689	up	--	K02929|6.3239e-63|zma:100284825|60S ribosomal protein L44	Ribosome (ko03010)	unnamed protein product [Triticum turgidum subsp. durum]
Os01g0916600	0.000606545	1.44332	up	Molecular Function: small molecule binding (GO:0036094);; Molecular Function: organic cyclic compound binding (GO:0097159);;	--	--	glycine-rich RNA-binding protein 4, mitochondrial [Oryza sativa Japonica Group]
Os02g0321900	0.00171186	1.47175	up	--	K02865|3.66562e-140|osa:4329171|60S ribosomal protein L10a	Ribosome (ko03010)	60S ribosomal protein L10a [Oryza sativa Japonica Group]
Os02g0717500	0.0218558	2.53832	up	--	--	--	uncharacterized protein LOC4330530 isoform X1 [Oryza sativa Japonica Group]
Os07g0100200	0.00152207	-1.31046	down	--	K06215|0|osa:4342162|probable pyridoxal 5'-phosphate synthase subunit PDX1.1	Vitamin B6 metabolism (ko00750);; Biosynthesis of cofactors (ko01240)	probable pyridoxal 5&apos;-phosphate synthase subunit PDX1.1 [Oryza sativa Japonica Group]
Os01g0259900	0.0153176	1.38042	up	Cellular Component: nuclear lumen (GO:0031981);;	--	--	Os01g0259900, partial [Oryza sativa Japonica Group]
Os11g0154900	0.000634673	3.96669	up	Molecular Function: nucleic acid binding transcription factor activity (GO:0001071);; Molecular Function: DNA binding (GO:0003677);; Biological Process: transcription, DNA-templated (GO:0006351);; Cellular Component: intracellular membrane-bounded organelle (GO:0043231);;	--	--	uncharacterized protein LOC4349815 [Oryza sativa Japonica Group]
Os08g0174900	0.0213403	1.11653	up	--	--	--	CRS2-associated factor 1, mitochondrial [Oryza sativa Japonica Group]
Os08g0434150	0.0339669	1.93685	up	Molecular Function: nucleic acid binding (GO:0003676);; Molecular Function: endoribonuclease activity, producing 3'-phosphomonoesters (GO:0016892);; Biological Process: RNA phosphodiester bond hydrolysis (GO:0090501);;	K01166|2.14932e-112|osa:4345656|extracellular ribonuclease LE	--	extracellular ribonuclease LE [Oryza sativa Japonica Group]
Os06g0140900	7.29e-06	3.67566	up	--	--	--	unknown protein [Oryza sativa Japonica Group]
Os07g0602900	3.06e-06	2.44256	up	Biological Process: cell communication (GO:0007154);; Cellular Component: intracellular membrane-bounded organelle (GO:0043231);;	--	--	ninja-family protein Os07g0602900 [Oryza sativa Japonica Group]
Os03g0177500	0.000660889	1.35908	up	--	K03231|0|osa:4331812|elongation factor 1-alpha	RNA transport (ko03013)	PREDICTED: elongation factor 1-alpha [Oryza brachyantha]
Os10g0573800	0.0308627	-1.16102	down	--	K15109|8.37501e-176|osa:4349476|mitochondrial carnitine/acylcarnitine carrier-like protein	--	mitochondrial carnitine/acylcarnitine carrier-like protein [Oryza sativa Japonica Group]
Os02g0220400	0.0396456	-1.14476	down	--	--	--	protein CYTOKININ-RESPONSIVE GATA TRANSCRIPTION FACTOR 1-like [Oryza sativa Japonica Group]
Os06g0607200	0.0266117	-1.36654	down	--	--	--	phosphatidylinositol/phosphatidylcholine transfer protein SFH2 isoform X1 [Brachypodium distachyon]
xxx_newGene_5466	0.0156337	1.28606	up	--	--	--	putative gypsy-type retrotransposon [Oryza sativa Japonica Group]
Os10g0548100	4.06e-16	10.5865	up	Cellular Component: intrinsic component of membrane (GO:0031224);; Cellular Component: intracellular membrane-bounded organelle (GO:0043231);;	--	--	unknown protein [Oryza sativa Japonica Group]
Os10g0528100	0.000805957	1.85332	up	--	--	--	putative glutathione S-transferase [Oryza sativa Japonica Group]
Os04g0542800	0.000199859	-1.57286	down	Biological Process: transport (GO:0006810);; Cellular Component: intrinsic component of membrane (GO:0031224);; Cellular Component: intracellular membrane-bounded organelle (GO:0043231);;	--	--	hypothetical protein OsI_16833 [Oryza sativa Indica Group]
Os04g0474800	0.0128892	-1.73926	down	--	K01188|0|osa:4336145|beta-glucosidase 12 isoform X1	Cyanoamino acid metabolism (ko00460);; Starch and sucrose metabolism (ko00500);; Phenylpropanoid biosynthesis (ko00940)	Os04g0474800, partial [Oryza sativa Japonica Group]
Os01g0100900	0.033895	2.21999	up	Biological Process: sphingolipid metabolic process (GO:0006665);; Molecular Function: aldehyde-lyase activity (GO:0016832);; Cellular Component: intrinsic component of membrane (GO:0031224);; Molecular Function: anion binding (GO:0043168);; Cellular Component: intracellular membrane-bounded organelle (GO:0043231);; Biological Process: oxoacid metabolic process (GO:0043436);;	K01634|0|osa:4326459|sphingosine-1-phosphate lyase	Sphingolipid metabolism (ko00600)	sphingosine-1-phosphate lyase [Oryza sativa Japonica Group]
Os12g0133050	0.0472834	1.11082	up	--	K02941|0|osa:9266027|60S acidic ribosomal protein P0-like	Ribosome (ko03010)	hypothetical protein OsI_37384 [Oryza sativa Indica Group]
Os05g0475700	0.000184943	-1.84998	down	--	--	--	protein NUCLEAR FUSION DEFECTIVE 4 [Oryza sativa Japonica Group]
Os02g0654600	0.0112745	2.69744	up	Cellular Component: intracellular membrane-bounded organelle (GO:0043231);;	--	--	Os02g0654600 [Oryza sativa Japonica Group]
Os03g0644600	0.0283592	1.49515	up	Cellular Component: intrinsic component of membrane (GO:0031224);;	--	--	uncharacterized protein LOC107276624 [Oryza sativa Japonica Group]
Os04g0442700	0.0220369	1.76158	up	--	--	--	Os04g0442700, partial [Oryza sativa Japonica Group]
Os01g0853600	0.0348165	-1.30547	down	--	--	--	hypothetical protein OsI_04469 [Oryza sativa Indica Group]
Os03g0255000	0.000391458	-1.98537	down	Biological Process: transcription, DNA-templated (GO:0006351);; Molecular Function: transition metal ion binding (GO:0046914);;	--	--	Os03g0255000, partial [Oryza sativa Japonica Group]
Os10g0522000	0.0209393	-1.25728	down	--	--	--	hypothetical protein OsI_34362 [Oryza sativa Indica Group]
Os08g0128500	0.001796	1.27857	up	--	K02922|2.30463e-60|osa:4344579|60S ribosomal protein L37-1	Ribosome (ko03010)	60S ribosomal protein L37-1 [Oryza sativa Japonica Group]
Os03g0760100	0.0149058	-1.65244	down	Biological Process: generation of precursor metabolites and energy (GO:0006091);; Molecular Function: oxidoreductase activity (GO:0016491);; Molecular Function: transferase activity, transferring glycosyl groups (GO:0016757);; Cellular Component: intrinsic component of membrane (GO:0031224);; Cellular Component: intracellular membrane-bounded organelle (GO:0043231);; Biological Process: single-or…	--	--	crocetin glucosyltransferase 3 [Oryza sativa Japonica Group]
Os05g0491200	0.00171186	2.65249	up	Biological Process: cellular response to nutrient levels (GO:0031669);; Biological Process: response to disaccharide (GO:0034285);;	--	--	beta subunit 2 of SnRK1 [Oryza sativa Japonica Group]
Os01g0842500	3.56e-14	5.03796	up	--	K05909|0|osa:4327501|laccase-12/13-like	--	laccase-13-like [Oryza sativa Japonica Group]
Os04g0620400	0.0293637	-1.21201	down	--	K15501|0|osa:4337029|serine/threonine-protein phosphatase 6 regulatory subunit 3 isoform X1	--	serine/threonine-protein phosphatase 6 regulatory subunit 3 isoform X1 [Oryza sativa Japonica Group]
Os03g0388900	7.12e-05	-1.9719	down	Molecular Function: hydrolase activity (GO:0016787);; Biological Process: protein metabolic process (GO:0019538);;	K22684|0|osa:4333009|metacaspase-1	--	metacaspase-1 [Oryza sativa Japonica Group]
Os02g0178000	0.00178408	-1.39243	down	--	--	--	CBL-interacting serine/threonine-protein kinase 21 [Oryza sativa Japonica Group]
Os06g0687600	0.0413439	-1.4508	down	--	--	--	protein IRX15-LIKE [Oryza sativa Japonica Group]
Os04g0681600	0.00504555	-1.65389	down	Cellular Component: intrinsic component of membrane (GO:0031224);;	K15377|0|osa:4337433|choline transporter-like protein 2 isoform X1	--	choline transporter protein 1 isoform X1 [Oryza sativa Japonica Group]
Os07g0517100	0.00323636	-2.4414	down	Biological Process: response to stress (GO:0006950);; Cellular Component: intracellular part (GO:0044424);;	K13993|4.61262e-52|osa:4343386|18.8 kDa class V heat shock protein	Protein processing in endoplasmic reticulum (ko04141)	unknown protein [Oryza sativa Japonica Group]
Os05g0516550	2.37e-09	5.72637	up	Molecular Function: protein kinase activity (GO:0004672);; Biological Process: cellular protein modification process (GO:0006464);; Biological Process: phosphate-containing compound metabolic process (GO:0006796);; Cellular Component: intrinsic component of membrane (GO:0031224);; Molecular Function: purine ribonucleoside binding (GO:0032550);; Cellular Component: intracellular membrane-bounded o…	--	--	hypothetical protein OsI_20630 [Oryza sativa Indica Group]
Os10g0202900	0.000296958	2.06929	up	--	--	--	uncharacterized protein LOC4348261 [Oryza sativa Japonica Group]
Os01g0915000	1.66e-09	6.82219	up	--	--	--	hypothetical protein OsI_04906 [Oryza sativa Indica Group]
Os06g0686500	0.0266799	1.52759	up	--	--	--	mitochondrial intermediate peptidase, mitochondrial [Oryza sativa Japonica Group]
Os03g0769600	0.0130198	1.06566	up	Cellular Component: chloroplast thylakoid (GO:0009534);; Cellular Component: intrinsic component of membrane (GO:0031224);; Biological Process: cellular protein complex assembly (GO:0043623);;	K07399|0|osa:4334251|cytochrome c biogenesis protein CCS1, chloroplastic	--	cytochrome c biogenesis protein CCS1, chloroplastic [Oryza sativa Japonica Group]
Os03g0406900	0.0189575	1.67863	up	--	--	--	protein LAZ1 homolog 2 isoform X1 [Oryza sativa Japonica Group]
Os01g0834100	0.020144	-1.58016	down	Cellular Component: intracellular membrane-bounded organelle (GO:0043231);;	--	--	interactor of constitutive active ROPs 2, chloroplastic isoform X2 [Oryza sativa Japonica Group]
Os01g0518500	0.0107837	1.15391	up	Molecular Function: alpha-galactosidase activity (GO:0004557);; Cellular Component: external encapsulating structure (GO:0030312);; Cellular Component: intracellular membrane-bounded organelle (GO:0043231);; Biological Process: primary metabolic process (GO:0044238);;	--	--	uncharacterized protein LOC4323975 [Oryza sativa Japonica Group]
Os10g0173000	6.91e-14	6.20472	up	Cellular Component: intrinsic component of membrane (GO:0031224);;	--	--	uncharacterized protein LOC4348192 [Oryza sativa Japonica Group]
Os03g0618300	0.0397909	-1.40397	down	--	--	--	probable 2-oxoglutarate-dependent dioxygenase At5g05600 [Oryza sativa Japonica Group]
Os06g0288300	0.0200077	-1.33756	down	--	K23154|0|osa:9266253|UDP-glycosyltransferase 708A6	--	UDP-glucose:2-hydroxyflavanone C-glucosyltransferase-like [Oryza sativa Japonica Group]
Os02g0503900	0.0204913	1.02566	up	--	--	--	isoflavone 2&apos;-hydroxylase [Oryza sativa Japonica Group]
Os10g0430200	0.0259578	-1.18119	down	Biological Process: phenylpropanoid biosynthetic process (GO:0009699);; Molecular Function: oxidoreductase activity, acting on the CH-OH group of donors, NAD or NADP as acceptor (GO:0016616);; Molecular Function: transition metal ion binding (GO:0046914);;	K00083|0|osa:4348690|probable cinnamyl alcohol dehydrogenase 3	Phenylpropanoid biosynthesis (ko00940)	probable cinnamyl alcohol dehydrogenase 3 [Oryza sativa Japonica Group]
Os03g0109500	0.00959579	1.61806	up	--	K02962|9.16511e-99|osa:4331346|40S ribosomal protein S17-3	Ribosome (ko03010)	hypothetical protein OsI_09682 [Oryza sativa Indica Group]
Os03g0568600	0.0369267	1.154	up	--	--	--	uncharacterized protein LOC4333278 [Oryza sativa Japonica Group]
Os04g0487300	0.0194159	1.34571	up	Molecular Function: nucleic acid binding (GO:0003676);; Molecular Function: DNA-directed 5'-3' RNA polymerase activity (GO:0003899);; Biological Process: transcription, DNA-templated (GO:0006351);; Cellular Component: nucleoplasm part (GO:0044451);; Cellular Component: nuclear DNA-directed RNA polymerase complex (GO:0055029);;	--	--	unnamed protein product [Oryza sativa Japonica Group]
Os05g0457300	0.000149487	2.1541	up	Molecular Function: phosphoprotein phosphatase activity (GO:0004721);; Biological Process: cellular protein modification process (GO:0006464);; Molecular Function: cation binding (GO:0043169);;	K14497|5.45076e-95|osa:9270549|probable protein phosphatase 2C 49	MAPK signaling pathway - plant (ko04016);; Plant hormone signal transduction (ko04075)	hypothetical protein SORBI_3009G161800 [Sorghum bicolor]
Os01g0649200	0.0188657	2.86958	up	--	--	--	Os01g0649200, partial [Oryza sativa Japonica Group]
Os03g0265600	0.00382409	1.19567	up	Cellular Component: viral capsid (GO:0019028);; Molecular Function: small molecule binding (GO:0036094);; Cellular Component: intracellular membrane-bounded organelle (GO:0043231);; Molecular Function: organic cyclic compound binding (GO:0097159);;	--	--	Uncharacterized RNA-binding protein C25G10.01 [Triticum urartu]
Os01g0929200	0.0201942	-1.25643	down	Molecular Function: protein kinase activity (GO:0004672);; Biological Process: cellular protein modification process (GO:0006464);; Biological Process: phosphate-containing compound metabolic process (GO:0006796);; Cellular Component: intrinsic component of membrane (GO:0031224);; Molecular Function: purine ribonucleoside binding (GO:0032550);;	--	--	serine/threonine-protein kinase-like protein ACR4 isoform X1 [Oryza sativa Japonica Group]
Os09g0364500	0.0378804	2.39589	up	--	--	--	GTP-binding protein BRASSINAZOLE INSENSITIVE PALE GREEN 2, chloroplastic [Oryza sativa Japonica Group]
Os09g0513100	0.000456961	4.71115	up	Molecular Function: transferase activity, transferring acyl groups other than amino-acyl groups (GO:0016747);; Cellular Component: intracellular membrane-bounded organelle (GO:0043231);; Biological Process: primary metabolic process (GO:0044238);;	K22389|0|osa:9269832|phospholipase A(1) LCAT3 isoform X1	Glycerophospholipid metabolism (ko00564);; alpha-Linolenic acid metabolism (ko00592)	unnamed protein product [Oryza sativa Japonica Group]
Os10g0484300	0.0344792	-1.36073	down	--	--	--	pentatricopeptide repeat-containing protein At1g09820 [Oryza sativa Japonica Group]
Os02g0526400	0.00103236	4.01354	up	--	K03696|0|osa:4329520|chaperone protein ClpD1, chloroplastic	--	chaperone protein ClpD1, chloroplastic isoform X2 [Oryza sativa Japonica Group]
Os03g0693400	0.00236554	2.0326	up	Cellular Component: intracellular membrane-bounded organelle (GO:0043231);;	--	--	hypothetical protein OsI_13107 [Oryza sativa Indica Group]
Os05g0567600	1.95e-14	-5.10753	down	Molecular Function: nucleic acid binding (GO:0003676);;	--	--	protein RADIALIS-like 3 [Oryza sativa Japonica Group]
Os06g0622000	0.00295064	1.77214	up	Molecular Function: transition metal ion binding (GO:0046914);;	--	--	MORC family CW-type zinc finger protein 3 isoform X2 [Oryza sativa Japonica Group]
Os03g0132250	0.0173623	1.13117	up	--	--	--	expansin-like A1 isoform X1 [Setaria italica]
Os11g0115350	0.0376951	2.17503	up	Molecular Function: binding (GO:0005488);; Biological Process: lipid localization (GO:0010876);; Biological Process: establishment of localization (GO:0051234);;	--	--	nonspecific lipid-transfer protein 3, partial [Oryza sativa]
Os01g0221400	0.00182559	-1.5524	down	--	--	--	uncharacterized protein LOC9272458 [Oryza sativa Japonica Group]
Os12g0592200	0.0277027	1.20306	up	Cellular Component: intracellular membrane-bounded organelle (GO:0043231);;	--	--	Os12g0592200 [Oryza sativa Japonica Group]
Os02g0669100	0.0389955	3.0283	up	--	--	--	dehydrin DHN1 [Oryza sativa Japonica Group]
Os12g0441600	0.00171186	-1.74925	down	--	--	--	Os12g0441600, partial [Oryza sativa Japonica Group]
Os07g0162600	0.017967	2.70677	up	--	--	--	probable carboxylesterase 15 [Oryza sativa Japonica Group]
Os03g0292900	0.0028651	1.74914	up	Biological Process: protein transport (GO:0015031);; Molecular Function: Ras GTPase binding (GO:0017016);; Cellular Component: cell part (GO:0044464);;	--	--	hypothetical protein OsJ_10459 [Oryza sativa Japonica Group]
Os05g0477600	0.0425976	-4.24563	down	--	--	--	expansin-A4 [Oryza sativa Japonica Group]
Os07g0671000	0.000886039	-2.56913	down	--	--	--	flowering-promoting factor 1-like protein 5 [Oryza sativa Japonica Group]
Os09g0520500	0.00152207	-3.08977	down	--	--	--	unknown protein [Oryza sativa Japonica Group]
Os04g0526800	9.7e-09	1.97487	up	--	--	--	GEM-like protein 4 [Oryza sativa Japonica Group]
Os04g0685300	0.00576252	4.42606	up	--	--	--	NDR1/HIN1-like protein 2 [Oryza sativa Japonica Group]
Os03g0301800	0.00454088	2.60592	up	Molecular Function: motor activity (GO:0003774);; Biological Process: microtubule-based process (GO:0007017);; Molecular Function: tubulin binding (GO:0015631);; Molecular Function: purine ribonucleoside binding (GO:0032550);; Cellular Component: intracellular organelle (GO:0043229);;	--	--	Os03g0301800, partial [Oryza sativa Japonica Group]
Os11g0482000	0.00234549	1.39942	up	--	K02989|6.50063e-142|osa:4350516|40S ribosomal protein S5	Ribosome (ko03010)	40S ribosomal protein S5 [Oryza sativa Japonica Group]
Os07g0605400	4.19e-08	-2.96307	down	Cellular Component: intrinsic component of membrane (GO:0031224);;	--	--	hypothetical protein OsJ_25048 [Oryza sativa Japonica Group]
Os12g0577600	0.00605459	-1.01854	down	--	--	--	hypothetical protein OsI_38863 [Oryza sativa Indica Group]
Os08g0191200	0.00280493	1.30139	up	Biological Process: purine nucleobase metabolic process (GO:0006144);; Molecular Function: ligase activity, forming carbon-nitrogen bonds (GO:0016879);; Molecular Function: purine ribonucleoside binding (GO:0032550);; Molecular Function: cation binding (GO:0043169);; Cellular Component: intracellular membrane-bounded organelle (GO:0043231);;	K01945|0|osa:4344854|phosphoribosylamine--glycine ligase isoform X1	Purine metabolism (ko00230)	phosphoribosylamine--glycine ligase isoform X1 [Oryza sativa Japonica Group]
Os02g0794700	0.044974	1.12678	up	Molecular Function: metallopeptidase activity (GO:0008237);; Molecular Function: exopeptidase activity (GO:0008238);; Cellular Component: plastid (GO:0009536);; Biological Process: protein metabolic process (GO:0019538);; Molecular Function: transition metal ion binding (GO:0046914);;	--	--	RecName: Full=Leucine aminopeptidase 2, chloroplastic; AltName: Full=Leucyl aminopeptidase 2; Short=LAP 2; AltName: Full=Proline aminopeptidase 2; AltName: Full=Prolyl aminopeptidase 2; Flags: Precursor
Os09g0503100	0.0463978	-1.6225	down	Molecular Function: catalytic activity (GO:0003824);; Biological Process: single-organism metabolic process (GO:0044710);; Molecular Function: transition metal ion binding (GO:0046914);;	K00224|0|osa:4347496|putative quinone-oxidoreductase homolog, chloroplastic	alpha-Linolenic acid metabolism (ko00592)	hypothetical protein OsI_31936 [Oryza sativa Indica Group]
Os01g0142300	0.00153185	-2.0111	down	--	--	--	unknown protein [Oryza sativa Japonica Group]
Os03g0688450	0.00782905	-1.4129	down	--	K13412|0|osa:4333767|calcium-dependent protein kinase 10	Plant-pathogen interaction (ko04626)	calcium-dependent protein kinase 9 [Oryza sativa Japonica Group]
Os10g0578950	0.0002467	-1.89886	down	Biological Process: ubiquinone metabolic process (GO:0006743);; Molecular Function: ligase activity, forming carbon-sulfur bonds (GO:0016877);; Cellular Component: intrinsic component of membrane (GO:0031224);; Molecular Function: purine ribonucleoside binding (GO:0032550);; Cellular Component: microbody (GO:0042579);;	K01904|0|osa:9272068|4-coumarate--CoA ligase-like 2	Ubiquinone and other terpenoid-quinone biosynthesis (ko00130);; Phenylpropanoid biosynthesis (ko00940)	4-coumarate--CoA ligase-like 2 [Oryza sativa Japonica Group]
Os08g0469700	0.0200687	-1.08935	down	Biological Process: phosphate-containing compound metabolic process (GO:0006796);; Molecular Function: transferase activity, transferring phosphorus-containing groups (GO:0016772);; Cellular Component: intrinsic component of membrane (GO:0031224);;	--	--	Os08g0469700, partial [Oryza sativa Japonica Group]
Os11g0131900	0.0316697	1.21744	up	Molecular Function: hydrolase activity, hydrolyzing O-glycosyl compounds (GO:0004553);; Biological Process: arabinose metabolic process (GO:0019566);;	--	--	alpha-L-arabinofuranosidase 1 isoform X2 [Oryza sativa Japonica Group]
Os11g0143400	0.0271527	2.32429	up	Molecular Function: nucleic acid binding (GO:0003676);; Biological Process: gene expression (GO:0010467);; Molecular Function: 5'-3' RNA polymerase activity (GO:0034062);; Cellular Component: intracellular membrane-bounded organelle (GO:0043231);;	K03013|1.20554e-150|osa:4349748|DNA-directed RNA polymerase V subunit 5A	RNA polymerase (ko03020)	DNA-directed RNA polymerase V subunit 5A [Oryza sativa Japonica Group]
Os01g0975900	0.022488	-1.0818	down	--	K09873|8.07294e-153|osa:4324303|probable aquaporin TIP1-2	--	probable aquaporin TIP1-2 [Oryza sativa Japonica Group]
Os04g0453400	2.65e-05	-1.88071	down	Biological Process: hydrogen transport (GO:0006818);; Biological Process: glucose transport (GO:0015758);; Molecular Function: substrate-specific transmembrane transporter activity (GO:0022891);; Cellular Component: intrinsic component of membrane (GO:0031224);;	--	--	Os04g0453400 [Oryza sativa Japonica Group]
Os02g0132500	0.027095	-1.55784	down	Molecular Function: nucleic acid binding transcription factor activity (GO:0001071);; Molecular Function: DNA binding (GO:0003677);; Biological Process: transcription, DNA-templated (GO:0006351);; Cellular Component: intracellular membrane-bounded organelle (GO:0043231);;	--	--	bZIP transcription factor 11 [Oryza sativa Japonica Group]
Os07g0662800	0.0213827	-1.51893	down	Biological Process: amino acid transport (GO:0006865);; Cellular Component: plastid inner membrane (GO:0009528);; Cellular Component: intrinsic component of membrane (GO:0031224);;	K03834|0|osa:4344191|tyrosine-specific transport protein 2 isoform X1	--	uncharacterized protein LOC4344191 isoform X1 [Oryza sativa Japonica Group]
Os12g0145150	0.0129212	-1.60672	down	--	--	--	stem-specific protein TSJT1 [Oryza sativa Japonica Group]
Os06g0208100	0.0125771	-1.21551	down	--	--	--	GL2-type homeodomain protein, partial [Oryza sativa Japonica Group]
Os06g0274200	0.027109	1.69056	up	--	K11129|1.26963e-100|osa:4340741|H/ACA ribonucleoprotein complex subunit 2-like protein	Ribosome biogenesis in eukaryotes (ko03008)	H/ACA ribonucleoprotein complex subunit 2-like protein [Oryza sativa Japonica Group]
Os04g0550200	0.0452712	-2.32596	down	Molecular Function: nucleic acid binding transcription factor activity (GO:0001071);; Molecular Function: nucleic acid binding (GO:0003676);; Biological Process: transcription, DNA-templated (GO:0006351);; Cellular Component: intracellular membrane-bounded organelle (GO:0043231);;	--	--	ethylene-responsive transcription factor ERF038 [Oryza sativa Japonica Group]
Os10g0456800	0.00111251	2.36846	up	--	K10144|0|osa:4348796|E3 ubiquitin-protein ligase MIEL1 isoform X1	Ubiquitin mediated proteolysis (ko04120)	E3 ubiquitin-protein ligase RZFP34 isoform X1 [Oryza sativa Japonica Group]
Os01g0635550	0.0052635	-1.32294	down	--	--	--	zinc-finger homeodomain protein 5 [Oryza sativa Japonica Group]
Os01g0152000	9.44e-06	-2.55521	down	Molecular Function: protein kinase activity (GO:0004672);; Biological Process: cellular protein modification process (GO:0006464);; Biological Process: phosphate-containing compound metabolic process (GO:0006796);; Cellular Component: intrinsic component of membrane (GO:0031224);; Molecular Function: purine ribonucleoside binding (GO:0032550);;	--	--	putative receptor-like protein kinase At3g47110 [Oryza sativa Japonica Group]
Os12g0145100	0.000400335	-1.84296	down	--	--	--	stem-specific protein TSJT1 [Oryza sativa Japonica Group]
Os10g0523700	0.00398203	-1.46526	down	Biological Process: L-phenylalanine metabolic process (GO:0006558);; Molecular Function: hydro-lyase activity (GO:0016836);;	K05359|0|osa:4349157|arogenate dehydratase/prephenate dehydratase 6, chloroplastic	Phenylalanine, tyrosine and tryptophan biosynthesis (ko00400);; Biosynthesis of amino acids (ko01230)	arogenate dehydratase/prephenate dehydratase 6, chloroplastic [Oryza sativa Japonica Group]
Os06g0655500	0.0324866	-1.14436	down	Biological Process: phototransduction (GO:0007602);; Cellular Component: intrinsic component of membrane (GO:0031224);;	--	--	F-box protein AFR [Oryza sativa Japonica Group]
Os11g0152500	2.47e-08	6.4331	up	Molecular Function: phospholipid binding (GO:0005543);; Biological Process: regulation of timing of meristematic phase transition (GO:0048506);; Biological Process: reproductive shoot system development (GO:0090567);;	--	--	CEN-like protein 2 [Oryza sativa Japonica Group]
Os03g0326200	0.00532411	3.74552	up	--	--	--	Os03g0326200, partial [Oryza sativa Japonica Group]
Os02g0175600	0.00322536	1.20457	up	--	K02900|1.23516e-78|osa:4328472|60S ribosomal protein L27a-3	Ribosome (ko03010)	60S ribosomal protein L27a-3 [Oryza sativa Japonica Group]
Os02g0663100	0.023585	-1.4623	down	--	--	--	scarecrow-like protein 6 [Oryza sativa Japonica Group]
Os07g0666600	0.0181022	1.31148	up	Cellular Component: nuclear envelope (GO:0005635);; Molecular Function: cytoskeletal protein binding (GO:0008092);; Cellular Component: vacuolar part (GO:0044437);;	--	--	protein NETWORKED 3A [Oryza sativa Japonica Group]
Os10g0517500	0.00315098	2.75205	up	Cellular Component: cytoplasm (GO:0005737);; Molecular Function: carbon-sulfur lyase activity (GO:0016846);; Molecular Function: anion binding (GO:0043168);; Biological Process: protein homooligomerization (GO:0051260);;	K01761|0|osa:4349123|methionine gamma-lyase	Cysteine and methionine metabolism (ko00270);; Selenocompound metabolism (ko00450)	methionine gamma-lyase [Oryza sativa Japonica Group]
Os02g0628600	0.00506858	-1.63707	down	Molecular Function: nucleic acid binding (GO:0003676);; Biological Process: transcription, DNA-templated (GO:0006351);; Biological Process: hormone-mediated signaling pathway (GO:0009755);; Cellular Component: intracellular membrane-bounded organelle (GO:0043231);;	--	--	auxin response factor 8 [Oryza sativa Japonica Group]
Os09g0275400	0.00111073	-4.43715	down	--	--	--	premnaspirodiene oxygenase [Oryza sativa Japonica Group]
Os06g0486800	0.00372608	2.77194	up	--	K00122|0|osa:4341069|formate dehydrogenase 1, mitochondrial	Glyoxylate and dicarboxylate metabolism (ko00630);; Carbon metabolism (ko01200)	formate dehydrogenase 1, mitochondrial [Oryza sativa Japonica Group]
Os01g0757500	0.000256972	1.38783	up	--	--	--	calcyclin-binding protein [Oryza sativa Japonica Group]
Os01g0951200	0.00260773	1.23497	up	--	K13421|0|osa:4325739|uridine 5'-monophosphate synthase	Pyrimidine metabolism (ko00240);; Biosynthesis of cofactors (ko01240)	uridine 5&apos;-monophosphate synthase [Oryza sativa Japonica Group]
Os12g0182700	0.0153662	-1.4614	down	Biological Process: protein deacetylation (GO:0006476);; Cellular Component: plastid (GO:0009536);; Molecular Function: tubulin binding (GO:0015631);; Molecular Function: hydrolase activity, acting on carbon-nitrogen (but not peptide) bonds, in linear amides (GO:0016811);; Molecular Function: protein phosphatase binding (GO:0019903);;	--	--	histone deacetylase 14 isoform X1 [Oryza sativa Japonica Group]
Os03g0326500	0.00998952	1.76916	up	--	--	--	Os03g0326500, partial [Oryza sativa Japonica Group]
Os06g0185900	0.047385	-1.04547	down	Molecular Function: peroxidase activity (GO:0004601);; Biological Process: response to stress (GO:0006950);; Cellular Component: intracellular membrane-bounded organelle (GO:0043231);; Biological Process: single-organism metabolic process (GO:0044710);; Biological Process: cellular detoxification (GO:1990748);;	K00432|1.37044e-131|osa:4340341|probable phospholipid hydroperoxide glutathione peroxidase	Glutathione metabolism (ko00480);; Arachidonic acid metabolism (ko00590)	probable phospholipid hydroperoxide glutathione peroxidase [Oryza sativa Japonica Group]
Os10g0344000	0.00671731	-1.61499	down	Molecular Function: secondary active transmembrane transporter activity (GO:0015291);; Biological Process: drug transport (GO:0015893);; Cellular Component: intrinsic component of membrane (GO:0031224);;	K03327|0|osa:9271191|protein DETOXIFICATION 16	--	hypothetical protein OsI_33154 [Oryza sativa Indica Group]
Os06g0172600	0.00409214	1.79571	up	--	K02983|1.10003e-26|bvg:104889711|40S ribosomal protein S30	Ribosome (ko03010)	PREDICTED: 40S ribosomal protein S30 [Beta vulgaris subsp. vulgaris]
Os03g0185500	0.0286891	2.02954	up	--	K23504|0|osa:4331865|uncharacterized protein LOC4331865	--	uncharacterized protein LOC4331865 [Oryza sativa Japonica Group]
Os01g0663051	2.73e-05	-4.24637	down	Molecular Function: nucleic acid binding (GO:0003676);; Cellular Component: intracellular membrane-bounded organelle (GO:0043231);;	--	--	hypothetical protein OsI_03155 [Oryza sativa Indica Group]
Os12g0181533	3.14e-05	-1.91786	down	--	--	--	amino acid permease 3 [Oryza sativa Japonica Group]
Os11g0591000	0.000208133	4.33634	up	Molecular Function: purine ribonucleoside binding (GO:0032550);; Cellular Component: intracellular membrane-bounded organelle (GO:0043231);;	--	--	Os11g0591000, partial [Oryza sativa Japonica Group]
Os08g0476000	0.0230568	1.25303	up	--	--	--	uncharacterized protein LOC9267781 isoform X5 [Oryza sativa Japonica Group]
Os01g0702700	0.00291386	-2.22497	down	--	K09422|0|osa:4324241|myb-related protein Hv33	--	myb-related protein Hv33 [Oryza sativa Japonica Group]
Os02g0764500	0.0286891	-1.27587	down	--	K08911|1.75651e-171|osa:4330828|chlorophyll a-b binding protein 4, chloroplastic	Photosynthesis - antenna proteins (ko00196)	photosystem I chlorophyll a/b-binding protein 5, chloroplastic [Oryza sativa Japonica Group]
Os07g0491900	0.0171475	-1.76374	down	--	--	--	monooxygenase 2 isoform X1 [Oryza sativa Japonica Group]
Os11g0525600	7.9e-09	2.34335	up	--	K01191|0|osa:4350617|alpha-mannosidase isoform X1	Other glycan degradation (ko00511)	probable alpha-mannosidase At5g13980 isoform X1 [Oryza sativa Japonica Group]
xxx_newGene_3677	0.00103975	-1.97278	down	Molecular Function: nucleic acid binding (GO:0003676);; Biological Process: transcription, DNA-templated (GO:0006351);; Cellular Component: intracellular membrane-bounded organelle (GO:0043231);;	K09422|3.758e-111|osa:107280253|myb-related protein P-like	--	myb-related protein P [Oryza sativa Japonica Group]
Os01g0127400	4.68e-06	2.86047	up	Molecular Function: nucleic acid binding (GO:0003676);; Cellular Component: intracellular membrane-bounded organelle (GO:0043231);;	--	--	Os01g0127400 [Oryza sativa Japonica Group]
Os03g0776900	0.024927	1.92745	up	Cellular Component: intrinsic component of membrane (GO:0031224);; Cellular Component: intracellular membrane-bounded organelle (GO:0043231);;	--	--	Os03g0776900, partial [Oryza sativa Japonica Group]
Os02g0612900	0.000991843	2.4426	up	Cellular Component: cell-cell junction (GO:0005911);; Biological Process: hyperosmotic response (GO:0006972);; Biological Process: response to radiation (GO:0009314);; Biological Process: response to hormone (GO:0009725);; Cellular Component: membrane (GO:0016020);; Cellular Component: vacuolar part (GO:0044437);; Biological Process: establishment of localization (GO:0051234);;	K03098|4.66597e-133|osa:4329967|temperature-induced lipocalin-1	--	temperature-induced lipocalin-1 [Oryza sativa Japonica Group]
Os10g0504600	0.0440789	-1.899	down	Cellular Component: intracellular membrane-bounded organelle (GO:0043231);;	--	--	putative myosin [Oryza sativa Japonica Group]
Os03g0823000	0.00599365	-3.56186	down	Molecular Function: protein kinase activity (GO:0004672);; Biological Process: cellular protein modification process (GO:0006464);; Biological Process: phosphate-containing compound metabolic process (GO:0006796);; Cellular Component: intrinsic component of membrane (GO:0031224);; Molecular Function: purine ribonucleoside binding (GO:0032550);; Cellular Component: intracellular membrane-bounded o…	--	--	L-type lectin-domain containing receptor kinase IV.1 [Oryza sativa Japonica Group]
Os07g0110200	0.0204913	1.34913	up	Biological Process: ribonucleoprotein complex biogenesis (GO:0022613);; Cellular Component: nuclear lumen (GO:0031981);; Molecular Function: purine ribonucleoside binding (GO:0032550);;	--	--	Os07g0110200, partial [Oryza sativa Japonica Group]
Os12g0270300	0.00060249	-1.40016	down	Molecular Function: purine ribonucleoside binding (GO:0032550);;	--	--	disease resistance protein RGA5-like [Oryza sativa Japonica Group]
Os12g0637200	0.0324866	-1.61378	down	Biological Process: phosphate-containing compound metabolic process (GO:0006796);; Molecular Function: phosphatase activity (GO:0016791);; Molecular Function: cation binding (GO:0043169);; Cellular Component: intracellular membrane-bounded organelle (GO:0043231);;	--	--	hypothetical protein OsI_39269 [Oryza sativa Indica Group]
Os02g0532500	0.0291167	1.86679	up	--	--	--	germin-like protein 2-4 [Oryza sativa Japonica Group]
Os07g0674700	0.0359388	1.09294	up	--	K02883|1.74253e-137|osa:4344265|60S ribosomal protein L18-3 isoform X1	Ribosome (ko03010)	60S ribosomal protein L18-3 isoform X1 [Oryza sativa Japonica Group]
Os03g0174900	0.020144	1.19	up	Molecular Function: nucleic acid binding transcription factor activity (GO:0001071);; Molecular Function: nucleic acid binding (GO:0003676);; Biological Process: transcription, DNA-templated (GO:0006351);; Molecular Function: acetyltransferase activity (GO:0016407);; Cellular Component: RNA polymerase II transcription factor complex (GO:0090575);;	--	--	CCAAT-binding transcription factor subunit B family protein, expressed [Oryza sativa Japonica Group]
Os05g0430200	0.0484829	1.13235	up	Biological Process: phosphate-containing compound metabolic process (GO:0006796);; Molecular Function: transferase activity, transferring phosphorus-containing groups (GO:0016772);;	--	--	Os05g0430200, partial [Oryza sativa Japonica Group]
Os03g0645900	0.0249437	2.35258	up	Cellular Component: plastid stroma (GO:0009532);; Biological Process: abscisic acid metabolic process (GO:0009687);; Molecular Function: carotenoid dioxygenase activity (GO:0010436);; Molecular Function: cation binding (GO:0043169);;	K09840|0|osa:4333566|9-cis-epoxycarotenoid dioxygenase 1, chloroplastic	Carotenoid biosynthesis (ko00906)	9-cis-epoxycarotenoid dioxygenase NCED3, chloroplastic [Oryza sativa Japonica Group]
Os02g0302200	0.0226954	1.20441	up	--	--	--	tyrosine aminotransferase isoform X2 [Oryza sativa Japonica Group]
Os02g0753300	0.0036658	2.56731	up	--	--	--	PLAT domain-containing protein 3 [Oryza sativa Japonica Group]
Os02g0817700	0.0423179	1.59272	up	Molecular Function: transferase activity, transferring acyl groups (GO:0016746);;	K07513|0|osa:4331150|3-ketoacyl-CoA thiolase 2, peroxisomal	Fatty acid degradation (ko00071);; Valine, leucine and isoleucine degradation (ko00280);; alpha-Linolenic acid metabolism (ko00592);; Biosynthesis of unsaturated fatty acids (ko01040);; Fatty acid metabolism (ko01212);; Peroxisome (ko04146)	3-ketoacyl-CoA thiolase 2, peroxisomal [Oryza sativa Japonica Group]
Os03g0154700	0.01455	1.20893	up	--	K02997|2.60278e-128|osa:4331662|40S ribosomal protein S9-2	Ribosome (ko03010)	40S ribosomal protein S9-2 [Oryza sativa Japonica Group]
Os01g0658900	2.71e-09	2.70114	up	--	K09060|0|osa:4327165|common plant regulatory factor 1 isoform X1	--	common plant regulatory factor 1 isoform X1 [Oryza sativa Japonica Group]
Os03g0339900	0.00575569	-1.80316	down	--	K07198|0|osa:4332786|CBL-interacting protein kinase 10 isoform X1	--	CBL-interacting protein kinase 10 isoform X1 [Oryza sativa Japonica Group]
Os10g0555700	0.00868879	-3.46002	down	Biological Process: reproduction (GO:0000003);; Cellular Component: external encapsulating structure (GO:0030312);; Biological Process: external encapsulating structure organization (GO:0045229);;	--	--	expansin-B2 [Oryza sativa Japonica Group]
Os03g0645966	0.0378804	2.16484	up	Cellular Component: plastid stroma (GO:0009532);; Biological Process: abscisic acid metabolic process (GO:0009687);; Molecular Function: carotenoid dioxygenase activity (GO:0010436);; Molecular Function: cation binding (GO:0043169);;	K09840|0|osa:4333566|9-cis-epoxycarotenoid dioxygenase 1, chloroplastic	Carotenoid biosynthesis (ko00906)	9-cis-epoxycarotenoid dioxygenase NCED3, chloroplastic [Oryza sativa Japonica Group]
Os09g0516600	0.0221798	-1.07765	down	Molecular Function: thiolester hydrolase activity (GO:0016790);; Cellular Component: intrinsic component of membrane (GO:0031224);; Biological Process: methylglyoxal catabolic process to lactate (GO:0061727);;	K01069|0|osa:4347581|probable hydroxyacylglutathione hydrolase 2, chloroplastic	Pyruvate metabolism (ko00620)	probable hydroxyacylglutathione hydrolase 2, chloroplastic [Oryza sativa Japonica Group]
Os09g0568800	0.0183788	1.53101	up	Cellular Component: intracellular ribonucleoprotein complex (GO:0030529);;	K02975|4.20584e-45|osa:4347899|40S ribosomal protein S25-2	Ribosome (ko03010)	40S ribosomal protein S25-2 [Oryza sativa Japonica Group]
Os08g0391700	0.04505	-1.1378	down	--	--	--	Os08g0391700, partial [Oryza sativa Japonica Group]
Os01g0363500	0.0337655	1.22803	up	Biological Process: thiamine metabolic process (GO:0006772);; Biological Process: phosphate-containing compound metabolic process (GO:0006796);; Biological Process: pyrimidine-containing compound salvage (GO:0008655);; Molecular Function: kinase activity (GO:0016301);; Molecular Function: small molecule binding (GO:0036094);; Molecular Function: ion binding (GO:0043167);; Cellular Component: intr…	K00878|6.67405e-55|osa:9269112|hydroxyethylthiazole kinase	Thiamine metabolism (ko00730);; Biosynthesis of cofactors (ko01240)	Os01g0363500, partial [Oryza sativa Japonica Group]
Os01g0704100	7.9e-09	-3.14898	down	--	--	--	membrane transporter-like [Oryza sativa Japonica Group]
Os04g0517500	0.00427943	2.81299	up	--	--	--	phosphoenolpyruvate carboxylase kinase [Oryza sativa Japonica Group]
Os03g0385400	0.000588187	1.52082	up	Molecular Function: binding (GO:0005488);; Biological Process: lipid localization (GO:0010876);; Molecular Function: hydrolase activity (GO:0016787);; Biological Process: protein metabolic process (GO:0019538);; Cellular Component: cytoplasmic vesicle membrane (GO:0030659);; Cellular Component: intrinsic component of membrane (GO:0031224);; Cellular Component: intracellular membrane-bounded organ…	--	--	non-specific lipid transfer protein-like 1 isoform X2 [Oryza sativa Japonica Group]
Os01g0606050	0.0431763	2.16653	up	Cellular Component: intrinsic component of membrane (GO:0031224);;	--	--	uncharacterized protein LOC9268014 [Oryza sativa Japonica Group]
Os07g0162700	0.00655972	-1.7522	down	--	--	--	probable carboxylesterase 15 [Oryza sativa Japonica Group]
Os10g0364900	2.92e-08	7.07076	up	--	--	--	Os10g0364900 [Oryza sativa Japonica Group]
Os02g0661900	0.0492049	-1.08408	down	Cellular Component: intrinsic component of membrane (GO:0031224);;	--	--	vesicle-associated protein 1-3-like isoform X1 [Oryza sativa Japonica Group]
Os12g0406200	0.000184943	1.41098	up	--	K02984|6.86622e-176|osa:4352048|40S ribosomal protein S3a-like	Ribosome (ko03010)	40S ribosomal protein S3a-like [Oryza sativa Japonica Group]
Os09g0441700	0.00076213	-1.78941	down	--	--	--	Os09g0441700 [Oryza sativa Japonica Group]
Os05g0344200	1.38e-05	4.73801	up	--	--	--	hypothetical protein OsI_19536 [Oryza sativa Indica Group]
Os02g0575200	0.00640997	-1.93852	down	--	K01922|0|osa:4329749|phosphopantothenate--cysteine ligase 1	Pantothenate and CoA biosynthesis (ko00770);; Biosynthesis of cofactors (ko01240)	phosphopantothenate--cysteine ligase 1 [Oryza sativa Japonica Group]
Os12g0151500	0.00118894	-2.25708	down	Biological Process: protein glycosylation (GO:0006486);; Biological Process: transport (GO:0006810);; Molecular Function: transferase activity, transferring glycosyl groups (GO:0016757);; Cellular Component: intrinsic component of membrane (GO:0031224);; Cellular Component: Golgi apparatus part (GO:0044431);;	--	--	sialyltransferase-like protein 2 [Oryza sativa Japonica Group]
Os09g0482860	0.002191	-1.58782	down	--	--	--	hypothetical protein OsI_31813 [Oryza sativa Indica Group]
Os09g0567800	0.00185731	1.95836	up	Molecular Function: hydrolase activity (GO:0016787);; Cellular Component: intrinsic component of membrane (GO:0031224);;	--	--	Os09g0567800 [Oryza sativa Japonica Group]
Os01g0513400	0.0250779	2.59121	up	--	--	--	uncharacterized protein LOC4323985 [Oryza sativa Japonica Group]
Os07g0693000	0.00944017	-1.9302	down	--	--	--	protein MALE DISCOVERER 2 [Oryza sativa Japonica Group]
Os06g0554600	0.0283017	-1.50901	down	Cellular Component: intracellular membrane-bounded organelle (GO:0043231);;	--	--	uncharacterized protein LOC4341279 [Oryza sativa Japonica Group]
Os06g0606700	0.00436404	-1.98309	down	--	--	--	uncharacterized protein LOC4341478 [Oryza sativa Japonica Group]
Os01g0134900	9.98e-06	3.84583	up	Biological Process: polysaccharide catabolic process (GO:0000272);; Molecular Function: hydrolase activity, acting on glycosyl bonds (GO:0016798);;	--	--	uncharacterized protein LOC4325690 [Oryza sativa Japonica Group]
Os09g0487200	0.0438628	-1.55941	down	--	--	--	uncharacterized protein LOC4347426 isoform X1 [Oryza sativa Japonica Group]
Os08g0470200	0.0118378	2.69693	up	Molecular Function: hydro-lyase activity (GO:0016836);; Biological Process: cellular metabolic process (GO:0044237);; Molecular Function: transition metal ion binding (GO:0046914);;	K01674|0|osa:9268297|alpha carbonic anhydrase 7	Nitrogen metabolism (ko00910)	alpha carbonic anhydrase 7 [Oryza sativa Japonica Group]
Os01g0843800	1.92e-14	8.50431	up	--	--	--	LOW QUALITY PROTEIN: putative laccase-5 [Oryza sativa Japonica Group]
Os07g0119800	6.92e-09	9.61517	up	--	--	--	uncharacterized protein LOC4342272 [Oryza sativa Japonica Group]
Os10g0177200	0.0256779	3.70715	up	Molecular Function: metal ion binding (GO:0046872);;	--	--	uncharacterized protein LOC4348196 [Oryza sativa Japonica Group]
Os12g0588900	0.0205814	1.05234	up	Biological Process: tRNA wobble base modification (GO:0002097);; Molecular Function: RNA binding (GO:0003723);; Biological Process: post-embryonic development (GO:0009791);; Molecular Function: transferase activity, transferring phosphorus-containing groups (GO:0016772);; Molecular Function: transferase activity, transferring sulfur-containing groups (GO:0016782);; Biological Process: protein mod…	--	--	Os12g0588900, partial [Oryza sativa Japonica Group]
Os06g0172200	0.0303883	-1.17282	down	--	--	--	probable calcium-binding protein CML30 [Oryza sativa Japonica Group]
Os03g0809400	0.0379987	2.02062	up	Cellular Component: intrinsic component of membrane (GO:0031224);;	--	--	Os03g0809400 [Oryza sativa Japonica Group]
Os06g0172800	0.0237567	2.72277	up	--	--	--	Os06g0172800, partial [Oryza sativa Japonica Group]
Os08g0485400	0.00750827	1.82967	up	Cellular Component: cytoplasm (GO:0005737);; Molecular Function: oxidoreductase activity, acting on single donors with incorporation of molecular oxygen, incorporation of one atom of oxygen (internal monooxygenases or internal mixed function oxidases) (GO:0016703);; Biological Process: single-organism metabolic process (GO:0044710);;	--	--	Os08g0485400 [Oryza sativa Japonica Group]
Os03g0719000	1.31e-07	-5.09081	down	Biological Process: microtubule-based process (GO:0007017);; Molecular Function: tubulin binding (GO:0015631);; Biological Process: cell cycle process (GO:0022402);;	K16732|0|osa:4333924|65-kDa microtubule-associated protein 6	--	putative microtubule-associated protein [Oryza sativa Japonica Group]
Os10g0447900	0.0216135	-1.03724	down	--	--	--	silicon efflux transporter LSI2-like [Oryza sativa Japonica Group]
Os07g0637000	0.00199595	-1.8184	down	--	K07198|0|osa:4344036|CBL-interacting protein kinase 21	--	CBL-interacting protein kinase 21 [Oryza sativa Japonica Group]
Os07g0175600	0.00110479	4.54883	up	Molecular Function: binding (GO:0005488);; Biological Process: lipid localization (GO:0010876);; Molecular Function: hydrolase activity (GO:0016787);; Biological Process: protein metabolic process (GO:0019538);;	--	--	non-specific lipid-transfer protein-like protein At2g13820 [Oryza sativa Japonica Group]
Os04g0585700	9.86e-06	-1.95834	down	--	--	--	uncharacterized protein LOC4336793 [Oryza sativa Japonica Group]
Os06g0701400	0.0002467	1.5293	up	--	K02942|1.72077e-23|osa:4341969|60S acidic ribosomal protein P3	Ribosome (ko03010)	60S acidic ribosomal protein P3 [Oryza sativa Japonica Group]
Os07g0529000	5.32e-08	8.4566	up	--	K01637|0|osa:4343441|isocitrate lyase	Glyoxylate and dicarboxylate metabolism (ko00630);; Carbon metabolism (ko01200)	isocitrate lyase [Oryza sativa Japonica Group]
Os02g0314300	5.95e-05	-2.38706	down	--	K07300|0|osa:9269067|vacuolar cation/proton exchanger 1c isoform X1	--	vacuolar cation/proton exchanger 1c isoform X1 [Oryza sativa Japonica Group]
Os08g0425500	0.0029384	2.38203	up	--	--	--	type IV inositol polyphosphate 5-phosphatase 9 [Oryza sativa Japonica Group]
Os07g0187700	0.00551783	2.72876	up	Biological Process: inorganic anion transport (GO:0015698);; Cellular Component: intrinsic component of membrane (GO:0031224);; Cellular Component: intracellular membrane-bounded organelle (GO:0043231);; Biological Process: intracellular transport (GO:0046907);;	K14003|0|osa:4342601|SEC12-like protein 1	Protein processing in endoplasmic reticulum (ko04141)	SEC12-like protein 1 [Oryza sativa Japonica Group]
Os05g0171900	0.000518098	4.78283	up	--	--	--	Os05g0171900 [Oryza sativa Japonica Group]
Os03g0728900	0.00267345	-2.09125	down	--	--	--	transcription factor bHLH74 [Oryza sativa Japonica Group]
Os03g0673000	0.0231148	-1.73162	down	Molecular Function: DNA binding (GO:0003677);; Biological Process: transcription, DNA-templated (GO:0006351);; Cellular Component: intracellular membrane-bounded organelle (GO:0043231);;	--	--	putative homeobox, 5&apos;-partial, partial [Oryza sativa Japonica Group]
Os03g0399900	0.0055431	-1.67372	down	Cellular Component: intracellular membrane-bounded organelle (GO:0043231);;	--	--	hypothetical protein EE612_017926, partial [Oryza sativa]
Os08g0412800	0.00291106	4.4805	up	--	--	--	uncharacterized protein LOC4345562 [Oryza sativa Japonica Group]
Os03g0221700	0.0344792	-2.30193	down	Molecular Function: protein kinase activity (GO:0004672);; Biological Process: cellular protein modification process (GO:0006464);; Biological Process: phosphate-containing compound metabolic process (GO:0006796);; Biological Process: cell recognition (GO:0008037);; Cellular Component: intrinsic component of membrane (GO:0031224);; Molecular Function: purine ribonucleoside binding (GO:0032550);;	--	--	G-type lectin S-receptor-like serine/threonine-protein kinase At2g19130 [Oryza sativa Japonica Group]
Os03g0146400	0.0492123	1.01107	up	--	K13071|0|osa:4331611|pheophorbide a oxygenase, chloroplastic	Porphyrin and chlorophyll metabolism (ko00860)	pheophorbide a oxygenase, chloroplastic [Oryza sativa Japonica Group]
Os06g0225300	0.0241993	-2.47386	down	Molecular Function: protein kinase activity (GO:0004672);; Biological Process: cellular protein modification process (GO:0006464);; Biological Process: phosphate-containing compound metabolic process (GO:0006796);; Cellular Component: intrinsic component of membrane (GO:0031224);; Molecular Function: purine ribonucleoside binding (GO:0032550);;	K13418|0|osa:4340544|somatic embryogenesis receptor kinase 2	--	LRR receptor kinase SERK2-like [Oryza sativa Japonica Group]
Os02g0162600	2.71e-09	5.82351	up	--	--	--	uncharacterized protein LOC4328393 [Oryza sativa Japonica Group]
Os04g0405100	0.0379736	1.53709	up	--	--	--	chloroplastic import inner membrane translocase subunit HP30-2 [Oryza sativa Japonica Group]
Os11g0621300	0.0204913	3.03765	up	--	--	--	glycine-rich domain-containing protein 1 [Oryza sativa Japonica Group]
Os03g0214200	0.0280226	2.20979	up	Biological Process: cell communication (GO:0007154);; Cellular Component: intracellular membrane-bounded organelle (GO:0043231);;	--	--	Os03g0214200 [Oryza sativa Japonica Group]
Os01g0110200	0.00304546	2.68773	up	Cellular Component: intracellular membrane-bounded organelle (GO:0043231);;	--	--	unnamed protein product [Oryza sativa Japonica Group]
Os01g0835500	0.000408459	-1.66896	down	Biological Process: generation of precursor metabolites and energy (GO:0006091);; Molecular Function: antioxidant activity (GO:0016209);; Molecular Function: oxidoreductase activity, acting on NAD(P)H (GO:0016651);; Cellular Component: intrinsic component of membrane (GO:0031224);; Biological Process: single-organism metabolic process (GO:0044710);; Molecular Function: metal ion binding (GO:00468…	--	--	putative respiratory burst oxidase homolog protein H [Oryza sativa Japonica Group]
Os01g0556650	0.0125481	-1.65013	down	Biological Process: peptide transport (GO:0015833);; Cellular Component: intrinsic component of membrane (GO:0031224);;	--	--	protein NRT1/ PTR FAMILY 6.2 isoform X1 [Oryza sativa Japonica Group]
Os01g0719100	0.000193048	2.26787	up	Molecular Function: transition metal ion binding (GO:0046914);;	--	--	Os01g0719100, partial [Oryza sativa Japonica Group]
Os03g0130700	0.000670261	1.41448	up	Biological Process: phosphate-containing compound metabolic process (GO:0006796);; Molecular Function: transferase activity (GO:0016740);; Molecular Function: phosphatase activity (GO:0016791);; Cellular Component: intracellular membrane-bounded organelle (GO:0043231);; Cellular Component: cytoplasmic part (GO:0044444);;	--	--	expressed protein [Oryza sativa Japonica Group]
Os03g0834000	0.0423783	1.07107	up	Molecular Function: nucleic acid binding (GO:0003676);; Molecular Function: exonuclease activity (GO:0004527);; Biological Process: DNA repair (GO:0006281);; Molecular Function: endodeoxyribonuclease activity, producing 5'-phosphomonoesters (GO:0016888);; Cellular Component: nuclear lumen (GO:0031981);; Molecular Function: metal ion binding (GO:0046872);;	K04799|1.64483e-166|osa:4334691|flap endonuclease 1-B	DNA replication (ko03030);; Base excision repair (ko03410);; Non-homologous end-joining (ko03450)	Os03g0834000 [Oryza sativa Japonica Group]
Os11g0180900	2.26e-05	-2.05898	down	Molecular Function: nucleic acid binding (GO:0003676);;	K09422|1.59652e-150|osa:4349938|myb-related protein 308	--	myb-related protein 308 [Oryza sativa Japonica Group]
Os10g0422600	0.0145412	2.66015	up	--	--	--	Os10g0422600, partial [Oryza sativa Japonica Group]
xxx_newGene_3298	0.0244228	6.47146	up	--	K00430|0|osa:107280449|peroxidase 5-like	Phenylpropanoid biosynthesis (ko00940)	peroxidase 5-like [Oryza sativa Japonica Group]
Os02g0222000	0.000418666	-2.02898	down	Molecular Function: oxidoreductase activity (GO:0016491);; Cellular Component: intrinsic component of membrane (GO:0031224);; Biological Process: single-organism metabolic process (GO:0044710);; Molecular Function: tetrapyrrole binding (GO:0046906);; Molecular Function: transition metal ion binding (GO:0046914);;	K20771|0|osa:4328761|cytochrome P450 711A1	--	hypothetical protein EE612_009842 [Oryza sativa]
Os02g0622500	8.04e-05	2.96352	up	Molecular Function: small molecule binding (GO:0036094);; Molecular Function: organic cyclic compound binding (GO:0097159);;	--	--	Os02g0622500, partial [Oryza sativa Japonica Group]
Os09g0344800	0.00499742	-1.65613	down	Cellular Component: intrinsic component of membrane (GO:0031224);;	--	--	hypothetical protein OsJ_28979 [Oryza sativa Japonica Group]
Os05g0495700	0.000139996	6.72249	up	Molecular Function: nucleotide binding (GO:0000166);; Biological Process: glycerol-3-phosphate metabolic process (GO:0006072);; Molecular Function: oxidoreductase activity, acting on the CH-OH group of donors, NAD or NADP as acceptor (GO:0016616);; Biological Process: primary metabolic process (GO:0044238);; Cellular Component: cytoplasmic part (GO:0044444);; Biological Process: single-organism m…	K00006|2.12789e-126|osa:4339200|probable glycerol-3-phosphate dehydrogenase [NAD(+)] 3, cytosolic	Glycerophospholipid metabolism (ko00564)	Os05g0495700, partial [Oryza sativa Japonica Group]
Os11g0488900	0.0286796	-1.07366	down	Cellular Component: intrinsic component of membrane (GO:0031224);; Cellular Component: intracellular membrane-bounded organelle (GO:0043231);;	--	--	F-box protein At5g50450 [Oryza sativa Japonica Group]
Os09g0431900	2.44e-06	-2.81395	down	Molecular Function: cation binding (GO:0043169);; Cellular Component: intracellular membrane-bounded organelle (GO:0043231);;	--	--	zinc finger protein 2 [Oryza sativa Japonica Group]
Os02g0323000	0.0321072	-1.40228	down	--	K05658|0|osa:9270100|ABC transporter B family member 9 isoform X1	ABC transporters (ko02010)	ABC transporter B family member 9 [Oryza sativa Japonica Group]
Os12g0268000	0.0061547	4.0474	up	--	K20617|0|osa:4351945|cytochrome P450 71A1	Tryptophan metabolism (ko00380)	tryptamine 5-hydroxylase [Oryza sativa Japonica Group]
Os10g0415300	0.00144645	4.03093	up	Molecular Function: nucleotide binding (GO:0000166);; Biological Process: generation of precursor metabolites and energy (GO:0006091);; Biological Process: sulfur compound metabolic process (GO:0006790);; Molecular Function: glutathione disulfide oxidoreductase activity (GO:0015038);; Molecular Function: oxidoreductase activity, acting on NAD(P)H (GO:0016651);; Biological Process: cellular homeos…	K00383|0|osa:4348623|glutathione reductase, chloroplastic	Glutathione metabolism (ko00480)	hypothetical protein EE612_051444 [Oryza sativa]
Os02g0734900	0.000594653	3.71728	up	Biological Process: protein transport (GO:0015031);; Cellular Component: intrinsic component of membrane (GO:0031224);; Cellular Component: intracellular membrane-bounded organelle (GO:0043231);;	--	--	uncharacterized protein LOC4330647 [Oryza sativa Japonica Group]
Os04g0632100	0.0177671	-1.30035	down	--	--	--	G-type lectin S-receptor-like serine/threonine-protein kinase B120 [Oryza sativa Japonica Group]
Os03g0149300	0.00475606	-2.02071	down	--	--	--	WAT1-related protein At2g39510 [Oryza sativa Japonica Group]
Os01g0303800	0.00200362	2.79917	up	Biological Process: response to stimulus (GO:0050896);;	--	--	universal stress protein PHOS34 [Oryza sativa Japonica Group]
Os06g0716100	0.000498419	2.28089	up	Cellular Component: intracellular membrane-bounded organelle (GO:0043231);;	--	--	chaperone protein dnaJ 11, chloroplastic [Oryza sativa Japonica Group]
Os05g0457200	1.6e-06	2.01657	up	Molecular Function: phosphoprotein phosphatase activity (GO:0004721);; Biological Process: cellular protein modification process (GO:0006464);; Cellular Component: membrane (GO:0016020);; Molecular Function: cation binding (GO:0043169);;	K14497|5.97386e-122|osa:9270549|probable protein phosphatase 2C 49	MAPK signaling pathway - plant (ko04016);; Plant hormone signal transduction (ko04075)	hypothetical protein OsJ_18791 [Oryza sativa Japonica Group]
Os06g0218300	0.00798924	4.0066	up	Molecular Function: nucleic acid binding (GO:0003676);; Biological Process: RNA modification (GO:0009451);; Molecular Function: intramolecular transferase activity (GO:0016866);; Cellular Component: intrinsic component of membrane (GO:0031224);; Cellular Component: intracellular membrane-bounded organelle (GO:0043231);; Molecular Function: transition metal ion binding (GO:0046914);;	K10664|1.58751e-120|osa:4340502|E3 ubiquitin-protein ligase ATL31	--	E3 ubiquitin-protein ligase ATL31 [Oryza sativa Japonica Group]
Os07g0523700	0.0365461	1.50625	up	--	K02929|1.34534e-53|osa:4343415|60S ribosomal protein L44	Ribosome (ko03010)	Os07g0523100 [Oryza sativa Japonica Group]
Os01g0641700	0.0465924	-1.09313	down	Biological Process: organelle organization (GO:0006996);; Cellular Component: endomembrane system (GO:0012505);; Cellular Component: intrinsic component of membrane (GO:0031224);; Cellular Component: intracellular membrane-bounded organelle (GO:0043231);;	K20724|3.18825e-173|osa:4326558|uncharacterized protein LOC4326558	--	uncharacterized protein LOC4326558 [Oryza sativa Japonica Group]
Os04g0602500	7.04e-08	-2.50308	down	Molecular Function: catalytic activity (GO:0003824);; Cellular Component: intracellular membrane-bounded organelle (GO:0043231);;	--	--	pectin acetylesterase 7 [Oryza sativa Japonica Group]
Os05g0586200	0.00299883	-1.18077	down	Biological Process: activation of innate immune response (GO:0002218);; Biological Process: response to radiation (GO:0009314);; Biological Process: response to hormone (GO:0009725);; Molecular Function: acid-amino acid ligase activity (GO:0016881);; Biological Process: monocarboxylic acid metabolic process (GO:0032787);; Biological Process: growth (GO:0040007);; Biological Process: single-multic…	K14506|0|osa:4339756|jasmonic acid-amido synthetase JAR1	Plant hormone signal transduction (ko04075)	jasmonic acid-amido synthetase JAR1 [Oryza sativa Japonica Group]
Os02g0212500	0.040525	1.32725	up	--	--	--	uncharacterized protein LOC4328706 [Oryza sativa Japonica Group]
Os02g0514500	0.0153893	3.74847	up	--	--	--	hypothetical protein OsI_07393 [Oryza sativa Indica Group]
Os02g0705400	0.0130558	3.66854	up	Biological Process: response to stimulus (GO:0050896);;	--	--	uncharacterized protein LOC4330461 [Oryza sativa Japonica Group]
Os03g0607200	4.28e-06	3.54334	up	--	--	--	peamaclein [Oryza sativa Japonica Group]
Os08g0508700	3.64e-07	-2.92209	down	--	K14514|0|osa:4345992|ETHYLENE INSENSITIVE 3-like 3 protein	MAPK signaling pathway - plant (ko04016);; Plant hormone signal transduction (ko04075)	ETHYLENE INSENSITIVE 3-like 3 protein [Oryza sativa Japonica Group]
Os11g0661300	0.01323	-1.03237	down	--	K05863|0|osa:4351065|ADP,ATP carrier protein ER-ANT1	--	ADP,ATP carrier protein ER-ANT1 [Oryza sativa Japonica Group]
Os04g0578400	5.16e-05	-1.1334	down	Molecular Function: catalytic activity (GO:0003824);; Biological Process: fatty acid metabolic process (GO:0006631);; Cellular Component: intrinsic component of membrane (GO:0031224);; Cellular Component: intracellular membrane-bounded organelle (GO:0043231);; Molecular Function: transition metal ion binding (GO:0046914);;	K15746|3.82131e-169|osa:4336753|beta-carotene hydroxylase 2, chloroplastic	Carotenoid biosynthesis (ko00906)	beta-carotene hydroxylase 2, chloroplastic [Oryza sativa Japonica Group]
Os06g0711700	0.00456828	-1.43962	down	--	--	--	F-box/kelch-repeat protein SKIP25 [Oryza sativa Japonica Group]
Os01g0962600	0.00599365	1.4191	up	--	K02947|1.6712e-63|osa:4324553|40S ribosomal protein S10-like	Ribosome (ko03010)	PREDICTED: 40S ribosomal protein S10-like [Oryza brachyantha]
Os10g0469900	0.0110269	-1.43653	down	Cellular Component: intrinsic component of membrane (GO:0031224);; Biological Process: establishment of localization (GO:0051234);;	--	--	protein NRT1/ PTR FAMILY 5.2 [Oryza sativa Japonica Group]
Os06g0600400	0.0125481	-1.89287	down	--	K15639|0|osa:4341450|cytochrome P450 734A4	Brassinosteroid biosynthesis (ko00905)	cytochrome P450 734A4 [Oryza sativa Japonica Group]
Os07g0180900	0.000343805	1.65656	up	--	K02930|0|osa:4342563|60S ribosomal protein L4-1	Ribosome (ko03010)	Os07g0180900, partial [Oryza sativa Japonica Group]
Os01g0771200	0.00184457	1.47538	up	Cellular Component: intracellular membrane-bounded organelle (GO:0043231);;	--	--	uncharacterized protein LOC4324614 [Oryza sativa Japonica Group]
Os05g0449900	0.00119127	-1.00543	down	Molecular Function: nucleic acid binding (GO:0003676);; Biological Process: transcription, DNA-templated (GO:0006351);; Cellular Component: intracellular membrane-bounded organelle (GO:0043231);;	--	--	transcription factor DIVARICATA [Oryza sativa Japonica Group]
Os09g0115500	0.0152777	-1.56155	down	Cellular Component: intracellular membrane-bounded organelle (GO:0043231);;	--	--	CBS domain-containing protein CBSX1, chloroplastic [Oryza sativa Japonica Group]
Os02g0281000	0.0344792	-1.27452	down	Biological Process: cellular protein modification process (GO:0006464);; Cellular Component: membrane (GO:0016020);; Molecular Function: kinase activity (GO:0016301);; Molecular Function: phosphatase activity (GO:0016791);; Molecular Function: purine ribonucleoside binding (GO:0032550);; Molecular Function: cation binding (GO:0043169);;	--	--	protein phosphatase 2C and cyclic nucleotide-binding/kinase domain-containing protein isoform X2 [Oryza sativa Japonica Group]
Os07g0546700	0.00153185	1.4205	up	--	K02923|1.15944e-41|osa:4343529|60S ribosomal protein L38	Ribosome (ko03010)	60S ribosomal protein L38 [Oryza sativa Japonica Group]
Os01g0263900	0.0120054	2.55354	up	Molecular Function: nucleic acid binding (GO:0003676);; Biological Process: transcription, DNA-templated (GO:0006351);;	--	--	cyclic dof factor 2 [Oryza sativa Japonica Group]
Os11g0183900	0.0316455	3.29427	up	--	--	--	aspartic proteinase Asp1-like [Oryza sativa Japonica Group]
Os06g0314600	0.00354563	3.68421	up	--	--	--	jasmonate O-methyltransferase isoform X1 [Oryza sativa Japonica Group]
xxx_newGene_9359	2.83e-05	1.74253	up	--	K02958|1.11424e-106|osa:4342580|40S ribosomal protein S15	Ribosome (ko03010)	40S ribosomal protein S15 [Oryza sativa Japonica Group]
Os03g0327100	0.0427259	3.16826	up	Molecular Function: nucleic acid binding (GO:0003676);; Biological Process: transcription, DNA-templated (GO:0006351);; Cellular Component: intracellular membrane-bounded organelle (GO:0043231);;	--	--	NAC domain-containing protein 92 [Oryza sativa Japonica Group]
Os05g0410900	0.000180485	-1.5119	down	Cellular Component: intrinsic component of membrane (GO:0031224);; Biological Process: establishment of localization (GO:0051234);;	--	--	Os05g0410900, partial [Oryza sativa Japonica Group]
Os01g0222500	0.00473682	2.065	up	Molecular Function: hydrogen ion transmembrane transporter activity (GO:0015078);; Biological Process: energy coupled proton transmembrane transport, against electrochemical gradient (GO:0015988);; Cellular Component: proton-transporting two-sector ATPase complex (GO:0016469);;	K02150|7.32664e-144|osa:4326699|V-type proton ATPase subunit E	Oxidative phosphorylation (ko00190);; Phagosome (ko04145)	V-type proton ATPase subunit E [Oryza sativa Japonica Group]
Os08g0414700	3.82e-05	3.05288	up	Biological Process: trehalose metabolic process (GO:0005991);;	K16055|0|osa:4345573|probable alpha,alpha-trehalose-phosphate synthase [UDP-forming] 10	Starch and sucrose metabolism (ko00500)	probable alpha,alpha-trehalose-phosphate synthase [UDP-forming] 10 [Oryza sativa Japonica Group]
Os10g0371100	0.0378804	-1.61007	down	--	--	--	ethylene-responsive transcription factor RAP2-13 [Oryza sativa Japonica Group]
Os05g0572000	0.0463563	2.23642	up	Molecular Function: nucleic acid binding transcription factor activity (GO:0001071);; Molecular Function: nucleic acid binding (GO:0003676);; Biological Process: transcription, DNA-templated (GO:0006351);; Cellular Component: intracellular membrane-bounded organelle (GO:0043231);;	--	--	ethylene-responsive transcription factor ERF061 [Oryza sativa Japonica Group]
Os07g0253000	0.0233211	-1.00105	down	--	--	--	uncharacterized protein LOC4342852 [Oryza sativa Japonica Group]
Os08g0120500	0.00303032	1.88131	up	--	--	--	uncharacterized protein LOC4344544 [Oryza sativa Japonica Group]
Os01g0175100	0.0223116	2.92519	up	Cellular Component: intracellular membrane-bounded organelle (GO:0043231);;	--	--	protein THYLAKOID RHODANESE-LIKE, chloroplastic-like [Oryza sativa Japonica Group]
Os03g0597600	1.72e-22	-3.52401	down	Molecular Function: catalytic activity (GO:0003824);; Cellular Component: intrinsic component of membrane (GO:0031224);;	K13051|0|osa:4333381|isoaspartyl peptidase/L-asparaginase 1	Alanine, aspartate and glutamate metabolism (ko00250);; Cyanoamino acid metabolism (ko00460)	isoaspartyl peptidase/L-asparaginase 1 [Oryza sativa Japonica Group]
Os01g0385400	9.98e-06	6.84791	up	--	--	--	S-type anion channel SLAH2 [Oryza sativa Japonica Group]
Os03g0837850	0.0365573	-1.49407	down	--	--	--	hypothetical protein EE612_021544 [Oryza sativa]
Os05g0453300	0.0487546	-1.51343	down	--	--	--	uncharacterized protein LOC4338970 isoform X1 [Oryza sativa Japonica Group]
Os01g0191200	0.000403933	2.38348	up	Biological Process: phosphate-containing compound metabolic process (GO:0006796);; Molecular Function: phosphatase activity (GO:0016791);;	--	--	hypothetical protein OsI_00725 [Oryza sativa Indica Group]
Os02g0728300	0.000224217	-1.27009	down	--	--	--	Os02g0728300, partial [Oryza sativa Japonica Group]
Os10g0465900	0.00528213	4.03037	up	--	K01177|2.1099e-153|osa:4348840|uncharacterized protein LOC4348840	Starch and sucrose metabolism (ko00500)	Os10g0465900 [Oryza sativa Japonica Group]
Os09g0442100	0.00822197	3.3261	up	Biological Process: cellular protein modification process (GO:0006464);; Molecular Function: kinase activity (GO:0016301);; Molecular Function: purine ribonucleoside binding (GO:0032550);; Cellular Component: intracellular membrane-bounded organelle (GO:0043231);;	--	--	serine/threonine-protein kinase RIPK [Oryza sativa Japonica Group]
Os05g0176500	0.00729924	3.78317	up	Cellular Component: intracellular membrane-bounded organelle (GO:0043231);;	K18192|0|osa:4337960|uncharacterized protein LOC4337960 isoform X1	--	uncharacterized protein LOC4337960 isoform X1 [Oryza sativa Japonica Group]
Os05g0542500	6.99e-08	13.8429	up	--	--	--	Os05g0542500 [Oryza sativa Japonica Group]
Os02g0649900	0.0210928	2.21606	up	Biological Process: transport (GO:0006810);; Cellular Component: intrinsic component of membrane (GO:0031224);; Biological Process: transition metal ion homeostasis (GO:0055076);;	--	--	metal-nicotianamine transporter YSL2 isoform X2 [Oryza sativa Japonica Group]
Os08g0174300	1.81e-07	-2.35646	down	--	--	--	anthocyanin 5-aromatic acyltransferase [Oryza sativa Japonica Group]
Os09g0497500	0.00125432	-1.57817	down	Biological Process: proteolysis (GO:0006508);; Molecular Function: peptidase activity, acting on L-amino acid peptides (GO:0070011);;	--	--	ervatamin-B [Oryza sativa Japonica Group]
Os01g0155600	0.000545108	2.04361	up	--	K12896|1.23832e-94|osa:4324080|serine/arginine-rich splicing factor RS2Z32	Spliceosome (ko03040)	hypothetical protein OsJ_00434 [Oryza sativa Japonica Group]
Os02g0100300	0.0356227	1.19286	up	--	--	--	FAM10 family protein At4g22670 isoform X2 [Oryza sativa Japonica Group]
Os03g0712900	0.00240106	3.72302	up	--	--	--	pentatricopeptide repeat-containing protein At4g01570 [Oryza sativa Japonica Group]
Os04g0346100	0.00793717	1.13678	up	--	K02978|3.71124e-44|osa:4335531|40S ribosomal protein S27	Ribosome (ko03010)	OSJNBa0020I02.1 [Oryza sativa Japonica Group]
Os03g0817900	0.0138667	-1.26891	down	--	--	--	protein trichome birefringence-like 33 [Oryza sativa Japonica Group]
Os04g0562100	1.78e-08	-3.1469	down	--	--	--	lysine histidine transporter-like 8 [Oryza sativa Japonica Group]
Os03g0261800	0.0381355	-1.4591	down	--	--	--	protein FAF-like, chloroplastic [Oryza sativa Japonica Group]
Os07g0516300	0.00758117	-1.20831	down	Cellular Component: intracellular membrane-bounded organelle (GO:0043231);;	--	--	eukaryotic translation initiation factor 4B1 [Oryza sativa Japonica Group]
Os03g0847900	0.0118151	2.32568	up	Cellular Component: intrinsic component of membrane (GO:0031224);;	--	--	Os03g0847900, partial [Oryza sativa Japonica Group]
Os04g0460300	0.00021115	3.70174	up	--	K15015|0|osa:4336049|vacuolar amino acid transporter 1	--	OSIGBa0097P08.12 [Oryza sativa]
Os06g0133200	4.27e-07	-2.48691	down	--	--	--	uncharacterized protein LOC9269221 [Oryza sativa Japonica Group]
Os06g0662200	4.5e-13	-2.3355	down	Molecular Function: nucleic acid binding transcription factor activity (GO:0001071);; Molecular Function: DNA binding (GO:0003677);; Biological Process: transcription, DNA-templated (GO:0006351);;	--	--	bZIP transcription factor RISBZ5 [Oryza sativa Japonica Group]
Os01g0241000	1.55e-05	2.06916	up	--	--	--	uncharacterized protein LOC4327688 [Oryza sativa Japonica Group]
Os04g0229100	0.0185911	-2.79409	down	Biological Process: phenylpropanoid biosynthetic process (GO:0009699);; Molecular Function: oxidoreductase activity, acting on the CH-OH group of donors, NAD or NADP as acceptor (GO:0016616);; Molecular Function: transition metal ion binding (GO:0046914);;	K00083|0|osa:4335223|probable cinnamyl alcohol dehydrogenase 6	Phenylpropanoid biosynthesis (ko00940)	hypothetical protein OsI_14481 [Oryza sativa Indica Group]
Os02g0736400	0.000545108	4.87025	up	--	K00207|0|osa:4330657|dihydropyrimidine dehydrogenase (NADP(+)), chloroplastic	Pyrimidine metabolism (ko00240);; beta-Alanine metabolism (ko00410);; Pantothenate and CoA biosynthesis (ko00770)	dihydropyrimidine dehydrogenase (NADP(+)), chloroplastic [Oryza sativa Japonica Group]
Os02g0755400	0.00274059	4.26869	up	--	--	--	Os02g0755400 [Oryza sativa Japonica Group]
Os01g0192300	2.56e-07	2.02469	up	--	--	--	transcription factor MYBS3-like [Oryza sativa Japonica Group]
Os07g0191700	0.00567526	1.11564	up	Biological Process: RNA splicing, via endonucleolytic cleavage and ligation (GO:0000394);; Biological Process: translation (GO:0006412);; Molecular Function: translation factor activity, RNA binding (GO:0008135);; Molecular Function: RNA ligase activity (GO:0008452);; Molecular Function: purine ribonucleoside binding (GO:0032550);;	--	--	tRNA ligase 1 [Oryza sativa Japonica Group]
Os05g0516100	0.0432779	-1.52509	down	Cellular Component: intracellular membrane-bounded organelle (GO:0043231);;	--	--	uncharacterized protein LOC4339319 [Oryza sativa Japonica Group]
Os08g0438600	8.22e-06	-2.17876	down	Cellular Component: intrinsic component of membrane (GO:0031224);; Cellular Component: intracellular membrane-bounded organelle (GO:0043231);;	--	--	probable arabinosyltransferase ARAD1 isoform X1 [Oryza sativa Japonica Group]
Os12g0621000	0.000274023	1.22451	up	Molecular Function: ubiquitin-like protein-specific protease activity (GO:0019783);; Biological Process: modification-dependent protein catabolic process (GO:0019941);; Biological Process: protein modification by small protein removal (GO:0070646);;	--	--	hypothetical protein OsJ_36905 [Oryza sativa Japonica Group]
Os05g0445500	0.00199356	1.51857	up	--	--	--	Os05g0445500, partial [Oryza sativa Japonica Group]
Os12g0178700	0.0160725	1.54921	up	Molecular Function: protein binding (GO:0005515);; Biological Process: peroxisome organization (GO:0007031);; Cellular Component: plastid outer membrane (GO:0009527);; Biological Process: chloroplast organization (GO:0009658);; Molecular Function: nucleoside-triphosphatase activity (GO:0017111);; Molecular Function: purine ribonucleoside binding (GO:0032550);; Cellular Component: microbody (GO:00…	--	--	Os12g0178700 [Oryza sativa Japonica Group]
Os03g0676300	0.00054459	1.7091	up	--	--	--	ATP-dependent RNA helicase A [Oryza sativa Japonica Group]
Os02g0474000	0.00110901	1.72128	up	--	--	--	F-box only protein 8 [Oryza sativa Japonica Group]
Os03g0824100	0.0229307	1.06327	up	Cellular Component: intracellular membrane-bounded organelle (GO:0043231);;	--	--	pentatricopeptide repeat-containing protein At1g74850, chloroplastic isoform X2 [Oryza sativa Japonica Group]
Os06g0506600	0.01323	3.39674	up	Molecular Function: purine ribonucleoside binding (GO:0032550);;	--	--	Os06g0506600 [Oryza sativa Japonica Group]
Os04g0417800	0.00153185	-1.58132	down	--	--	--	WD repeat-containing protein 44 [Oryza sativa Japonica Group]
Os07g0500300	0.000545108	-1.8633	down	--	--	--	GTPase activating protein 1-like [Oryza sativa Japonica Group]
Os01g0974200	0.0230239	-1.99775	down	Molecular Function: catalytic activity (GO:0003824);; Cellular Component: intracellular membrane-bounded organelle (GO:0043231);;	--	--	hypothetical protein OsI_05418 [Oryza sativa Indica Group]
Os08g0500300	0.0128569	-1.62542	down	Molecular Function: phosphoprotein phosphatase activity (GO:0004721);; Biological Process: cellular protein modification process (GO:0006464);; Molecular Function: cation binding (GO:0043169);;	--	--	probable protein phosphatase 2C 66 [Oryza sativa Japonica Group]
Os05g0389400	0.01123	1.67697	up	Cellular Component: intrinsic component of membrane (GO:0031224);; Biological Process: establishment of localization (GO:0051234);;	--	--	probable folate-biopterin transporter 7 isoform X1 [Oryza sativa Japonica Group]
Os05g0569300	2.2e-05	2.39715	up	Molecular Function: nucleic acid binding transcription factor activity (GO:0001071);; Molecular Function: DNA binding (GO:0003677);; Biological Process: transcription, DNA-templated (GO:0006351);;	K09060|0|osa:4339653|common plant regulatory factor 1	--	common plant regulatory factor 1 [Oryza sativa Japonica Group]
Os05g0574300	0.00519605	-1.26468	down	--	K11252|2.74249e-48|ats:109764242|LOC109764242; histone H2B.4	--	unnamed protein product [Triticum turgidum subsp. durum]
Os05g0584600	4.28e-06	-1.83932	down	--	--	--	hypothetical protein OsI_21164 [Oryza sativa Indica Group]
Os01g0837200	1.03e-05	-3.35925	down	Biological Process: polysaccharide catabolic process (GO:0000272);; Molecular Function: carbon-oxygen lyase activity, acting on polysaccharides (GO:0016837);; Cellular Component: intrinsic component of membrane (GO:0031224);; Molecular Function: cation binding (GO:0043169);;	--	--	Os01g0837200, partial [Oryza sativa Japonica Group]
Os07g0468100	0.0239925	-1.05207	down	--	K00799|9.50428e-130|osa:4343183|probable glutathione S-transferase GSTU1	Glutathione metabolism (ko00480)	probable glutathione S-transferase GSTU1 [Oryza sativa Japonica Group]
Os04g0652700	0.0327641	2.3724	up	Molecular Function: nuclease activity (GO:0004518);; Biological Process: DNA metabolic process (GO:0006259);; Molecular Function: organic cyclic compound binding (GO:0097159);;	--	--	endonuclease 2 [Oryza sativa Japonica Group]
Os06g0110000	0.00836566	-1.64922	down	--	K04123|0|osa:4339885|cytochrome P450 88A1	Diterpenoid biosynthesis (ko00904)	hypothetical protein OsI_07000 [Oryza sativa Indica Group]
Os01g0706700	0.0105799	2.10861	up	Molecular Function: anion channel activity (GO:0005253);; Biological Process: chloride transport (GO:0006821);; Cellular Component: ion channel complex (GO:0034702);;	K19327|0|osa:4327675|anoctamin-like protein Os01g0706700	--	hypothetical protein EE612_005267 [Oryza sativa]
Os01g0611100	0.0354859	1.58641	up	--	K07936|5.01582e-141|osa:4325312|GTP-binding nuclear protein Ran-1	Ribosome biogenesis in eukaryotes (ko03008);; RNA transport (ko03013)	hypothetical protein OsJ_02575 [Oryza sativa Japonica Group]
Os05g0381400	1.48e-06	13.942	up	Cellular Component: intrinsic component of membrane (GO:0031224);;	--	--	membrane protein PM19L [Oryza sativa Japonica Group]
Os05g0435400	0.00905952	1.83794	up	--	--	--	uncharacterized protein LOC4338896 [Oryza sativa Japonica Group]
Os05g0161500	0.000650852	-2.3818	down	--	K00951|0|osa:4337890|probable GTP diphosphokinase CRSH2, chloroplastic	Purine metabolism (ko00230)	probable GTP diphosphokinase CRSH2, chloroplastic [Oryza sativa Japonica Group]
Os03g0724700	0.00562884	2.24643	up	--	--	--	uncharacterized protein LOC4333959 [Oryza sativa Japonica Group]
Os03g0374600	0.0149299	6.21814	up	--	K19892|0|osa:4332950|glucan endo-1,3-beta-glucosidase 1	Starch and sucrose metabolism (ko00500)	glucan endo-1,3-beta-glucosidase 1 [Oryza sativa Japonica Group]
Os02g0105900	0.00377333	1.52186	up	--	K02987|2.11799e-169|osa:4328016|40S ribosomal protein S4	Ribosome (ko03010)	40S ribosomal protein S4 [Oryza sativa Japonica Group]
Os09g0501200	0.00613942	1.58709	up	--	K02912|4.2156e-81|osa:9268508|60S ribosomal protein L32-1	Ribosome (ko03010)	hypothetical protein OsJ_29904 [Oryza sativa Japonica Group]
Os01g0719125	0.00151561	2.27367	up	Molecular Function: transition metal ion binding (GO:0046914);;	K10144|1.20851e-101|osa:4324695|E3 ubiquitin-protein ligase MIEL1	Ubiquitin mediated proteolysis (ko04120)	hypothetical protein EJB05_17180 [Eragrostis curvula]
Os11g0160100	0.0485223	1.76754	up	--	--	--	uncharacterized protein LOC4349846 isoform X1 [Oryza sativa Japonica Group]
xxx_newGene_13726	2.73e-05	1.78342	up	Molecular Function: nucleic acid binding (GO:0003676);; Molecular Function: DNA polymerase activity (GO:0034061);; Biological Process: DNA biosynthetic process (GO:0071897);;	--	--	hypothetical protein C2845_PM07G29970 [Panicum miliaceum]
Os04g0671500	0.0349774	-1.69724	down	Molecular Function: catalytic activity (GO:0003824);; Biological Process: single-organism metabolic process (GO:0044710);;	K17839|0|osa:4337360|probable polyamine oxidase 4	Arginine and proline metabolism (ko00330);; beta-Alanine metabolism (ko00410);; Pantothenate and CoA biosynthesis (ko00770)	probable polyamine oxidase 4 [Oryza sativa Japonica Group]
Os02g0241200	0.00495348	-1.60039	down	Molecular Function: nucleic acid binding (GO:0003676);; Biological Process: transcription, DNA-templated (GO:0006351);; Cellular Component: intracellular membrane-bounded organelle (GO:0043231);;	--	--	uncharacterized protein LOC107275964 [Oryza sativa Japonica Group]
Os08g0141400	0.00283586	4.85142	up	Molecular Function: catalytic activity (GO:0003824);; Cellular Component: intracellular membrane-bounded organelle (GO:0043231);; Biological Process: single-organism metabolic process (GO:0044710);; Molecular Function: metal ion binding (GO:0046872);;	--	--	putative NADH dehydrogenase [Oryza sativa Japonica Group]
Os03g0751100	0.00734744	-1.71372	down	Biological Process: transport (GO:0006810);; Cellular Component: intrinsic component of membrane (GO:0031224);;	--	--	oligopeptide transporter 3 [Oryza sativa Japonica Group]
Os03g0760700	0.00473221	1.10763	up	Biological Process: sulfur amino acid biosynthetic process (GO:0000097);; Molecular Function: nucleotide binding (GO:0000166);; Molecular Function: protein binding (GO:0005515);; Biological Process: isoleucine metabolic process (GO:0006549);; Biological Process: threonine metabolic process (GO:0006566);; Biological Process: lysine biosynthetic process (GO:0009085);; Molecular Function: oxidoreduc…	K00133|0|osa:4334188|aspartate-semialdehyde dehydrogenase	Glycine, serine and threonine metabolism (ko00260);; Monobactam biosynthesis (ko00261);; Cysteine and methionine metabolism (ko00270);; Lysine biosynthesis (ko00300);; 2-Oxocarboxylic acid metabolism (ko01210);; Biosynthesis of amino acids (ko01230)	uncharacterized protein LOC4334188 [Oryza sativa Japonica Group]
Os01g0524700	0.000315476	1.93148	up	--	--	--	uncharacterized protein LOC4323930 [Oryza sativa Japonica Group]
Os04g0364800	0.000659279	-2.78789	down	--	--	--	putative ripening-related protein 1 [Oryza sativa Japonica Group]
Os08g0445700	0.0179358	3.99248	up	Biological Process: trehalose metabolic process (GO:0005991);; Cellular Component: intracellular membrane-bounded organelle (GO:0043231);;	K16055|0|osa:4345706|probable alpha,alpha-trehalose-phosphate synthase [UDP-forming] 9	Starch and sucrose metabolism (ko00500)	probable alpha,alpha-trehalose-phosphate synthase [UDP-forming] 9 [Oryza sativa Japonica Group]
Os09g0491756	0.00670042	1.30593	up	Biological Process: RNA splicing, via transesterification reactions with bulged adenosine as nucleophile (GO:0000377);; Molecular Function: nucleic acid binding (GO:0003676);; Cellular Component: nucleus (GO:0005634);; Molecular Function: small molecule binding (GO:0036094);; Molecular Function: cation binding (GO:0043169);;	K12836|4.48978e-116|osa:9268567|splicing factor U2af small subunit A	Spliceosome (ko03040)	U2 snRNP auxiliary factor, small subunit [Oryza sativa]
Os08g0116500	6.31e-05	1.58829	up	--	K02942|2.37513e-38|osa:4344516|60S acidic ribosomal protein P1	Ribosome (ko03010)	60S acidic ribosomal protein P1 [Oryza sativa Japonica Group]
Os02g0481900	0.00649187	-1.42542	down	Molecular Function: nuclease activity (GO:0004518);; Cellular Component: intracellular membrane-bounded organelle (GO:0043231);; Biological Process: nucleic acid metabolic process (GO:0090304);; Molecular Function: organic cyclic compound binding (GO:0097159);;	K12619|0|osa:4329368|5'-3' exoribonuclease 4 isoform X1	Ribosome biogenesis in eukaryotes (ko03008);; RNA degradation (ko03018)	5&apos;-3&apos; exoribonuclease 4 isoform X9 [Oryza sativa Japonica Group]
Os01g0693800	0.0174235	1.03958	up	--	K01733|0|osa:4325651|threonine synthase, chloroplastic	Glycine, serine and threonine metabolism (ko00260);; Vitamin B6 metabolism (ko00750);; Biosynthesis of amino acids (ko01230)	Os01g0693800, partial [Oryza sativa Japonica Group]
Os10g0112100	0.0258944	-1.6478	down	--	--	--	cell number regulator 10 [Oryza sativa Japonica Group]
Os07g0224000	0.0431763	1.23877	up	--	--	--	Os07g0224000 [Oryza sativa Japonica Group]
Os01g0700100	4.26e-06	-1.99461	down	--	K15382|1.60894e-159|osa:4326923|bidirectional sugar transporter SWEET2b	--	bidirectional sugar transporter SWEET2b [Oryza sativa Japonica Group]
Os03g0654500	0.00895631	-2.22142	down	Cellular Component: intrinsic component of membrane (GO:0031224);; Cellular Component: intracellular membrane-bounded organelle (GO:0043231);;	K13863|0|osa:4333602|uncharacterized protein LOC4333602	--	uncharacterized protein LOC4333602 [Oryza sativa Japonica Group]
Os04g0690500	0.0143203	2.98408	up	--	--	--	uncharacterized protein LOC4337497 [Oryza sativa Japonica Group]
Os12g0139400	7.69e-13	-4.02449	down	Molecular Function: signal transducer activity (GO:0004871);; Biological Process: transcription, DNA-templated (GO:0006351);; Biological Process: hormone-mediated signaling pathway (GO:0009755);; Biological Process: intracellular signal transduction (GO:0035556);; Cellular Component: intracellular membrane-bounded organelle (GO:0043231);;	K14492|1.40171e-120|osa:4351462|two-component response regulator ORR10	Plant hormone signal transduction (ko04075)	two-component response regulator ORR10 [Oryza sativa Japonica Group]
Os02g0121500	0.036894	-1.52234	down	--	--	--	uncharacterized protein LOC4328122 isoform X4 [Oryza sativa Japonica Group]
Os12g0514000	0.00252929	-1.7661	down	--	--	--	polyol transporter 5 [Oryza sativa Japonica Group]
Os07g0693800	0.00193848	-1.80248	down	--	K10257|0|osa:4344389|omega-3 fatty acid desaturase, chloroplastic	--	omega-3 fatty acid desaturase, chloroplastic [Oryza sativa Japonica Group]
Os03g0113700	0.000795585	2.07691	up	Molecular Function: protein binding (GO:0005515);; Biological Process: cellular process (GO:0009987);; Molecular Function: purine ribonucleoside binding (GO:0032550);; Cellular Component: intracellular membrane-bounded organelle (GO:0043231);;	K04043|0|osa:4331379|heat shock 70 kDa protein, mitochondrial	RNA degradation (ko03018)	heat shock 70 kDa protein, mitochondrial [Oryza sativa Japonica Group]
Os01g0825500	0.00345628	-1.90644	down	Cellular Component: intrinsic component of membrane (GO:0031224);;	--	--	protein NUCLEAR FUSION DEFECTIVE 4 [Oryza sativa Japonica Group]
Os10g0505900	9.15e-16	9.83536	up	--	--	--	low-temperature-induced 65 kDa protein [Oryza sativa Japonica Group]
Os05g0355400	2.14e-09	5.25537	up	Biological Process: response to stimulus (GO:0050896);;	--	--	Os05g0355400 [Oryza sativa Japonica Group]
Os12g0170400	0.0110269	-1.24793	down	Biological Process: regulation of transcription, DNA-templated (GO:0006355);; Biological Process: response to metal ion (GO:0010038);; Molecular Function: cation binding (GO:0043169);; Cellular Component: intracellular membrane-bounded organelle (GO:0043231);; Molecular Function: organic cyclic compound binding (GO:0097159);;	--	--	zinc finger protein STAR3 [Oryza sativa Japonica Group]
xxx_newGene_11181	3.27e-10	3.20748	up	Cellular Component: intrinsic component of membrane (GO:0031224);; Cellular Component: intracellular membrane-bounded organelle (GO:0043231);;	--	--	glycine-rich RNA-binding protein-like [Oryza sativa Japonica Group]
Os01g0723800	0.0021088	-1.70456	down	Biological Process: transport (GO:0006810);; Molecular Function: P-P-bond-hydrolysis-driven transmembrane transporter activity (GO:0015405);; Molecular Function: nucleoside-triphosphatase activity (GO:0017111);; Cellular Component: intrinsic component of membrane (GO:0031224);; Molecular Function: purine ribonucleoside binding (GO:0032550);;	K05658|0|osa:4324720|putative ABC transporter B family member 8	ABC transporters (ko02010)	putative ABC transporter B family member 8 [Oryza sativa Japonica Group]
Os01g0276000	0.000760662	1.20107	up	--	K02908|2.88351e-75|osa:4324441|60S ribosomal protein L30	Ribosome (ko03010)	hypothetical protein EJB05_32384, partial [Eragrostis curvula]
Os08g0516900	0.0234726	1.36328	up	--	--	--	hypothetical protein OsI_29885 [Oryza sativa Indica Group]
Os03g0319400	1.03e-07	-2.11201	down	--	--	--	CBL-interacting protein kinase 31 isoform X1 [Oryza sativa Japonica Group]
Os04g0373000	0.0016615	-1.37559	down	Cellular Component: intrinsic component of membrane (GO:0031224);; Molecular Function: metal ion transmembrane transporter activity (GO:0046873);; Biological Process: transmembrane transport (GO:0055085);; Biological Process: divalent metal ion transport (GO:0070838);;	--	--	Os04g0373000, partial [Oryza sativa Japonica Group]
Os07g0695800	0.00826124	2.35605	up	--	K00164|0|osa:4344403|2-oxoglutarate dehydrogenase, mitochondrial	Citrate cycle (TCA cycle) (ko00020);; Carbon metabolism (ko01200)	2-oxoglutarate dehydrogenase, mitochondrial [Oryza sativa Japonica Group]
Os08g0385000	9.16e-06	3.37224	up	--	--	--	uncharacterized protein LOC4345453 [Oryza sativa Japonica Group]
Os09g0509050	0.00490203	-1.99937	down	Molecular Function: nucleic acid binding (GO:0003676);; Biological Process: transcription, DNA-templated (GO:0006351);; Cellular Component: intracellular membrane-bounded organelle (GO:0043231);;	--	--	NAC domain-containing protein 83 [Oryza sativa Japonica Group]
Os04g0430100	0.00169367	1.56468	up	--	K02947|2.62069e-62|osa:4335865|40S ribosomal protein S10	Ribosome (ko03010)	hypothetical protein EJB05_37967, partial [Eragrostis curvula]
Os01g0923700	0.0247668	1.10601	up	Molecular Function: protein histidine kinase activity (GO:0004673);; Biological Process: protein phosphorylation (GO:0006468);; Biological Process: iron ion transport (GO:0006826);; Biological Process: cellular response to starvation (GO:0009267);; Biological Process: response to cold (GO:0009409);; Biological Process: response to bacterium (GO:0009617);; Biological Process: response to abscisic …	K14489|0|osa:9271913|probable histidine kinase 3	Plant hormone signal transduction (ko04075)	probable histidine kinase 3 [Oryza sativa Japonica Group]
Os04g0685100	0.00648036	1.04772	up	--	K14852|0|osa:4337459|ribosome biogenesis regulatory protein homolog	--	ribosome biogenesis regulatory protein homolog [Oryza sativa Japonica Group]
Os10g0503500	0.0241274	-1.44513	down	Molecular Function: nucleotide binding (GO:0000166);; Molecular Function: malic enzyme activity (GO:0004470);; Cellular Component: plastid (GO:0009536);; Molecular Function: purine ribonucleoside binding (GO:0032550);; Biological Process: dicarboxylic acid metabolic process (GO:0043648);; Molecular Function: transition metal ion binding (GO:0046914);; Molecular Function: protein dimerization acti…	K00028|0|osa:4349051|NAD-dependent malic enzyme 59 kDa isoform, mitochondrial isoform X1	Pyruvate metabolism (ko00620);; Carbon fixation in photosynthetic organisms (ko00710);; Carbon metabolism (ko01200)	NAD-dependent malic enzyme 59 kDa isoform, mitochondrial isoform X1 [Oryza sativa Japonica Group]
Os05g0177500	2.26e-05	-1.88296	down	--	--	--	UDP-glycosyltransferase 73E1 [Oryza sativa Japonica Group]
Os01g0739500	0.01381	3.02023	up	--	--	--	uncharacterized protein LOC4327202 [Oryza sativa Japonica Group]
Os12g0115150	0.00106216	2.29259	up	Molecular Function: binding (GO:0005488);; Biological Process: lipid localization (GO:0010876);; Molecular Function: hydrolase activity (GO:0016787);; Biological Process: protein metabolic process (GO:0019538);; Biological Process: establishment of localization (GO:0051234);;	--	--	hypothetical protein EE612_057399 [Oryza sativa]
Os03g0234200	0.00109559	1.70624	up	Molecular Function: structural molecule activity (GO:0005198);; Biological Process: gene expression (GO:0010467);; Cellular Component: intracellular ribonucleoprotein complex (GO:0030529);; Cellular Component: intracellular membrane-bounded organelle (GO:0043231);;	K02927|1.14526e-26|osa:4347896|ubiquitin-60S ribosomal protein L40-2	Ribosome (ko03010);; Ubiquitin mediated proteolysis (ko04120)	PREDICTED: ubiquitin-60S ribosomal protein L40-2 [Oryza brachyantha]
Os02g0591700	8.4e-05	1.45626	up	--	K02934|1.03255e-137|osa:4329831|60S ribosomal protein L6-3	Ribosome (ko03010)	60S ribosomal protein L6-3 [Oryza sativa Japonica Group]
Os06g0589600	0.046809	-1.9324	down	Biological Process: cellular protein modification process (GO:0006464);; Biological Process: phosphate-containing compound metabolic process (GO:0006796);; Molecular Function: kinase activity (GO:0016301);; Cellular Component: intrinsic component of membrane (GO:0031224);; Molecular Function: purine ribonucleoside binding (GO:0032550);; Cellular Component: intracellular membrane-bounded organelle…	--	--	Os06g0589600, partial [Oryza sativa Japonica Group]
Os03g0356414	0.0149122	3.24378	up	--	K04506|0|osa:9266295|E3 ubiquitin-protein ligase SINAT5 isoform X1	Ubiquitin mediated proteolysis (ko04120)	hypothetical protein OsI_11609 [Oryza sativa Indica Group]
Os02g0178100	0.00371751	-1.0042	down	--	--	--	Os02g0178100, partial [Oryza sativa Japonica Group]
Os12g0508300	0.0313939	1.25874	up	Molecular Function: nucleic acid binding (GO:0003676);; Molecular Function: structural molecule activity (GO:0005198);; Biological Process: gene expression (GO:0010467);; Cellular Component: small ribosomal subunit (GO:0015935);; Cellular Component: intrinsic component of membrane (GO:0031224);; Cellular Component: intracellular membrane-bounded organelle (GO:0043231);;	K02980|2.04318e-33|zju:107423917|40S ribosomal protein S29-like	Ribosome (ko03010)	hypothetical protein SETIT_9G073900v2 [Setaria italica]
Os02g0136150	0.0142204	2.28796	up	--	--	--	Os02g0136150, partial [Oryza sativa Japonica Group]
Os04g0376000	0.00510301	1.4001	up	--	K02918|1.06331e-77|osa:4335607|60S ribosomal protein L35	Ribosome (ko03010)	PREDICTED: 60S ribosomal protein L35 [Oryza brachyantha]
Os07g0608700	0.00359553	1.31744	up	--	--	--	Os07g0608700 [Oryza sativa Japonica Group]
Os05g0115100	0.000621193	5.01385	up	--	--	--	uncharacterized protein LOC4337615 isoform X1 [Oryza sativa Japonica Group]
Os08g0558000	0.000176872	1.30248	up	--	K02865|2.20494e-104|osa:9268245|60S ribosomal protein L10a	Ribosome (ko03010)	hypothetical protein OsJ_28264 [Oryza sativa Japonica Group]
Os03g0745550	0.0264032	3.38375	up	Cellular Component: intrinsic component of membrane (GO:0031224);;	--	--	hypothetical protein [Oryza sativa Japonica Group]
Os04g0244800	0.0122616	1.05361	up	--	--	--	heavy metal-associated isoprenylated plant protein 27 [Oryza sativa Japonica Group]
Os09g0541050	0.0188657	-2.48652	down	--	K09872|5.60693e-153|osa:4347729|probable aquaporin PIP2-7	--	probable aquaporin PIP2-7 [Oryza sativa Japonica Group]
xxx_newGene_9320	3.79e-05	-2.81184	down	Cellular Component: intrinsic component of membrane (GO:0031224);;	--	--	hypothetical protein [Oryza sativa Japonica Group]
Os03g0203200	1.02e-08	2.16708	up	--	--	--	strigolactone esterase D14 [Oryza sativa Japonica Group]
Os03g0726400	0.0200545	1.74801	up	Cellular Component: intrinsic component of membrane (GO:0031224);; Cellular Component: intracellular membrane-bounded organelle (GO:0043231);;	--	--	uncharacterized protein DDB_G0290803 [Oryza sativa Japonica Group]
Os06g0472200	0.018407	1.1177	up	Cellular Component: intracellular membrane-bounded organelle (GO:0043231);;	--	--	Os06g0472200, partial [Oryza sativa Japonica Group]
Os08g0140500	4.29e-08	4.26635	up	Molecular Function: carbon-carbon lyase activity (GO:0016830);; Biological Process: carboxylic acid metabolic process (GO:0019752);; Molecular Function: anion binding (GO:0043168);;	K01593|0|osa:4344637|aromatic-L-amino-acid decarboxylase	Tyrosine metabolism (ko00350);; Phenylalanine metabolism (ko00360);; Tryptophan metabolism (ko00380);; Isoquinoline alkaloid biosynthesis (ko00950);; Betalain biosynthesis (ko00965)	tryptophan decarboxylase 1-like [Oryza sativa Japonica Group]
Os02g0662700	0.000440652	-1.70765	down	--	--	--	scarecrow-like protein 6 [Oryza sativa Japonica Group]
Os03g0372700	0.0118024	1.14293	up	--	K14798|0|osa:4332942|protein LTV1 homolog isoform X1	--	protein LTV1 homolog [Oryza sativa Japonica Group]
xxx_newGene_9139	0.0127315	-1.26723	down	Molecular Function: transaminase activity (GO:0008483);; Biological Process: glutamine family amino acid metabolic process (GO:0009064);; Biological Process: folic acid-containing compound biosynthetic process (GO:0009396);; Cellular Component: plastid (GO:0009536);; Molecular Function: carbon-carbon lyase activity (GO:0016830);; Biological Process: dicarboxylic acid metabolic process (GO:0043648…	K13950|0|osa:4341959|probable aminodeoxychorismate synthase, chloroplastic isoform X1	Folate biosynthesis (ko00790);; Biosynthesis of cofactors (ko01240)	probable aminodeoxychorismate synthase, chloroplastic isoform X1 [Oryza sativa Japonica Group]
Os11g0261600	0.00460202	4.53709	up	--	--	--	Os11g0261600, partial [Oryza sativa Japonica Group]
Os02g0191300	0.00581559	4.76548	up	--	K14207|0|osa:4328577|sodium-coupled neutral amino acid transporter 1	--	amino acid transporter AVT6A [Oryza sativa Japonica Group]
Os06g0166400	4.82e-26	3.80407	up	--	K09286|2.51792e-47|osa:4340244|ethylene-responsive transcription factor RAP2-9	--	ethylene-responsive transcription factor RAP2-9 [Oryza sativa Japonica Group]
Os01g0566500	2.61e-07	-2.90093	down	Cellular Component: plastid (GO:0009536);; Molecular Function: oxidoreductase activity, acting on single donors with incorporation of molecular oxygen (GO:0016701);; Molecular Function: cation binding (GO:0043169);; Biological Process: single-organism metabolic process (GO:0044710);;	K17913|0|osa:4327933|carotenoid cleavage dioxygenase 8 homolog A, chloroplastic	Carotenoid biosynthesis (ko00906)	carotenoid cleavage dioxygenase 8 homolog A, chloroplastic [Oryza sativa Japonica Group]
Os07g0194800	0.00252929	3.60866	up	Molecular Function: binding (GO:0005488);; Biological Process: cellular protein modification process (GO:0006464);; Molecular Function: transferase activity, transferring hexosyl groups (GO:0016758);; Cellular Component: intrinsic component of membrane (GO:0031224);; Cellular Component: Golgi apparatus part (GO:0044431);;	K20843|0|osa:4342643|probable beta-1,3-galactosyltransferase 19	--	hydroxyproline O-galactosyltransferase GALT6 [Oryza sativa Japonica Group]
Os09g0521400	0.0164322	4.12438	up	--	K01641|0|osa:4347614|hydroxymethylglutaryl-CoA synthase	Synthesis and degradation of ketone bodies (ko00072);; Valine, leucine and isoleucine degradation (ko00280);; Butanoate metabolism (ko00650);; Terpenoid backbone biosynthesis (ko00900)	hydroxymethylglutaryl-CoA synthase [Oryza sativa Japonica Group]
Os03g0765400	9.82e-06	6.6428	up	Biological Process: developmental process involved in reproduction (GO:0003006);; Cellular Component: nuclear envelope (GO:0005635);; Cellular Component: plastid (GO:0009536);; Biological Process: nuclear transport (GO:0051169);;	--	--	Os03g0765400, partial [Oryza sativa Japonica Group]
Os06g0680500	0.0158804	-1.70123	down	--	--	--	Os06g0680500, partial [Oryza sativa Japonica Group]
xxx_newGene_12694	0.000212865	2.10548	up	Cellular Component: plant-type vacuole (GO:0000325);; Molecular Function: chloride channel activity (GO:0005254);; Biological Process: inorganic anion transport (GO:0015698);; Cellular Component: intrinsic component of membrane (GO:0031224);; Biological Process: regulation of ion transmembrane transport (GO:0034765);;	K05016|0|osa:107279829|chloride channel protein CLC-c-like isoform X1	--	chloride channel [Oryza sativa Japonica Group]
Os11g0209000	0.0444156	-1.66126	down	Cellular Component: intrinsic component of membrane (GO:0031224);;	--	--	expressed protein [Oryza sativa Japonica Group]
Os04g0534166	0.0171916	-2.58182	down	Biological Process: cellular protein modification process (GO:0006464);; Molecular Function: kinase activity (GO:0016301);; Cellular Component: intrinsic component of membrane (GO:0031224);; Molecular Function: purine ribonucleoside binding (GO:0032550);;	--	--	Os04g0534166 [Oryza sativa Japonica Group]
xxx_newGene_9416	0.0018861	-1.44468	down	Biological Process: vesicle-mediated transport (GO:0016192);; Cellular Component: protein complex (GO:0043234);;	--	--	hypothetical protein OsI_25350 [Oryza sativa Indica Group]
Os06g0593800	0.00719747	-1.12001	down	--	--	--	crocetin glucosyltransferase, chloroplastic [Oryza sativa Japonica Group]
Os08g0203100	0.00371751	4.78933	up	--	--	--	Os08g0203100, partial [Oryza sativa Japonica Group]
Os03g0341100	0.0166078	1.2835	up	--	K02883|1.83204e-130|osa:4332793|60S ribosomal protein L18-3	Ribosome (ko03010)	60S ribosomal protein L18-3 [Oryza sativa Japonica Group]
Os09g0528700	0.000168	-2.50308	down	--	K20619|0|osa:4347650|cytochrome P450 78A9	--	cytochrome P450 78A9 [Oryza sativa Japonica Group]
Os06g0715300	0.000195479	-2.30298	down	Molecular Function: hydrolase activity, hydrolyzing O-glycosyl compounds (GO:0004553);; Biological Process: cellulose metabolic process (GO:0030243);; Cellular Component: intrinsic component of membrane (GO:0031224);; Biological Process: external encapsulating structure organization (GO:0045229);;	--	--	endoglucanase 18 [Oryza sativa Japonica Group]
Os06g0553001	4.1e-08	4.89272	up	Molecular Function: nucleic acid binding transcription factor activity (GO:0001071);; Molecular Function: DNA binding (GO:0003677);; Biological Process: transcription, DNA-templated (GO:0006351);; Cellular Component: intracellular membrane-bounded organelle (GO:0043231);;	K09419|1.4911e-74|osa:4341273|heat stress transcription factor C-2b	--	heat stress transcription factor C-2b [Oryza sativa Japonica Group]
Os03g0200500	0.000796216	1.45756	up	--	K02984|1.05515e-178|osa:4331966|40S ribosomal protein S3a	Ribosome (ko03010)	40S ribosomal protein S3a [Oryza sativa Japonica Group]
Os08g0478000	1.14e-07	3.45822	up	--	--	--	unknown protein [Oryza sativa Japonica Group]
Os04g0197100	0.0459216	-1.10729	down	--	--	--	hypothetical protein OsJ_13904 [Oryza sativa Japonica Group]
Os05g0577700	0.0152495	2.17796	up	Biological Process: cellular protein modification process (GO:0006464);; Molecular Function: kinase activity (GO:0016301);; Molecular Function: purine ribonucleoside binding (GO:0032550);;	--	--	serine/threonine-protein kinase STY13 [Oryza sativa Japonica Group]
Os04g0571300	6.51e-07	3.46235	up	--	--	--	F-box protein PP2-A13 [Oryza sativa Japonica Group]
Os03g0137600	0.00694847	-2.94214	down	--	--	--	uncharacterized protein LOC4331552 [Oryza sativa Japonica Group]
Os07g0616600	2.15e-05	1.89479	up	--	K02998|5.71629e-153|osa:4343909|40S ribosomal protein Sa-2	Ribosome (ko03010)	40S ribosomal protein Sa-2 [Oryza sativa Japonica Group]
Os04g0196200	0.000182629	-4.33707	down	--	--	--	acetylserotonin O-methyltransferase 1-like [Oryza sativa Japonica Group]
Os02g0699600	4.17e-05	1.51282	up	--	K02870|1.64018e-110|osa:4330425|60S ribosomal protein L12-1	Ribosome (ko03010)	60S ribosomal protein L12-1 [Oryza sativa Japonica Group]
Os04g0473400	4.72e-05	1.60084	up	--	K02934|6.72003e-133|osa:4336140|60S ribosomal protein L6-3	Ribosome (ko03010)	H0305E08.7 [Oryza sativa]
Os01g0524500	0.0365329	-1.7954	down	Molecular Function: nucleic acid binding (GO:0003676);; Biological Process: transcription, DNA-templated (GO:0006351);; Cellular Component: intracellular membrane-bounded organelle (GO:0043231);;	--	--	Os01g0524500 [Oryza sativa Japonica Group]
Os12g0115700	0.0010006	-2.08456	down	Biological Process: flavonoid metabolic process (GO:0009812);; Molecular Function: intramolecular lyase activity (GO:0016872);;	--	--	probable chalcone--flavonone isomerase 3 isoform X2 [Oryza sativa Japonica Group]
Os06g0725300	0.00144504	-1.6007	down	--	--	--	expansin-like A4 isoform X2 [Oryza sativa Japonica Group]
Os05g0447200	0.0061192	-1.8641	down	--	--	--	auxin transporter-like protein 2 isoform X1 [Oryza sativa Japonica Group]
Os01g0316600	0.00350278	1.06611	up	Molecular Function: small molecule binding (GO:0036094);; Molecular Function: organic cyclic compound binding (GO:0097159);;	K12890|1.51725e-99|obr:102701405|serine/arginine-rich-splicing factor SR34-like	Spliceosome (ko03040)	hypothetical protein OsI_01613 [Oryza sativa Indica Group]
Os05g0494600	3.72e-07	3.72022	up	--	--	--	EID1-like F-box protein 3 [Oryza sativa Japonica Group]
Os10g0565300	0.0252306	2.37712	up	--	K19525|0|osa:4349418|uncharacterized protein LOC4349418 isoform X1	--	uncharacterized protein LOC4349418 isoform X1 [Oryza sativa Japonica Group]
Os04g0430200	3.82e-10	2.14672	up	Molecular Function: protein kinase activity (GO:0004672);; Biological Process: cellular protein modification process (GO:0006464);; Cellular Component: intrinsic component of membrane (GO:0031224);; Molecular Function: purine ribonucleoside binding (GO:0032550);; Molecular Function: phosphoric ester hydrolase activity (GO:0042578);;	--	--	PI-PLC X domain-containing protein At5g67130 [Oryza sativa Japonica Group]
Os01g0892600	0.0127315	-1.49037	down	Molecular Function: catalytic activity (GO:0003824);; Cellular Component: intracellular membrane-bounded organelle (GO:0043231);;	--	--	pectin acetylesterase 6 [Oryza sativa Japonica Group]
Os03g0650900	0.00659299	3.45259	up	Molecular Function: catalytic activity (GO:0003824);; Biological Process: cellular protein metabolic process (GO:0044267);; Molecular Function: transition metal ion binding (GO:0046914);;	K16275|0|osa:4333590|probable E3 ubiquitin-protein ligase BAH1-like 1 isoform X1	--	probable E3 ubiquitin-protein ligase BAH1-like 1 isoform X1 [Oryza sativa Japonica Group]
Os04g0634400	5.04e-07	-4.7111	down	--	--	--	Os04g0634400 [Oryza sativa Japonica Group]
Os02g0164300	0.000237403	-1.4818	down	Biological Process: cellular protein modification process (GO:0006464);; Molecular Function: transferase activity, transferring hexosyl groups (GO:0016758);; Cellular Component: intrinsic component of membrane (GO:0031224);; Cellular Component: Golgi apparatus part (GO:0044431);;	K20855|1.45613e-76|obr:102720396|probable beta-1,3-galactosyltransferase 2	--	PREDICTED: probable beta-1,3-galactosyltransferase 2 [Oryza brachyantha]
Os08g0520900	0.0361425	1.31523	up	Molecular Function: glycogen debranching enzyme activity (GO:0004133);; Biological Process: cellular glucan metabolic process (GO:0006073);; Biological Process: macromolecule biosynthetic process (GO:0009059);; Cellular Component: plastid (GO:0009536);; Molecular Function: hydrolase activity, acting on glycosyl bonds (GO:0016798);; Cellular Component: isoamylase complex (GO:0043033);;	K01214|0|osa:4346068|isoamylase 1, chloroplastic	Starch and sucrose metabolism (ko00500)	isoamylase [Oryza sativa Indica Group]
Os08g0497300	0.0245997	-1.28493	down	Cellular Component: cell part (GO:0044464);; Biological Process: establishment of localization (GO:0051234);;	--	--	phosphatidylinositol/phosphatidylcholine transfer protein SFH6 isoform X1 [Oryza sativa Japonica Group]
Os02g0617600	0.0463425	-1.63829	down	Cellular Component: protein serine/threonine phosphatase complex (GO:0008287);; Biological Process: regulation of phosphoprotein phosphatase activity (GO:0043666);;	K04354|0|osa:9266142|serine/threonine protein phosphatase 2A 55 kDa regulatory subunit B beta isoform isoform X1	mRNA surveillance pathway (ko03015)	serine/threonine protein phosphatase 2A 55 kDa regulatory subunit B beta isoform isoform X1 [Oryza sativa Japonica Group]
Os11g0704600	0.009289	3.53715	up	Biological Process: response to stress (GO:0006950);; Molecular Function: beta-glucosidase activity (GO:0008422);; Biological Process: primary metabolic process (GO:0044238);;	--	--	glucan endo-1,3-beta-glucosidase [Oryza sativa Japonica Group]
Os03g0125100	0.00868512	2.10412	up	Molecular Function: catalytic activity (GO:0003824);; Biological Process: fatty acid metabolic process (GO:0006631);; Cellular Component: plastid (GO:0009536);; Biological Process: carotenoid biosynthetic process (GO:0016117);; Cellular Component: intrinsic component of membrane (GO:0031224);; Biological Process: terpene metabolic process (GO:0042214);; Molecular Function: transition metal ion bi…	K15746|3.27984e-119|osa:4331460|beta-carotene hydroxylase 2, chloroplastic	Carotenoid biosynthesis (ko00906)	beta-carotene hydroxylase 2, chloroplastic [Oryza sativa Japonica Group]
Os08g0101700	0.0448786	-1.54183	down	--	K08360|1.54722e-93|osa:4344421|ascorbate-specific transmembrane electron transporter 1	--	ascorbate-specific transmembrane electron transporter 1 [Oryza sativa Japonica Group]
Os07g0162400	0.0327118	1.37158	up	--	--	--	probable carboxylesterase 15 [Oryza sativa Japonica Group]
Os11g0672300	0.0339525	-1.65329	down	--	--	--	cell number regulator 13 [Oryza sativa Japonica Group]
Os08g0425000	8.25e-05	-1.63392	down	--	--	--	uncharacterized protein LOC4345609 [Oryza sativa Japonica Group]
Os12g0581900	8.79e-08	-2.84709	down	Molecular Function: oxidoreductase activity (GO:0016491);; Molecular Function: metal ion binding (GO:0046872);;	--	--	zinc finger protein 7 [Oryza sativa Japonica Group]
Os04g0486950	1.71e-08	5.77027	up	Cellular Component: peroxisome (GO:0005777);; Biological Process: citrate metabolic process (GO:0006101);; Biological Process: cellular carbohydrate metabolic process (GO:0044262);; Molecular Function: transferase activity, transferring acyl groups, acyl groups converted into alkyl on transfer (GO:0046912);;	K01638|0|osa:9268154|malate synthase	Pyruvate metabolism (ko00620);; Glyoxylate and dicarboxylate metabolism (ko00630);; Carbon metabolism (ko01200)	malate synthase [Oryza sativa Japonica Group]
Os11g0177200	0.00350857	-1.61253	down	--	--	--	uncharacterized protein LOC9268590 [Oryza sativa Japonica Group]
Os09g0115466	0.017937	1.96005	up	Molecular Function: nucleic acid binding (GO:0003676);; Molecular Function: small molecule binding (GO:0036094);; Cellular Component: intracellular part (GO:0044424);;	K13126|0|osa:4346409|polyadenylate-binding protein 2	RNA transport (ko03013);; mRNA surveillance pathway (ko03015);; RNA degradation (ko03018)	polyadenylate-binding protein 2 [Oryza sativa Japonica Group]
Os01g0642000	0.00268016	2.61848	up	Molecular Function: hydrolase activity, acting on ester bonds (GO:0016788);; Cellular Component: intrinsic component of membrane (GO:0031224);; Cellular Component: Golgi apparatus part (GO:0044431);;	K15889|0|osa:4326560|probable isoprenylcysteine alpha-carbonyl methylesterase ICMEL2 isoform X1	Terpenoid backbone biosynthesis (ko00900)	probable isoprenylcysteine alpha-carbonyl methylesterase ICMEL2 isoform X2 [Oryza sativa Japonica Group]
Os04g0650700	0.0103868	-1.75021	down	Molecular Function: hydrolase activity, acting on carbon-nitrogen (but not peptide) bonds, in linear amides (GO:0016811);;	K13051|1.15451e-132|osa:4337229|probable isoaspartyl peptidase/L-asparaginase 2	Alanine, aspartate and glutamate metabolism (ko00250);; Cyanoamino acid metabolism (ko00460)	Os04g0650700, partial [Oryza sativa Japonica Group]
Os07g0534700	2.53e-05	-2.09789	down	Molecular Function: protein kinase activity (GO:0004672);; Biological Process: cellular protein modification process (GO:0006464);; Biological Process: phosphate-containing compound metabolic process (GO:0006796);; Cellular Component: intrinsic component of membrane (GO:0031224);; Molecular Function: purine ribonucleoside binding (GO:0032550);;	--	--	cysteine-rich receptor-like protein kinase 6 isoform X2 [Oryza sativa Japonica Group]
Os01g0717400	0.0220353	-2.09545	down	Molecular Function: lyase activity (GO:0016829);; Cellular Component: intrinsic component of membrane (GO:0031224);;	--	--	hypothetical protein OsI_03520 [Oryza sativa Indica Group]
Os05g0443500	0.0015996	-1.33444	down	Biological Process: generation of precursor metabolites and energy (GO:0006091);; Cellular Component: plastid (GO:0009536);; Biological Process: vesicle-mediated transport (GO:0016192);; Molecular Function: cation binding (GO:0043169);; Biological Process: single-organism metabolic process (GO:0044710);; Molecular Function: iron-sulfur cluster binding (GO:0051536);;	K02639|5.93067e-101|osa:4338930|ferredoxin-6, chloroplastic	Photosynthesis (ko00195)	ferredoxin-6, chloroplastic [Oryza sativa Japonica Group]
Os03g0184550	0.0115344	2.74437	up	Cellular Component: intracellular membrane-bounded organelle (GO:0043231);; Molecular Function: cofactor binding (GO:0048037);;	K15891|0|osa:9269735|putative dihydroflavonol-4-reductase	Terpenoid backbone biosynthesis (ko00900);; Sesquiterpenoid and triterpenoid biosynthesis (ko00909)	uncharacterized protein LOC9269735 [Oryza sativa Japonica Group]
Os05g0508300	0.0150858	1.18395	up	--	--	--	low-temperature-induced cysteine proteinase [Oryza sativa Japonica Group]
Os01g0836600	0.0357249	-1.94654	down	--	--	--	ABC transporter G family member 6 [Oryza sativa Japonica Group]
Os04g0578200	0.0312417	-1.40824	down	Cellular Component: intracellular membrane-bounded organelle (GO:0043231);;	--	--	Os04g0578200 [Oryza sativa Japonica Group]
Os06g0501900	0.0347811	2.77573	up	--	--	--	cytochrome P450 76M5-like [Oryza sativa Japonica Group]
Os09g0549450	0.00306367	-1.81474	down	--	--	--	hypothetical protein OsJ_30240 [Oryza sativa Japonica Group]
Os03g0854000	0.00240106	-1.46236	down	--	K19761|2.84183e-112|osa:4334822|putative gamma-glutamylcyclotransferase At3g02910	--	putative gamma-glutamylcyclotransferase At3g02910 [Oryza sativa Japonica Group]
Os08g0468700	0.00024994	-1.98267	down	Biological Process: generation of precursor metabolites and energy (GO:0006091);; Molecular Function: nitrate reductase activity (GO:0008940);; Biological Process: nitrate metabolic process (GO:0042126);; Biological Process: cellular nitrogen compound biosynthetic process (GO:0044271);; Molecular Function: tetrapyrrole binding (GO:0046906);; Molecular Function: transition metal ion binding (GO:00…	K10534|0|osa:4345798|nitrate reductase [NADH] 1-like	Nitrogen metabolism (ko00910)	nitrate reductase [NADH] 1-like [Oryza sativa Japonica Group]
Os04g0555300	0.037876	1.87309	up	--	--	--	Os04g0555300, partial [Oryza sativa Japonica Group]
Os07g0166700	0.0495526	-1.77791	down	Biological Process: cellular protein modification process (GO:0006464);; Biological Process: phosphate-containing compound metabolic process (GO:0006796);; Molecular Function: kinase activity (GO:0016301);; Cellular Component: intrinsic component of membrane (GO:0031224);; Molecular Function: purine ribonucleoside binding (GO:0032550);;	--	--	probable inactive leucine-rich repeat receptor-like protein kinase At3g03770 [Oryza sativa Japonica Group]
Os05g0374200	8.86e-05	-3.81181	down	Molecular Function: nucleotide binding (GO:0000166);; Biological Process: cellular aromatic compound metabolic process (GO:0006725);; Molecular Function: oxidoreductase activity, acting on the CH-NH group of donors (GO:0016645);; Cellular Component: extracellular region part (GO:0044421);; Biological Process: single-organism metabolic process (GO:0044710);;	K00279|0|osa:4338605|cytokinin dehydrogenase 9	Zeatin biosynthesis (ko00908)	cytokinin dehydrogenase 9 [Oryza sativa Japonica Group]
Os11g0147800	0.000456961	-2.4661	down	--	--	--	stem-specific protein TSJT1 [Oryza sativa Japonica Group]
Os08g0467500	2.43e-05	5.88954	up	Biological Process: response to acid chemical (GO:0001101);; Cellular Component: intrinsic component of membrane (GO:0031224);; Cellular Component: intracellular membrane-bounded organelle (GO:0043231);;	K17279|1.54534e-59|osa:4345793|protein HVA22	--	Os08g0467500, partial [Oryza sativa Japonica Group]
Os06g0196700	0.0056511	3.61859	up	Molecular Function: nucleic acid binding (GO:0003676);; Biological Process: transcription, DNA-templated (GO:0006351);; Biological Process: hormone-mediated signaling pathway (GO:0009755);; Cellular Component: intracellular membrane-bounded organelle (GO:0043231);;	--	--	auxin response factor 16 isoform X1 [Oryza sativa Japonica Group]
xxx_newGene_11666	0.0142032	1.50358	up	Cellular Component: intrinsic component of membrane (GO:0031224);;	--	--	Os09g0115850, partial [Oryza sativa Japonica Group]
Os03g0799900	0.0396678	-1.40698	down	Cellular Component: intrinsic component of membrane (GO:0031224);; Cellular Component: intracellular membrane-bounded organelle (GO:0043231);;	--	--	transducin family protein, putative, expressed [Oryza sativa Japonica Group]
Os12g0121150	0.0141521	1.61478	up	Biological Process: metabolic process (GO:0008152);; Molecular Function: transferase activity, transferring phosphorus-containing groups (GO:0016772);; Cellular Component: intrinsic component of membrane (GO:0031224);;	K00967|1.48507e-161|osa:4351359|ethanolamine-phosphate cytidylyltransferase	Phosphonate and phosphinate metabolism (ko00440);; Glycerophospholipid metabolism (ko00564)	hypothetical protein OsJ_32765 [Oryza sativa Japonica Group]
Os02g0703300	0.000205706	-1.28442	down	--	--	--	uncharacterized protein LOC4330447 [Oryza sativa Japonica Group]
Os02g0139100	0.00322229	2.44526	up	Molecular Function: protein binding (GO:0005515);; Molecular Function: enzyme activator activity (GO:0008047);; Biological Process: regulation of ATPase activity (GO:0043462);;	--	--	uncharacterized protein LOC4328250 [Oryza sativa Japonica Group]
Os12g0635400	0.0168681	3.05695	up	--	--	--	VQ motif-containing protein 29 [Oryza sativa Japonica Group]
xxx_newGene_11459	1.5e-09	2.92042	up	Molecular Function: DNA binding (GO:0003677);; Biological Process: gene expression (GO:0010467);; Cellular Component: intrinsic component of membrane (GO:0031224);; Molecular Function: 5'-3' RNA polymerase activity (GO:0034062);; Cellular Component: protein complex (GO:0043234);; Biological Process: cell cycle DNA replication (GO:0044786);;	--	--	hypothetical protein [Oryza sativa Japonica Group]
Os05g0537300	0.0238985	-1.17637	down	Molecular Function: cytoskeletal protein binding (GO:0008092);; Cellular Component: actin cytoskeleton (GO:0015629);; Molecular Function: nucleoside-triphosphatase activity (GO:0017111);; Molecular Function: purine ribonucleoside binding (GO:0032550);;	K10357|0|osa:4339453|myosin-17 isoform X1	--	hypothetical protein OsJ_19360 [Oryza sativa Japonica Group]
Os12g0460100	0.00289986	2.16633	up	Cellular Component: intrinsic component of membrane (GO:0031224);;	--	--	uncharacterized protein LOC9269225 [Oryza sativa Japonica Group]
Os07g0534100	7.14e-05	3.41357	up	Biological Process: cellular protein modification process (GO:0006464);; Biological Process: phosphate-containing compound metabolic process (GO:0006796);; Cellular Component: membrane (GO:0016020);; Molecular Function: kinase activity (GO:0016301);; Molecular Function: purine ribonucleoside binding (GO:0032550);;	--	--	Os07g0534100 [Oryza sativa Japonica Group]
Os08g0468801	0.000324566	-2.04782	down	Biological Process: generation of precursor metabolites and energy (GO:0006091);; Molecular Function: nitrate reductase activity (GO:0008940);; Biological Process: nitrate metabolic process (GO:0042126);; Biological Process: cellular nitrogen compound biosynthetic process (GO:0044271);; Molecular Function: tetrapyrrole binding (GO:0046906);; Molecular Function: transition metal ion binding (GO:00…	K10534|0|osa:4345798|nitrate reductase [NADH] 1-like	Nitrogen metabolism (ko00910)	Os08g0468100, partial [Oryza sativa Japonica Group]
Os09g0492700	0.00565588	4.2638	up	--	K00021|0|osa:4347443|3-hydroxy-3-methylglutaryl-coenzyme A reductase 3-like	Terpenoid backbone biosynthesis (ko00900)	3-hydroxy-3-methylglutaryl-coenzyme A reductase 3-like [Oryza sativa Japonica Group]
Os06g0651200	1.48e-05	3.35084	up	--	--	--	uncharacterized protein LOC4341691 [Oryza sativa Japonica Group]
Os12g0428000	3.12e-20	9.4591	up	--	--	--	Os12g0428000, partial [Oryza sativa Japonica Group]
Os03g0737000	0.000245748	1.54002	up	Biological Process: cellular homeostasis (GO:0019725);; Cellular Component: intracellular membrane-bounded organelle (GO:0043231);; Molecular Function: transition metal ion binding (GO:0046914);;	--	--	Os03g0737000, partial [Oryza sativa Japonica Group]
Os02g0262800	0.00273144	-1.09561	down	Molecular Function: purine ribonucleoside binding (GO:0032550);;	--	--	disease resistance protein RGA2 [Oryza sativa Japonica Group]
Os05g0404500	1.5e-08	3.13942	up	--	--	--	Os05g0404500 [Oryza sativa Japonica Group]
Os05g0488600	1.25e-05	-2.94777	down	Molecular Function: nucleic acid binding (GO:0003676);; Biological Process: transcription, DNA-templated (GO:0006351);; Cellular Component: intracellular membrane-bounded organelle (GO:0043231);;	--	--	myb-related protein 2 isoform X1 [Oryza sativa Japonica Group]
Os04g0605900	0.000145535	1.64746	up	--	K02937|8.18004e-122|osa:4336914|60S ribosomal protein L7-3	Ribosome (ko03010)	60S ribosomal protein L7-3 [Oryza sativa Japonica Group]
Os02g0718600	0.000260514	5.86532	up	--	--	--	Os02g0718600, partial [Oryza sativa Japonica Group]
Os01g0159400	0.0011795	1.79157	up	--	K00232|0|osa:4324062|acyl-coenzyme A oxidase 4, peroxisomal	Fatty acid degradation (ko00071);; beta-Alanine metabolism (ko00410);; alpha-Linolenic acid metabolism (ko00592);; Propanoate metabolism (ko00640);; Biosynthesis of unsaturated fatty acids (ko01040);; Carbon metabolism (ko01200);; Fatty acid metabolism (ko01212);; Peroxisome (ko04146)	acyl-coenzyme A oxidase 4, peroxisomal isoform X2 [Oryza sativa Japonica Group]
Os04g0671300	0.019061	-1.83794	down	Molecular Function: catalytic activity (GO:0003824);; Biological Process: single-organism metabolic process (GO:0044710);;	K17839|0|osa:4337360|probable polyamine oxidase 4	Arginine and proline metabolism (ko00330);; beta-Alanine metabolism (ko00410);; Pantothenate and CoA biosynthesis (ko00770)	probable polyamine oxidase 4 [Oryza sativa Japonica Group]
Os03g0723400	3.76e-10	10.2387	up	--	--	--	hapless 2 isoform X2 [Oryza sativa Japonica Group]
Os11g0635500	0.0119296	-3.03941	down	--	--	--	hypothetical protein EE612_056802 [Oryza sativa]
xxx_newGene_653	0.0088972	-1.94136	down	Cellular Component: intrinsic component of membrane (GO:0031224);; Molecular Function: transition metal ion binding (GO:0046914);;	--	--	RING-H2 finger protein ATL74 [Oryza sativa Japonica Group]
Os03g0174800	0.00371751	2.31119	up	Cellular Component: intrinsic component of membrane (GO:0031224);;	--	--	Os03g0174800, partial [Oryza sativa Japonica Group]
Os02g0704800	0.000725343	2.35937	up	--	K00611|0|osa:9269231|ornithine carbamoyltransferase, chloroplastic isoform X1	Arginine biosynthesis (ko00220);; Biosynthesis of amino acids (ko01230)	ornithine carbamoyltransferase, chloroplastic isoform X1 [Oryza sativa Japonica Group]
Os01g0867600	0.00293571	1.05515	up	--	K05841|0|osa:4325046|sterol 3-beta-glucosyltransferase UGT80B1	--	sterol 3-beta-glucosyltransferase UGT80B1 [Oryza sativa Japonica Group]
Os05g0523300	0.00271162	3.03272	up	Molecular Function: protein binding (GO:0005515);; Biological Process: transcription, DNA-templated (GO:0006351);; Biological Process: translation (GO:0006412);; Biological Process: hormone-mediated signaling pathway (GO:0009755);; Cellular Component: intracellular membrane-bounded organelle (GO:0043231);;	K14484|0|osa:4339365|auxin-responsive protein IAA18 isoform X4	Plant hormone signal transduction (ko04075)	auxin-responsive protein IAA18 isoform X2 [Oryza sativa Japonica Group]
Os07g0683600	7.41e-09	5.28283	up	--	--	--	Os07g0683600 [Oryza sativa Japonica Group]
Os10g0436900	0.000897276	-2.03462	down	Biological Process: transport (GO:0006810);; Cellular Component: intrinsic component of membrane (GO:0031224);;	K13754|0|osa:4348706|cation/calcium exchanger 1	--	cation/calcium exchanger 1 [Oryza sativa Japonica Group]
Os01g0723600	0.0264109	3.08069	up	Biological Process: nucleotide metabolic process (GO:0009117);; Cellular Component: plastid (GO:0009536);; Molecular Function: diphosphotransferase activity (GO:0016778);; Molecular Function: purine ribonucleoside binding (GO:0032550);; Molecular Function: metal ion binding (GO:0046872);;	--	--	ribose-phosphate pyrophosphokinase 3, chloroplastic [Oryza sativa Japonica Group]
Os01g0730800	0.000176872	-2.35578	down	Cellular Component: plastid envelope (GO:0009526);; Cellular Component: intrinsic component of membrane (GO:0031224);;	K13348|5.81041e-131|osa:4324427|protein Mpv17	Peroxisome (ko04146)	protein Mpv17 [Oryza sativa Japonica Group]
Os08g0200100	1.56e-05	-3.30838	down	Biological Process: fatty acid metabolic process (GO:0006631);; Cellular Component: plastid (GO:0009536);; Molecular Function: oxidoreductase activity, acting on paired donors, with oxidation of a pair of donors resulting in the reduction of molecular oxygen to two molecules of water (GO:0016717);; Molecular Function: cation binding (GO:0043169);;	K03921|0|osa:4344897|acyl-[acyl-carrier-protein] desaturase 7, chloroplastic	Fatty acid biosynthesis (ko00061);; Biosynthesis of unsaturated fatty acids (ko01040);; Fatty acid metabolism (ko01212)	acyl-[acyl-carrier-protein] desaturase 7, chloroplastic isoform X1 [Oryza sativa Japonica Group]
Os09g0320400	0.01954	-1.47324	down	Biological Process: transport (GO:0006810);; Cellular Component: intrinsic component of membrane (GO:0031224);;	--	--	Os09g0320201, partial [Oryza sativa Japonica Group]
Os10g0467000	0.000545793	-1.37125	down	--	--	--	uncharacterized protein LOC4348848 [Oryza sativa Japonica Group]
Os03g0305800	3.84e-06	-3.40019	down	Molecular Function: transferase activity (GO:0016740);; Cellular Component: intrinsic component of membrane (GO:0031224);; Cellular Component: Golgi apparatus part (GO:0044431);;	--	--	probable glycosyltransferase 4 [Oryza sativa Japonica Group]
Os03g0571700	4.83e-05	-2.17577	down	Molecular Function: secondary active transmembrane transporter activity (GO:0015291);; Biological Process: drug transport (GO:0015893);; Cellular Component: intrinsic component of membrane (GO:0031224);;	--	--	Os03g0571700 [Oryza sativa Japonica Group]
Os05g0550800	0.000390987	4.82845	up	--	--	--	LEAF RUST 10 DISEASE-RESISTANCE LOCUS RECEPTOR-LIKE PROTEIN KINASE-like 1.2 isoform X1 [Oryza sativa Japonica Group]
Os04g0643200	0.0087299	1.04591	up	--	--	--	Os04g0643200 [Oryza sativa Japonica Group]
Os01g0951500	0.0309486	-1.21666	down	--	--	--	cytochrome P450 94B3 [Oryza sativa Japonica Group]
Os02g0161900	0.0474904	1.43805	up	Cellular Component: intracellular membrane-bounded organelle (GO:0043231);;	--	--	Os02g0161900, partial [Oryza sativa Japonica Group]
Os04g0506900	0.0359758	3.1465	up	--	--	--	uncharacterized protein LOC4336344 isoform X2 [Oryza sativa Japonica Group]
Os03g0299800	0.0198048	3.47354	up	Cellular Component: intrinsic component of membrane (GO:0031224);; Cellular Component: intracellular membrane-bounded organelle (GO:0043231);;	--	--	uncharacterized protein LOC4332562 [Oryza sativa Japonica Group]
Os11g0143300	1.95e-06	-2.76211	down	Molecular Function: signal transducer activity (GO:0004871);; Biological Process: transcription, DNA-templated (GO:0006351);; Biological Process: hormone-mediated signaling pathway (GO:0009755);; Biological Process: intracellular signal transduction (GO:0035556);; Cellular Component: intracellular membrane-bounded organelle (GO:0043231);;	K14492|2.90082e-121|osa:4349747|two-component response regulator ORR9	Plant hormone signal transduction (ko04075)	two-component response regulator ORR9 [Oryza sativa Japonica Group]
Os08g0139700	0.000216049	-2.87105	down	Molecular Function: carbon-oxygen lyase activity, acting on phosphates (GO:0016838);; Molecular Function: metal ion binding (GO:0046872);;	--	--	Os08g0139700, partial [Oryza sativa Japonica Group]
Os07g0582400	4.09e-07	-2.07379	down	--	--	--	putative sugar transporter [Oryza sativa]
Os10g0378300	0.00902712	1.37114	up	--	K03926|7.4812e-68|osa:4348499|protein CutA 1, chloroplastic	--	Os10g0378300, partial [Oryza sativa Japonica Group]
Os10g0442400	4.63e-09	2.79958	up	Molecular Function: transferase activity, transferring glycosyl groups (GO:0016757);;	--	--	UDP-glycosyltransferase 86A1 isoform X2 [Oryza sativa Japonica Group]
Os01g0542100	0.047815	-1.02264	down	--	--	--	hypothetical protein [Oryza sativa Japonica Group]
Os07g0668300	0.0102452	1.84059	up	Molecular Function: hydrolase activity (GO:0016787);;	--	--	GDSL esterase/lipase At2g23540 [Oryza sativa Japonica Group]
Os01g0721400	0.0327901	1.9739	up	Molecular Function: purine ribonucleoside binding (GO:0032550);;	--	--	putative disease resistance protein RGA4 [Oryza sativa Japonica Group]
Os04g0583200	0.0140596	3.687	up	--	--	--	OSJNBa0088A01.13 [Oryza sativa Japonica Group]
Os09g0546900	4.72e-05	-3.35582	down	--	--	--	auxin-responsive protein SAUR36-like [Oryza sativa Japonica Group]
Os04g0541700	8.14e-06	3.26993	up	Molecular Function: nucleic acid binding transcription factor activity (GO:0001071);; Molecular Function: DNA binding (GO:0003677);; Biological Process: transcription, DNA-templated (GO:0006351);; Cellular Component: intracellular membrane-bounded organelle (GO:0043231);;	--	--	homeobox-leucine zipper protein HOX22 [Oryza sativa Japonica Group]
Os02g0766600	0.000949963	-2.73188	down	--	--	--	uncharacterized protein LOC4330837 [Oryza sativa Japonica Group]
Os06g0668200	9.82e-07	4.7657	up	Cellular Component: extracellular region (GO:0005576);; Cellular Component: cell-cell junction (GO:0005911);; Biological Process: pyruvate metabolic process (GO:0006090);; Biological Process: phosphate-containing compound metabolic process (GO:0006796);; Cellular Component: plastid stroma (GO:0009532);; Cellular Component: membrane (GO:0016020);; Molecular Function: kinase activity (GO:0016301);;…	K00927|0|osa:4341792|phosphoglycerate kinase, cytosolic	Glycolysis / Gluconeogenesis (ko00010);; Carbon fixation in photosynthetic organisms (ko00710);; Carbon metabolism (ko01200);; Biosynthesis of amino acids (ko01230)	phosphoglycerate kinase, cytosolic [Oryza sativa Japonica Group]
Os09g0507800	4.45e-05	1.43857	up	--	K02936|1.47108e-146|osa:4345279|60S ribosomal protein L7a	Ribosome (ko03010)	60S ribosomal protein L7a-1 [Oryza sativa Japonica Group]
Os03g0275300	0.011607	3.0815	up	Molecular Function: transition metal ion binding (GO:0046914);;	--	--	E3 ubiquitin-protein ligase XB3-like [Oryza sativa Japonica Group]
Os06g0550000	0.0185911	1.38517	up	--	--	--	Os06g0550000, partial [Oryza sativa Japonica Group]
Os01g0269500	0.046021	1.04033	up	Biological Process: response to stress (GO:0006950);; Biological Process: programmed cell death (GO:0012501);; Cellular Component: intracellular ribonucleoprotein complex (GO:0030529);; Molecular Function: purine ribonucleoside binding (GO:0032550);;	--	--	hypothetical protein EE612_001689, partial [Oryza sativa]
Os01g0124650	4.36e-09	9.28124	up	Molecular Function: endopeptidase inhibitor activity (GO:0004866);; Biological Process: negative regulation of peptidase activity (GO:0010466);;	--	--	putative Bowman Birk trypsin inhibitor [Oryza sativa Indica Group]
Os02g0678400	0.000705132	-1.41581	down	--	K12451|0|osa:9267465|bifunctional dTDP-4-dehydrorhamnose 3,5-epimerase/dTDP-4-dehydrorhamnose reductase	Amino sugar and nucleotide sugar metabolism (ko00520)	bifunctional dTDP-4-dehydrorhamnose 3,5-epimerase/dTDP-4-dehydrorhamnose reductase [Oryza sativa Japonica Group]
Os11g0602600	0.00279146	1.37231	up	--	K02997|9.91307e-129|osa:4331662|40S ribosomal protein S9-2	Ribosome (ko03010)	40S ribosomal protein S9-2 [Oryza sativa Japonica Group]
Os08g0200600	0.00124626	-3.06219	down	Molecular Function: nucleic acid binding (GO:0003676);; Biological Process: transcription, DNA-templated (GO:0006351);; Cellular Component: intracellular membrane-bounded organelle (GO:0043231);;	--	--	Os08g0200600, partial [Oryza sativa Japonica Group]
Os01g0733200	0.0010954	5.44682	up	Molecular Function: nucleic acid binding transcription factor activity (GO:0001071);; Biological Process: response to acid chemical (GO:0001101);; Molecular Function: DNA binding (GO:0003677);; Biological Process: transcription, DNA-templated (GO:0006351);; Biological Process: response to stress (GO:0006950);; Cellular Component: intracellular membrane-bounded organelle (GO:0043231);;	K09419|4.22406e-159|osa:4324158|heat stress transcription factor C-1b	--	heat stress transcription factor C-1b [Oryza sativa Japonica Group]
Os08g0468200	0.00263528	-1.85479	down	Biological Process: generation of precursor metabolites and energy (GO:0006091);; Molecular Function: nitrate reductase activity (GO:0008940);; Biological Process: nitrate metabolic process (GO:0042126);; Biological Process: cellular nitrogen compound biosynthetic process (GO:0044271);; Molecular Function: tetrapyrrole binding (GO:0046906);; Molecular Function: transition metal ion binding (GO:00…	K10534|0|osa:4345798|nitrate reductase [NADH] 1-like	Nitrogen metabolism (ko00910)	Os08g0468100, partial [Oryza sativa Japonica Group]
Os08g0530200	0.0423429	1.05863	up	Molecular Function: structural molecule activity (GO:0005198);; Biological Process: gene expression (GO:0010467);; Cellular Component: ribosomal subunit (GO:0044391);;	K02880|2.34441e-123|osa:4346123|60S ribosomal protein L17	Ribosome (ko03010)	60S ribosomal protein L17 [Oryza sativa Japonica Group]
Os12g0126000	0.0374272	-1.5531	down	Molecular Function: secondary active transmembrane transporter activity (GO:0015291);; Biological Process: drug transport (GO:0015893);; Cellular Component: intrinsic component of membrane (GO:0031224);;	K03327|0|osa:4351384|protein DETOXIFICATION 21	--	protein DETOXIFICATION 21 [Oryza sativa Japonica Group]
Os05g0557000	0.000496355	1.44466	up	Molecular Function: structural molecule activity (GO:0005198);; Biological Process: gene expression (GO:0010467);; Cellular Component: intracellular ribonucleoprotein complex (GO:0030529);; Molecular Function: cation binding (GO:0043169);;	K02921|5.4788e-58|zma:100280393|uncharacterized protein LOC100280393	Ribosome (ko03010)	60S ribosomal protein L37a isoform 2 [Zea mays]
Os01g0850050	0.0326919	-1.51336	down	--	--	--	Os01g0850050, partial [Oryza sativa Japonica Group]
Os06g0698748	3.71e-08	3.05934	up	Cellular Component: intracellular membrane-bounded organelle (GO:0043231);;	--	--	unnamed protein product [Oryza sativa Japonica Group]
Os06g0710700	2.08e-06	5.29475	up	--	K19861|0|osa:4342032|benzyl alcohol O-benzoyltransferase	--	benzyl alcohol O-benzoyltransferase [Oryza sativa Japonica Group]
Os04g0645700	3.74e-06	2.03827	up	--	--	--	Os04g0645700, partial [Oryza sativa Japonica Group]
Os06g0296100	0.0238985	2.55509	up	--	--	--	Os06g0296100 [Oryza sativa Japonica Group]
Os07g0499800	0.0351625	1.76366	up	Molecular Function: transferase activity, transferring glycosyl groups (GO:0016757);; Cellular Component: intracellular membrane-bounded organelle (GO:0043231);; Molecular Function: transition metal ion binding (GO:0046914);;	K01931|0|osa:4343310|uncharacterized protein LOC4343310	--	uncharacterized protein LOC4343310 [Oryza sativa Japonica Group]
Os05g0444300	0.0101574	-1.92607	down	Cellular Component: intrinsic component of membrane (GO:0031224);; Biological Process: establishment of localization (GO:0051234);;	K15287|0|osa:4338935|solute carrier family 35 member F2	--	solute carrier family 35 member F2 [Oryza sativa Japonica Group]
Os07g0662500	0.0345073	1.22811	up	Biological Process: translation (GO:0006412);; Molecular Function: translation factor activity, RNA binding (GO:0008135);; Cellular Component: protein complex (GO:0043234);;	K03232|7.23135e-108|osa:4344188|elongation factor 1-beta	--	elongation factor 1-beta [Oryza sativa Japonica Group]
Os03g0809900	0.00610515	1.65069	up	--	K12876|2.19864e-104|osa:4334528|RNA-binding protein 8A	RNA transport (ko03013);; mRNA surveillance pathway (ko03015);; Spliceosome (ko03040)	RNA-binding protein Y14B [Oryza sativa Japonica Group]
Os08g0547300	3.35e-10	-3.65165	down	Molecular Function: monooxygenase activity (GO:0004497);; Cellular Component: intrinsic component of membrane (GO:0031224);; Biological Process: single-organism metabolic process (GO:0044710);; Molecular Function: tetrapyrrole binding (GO:0046906);; Molecular Function: transition metal ion binding (GO:0046914);;	--	--	cytochrome P450 78A9 [Oryza sativa Japonica Group]
Os06g0703800	0.0404495	2.58573	up	Molecular Function: protein binding (GO:0005515);; Molecular Function: enzyme activator activity (GO:0008047);; Biological Process: regulation of ATPase activity (GO:0043462);;	--	--	uncharacterized protein LOC4341989 [Oryza sativa Japonica Group]
Os02g0575700	0.00748304	-1.58643	down	--	--	--	loricrin [Oryza sativa Japonica Group]
Os04g0453200	8.8e-05	-2.02317	down	--	--	--	sugar transport protein MST1-like [Oryza sativa Japonica Group]
Os03g0341600	0.029395	-2.13735	down	--	--	--	phylloplanin [Oryza sativa Japonica Group]
Os05g0188100	0.0227035	1.32809	up	--	--	--	uncharacterized protein LOC4338014 [Oryza sativa Japonica Group]
Os01g0511100	1.03e-06	7.01105	up	Biological Process: response to stimulus (GO:0050896);;	--	--	universal stress protein A-like protein [Oryza sativa Japonica Group]
Os11g0116300	0.00659299	-1.97591	down	Biological Process: flavonoid metabolic process (GO:0009812);; Molecular Function: intramolecular lyase activity (GO:0016872);;	K01859|9.47249e-138|osa:4349607|probable chalcone--flavonone isomerase 3	Flavonoid biosynthesis (ko00941)	probable chalcone--flavonone isomerase 3 [Oryza sativa Japonica Group]
Os08g0546800	1.92e-09	7.27826	up	Molecular Function: nucleic acid binding transcription factor activity (GO:0001071);; Molecular Function: DNA binding (GO:0003677);; Biological Process: transcription, DNA-templated (GO:0006351);; Cellular Component: intracellular membrane-bounded organelle (GO:0043231);;	--	--	heat stress transcription factor B-2b isoform X2 [Oryza sativa Japonica Group]
Os10g0546400	2.78e-08	3.95816	up	--	--	--	cyclin-dependent protein kinase inhibitor SMR1 [Oryza sativa Japonica Group]
Os02g0557800	1.77e-20	-4.26736	down	Molecular Function: signal transducer activity (GO:0004871);; Cellular Component: cytoplasm (GO:0005737);; Biological Process: transcription, DNA-templated (GO:0006351);; Biological Process: hormone-mediated signaling pathway (GO:0009755);; Cellular Component: membrane (GO:0016020);; Biological Process: intracellular signal transduction (GO:0035556);; Cellular Component: intracellular membrane-bo…	K14492|9.65098e-120|osa:4329677|two-component response regulator ORR2	Plant hormone signal transduction (ko04075)	Os02g0557800, partial [Oryza sativa Japonica Group]
Os04g0652400	0.0421134	-1.35636	down	--	K17471|0|osa:4337235|probable sulfate transporter 3.3	--	probable sulfate transporter 3.3 [Oryza sativa Japonica Group]
Os01g0614900	0.00562658	4.03833	up	--	K08337|0|osa:4326644|ubiquitin-like modifier-activating enzyme atg7 isoform X1	Autophagy - other (ko04136)	ubiquitin-like modifier-activating enzyme atg7 isoform X1 [Oryza sativa Japonica Group]
Os07g0592600	0.0029441	5.32665	up	--	K14487|0|osa:4343785|probable indole-3-acetic acid-amido synthetase GH3.8	Plant hormone signal transduction (ko04075)	probable indole-3-acetic acid-amido synthetase GH3.8 [Oryza sativa Japonica Group]
Os03g0711425	0.0442373	1.26223	up	--	K05236|0|osa:4333885|coatomer subunit alpha-1	--	coatomer subunit alpha-1 [Oryza sativa Japonica Group]
Os05g0501200	8.68e-07	-2.28265	down	Molecular Function: protein binding (GO:0005515);; Biological Process: transcription from RNA polymerase II promoter (GO:0006366);; Cellular Component: intracellular membrane-bounded organelle (GO:0043231);;	--	--	transcription factor bHLH68 isoform X2 [Oryza sativa Japonica Group]
Os01g0180400	4.6e-06	-2.25339	down	--	--	--	Os01g0180400, partial [Oryza sativa Japonica Group]
Os07g0644550	0.0271527	1.42402	up	--	--	--	probable cytochrome P450 313a3 [Oryza sativa Japonica Group]
Os04g0524600	1.71e-09	-1.85565	down	Biological Process: transport (GO:0006810);; Cellular Component: intrinsic component of membrane (GO:0031224);;	--	--	Os04g0524600 [Oryza sativa Japonica Group]
Os04g0628900	0.0171195	-1.40394	down	Molecular Function: kinase binding (GO:0019900);; Cellular Component: intracellular membrane-bounded organelle (GO:0043231);; Biological Process: single-organism cellular process (GO:0044763);; Biological Process: regulation of protein serine/threonine kinase activity (GO:0071900);;	--	--	RecName: Full=Cyclin-P1-1; Short=CycP1;1
Os12g0224000	0.00921957	2.59914	up	Biological Process: phosphate-containing compound metabolic process (GO:0006796);; Biological Process: G-protein coupled receptor signaling pathway (GO:0007186);; Molecular Function: kinase activity (GO:0016301);; Biological Process: root system development (GO:0022622);; Cellular Component: intrinsic component of membrane (GO:0031224);; Molecular Function: purine ribonucleoside binding (GO:00325…	--	--	Os12g0224000, partial [Oryza sativa Japonica Group]
Os09g0470000	0.000149487	-2.24672	down	--	--	--	Os09g0470000, partial [Oryza sativa Japonica Group]
Os07g0207400	0.00169367	1.44271	up	--	--	--	Os07g0207400, partial [Oryza sativa Japonica Group]
Os12g0181500	5.74e-05	-1.84611	down	--	--	--	hypothetical protein OsI_37698 [Oryza sativa Indica Group]
Os01g0752300	0.00824838	1.1073	up	--	K02882|6.17718e-129|osa:4327004|60S ribosomal protein L18a	Ribosome (ko03010)	PREDICTED: 60S ribosomal protein L18a [Oryza brachyantha]
Os09g0536400	0.0216964	-1.35225	down	Cellular Component: intrinsic component of membrane (GO:0031224);;	--	--	thaumatin-like protein 1 [Oryza sativa Japonica Group]
Os04g0665400	0.020476	1.35766	up	Biological Process: microtubule-based process (GO:0007017);; Cellular Component: microtubule cytoskeleton (GO:0015630);; Molecular Function: nucleoside-triphosphatase activity (GO:0017111);; Molecular Function: purine ribonucleoside binding (GO:0032550);; Cellular Component: intracellular membrane-bounded organelle (GO:0043231);;	K03531|0|osa:4337316|cell division protein FtsZ homolog 1, chloroplastic	--	cell division protein FtsZ homolog 1, chloroplastic [Oryza sativa Japonica Group]
Os03g0808350	4.33e-08	2.39861	up	--	--	--	remorin 4.1-like [Oryza sativa Japonica Group]
Os11g0671100	1.66e-09	3.68526	up	--	--	--	auxin-repressed protein-like protein ARP1, putative, expressed [Oryza sativa Japonica Group]
Os02g0613900	6.36e-08	-3.4949	down	Molecular Function: transferase activity, transferring pentosyl groups (GO:0016763);; Biological Process: purine nucleobase salvage (GO:0043096);; Cellular Component: intracellular part (GO:0044424);;	K00759|1.87768e-135|osa:4329972|adenine phosphoribosyltransferase 4	Purine metabolism (ko00230)	adenine phosphoribosyltransferase 4 [Oryza sativa Japonica Group]
Os04g0508500	2.07e-05	4.01146	up	Molecular Function: nucleic acid binding (GO:0003676);;	K09422|2.98564e-156|osa:4336355|transcription factor WER	--	transcription factor WER [Oryza sativa Japonica Group]
Os11g0126900	5.35e-06	3.1143	up	Molecular Function: nucleic acid binding (GO:0003676);; Biological Process: transcription, DNA-templated (GO:0006351);; Cellular Component: intracellular membrane-bounded organelle (GO:0043231);;	--	--	hypothetical protein OsI_34934 [Oryza sativa Indica Group]
Os02g0646500	0.00577259	-2.67348	down	--	K00128|0|osa:4330146|aldehyde dehydrogenase family 3 member F1	Glycolysis / Gluconeogenesis (ko00010);; Ascorbate and aldarate metabolism (ko00053);; Fatty acid degradation (ko00071);; Valine, leucine and isoleucine degradation (ko00280);; Lysine degradation (ko00310);; Arginine and proline metabolism (ko00330);; Histidine metabolism (ko00340);; Tryptophan metabolism (ko00380);; beta-Alanine metabolism (ko00410);; Glycerolipid metabolism (ko00561);; Pyruvate…	aldehyde dehydrogenase family 3 member F1 [Oryza sativa Japonica Group]
Os03g0720800	2.31e-05	2.4102	up	--	K09422|1.05004e-171|osa:4333934|transcriptional activator Myb	--	transcription factor MYB52 [Oryza sativa Japonica Group]
Os01g0130400	0.0029384	4.04729	up	Molecular Function: binding (GO:0005488);; Molecular Function: hydrolase activity, acting on glycosyl bonds (GO:0016798);; Biological Process: primary metabolic process (GO:0044238);;	K15925|0|osa:4325976|alpha-xylosidase 1	--	putative alpha-glucosidase [Oryza sativa Japonica Group]
Os06g0134000	0.00793717	1.45635	up	--	K02969|8.68345e-77|osa:4340027|40S ribosomal protein S20	Ribosome (ko03010)	40S ribosomal protein S20 [Oryza sativa Japonica Group]
Os11g0575900	0.000212865	-1.43725	down	Cellular Component: intrinsic component of membrane (GO:0031224);;	--	--	Os11g0575900, partial [Oryza sativa Japonica Group]
Os02g0591000	0.000484834	1.66683	up	--	--	--	Os02g0591000 [Oryza sativa Japonica Group]
Os01g0236300	0.00114464	-2.12312	down	Molecular Function: nucleic acid binding (GO:0003676);; Biological Process: transcription, DNA-templated (GO:0006351);; Biological Process: hormone-mediated signaling pathway (GO:0009755);; Cellular Component: intracellular membrane-bounded organelle (GO:0043231);;	--	--	auxin response factor 16, partial [Oryza sativa]
Os02g0278700	0.000398567	-3.00499	down	Cellular Component: plastid (GO:0009536);; Biological Process: gibberellin metabolic process (GO:0009685);; Molecular Function: carbon-oxygen lyase activity, acting on phosphates (GO:0016838);; Molecular Function: intramolecular lyase activity (GO:0016872);; Biological Process: terpene biosynthetic process (GO:0046246);; Molecular Function: metal ion binding (GO:0046872);;	K04120|0|osa:4329013|ent-copalyl diphosphate synthase 1, chloroplastic	Diterpenoid biosynthesis (ko00904)	ent-copalyl diphosphate synthase 1, chloroplastic [Oryza sativa Japonica Group]
Os09g0482500	0.00477463	-1.95822	down	Molecular Function: nucleic acid binding (GO:0003676);; Molecular Function: endopeptidase activity (GO:0004175);; Biological Process: protein metabolic process (GO:0019538);;	--	--	aspartyl protease family protein At5g10770 [Oryza sativa Japonica Group]
Os02g0765900	0.00713823	-2.90347	down	Cellular Component: extracellular region (GO:0005576);; Cellular Component: plastid stroma (GO:0009532);; Molecular Function: oxidoreductase activity, acting on other nitrogenous compounds as donors, iron-sulfur protein as acceptor (GO:0016664);; Biological Process: nitrate metabolic process (GO:0042126);; Molecular Function: cation binding (GO:0043169);; Molecular Function: tetrapyrrole binding …	K00366|0|osa:4326014|ferredoxin--nitrite reductase, chloroplastic	Nitrogen metabolism (ko00910)	ferredoxin--nitrite reductase, chloroplastic isoform X1 [Oryza sativa Japonica Group]
Os07g0493850	0.0368293	-1.03464	down	Cellular Component: intrinsic component of membrane (GO:0031224);;	--	--	Os07g0493850 [Oryza sativa Japonica Group]
Os02g0729100	0.0409687	-1.02148	down	--	--	--	protein trichome birefringence-like 19 [Oryza sativa Japonica Group]
Os08g0485900	0.0104635	-1.97823	down	Molecular Function: catalytic activity (GO:0003824);; Cellular Component: plastid envelope (GO:0009526);; Cellular Component: plastid stroma (GO:0009532);;	--	--	haloacid dehalogenase-like hydrolase domain-containing protein At4g39970 [Oryza sativa Japonica Group]
Os07g0656800	0.022488	-1.48847	down	Biological Process: metabolic process (GO:0008152);; Molecular Function: methyltransferase activity (GO:0008168);;	--	--	Os07g0656800 [Oryza sativa Japonica Group]
Os02g0709000	2.43e-05	-5.87922	down	Molecular Function: nuclease activity (GO:0004518);; Molecular Function: cation binding (GO:0043169);; Biological Process: nucleic acid metabolic process (GO:0090304);; Molecular Function: organic cyclic compound binding (GO:0097159);;	--	--	RNA exonuclease 4 [Oryza sativa Japonica Group]
Os04g0502800	0.021699	-1.24127	down	Biological Process: transport (GO:0006810);; Cellular Component: intrinsic component of membrane (GO:0031224);;	--	--	Os04g0502800, partial [Oryza sativa Japonica Group]
Os06g0125800	0.0293637	-1.59909	down	Molecular Function: catalytic activity (GO:0003824);; Cellular Component: integral component of plasma membrane (GO:0005887);; Biological Process: cell-substrate adhesion (GO:0031589);; Biological Process: protein modification by small protein conjugation (GO:0032446);; Molecular Function: transition metal ion binding (GO:0046914);;	K19045|0|osa:4339966|E3 ubiquitin ligase BIG BROTHER	--	E3 ubiquitin-protein ligase BIG BROTHER [Oryza sativa Japonica Group]
Os03g0381500	0.00184209	3.7171	up	Cellular Component: intrinsic component of membrane (GO:0031224);;	--	--	uncharacterized protein LOC4332980 [Oryza sativa Japonica Group]
Os02g0696700	2.02e-05	-1.7918	down	--	--	--	lysine-specific demethylase JMJ706-like [Oryza sativa Japonica Group]
Os01g0850100	0.0152176	3.92897	up	Molecular Function: catalytic activity (GO:0003824);; Biological Process: membrane lipid metabolic process (GO:0006643);; Biological Process: response to stress (GO:0006950);; Cellular Component: intrinsic component of membrane (GO:0031224);; Cellular Component: intracellular membrane-bounded organelle (GO:0043231);;	--	--	phosphatidylinositol:ceramide inositolphosphotransferase [Oryza sativa Japonica Group]
Os01g0103100	0.0154048	1.26403	up	Biological Process: steroid metabolic process (GO:0008202);; Biological Process: peptide transport (GO:0015833);; Molecular Function: intramolecular oxidoreductase activity, transposing C=C bonds (GO:0016863);; Cellular Component: intrinsic component of membrane (GO:0031224);;	--	--	protein NRT1/ PTR FAMILY 6.1 [Oryza sativa Japonica Group]
Os08g0401100	0.0203919	-1.26244	down	--	--	--	protein ACCELERATED CELL DEATH 6 [Oryza sativa Japonica Group]
Os03g0719400	0.00343145	4.63259	up	--	K01054|0|osa:4333927|monoglyceride lipase	Glycerolipid metabolism (ko00561)	uncharacterized protein LOC4333927 [Oryza sativa Japonica Group]
Os05g0580000	0.0011792	3.40058	up	Biological Process: glycogen metabolic process (GO:0005977);; Biological Process: starch metabolic process (GO:0005982);; Cellular Component: plastid (GO:0009536);; Molecular Function: purine ribonucleoside binding (GO:0032550);; Molecular Function: adenylyltransferase activity (GO:0070566);;	K00975|0|osa:4339718|glucose-1-phosphate adenylyltransferase large subunit, chloroplastic/amyloplastic	Starch and sucrose metabolism (ko00500);; Amino sugar and nucleotide sugar metabolism (ko00520)	glucose-1-phosphate adenylyltransferase large subunit 3, chloroplastic/amyloplastic-like [Oryza sativa Japonica Group]
Os01g0281000	0.000390987	-1.16866	down	Molecular Function: protein binding (GO:0005515);; Cellular Component: intrinsic component of membrane (GO:0031224);; Molecular Function: purine ribonucleoside binding (GO:0032550);;	--	--	F-box protein At2g32560 [Oryza sativa Japonica Group]
Os01g0391100	0.00618939	2.39584	up	--	K06185|1.03426e-07|ini:109183306|ABC transporter F family member 1-like	--	Os01g0391100, partial [Oryza sativa Japonica Group]
Os03g0712600	0.000802962	2.3338	up	--	--	--	Os03g0712600, partial [Oryza sativa Japonica Group]
Os08g0205800	4.61e-06	6.20658	up	--	--	--	Os08g0205800, partial [Oryza sativa Japonica Group]
Os02g0796400	0.0365329	1.04762	up	Cellular Component: intracellular membrane-bounded organelle (GO:0043231);;	--	--	pentatricopeptide repeat-containing protein At5g27460 [Oryza sativa Japonica Group]
Os07g0245200	0.0408133	1.15317	up	--	--	--	probable polygalacturonase isoform X2 [Oryza sativa Japonica Group]
Os07g0510500	8.86e-05	-2.74096	down	--	--	--	anthocyanidin 3-O-glucosyltransferase 2 [Oryza sativa Japonica Group]
Os01g0678500	0.00115989	1.40824	up	--	K16900|0|osa:4325272|two pore calcium channel protein 1	--	two pore calcium channel protein 1 [Oryza sativa Japonica Group]
Os10g0516300	0.0284681	1.45698	up	Biological Process: leucine metabolic process (GO:0006551);; Molecular Function: oxidoreductase activity, acting on the CH-NH group of donors, quinone or similar compound as acceptor (GO:0016649);; Cellular Component: organelle inner membrane (GO:0019866);; Molecular Function: cation binding (GO:0043169);; Cellular Component: intracellular membrane-bounded organelle (GO:0043231);; Molecular Funct…	K00311|0|osa:4349116|electron transfer flavoprotein-ubiquinone oxidoreductase, mitochondrial	--	Os10g0516300, partial [Oryza sativa Japonica Group]
Os01g0169800	0.0349297	-1.45793	down	--	K16903|0|osa:4325198|L-tryptophan--pyruvate aminotransferase 1	Tryptophan metabolism (ko00380)	tryptophan aminotransferase-related protein 2 [Oryza sativa Japonica Group]
Os03g0374400	0.0211038	2.6857	up	Cellular Component: intrinsic component of membrane (GO:0031224);;	--	--	uncharacterized protein LOC4332948 isoform X1 [Oryza sativa Japonica Group]
Os12g0631600	0.020224	2.83145	up	--	--	--	uncharacterized protein LOC4352864 [Oryza sativa Japonica Group]
Os09g0467200	0.00189919	-1.31124	down	--	K00799|5.02282e-161|osa:4347319|glutathione transferase GST 23	Glutathione metabolism (ko00480)	glutathione transferase GST 23 [Oryza sativa Japonica Group]
Os04g0585900	1.03e-05	-2.60221	down	--	--	--	uncharacterized protein LOC4336794 [Oryza sativa Japonica Group]
Os08g0486200	0.00510403	1.38051	up	Molecular Function: nucleic acid binding (GO:0003676);; Molecular Function: small molecule binding (GO:0036094);;	K12891|1.37718e-103|osa:4345884|serine/arginine-rich splicing factor SC35	Spliceosome (ko03040)	serine/arginine-rich splicing factor SC35 [Oryza sativa Japonica Group]
Os09g0499000	0.0146099	1.98235	up	--	--	--	uncharacterized protein LOC4347474 [Oryza sativa Japonica Group]
Os12g0552400	0.0153893	3.71469	up	Biological Process: response to stimulus (GO:0050896);;	--	--	hypothetical protein OsI_38670 [Oryza sativa Indica Group]
Os03g0643300	0.036894	1.57926	up	--	K00819|0|osa:4333554|ornithine aminotransferase, mitochondrial	Arginine and proline metabolism (ko00330)	hypothetical protein OsJ_11874 [Oryza sativa Japonica Group]
Os03g0817800	5.93e-08	2.82426	up	--	--	--	unknown protein [Oryza sativa Japonica Group]
Os11g0296500	0.0229973	1.57717	up	--	--	--	DNA-binding protein HEXBP [Oryza sativa Japonica Group]
Os05g0475400	0.000370292	3.7643	up	--	K00827|0|osa:4339095|alanine--glyoxylate aminotransferase 2 homolog 2, mitochondrial	Alanine, aspartate and glutamate metabolism (ko00250);; Glycine, serine and threonine metabolism (ko00260);; Cysteine and methionine metabolism (ko00270);; Valine, leucine and isoleucine degradation (ko00280)	alanine--glyoxylate aminotransferase 2 homolog 2, mitochondrial [Oryza sativa Japonica Group]
xxx_newGene_4547	0.00183862	-1.71453	down	Molecular Function: catalytic activity (GO:0003824);;	--	--	hypothetical protein Ahy_B06g082164 [Arachis hypogaea]
Os02g0162500	0.00123814	1.38711	up	--	K02955|5.9056e-80|zma:103629631|LOW QUALITY PROTEIN: 40S ribosomal protein S14-like	Ribosome (ko03010)	LOW QUALITY PROTEIN: 40S ribosomal protein S14-like [Zea mays]
Os12g0194900	0.0492049	-2.24375	down	--	--	--	amino acid permease 6 [Oryza sativa Japonica Group]
Os09g0438100	0.00577305	-1.84723	down	Cellular Component: intrinsic component of membrane (GO:0031224);;	--	--	uncharacterized protein LOC4347159 [Oryza sativa Japonica Group]
Os03g0375200	0.000367711	-1.95966	down	--	--	--	uncharacterized protein LOC9270360 isoform X1 [Oryza sativa Japonica Group]
Os02g0770800	1.5e-11	-5.26336	down	Molecular Function: nitrate reductase activity (GO:0008940);; Biological Process: nitrate metabolic process (GO:0042126);; Biological Process: cellular nitrogen compound biosynthetic process (GO:0044271);; Molecular Function: tetrapyrrole binding (GO:0046906);; Molecular Function: transition metal ion binding (GO:0046914);; Molecular Function: coenzyme binding (GO:0050662);;	K10534|0|osa:4330867|nitrate reductase [NAD(P)H]	Nitrogen metabolism (ko00910)	nitrate reductase [NAD(P)H] [Oryza sativa Japonica Group]
Os04g0491500	0.0150149	3.30784	up	Cellular Component: intrinsic component of membrane (GO:0031224);; Biological Process: establishment of localization (GO:0051234);;	--	--	OSIGBa0130B08.10 [Oryza sativa]
Os05g0362300	0.0313383	2.40111	up	--	--	--	uncharacterized protein LOC4338542 [Oryza sativa Japonica Group]
Os11g0684000	0.0250703	3.42725	up	Molecular Function: nucleic acid binding (GO:0003676);;	K09422|0|osa:4351131|transcription factor MYB108	--	transcription factor JAMYB [Oryza sativa Japonica Group]
Os05g0595100	0.0312417	2.8035	up	Molecular Function: racemase and epimerase activity, acting on carbohydrates and derivatives (GO:0016857);; Biological Process: hexose metabolic process (GO:0019318);;	K01784|0|osa:4339812|UDP-glucose 4-epimerase 1	Galactose metabolism (ko00052);; Amino sugar and nucleotide sugar metabolism (ko00520)	UDP-glucose 4-epimerase 1 [Oryza sativa Japonica Group]
Os07g0662900	0.000260514	-1.49512	down	Biological Process: maltose metabolic process (GO:0000023);; Molecular Function: glycogen debranching enzyme activity (GO:0004133);; Cellular Component: cytoplasm (GO:0005737);; Biological Process: cellular glucan metabolic process (GO:0006073);; Molecular Function: transferase activity (GO:0016740);; Molecular Function: polysaccharide binding (GO:0030247);;	K00705|0|osa:4344192|4-alpha-glucanotransferase DPE2	Starch and sucrose metabolism (ko00500)	hypothetical protein OsJ_25466 [Oryza sativa Japonica Group]
Os06g0597400	0.0350182	-1.23685	down	Biological Process: translation (GO:0006412);; Molecular Function: translation factor activity, RNA binding (GO:0008135);; Biological Process: gene silencing (GO:0016458);; Cellular Component: intracellular part (GO:0044424);; Biological Process: phyllome development (GO:0048827);;	K11593|0|osa:9269490|protein argonaute PNH1	--	protein argonaute PNH1 isoform X1 [Oryza sativa Japonica Group]
Os08g0509200	0.00344725	-2.13963	down	--	K01188|0|osa:4345995|beta-glucosidase 27	Cyanoamino acid metabolism (ko00460);; Starch and sucrose metabolism (ko00500);; Phenylpropanoid biosynthesis (ko00940)	beta-glucosidase 27 [Oryza sativa Japonica Group]
Os11g0602300	0.020144	-1.12878	down	--	--	--	hypothetical protein EE612_056541 [Oryza sativa]
Os01g0305900	0.0154135	-1.63779	down	Molecular Function: nucleic acid binding (GO:0003676);;	K09422|4.38473e-149|osa:4323911|myb-related protein P	--	myb-related protein P [Oryza sativa Japonica Group]
Os02g0204400	0.0120054	-1.17467	down	Molecular Function: nucleic acid binding (GO:0003676);; Molecular Function: DNA photolyase activity (GO:0003913);; Biological Process: DNA metabolic process (GO:0006259);; Biological Process: response to light stimulus (GO:0009416);; Biological Process: cellular response to stress (GO:0033554);; Molecular Function: small molecule binding (GO:0036094);;	K02295|0|osa:4328669|(6-4)DNA photolyase	--	hypothetical protein OsJ_05816 [Oryza sativa Japonica Group]
Os01g0179300	0.0462248	1.86633	up	--	--	--	uncharacterized protein DDB_G0286299 [Oryza sativa Japonica Group]
Os10g0210500	0.0359069	-1.69356	down	--	--	--	WAT1-related protein At4g08290 isoform X1 [Oryza sativa Japonica Group]
Os06g0567200	0.00281605	-2.32213	down	--	K00423|0|osa:4341335|L-ascorbate oxidase	Ascorbate and aldarate metabolism (ko00053)	L-ascorbate oxidase [Oryza sativa Japonica Group]
Os03g0738000	0.000667337	1.19647	up	Biological Process: nuclear-transcribed mRNA catabolic process (GO:0000956);; Molecular Function: protein kinase activity (GO:0004672);; Biological Process: cellular protein modification process (GO:0006464);; Biological Process: phosphate-containing compound metabolic process (GO:0006796);; Cellular Component: intracellular membrane-bounded organelle (GO:0043231);;	K23314|0|osa:4334044|telomerase Cajal body protein 1	--	telomerase Cajal body protein 1 [Oryza sativa Japonica Group]
Os10g0100700	0.00231193	-2.18825	down	Biological Process: coenzyme biosynthetic process (GO:0009108);; Molecular Function: amine-lyase activity (GO:0016843);; Biological Process: water-soluble vitamin biosynthetic process (GO:0042364);;	K06215|0|osa:4347937|probable pyridoxal 5'-phosphate synthase subunit PDX1.2	Vitamin B6 metabolism (ko00750);; Biosynthesis of cofactors (ko01240)	probable pyridoxal 5&apos;-phosphate synthase subunit PDX1.2 [Oryza sativa Japonica Group]
Os09g0460100	0.00390039	1.64932	up	--	--	--	uncharacterized protein LOC4347282 [Oryza sativa Japonica Group]
Os06g0295900	0.0377103	2.96543	up	Cellular Component: intrinsic component of membrane (GO:0031224);;	--	--	Os06g0295900, partial [Oryza sativa Japonica Group]
Os05g0220600	0.0010016	1.44047	up	--	--	--	rhomboid-like protein 11, chloroplastic [Oryza sativa Japonica Group]
Os03g0773600	0.0329527	2.40789	up	--	K10401|0|osa:4334272|kinesin-like protein KIF19 isoform X1	--	kinesin-like protein KIN-8B isoform X1 [Oryza sativa Japonica Group]
Os12g0109900	0.0421706	1.45182	up	Biological Process: intracellular signal transduction (GO:0035556);; Cellular Component: TOR complex (GO:0038201);;	--	--	double-stranded RNA-binding protein 8 isoform X1 [Oryza sativa Japonica Group]
Os02g0254550	0.0496764	-1.19602	down	--	--	--	zinc finger BED domain-containing protein RICESLEEPER 4-like [Oryza sativa Japonica Group]
Os01g0284700	0.0123845	1.33602	up	Molecular Function: cis-trans isomerase activity (GO:0016859);; Biological Process: peptidyl-proline modification (GO:0018208);; Cellular Component: intracellular membrane-bounded organelle (GO:0043231);;	--	--	Os01g0284700 [Oryza sativa Japonica Group]
Os02g0625300	0.00839366	3.81197	up	--	--	--	phosphoenolpyruvate carboxylase kinase 2 [Oryza sativa Japonica Group]
Os05g0525900	6.92e-05	7.13887	up	Biological Process: developmental process involved in reproduction (GO:0003006);; Molecular Function: nucleic acid binding (GO:0003676);; Molecular Function: cation binding (GO:0043169);;	--	--	zinc finger CCCH domain-containing protein 37 [Oryza sativa Japonica Group]
Os01g0945001	0.00357836	3.93927	up	Molecular Function: DNA binding (GO:0003677);; Biological Process: DNA metabolic process (GO:0006259);; Biological Process: response to stress (GO:0006950);; Biological Process: mitochondrion organization (GO:0007005);; Molecular Function: purine ribonucleoside binding (GO:0032550);; Molecular Function: ATPase activity, coupled (GO:0042623);; Cellular Component: intracellular membrane-bounded org…	--	--	DNA repair protein recA homolog 2, mitochondrial [Oryza sativa Japonica Group]
Os12g0582800	0.0101243	2.0777	up	Cellular Component: intrinsic component of membrane (GO:0031224);;	K21989|0|osa:4352647|CSC1-like protein HYP1	--	CSC1-like protein HYP1 [Oryza sativa Japonica Group]
xxx_newGene_1669	0.0101209	4.41635	up	Molecular Function: hydrolase activity (GO:0016787);; Biological Process: protein metabolic process (GO:0019538);;	--	--	hypothetical protein LOC_Os12g37520 [Oryza sativa Japonica Group]
Os01g0558100	0.0218347	3.83661	up	--	K00799|1.78233e-125|osa:4324574|probable glutathione S-transferase GSTU6	Glutathione metabolism (ko00480)	probable glutathione S-transferase GSTU6 [Oryza sativa Japonica Group]
Os03g0690500	0.0373065	1.39255	up	Molecular Function: catalytic activity (GO:0003824);; Molecular Function: cation binding (GO:0043169);; Biological Process: single-organism metabolic process (GO:0044710);;	--	--	Os03g0690500, partial [Oryza sativa Japonica Group]
Os04g0677400	0.0198801	4.18743	up	Cellular Component: intrinsic component of membrane (GO:0031224);;	--	--	uncharacterized protein LOC4337405 isoform X1 [Oryza sativa Japonica Group]
Os06g0698300	1.7e-07	6.54818	up	Molecular Function: phosphoprotein phosphatase activity (GO:0004721);; Biological Process: cellular protein modification process (GO:0006464);; Molecular Function: cation binding (GO:0043169);;	--	--	probable protein phosphatase 2C 59 isoform X2 [Oryza sativa Japonica Group]
Os07g0258400	0.0408161	3.00405	up	Biological Process: iron ion transport (GO:0006826);; Cellular Component: intrinsic component of membrane (GO:0031224);; Molecular Function: transition metal ion transmembrane transporter activity (GO:0046915);; Biological Process: transition metal ion homeostasis (GO:0055076);;	--	--	metal transporter Nramp1 isoform X4 [Oryza sativa Japonica Group]
Os10g0565100	0.0200013	-1.70048	down	--	--	--	Os10g0565100 [Oryza sativa Japonica Group]
Os07g0503900	2.5e-07	-2.02295	down	--	--	--	anthocyanidin 3-O-glucosyltransferase 2 [Oryza sativa Japonica Group]
Os03g0120400	0.0120192	3.77651	up	--	--	--	heavy metal-associated isoprenylated plant protein 30 [Oryza sativa Japonica Group]
Os03g0610400	0.00206015	4.69445	up	--	--	--	zinc finger protein 1 [Oryza sativa Japonica Group]
Os03g0659400	0.0477655	2.48989	up	Molecular Function: nucleic acid binding (GO:0003676);; Cellular Component: intracellular membrane-bounded organelle (GO:0043231);; Molecular Function: transition metal ion binding (GO:0046914);;	K10624|0|osa:4333626|uncharacterized RING finger protein P8B7.15c	--	E3 ubiquitin ligase PARAQUAT TOLERANCE 3 [Oryza sativa Japonica Group]
Os12g0147200	4.87e-14	10.0049	up	Biological Process: response to stress (GO:0006950);; Biological Process: cellular respiration (GO:0045333);;	--	--	uncharacterized protein LOC4351498 [Oryza sativa Japonica Group]
Os02g0728100	0.0386537	-1.14647	down	Biological Process: protein processing (GO:0016485);; Molecular Function: hydrolase activity (GO:0016787);; Cellular Component: intrinsic component of membrane (GO:0031224);; Cellular Component: intracellular membrane-bounded organelle (GO:0043231);;	K04773|0|osa:4330599|serine protease SPPA, chloroplastic	--	serine protease SPPA, chloroplastic [Oryza sativa Japonica Group]
Os05g0116000	0.00581559	2.03608	up	--	--	--	12S seed storage protein CRB [Oryza sativa Japonica Group]
Os01g0507000	1.5e-08	-1.78962	down	Cellular Component: intrinsic component of membrane (GO:0031224);; Cellular Component: intracellular membrane-bounded organelle (GO:0043231);;	--	--	unknown [Oryza sativa Indica Group]
Os01g0784700	0.0175446	-1.29227	down	--	--	--	Os01g0784700 [Oryza sativa Japonica Group]
Os03g0418700	0.0490202	1.91866	up	Biological Process: monopolar cell growth (GO:0042814);;	--	--	protein LONGIFOLIA 2 isoform X2 [Oryza sativa Japonica Group]
Os02g0790500	0.00059916	3.23423	up	Biological Process: trehalose metabolic process (GO:0005991);; Biological Process: phosphate-containing compound metabolic process (GO:0006796);; Molecular Function: carbohydrate phosphatase activity (GO:0019203);; Cellular Component: intracellular membrane-bounded organelle (GO:0043231);;	K16055|0|osa:4330971|probable alpha,alpha-trehalose-phosphate synthase [UDP-forming] 9	Starch and sucrose metabolism (ko00500)	putative alpha,alpha-trehalose-phosphate synthase [Oryza sativa Japonica Group]
Os10g0456100	0.01455	1.38459	up	--	K00059|5.56188e-151|osa:4348791|short-chain type dehydrogenase/reductase	Fatty acid biosynthesis (ko00061);; Biotin metabolism (ko00780);; Fatty acid metabolism (ko01212);; Biosynthesis of cofactors (ko01240)	NAD dependent epimerase/dehydratase family protein, expressed [Oryza sativa Japonica Group]
Os02g0483800	0.000199859	-1.87343	down	Molecular Function: transferase activity, transferring acyl groups (GO:0016746);; Cellular Component: intracellular membrane-bounded organelle (GO:0043231);;	--	--	putative anthocyanidin 3-O-glucoside-3&apos;&apos;,6&apos;&apos;-O-dimalonyltransferase [Oryza sativa Japonica Group]
Os09g0381100	0.00359553	1.6535	up	--	--	--	nucleobase-ascorbate transporter 6 [Oryza sativa Japonica Group]
Os09g0460500	0.0199649	-1.65554	down	Molecular Function: catalytic activity (GO:0003824);;	--	--	Os09g0460500, partial [Oryza sativa Japonica Group]
Os09g0293500	0.025139	1.34488	up	Molecular Function: protein kinase activity (GO:0004672);; Biological Process: cellular protein modification process (GO:0006464);; Biological Process: phosphate-containing compound metabolic process (GO:0006796);; Cellular Component: intrinsic component of membrane (GO:0031224);; Molecular Function: purine ribonucleoside binding (GO:0032550);;	--	--	brassinosteroid LRR receptor kinase BRL1 [Oryza sativa Japonica Group]
Os03g0709300	0.0120054	3.23068	up	--	--	--	chemocyanin [Oryza sativa Japonica Group]
Os04g0632901	0.00123152	-2.13568	down	--	--	--	Os04g0632901 [Oryza sativa Japonica Group]
Os03g0340500	4.17e-05	5.07573	up	--	K00695|0|osa:4332788|sucrose synthase 4	Starch and sucrose metabolism (ko00500)	sucrose synthase 4 [Oryza sativa Japonica Group]
xxx_newGene_4604	1.06e-05	-3.47842	down	--	--	--	uncharacterized protein LOC101780033 [Setaria italica]
Os04g0635500	0.0199305	2.31778	up	--	--	--	uncharacterized protein LOC4337133 [Oryza sativa Japonica Group]
Os05g0568800	0.00492074	-2.16675	down	--	--	--	bradykinin-potentiating and C-type natriuretic peptides [Oryza sativa Japonica Group]
Os06g0114000	0.00121502	1.43106	up	--	K04077|0|osa:4339910|ruBisCO large subunit-binding protein subunit beta, chloroplastic	RNA degradation (ko03018)	ruBisCO large subunit-binding protein subunit beta, chloroplastic [Oryza sativa Japonica Group]
xxx_newGene_14118	2.3e-06	3.09114	up	Molecular Function: nucleic acid binding (GO:0003676);; Biological Process: DNA metabolic process (GO:0006259);; Biological Process: protein metabolic process (GO:0019538);; Cellular Component: intracellular membrane-bounded organelle (GO:0043231);; Biological Process: single-organism cellular process (GO:0044763);; Molecular Function: metal ion binding (GO:0046872);;	--	--	putative polyprotein [Oryza sativa Japonica Group]
Os04g0543900	0.0312169	2.96355	up	Molecular Function: oxidoreductase activity, acting on the CH-NH2 group of donors, NAD or NADP as acceptor (GO:0016639);; Biological Process: carboxylic acid metabolic process (GO:0019752);; Molecular Function: purine ribonucleoside binding (GO:0032550);; Cellular Component: vacuolar part (GO:0044437);; Molecular Function: transition metal ion binding (GO:0046914);;	K00261|6.63948e-69|osa:4336554|glutamate dehydrogenase 2	Arginine biosynthesis (ko00220);; Alanine, aspartate and glutamate metabolism (ko00250);; Nitrogen metabolism (ko00910);; Carbon metabolism (ko01200)	putative glutamate dehydrogenase 2, partial [Triticum monococcum subsp. aegilopoides]
Os01g0128200	0.0199724	1.31933	up	Molecular Function: nuclease activity (GO:0004518);; Biological Process: DNA metabolic process (GO:0006259);; Molecular Function: organic cyclic compound binding (GO:0097159);;	--	--	endonuclease 2 [Oryza sativa Japonica Group]
Os01g0901500	0.000253383	-2.62002	down	Biological Process: jasmonic acid metabolic process (GO:0009694);; Molecular Function: C-acyltransferase activity (GO:0016408);; Molecular Function: purine ribonucleoside binding (GO:0032550);; Cellular Component: microbody (GO:0042579);;	--	--	Os01g0901500 [Oryza sativa Japonica Group]
Os08g0506000	0.000588187	1.45634	up	--	--	--	uncharacterized protein LOC4345979 isoform X2 [Oryza sativa Japonica Group]
Os10g0489500	0.037876	-1.51904	down	Biological Process: terpenoid metabolic process (GO:0006721);; Biological Process: response to stress (GO:0006950);; Cellular Component: plastid (GO:0009536);; Molecular Function: carbon-oxygen lyase activity, acting on phosphates (GO:0016838);; Molecular Function: metal ion binding (GO:0046872);;	--	--	S-(+)-linalool synthase, chloroplastic [Oryza sativa Japonica Group]
Os05g0155100	0.000725343	1.85401	up	--	K02883|3.42693e-130|osa:4337849|60S ribosomal protein L18-3	Ribosome (ko03010)	60S ribosomal protein L18-3 [Oryza sativa Japonica Group]
Os02g0489400	0.00120825	1.4546	up	--	K02995|7.37885e-133|osa:4329381|40S ribosomal protein S8	Ribosome (ko03010)	40S ribosomal protein S8 [Oryza sativa Japonica Group]
Os02g0186800	0.0205172	-1.37965	down	--	--	--	hypothetical protein OsI_06149 [Oryza sativa Indica Group]
Os06g0217900	0.021232	-1.16069	down	Cellular Component: intrinsic component of membrane (GO:0031224);; Cellular Component: intracellular membrane-bounded organelle (GO:0043231);; Biological Process: single-organism cellular process (GO:0044763);;	K18810|0|osa:4340499|cyclin-D3-1	--	cyclin-D3-1 [Oryza sativa Japonica Group]
Os03g0129800	0.0185911	-1.80899	down	Molecular Function: nucleic acid binding (GO:0003676);; Biological Process: DNA recombination (GO:0006310);; Molecular Function: transferase activity (GO:0016740);; Cellular Component: intrinsic component of membrane (GO:0031224);; Cellular Component: Golgi apparatus part (GO:0044431);; Biological Process: external encapsulating structure organization (GO:0045229);;	--	--	Os03g0129800, partial [Oryza sativa Japonica Group]
Os08g0364900	0.000128758	-1.87411	down	--	K06911|0|osa:4345385|pirin-like protein isoform X1	--	pirin-like protein isoform X1 [Oryza sativa Japonica Group]
Os03g0167500	0.00111089	2.88832	up	Cellular Component: late endosome (GO:0005770);; Biological Process: protein localization (GO:0008104);; Cellular Component: plant-type vacuole membrane (GO:0009705);; Cellular Component: intrinsic component of membrane (GO:0031224);; Cellular Component: Golgi apparatus part (GO:0044431);; Molecular Function: transition metal ion binding (GO:0046914);; Biological Process: establishment of localiz…	K15692|0|osa:4331745|receptor homology region, transmembrane domain- and RING domain-containing protein 1 isoform X1	--	receptor homology region, transmembrane domain- and RING domain-containing protein 1 isoform X1 [Oryza sativa Japonica Group]
Os01g0571300	2.18e-06	6.90139	up	Molecular Function: nucleic acid binding transcription factor activity (GO:0001071);; Molecular Function: DNA binding (GO:0003677);; Biological Process: transcription, DNA-templated (GO:0006351);; Cellular Component: intracellular membrane-bounded organelle (GO:0043231);;	K09419|0|osa:4326351|heat stress transcription factor A-6a	--	heat stress transcription factor A-6a [Oryza sativa Japonica Group]
xxx_newGene_4331	0.00967825	1.77101	up	--	--	--	transposon protein, putative, CACTA, En/Spm sub-class [Oryza sativa Japonica Group]
Os05g0109600	0.0387126	1.22242	up	Molecular Function: nucleic acid binding (GO:0003676);;	--	--	pumilio homolog 1 [Oryza sativa Japonica Group]
Os07g0684000	0.00295064	1.20284	up	--	--	--	ricin B-like lectin R40G3 [Oryza sativa Japonica Group]
Os06g0257450	0.000194478	-1.10771	down	--	K10808|0|osa:9266846|ribonucleoside-diphosphate reductase small chain	Purine metabolism (ko00230);; Pyrimidine metabolism (ko00240);; Glutathione metabolism (ko00480)	ribonucleoside-diphosphate reductase small chain [Oryza sativa Japonica Group]
Os06g0179700	0.0073017	-1.21257	down	Molecular Function: phosphoprotein phosphatase activity (GO:0004721);; Biological Process: cellular protein modification process (GO:0006464);; Molecular Function: cation binding (GO:0043169);;	K14803|0|osa:4340303|probable protein phosphatase 2C 54 isoform X2	--	probable protein phosphatase 2C 54 isoform X2 [Oryza sativa Japonica Group]
Os12g0610600	0.00442163	1.71947	up	Molecular Function: nucleic acid binding (GO:0003676);; Biological Process: transcription, DNA-templated (GO:0006351);; Cellular Component: intracellular membrane-bounded organelle (GO:0043231);;	--	--	NAC domain-containing protein 21/22 isoform X2 [Oryza sativa Japonica Group]
Os03g0295300	0.0283172	-1.03815	down	Cellular Component: intracellular membrane-bounded organelle (GO:0043231);;	--	--	uncharacterized protein LOC4332530 [Oryza sativa Japonica Group]
Os02g0216000	0.00156639	5.09546	up	Molecular Function: protein kinase activity (GO:0004672);; Biological Process: cellular protein modification process (GO:0006464);; Biological Process: phosphate-containing compound metabolic process (GO:0006796);; Cellular Component: intrinsic component of membrane (GO:0031224);; Molecular Function: purine ribonucleoside binding (GO:0032550);;	--	--	receptor kinase-like protein Xa21 [Oryza sativa Japonica Group]
Os04g0635100	8.14e-05	3.51492	up	--	--	--	uncharacterized protein LOC4337130 [Oryza sativa Japonica Group]
Os05g0548900	7.16e-08	-3.31059	down	--	K05929|0|osa:4339516|phosphomethylethanolamine N-methyltransferase	Glycerophospholipid metabolism (ko00564)	phosphomethylethanolamine N-methyltransferase [Oryza sativa Japonica Group]
Os03g0241200	0.00879073	1.00613	up	Molecular Function: nucleic acid binding (GO:0003676);; Cellular Component: ribosome (GO:0005840);; Biological Process: rRNA processing (GO:0006364);; Cellular Component: nuclear lumen (GO:0031981);;	K12845|1.51608e-74|osa:4332209|NHP2-like protein 1	Ribosome biogenesis in eukaryotes (ko03008);; Spliceosome (ko03040)	PREDICTED: NHP2-like protein 1 [Oryza brachyantha]
Os02g0138900	3.96e-06	4.6906	up	Biological Process: calcium ion transport (GO:0006816);; Molecular Function: calcium:cation antiporter activity (GO:0015368);; Cellular Component: intrinsic component of membrane (GO:0031224);; Cellular Component: vacuolar part (GO:0044437);;	K07300|2.91531e-158|osa:9271552|putative vacuolar cation/proton exchanger 4 isoform X1	--	putative vacuolar cation/proton exchanger 4 isoform X4 [Oryza sativa Japonica Group]
Os08g0531100	0.00211569	2.78791	up	Biological Process: microtubule-based process (GO:0007017);; Molecular Function: tubulin binding (GO:0015631);; Biological Process: cell cycle process (GO:0022402);;	K16732|0|osa:4346130|65-kDa microtubule-associated protein 8 isoform X1	--	putative microtubule-associated protein [Oryza sativa Japonica Group]
Os03g0310800	0.00260239	-2.02099	down	Cellular Component: cytoplasm (GO:0005737);; Molecular Function: metal ion binding (GO:0046872);;	--	--	calcium-binding protein CP1 [Oryza sativa Japonica Group]
Os01g0327100	0.00806851	3.67157	up	--	K00430|0|osa:4326969|peroxidase 1	Phenylpropanoid biosynthesis (ko00940)	peroxidase 1 isoform X2 [Oryza sativa Japonica Group]
Os01g0863166	0.0120862	1.74666	up	Cellular Component: intrinsic component of membrane (GO:0031224);;	--	--	hypothetical protein [Oryza sativa Japonica Group]
Os01g0200350	0.000462142	2.36997	up	Molecular Function: nucleic acid binding (GO:0003676);; Biological Process: transcription, DNA-templated (GO:0006351);; Cellular Component: intracellular membrane-bounded organelle (GO:0043231);;	K09338|0|osa:4327348|homeobox-leucine zipper protein HOX29	--	homeobox-leucine zipper protein HOX29 [Oryza sativa Japonica Group]
Os12g0594000	0.0378804	2.19478	up	Cellular Component: intrinsic component of membrane (GO:0031224);;	--	--	Os12g0594000 [Oryza sativa Japonica Group]
Os07g0586100	0.0212106	2.32644	up	--	--	--	hypothetical protein OsI_26660 [Oryza sativa Indica Group]
Os09g0412700	0.000125666	-2.33551	down	--	--	--	uncharacterized protein LOC4347042 [Oryza sativa Japonica Group]
Os02g0678601	0.0047762	-1.64674	down	--	--	--	Os02g0678601 [Oryza sativa Japonica Group]
Os01g0105900	9.95e-11	1.74957	up	Biological Process: phosphate-containing compound metabolic process (GO:0006796);; Molecular Function: transferase activity, transferring phosphorus-containing groups (GO:0016772);;	--	--	uncharacterized protein LOC4326303 [Oryza sativa Japonica Group]
Os03g0298300	0.000935655	1.24285	up	Cellular Component: intrinsic component of membrane (GO:0031224);;	--	--	hypothetical protein EE612_016868 [Oryza sativa]
Os02g0700700	0.0379522	-1.08293	down	--	--	--	protein Brevis radix-like 2 isoform X1 [Oryza sativa Japonica Group]
Os11g0168200	0.00061507	1.27151	up	--	K02925|0|obr:102704460|60S ribosomal protein L3-like	Ribosome (ko03010)	PREDICTED: 60S ribosomal protein L3-like [Oryza brachyantha]
Os10g0565150	3.35e-05	6.82746	up	--	K01177|0|osa:4349417|beta-amylase 3, chloroplastic	Starch and sucrose metabolism (ko00500)	beta-amylase 3, chloroplastic [Oryza sativa Japonica Group]
Os04g0475200	0.0479279	-1.914	down	--	--	--	hypothetical protein OsI_16293 [Oryza sativa Indica Group]
Os01g0625300	0.0127621	-1.90155	down	--	K09419|2.73819e-178|osa:4326685|heat stress transcription factor C-1a	--	heat stress transcription factor C-1a [Oryza sativa Japonica Group]
Os06g0154200	0.00011578	2.31957	up	Biological Process: response to radiation (GO:0009314);; Biological Process: response to water deprivation (GO:0009414);; Biological Process: seed germination (GO:0009845);; Biological Process: meristem structural organization (GO:0009933);; Cellular Component: intracellular membrane-bounded organelle (GO:0043231);; Biological Process: auxin transport (GO:0060918);;	--	--	F-box/LRR-repeat MAX2 homolog [Oryza sativa Japonica Group]
Os06g0228200	7.5e-05	-2.21446	down	--	K09874|1.37149e-103|osa:4340558|aquaporin NIP2-2	--	Os06g0228200, partial [Oryza sativa Japonica Group]
Os03g0281900	0.0329378	1.63036	up	--	--	--	RecName: Full=ABC transporter G family member 5; Short=ABC transporter ABCG.5; Short=OsABCG5; AltName: Full=White-brown complex homolog protein 5; Short=OsWBC5
Os02g0714100	4.37e-07	3.06982	up	--	K22848|0|osa:4330511|diacylglycerol O-acyltransferase 2	Glycerolipid metabolism (ko00561)	diacylglycerol O-acyltransferase 2D [Oryza sativa Japonica Group]
Os05g0169800	0.00601961	-1.8076	down	--	--	--	Os05g0169800 [Oryza sativa Japonica Group]
Os09g0115400	0.0120054	1.92596	up	Molecular Function: nucleic acid binding (GO:0003676);; Molecular Function: small molecule binding (GO:0036094);; Cellular Component: intracellular part (GO:0044424);;	K13126|0|osa:4346409|polyadenylate-binding protein 2	RNA transport (ko03013);; mRNA surveillance pathway (ko03015);; RNA degradation (ko03018)	polyadenylate-binding protein 2 [Oryza sativa Japonica Group]
Os01g0357100	7.89e-06	-1.54347	down	Cellular Component: extracellular region (GO:0005576);; Cellular Component: plastid stroma (GO:0009532);; Molecular Function: oxidoreductase activity, acting on other nitrogenous compounds as donors, iron-sulfur protein as acceptor (GO:0016664);; Biological Process: nitrate metabolic process (GO:0042126);; Molecular Function: cation binding (GO:0043169);; Molecular Function: tetrapyrrole binding …	K00366|0|osa:4326014|ferredoxin--nitrite reductase, chloroplastic	Nitrogen metabolism (ko00910)	ferredoxin--nitrite reductase, chloroplastic isoform X2 [Oryza sativa Japonica Group]
Os12g0115100	0.000173573	2.16547	up	Cellular Component: chloroplast (GO:0009507);; Biological Process: lipid localization (GO:0010876);; Biological Process: carbon fixation (GO:0015977);; Molecular Function: oxidoreductase activity (GO:0016491);; Molecular Function: hydrolase activity (GO:0016787);; Molecular Function: carboxy-lyase activity (GO:0016831);; Biological Process: protein metabolic process (GO:0019538);; Cellular Compon…	--	--	hypothetical protein EE612_057399 [Oryza sativa]
Os02g0160400	8.86e-05	12.8962	up	--	--	--	sugar transport protein MST8-like [Oryza sativa Japonica Group]
Os04g0594400	0.0413139	3.0425	up	--	--	--	binding partner of ACD11 1 isoform X3 [Oryza sativa Japonica Group]
Os03g0769800	0.0109126	1.62312	up	Molecular Function: nucleic acid binding transcription factor activity (GO:0001071);; Molecular Function: nucleic acid binding (GO:0003676);; Biological Process: transcription, DNA-templated (GO:0006351);; Cellular Component: intrinsic component of membrane (GO:0031224);; Cellular Component: intracellular membrane-bounded organelle (GO:0043231);;	--	--	putative homeodomain leucine-zipper protein Hox9 [Oryza sativa Japonica Group]
Os10g0370700	0.000987987	-1.9809	down	--	--	--	protein NRT1/ PTR FAMILY 8.3 isoform X1 [Oryza sativa Japonica Group]
Os08g0540000	0.0447542	1.67807	up	Cellular Component: intrinsic component of membrane (GO:0031224);; Biological Process: establishment of localization (GO:0051234);;	K15287|0|osa:4346184|solute carrier family 35 member F1	--	solute carrier family 35 member F1 [Oryza sativa Japonica Group]
Os07g0656200	0.0386845	1.57233	up	--	K05350|0|osa:4344146|beta-glucosidase 26 isoform X2	Cyanoamino acid metabolism (ko00460);; Starch and sucrose metabolism (ko00500);; Phenylpropanoid biosynthesis (ko00940)	beta-glucosidase 26 [Oryza sativa Japonica Group]
Os03g0795100	0.012555	-1.59686	down	--	--	--	uncharacterized protein LOC4334411 [Oryza sativa Japonica Group]
Os06g0531200	0.00649187	1.38662	up	--	K03152|0|osa:4341205|protein DJ-1 homolog A	--	protein DJ-1 homolog A [Oryza sativa Japonica Group]
Os05g0498300	0.0492123	1.46944	up	Molecular Function: double-stranded DNA binding (GO:0003690);; Cellular Component: nucleus (GO:0005634);; Cellular Component: chromosome (GO:0005694);; Biological Process: mismatch repair (GO:0006298);; Biological Process: synapsis (GO:0007129);; Biological Process: reciprocal meiotic recombination (GO:0007131);; Molecular Function: purine ribonucleoside binding (GO:0032550);;	K08741|0|osa:4339215|DNA mismatch repair protein MSH5 isoform X1	--	hypothetical protein OsJ_19071 [Oryza sativa Japonica Group]
Os01g0207400	0.00748304	-2.19543	down	--	--	--	Os01g0207400, partial [Oryza sativa Japonica Group]
Os02g0707900	0.0110882	3.53378	up	Cellular Component: intrinsic component of membrane (GO:0031224);; Cellular Component: intracellular membrane-bounded organelle (GO:0043231);;	--	--	uncharacterized protein LOC4330473 [Oryza sativa Japonica Group]
Os01g0547600	4.51e-05	-2.95022	down	Cellular Component: plant-type vacuole (GO:0000325);; Molecular Function: inorganic anion transmembrane transporter activity (GO:0015103);; Biological Process: inorganic anion transport (GO:0015698);; Cellular Component: intrinsic component of membrane (GO:0031224);; Biological Process: nitrate metabolic process (GO:0042126);;	K02575|0|osa:107277478|probable high-affinity nitrate transporter 2.4	Nitrogen metabolism (ko00910)	probable high-affinity nitrate transporter 2.4 [Oryza sativa Japonica Group]
Os03g0729300	0.00197949	-1.53372	down	--	--	--	prostamide/prostaglandin F synthase [Oryza sativa Japonica Group]
Os03g0431100	0.00376416	-1.41085	down	Cellular Component: intrinsic component of membrane (GO:0031224);;	--	--	Os03g0431100, partial [Oryza sativa Japonica Group]
Os02g0700300	1.73e-06	-3.13875	down	--	--	--	myb family transcription factor PHL11 [Oryza sativa Japonica Group]
Os04g0623200	9.61e-05	-3.36115	down	--	--	--	uncharacterized protein LOC4337045 [Oryza sativa Japonica Group]
Os05g0195700	0.0310831	1.18843	up	--	--	--	hypothetical protein OsI_18777 [Oryza sativa Indica Group]
Os01g0213800	0.00779363	2.23512	up	Molecular Function: nucleic acid binding (GO:0003676);; Biological Process: transcription, DNA-templated (GO:0006351);; Biological Process: shoot system morphogenesis (GO:0010016);; Biological Process: regulation of development, heterochronic (GO:0040034);; Cellular Component: intracellular membrane-bounded organelle (GO:0043231);; Biological Process: phyllome development (GO:0048827);; Biologica…	--	--	hypothetical protein EE612_001030, partial [Oryza sativa]
Os07g0615200	0.0210729	-1.4219	down	--	K13464|2.1943e-158|osa:4343899|protein TIFY 10b	Plant hormone signal transduction (ko04075)	protein TIFY 10b [Oryza sativa Japonica Group]
Os03g0203800	1.51e-05	1.36481	up	--	K18811|0|osa:4331985|cyclin-D5-3	--	cyclin-D5-3 [Oryza sativa Japonica Group]
Os07g0523100	0.0246117	2.03889	up	--	K02929|3.82545e-62|pda:103703970|60S ribosomal protein L44-like	Ribosome (ko03010)	unnamed protein product [Triticum turgidum subsp. durum]
Os02g0717600	0.0335026	3.03025	up	Cellular Component: intrinsic component of membrane (GO:0031224);;	--	--	uncharacterized protein LOC4330531 [Oryza sativa Japonica Group]
Os07g0603100	0.0110544	2.06159	up	Molecular Function: small molecule binding (GO:0036094);; Cellular Component: cell part (GO:0044464);; Biological Process: establishment of localization (GO:0051234);; Molecular Function: organic cyclic compound binding (GO:0097159);;	--	--	ras GTPase-activating protein-binding protein 2 [Oryza sativa Japonica Group]
Os04g0576800	0.00798191	1.81891	up	--	--	--	Os04g0576800, partial [Oryza sativa Japonica Group]
Os11g0629400	0.0283592	-1.6106	down	Molecular Function: nucleic acid binding transcription factor activity (GO:0001071);; Biological Process: transcription, DNA-templated (GO:0006351);; Cellular Component: microtubule cytoskeleton (GO:0015630);; Cellular Component: intracellular membrane-bounded organelle (GO:0043231);;	K18635|6.0559e-21|osa:4350963|protein SPIRAL1-like 2	--	hypothetical protein OsI_36745 [Oryza sativa Indica Group]
Os07g0565700	0.0369864	-1.0085	down	--	K01054|0|osa:4343627|caffeoylshikimate esterase	Glycerolipid metabolism (ko00561)	caffeoylshikimate esterase [Oryza sativa Japonica Group]
Os11g0565300	0.00254678	-1.51637	down	Molecular Function: pattern binding (GO:0001871);; Molecular Function: protein kinase activity (GO:0004672);; Biological Process: cellular protein modification process (GO:0006464);; Biological Process: phosphate-containing compound metabolic process (GO:0006796);; Cellular Component: intrinsic component of membrane (GO:0031224);; Molecular Function: purine ribonucleoside binding (GO:0032550);; M…	--	--	Os11g0565300 [Oryza sativa Japonica Group]
Os12g0266200	0.000952489	-1.36406	down	--	--	--	wall-associated receptor kinase 3 isoform X2 [Oryza sativa Japonica Group]
Os02g0139000	0.0137856	2.12697	up	Molecular Function: nucleic acid binding (GO:0003676);; Biological Process: transcription, DNA-templated (GO:0006351);; Cellular Component: intracellular membrane-bounded organelle (GO:0043231);;	--	--	protein PHOSPHATE STARVATION RESPONSE 3 [Oryza sativa Japonica Group]
Os01g0126200	5.78e-05	-3.3171	down	--	--	--	multicopper oxidase LPR1 homolog 2 isoform X1 [Oryza sativa Japonica Group]
Os01g0935600	0.0247774	1.08176	up	Cellular Component: plastid (GO:0009536);;	--	--	Os01g0935600 [Oryza sativa Japonica Group]
Os02g0736100	0.00168598	1.83241	up	Biological Process: organelle organization (GO:0006996);; Cellular Component: microtubule cytoskeleton (GO:0015630);; Molecular Function: tubulin binding (GO:0015631);; Cellular Component: intracellular membrane-bounded organelle (GO:0043231);;	--	--	hypothetical protein OsJ_08300 [Oryza sativa Japonica Group]
Os07g0480900	0.00138842	4.57395	up	--	K01373|0|osa:4343231|probable cysteine proteinase A494	Plant-pathogen interaction (ko04626)	probable cysteine protease RD19D [Oryza sativa Japonica Group]
Os04g0610800	0.000114807	1.39261	up	Biological Process: porphyrin-containing compound biosynthetic process (GO:0006779);; Cellular Component: plastid (GO:0009536);; Molecular Function: oxidoreductase activity, acting on the CH-CH group of donors, oxygen as acceptor (GO:0016634);; Biological Process: single-organism metabolic process (GO:0044710);; Molecular Function: protein dimerization activity (GO:0046983);;	K00228|0|osa:4336951|oxygen-dependent coproporphyrinogen-III oxidase, chloroplastic	Porphyrin and chlorophyll metabolism (ko00860);; Biosynthesis of cofactors (ko01240)	oxygen-dependent coproporphyrinogen-III oxidase, chloroplastic [Oryza sativa Japonica Group]
Os11g0490900	0.0168281	3.28612	up	Molecular Function: nucleic acid binding transcription factor activity (GO:0001071);; Molecular Function: DNA binding (GO:0003677);; Biological Process: transcription, DNA-templated (GO:0006351);; Cellular Component: intracellular membrane-bounded organelle (GO:0043231);;	--	--	probable WRKY transcription factor 56 [Oryza sativa Japonica Group]
Os03g0428000	0.0116897	2.10737	up	Cellular Component: intrinsic component of membrane (GO:0031224);; Biological Process: cellular protein metabolic process (GO:0044267);; Molecular Function: transition metal ion binding (GO:0046914);;	K12169|1.78574e-26|zma:100280438|uncharacterized protein LOC100280438	--	Os03g0428000 [Oryza sativa Japonica Group]
Os01g0201200	0.00473079	-1.99163	down	Biological Process: cellular protein modification process (GO:0006464);; Molecular Function: kinase activity (GO:0016301);; Molecular Function: purine ribonucleoside binding (GO:0032550);; Cellular Component: intracellular membrane-bounded organelle (GO:0043231);;	--	--	serine/threonine-protein kinase HT1 [Oryza sativa Japonica Group]
Os05g0435800	0.00428583	-2.0453	down	Molecular Function: endopeptidase activity (GO:0004175);; Biological Process: protein metabolic process (GO:0019538);;	--	--	subtilisin-like protease SBT1.7 [Oryza sativa Japonica Group]
Os10g0535800	0.00646683	3.25119	up	Cellular Component: intrinsic component of membrane (GO:0031224);;	--	--	uncharacterized protein LOC4349235 isoform X1 [Oryza sativa Japonica Group]
Os02g0782550	2.37e-09	3.87524	up	Biological Process: response to stress (GO:0006950);; Cellular Component: intracellular part (GO:0044424);;	K13993|2.19123e-65|osa:4330933|18.6 kDa class III heat shock protein	Protein processing in endoplasmic reticulum (ko04141)	RecName: Full=18.6 kDa class III heat shock protein; AltName: Full=18.6 kDa heat shock protein; Short=OsHsp18.6
Os02g0123100	0.000725343	-1.37545	down	Molecular Function: protein serine/threonine kinase activity (GO:0004674);; Biological Process: cellular protein modification process (GO:0006464);; Biological Process: phosphate-containing compound metabolic process (GO:0006796);; Molecular Function: purine ribonucleoside binding (GO:0032550);; Cellular Component: intracellular membrane-bounded organelle (GO:0043231);;	--	--	cell division control protein 2 [Trifolium pratense]
Os01g0692100	2.91e-06	4.61819	up	--	K00799|6.1787e-161|osa:4325643|probable glutathione S-transferase GSTU6	Glutathione metabolism (ko00480)	probable glutathione S-transferase GSTU6 [Oryza sativa Japonica Group]
Os09g0512950	0.0203207	3.62992	up	--	--	--	unnamed protein product, partial [Oryza sativa Japonica Group]
Os01g0358400	0.00118572	1.29091	up	--	K02987|2.13025e-169|osa:4326022|40S ribosomal protein S4-like	Ribosome (ko03010)	40S ribosomal protein S4-like [Oryza sativa Japonica Group]
Os03g0161500	0.000243196	5.07162	up	Cellular Component: intrinsic component of membrane (GO:0031224);;	--	--	expressed protein [Oryza sativa Japonica Group]
Os03g0266100	0.0479451	-1.02355	down	Molecular Function: transition metal ion binding (GO:0046914);;	--	--	LIM domain-containing protein WLIM2a [Oryza sativa Japonica Group]
Os03g0226400	0.00324935	-2.07893	down	--	--	--	Os03g0226400, partial [Oryza sativa Japonica Group]
Os02g0130100	0.00715629	-1.63886	down	--	K08681|5.62205e-172|osa:4328188|probable pyridoxal 5'-phosphate synthase subunit PDX2	Vitamin B6 metabolism (ko00750);; Biosynthesis of cofactors (ko01240)	probable pyridoxal 5&apos;-phosphate synthase subunit PDX2 [Oryza sativa Japonica Group]
Os11g0229500	0.00919557	-1.89526	down	Biological Process: response to stress (GO:0006950);; Biological Process: programmed cell death (GO:0012501);; Molecular Function: purine ribonucleoside binding (GO:0032550);;	--	--	disease resistance protein RPM1 [Oryza sativa Japonica Group]
Os03g0820500	1.53e-13	6.48275	up	--	K05765|6.10514e-92|osa:4334594|actin-depolymerizing factor 3	--	actin-depolymerizing factor 3 [Oryza sativa Japonica Group]
Os04g0569000	0.00371751	1.89258	up	--	K10755|0|osa:4336704|replication factor C subunit 4	DNA replication (ko03030);; Nucleotide excision repair (ko03420);; Mismatch repair (ko03430)	replication factor C subunit 4 [Oryza sativa Japonica Group]
Os04g0345400	0.00208545	-2.67413	down	--	--	--	Os04g0345400, partial [Oryza sativa Japonica Group]
Os01g0971900	0.00370898	1.01606	up	Molecular Function: nucleic acid binding (GO:0003676);;	--	--	pumilio homolog 1 [Oryza sativa Japonica Group]
Os12g0164600	0.00318548	-1.63352	down	--	--	--	uncharacterized protein LOC4351588 [Oryza sativa Japonica Group]
Os01g0936800	0.0277027	-1.5218	down	--	--	--	vesicle-associated protein 1-2 [Oryza sativa Japonica Group]
Os01g0853700	0.0031958	-1.47675	down	Molecular Function: nucleic acid binding (GO:0003676);; Biological Process: transcription, DNA-templated (GO:0006351);; Cellular Component: intracellular membrane-bounded organelle (GO:0043231);;	--	--	transcription factor DIVARICATA [Oryza sativa Japonica Group]
Os03g0192500	0.0365329	-1.41505	down	Biological Process: cellular protein modification process (GO:0006464);; Molecular Function: phosphatase activity (GO:0016791);; Molecular Function: cation binding (GO:0043169);;	--	--	probable protein phosphatase 2C BIPP2C1 isoform X1 [Oryza sativa Japonica Group]
Os01g0687300	0.00945211	-1.19824	down	--	--	--	uncharacterized protein LOC4324116 [Oryza sativa Japonica Group]
Os02g0595300	0.0123075	2.2522	up	--	--	--	hypothetical protein [Oryza sativa Japonica Group]
Os03g0159900	4.8e-11	-4.42723	down	--	--	--	uncharacterized protein LOC4331694 [Oryza sativa Japonica Group]
Os01g0962100	3.07e-08	6.89787	up	--	--	--	unknown protein [Oryza sativa Japonica Group]
Os04g0281900	0.0259578	1.05301	up	Cellular Component: intrinsic component of membrane (GO:0031224);;	--	--	CASP-like protein 2A1 [Oryza sativa Japonica Group]
Os07g0130400	0.0312593	-1.25269	down	Molecular Function: protein kinase activity (GO:0004672);; Biological Process: cellular protein modification process (GO:0006464);; Biological Process: phosphate-containing compound metabolic process (GO:0006796);; Cellular Component: intrinsic component of membrane (GO:0031224);; Molecular Function: purine ribonucleoside binding (GO:0032550);;	--	--	putative receptor-like protein kinase [Oryza sativa Japonica Group]
xxx_newGene_4489	0.0100553	3.15023	up	Molecular Function: transferase activity, transferring acyl groups (GO:0016746);;	--	--	unknown protein [Oryza sativa Japonica Group]
Os01g0621300	6.36e-05	-1.34216	down	--	--	--	uncharacterized protein LOC4326628 [Oryza sativa Japonica Group]
Os08g0327400	0.00243537	3.07049	up	Molecular Function: fatty acid synthase activity (GO:0004312);; Biological Process: fatty acid metabolic process (GO:0006631);; Cellular Component: plastid (GO:0009536);;	K00208|0|osa:4345286|enoyl-[acyl-carrier-protein] reductase [NADH] 1, chloroplastic	Fatty acid biosynthesis (ko00061);; Biotin metabolism (ko00780);; Fatty acid metabolism (ko01212);; Biosynthesis of cofactors (ko01240)	hypothetical protein OsI_28799 [Oryza sativa Indica Group]
Os04g0571200	0.00294807	2.32169	up	--	K19045|5.00316e-166|osa:4336715|E3 ubiquitin ligase BIG BROTHER-related	--	Os04g0571200, partial [Oryza sativa Japonica Group]
Os01g0784725	0.0144742	-1.0446	down	--	--	--	receptor-like serine/threonine-protein kinase SD1-8 isoform X2 [Oryza sativa Japonica Group]
Os01g0348700	2.05e-05	1.60568	up	--	K02893|3.2747e-64|osa:4326469|60S ribosomal protein L23A	Ribosome (ko03010)	60S ribosomal protein L23A [Oryza sativa Japonica Group]
Os04g0638100	0.00945211	-1.61598	down	--	--	--	phenolic glucoside malonyltransferase 1 [Oryza sativa Japonica Group]
Os08g0536300	0.0458893	-1.12949	down	Cellular Component: cell part (GO:0044464);; Molecular Function: transition metal ion binding (GO:0046914);;	--	--	zinc finger protein CONSTANS-LIKE 14 [Oryza sativa Japonica Group]
Os07g0525900	9.66e-06	-2.40265	down	Biological Process: metabolic process (GO:0008152);; Molecular Function: transferase activity, transferring acyl groups (GO:0016746);;	--	--	bisdemethoxycurcumin synthase-like [Oryza sativa Japonica Group]
Os03g0252100	0.0063906	-2.12593	down	Molecular Function: catalytic activity (GO:0003824);;	--	--	Os03g0252100, partial [Oryza sativa Japonica Group]
Os02g0815600	0.00683306	1.87459	up	--	K07561|0|osa:4331131|diphthamide biosynthesis protein 1	--	2-(3-amino-3-carboxypropyl)histidine synthase subunit 1 [Oryza sativa Japonica Group]
Os05g0201700	4.06e-16	-5.84526	down	--	--	--	lachrymatory-factor synthase [Oryza sativa Japonica Group]
Os09g0493500	0.023876	1.51025	up	Biological Process: modification-dependent protein catabolic process (GO:0019941);; Cellular Component: intracellular membrane-bounded organelle (GO:0043231);; Molecular Function: cofactor binding (GO:0048037);;	--	--	tetraketide alpha-pyrone reductase 1 [Oryza sativa Japonica Group]
Os03g0602600	0.00445354	1.3504	up	--	--	--	fructokinase-like 2, chloroplastic [Oryza sativa Japonica Group]
Os01g0827300	0.0306326	1.62094	up	--	K05909|0|osa:4327522|laccase-3	--	laccase-3 [Oryza sativa Japonica Group]
Os03g0835400	0.0177426	2.30535	up	--	K03522|0|osa:4334698|electron transfer flavoprotein subunit alpha, mitochondrial	--	electron transfer flavoprotein subunit alpha, mitochondrial [Oryza sativa Japonica Group]
Os01g0899200	6.45e-07	-2.29215	down	--	--	--	Os01g0899200, partial [Oryza sativa Japonica Group]
Os04g0679500	0.000621082	2.57873	up	--	--	--	stem-specific protein TSJT1 [Oryza sativa Japonica Group]
Os03g0432900	0.0147068	1.99064	up	Biological Process: transport (GO:0006810);; Cellular Component: intrinsic component of membrane (GO:0031224);; Cellular Component: intracellular membrane-bounded organelle (GO:0043231);; Molecular Function: transition metal ion binding (GO:0046914);;	--	--	Os03g0432900, partial [Oryza sativa Japonica Group]
Os05g0194500	0.044123	3.27469	up	Molecular Function: nucleic acid binding (GO:0003676);; Biological Process: transcription, DNA-templated (GO:0006351);; Cellular Component: intracellular membrane-bounded organelle (GO:0043231);;	--	--	hypothetical protein OsI_18770 [Oryza sativa Indica Group]
Os01g0834500	0.00806035	1.30458	up	--	K02973|6.02994e-96|osa:4334580|40S ribosomal protein S23	Ribosome (ko03010)	hypothetical protein OsJ_03983 [Oryza sativa Japonica Group]
Os10g0566700	0.00171186	1.59547	up	--	K04078|2.40109e-68|osa:4349426|10 kDa chaperonin	--	10 kDa chaperonin 1, chloroplastic [Oryza sativa Japonica Group]
Os08g0260000	0.0419883	-1.00132	down	--	--	--	PREDICTED: uncharacterized protein LOC102719609, partial [Oryza brachyantha]
Os05g0508800	0.00750827	-2.6499	down	Biological Process: phosphate-containing compound metabolic process (GO:0006796);; Molecular Function: transferase activity, transferring phosphorus-containing groups (GO:0016772);; Molecular Function: purine ribonucleoside binding (GO:0032550);;	--	--	uncharacterized protein LOC4339269 isoform X2 [Oryza sativa Japonica Group]
Os12g0600100	0.00186839	1.65734	up	--	--	--	ankyrin repeat and SOCS box protein 2 isoform X2 [Oryza sativa Japonica Group]
Os08g0178700	0.0203259	-1.3561	down	Biological Process: phosphate-containing compound metabolic process (GO:0006796);; Biological Process: G-protein coupled receptor signaling pathway (GO:0007186);; Molecular Function: kinase activity (GO:0016301);; Molecular Function: purine ribonucleoside binding (GO:0032550);;	K00901|0|osa:4344812|diacylglycerol kinase 5	Glycerolipid metabolism (ko00561);; Glycerophospholipid metabolism (ko00564);; Phosphatidylinositol signaling system (ko04070)	diacylglycerol kinase 5 [Oryza sativa Japonica Group]
Os01g0784900	0.00114464	-1.34283	down	Molecular Function: protein binding (GO:0005515);; Biological Process: transcription from RNA polymerase II promoter (GO:0006366);;	--	--	transcription factor bHLH123 [Oryza sativa Japonica Group]
Os07g0481200	0.0271527	1.63042	up	Molecular Function: catalytic activity (GO:0003824);; Biological Process: lipid metabolic process (GO:0006629);;	--	--	uncharacterized protein LOC4343234 isoform X2 [Oryza sativa Japonica Group]
Os08g0558100	0.0133588	3.76167	up	--	K13448|1.85214e-138|osa:4346304|probable calcium-binding protein CML48	Plant-pathogen interaction (ko04626)	probable calcium-binding protein CML48 [Oryza sativa Japonica Group]
Os04g0442300	0.000545108	-1.8101	down	Molecular Function: signal transducer activity (GO:0004871);; Biological Process: transcription, DNA-templated (GO:0006351);; Biological Process: hormone-mediated signaling pathway (GO:0009755);; Cellular Component: intrinsic component of membrane (GO:0031224);; Biological Process: intracellular signal transduction (GO:0035556);; Cellular Component: cell part (GO:0044464);;	K14492|4.56296e-151|osa:4335937|two-component response regulator ORR1	Plant hormone signal transduction (ko04075)	two-component response regulator ORR1 [Oryza sativa Japonica Group]
Os02g0655200	0.00013234	3.67257	up	Molecular Function: nucleic acid binding transcription factor activity (GO:0001071);; Molecular Function: nucleic acid binding (GO:0003676);; Biological Process: transcription, DNA-templated (GO:0006351);; Cellular Component: intracellular membrane-bounded organelle (GO:0043231);;	K09286|2.82898e-141|osa:4330191|ethylene-responsive transcription factor 5	--	ethylene-responsive transcription factor 5 [Oryza sativa Japonica Group]
Os12g0615900	0.0203477	1.28106	up	Cellular Component: cullin-RING ubiquitin ligase complex (GO:0031461);; Cellular Component: nuclear lumen (GO:0031981);;	--	--	Os12g0615900, partial [Oryza sativa Japonica Group]
Os01g0667200	0.039413	1.23695	up	Biological Process: developmental process involved in reproduction (GO:0003006);; Biological Process: post-embryonic development (GO:0009791);; Molecular Function: oxidoreductase activity, acting on single donors with incorporation of molecular oxygen, incorporation of two atoms of oxygen (GO:0016702);; Molecular Function: hydrolase activity (GO:0016787);; Cellular Component: intracellular membra…	K17725|0|osa:4326319|persulfide dioxygenase ETHE1 homolog, mitochondrial	Sulfur metabolism (ko00920)	persulfide dioxygenase ETHE1 homolog, mitochondrial [Oryza sativa Japonica Group]
Os01g0835900	0.0164071	-1.25136	down	Cellular Component: chromatin (GO:0000785);; Molecular Function: nucleic acid binding (GO:0003676);; Biological Process: nucleosome organization (GO:0034728);; Cellular Component: intracellular membrane-bounded organelle (GO:0043231);; Molecular Function: protein dimerization activity (GO:0046983);;	--	--	hypothetical protein SEVIR_2G223200v2 [Setaria viridis]
Os02g0630300	0.00122494	4.07861	up	Molecular Function: oxidoreductase activity (GO:0016491);; Molecular Function: cation binding (GO:0043169);; Biological Process: single-organism metabolic process (GO:0044710);;	--	--	Os02g0630300, partial [Oryza sativa Japonica Group]
Os06g0109300	7.02e-06	-2.98817	down	--	--	--	WAT1-related protein At3g30340 [Oryza sativa Japonica Group]
Os07g0687900	0.0169075	6.44108	up	Biological Process: hexose metabolic process (GO:0019318);; Molecular Function: UDP-galactosyltransferase activity (GO:0035250);;	K18819|0|osa:4344351|galactinol synthase 2	Galactose metabolism (ko00052)	galactinol synthase 2 [Oryza sativa Japonica Group]
Os07g0166600	0.00705494	1.06532	up	--	--	--	hypothetical protein OsJ_23216 [Oryza sativa Japonica Group]
Os01g0182200	0.00277685	-1.52466	down	--	--	--	putative small basic membrane integral protein [Oryza sativa Japonica Group]
Os01g0254200	0.0374272	1.41982	up	Cellular Component: intrinsic component of membrane (GO:0031224);;	--	--	uncharacterized protein LOC4327710 [Oryza sativa Japonica Group]
Os04g0509400	0.0189493	-1.51786	down	--	K06995|2.30855e-73|osa:4336363|uncharacterized protein LOC4336363	--	uncharacterized protein LOC4336363 [Oryza sativa Japonica Group]
Os10g0154700	0.00290953	-2.04082	down	Molecular Function: cis-trans isomerase activity (GO:0016859);; Biological Process: peptidyl-proline modification (GO:0018208);; Cellular Component: intrinsic component of membrane (GO:0031224);;	K01802|3.6468e-116|osa:4348134|peptidyl-prolyl cis-trans isomerase	--	peptidyl-prolyl cis-trans isomerase [Oryza sativa Japonica Group]
Os03g0374575	0.0438628	1.96337	up	Molecular Function: nucleic acid binding (GO:0003676);; Molecular Function: small molecule binding (GO:0036094);;	K12900|6.81467e-48|osa:9268085|serine/arginine-rich SC35-like splicing factor SCL33 isoform X1	Spliceosome (ko03040)	Os03g0374575 [Oryza sativa Japonica Group]
Os12g0573200	0.0202682	2.46084	up	--	--	--	scarecrow-like protein 34 [Oryza sativa Japonica Group]
Os01g0328400	5.92e-06	1.56202	up	--	K02977|2.99094e-81|sita:101759893|ubiquitin-40S ribosomal protein S27a-1	Ribosome (ko03010);; Ubiquitin mediated proteolysis (ko04120)	PREDICTED: ubiquitin-40S ribosomal protein S27a-1 [Oryza brachyantha]
Os01g0681200	0.00277279	4.26408	up	Biological Process: single-organism metabolic process (GO:0044710);;	K01897|0|osa:4324393|long chain acyl-CoA synthetase 4 isoform X1	Fatty acid biosynthesis (ko00061);; Fatty acid degradation (ko00071);; Fatty acid metabolism (ko01212);; Peroxisome (ko04146)	long chain acyl-CoA synthetase 4 isoform X1 [Oryza sativa Japonica Group]
Os09g0469300	0.00536356	-1.85241	down	--	--	--	mavicyanin [Oryza sativa Japonica Group]
Os03g0178000	0.00599365	1.54733	up	--	K03231|0|osa:4331812|elongation factor 1-alpha	RNA transport (ko03013)	PREDICTED: elongation factor 1-alpha [Oryza brachyantha]
Os02g0782500	1.2e-10	3.81501	up	Biological Process: response to stress (GO:0006950);; Cellular Component: intracellular part (GO:0044424);;	K13993|5.37656e-84|osa:4330933|18.6 kDa class III heat shock protein	Protein processing in endoplasmic reticulum (ko04141)	18.6 kDa class III heat shock protein [Oryza sativa Japonica Group]
Os01g0205200	0.00519605	1.47461	up	Molecular Function: transition metal ion binding (GO:0046914);;	--	--	Os01g0205200, partial [Oryza sativa Japonica Group]
Os09g0476000	0.01557	-1.47664	down	--	--	--	protein MICROTUBULE BINDING PROTEIN 2C [Oryza sativa Japonica Group]
Os04g0585300	0.0011676	-2.1635	down	--	--	--	hypothetical protein OsJ_15930 [Oryza sativa Japonica Group]
Os03g0577000	0.0246117	1.04308	up	--	K02985|3.14548e-161|osa:4333308|40S ribosomal protein S3-2	Ribosome (ko03010)	40S ribosomal protein S3-2 [Oryza sativa Japonica Group]
Os02g0567800	0.0415477	3.13009	up	Molecular Function: catalytic activity (GO:0003824);;	--	--	tuliposide A-converting enzyme 2, chloroplastic [Oryza sativa Japonica Group]
Os05g0454500	0.0246117	1.98843	up	--	--	--	uncharacterized protein LOC4338976 [Oryza sativa Japonica Group]
Os10g0558900	1.81e-07	-2.56861	down	--	--	--	Os10g0558900 [Oryza sativa Japonica Group]
Os03g0448600	0.0368033	1.96978	up	--	K02180|0|osa:4333230|mitotic checkpoint protein BUB3.1	--	mitotic checkpoint protein BUB3.1 [Oryza sativa Japonica Group]
Os02g0662900	0.0247774	-1.56126	down	--	--	--	Scl1 protein [Oryza sativa Japonica Group]
Os06g0320200	1.82e-06	-2.70745	down	--	K01188|0|osa:4340890|beta-glucosidase 24	Cyanoamino acid metabolism (ko00460);; Starch and sucrose metabolism (ko00500);; Phenylpropanoid biosynthesis (ko00940)	beta-glucosidase 24 [Oryza sativa Japonica Group]
Os01g0876400	0.0180937	2.91685	up	--	--	--	SUN domain-containing protein 4 [Oryza sativa Japonica Group]
Os12g0110300	0.0473931	1.23156	up	Molecular Function: nucleic acid binding transcription factor activity (GO:0001071);; Biological Process: DNA alkylation (GO:0006305);; Biological Process: chromatin organization (GO:0006325);; Biological Process: transcription, DNA-templated (GO:0006351);; Biological Process: multicellular organism development (GO:0007275);;	--	--	RNA-directed DNA methylation 4 [Oryza sativa Japonica Group]
Os06g0567900	0.00179594	3.64853	up	--	K00423|0|osa:4341337|L-ascorbate oxidase isoform X1	Ascorbate and aldarate metabolism (ko00053)	L-ascorbate oxidase isoform X1 [Oryza sativa Japonica Group]
Os02g0259900	2.16e-08	4.05315	up	Biological Process: developmental process involved in reproduction (GO:0003006);; Molecular Function: protein binding (GO:0005515);; Cellular Component: cell-cell junction (GO:0005911);; Biological Process: response to fungus (GO:0009620);; Biological Process: positive regulation of programmed cell death (GO:0043068);;	--	--	Os02g0259900, partial [Oryza sativa Japonica Group]
Os10g0481000	0.000177351	3.52453	up	--	--	--	Os10g0481000 [Oryza sativa Japonica Group]
Os03g0225700	0.000164302	5.64757	up	--	--	--	wall-associated receptor kinase-like 14 [Oryza sativa Japonica Group]
Os01g0918400	3.79e-05	2.07184	up	--	--	--	Os01g0918400 [Oryza sativa Japonica Group]
Os08g0269500	0.0438553	-1.76297	down	--	--	--	uncharacterized protein LOC4345132 [Oryza sativa Japonica Group]
Os03g0399800	0.00440369	-2.11946	down	Molecular Function: nucleic acid binding (GO:0003676);; Biological Process: transcription, DNA-templated (GO:0006351);;	--	--	Os03g0399800, partial [Oryza sativa Japonica Group]
Os10g0557800	0.00872978	-1.69528	down	--	--	--	Os10g0557800, partial [Oryza sativa Japonica Group]
Os03g0654700	5.57e-09	4.41256	up	--	--	--	hypothetical protein EE612_019354 [Oryza sativa]
Os01g0559600	0.00286174	-2.07434	down	--	K01369|0|osa:4324683|vacuolar-processing enzyme	--	hypothetical protein OsJ_02232 [Oryza sativa Japonica Group]
Os01g0727500	2.44e-06	6.46117	up	Cellular Component: intracellular membrane-bounded organelle (GO:0043231);;	K18159|6.69408e-71|osa:4324734|probable complex I intermediate-associated protein 30	--	hypothetical protein OsJ_03324 [Oryza sativa Japonica Group]
Os02g0324700	0.0479451	2.01922	up	--	--	--	Os02g0324700, partial [Oryza sativa Japonica Group]
Os03g0103300	0.00945211	-2.37842	down	--	--	--	hypothetical protein EE612_014763, partial [Oryza sativa]
Os03g0796600	0.00015588	-2.48345	down	--	--	--	uncharacterized protein LOC4334422 [Oryza sativa Japonica Group]
Os11g0115400	0.000666723	2.43211	up	Molecular Function: binding (GO:0005488);; Biological Process: lipid localization (GO:0010876);; Molecular Function: hydrolase activity (GO:0016787);; Biological Process: protein metabolic process (GO:0019538);; Biological Process: establishment of localization (GO:0051234);;	--	--	hypothetical protein EE612_057399 [Oryza sativa]
Os03g0159100	0.0468704	2.47412	up	--	--	--	probable serine/threonine-protein kinase PBL16 isoform X2 [Oryza sativa Japonica Group]
Os07g0280200	0.021557	-1.713	down	Molecular Function: catalytic activity (GO:0003824);; Molecular Function: purine ribonucleoside binding (GO:0032550);; Cellular Component: intracellular membrane-bounded organelle (GO:0043231);;	--	--	4-coumarate--CoA ligase-like 7 [Oryza sativa Japonica Group]
Os07g0116600	0.00173641	-3.17315	down	--	--	--	probable N-acetyltransferase HLS1 [Oryza sativa Japonica Group]
Os02g0673500	4.76e-09	-3.6129	down	--	--	--	uncharacterized protein LOC4330291 isoform X1 [Oryza sativa Japonica Group]
Os10g0564300	0.00497529	1.13741	up	--	K02901|1.59931e-91|osa:4349409|60S ribosomal protein L27-3	Ribosome (ko03010)	60S ribosomal protein L27-3 [Oryza sativa Japonica Group]
Os10g0363300	0.00130113	-1.6474	down	Biological Process: fatty acid metabolic process (GO:0006631);; Cellular Component: acetyl-CoA carboxylase complex (GO:0009317);; Molecular Function: CoA carboxylase activity (GO:0016421);; Molecular Function: ligase activity, forming carbon-nitrogen bonds (GO:0016879);; Molecular Function: purine ribonucleoside binding (GO:0032550);; Molecular Function: cation binding (GO:0043169);; Biological P…	K11262|0|osa:4348450|acetyl-CoA carboxylase 1	Fatty acid biosynthesis (ko00061);; Pyruvate metabolism (ko00620);; Propanoate metabolism (ko00640);; Fatty acid metabolism (ko01212)	acetyl-CoA carboxylase 1 [Oryza sativa Japonica Group]
Os03g0126900	0.00493868	-1.96594	down	Cellular Component: intrinsic component of membrane (GO:0031224);;	--	--	uncharacterized protein LOC4331476 isoform X1 [Oryza sativa Japonica Group]
Os04g0430700	3.32e-07	-2.57338	down	--	--	--	subtilisin-like protease SBT1.7 [Oryza sativa Japonica Group]
Os01g0719800	0.0482965	-1.34917	down	Molecular Function: catalytic activity (GO:0003824);; Biological Process: primary metabolic process (GO:0044238);;	--	--	Os01g0719900 [Oryza sativa Japonica Group]
Os10g0411800	0.00202949	1.67527	up	--	K02962|2.65119e-91|osa:4348608|40S ribosomal protein S17-3	Ribosome (ko03010)	40S ribosomal protein S17-3 [Oryza sativa Japonica Group]
Os11g0605500	0.0443239	2.09296	up	Molecular Function: nucleotide binding (GO:0000166);; Biological Process: fatty acid catabolic process (GO:0009062);; Molecular Function: oxidoreductase activity, acting on the CH-CH group of donors, oxygen as acceptor (GO:0016634);; Cellular Component: microbody (GO:0042579);; Biological Process: oxidation-reduction process (GO:0055114);;	K00232|0|osa:4350881|acyl-coenzyme A oxidase 2, peroxisomal	Fatty acid degradation (ko00071);; beta-Alanine metabolism (ko00410);; alpha-Linolenic acid metabolism (ko00592);; Propanoate metabolism (ko00640);; Biosynthesis of unsaturated fatty acids (ko01040);; Carbon metabolism (ko01200);; Fatty acid metabolism (ko01212);; Peroxisome (ko04146)	acyl-coenzyme A oxidase 2, peroxisomal [Oryza sativa Japonica Group]
Os07g0267300	0.0269315	1.05025	up	Cellular Component: intrinsic component of membrane (GO:0031224);;	--	--	Os07g0267300 [Oryza sativa Japonica Group]
Os02g0670500	0.000139774	-1.81251	down	--	--	--	hypothetical protein OsI_08418 [Oryza sativa Indica Group]
Os01g0269000	0.000203292	2.76075	up	Molecular Function: oxo-acid-lyase activity (GO:0016833);; Cellular Component: intracellular membrane-bounded organelle (GO:0043231);;	K01640|0|osa:4326266|hydroxymethylglutaryl-CoA lyase, mitochondrial	Synthesis and degradation of ketone bodies (ko00072);; Valine, leucine and isoleucine degradation (ko00280);; Butanoate metabolism (ko00650);; Peroxisome (ko04146)	hydroxymethylglutaryl-CoA lyase, mitochondrial [Oryza sativa Japonica Group]
Os10g0542900	0.0144742	4.51261	up	Molecular Function: hydrolase activity, hydrolyzing O-glycosyl compounds (GO:0004553);; Biological Process: polysaccharide metabolic process (GO:0005976);; Biological Process: aminoglycan catabolic process (GO:0006026);; Molecular Function: intramolecular lyase activity (GO:0016872);; Biological Process: response to external biotic stimulus (GO:0043207);; Biological Process: cell wall macromolecu…	K20547|6.25859e-169|osa:4349267|chitinase 8	Amino sugar and nucleotide sugar metabolism (ko00520);; MAPK signaling pathway - plant (ko04016)	chitinase 8 [Oryza sativa Japonica Group]
Os03g0362200	0.00547855	2.3994	up	--	--	--	uncharacterized protein LOC4332894 [Oryza sativa Japonica Group]
Os06g0591600	0.00315885	-1.14525	down	Molecular Function: tetrapyrrole binding (GO:0046906);;	--	--	two-on-two hemoglobin-3 [Oryza sativa Japonica Group]
Os10g0419300	0.0204913	2.15557	up	Molecular Function: nucleic acid binding transcription factor activity (GO:0001071);; Molecular Function: DNA binding (GO:0003677);; Molecular Function: protein binding (GO:0005515);; Biological Process: transcription, DNA-templated (GO:0006351);; Cellular Component: intracellular membrane-bounded organelle (GO:0043231);;	K08967|0|osa:4348646|heat stress transcription factor A-2c	Cysteine and methionine metabolism (ko00270)	heat stress transcription factor A-2c-like [Oryza sativa Japonica Group]
Os09g0403300	0.00012007	-2.18642	down	--	K10717|0|osa:9269428|cytokinin hydroxylase	Zeatin biosynthesis (ko00908)	putative cytochrome P450 monooxygenase CYP72A5 [Oryza sativa Japonica Group]
Os07g0185900	0.00526132	-1.46783	down	--	--	--	unknown protein [Oryza sativa Japonica Group]
Os03g0124000	1.04e-05	-1.26068	down	Molecular Function: nucleic acid binding (GO:0003676);; Biological Process: transcription, DNA-templated (GO:0006351);; Cellular Component: intracellular membrane-bounded organelle (GO:0043231);;	--	--	homeobox protein BEL1 homolog [Oryza sativa Japonica Group]
Os01g0179800	0.00543648	-1.81173	down	--	K23544|0|osa:4325348|probable serine incorporator	--	hypothetical protein OsJ_00615 [Oryza sativa Japonica Group]
Os05g0468750	0.0374272	3.54943	up	--	K03320|0|osa:4339064|ammonium transporter 2 member 1	--	ammonium transporter 2 member 1 [Oryza sativa Japonica Group]
Os01g0115100	0.00750827	-1.29659	down	Biological Process: transcription, DNA-templated (GO:0006351);;	--	--	hypothetical protein OsJ_00126 [Oryza sativa Japonica Group]
xxx_newGene_9334	0.0476488	2.81087	up	Cellular Component: intrinsic component of membrane (GO:0031224);;	--	--	hypothetical protein [Oryza sativa Japonica Group]
Os02g0503400	0.00572115	1.38462	up	--	K02918|1.66588e-75|osa:4329423|60S ribosomal protein L35	Ribosome (ko03010)	60S ribosomal protein L35 [Oryza sativa Japonica Group]
Os01g0175700	2.2e-09	-3.36597	down	--	K24194|0|osa:107275818|boron transporter 4-like	--	boron transporter 4 [Oryza sativa Japonica Group]
Os05g0207300	0.00573638	1.21816	up	--	K02868|2.3279e-115|obr:102707812|60S ribosomal protein L11	Ribosome (ko03010)	PREDICTED: 60S ribosomal protein L11 [Oryza brachyantha]
Os10g0450900	0.00022548	4.01991	up	--	--	--	glycine-rich cell wall structural protein 2 [Oryza sativa Japonica Group]
Os05g0586700	2.27e-09	8.88289	up	Cellular Component: intrinsic component of membrane (GO:0031224);; Cellular Component: intracellular membrane-bounded organelle (GO:0043231);;	--	--	Os05g0586700 [Oryza sativa Japonica Group]
Os09g0420700	0.0122616	1.29986	up	Biological Process: transition metal ion transport (GO:0000041);; Molecular Function: copper ion binding (GO:0005507);; Cellular Component: mitochondrial envelope (GO:0005740);;	K02260|1.50132e-44|osa:4347084|cytochrome c oxidase copper chaperone 1	Oxidative phosphorylation (ko00190)	copper chaperone COX17-1-like protein [Oryza sativa Japonica Group]
Os02g0232000	0.00058734	2.2582	up	Molecular Function: nucleic acid binding transcription factor activity (GO:0001071);; Molecular Function: DNA binding (GO:0003677);; Biological Process: transcription, DNA-templated (GO:0006351);; Cellular Component: intracellular membrane-bounded organelle (GO:0043231);;	K09419|6.50903e-139|osa:4328809|heat stress transcription factor C-2a	--	heat stress transcription factor C-2a [Oryza sativa Japonica Group]
Os03g0329500	0.0365329	1.69556	up	--	K01179|0|osa:4332724|endoglucanase 9	Starch and sucrose metabolism (ko00500)	endoglucanase 9 [Oryza sativa Japonica Group]
[truncated: 430 more rows]
