# Supplementary material for: Research on lncRNA related to drought resistance of Shanlan upland rice
Source: BMC Genomics. 2022 Apr 30;23:336. doi: 10.1186/s12864-022-08546-0 (PMC9055766; doi:10.1186/s12864-022-08546-0)
Supplement: Supplementary file 10 — Additional file 10: Table S010. The relationship of miRNA with lncRNA and mRNA. [file 12864_2022_8546_MOESM10_ESM.xlsx]

## Sheet: Sheet1
Table S010. The relationship of miRNA with lncRNA and mRNA
miRNA	Target
osa-miR812d	MSTRG.16893.1;MSTRG.2664.1;MSTRG.22663.6;MSTRG.12888.1;MSTRG.16632.1;MSTRG.42549.1;MSTRG.5637.1;MSTRG.5637.2;MSTRG.42500.4;MSTRG.26074.1
osa-miR156i	MSTRG.23319.1
Novel_1_4618	MSTRG.1947.2;MSTRG.1947.1;MSTRG.18704.1;MSTRG.30683.1;MSTRG.2310.1
Novel_11_43833	MSTRG.34237.2;MSTRG.15053.7;MSTRG.15053.5;MSTRG.37891.7
Novel_4_17268	MSTRG.17830.1
osa-miR2090	MSTRG.9519.3
osa-miR11337-5p	MSTRG.39848.1;MSTRG.17499.1;MSTRG.5541.1;MSTRG.1866.1;MSTRG.25722.1;MSTRG.34268.1;MSTRG.36511.15;MSTRG.36511.16;MSTRG.40196.1;MSTRG.12756.1;MSTRG.36015.1
osa-miR11340-5p	MSTRG.20433.1;MSTRG.10535.1;MSTRG.25248.1;MSTRG.25248.2
Novel_5_21400	MSTRG.34804.1;MSTRG.34804.2;MSTRG.34804.3
osa-miR393b-3p	MSTRG.33092.1
Novel_2_8689	MSTRG.5336.2
osa-miR2931	MSTRG.37557.6;MSTRG.21514.14;MSTRG.3148.1;MSTRG.14943.1;MSTRG.42730.1
osa-miR172d-3p	MSTRG.20162.5;MSTRG.15789.1;MSTRG.18860.1
Novel_1_2613	MSTRG.10141.5
Novel_3_11672	MSTRG.5637.2;MSTRG.5637.1
Novel_7_31095	MSTRG.2338.1
Novel_8_35275	MSTRG.15109.1;MSTRG.14602.2;MSTRG.36511.15;MSTRG.36511.16
Novel_12_45703	MSTRG.19663.9
osa-miR530-3p	MSTRG.1869.11;MSTRG.1869.9
osa-miR1862f	MSTRG.3354.1;MSTRG.12934.1;MSTRG.2305.1;MSTRG.17927.1;MSTRG.25824.1;MSTRG.41603.1;MSTRG.21286.1
Novel_6_26278	MSTRG.30385.1;MSTRG.15138.1;MSTRG.40196.1;MSTRG.32391.1
Novel_1_881	MSTRG.18333.1;MSTRG.43546.1;MSTRG.41511.4;MSTRG.34356.1;MSTRG.5454.1;MSTRG.8202.1;MSTRG.27027.5;MSTRG.39163.1
Novel_11_44327	MSTRG.44412.1;MSTRG.4882.1;MSTRG.19663.9
osa-miR2867-5p	MSTRG.25194.5;MSTRG.25194.3;MSTRG.25194.2
Novel_2_9057	MSTRG.42754.2;MSTRG.22663.6;MSTRG.26236.1
osa-miR319b	MSTRG.28856.1
osa-miR11343-3p	MSTRG.12363.1;MSTRG.7228.1;MSTRG.41404.1;MSTRG.16647.1;MSTRG.40196.1;MSTRG.10479.20;MSTRG.18092.1;MSTRG.37830.1;MSTRG.14777.1;MSTRG.18092.2;MSTRG.32050.2;MSTRG.16632.1;MSTRG.19663.9;MSTRG.37830.3
Novel_3_14139	MSTRG.15053.7;MSTRG.31108.1;MSTRG.15053.5;MSTRG.35896.1;MSTRG.37841.1
Novel_1_2889	MSTRG.2338.1
osa-miR167j	MSTRG.14943.1
osa-miR812s	MSTRG.42500.4;MSTRG.26074.1;MSTRG.2664.1;MSTRG.12888.1;MSTRG.22663.6;MSTRG.35736.1
Novel_2_6345	MSTRG.36897.2
osa-miR171d-3p	MSTRG.23160.1;MSTRG.23160.2;MSTRG.28732.3
Novel_2_8058	MSTRG.44240.1;MSTRG.10106.1;MSTRG.30416.1;MSTRG.32391.1
Novel_2_10642	MSTRG.5541.1;MSTRG.6629.1;MSTRG.36897.2;MSTRG.5020.1;MSTRG.33473.1;MSTRG.32391.1;MSTRG.2127.1;MSTRG.22188.3
Novel_2_8034	MSTRG.44240.1;MSTRG.30416.1;MSTRG.10106.1
Novel_4_19448	MSTRG.41710.7;MSTRG.41710.6;MSTRG.41710.5;MSTRG.41710.12;MSTRG.41710.2;MSTRG.41710.9;MSTRG.41710.11;MSTRG.41710.10
Novel_3_12210	MSTRG.29359.1;MSTRG.4230.1
Novel_7_28548	MSTRG.3706.1
osa-miR156e	MSTRG.23319.1
Novel_12_45742	MSTRG.21652.1
Novel_7_30125	MSTRG.10873.1
osa-miR171b	MSTRG.28732.3;MSTRG.23160.2;MSTRG.23160.1
osa-miR164b	MSTRG.10925.8;MSTRG.29052.1
Novel_11_44328	MSTRG.19663.9;MSTRG.44412.1;MSTRG.4882.1
Novel_4_18326	MSTRG.29959.1
osa-miR5340	MSTRG.23407.1
osa-miR171e-3p	MSTRG.28732.3;MSTRG.23160.2;MSTRG.23160.1
osa-miR167e-5p	MSTRG.14943.1
osa-miR1425-3p	MSTRG.20064.1;MSTRG.4740.1;MSTRG.35705.1
osa-miR5494	MSTRG.18480.1
osa-miR408-5p	MSTRG.1869.9;MSTRG.35555.1;MSTRG.1869.11
Novel_3_13415	MSTRG.15053.5;MSTRG.37891.7;MSTRG.15053.7;MSTRG.34237.2;MSTRG.28894.1
osa-miR1850.1	MSTRG.20677.1;MSTRG.39747.1;MSTRG.40196.1
Novel_5_22674	MSTRG.15577.12;MSTRG.10479.20
osa-miR814c	MSTRG.22188.3
osa-miR2121b	MSTRG.34034.1;MSTRG.34034.2;MSTRG.4230.1;MSTRG.14907.4;MSTRG.14907.2
Novel_12_45759	MSTRG.11139.12;MSTRG.11139.19;MSTRG.11139.17
osa-miR171f-3p	MSTRG.23160.1;MSTRG.23160.2;MSTRG.28732.3
Novel_10_41023	MSTRG.27289.1;MSTRG.8898.4;MSTRG.8898.3;MSTRG.8898.9
Novel_8_33578	MSTRG.10887.1
osa-miR166a-5p	MSTRG.12254.1
Novel_10_39151	MSTRG.28916.5;MSTRG.33508.1;MSTRG.40736.1;MSTRG.11819.5;MSTRG.21925.1;MSTRG.38692.1;MSTRG.10142.5;MSTRG.2867.1;MSTRG.9258.1;MSTRG.28641.1;MSTRG.11819.6;MSTRG.24811.1;MSTRG.6820.1;MSTRG.18168.1;MSTRG.16863.1;MSTRG.29744.1;MSTRG.6569.1;MSTRG.37715.1;MSTRG.10142.3;MSTRG.11819.4;MSTRG.39916.1;MSTRG.11159.1;MSTRG.10142.1;MSTRG.10142.2;MSTRG.11819.3;MSTRG.6917.1;MSTRG.14676.1;MSTRG.9885.1;MSTRG.12367.1…
osa-miR5150-3p	MSTRG.15577.12;MSTRG.7076.1;MSTRG.28894.1
Novel_5_21279	MSTRG.44540.1
osa-miR171e-5p	MSTRG.23160.1;MSTRG.23160.2;MSTRG.13274.1
osa-miR166g-5p	MSTRG.2821.1
osa-miR827	MSTRG.19261.3
osa-miR156g-3p	MSTRG.26453.4;MSTRG.26453.1;MSTRG.26453.3;MSTRG.26453.5;MSTRG.26453.2;MSTRG.42096.1;MSTRG.26453.6
Novel_12_47429	MSTRG.11548.1
Novel_3_11153	MSTRG.33909.1;MSTRG.42729.1
Novel_1_5244	MSTRG.43423.1
Novel_9_36966	MSTRG.8898.4;MSTRG.27289.1;MSTRG.8898.9;MSTRG.8898.3
osa-miR394	MSTRG.17661.2;MSTRG.15927.1
Novel_6_27901	MSTRG.21652.1
osa-miR1847.1	MSTRG.15364.1
osa-miR5788	MSTRG.13973.1;MSTRG.2139.1;MSTRG.28181.1;MSTRG.3480.5;MSTRG.36897.2;MSTRG.10986.1;MSTRG.8463.1;MSTRG.41601.1;MSTRG.22188.3;MSTRG.14982.1;MSTRG.42730.1
osa-miR5809	MSTRG.24979.1;MSTRG.13434.1;MSTRG.41582.1;MSTRG.15389.1;MSTRG.40696.3;MSTRG.41582.2;MSTRG.41582.5;MSTRG.10661.1;MSTRG.35028.2;MSTRG.25047.1;MSTRG.35028.1;MSTRG.17849.1;MSTRG.9676.1;MSTRG.40696.1;MSTRG.35117.1;MSTRG.35028.3;MSTRG.30776.1;MSTRG.29670.1;MSTRG.41582.8
osa-miR5075	MSTRG.37120.1;MSTRG.12820.1;MSTRG.35028.2;MSTRG.34463.1;MSTRG.39058.5;MSTRG.34355.1;MSTRG.19261.3;MSTRG.37142.1;MSTRG.25247.1;MSTRG.35028.3;MSTRG.24759.1;MSTRG.39058.9;MSTRG.22105.3;MSTRG.40696.1;MSTRG.35117.1;MSTRG.39058.7;MSTRG.35028.1;MSTRG.2477.1;MSTRG.32443.1;MSTRG.7485.1
Novel_9_37979	MSTRG.39287.1
osa-miR2928	MSTRG.12360.1;MSTRG.16060.11;MSTRG.4623.1;MSTRG.16060.6;MSTRG.16060.8;MSTRG.16060.4;MSTRG.5573.1
osa-miR5074	MSTRG.42818.1
osa-miR396d	MSTRG.34501.1;MSTRG.41715.1
osa-miR5821	MSTRG.22200.7;MSTRG.6961.3
Novel_5_21500	MSTRG.8282.1;MSTRG.30507.1
osa-miR815b	MSTRG.17180.9;MSTRG.44299.1;MSTRG.35818.9;MSTRG.17180.6
Novel_10_39337	MSTRG.2139.1;MSTRG.32391.1;MSTRG.36897.2
osa-miR172b	MSTRG.10030.1
Novel_8_32418	MSTRG.5637.1;MSTRG.26074.1;MSTRG.5637.2
osa-miR812i	MSTRG.16893.1;MSTRG.2664.1;MSTRG.12888.1;MSTRG.16632.1;MSTRG.42549.1;MSTRG.35736.1;MSTRG.26074.1;MSTRG.42500.4
Novel_4_19029	MSTRG.34804.1;MSTRG.34804.2;MSTRG.15577.12;MSTRG.15441.1;MSTRG.35919.1;MSTRG.34804.3;MSTRG.28641.1;MSTRG.40589.1;MSTRG.7076.1
osa-miR529b	MSTRG.7167.3;MSTRG.7167.4;MSTRG.34753.1;MSTRG.34753.2;MSTRG.5273.1;MSTRG.27125.1;MSTRG.7167.7
Novel_5_20446	MSTRG.3706.1
osa-miR1429-5p	MSTRG.33888.5;MSTRG.25076.3;MSTRG.30014.1;MSTRG.30014.3;MSTRG.28695.2;MSTRG.30014.4;MSTRG.15998.1;MSTRG.21334.1;MSTRG.25091.1;MSTRG.30014.6;MSTRG.30014.5;MSTRG.33888.1;MSTRG.24637.1;MSTRG.37138.1
Novel_5_21843	MSTRG.4333.1
osa-miR814a	MSTRG.22188.3
osa-miR812t	MSTRG.26074.1
osa-miR3979-5p	MSTRG.24487.1;MSTRG.34821.1;MSTRG.34508.1;MSTRG.20514.1;MSTRG.21326.1;MSTRG.11534.1;MSTRG.25047.1;MSTRG.6811.1;MSTRG.9963.2
Novel_9_37277	MSTRG.1963.1;MSTRG.28739.1;MSTRG.10500.2;MSTRG.10500.4;MSTRG.37120.1;MSTRG.10500.3;MSTRG.16195.1;MSTRG.10500.1;MSTRG.36276.5
Novel_9_37699	MSTRG.9440.1;MSTRG.9440.2;MSTRG.42730.1
Novel_11_44629	MSTRG.19860.1
osa-miR164e	MSTRG.29052.1;MSTRG.39676.1;MSTRG.39070.3;MSTRG.40538.1
osa-miR1862g	MSTRG.41603.1;MSTRG.21286.1;MSTRG.17927.1;MSTRG.25824.1;MSTRG.12934.1;MSTRG.2305.1;MSTRG.3354.1
Novel_5_22433	MSTRG.5573.1;MSTRG.36036.1
osa-miR6249b	MSTRG.36374.1;MSTRG.30869.1
osa-miR5083	MSTRG.6078.1;MSTRG.24585.1;MSTRG.12806.1;MSTRG.4104.1
Novel_7_30257	MSTRG.44240.1;MSTRG.10106.1;MSTRG.30416.1
osa-miR399j	MSTRG.33246.1;MSTRG.15764.3;MSTRG.15764.4;MSTRG.15764.2
Novel_11_41649	MSTRG.36897.2;MSTRG.32391.1
Novel_1_3192	MSTRG.25824.1
Novel_2_8775	MSTRG.31790.1;MSTRG.1816.1;MSTRG.36610.2;MSTRG.24716.1;MSTRG.43829.2;MSTRG.30533.1;MSTRG.43937.2;MSTRG.15153.2;MSTRG.14541.1;MSTRG.2226.1;MSTRG.35600.1;MSTRG.14541.2;MSTRG.14363.2;MSTRG.23873.2;MSTRG.1993.2;MSTRG.7599.1;MSTRG.36610.1;MSTRG.2500.2;MSTRG.13935.1;MSTRG.32990.1;MSTRG.2500.1;MSTRG.9785.1;MSTRG.22293.1;MSTRG.31966.2;MSTRG.9827.3;MSTRG.42924.1;MSTRG.1993.1;MSTRG.36252.2;MSTRG.42485.1;MS…
osa-miR2096-5p	MSTRG.10284.1
osa-miR162a	MSTRG.17132.5;MSTRG.17132.4
Novel_9_36127	MSTRG.42500.4
osa-miR5831	MSTRG.7289.2;MSTRG.18687.8
osa-miR166l-5p	MSTRG.7390.1
Novel_9_37155	MSTRG.36511.16;MSTRG.36511.15;MSTRG.14602.2;MSTRG.15109.1
osa-miR5801c-5p	MSTRG.33982.2
osa-miR11339-5p	MSTRG.34804.2;MSTRG.10479.20;MSTRG.40196.1;MSTRG.34804.1;MSTRG.7228.1;MSTRG.40919.1;MSTRG.16632.1;MSTRG.7921.1;MSTRG.34804.3;MSTRG.19663.9;MSTRG.10253.6;MSTRG.1292.5;MSTRG.14777.1;MSTRG.1292.4;MSTRG.33243.1
Novel_3_11958	MSTRG.3706.1
Novel_10_39409	MSTRG.19663.9
osa-miR5150-5p	MSTRG.16850.1
osa-miR166j-5p	MSTRG.3438.1
osa-miR3982-3p	MSTRG.30385.1
osa-miR167i-3p	MSTRG.11979.3;MSTRG.35235.2;MSTRG.35235.1;MSTRG.14943.1
osa-miR5337b	MSTRG.9575.1;MSTRG.4974.5
Novel_10_40078	MSTRG.27289.1;MSTRG.8898.4;MSTRG.8898.3;MSTRG.8898.9
Novel_3_13756	MSTRG.19701.14;MSTRG.29958.5;MSTRG.24460.7;MSTRG.37715.1;MSTRG.28731.1;MSTRG.15956.1;MSTRG.7398.1;MSTRG.3412.1;MSTRG.13467.1;MSTRG.11908.1;MSTRG.28731.2
Novel_8_32202	MSTRG.39287.1
osa-miR530-5p	MSTRG.17336.1;MSTRG.28823.1
Novel_7_28965	MSTRG.28407.1;MSTRG.3893.1;MSTRG.32050.2;MSTRG.10142.3;MSTRG.10142.1;MSTRG.8078.1;MSTRG.29020.1
Novel_5_23438	MSTRG.41710.6;MSTRG.41710.5;MSTRG.41710.7;MSTRG.41710.11;MSTRG.41710.10;MSTRG.41710.2;MSTRG.41710.12;MSTRG.41710.9
osa-miR2871a-3p	MSTRG.30260.1;MSTRG.1826.1
osa-miR2100-5p	MSTRG.14953.1
osa-miR5539b	MSTRG.6849.4
Novel_3_12617	MSTRG.31342.3
osa-miR812v	MSTRG.26074.1;MSTRG.42500.4;MSTRG.16893.1;MSTRG.44467.1
Novel_2_10661	MSTRG.21652.1
osa-miR156j-5p	MSTRG.23319.1
osa-miR5485	MSTRG.15653.1
osa-miR167d-5p	MSTRG.14943.1
Novel_8_32860	MSTRG.45325.1;MSTRG.2423.1;MSTRG.12500.1;MSTRG.29868.1;MSTRG.18691.1;MSTRG.6810.1;MSTRG.29637.1;MSTRG.6549.1;MSTRG.29599.1;MSTRG.24490.1;MSTRG.23156.1;MSTRG.6172.1;MSTRG.32236.1;MSTRG.25989.1;MSTRG.6682.1;MSTRG.6988.1;MSTRG.39255.1;MSTRG.25755.1;MSTRG.29694.1;MSTRG.16129.1;MSTRG.29678.1;MSTRG.6549.2;MSTRG.25235.1;MSTRG.37202.1
Novel_1_4486	MSTRG.15577.12
Novel_2_9827	MSTRG.37891.7;MSTRG.15053.5;MSTRG.15053.7;MSTRG.34237.2;MSTRG.28894.1
osa-miR171i-5p	MSTRG.23160.2;MSTRG.23160.1;MSTRG.22110.3;MSTRG.22110.2
osa-miR818a	MSTRG.28731.1;MSTRG.18138.5;MSTRG.18138.3;MSTRG.18168.1;MSTRG.18138.1;MSTRG.30385.1;MSTRG.39751.1;MSTRG.3412.1;MSTRG.6629.1;MSTRG.32391.1;MSTRG.4623.1;MSTRG.37715.1;MSTRG.24460.7;MSTRG.36015.1;MSTRG.13425.1;MSTRG.29433.1;MSTRG.35372.1;MSTRG.28731.2;MSTRG.18138.4;MSTRG.2701.1;MSTRG.18138.2;MSTRG.7398.1;MSTRG.4974.5;MSTRG.11969.1
osa-miR167e-3p	MSTRG.11979.3;MSTRG.35235.1;MSTRG.35235.2;MSTRG.14943.1
Novel_5_20836	MSTRG.16893.1;MSTRG.34253.1;MSTRG.22372.1;MSTRG.12888.1;MSTRG.34253.2;MSTRG.22663.6;MSTRG.42549.1;MSTRG.16513.1;MSTRG.34253.3;MSTRG.5637.1;MSTRG.42500.4;MSTRG.26074.1;MSTRG.5637.2
Novel_3_10959	MSTRG.23493.1;MSTRG.40196.1;MSTRG.30683.1;MSTRG.17830.1;MSTRG.26101.1
Novel_11_41654	MSTRG.7921.1;MSTRG.34804.3;MSTRG.1292.4;MSTRG.1292.5;MSTRG.14777.1;MSTRG.3412.1;MSTRG.34804.1;MSTRG.7958.1;MSTRG.34804.2;MSTRG.42754.2
Novel_11_43135	MSTRG.22309.3;MSTRG.22309.2;MSTRG.22309.1
Novel_12_44953	MSTRG.33473.1
Novel_5_22643	MSTRG.34400.1
Novel_2_10147	MSTRG.40196.1;MSTRG.23493.1;MSTRG.30683.1;MSTRG.2310.1;MSTRG.18704.1;MSTRG.26101.1;MSTRG.17830.1;MSTRG.35616.1
Novel_8_31957	MSTRG.2378.3;MSTRG.2378.2;MSTRG.43582.2;MSTRG.25194.4;MSTRG.25194.3;MSTRG.3480.5;MSTRG.25194.1;MSTRG.25194.5;MSTRG.2378.1;MSTRG.28850.4;MSTRG.25194.2
osa-miR5143a	MSTRG.29273.1
osa-miR812g	MSTRG.42500.4;MSTRG.26074.1;MSTRG.35736.1;MSTRG.16632.1;MSTRG.42549.1;MSTRG.16893.1;MSTRG.2664.1;MSTRG.12888.1
Novel_3_10889	MSTRG.4333.1
Novel_6_25572	MSTRG.44240.1;MSTRG.30416.1;MSTRG.10106.1
Novel_11_44171	MSTRG.38497.2;MSTRG.19909.1;MSTRG.33253.1;MSTRG.37117.1;MSTRG.38497.1
osa-miR810b.2	MSTRG.32610.1
Novel_4_18729	MSTRG.5336.2
Novel_9_37663	MSTRG.2139.1;MSTRG.14982.1;MSTRG.38498.1;MSTRG.10873.1;MSTRG.3480.5;MSTRG.13425.1;MSTRG.7289.2
Novel_9_37362	MSTRG.6326.4;MSTRG.35871.1;MSTRG.6326.1;MSTRG.6326.3;MSTRG.41253.1;MSTRG.2610.1;MSTRG.6326.2;MSTRG.37152.2;MSTRG.6557.2;MSTRG.10157.4;MSTRG.41253.2
osa-miR166c-5p	MSTRG.7390.1;MSTRG.12254.1;MSTRG.17499.1;MSTRG.35896.1
osa-miR396h	MSTRG.41715.1;MSTRG.34501.1
osa-miR11336-3p	MSTRG.37830.3;MSTRG.10479.20;MSTRG.19663.9;MSTRG.16647.1;MSTRG.41404.1;MSTRG.32050.2;MSTRG.37830.1
Novel_8_35473	MSTRG.21652.1
Novel_4_16038	MSTRG.12871.1;MSTRG.11355.1
Novel_1_1714	MSTRG.41582.1;MSTRG.41582.8;MSTRG.40196.1
osa-miR5806	MSTRG.11285.1
osa-miR1848	MSTRG.33864.1;MSTRG.12643.1;MSTRG.43809.1;MSTRG.15389.1;MSTRG.3190.3;MSTRG.25047.1
osa-miR171d-5p	MSTRG.23160.1;MSTRG.23160.2
Novel_7_29457	MSTRG.30385.1;MSTRG.36511.15;MSTRG.36511.16
Novel_6_26355	MSTRG.8816.2;MSTRG.28908.1
Novel_6_28179	MSTRG.15053.7;MSTRG.8583.1;MSTRG.15053.5;MSTRG.37891.7;MSTRG.34237.2;MSTRG.8583.2
Novel_11_43527	MSTRG.8898.4;MSTRG.27289.1;MSTRG.8898.9;MSTRG.8898.3
Novel_2_9597	MSTRG.36335.1;MSTRG.38965.1;MSTRG.1292.4;MSTRG.1292.5;MSTRG.16279.2;MSTRG.6549.2;MSTRG.39374.1;MSTRG.6549.1
osa-miR812p	MSTRG.12888.1;MSTRG.22663.6;MSTRG.2664.1;MSTRG.16893.1;MSTRG.26074.1;MSTRG.42500.4;MSTRG.16632.1
Novel_2_7770	MSTRG.35616.1;MSTRG.30683.1;MSTRG.2310.1;MSTRG.18704.1
osa-miR5076	MSTRG.27128.9
osa-miR2863a	MSTRG.31016.1
osa-miR6245b-5p	MSTRG.34682.1
Novel_2_10041	MSTRG.23319.1;MSTRG.31016.1
osa-miR5540	MSTRG.26083.1;MSTRG.10860.1;MSTRG.37367.1
osa-miR156b-5p	MSTRG.23319.1
Novel_5_20670	MSTRG.1847.1
osa-miR5833	MSTRG.41000.1;MSTRG.40610.1
Novel_9_36419	MSTRG.43423.1
Novel_6_27860	MSTRG.10535.1;MSTRG.5637.1;MSTRG.44467.1;MSTRG.2664.1;MSTRG.42500.4;MSTRG.26074.1;MSTRG.5637.2
osa-miR160a-5p	MSTRG.35555.1;MSTRG.36083.2
Novel_12_47241	MSTRG.8898.3;MSTRG.8898.9;MSTRG.27289.1;MSTRG.8898.4
Novel_6_27186	MSTRG.34237.2
osa-miR810b.1	MSTRG.34839.1
osa-miR2870	MSTRG.39123.1
Novel_1_2005	MSTRG.12888.1;MSTRG.12528.1
Novel_6_26799	MSTRG.43423.1
Novel_11_43459	MSTRG.34237.2;MSTRG.37891.7;MSTRG.15053.5;MSTRG.15053.7
Novel_3_11260	MSTRG.28850.4
osa-miR1862b	MSTRG.41603.1;MSTRG.21286.1;MSTRG.36897.2
osa-miR2120b-3p	MSTRG.6076.1;MSTRG.6664.1;MSTRG.42729.1;MSTRG.42856.1;MSTRG.40056.1;MSTRG.16857.1;MSTRG.11355.1;MSTRG.9862.1;MSTRG.41540.5;MSTRG.40394.1;MSTRG.37326.1;MSTRG.42856.4
Novel_11_43708	MSTRG.16655.1
Novel_2_7062	MSTRG.19555.1;MSTRG.41511.4
Novel_4_19535	MSTRG.33473.1
osa-miR1862e	MSTRG.2694.1;MSTRG.3678.1
Novel_2_8332	MSTRG.37557.6
osa-miR156d	MSTRG.23319.1
osa-miR167d-3p	MSTRG.36585.2;MSTRG.14943.1
osa-miR168a-5p	MSTRG.10298.1
Novel_8_32983	MSTRG.6112.1;MSTRG.6112.2;MSTRG.10986.1
osa-miR164f	MSTRG.10925.8;MSTRG.29052.1
Novel_9_37809	MSTRG.2182.4;MSTRG.13973.1
osa-miR5498	MSTRG.2535.2
osa-miR812b	MSTRG.22663.6;MSTRG.12888.1;MSTRG.16893.1;MSTRG.2664.1;MSTRG.42549.1;MSTRG.16632.1;MSTRG.5637.1;MSTRG.5637.2;MSTRG.26074.1;MSTRG.42500.4
osa-miR390-5p	MSTRG.40973.2
Novel_2_6796	MSTRG.41582.8;MSTRG.40196.1;MSTRG.41582.1
osa-miR167i-5p	MSTRG.14943.1
osa-miR167f	MSTRG.14943.1
osa-miR815a	MSTRG.35818.9;MSTRG.17180.6;MSTRG.17180.9;MSTRG.44299.1
osa-miR7695-5p	MSTRG.27058.1
Novel_9_37805	MSTRG.43293.1;MSTRG.4230.1;MSTRG.22450.1;MSTRG.10298.1;MSTRG.32659.1
osa-miR812k	MSTRG.12888.1;MSTRG.16893.1;MSTRG.16632.1;MSTRG.42500.4;MSTRG.26074.1
osa-miR5492	MSTRG.32048.3;MSTRG.32048.2
Novel_3_15263	MSTRG.8898.3;MSTRG.8898.9;MSTRG.27289.1;MSTRG.8898.4
Novel_5_22567	MSTRG.16857.1;MSTRG.11355.1;MSTRG.12871.1
osa-miR167h-5p	MSTRG.14943.1
osa-miR160c-5p	MSTRG.36083.2;MSTRG.35555.1
osa-miR167b	MSTRG.14943.1
Novel_6_27488	MSTRG.7228.1;MSTRG.12363.1;MSTRG.16647.1;MSTRG.28823.1;MSTRG.41404.1;MSTRG.5299.3;MSTRG.18092.2;MSTRG.18092.1;MSTRG.32050.2
osa-miR812c	MSTRG.5637.1;MSTRG.5637.2;MSTRG.26074.1;MSTRG.42500.4;MSTRG.12888.1;MSTRG.22663.6;MSTRG.2664.1;MSTRG.16893.1;MSTRG.42549.1;MSTRG.16632.1
osa-miR396c-5p	MSTRG.15985.1;MSTRG.15985.2
osa-miR11344-5p	MSTRG.23880.1
osa-miR164c	MSTRG.29052.1;MSTRG.10925.8
Novel_10_40104	MSTRG.2703.1
osa-miR160b-5p	MSTRG.35555.1;MSTRG.36083.2
Novel_8_33865	MSTRG.2338.1
osa-miR5522	MSTRG.41710.10;MSTRG.41710.11;MSTRG.41710.12;MSTRG.45210.2
Novel_4_18220	MSTRG.36897.2
osa-miR5802	MSTRG.22046.1
Novel_11_44361	MSTRG.22189.5;MSTRG.22189.3;MSTRG.26610.4;MSTRG.22189.2;MSTRG.22189.1;MSTRG.22189.4
Novel_7_30123	MSTRG.26074.1
Novel_3_15835	MSTRG.1947.2;MSTRG.1947.1;MSTRG.18704.1;MSTRG.17830.1
osa-miR156h-5p	MSTRG.23319.1
osa-miR396f-5p	MSTRG.5158.1
Novel_12_46480	MSTRG.1292.5;MSTRG.1292.4;MSTRG.14777.1;MSTRG.3412.1;MSTRG.34804.3;MSTRG.7921.1;MSTRG.42754.2;MSTRG.34804.1;MSTRG.7958.1;MSTRG.34804.2
osa-miR2120b-5p	MSTRG.38272.1;MSTRG.42856.4;MSTRG.37431.1;MSTRG.24657.2;MSTRG.6076.1;MSTRG.42729.1;MSTRG.11355.1;MSTRG.42856.1
Novel_4_18397	MSTRG.21652.1
Novel_5_20250	MSTRG.15053.5;MSTRG.37891.7;MSTRG.15053.7
osa-miR2905	MSTRG.41582.8;MSTRG.41582.9;MSTRG.41582.1
Novel_1_630	MSTRG.14777.1
osa-miR1439	MSTRG.42469.1;MSTRG.37715.1;MSTRG.16647.1;MSTRG.37632.11;MSTRG.19701.14;MSTRG.16945.3;MSTRG.22292.1;MSTRG.37632.4;MSTRG.37632.2;MSTRG.13463.5;MSTRG.28731.2;MSTRG.37632.15;MSTRG.24793.9;MSTRG.37632.3;MSTRG.37632.1;MSTRG.37928.1;MSTRG.37632.10;MSTRG.20575.1;MSTRG.28731.1;MSTRG.13080.1;MSTRG.2310.1;MSTRG.31016.1;MSTRG.44650.12;MSTRG.32050.2;MSTRG.14380.1;MSTRG.9714.4;MSTRG.35235.1;MSTRG.17778.1;MSTR…
Novel_9_37861	MSTRG.44240.1;MSTRG.30416.1;MSTRG.10106.1;MSTRG.40196.1
Novel_6_24118	MSTRG.40658.1;MSTRG.40657.1;MSTRG.42118.1
Novel_3_13555	MSTRG.42009.1
osa-miR818b	MSTRG.4974.5;MSTRG.11969.1;MSTRG.2701.1;MSTRG.18138.2;MSTRG.7398.1;MSTRG.28731.2;MSTRG.18138.4;MSTRG.29433.1;MSTRG.35372.1;MSTRG.36015.1;MSTRG.13425.1;MSTRG.24460.7;MSTRG.37715.1;MSTRG.32391.1;MSTRG.4623.1;MSTRG.6629.1;MSTRG.39751.1;MSTRG.3412.1;MSTRG.18138.1;MSTRG.30385.1;MSTRG.18138.3;MSTRG.18138.5;MSTRG.18168.1;MSTRG.28731.1
osa-miR5144-5p	MSTRG.11170.1
osa-miR814b	MSTRG.22188.3
Novel_6_24504	MSTRG.5637.1;MSTRG.26074.1;MSTRG.5637.2
osa-miR11340-3p	MSTRG.6112.2;MSTRG.14775.1;MSTRG.6112.1
Novel_9_38066	MSTRG.44467.1;MSTRG.2664.1;MSTRG.5637.1;MSTRG.42500.4;MSTRG.5637.2
osa-miR2118o	MSTRG.13911.1
Novel_6_25762	MSTRG.5637.1;MSTRG.26074.1;MSTRG.5637.2
Novel_1_937	MSTRG.17862.1
osa-miR1863a	MSTRG.3147.1
osa-miR6255	MSTRG.17861.1;MSTRG.20064.1
Novel_5_23295	MSTRG.27289.1;MSTRG.8898.4;MSTRG.8898.3;MSTRG.8898.9
Novel_3_12104	MSTRG.25688.1
Novel_12_48298	MSTRG.2139.1;MSTRG.32391.1;MSTRG.5020.1;MSTRG.36897.2
Novel_4_17611	MSTRG.2092.1
Novel_4_18457	MSTRG.2338.1
osa-miR1849	MSTRG.31016.1;MSTRG.2182.4
Novel_11_43138	MSTRG.35044.1
Novel_4_16319	MSTRG.43423.1
Novel_11_43509	MSTRG.21652.1
Novel_3_15851	MSTRG.20159.1;MSTRG.23948.1
Novel_2_8653	MSTRG.8898.4;MSTRG.27289.1;MSTRG.8898.9;MSTRG.8898.3
osa-miR162b	MSTRG.17132.5;MSTRG.17132.4
Novel_2_7264	MSTRG.35044.1
osa-miR1846d-3p	MSTRG.29359.1
osa-miR6248	MSTRG.28609.4;MSTRG.13425.1;MSTRG.23319.1;MSTRG.16632.1;MSTRG.38522.1;MSTRG.43428.1;MSTRG.16850.1;MSTRG.42500.4;MSTRG.9575.1;MSTRG.44467.1;MSTRG.16827.10;MSTRG.28609.2;MSTRG.1435.4;MSTRG.31016.1;MSTRG.27557.1;MSTRG.28739.1;MSTRG.28609.3;MSTRG.44620.1;MSTRG.3412.1;MSTRG.4471.1;MSTRG.15956.1;MSTRG.22663.6;MSTRG.28609.1
osa-miR156j-3p	MSTRG.22381.1
osa-miR818c	MSTRG.4623.1;MSTRG.32391.1;MSTRG.37715.1;MSTRG.24460.7;MSTRG.13425.1;MSTRG.36015.1;MSTRG.35372.1;MSTRG.29433.1;MSTRG.28731.2;MSTRG.18138.4;MSTRG.2701.1;MSTRG.18138.2;MSTRG.7398.1;MSTRG.11969.1;MSTRG.4974.5;MSTRG.28731.1;MSTRG.18138.3;MSTRG.18138.5;MSTRG.18168.1;MSTRG.30385.1;MSTRG.18138.1;MSTRG.3412.1;MSTRG.39751.1;MSTRG.6629.1
Novel_12_47279	MSTRG.28894.1;MSTRG.34237.2;MSTRG.15053.7;MSTRG.15053.5;MSTRG.37891.7
Novel_9_38286	MSTRG.1947.1;MSTRG.1947.2;MSTRG.2310.1;MSTRG.30683.1;MSTRG.18704.1
Novel_1_3044	MSTRG.36781.1
osa-miR812e	MSTRG.22663.6;MSTRG.12888.1;MSTRG.16893.1;MSTRG.2664.1;MSTRG.42549.1;MSTRG.16632.1;MSTRG.5637.1;MSTRG.5637.2;MSTRG.42500.4;MSTRG.26074.1
osa-miR2120	MSTRG.37142.1;MSTRG.10222.1;MSTRG.16857.1;MSTRG.40056.1;MSTRG.6076.1;MSTRG.6664.1;MSTRG.9862.1
Novel_11_44748	MSTRG.5637.1;MSTRG.5637.2;MSTRG.26074.1
Novel_5_22165	MSTRG.21652.1
Novel_1_4628	MSTRG.5758.1;MSTRG.7719.1
Novel_3_11545	MSTRG.23493.1;MSTRG.40196.1;MSTRG.17830.1;MSTRG.10873.1;MSTRG.26101.1
osa-miR5539a	MSTRG.6849.4
osa-miR2877	MSTRG.17911.1
Novel_11_41895	MSTRG.36897.2;MSTRG.2694.1
osa-miR167a-5p	MSTRG.14943.1
osa-miR1320-3p	MSTRG.16279.2;MSTRG.43157.2;MSTRG.1292.5;MSTRG.26083.1;MSTRG.10479.20
Novel_5_22201	MSTRG.23948.1;MSTRG.20159.1
osa-miR2871b-3p	MSTRG.1826.1;MSTRG.30260.1
osa-miR528-5p	MSTRG.40056.1
osa-miR5490	MSTRG.25274.1;MSTRG.33473.1
osa-miR812q	MSTRG.22663.6
osa-miR171c-5p	MSTRG.22110.2;MSTRG.23160.2;MSTRG.23160.1;MSTRG.22110.3;MSTRG.27298.1
Novel_3_13868	MSTRG.26074.1;MSTRG.5637.2;MSTRG.42500.4;MSTRG.5637.1;MSTRG.10535.1;MSTRG.2664.1;MSTRG.44467.1
Novel_8_32952	MSTRG.23948.1;MSTRG.20159.1
osa-miR171g	MSTRG.28894.1
osa-miR1862c	MSTRG.36897.2;MSTRG.21286.1;MSTRG.41603.1
osa-miR159f	MSTRG.40973.2;MSTRG.22805.8;MSTRG.32391.1;MSTRG.39128.1;MSTRG.22805.9
osa-miR5143b	MSTRG.29273.1
osa-miR1850.2	MSTRG.15613.1;MSTRG.36081.1
osa-miR5152-3p	MSTRG.32103.4
osa-miR5513	MSTRG.30317.1;MSTRG.38432.1;MSTRG.19759.5;MSTRG.19759.2;MSTRG.19759.4
osa-miR156c-3p	MSTRG.26453.6;MSTRG.42096.1;MSTRG.26453.2;MSTRG.26453.4;MSTRG.26453.3;MSTRG.26453.5;MSTRG.26453.1
osa-miR1319a	MSTRG.6278.1
Novel_8_33937	MSTRG.21652.1
Novel_6_27868	MSTRG.17830.1;MSTRG.35624.1;MSTRG.18611.1;MSTRG.18649.1;MSTRG.24462.1;MSTRG.28047.1;MSTRG.2798.1;MSTRG.36511.16;MSTRG.25756.1;MSTRG.19135.4;MSTRG.36511.15;MSTRG.10758.1
osa-miR11342-5p	MSTRG.34268.1;MSTRG.12756.1;MSTRG.36015.1;MSTRG.1866.1
osa-miR1432-5p	MSTRG.44240.4;MSTRG.44240.21;MSTRG.38486.1;MSTRG.44240.19;MSTRG.25210.1;MSTRG.44240.17;MSTRG.10298.1;MSTRG.37863.1
osa-miR812j	MSTRG.35736.1;MSTRG.26074.1;MSTRG.42500.4;MSTRG.12888.1;MSTRG.2664.1;MSTRG.16893.1;MSTRG.42549.1;MSTRG.16632.1
osa-miR5526	MSTRG.2703.1
Novel_8_33101	MSTRG.20011.2;MSTRG.22663.6;MSTRG.42098.1;MSTRG.6932.1
Novel_6_27323	MSTRG.15053.7;MSTRG.15053.5
Novel_8_35283	MSTRG.5336.2
osa-miR2118d	MSTRG.13911.1
osa-miR11342-3p	MSTRG.1865.1;MSTRG.1221.1;MSTRG.9013.1
osa-miR812m	MSTRG.16893.1;MSTRG.12888.1;MSTRG.42500.4;MSTRG.26074.1;MSTRG.16632.1
Novel_4_19986	MSTRG.32391.1
Novel_9_37481	MSTRG.37431.1;MSTRG.40056.1;MSTRG.42729.1;MSTRG.12871.1
Novel_10_40779	MSTRG.22200.7;MSTRG.1581.1;MSTRG.34253.3;MSTRG.34804.2;MSTRG.34804.1;MSTRG.34253.1;MSTRG.28641.1;MSTRG.4974.5;MSTRG.34253.2;MSTRG.34804.3;MSTRG.38521.1;MSTRG.39422.6;MSTRG.16513.1
Novel_7_29516	MSTRG.2338.1
osa-miR815c	MSTRG.17180.9;MSTRG.44299.1;MSTRG.35818.9;MSTRG.17180.6
Novel_3_14271	MSTRG.19860.1
osa-miR6245b-3p	MSTRG.13287.1
Novel_9_36431	MSTRG.10986.1;MSTRG.5273.1
Novel_2_7059	MSTRG.4974.5;MSTRG.11969.1;MSTRG.4623.1;MSTRG.30385.1
osa-miR11341-3p	MSTRG.1221.1
osa-miR164d	MSTRG.1791.1
osa-miR11338-5p	MSTRG.12756.1;MSTRG.1866.1
osa-miR5508	MSTRG.41166.1;MSTRG.23574.1;MSTRG.10365.1
Novel_6_27353	MSTRG.26747.1
osa-miR818d	MSTRG.18138.1;MSTRG.30385.1;MSTRG.18168.1;MSTRG.18138.3;MSTRG.18138.5;MSTRG.6629.1;MSTRG.39751.1;MSTRG.3412.1;MSTRG.28731.1;MSTRG.28731.2;MSTRG.18138.4;MSTRG.29433.1;MSTRG.35372.1;MSTRG.4974.5;MSTRG.11969.1;MSTRG.7398.1;MSTRG.18138.2;MSTRG.2701.1;MSTRG.37715.1;MSTRG.4623.1;MSTRG.32391.1;MSTRG.36015.1;MSTRG.13425.1;MSTRG.24460.7
osa-miR818e	MSTRG.7398.1;MSTRG.18138.2;MSTRG.2701.1;MSTRG.4974.5;MSTRG.11969.1;MSTRG.29433.1;MSTRG.35372.1;MSTRG.28731.2;MSTRG.18138.4;MSTRG.24460.7;MSTRG.36015.1;MSTRG.13425.1;MSTRG.32391.1;MSTRG.4623.1;MSTRG.37715.1;MSTRG.39751.1;MSTRG.3412.1;MSTRG.6629.1;MSTRG.18138.5;MSTRG.18138.3;MSTRG.18168.1;MSTRG.18138.1;MSTRG.30385.1;MSTRG.28731.1
osa-miR2930	MSTRG.17537.1;MSTRG.23319.1;MSTRG.12820.1;MSTRG.3480.5;MSTRG.10535.1
osa-miR166e-5p	MSTRG.12254.1
osa-miR1857-5p	MSTRG.2779.1;MSTRG.9464.1;MSTRG.36337.1;MSTRG.35369.1;MSTRG.37655.2;MSTRG.40469.1;MSTRG.37366.1
osa-miR2121a	MSTRG.4230.1;MSTRG.14907.4;MSTRG.34034.1;MSTRG.34034.2;MSTRG.14907.2
osa-miR1858b	MSTRG.25225.1;MSTRG.35504.1;MSTRG.16015.1;MSTRG.12888.1;MSTRG.13506.1;MSTRG.5637.1;MSTRG.25648.1;MSTRG.12756.1;MSTRG.5637.2;MSTRG.4938.1
osa-miR395c	MSTRG.37527.1
Novel_11_44472	MSTRG.42730.1
Novel_3_11957	MSTRG.3706.1
Novel_8_33571	MSTRG.41583.13
Novel_5_21442	MSTRG.10106.1;MSTRG.44240.1;MSTRG.30416.1
Novel_10_40659	MSTRG.5637.1;MSTRG.5637.2;MSTRG.26074.1
Novel_2_7228	MSTRG.21652.1
osa-miR156g-5p	MSTRG.23319.1
Novel_8_34220	MSTRG.43423.1
osa-miR11336-5p	MSTRG.14777.1;MSTRG.1292.5;MSTRG.1292.4;MSTRG.34804.3;MSTRG.10253.6;MSTRG.7921.1;MSTRG.34804.1;MSTRG.34804.2
Novel_1_2402	MSTRG.14982.1;MSTRG.2139.1;MSTRG.7289.2;MSTRG.13425.1;MSTRG.3480.5;MSTRG.38498.1;MSTRG.10873.1
osa-miR172a	MSTRG.20162.5;MSTRG.15789.1;MSTRG.18860.1
osa-miR812h	MSTRG.42500.4;MSTRG.26074.1;MSTRG.35736.1;MSTRG.16632.1;MSTRG.42549.1;MSTRG.16893.1;MSTRG.2664.1;MSTRG.12888.1
Novel_2_7762	MSTRG.35616.1;MSTRG.2310.1;MSTRG.30683.1;MSTRG.18704.1
osa-miR1437a	MSTRG.3190.3
Novel_1_574	MSTRG.22663.6;MSTRG.1292.4;MSTRG.37830.1;MSTRG.34804.3;MSTRG.37830.3;MSTRG.29958.5;MSTRG.42754.2;MSTRG.31069.1;MSTRG.2046.4;MSTRG.7958.1;MSTRG.14777.1;MSTRG.1292.5;MSTRG.22372.1;MSTRG.42470.1;MSTRG.16632.1;MSTRG.24793.9;MSTRG.1581.1;MSTRG.2046.3;MSTRG.34804.1;MSTRG.34804.2;MSTRG.10479.20;MSTRG.16647.1
osa-miR1320-5p	MSTRG.36622.1;MSTRG.28823.1;MSTRG.22663.6;MSTRG.18092.1;MSTRG.18092.2;MSTRG.14777.1
osa-miR156f-5p	MSTRG.23319.1
osa-miR6250	MSTRG.34126.1;MSTRG.34126.2
osa-miR11339-3p	MSTRG.32050.2;MSTRG.19663.9;MSTRG.37830.3;MSTRG.18092.1;MSTRG.37830.1;MSTRG.41404.1;MSTRG.7958.1;MSTRG.16632.1;MSTRG.14777.1;MSTRG.18092.2;MSTRG.16647.1;MSTRG.10479.20;MSTRG.40196.1;MSTRG.12363.1;MSTRG.5020.1;MSTRG.7228.1
Novel_6_28003	MSTRG.34253.2;MSTRG.4974.5;MSTRG.6295.1;MSTRG.34253.1;MSTRG.16513.1;MSTRG.39422.6;MSTRG.34804.3;MSTRG.34253.3;MSTRG.13440.1;MSTRG.34804.1;MSTRG.34804.2
Novel_11_44112	MSTRG.5637.2;MSTRG.5637.1
Novel_11_41924	MSTRG.14982.1;MSTRG.2139.1;MSTRG.32391.1;MSTRG.36015.1;MSTRG.13425.1;MSTRG.6629.1;MSTRG.3480.5
Novel_1_2061	MSTRG.37891.7
Novel_5_23177	MSTRG.1947.1;MSTRG.35616.1;MSTRG.17830.1;MSTRG.26101.1;MSTRG.1947.2;MSTRG.30683.1;MSTRG.18704.1;MSTRG.2310.1;MSTRG.40196.1;MSTRG.23493.1
Novel_6_28101	MSTRG.24793.9;MSTRG.30416.1;MSTRG.10106.1
Novel_6_24606	MSTRG.8282.1;MSTRG.2310.1;MSTRG.30683.1;MSTRG.18704.1;MSTRG.1947.2;MSTRG.1947.1
Novel_8_33898	MSTRG.14099.1
Novel_4_19105	MSTRG.30416.1;MSTRG.44240.1;MSTRG.10106.1
osa-miR2118p	MSTRG.13911.1
osa-miR171a	MSTRG.22110.3;MSTRG.23160.1;MSTRG.23160.2;MSTRG.22110.2
Novel_2_10762	MSTRG.12363.1;MSTRG.7228.1;MSTRG.2046.4;MSTRG.2046.3;MSTRG.7958.1;MSTRG.16647.1;MSTRG.10479.20;MSTRG.4974.5;MSTRG.44578.1;MSTRG.37830.1;MSTRG.32050.2;MSTRG.44578.2;MSTRG.42470.1;MSTRG.16632.1;MSTRG.37830.3
Novel_5_22006	MSTRG.36335.1
osa-miR156a	MSTRG.23319.1
Novel_12_47723	MSTRG.22188.3
Novel_1_1802	MSTRG.18704.1;MSTRG.30683.1;MSTRG.2310.1;MSTRG.35616.1
Novel_12_47077	MSTRG.2338.1
Novel_11_42432	MSTRG.21652.1
osa-miR390-3p	MSTRG.32263.1;MSTRG.32222.3
osa-miR164a	MSTRG.10925.8;MSTRG.29052.1
osa-miR1879	MSTRG.19402.1
osa-miR156c-5p	MSTRG.23319.1
Novel_5_20816	MSTRG.35044.1
osa-miR395o	MSTRG.37527.1
osa-miR1876	MSTRG.16562.1;MSTRG.12206.4
Novel_7_31587	MSTRG.8898.3;MSTRG.8898.9;MSTRG.27289.1;MSTRG.8898.4
osa-miR167g	MSTRG.14943.1
Novel_3_13001	MSTRG.14777.1;MSTRG.4599.1
osa-miR2055	MSTRG.28850.4
osa-miR396a-3p	MSTRG.41245.3;MSTRG.28108.8;MSTRG.19402.1
Novel_3_13617	MSTRG.10106.1;MSTRG.44240.1;MSTRG.30416.1
osa-miR396c-3p	MSTRG.10925.8;MSTRG.12888.1;MSTRG.30317.1
osa-miR812n-5p	MSTRG.388.1;MSTRG.26182.1
osa-miR1862a	MSTRG.21286.1;MSTRG.41603.1;MSTRG.36897.2
Novel_4_16641	MSTRG.4333.1
osa-miR535-5p	MSTRG.10260.1;MSTRG.10260.4;MSTRG.10260.5;MSTRG.10260.3
osa-miR172d-5p	MSTRG.35235.1;MSTRG.35235.2;MSTRG.39004.1;MSTRG.17101.1
Novel_12_46466	MSTRG.15467.3
osa-miR166i-5p	MSTRG.4814.1;MSTRG.22110.3;MSTRG.22110.2
Novel_4_17146	MSTRG.30416.1;MSTRG.44240.1;MSTRG.10106.1
Novel_7_29986	MSTRG.5637.2;MSTRG.26074.1;MSTRG.5637.1
Novel_6_27794	MSTRG.389.1;MSTRG.22663.6;MSTRG.16632.1;MSTRG.44467.1;MSTRG.5637.1;MSTRG.42500.4;MSTRG.5637.2;MSTRG.26074.1
Novel_10_40408	MSTRG.38272.1
Novel_5_23330	MSTRG.2694.1;MSTRG.36897.2
Novel_10_40865	MSTRG.8898.4;MSTRG.27289.1;MSTRG.8898.9;MSTRG.8898.3
osa-miR160d-5p	MSTRG.35555.1;MSTRG.36083.2
osa-miR812f	MSTRG.42549.1;MSTRG.42500.4;MSTRG.26074.1;MSTRG.16632.1;MSTRG.12888.1;MSTRG.2664.1;MSTRG.16893.1
Novel_7_30562	MSTRG.30321.1;MSTRG.2468.1;MSTRG.40155.1
Novel_8_33452	MSTRG.34804.2;MSTRG.7958.1;MSTRG.34804.1;MSTRG.42754.2;MSTRG.34804.3;MSTRG.7921.1;MSTRG.14777.1;MSTRG.1292.5;MSTRG.1292.4;MSTRG.3412.1
osa-miR2873b	MSTRG.44136.6;MSTRG.10548.1
Novel_8_34383	MSTRG.21652.1
osa-miR435	MSTRG.32038.4;MSTRG.26785.1;MSTRG.19491.1;MSTRG.19383.2;MSTRG.18348.1
Novel_12_45644	MSTRG.19860.1
osa-miR397b	MSTRG.38995.1
Novel_12_45912	MSTRG.20159.1;MSTRG.23948.1
osa-miR2864.2	MSTRG.40084.4;MSTRG.11790.20;MSTRG.29473.1;MSTRG.29473.5;MSTRG.23591.1;MSTRG.29473.6
osa-miR5504	MSTRG.17082.1
Novel_3_12370	MSTRG.41583.13;MSTRG.15053.7;MSTRG.31398.1;MSTRG.15053.5;MSTRG.5299.3
Novel_7_29037	MSTRG.31622.1;MSTRG.34126.2;MSTRG.10873.1;MSTRG.26101.1;MSTRG.19555.1;MSTRG.30683.1;MSTRG.34161.1;MSTRG.19582.1;MSTRG.16210.1;MSTRG.40196.1;MSTRG.23493.1;MSTRG.417.6;MSTRG.34126.1;MSTRG.28698.1;MSTRG.670.1;MSTRG.26768.2;MSTRG.17830.1
osa-miR159c	MSTRG.17623.2
Novel_8_34401	MSTRG.27289.1;MSTRG.8898.4;MSTRG.8898.3;MSTRG.8898.9
Novel_7_29208	MSTRG.5336.2
osa-miR812a	MSTRG.2664.1;MSTRG.16893.1;MSTRG.12888.1;MSTRG.22663.6;MSTRG.16632.1;MSTRG.42549.1;MSTRG.5637.1;MSTRG.5637.2;MSTRG.26074.1;MSTRG.42500.4
osa-miR5799	MSTRG.5637.2;MSTRG.5637.1;MSTRG.35736.1
osa-miR5826	MSTRG.44965.1
osa-miR2873a	MSTRG.2378.3
osa-miR2094-3p	MSTRG.4839.1
osa-miR171i-3p	MSTRG.22110.2;MSTRG.22110.3
osa-miR1862d	MSTRG.3678.1;MSTRG.2694.1;MSTRG.36897.2
Novel_6_24490	MSTRG.8898.4;MSTRG.27289.1;MSTRG.8898.9;MSTRG.8898.3
osa-miR396g	MSTRG.41715.1;MSTRG.34501.1
osa-miR2866	MSTRG.23574.1;MSTRG.16335.1;MSTRG.36320.2
osa-miR167c-5p	MSTRG.14943.1
osa-miR535-3p	MSTRG.10260.1;MSTRG.10260.3;MSTRG.10790.11;MSTRG.10260.5;MSTRG.10260.4
osa-miR1858a	MSTRG.13506.1;MSTRG.35504.1;MSTRG.25225.1;MSTRG.12888.1;MSTRG.16015.1;MSTRG.5637.2;MSTRG.12756.1;MSTRG.4938.1;MSTRG.25648.1;MSTRG.5637.1
osa-miR6249a	MSTRG.30869.1;MSTRG.36374.1
osa-miR3981-3p	MSTRG.6629.1
osa-miR1436	MSTRG.36015.1;MSTRG.16945.3;MSTRG.12363.1;MSTRG.24460.7;MSTRG.22292.1;MSTRG.14982.1;MSTRG.37715.1;MSTRG.16647.1;MSTRG.11969.1;MSTRG.13463.5;MSTRG.28731.2;MSTRG.24793.9;MSTRG.3678.1;MSTRG.31016.1;MSTRG.41404.1;MSTRG.28731.1;MSTRG.39751.1;MSTRG.35235.1;MSTRG.3412.1;MSTRG.44650.12;MSTRG.15081.1;MSTRG.26074.1;MSTRG.5637.2;MSTRG.4623.1;MSTRG.4974.5;MSTRG.7398.1;MSTRG.18092.2;MSTRG.14907.8;MSTRG.44650.…
Novel_4_15975	MSTRG.44467.1
Novel_Syng_TIGR_014_48449	MSTRG.2865.1;MSTRG.10298.1;MSTRG.43293.1;MSTRG.4230.1
Novel_3_13580	MSTRG.37891.7
osa-miR171c-3p	MSTRG.23160.2;MSTRG.23160.1;MSTRG.28732.3
osa-miR171h	MSTRG.27298.1
Novel_6_26700	MSTRG.30001.3
osa-miR11338-3p	MSTRG.1221.1
Novel_2_10516	MSTRG.23493.1;MSTRG.40196.1;MSTRG.17830.1;MSTRG.28698.1;MSTRG.26101.1
osa-miR5493	MSTRG.40056.1
Novel_5_23337	Os01g0111300
Novel_5_20510	Os09g0561600;Os09g0561500;Os10g0489650
osa-miR395c	Os01g0757400;Os03g0195500;Os01g0530300;Os03g0731500;Os10g0502600;Os05g0355133;Os06g0486000;Os02g0190300;Os11g0668100;Os02g0190000;Os03g0726900;Os03g0743900;Os11g0640600;Os03g0182400;Os12g0511300;Os07g0269450;Os03g0597400;Os04g0486900;Os03g0330000;Os04g0585400;Os03g0615300;Os05g0435800;Os10g0208500;Os03g0195300
Novel_3_13555	Os10g0523000;Os11g0427401;Os01g0198702
osa-miR815a	Os06g0717800;Os04g0128900;Os02g0652575;Os06g0274300;Os10g0457500;Os04g0588500;Os11g0592500;Os06g0717200;Os09g0247101;Os09g0514550;Os05g0547700;Os03g0110700;Os10g0203100;Os06g0142400;Os02g0699700;Os03g0586800;Os09g0255800;Os01g0533100;Os05g0123400;Os03g0717000;Os10g0390500;Os01g0609300;Os01g0818700;Os10g0381800;Os06g0315900;Os10g0161800;Os08g0542600;Os04g0221450;Os01g0258000;Os08g0107800;Os05g0362…
Novel_11_41522	Os02g0772000
Novel_9_36554	Os12g0478400
Novel_10_41156	Os04g0397800;Os04g0487000
Novel_4_18915	Os01g0569800;Os01g0645650;Os12g0443101;Os11g0286500;Os07g0272900
osa-miR1857-3p	Os01g0700200;Os11g0659500;Os02g0644700;Os06g0251000;Os06g0234200;Os01g0711400;Os04g0583700;Os06g0158900;Os11g0682300;Os06g0611900;Os03g0121800;Os08g0320200;Os10g0521900;Os11g0704550;Os10g0522000;Os01g0360333;Os05g0535100;Os10g0497800;Os02g0215700;Os10g0461100;Os10g0460900;Os05g0376200;Os06g0557700;Os12g0159500;Os07g0581300;Os05g0150600
osa-miR396c-5p	Os04g0609900;Os02g0710500;Os09g0531200;Os04g0354400;Os11g0303500;Os07g0294100;Os06g0727600;Os01g0686600;Os06g0474900;Os11g0680200;Os01g0510800;Os02g0535700;Os07g0631000;Os01g0180800;Os01g0830200;Os07g0179400;Os09g0468000;Os03g0639700;Os03g0299800;Os09g0421200;Os04g0373000;Os07g0599201;Os02g0288000;Os11g0162700;Os01g0725800;Os03g0188100;Os10g0151100;Os02g0812400;Os09g0324200;Os01g0835700;Os02g0776…
Novel_11_44327	Os01g0684900;Os07g0524100;Os02g0548900;Os11g0598200;Os01g0752800;Os02g0161500;Os11g0286500;Os06g0621500;Os04g0647900;Os01g0918200;Os06g0565000;Os11g0579300;Os01g0898400;Os02g0806900;Os02g0531200;Os07g0109500;Os01g0215750;Os07g0693900;Os08g0562700;Os09g0453700;Os11g0215400;Os11g0467632;Os01g0921100;Os06g0301300;Os10g0344800;Os04g0625350;Os07g0121200;Os04g0454600;Os04g0455401;Os03g0645100;Os04g0643…
osa-miR5340	Os09g0279600;Os11g0668700;Os02g0787700;Os06g0712550;Os04g0468000;Os06g0215200;Os09g0400400;Os05g0293500;Os01g0271500;Os05g0418901
Novel_11_44354	Os01g0247700;Os11g0213733
osa-miR5494	Os01g0937400;Os09g0361700;Os07g0644550;Os04g0491500;Os01g0605000;Os02g0715200;Os02g0820700;Os02g0137100;Os09g0477700
osa-miR167f	Os08g0120200;Os05g0108300;Os02g0708300;Os08g0246300;Os03g0161950;Os06g0334300;Os03g0674700;Os07g0293000;Os07g0522600;Os03g0211800;Os02g0742700;Os04g0671900;Os09g0327600;Os03g0831000;Os07g0161500;Os01g0972000;Os12g0613700;Os07g0207700;Os07g0195200;Os07g0481400;Os06g0677800;Os06g0129100;Os01g0192550;Os01g0971900;Os09g0567700;Os12g0169400;Os02g0211350;Os03g0789466;Os07g0681500;Os05g0143300;Os02g0164…
osa-miR528-5p	Os01g0583700;Os07g0639500;Os05g0354300;Os12g0490000;Os03g0292900;Os02g0794300;Os08g0467400;Os04g0689000;Os12g0235600;Os01g0828300;Os07g0693400;Os07g0681600;Os01g0126900;Os08g0124750;Os08g0125850;Os04g0688200;Os04g0290800;Os09g0512900;Os03g0207700;Os08g0125250;Os11g0167300;Os10g0469100;Os03g0807500;Os07g0160800;Os01g0843800;Os03g0409100;Os04g0524136;Os04g0688600;Os11g0472000;Os02g0652100;Os08g0125…
osa-miR395n	Os09g0567900;Os02g0190000;Os03g0743900;Os10g0115600;Os06g0486000;Os02g0190300;Os08g0367400;Os11g0668100;Os10g0502600;Os03g0731500;Os04g0367000;Os03g0195500;Os04g0650300;Os06g0556451;Os02g0272900;Os03g0195300;Os07g0590700;Os04g0585400;Os02g0620800;Os07g0496000;Os04g0665800;Os03g0330000;Os01g0346400
osa-miR5814	Os02g0578400;Os01g0289100;Os06g0651300
Novel_5_22674	Os03g0216766;Os05g0256500;Os08g0336700;Os08g0174900;Os11g0533500;Os09g0135800;Os01g0224166
Novel_1_3440	Os03g0672950;Os12g0512000;Os08g0525800;Os04g0690300;Os05g0454200;Os07g0227300;Os04g0574700;Os06g0493001;Os05g0410800;Os01g0716800;Os01g0872400;Os10g0490100;Os08g0514033;Os02g0168000;Os02g0106900;Os03g0845300;Os03g0370800;Os05g0348700;Os02g0108100;Os05g0342900;Os01g0804150;Os01g0665900;Os06g0626766;Os02g0223200;Os07g0654300;Os05g0442550;Os02g0551700;Os01g0383001;Os04g0528600;Os10g0379854;Os12g0571…
Novel_3_11689	Os10g0523000;Os01g0198702;Os01g0705000
Novel_7_28965	Os08g0176633;Os07g0663600;Os02g0190200;Os08g0253150;Os06g0633300;Os01g0543600;Os03g0395700;Os02g0237801;Os03g0111600;Os01g0315600;Os08g0525800;Os06g0237100;Os11g0544866;Os01g0819233;Os05g0571400;Os06g0557600;Os10g0370400;Os06g0474800;Os02g0195500;Os08g0377150;Os10g0475000;Os11g0161000;Os11g0557700;Os03g0829466;Os01g0366501;Os06g0657500;Os04g0525200;Os01g0515300;Os11g0119100;Os11g0614500;Os04g0402…
Novel_2_10147	Os12g0138800;Os06g0205250;Os06g0494701;Os10g0543500;Os01g0375100;Os10g0370400;Os06g0216966;Os11g0197725;Os01g0825900;Os06g0241100;Os06g0656500;Os06g0235200;Os05g0580600;Os09g0414600;Os03g0125650;Os07g0474700;Os01g0728000;Os03g0641500;Os02g0727966;Os06g0136201;Os05g0453700;Os04g0253601;Os02g0141201;Os11g0606001;Os10g0368902;Os02g0237801
osa-miR435	Os06g0281400;Os01g0613900;Os05g0429802;Os03g0305700;Os05g0163500;Os04g0500600;Os05g0373700;Os09g0402001;Os11g0208900;Os09g0265800;Os01g0548750;Os07g0179500;Os02g0721800;Os12g0493900;Os02g0156400;Os01g0692500;Os05g0238000;Os07g0608300;Os03g0690600;Os07g0604400;Os01g0772600;Os02g0671950;Os03g0737800;Os02g0153100;Os03g0139200;Os03g0226800;Os05g0317300;Os01g0787300
osa-miR5162	Os07g0692300;Os02g0580700;Os05g0253100
Novel_4_19181	Os01g0772600
osa-miR5801c-5p	Os06g0110200;Os12g0618300;Os03g0391100;Os01g0623600;Os09g0485600;Os08g0529000;Os08g0537200;Os12g0271600;Os04g0621900;Os09g0521500;Os06g0318600;Os04g0536500;Os10g0528900
osa-miR812s	Os06g0176100;Os03g0227400;Os12g0243050;Os05g0227901;Os01g0387865;Os09g0333600;Os06g0610350;Os10g0134250;Os01g0694500;Os07g0160100;Os08g0162066;Os06g0187050;Os02g0771600;Os06g0177200;Os12g0583801;Os02g0526650
Novel_5_22954	Os07g0444000;Os04g0502900;Os07g0206750
Novel_8_35275	Os08g0118300;Os04g0584500;Os08g0157800;Os11g0112300;Os10g0551100;Os01g0126200;Os04g0295200;Os05g0310800;Os02g0641300;Os03g0808200;Os08g0161100;Os06g0638000;Os05g0123100;Os03g0800400;Os09g0427300;Os09g0471150;Os06g0199400;Os04g0128700;Os07g0248100;Os05g0115100;Os03g0165350;Os12g0583801;Os02g0497500;Os06g0496601;Os01g0268000;Os07g0191625;Os01g0243200;Os05g0114950;Os08g0254300;Os06g0655500;Os02g0474…
Novel_7_29986	Os01g0274901;Os11g0586100;Os04g0558700;Os01g0608900;Os02g0771600;Os12g0138000;Os08g0235651;Os04g0413200;Os04g0294401
osa-miR156b-5p	Os08g0404200;Os02g0115650;Os01g0700100;Os01g0191300;Os06g0663500;Os02g0536400;Os10g0444400;Os04g0321500;Os05g0343800;Os02g0161500;Os06g0554800;Os08g0404300;Os07g0267200;Os01g0829800;Os03g0638300;Os02g0537450;Os01g0922600;Os06g0111600;Os05g0326400;Os01g0914000;Os06g0470075;Os04g0551500;Os06g0674000;Os09g0568200;Os12g0580900;Os07g0615900;Os11g0114600;Os10g0539650;Os09g0507100;Os07g0571100;Os06g0644…
osa-miR6250	Os09g0436400
Novel_7_31095	Os04g0576800;Os04g0684100;Os07g0493400;Os12g0104300;Os04g0284500;Os02g0795000
osa-miR162b	Os01g0909200;Os04g0649700;Os07g0182900;Os06g0192500;Os04g0105400;Os03g0302200;Os02g0820000;Os05g0580000;Os03g0100300;Os03g0127600;Os03g0798300;Os03g0121800;Os02g0317600;Os11g0580000;Os02g0602900;Os05g0269500
osa-miR171e-3p	Os09g0555600;Os02g0518400;Os02g0663100;Os01g0923900;Os03g0658800;Os05g0417100;Os04g0555000;Os08g0493900;Os05g0469600;Os12g0270300;Os02g0662700;Os03g0758950;Os06g0105350;Os09g0513900;Os05g0132300;Os08g0116900;Os10g0551200;Os12g0552800;Os03g0135550;Os09g0247101;Os03g0366350
osa-miR172d-5p	Os03g0719800;Os03g0700800;Os07g0588000;Os08g0320000;Os02g0778700;Os12g0160900;Os02g0746000;Os03g0848250;Os07g0236200;Os06g0101000;Os10g0508000;Os08g0130000;Os06g0109400;Os02g0582400;Os05g0168300;Os03g0309200;Os12g0228400;Os01g0719300;Os04g0280200;Os06g0166200;Os08g0150800;Os11g0213500;Os09g0573000;Os08g0542900;Os10g0559600;Os11g0686900;Os04g0440100;Os06g0258900;Os02g0122900;Os05g0390500;Os01g0913…
Novel_6_27186	Os03g0307700;Os01g0578000;Os10g0209300;Os10g0406400;Os05g0324600;Os04g0337201;Os03g0639200
osa-miR5485	Os06g0667400;Os12g0579000;Os12g0556600;Os06g0625800;Os02g0634900;Os03g0721200;Os05g0559400;Os09g0512000;Os03g0128100;Os10g0337500;Os03g0759500;Os07g0539900;Os10g0497700;Os01g0282251;Os03g0111500;Os07g0245100;Os04g0372201;Os01g0114402;Os02g0176100;Os01g0511100;Os04g0185100;Os01g0710800;Os07g0507300
osa-miR5143a	Os03g0138200;Os04g0465000;Os02g0756850
Novel_2_8653	Os05g0504800;Os11g0472000;Os11g0131800;Os02g0144300;Os01g0516600
osa-miR5145	Os02g0307300
osa-miR2055	Os02g0628200;Os11g0690466;Os05g0465250;Os05g0145900;Os12g0288600;Os07g0542232;Os11g0134900;Os01g0142950;Os07g0195400;Os09g0298700;Os02g0616300;Os01g0588550;Os05g0443400;Os03g0437200;Os04g0173300;Os08g0332800;Os09g0570500;Os10g0439800;Os05g0576800;Os03g0652100;Os02g0541150;Os04g0621900;Os01g0738600;Os01g0871200;Os04g0629300;Os06g0509100;Os03g0333300;Os01g0672300;Os05g0540100
osa-miR5805	Os05g0183900;Os05g0184901
Novel_11_41649	Os08g0486266;Os01g0715800;Os08g0367850;Os10g0406701
osa-miR164e	Os02g0515000;Os01g0200350;Os08g0250900;Os04g0429850;Os01g0880300;Os09g0509400;Os04g0414700;Os08g0525000;Os03g0111600;Os01g0565800;Os05g0589500;Os10g0169900;Os02g0436400;Os04g0625000;Os06g0675600;Os09g0549400;Os08g0434150;Os12g0577733;Os06g0575400;Os02g0154600;Os02g0630650;Os05g0426400;Os01g0719125;Os12g0588800;Os03g0590700;Os06g0527500;Os03g0644200;Os03g0260000;Os05g0339300;Os10g0426450;Os05g0270…
osa-miR812k	Os12g0243050;Os03g0227400;Os02g0176100;Os06g0610400;Os06g0176100;Os12g0138000;Os05g0227901;Os09g0333600;Os04g0413200;Os02g0771600;Os06g0187050;Os01g0274901;Os06g0177200;Os03g0268400;Os01g0882000;Os11g0199000;Os03g0439900;Os06g0715400
osa-miR812t	Os01g0274901;Os10g0498100;Os12g0243050;Os04g0638100;Os02g0176100
osa-miR5508	Os02g0179800;Os09g0528200;Os01g0360200;Os08g0387400;Os03g0829466;Os01g0235800;Os10g0522500;Os03g0211400;Os06g0308300;Os07g0118800;Os07g0269800;Os08g0460700;Os01g0667700;Os05g0439300;Os01g0890950;Os01g0154950;Os10g0105400;Os06g0129400;Os04g0580700;Os10g0427300;Os03g0774300
Novel_6_26278	Os03g0576600;Os02g0252600;Os01g0650000;Os06g0472600;Os01g0191400;Os07g0133700;Os01g0699950;Os05g0108450
Novel_10_39652	Os04g0682000;Os09g0299200;Os05g0557000;Os04g0254300;Os01g0205300;Os03g0748300;Os07g0457300;Os05g0444200
Novel_6_24606	Os03g0705550;Os06g0241100;Os06g0656500;Os06g0205250;Os12g0138800;Os08g0232700;Os06g0494701;Os02g0141201;Os05g0453700;Os02g0237801;Os11g0606001;Os09g0414600;Os07g0474700;Os03g0125650;Os02g0727966;Os08g0435900
Novel_6_25762	Os11g0586100;Os04g0558700;Os01g0274901;Os01g0608900;Os02g0771600;Os08g0235651;Os12g0138000;Os04g0294401;Os04g0413200
osa-miR156g-5p	Os02g0174100;Os06g0649800;Os10g0563900;Os01g0769000;Os10g0535900;Os07g0616850;Os06g0542350;Os05g0555600;Os04g0107650;Os03g0752300;Os12g0121600;Os02g0290000;Os12g0114100;Os01g0756700;Os03g0660000;Os07g0583500;Os11g0157600;Os09g0439800;Os05g0480700;Os02g0100300;Os02g0554100;Os04g0117900;Os06g0229800;Os05g0562200;Os01g0513950;Os12g0441600;Os02g0752300;Os01g0140100;Os07g0456700;Os03g0412300;Os07g0505…
Novel_1_3893	Os12g0443101
osa-miR395t	Os10g0502600;Os03g0731500;Os05g0355133;Os04g0650300;Os03g0195500;Os01g0757400;Os03g0743900;Os03g0726900;Os03g0330000;Os06g0625500;Os07g0496000;Os04g0665800;Os07g0269450;Os10g0208500;Os05g0435800;Os02g0272900;Os03g0195300;Os06g0556451;Os04g0585400;Os03g0300900
osa-miR818a	Os07g0144732;Os06g0262501;Os08g0387200;Os02g0282000;Os01g0908001;Os01g0296900;Os01g0228500;Os03g0306400;Os05g0532500;Os06g0593800;Os07g0218600;Os01g0202500;Os07g0596950;Os01g0264400;Os08g0522300;Os03g0683900;Os02g0728700;Os03g0651900;Os09g0401000;Os09g0411600;Os06g0167500;Os03g0227500;Os04g0474500;Os02g0712550;Os01g0170500;Os07g0595700;Os02g0188201;Os07g0616750;Os03g0259300;Os06g0601500;Os10g0406…
osa-miR812d	Os06g0140200;Os11g0586100;Os06g0177200;Os03g0268400;Os02g0526650;Os11g0550300;Os12g0243050;Os09g0109800;Os07g0151650;Os08g0434566;Os06g0610350;Os09g0333600;Os05g0227901;Os01g0387865;Os11g0475000;Os01g0694500;Os06g0578100;Os03g0714400;Os02g0771600;Os06g0187050;Os06g0681600;Os01g0274901;Os01g0608900;Os01g0882000;Os11g0199000;Os12g0583801;Os03g0439900;Os06g0715400;Os10g0160600;Os02g0176100;Os03g0227…
Novel_7_28548	Os06g0172675;Os01g0620400
Novel_2_8680	Os07g0553450
osa-miR166j-3p	Os01g0909600;Os07g0581366;Os04g0298501;Os03g0164901;Os12g0612700;Os09g0415050;Os07g0515200;Os03g0640800;Os04g0571600;Os10g0480200;Os02g0676400;Os02g0222000;Os12g0267900;Os03g0109400;Os03g0651201;Os02g0729300
osa-miR5154	Os03g0807000;Os06g0270950;Os01g0900200;Os08g0175700
osa-miR166i-3p	Os07g0152301;Os02g0462300;Os05g0417100;Os12g0612700;Os03g0241300;Os12g0548200;Os04g0691900;Os02g0729300;Os03g0109400;Os03g0651201;Os02g0676400;Os03g0640800;Os04g0571600;Os10g0480200;Os08g0192950;Os05g0489750;Os04g0551300
Novel_11_41654	Os01g0243800;Os01g0921100;Os10g0404500;Os10g0476900;Os07g0189800;Os08g0501700;Os05g0418901;Os08g0494400;Os12g0426750;Os03g0655000;Os03g0255200;Os09g0572400;Os06g0161300;Os02g0631801;Os05g0114950;Os10g0339182;Os11g0148400;Os08g0205650;Os03g0365250;Os10g0547200;Os10g0410900;Os03g0332201;Os04g0472200;Os07g0169100;Os08g0437050;Os04g0290450;Os01g0819233;Os03g0829466;Os08g0377150;Os03g0425300;Os12g0126…
Novel_8_34220	Os07g0662700
osa-miR2931	Os03g0279832;Os01g0648225;Os03g0295600;Os07g0484700;Os03g0183850;Os09g0116100;Os09g0482800;Os07g0432800;Os06g0346100;Os07g0214900;Os10g0467800;Os03g0710100;Os08g0564200;Os03g0107600;Os09g0428600;Os01g0750000;Os04g0566800;Os11g0116550;Os03g0340001;Os07g0271700;Os01g0749900;Os01g0588300;Os10g0180800;Os04g0434600;Os01g0650200;Os02g0699400;Os10g0406701;Os11g0170300;Os01g0579900;Os03g0210200;Os04g0527…
Novel_1_630	Os09g0101100;Os09g0283200;Os03g0785300
Novel_7_30566	Os08g0227900;Os01g0542100
osa-miR1862c	Os09g0366500;Os02g0179250;Os06g0574100;Os07g0629900;Os01g0715800;Os02g0617100;Os07g0562800;Os03g0649275;Os08g0421000;Os05g0215000;Os08g0498600;Os07g0466200;Os02g0589600;Os08g0486266
osa-miR5492	Os07g0471050;Os03g0421100;Os08g0563200;Os05g0111300;Os12g0596000;Os04g0524700;Os10g0478000;Os08g0510300;Os02g0652575;Os11g0640800;Os07g0283050;Os02g0208200;Os03g0137200;Os09g0424600;Os01g0654100;Os11g0467632;Os10g0183000;Os04g0517300;Os01g0547000;Os01g0558700;Os07g0404900;Os08g0208700;Os07g0235200;Os08g0110200;Os05g0100700;Os07g0535800;Os02g0622200;Os01g0914400;Os04g0171800;Os11g0687100;Os04g0484…
Novel_9_38066	Os06g0610350;Os07g0151650;Os04g0558700;Os12g0583801;Os11g0199000;Os02g0526650;Os03g0268400;Os07g0160100;Os03g0339900
osa-miR2118b	Os03g0113800;Os08g0539700;Os10g0161400;Os04g0375300;Os05g0414200;Os09g0497900;Os01g0308300;Os12g0511600;Os01g0786800;Os04g0435300;Os06g0619600;Os12g0543701;Os01g0798900;Os08g0479400;Os02g0572400;Os08g0265300;Os02g0543200;Os01g0149500;Os01g0149350
Novel_3_10959	Os07g0616100;Os01g0728900;Os12g0122400;Os07g0471050;Os09g0572700;Os02g0612700;Os09g0414600;Os03g0125650;Os01g0728000;Os03g0641500;Os02g0727966;Os06g0562600;Os08g0437050;Os02g0630650;Os05g0571400;Os06g0216966;Os11g0197725;Os01g0691000;Os01g0825900;Os01g0805975;Os06g0656500;Os06g0235200;Os05g0580600;Os12g0138800;Os06g0494701;Os10g0543500;Os08g0162066;Os10g0568300
Novel_11_44078	Os08g0215300;Os02g0745200;Os12g0150901;Os12g0480300;Os03g0347900
Novel_11_44629	Os07g0189800;Os12g0234000;Os03g0125650;Os05g0409800;Os04g0684100;Os01g0347000
Novel_2_6971	Os09g0482681;Os06g0574100;Os07g0508200;Os01g0116300;Os10g0420800;Os11g0199700
Novel_7_30546	Os03g0347900;Os12g0150901;Os02g0745200;Os12g0480300;Os08g0215300
Novel_9_37155	Os02g0641300;Os03g0808200;Os05g0310800;Os04g0295200;Os01g0126200;Os10g0551100;Os11g0112300;Os08g0157800;Os04g0584500;Os08g0118300;Os07g0191625;Os01g0243200;Os01g0268000;Os06g0496601;Os02g0497500;Os12g0583801;Os03g0165350;Os05g0115100;Os07g0248100;Os04g0128700;Os09g0471150;Os06g0199400;Os09g0427300;Os03g0800400;Os06g0638000;Os08g0161100;Os05g0123100;Os12g0188566;Os09g0484200;Os04g0658400;Os05g0590…
Novel_11_43585	Os08g0256750;Os10g0350200
osa-miR1849	Os10g0553800;Os12g0110475;Os02g0818700;Os01g0508000;Os01g0579000;Os01g0153250
osa-miR1862g	Os05g0143200;Os10g0542200;Os05g0579050;Os04g0613800;Os02g0649700;Os03g0726100;Os08g0388300;Os12g0614900;Os11g0151600;Os07g0508200;Os07g0649500;Os07g0642100;Os04g0389901;Os07g0649300;Os10g0571100;Os02g0644700;Os12g0209502;Os05g0215000;Os02g0244100;Os10g0559600;Os05g0378800;Os02g0767600;Os11g0247300;Os03g0818700;Os05g0488800;Os02g0589600;Os07g0648900;Os03g0418766;Os03g0861100;Os12g0244150;Os11g0159…
osa-miR395q	Os04g0585400;Os02g0620800;Os07g0590700;Os02g0272900;Os03g0195300;Os06g0556451;Os01g0346400;Os03g0330000;Os04g0665800;Os07g0496000;Os11g0668100;Os08g0367400;Os02g0190300;Os06g0486000;Os10g0115600;Os03g0743900;Os02g0190000;Os09g0567900;Os04g0650300;Os03g0195500;Os04g0367000;Os10g0502600;Os03g0731500
osa-miR5833	Os02g0329450;Os12g0274700;Os10g0514550;Os05g0122600;Os12g0112401;Os03g0318025;Os02g0305950;Os01g0937500;Os01g0317800;Os12g0141050;Os04g0435200;Os10g0167500;Os12g0188500;Os06g0114366;Os04g0218350;Os02g0593500;Os02g0504100;Os03g0664700;Os11g0506150;Os12g0197700;Os03g0715900;Os07g0559400;Os02g0789600;Os10g0464800;Os03g0125600;Os12g0291100;Os12g0168100;Os02g0657700;Os07g0247100;Os09g0279500;Os09g0419…
osa-miR171c-3p	Os09g0513900;Os06g0105350;Os03g0758950;Os02g0662700;Os05g0469600;Os12g0270300;Os04g0555000;Os08g0493900;Os09g0555600;Os02g0518400;Os03g0658800;Os05g0417100;Os02g0663100;Os01g0923900;Os09g0247101;Os03g0366350;Os03g0135550;Os12g0552800;Os08g0116900;Os05g0132300;Os10g0551200
osa-miR11342-5p	Os11g0240800;Os02g0803900;Os04g0509200;Os04g0580300;Os08g0224150;Os06g0136201;Os06g0674000;Os01g0681400;Os04g0468000;Os07g0615900;Os04g0309500;Os01g0622500;Os04g0250050
osa-miR3982-3p	Os11g0479100;Os08g0549200;Os01g0860300;Os02g0150900;Os09g0491740;Os12g0284000;Os07g0576550;Os04g0489800;Os08g0564400;Os04g0473900
Novel_Syng_TIGR_014_48449	Os01g0553600;Os04g0112533;Os08g0411800;Os09g0570400;Os03g0752000;Os10g0568800
Novel_4_18360	Os09g0485600;Os10g0528900
Novel_10_39368	Os03g0388300;Os08g0521000;Os06g0610300
osa-miR2120b-5p	Os04g0369000;Os09g0122300;Os01g0842500;Os11g0691050;Os02g0179250;Os08g0543400;Os09g0339601;Os07g0296000;Os06g0218500;Os11g0233201;Os02g0523650;Os09g0531650;Os05g0267100;Os11g0180800;Os06g0559600;Os02g0269000;Os06g0561501;Os03g0823100
osa-miR172d-3p	Os11g0128500;Os11g0431700;Os03g0784000;Os06g0700000;Os02g0809900;Os09g0452900;Os11g0653300;Os05g0121600;Os10g0506800;Os12g0123800;Os01g0580100;Os11g0282900;Os03g0297100;Os01g0703800;Os02g0123450;Os06g0639200;Os04g0636700;Os09g0386500;Os03g0680200;Os09g0339800;Os03g0818800;Os09g0125900;Os04g0662000;Os03g0401100;Os02g0803300;Os10g0151800;Os01g0916800;Os03g0427100;Os02g0525400;Os06g0124300;Os03g0297…
osa-miR166e-5p	Os04g0455900;Os08g0433100;Os06g0102700;Os03g0823100;Os01g0909300;Os04g0542200;Os03g0808600;Os05g0437900;Os05g0102800;Os03g0793550;Os02g0754500;Os01g0545500;Os01g0970700;Os01g0148700;Os04g0486800;Os10g0411500;Os08g0247600;Os04g0278550;Os03g0616300;Os03g0425300;Os04g0563050;Os01g0162200;Os12g0249900
osa-miR3979-5p	Os04g0510700;Os12g0612300;Os05g0456925;Os12g0224500;Os06g0597200;Os06g0119300;Os10g0578900;Os07g0507200;Os01g0960800;Os02g0591800;Os01g0841500;Os07g0271000;Os01g0750300;Os08g0405700;Os08g0105100;Os03g0624800;Os03g0234900;Os04g0620200;Os12g0181200;Os11g0283500;Os01g0168400;Os04g0687300;Os01g0924900;Os01g0533500;Os10g0337500;Os01g0887100;Os09g0316400;Os01g0234900;Os04g0600900;Os05g0405900;Os05g0114…
osa-miR814b	Os03g0668033;Os03g0856000;Os06g0594100;Os12g0583500;Os09g0551300;Os11g0649700;Os02g0705300;Os12g0583801;Os11g0167300;Os06g0718400;Os10g0406701;Os01g0116300
Novel_2_9080	Os06g0361500
osa-miR2118d	Os03g0691050;Os04g0375300;Os02g0256100;Os09g0471900;Os04g0323500;Os06g0288300;Os01g0384901;Os01g0786800;Os04g0435300;Os09g0334600;Os01g0798900
osa-miR1881	Os02g0815500;Os04g0555400
osa-miR7694-3p	Os10g0406701;Os07g0572800;Os02g0475500;Os08g0230500;Os07g0239600;Os03g0683900
Novel_2_6466	Os11g0585200;Os01g0952000
osa-miR2096-5p	Os03g0826200;Os10g0540050;Os03g0135700;Os02g0682500;Os11g0691050;Os07g0651800;Os03g0233300;Os07g0650600;Os07g0543500;Os05g0373500;Os07g0654700;Os07g0651600;Os05g0514300;Os07g0513000;Os09g0457900;Os03g0809400;Os01g0618300;Os07g0653050;Os09g0551000;Os03g0140500;Os12g0632800;Os01g0877450;Os03g0291700;Os09g0556500
osa-miR166h-5p	Os10g0479800;Os11g0691300;Os09g0518400;Os04g0563050;Os01g0925100;Os12g0226500;Os11g0691100;Os06g0671150;Os06g0114400;Os11g0691650;Os04g0297933;Os04g0486800;Os04g0685900;Os02g0763501;Os06g0163000;Os09g0471400;Os01g0852100;Os10g0548700;Os05g0102800;Os10g0152000;Os02g0284300
Novel_5_20446	Os06g0172675;Os01g0620400
osa-miR169r-3p	Os01g0749300;Os04g0652550;Os04g0674900;Os03g0837700;Os04g0396800;Os03g0346900;Os06g0569500;Os01g0934600;Os07g0461500;Os03g0663750;Os09g0323000;Os12g0115950;Os11g0116500;Os01g0239700;Os06g0264200;Os08g0320400;Os01g0686300
osa-miR171i-5p	Os04g0555151;Os01g0794800;Os02g0663200;Os06g0105300;Os06g0494250;Os10g0358700;Os01g0795000;Os05g0569300;Os03g0135550;Os10g0414800;Os10g0551401;Os02g0662900
osa-miR166f	Os04g0298501;Os01g0909600;Os07g0581366;Os12g0612700;Os03g0164901;Os07g0515200;Os09g0415050;Os02g0222000;Os02g0676400;Os12g0267900;Os03g0640800;Os04g0571600;Os10g0480200;Os03g0109400;Os03g0651201;Os02g0729300
Novel_2_8689	Os05g0185700
osa-miR171h	Os03g0135550;Os03g0263300;Os02g0241600;Os03g0184500;Os02g0104800;Os06g0188700;Os01g0704700;Os03g0302800;Os03g0419100;Os09g0553200;Os03g0667400;Os05g0295900
osa-miR1440b	Os02g0290000;Os02g0553000;Os09g0103500;Os03g0781700;Os05g0207350;Os04g0356600;Os07g0109700;Os12g0115700;Os03g0130900;Os10g0205200;Os03g0796600;Os11g0428500;Os03g0650900;Os06g0679750
Novel_4_18040	CAA33973
Novel_1_2177	Os05g0508400
Novel_1_5244	Os07g0662700
Novel_11_42640	Os09g0515100;Os09g0442700;Os04g0455600;Os02g0595300;Os07g0668800;Os01g0290100;Os08g0276200;Os08g0245400;Os08g0506000;Os03g0794000;Os02g0789150;Os12g0563500
osa-miR159f	Os01g0153900;Os09g0384601;Os11g0117700;Os05g0490600;Os03g0331700;Os03g0796400;Os09g0538700;Os01g0812000;Os03g0800200;Os06g0605600;Os01g0561500;Os12g0210400;Os06g0355500;Os08g0512801;Os01g0680900;Os01g0507000;Os01g0665200;Os03g0578900;Os11g0597400;Os02g0671950;Os05g0566700;Os03g0789466;Os08g0332150;Os07g0227750;Os03g0683866;Os05g0501800;Os11g0569600
osa-miR171g	Os01g0651932;Os12g0614201;Os01g0879400;Os03g0135550;Os02g0184300;Os11g0572301;Os04g0254300;Os11g0533600;Os07g0100200;Os01g0620100
osa-miR171b	Os10g0551200;Os08g0116900;Os05g0132300;Os12g0552800;Os03g0135550;Os03g0366350;Os09g0247101;Os03g0658800;Os05g0417100;Os01g0923900;Os02g0663100;Os02g0518400;Os09g0555600;Os08g0493900;Os04g0555000;Os05g0469600;Os02g0662700;Os12g0270300;Os06g0105350;Os09g0513900;Os03g0758950
Novel_5_20532	Os11g0153200
Novel_2_9057	Os02g0179250;Os03g0255200;Os04g0651500;Os09g0572400;Os06g0152700;Os07g0169100;Os02g0152200;Os10g0476900;Os08g0494400;Os01g0667100;Os12g0292200
Novel_12_47699	Os06g0136201
Novel_8_32983	Os08g0430050;Os08g0256750;Os04g0468000;Os07g0296000;Os06g0503900;Os01g0587400;Os07g0592000
Novel_8_33749	Os07g0533600;Os06g0324300;Os06g0149133;Os02g0555900;Os03g0807000;Os05g0487600;Os05g0512100;Os03g0746700;Os04g0470100;Os05g0126800;Os01g0111300;Os02g0673100;Os04g0509400;Os05g0169300;Os02g0586400
Novel_7_29516	Os07g0493400;Os04g0684100;Os04g0576800;Os12g0104300;Os04g0284500;Os02g0795000
Novel_4_19716	Os06g0474800
osa-miR156h-3p	Os05g0149600;Os03g0365200;Os09g0516700;Os01g0142500;Os08g0491200;Os01g0121950;Os06g0115600;Os09g0564200;Os09g0420900;Os08g0105000;Os05g0316200;Os05g0586050;Os06g0104300;Os03g0860050;Os08g0375900;Os02g0272600;Os11g0592550
Novel_4_17611	Os11g0306100
osa-miR2092-3p	Os08g0467400;Os07g0456900;Os10g0330600;Os06g0628500;Os07g0147600;Os02g0570400;Os11g0218000;Os01g0919400;Os01g0580200
Novel_9_36431	Os02g0503700;Os06g0503900;Os03g0289100;Os04g0618050;Os03g0288800;Os03g0119500;Os11g0599100;Os11g0199700;Os02g0462000;Os03g0131500;Os01g0523100;Os08g0493900;Os11g0496500;Os01g0753100;Os12g0618800;Os07g0259450;Os05g0163050;Os08g0484600;Os01g0351100;Os04g0226600;Os09g0310800;Os06g0220200;Os12g0561000;Os07g0296000;Os12g0158800;Os02g0699000;Os06g0234100;Os07g0613600;Os12g0109300;Os09g0521500;Os12g0279…
osa-miR812b	Os12g0243050;Os09g0109800;Os08g0434566;Os06g0610350;Os07g0151650;Os01g0387865;Os09g0333600;Os05g0227901;Os11g0475000;Os01g0694500;Os06g0578100;Os03g0714400;Os06g0140200;Os11g0586100;Os06g0177200;Os03g0268400;Os02g0526650;Os11g0550300;Os10g0160600;Os03g0227400;Os02g0176100;Os06g0176100;Os12g0138000;Os12g0126600;Os10g0134250;Os12g0545600;Os04g0413200;Os06g0673300;Os03g0339900;Os02g0771600;Os06g0187…
osa-miR171c-5p	Os04g0555151;Os02g0663200;Os02g0288400;Os06g0105300;Os10g0358700;Os04g0501700;Os12g0625000;Os03g0666100;Os03g0135550;Os10g0551401;Os02g0662900;Os11g0181700
Novel_12_47241	Os05g0504800;Os11g0472000;Os11g0131800;Os02g0144300;Os01g0516600
Novel_4_16319	Os07g0662700
Novel_12_45644	Os07g0189800;Os12g0234000;Os03g0125650;Os05g0409800;Os04g0684100;Os01g0347000
Novel_6_24531	Os04g0382700;Os01g0966100;Os03g0281600;Os09g0301800;Os09g0518200;Os01g0200350;Os02g0741000;Os02g0117400;Os01g0732700;Os03g0396200;Os08g0554699
Novel_9_36419	Os07g0662700
osa-miR171d-5p	Os03g0297900;Os03g0135550;Os10g0482000;Os02g0498100;Os04g0555151
osa-miR6253	Os02g0822050;Os12g0118700;Os02g0721901;Os05g0146100;Os11g0687001;Os12g0502800;Os07g0249600;Os03g0708750;Os03g0698900;Os07g0586550;Os01g0269900;Os04g0449700
Novel_8_34946	Os06g0271900;Os05g0418901;Os09g0400400
Novel_11_43659	Os02g0671950;Os01g0645650;Os12g0443101;Os01g0542100;Os08g0437050;Os07g0272900
osa-miR1846c-3p	Os06g0296450;Os06g0656500;Os07g0637600;Os05g0161500;Os08g0471800;Os02g0217400;Os07g0103100;Os09g0276000;Os06g0288100;Os01g0618300;Os07g0498900;Os04g0678700;Os01g0565600;Os05g0244600;Os04g0284100;Os08g0434700;Os07g0438500
Novel_1_4486	Os10g0399901
osa-miR5144-3p	Os08g0138600;Os03g0688600;Os11g0199200;Os10g0132901;Os03g0586700;Os09g0545500;Os10g0364900;Os01g0201900;Os01g0614400;Os07g0492500;Os02g0220400;Os03g0587100;Os04g0528100;Os03g0567600;Os06g0594100;Os01g0323000;Os07g0679100;Os05g0575300;Os08g0174700;Os06g0225100;Os10g0544500;Os09g0251100;Os06g0497275;Os05g0144400;Os03g0800200;Os06g0545900;Os02g0200900;Os01g0206700;Os10g0462200;Os05g0560600;Os01g0836…
osa-miR160c-5p	Os12g0569500;Os06g0685700;Os10g0479900;Os03g0227601;Os07g0515200;Os08g0494200;Os02g0165200;Os12g0197500;Os11g0175300;Os07g0218832;Os09g0466800;Os11g0106083;Os04g0690600;Os02g0628600;Os03g0107700;Os09g0392700;Os04g0519700
Novel_8_34921	Os11g0286500;Os07g0272900;Os01g0645650;Os12g0443101;Os01g0569800
osa-miR167b	Os02g0708300;Os06g0118900;Os03g0161950;Os03g0674700;Os07g0522600;Os02g0742700;Os06g0269200;Os09g0327600;Os07g0481400;Os01g0971900;Os10g0476300;Os02g0211350;Os02g0164900;Os02g0681100;Os08g0120200;Os02g0611250;Os06g0698785;Os05g0108300;Os04g0682300;Os06g0334300;Os03g0211800;Os06g0526800;Os04g0671900;Os12g0613700;Os11g0162000;Os06g0677800;Os01g0276800;Os01g0852200;Os06g0129100;Os01g0192550;Os09g0567…
Novel_9_35947	Os07g0508300;Os01g0116300;Os01g0884200;Os08g0515900;Os03g0668033
osa-miR11340-3p	Os07g0592000;Os06g0503900;Os01g0587400;Os07g0296000;Os08g0256750
osa-miR395y	Os01g0346400;Os03g0330000;Os04g0665800;Os07g0496000;Os04g0585400;Os02g0620800;Os07g0590700;Os02g0272900;Os03g0195300;Os06g0556451;Os04g0650300;Os03g0195500;Os04g0367000;Os03g0731500;Os10g0502600;Os11g0668100;Os08g0367400;Os02g0190300;Os06g0486000;Os10g0115600;Os03g0743900;Os02g0190000;Os09g0567900
Novel_8_33937	Os06g0207950;Os03g0558400
osa-miR397b	Os03g0151600;Os09g0452900;Os02g0767150;Os01g0850700;Os01g0850800;Os03g0265500;Os01g0228901;Os05g0125050;Os01g0842500;Os09g0380450;Os06g0140300;Os05g0458600;Os01g0850550;Os10g0139500;Os05g0564300;Os03g0273200;Os12g0258700;Os01g0634500;Os05g0458500
Novel_3_14504	Os02g0813500
Novel_12_48298	Os08g0483200;Os02g0550800;Os01g0296900;Os03g0170400;Os08g0367850;Os11g0116000;Os08g0486266;Os05g0127200;Os05g0534500;Os10g0130500;Os02g0179250;Os01g0274601;Os09g0123500;Os06g0286310;Os02g0833200;Os12g0135000;Os10g0104300;Os01g0715800;Os01g0841050;Os03g0683900;Os07g0647800;Os03g0421100;Os01g0279500;Os08g0430050;Os06g0200800;Os12g0583500;Os06g0215200;Os05g0419800;Os06g0579600;Os04g0350100;Os10g0406…
Novel_6_26700	Os07g0456033;Os06g0341300;Os07g0434700;Os01g0323300
osa-miR156h-5p	Os12g0441600;Os07g0456700;Os03g0412300;Os02g0752300;Os01g0140100;Os07g0505200;Os04g0681400;Os08g0437050;Os04g0653000;Os08g0509600;Os04g0411300;Os02g0445200;Os05g0143600;Os09g0382000;Os01g0657100;Os11g0496600;Os03g0735400;Os05g0305900;Os09g0491532;Os03g0561400;Os09g0566400;Os04g0681600;Os11g0141800;Os06g0649800;Os02g0174100;Os10g0563900;Os01g0769000;Os06g0542350;Os07g0616850;Os10g0535900;Os05g0555…
osa-miR2863b	Os02g0218400;Os02g0521300;Os09g0344500;Os02g0564000;Os07g0534400;Os12g0207500;Os10g0355800;Os02g0780500;Os06g0218200;Os10g0457600;Os01g0536000;CAA34003;Os02g0523650;Os01g0552050;Os06g0548500;Os09g0343200;Os01g0111200;Os11g0533500;Os06g0251000;Os06g0484950;Os03g0176100;Os10g0179000
Novel_4_19717	Os06g0474800
Novel_3_13001	Os11g0428500;Os06g0579100;Os10g0544950;Os08g0162400;Os06g0676400;Os04g0525200;Os03g0358700;Os07g0676700;Os01g0899500;Os04g0272700
osa-miR5075	Os12g0538066;Os01g0649732;Os04g0399800;Os05g0494900;Os01g0595100;Os09g0534000;Os02g0225100;Os07g0614700;Os01g0233500;Os08g0118300;Os03g0728800;Os04g0132400;Os09g0363600;Os06g0703300;Os09g0364000;Os05g0172500;Os05g0358900;Os03g0832850;Os03g0186500;Os12g0193000;Os02g0787800;Os05g0564100;Os06g0153200;Os01g0198900;Os07g0667000;Os11g0207000;Os09g0397300;Os03g0759700;Os06g0326000;Os10g0205300;Os01g0567…
osa-miR11336-3p	Os03g0255200;Os08g0559501;Os02g0768100;Os02g0266900;Os05g0114950;Os04g0432200;Os06g0532301;Os02g0184100;Os07g0601900;Os04g0196200;Os05g0512200;Os03g0365250;Os09g0271000;Os01g0530400;Os06g0340200;Os07g0123000;Os03g0782200;Os04g0454600;Os10g0476900;Os04g0455401;Os01g0392800;Os02g0466050;Os06g0303800;Os06g0176300;Os08g0501700;Os08g0494400;Os12g0540000;Os03g0229575;Os07g0537200;Os12g0568350;Os06g0693…
osa-miR162a	Os03g0121800;Os03g0100300;Os03g0798300;Os02g0602900;Os12g0223300;Os02g0318450;Os03g0640100;Os05g0476350;Os01g0604100;Os05g0513200;Os05g0121200;Os10g0126000;Os01g0234100;Os03g0257600;Os02g0249700;Os07g0182900
Novel_2_6782	Os10g0427100;Os03g0234100
osa-miR167a-5p	Os09g0567700;Os01g0192550;Os01g0265800;Os11g0162000;Os06g0677800;Os01g0852200;Os01g0276800;Os06g0129100;Os04g0671900;Os12g0613700;Os06g0526800;Os06g0334300;Os03g0211800;Os02g0681100;Os08g0120200;Os06g0698785;Os02g0611250;Os05g0108300;Os04g0682300;Os02g0164900;Os10g0476300;Os02g0211350;Os01g0971900;Os07g0481400;Os09g0327600;Os02g0742700;Os06g0269200;Os03g0674700;Os07g0522600;Os02g0708300;Os03g0161…
osa-miR1858b	Os12g0528000;Os01g0294700;Os07g0674300;Os07g0108900;Os03g0409600;Os10g0500500;Os06g0664300;Os08g0246400;Os09g0528000;Os03g0412400;Os05g0104000;Os05g0470000;Os05g0516600;Os05g0144800;Os03g0791500;Os03g0726100;Os05g0515400;Os05g0566300;Os05g0519500;Os03g0308800;Os06g0258500;Os01g0329400;Os01g0329900;Os07g0542600;Os07g0578200;Os02g0141000;Os02g0234500;Os05g0295200;Os03g0805400;Os10g0540100;Os01g0232…
Novel_4_19029	Os09g0530800;Os01g0535400;Os08g0522600;Os03g0122300;Os06g0676400;Os09g0551800;Os01g0830200;Os03g0309800;Os02g0210800;Os01g0860400;Os10g0572500;Os05g0411600;Os03g0836000;Os07g0560700;Os05g0268400;Os05g0172100;Os01g0850550;Os10g0550800;Os07g0222700;Os07g0203300;Os04g0408700;Os03g0310701;Os05g0172500;Os01g0698000;Os01g0818900;Os01g0381325
Novel_12_45105	Os06g0542350;Os07g0189400;Os02g0500250;Os06g0242700;Os04g0226633;Os02g0301800;Os10g0571100;Os10g0136450
Novel_4_19062	Os04g0385650;Os09g0116100
osa-miR2118r	Os05g0297800;Os04g0435300;Os06g0125000;Os02g0543200;Os02g0118200;Os08g0296700;Os08g0265300;Os11g0485900;Os11g0212000;Os04g0111900;Os05g0281400;Os06g0621800;Os12g0467300;Os03g0110700;Os02g0258300;Os08g0539700;Os02g0628100;Os05g0414200;Os01g0308300;Os12g0511600;Os10g0161400;Os09g0268100;Os08g0332600;Os12g0191200
Novel_4_17120	Os01g0781700;Os12g0198400;Os12g0563500;Os01g0782100;Os08g0506000;Os03g0100900;Os06g0286500;Os07g0668800;Os08g0245400;Os02g0595300;Os09g0515100
Novel_12_45912	Os05g0477800;Os12g0570500
osa-miR812q	Os11g0199000;Os03g0339900
osa-miR395b	Os01g0346400;Os03g0330000;Os07g0496000;Os04g0665800;Os07g0590700;Os02g0620800;Os04g0585400;Os02g0272900;Os03g0195300;Os06g0556451;Os04g0650300;Os03g0195500;Os04g0367000;Os03g0731500;Os10g0502600;Os02g0190300;Os08g0367400;Os11g0668100;Os10g0115600;Os06g0486000;Os03g0743900;Os09g0567900;Os02g0190000
osa-miR820a	Os02g0468400;Os03g0757000;Os09g0404600;Os06g0256300;Os01g0596300;Os09g0405400;Os12g0108900;Os09g0406400;Os06g0328800;Os12g0641400;Os09g0406500;Os06g0646700;Os01g0195400;Os03g0195200;Os06g0218300;Os09g0536350;Os09g0405600;Os04g0407500;Os02g0182200;Os09g0419200;Os10g0519400;Os03g0200700;Os05g0548100;Os05g0342100;Os06g0231350;Os07g0670600;Os02g0721800;Os09g0405500;Os03g0766900;Os06g0664300;Os04g0581…
osa-miR166a-5p	Os03g0616300;Os04g0278550;Os03g0425300;Os04g0563050;Os12g0249900;Os01g0162200;Os04g0486800;Os10g0411500;Os08g0247600;Os01g0545500;Os01g0970700;Os02g0754500;Os01g0148700;Os04g0455900;Os06g0102700;Os08g0433100;Os01g0909300;Os03g0823100;Os03g0808600;Os05g0437900;Os04g0542200;Os03g0793550;Os05g0102800
Novel_2_7882	Os10g0350200;Os08g0256750
osa-miR1864	Os04g0110300;Os04g0190000;Os01g0242300
osa-miR812m	Os11g0199000;Os03g0268400;Os01g0882000;Os03g0439900;Os06g0715400;Os02g0771600;Os06g0187050;Os06g0177200;Os01g0274901;Os04g0413200;Os06g0610400;Os03g0227400;Os02g0176100;Os06g0176100;Os12g0138000;Os12g0243050;Os09g0333600;Os05g0227901
osa-miR5143b	Os02g0756850;Os04g0465000;Os03g0138200
Novel_12_47279	Os02g0179900;Os12g0604600;Os02g0244700;Os01g0867800;Os01g0765300;Os03g0570775;Os08g0195900;Os09g0469400;Os10g0138300;Os01g0832900;Os09g0471600;Os04g0661800
osa-miR535-3p	Os02g0518600;Os11g0631900;Os03g0188100;Os12g0446500;Os02g0755900;Os06g0731500;Os03g0790900;Os02g0829600;Os04g0430000;Os06g0622700;Os02g0248200;Os12g0138100;Os06g0596300;Os01g0782100;Os11g0141500;Os02g0765925;Os07g0582450;Os05g0180400;Os05g0543150;Os07g0606600;Os03g0790700;Os07g0270950;Os08g0481000
osa-miR814a	Os03g0856000;Os03g0668033;Os06g0594100;Os12g0583500;Os11g0649700;Os09g0551300;Os11g0167300;Os02g0705300;Os12g0583801;Os01g0116300;Os06g0718400;Os10g0406701
osa-miR2877	Os05g0364500;Os03g0232200;Os11g0426850
Novel_5_23663	Os01g0687300
Novel_8_33452	Os02g0152200;Os02g0116000;Os03g0395700;Os04g0468000;Os06g0274500;Os02g0237801;Os12g0292200;Os12g0126600;Os06g0675900;Os12g0568350;Os02g0280700;Os03g0410300;Os06g0644200;Os06g0548800;Os06g0633300;Os02g0176100;Os07g0169100;Os04g0472200;Os08g0437050;Os04g0290450;Os01g0819233;Os03g0829466;Os08g0377150;Os03g0425300;Os10g0547200;Os10g0410900;Os03g0332201;Os08g0205650;Os03g0365250;Os03g0655000;Os03g0255…
osa-miR2871b-3p	Os03g0586700;Os06g0105400;Os11g0582500;Os03g0332400;Os03g0160000;Os06g0667200;Os09g0298266;Os03g0379801;Os06g0564100;Os03g0666850;Os08g0280600;Os02g0663300;Os10g0197700;Os08g0530033;Os12g0291000;Os01g0967100;Os06g0268700;Os06g0594100;Os03g0602600;Os03g0184600;Os03g0604500;Os11g0592375;Os03g0294650;Os04g0544700;Os08g0336500;Os06g0686550;Os08g0111200;Os09g0505850;Os02g0696650;Os02g0535700;Os10g0205…
osa-miR1861a	Os03g0741900;Os06g0527100;Os09g0460250;Os01g0584250;Os07g0299600;Os06g0705200;Os06g0706600;Os06g0210000;Os11g0244900;Os02g0608200;Os01g0600300;Os01g0852500;Os06g0667000;Os07g0603300;Os09g0499600;Os11g0170400
osa-miR396g	Os04g0307300;Os12g0126300;Os10g0102900;Os08g0525800;Os03g0729500;Os07g0275300;Os03g0674700;Os01g0510800;Os01g0947833;Os09g0471200;Os07g0248800;Os12g0484900;Os11g0606600;Os01g0737900;Os11g0303500;Os08g0190300;Os04g0609900;Os03g0816000;Os04g0568800;Os12g0204800;Os02g0678800;Os11g0551900;Os02g0188201;Os02g0701300;Os07g0134600;Os07g0154900;Os04g0650700;Os01g0514300;Os06g0204800;Os02g0531450;Os02g0776…
osa-miR408-5p	Os09g0423800;Os01g0894075;Os03g0213300;Os01g0860700;Os11g0163600;Os05g0556350;Os08g0504000;Os01g0210400;Os02g0108100;Os02g0157100;Os07g0545500;Os09g0401550;Os11g0184350;Os03g0262500;Os02g0194400;Os06g0163300;Os02g0793300;Os01g0861400;Os05g0357200;Os10g0538200;Os12g0233400;Os01g0668700;Os08g0124850;Os12g0601300;Os01g0728000;Os09g0402300;Os04g0487100;Os06g0146600;Os01g0623550;Os06g0218500;Os11g0189…
osa-miR2121a	Os06g0675900;Os01g0709750;Os10g0134250;Os06g0552400;Os12g0288266;Os01g0326100;Os11g0146950;Os02g0179250;Os02g0517333;Os01g0339600;Os03g0219800;Os03g0712600;Os02g0630650;Os02g0741700;Os07g0191900;Os01g0390900
osa-miR3981-3p	Os06g0579100;Os10g0137700;Os09g0123500;Os05g0429802;Os06g0286310;Os08g0439100;Os01g0779300;Os05g0171900;Os03g0145900;Os01g0528800;Os03g0683900;Os06g0136201;Os01g0296900;Os06g0129400;Os03g0421100;Os01g0279500;Os02g0611000;Os08g0486266;Os03g0797300;Os07g0689400
osa-miR164a	Os10g0571100;Os11g0149400;Os08g0200600;Os10g0420000;Os08g0250900;Os02g0625000;Os05g0589500;Os04g0486800;Os07g0280600;Os12g0641100;Os05g0162350;Os12g0610600;Os02g0436400;Os04g0625000;Os04g0528651;Os09g0549400;Os06g0344900;Os08g0434150;Os07g0461550;Os06g0575400;Os06g0675600;Os02g0740300;Os02g0677800;Os08g0331000;Os03g0424000;Os08g0202300;Os06g0106000;Os02g0154600;Os01g0128000;Os06g0699301;Os01g0572…
Novel_11_42975	Os05g0558400;Os06g0273300;Os10g0528900;Os08g0373000;Os08g0537200;Os09g0397200;Os01g0549200;Os01g0623600;Os04g0531700;Os11g0615900;Os09g0494600;Os03g0239200;Os08g0529000;Os08g0448100;Os10g0549500;Os10g0415600;Os12g0544600;Os01g0768600;Os09g0485600
Novel_6_27901	Os03g0257600;Os05g0515400;Os12g0609000
osa-miR1319b	Os04g0296700;Os08g0437050;Os01g0542100;Os10g0529600;Os11g0286500;Os03g0365700;Os12g0443101
osa-miR818b	Os06g0580100;Os06g0695800;Os07g0572100;Os10g0571200;Os04g0667100;Os04g0451200;Os09g0109800;Os06g0148000;Os09g0260900;Os12g0616000;Os03g0376350;Os01g0186400;Os05g0480000;Os01g0651200;Os01g0785700;Os02g0652100;Os06g0287500;Os01g0107000;Os03g0363500;Os01g0274601;Os01g0824600;Os07g0471683;Os01g0805975;Os03g0777600;Os02g0130200;Os10g0104300;Os12g0264500;Os07g0489950;Os08g0483200;Os03g0170400;Os08g0176…
osa-miR5148b	Os07g0193600;Os06g0626200;Os01g0928600;Os03g0795000;Os09g0385300;Os12g0420100;Os04g0484850
Novel_3_11826	Os05g0267100
osa-miR5148a	Os07g0193600;Os06g0626200;Os01g0928600;Os12g0420100;Os09g0385300;Os03g0795000;Os04g0484850
Novel_7_30535	Os08g0256750;Os10g0350200
Novel_12_46480	Os10g0404500;Os01g0921100;Os01g0243800;Os12g0426750;Os08g0494400;Os08g0501700;Os05g0418901;Os07g0189800;Os10g0476900;Os10g0339182;Os11g0148400;Os06g0161300;Os05g0114950;Os02g0631801;Os09g0572400;Os03g0255200;Os03g0655000;Os08g0205650;Os03g0365250;Os03g0332201;Os10g0410900;Os10g0547200;Os08g0377150;Os03g0425300;Os03g0829466;Os01g0819233;Os04g0290450;Os08g0437050;Os04g0472200;Os07g0169100;Os02g0176…
Novel_11_43527	Os02g0144300;Os07g0114000;Os01g0516600;Os11g0131800;Os05g0504800;Os11g0472000;Os10g0569500
osa-miR396e-3p	Os04g0674500;Os12g0129550;Os03g0674600;Os02g0829000
osa-miR7693-5p	Os08g0285100;Os10g0540200;Os10g0524400;Os01g0733700
osa-miR6251	Os01g0850550;Os11g0114800;Os12g0636000;Os07g0693700;Os04g0177000;Os12g0510200;Os06g0645400;Os03g0165100;Os03g0336700;Os09g0421700;Os07g0486500;Os02g0672200;Os01g0805975;Os11g0552100;Os10g0574901;Os03g0387000;Os03g0815700;Os04g0104900
Novel_12_45742	Os03g0558400;Os06g0207950
osa-miR5498	Os04g0649150;Os01g0120300;Os07g0172900;Os06g0237300;Os07g0599150;Os01g0323300;Os10g0108800;Os03g0218500;Os12g0605850;Os09g0544300
osa-miR5806	Os02g0250300;Os06g0255900;Os02g0649900;Os01g0654100;Os01g0390300;Os01g0829700;Os03g0713000;Os11g0584200;Os02g0465600;Os05g0178950;Os03g0650700;Os07g0160000;Os08g0538800;Os08g0389700;Os03g0262100;Os08g0124566;Os02g0688900
Novel_12_47305	Os11g0485900;Os04g0466100;Os03g0791200;Os08g0107800;Os03g0234100;Os10g0427100;Os05g0107600;Os02g0681000;Os07g0110000;Os11g0208400;Os03g0248000;Os05g0426200
Novel_4_18457	Os02g0795000;Os04g0284500;Os12g0104300;Os04g0684100;Os04g0576800;Os07g0493400
Novel_3_15835	Os02g0237801;Os11g0606001;Os02g0141201;Os06g0241100;Os04g0253601;Os06g0216966;Os10g0370400;Os06g0136201;Os02g0727966;Os07g0474700;Os06g0205250;Os09g0414600;Os08g0232700;Os12g0138800
Novel_3_12370	Os10g0466500;Os08g0390200;Os01g0371200;Os02g0581500;Os10g0558900;Os03g0773700;Os06g0653100;Os09g0306400;Os05g0388500;Os04g0492300;Os03g0570775;Os12g0632700;Os10g0564450;Os05g0521650;Os11g0171100;Os01g0817400;Os06g0581300;Os01g0129500;Os02g0771700;Os01g0176300;Os08g0432000
Novel_10_40078	Os11g0472000;Os05g0504800;Os01g0516600;Os02g0144300;Os11g0131800
osa-miR167h-3p	Os02g0795000;Os08g0425050;Os01g0201800;Os11g0648400;Os01g0836800;Os01g0977600;Os01g0310800;Os01g0563700;Os05g0406300;Os10g0496000;Os01g0295900;Os03g0405900;Os03g0161950;Os11g0610000;Os02g0762300;Os03g0361500;Os04g0569000;Os08g0494300;Os08g0144000;Os10g0531300;Os10g0204400;Os06g0693300;Os12g0485000;Os11g0609700;Os10g0127700;Os01g0598900;Os08g0230300;Os01g0201900
osa-miR2871a-3p	Os03g0379801;Os09g0298266;Os06g0667200;Os03g0160000;Os11g0582500;Os03g0332400;Os06g0105400;Os03g0586700;Os06g0268700;Os01g0967100;Os12g0291000;Os08g0530033;Os10g0197700;Os02g0663300;Os08g0280600;Os03g0666850;Os06g0564100;Os11g0592375;Os03g0604500;Os03g0184600;Os03g0602600;Os06g0594100;Os10g0205300;Os02g0696650;Os02g0535700;Os09g0505850;Os06g0686550;Os08g0111200;Os08g0336500;Os03g0294650;Os04g0544…
osa-miR5827	Os04g0563050;Os08g0421000;Os03g0247100;Os06g0474800;Os10g0547900;Os01g0235200;Os11g0664500;Os11g0474500;Os12g0235800;Os02g0577100;Os01g0857600;Os02g0738900;Os04g0372100;Os04g0550300;Os12g0424300;Os05g0109600;Os03g0257700;Os05g0148700;Os07g0644200;Os07g0568700;Os01g0214800;BAC19882;Os02g0111900;Os03g0141700;Os02g0787700;Os11g0607200;Os08g0176200;Os01g0222300;Os11g0204800;Os01g0285300;Os01g0137250;…
osa-miR2869	Os09g0368200;Os06g0127000
osa-miR2871a-5p	Os04g0570800
osa-miR171i-3p	Os06g0105350;Os01g0976900;Os06g0660200;Os08g0548500;Os02g0662700;Os12g0270300;Os01g0185300;Os04g0555000;Os08g0399900;Os06g0232300;Os03g0454100;Os08g0500300;Os05g0496500;Os02g0663100;Os02g0302900;Os08g0387200;Os02g0810300;Os01g0183100;Os10g0147900;Os10g0551200
osa-miR2870	Os08g0414300;Os11g0524051;Os01g0670600;Os06g0314300;Os12g0558366;Os08g0502800;Os04g0559200;Os04g0440300;Os11g0606300;Os01g0936100;Os06g0551800;Os07g0153400;Os12g0441700
Novel_12_48268	Os11g0153700;Os05g0171300;Os01g0256300;Os10g0542400;Os10g0151800;Os12g0618400;Os05g0400100;Os04g0602000;Os10g0558400;Os02g0152500;Os04g0101400;Os07g0668700;Os10g0208500;Os03g0112400;Os11g0426850;Os05g0207400;Os02g0537500;Os04g0683400;Os03g0151100;Os06g0102100;Os01g0301500
Novel_5_22201	Os12g0570500;Os05g0477800
osa-miR396f-3p	Os02g0829000;Os06g0332900;Os12g0129550;Os11g0481150;Os08g0246400;Os04g0674500
Novel_3_15235	Os12g0164800;Os06g0539250
osa-miR1846e	Os08g0324600;Os01g0239150;Os11g0635300;Os11g0170400;Os04g0423200;Os03g0324700;Os08g0118300;Os05g0554000;Os12g0122100;Os03g0151100;Os07g0143900;Os03g0246500;Os05g0161700;Os01g0862500;Os10g0426100;Os03g0587250;Os11g0124500;Os08g0236800;Os09g0390400;Os03g0208500;Os01g0937050;Os10g0521900;Os04g0454250;Os10g0463900;Os12g0149900;Os11g0635500;Os03g0436600;Os03g0847600;Os04g0507100;Os02g0133800;Os06g0115…
Novel_5_23612	Os09g0485600;Os10g0528900
osa-miR395v	Os03g0743900;Os09g0567900;Os11g0668100;Os04g0367000;Os01g0246100;Os08g0461300;Os03g0731500;Os08g0425700;Os06g0129100;Os01g0757400;Os12g0238000;Os03g0615300;Os08g0191300;Os03g0300900;Os03g0330000;Os12g0106000;Os02g0137500;Os11g0106700;Os08g0367400;Os10g0437000;Os05g0169200;Os12g0588900;Os01g0725600;Os03g0195500;Os01g0560000;Os01g0229000;Os03g0195300;Os06g0592951;Os10g0208500;Os10g0426100;Os07g0152…
Novel_4_19535	Os08g0504000;Os07g0634900;Os09g0530700
Novel_3_12053	Os04g0482600;Os04g0393100;Os05g0549000;Os07g0259700;Os01g0917900;Os05g0352700;Os09g0482640;Os11g0158400
osa-miR398b	Os10g0567200;Os06g0663100;Os11g0129301;Os03g0351500;Os03g0214100;Os03g0604401;Os07g0436350;Os01g0916400;Os04g0163425;Os12g0126050;Os12g0125550;Os07g0665200
Novel_8_35283	Os05g0185700
osa-miR156l-5p	Os10g0535900;Os01g0857500;Os08g0531600;Os02g0174100;Os04g0503200;Os01g0769000;Os01g0756700;Os06g0703500;Os06g0142100;Os12g0119700;Os02g0139400;Os08g0110300;Os03g0660000;Os06g0138700;Os02g0554100;Os11g0490200;Os06g0644600;Os09g0507100;Os12g0456700;Os09g0568200;Os04g0551500;Os07g0505200;Os01g0922600;CAA33914;Os03g0281000;Os08g0437050;Os08g0509600;Os06g0554800;Os02g0161500;Os11g0496600;Os06g0718100;…
Novel_7_29375	Os02g0152600;Os11g0591800;Os10g0388200;Os02g0816100
osa-miR812e	Os11g0550300;Os02g0526650;Os03g0268400;Os06g0177200;Os11g0586100;Os06g0140200;Os03g0714400;Os06g0578100;Os01g0694500;Os11g0475000;Os01g0387865;Os09g0333600;Os05g0227901;Os08g0434566;Os07g0151650;Os06g0610350;Os09g0109800;Os12g0243050;Os06g0715400;Os03g0439900;Os12g0583801;Os11g0199000;Os01g0882000;Os01g0608900;Os01g0274901;Os06g0681600;Os06g0187050;Os02g0771600;Os03g0339900;Os06g0673300;Os04g0413…
osa-miR11340-5p	Os07g0296000;Os11g0460700;Os08g0430050;Os08g0256750;Os11g0599100;Os04g0175300;Os11g0466966
osa-miR5539b	Os07g0694800;Os08g0206700;Os10g0317300;Os01g0594500;Os07g0667350
Novel_10_40659	Os01g0608900;Os11g0586100;Os04g0558700;Os01g0274901;Os08g0235651;Os12g0138000;Os02g0771600;Os04g0294401;Os04g0413200
Novel_1_2889	Os07g0493400;Os04g0684100;Os04g0576800;Os12g0104300;Os02g0795000;Os04g0284500
osa-miR2928	Os03g0837100;Os01g0850550;Os01g0232300;Os11g0600700;Os01g0855000;Os08g0367400;Os02g0622350;Os04g0430600;Os11g0140900;Os03g0195900;Os01g0687500;Os06g0674000;Os01g0164500;Os01g0778100;Os02g0148000;Os06g0656500;Os01g0115566;Os09g0536100;Os05g0497600;Os01g0124000;Os11g0672400;Os08g0103300;Os01g0886500;Os02g0258300;Os02g0129000;Os07g0212400;Os06g0714900;Os01g0818400;Os01g0366400;Os01g0293800;Os01g0866…
osa-miR11337-5p	Os01g0191400;Os01g0694400;Os07g0185700;Os04g0468000;Os01g0681400;Os05g0172000;Os04g0580300;Os06g0136201;Os08g0224150;Os06g0724600;Os12g0210000;Os06g0478600;Os01g0776800;Os01g0177900;Os05g0506800;Os12g0285100;Os04g0250050;Os01g0511600;Os01g0131250;Os02g0525600;Os04g0309500;Os02g0796300;Os09g0240850;Os06g0674000;Os12g0228400;Os08g0511500;Os01g0865800;Os07g0446800;Os02g0121600;Os04g0651500;Os11g0240…
osa-miR2118e	Os08g0539700;Os02g0258300;Os03g0110700;Os12g0467300;Os12g0191200;Os08g0332600;Os09g0268100;Os10g0161400;Os01g0308300;Os12g0511600;Os02g0628100;Os05g0414200;Os04g0435300;Os05g0297800;Os06g0621800;Os05g0281400;Os11g0212000;Os04g0111900;Os11g0485900;Os02g0543200;Os02g0118200;Os08g0296700;Os08g0265300;Os06g0125000
osa-miR160d-5p	Os04g0690600;Os02g0628600;Os11g0106083;Os09g0466800;Os07g0218832;Os04g0519700;Os09g0392700;Os03g0107700;Os10g0479900;Os06g0685700;Os12g0569500;Os11g0175300;Os12g0197500;Os02g0165200;Os08g0494200;Os07g0515200;Os03g0227601
osa-miR815c	Os09g0242600;Os10g0198333;Os08g0511500;Os12g0568800;Os04g0173300;Os02g0228300;Os03g0614901;Os09g0357300;Os05g0185767;Os09g0563800;Os03g0163500;Os07g0662550;Os01g0875400;Os03g0829466;Os07g0238700;Os01g0523250;Os07g0507300;Os08g0398400;Os02g0616450;Os08g0107800;Os05g0362000;Os01g0231900;Os10g0161800;Os08g0542600;Os04g0221450;Os01g0258000;Os06g0315900;Os01g0609300;Os01g0818700;Os10g0381800;Os10g0390…
osa-miR395k	Os02g0272900;Os03g0195300;Os06g0556451;Os02g0620800;Os04g0585400;Os07g0590700;Os03g0330000;Os04g0665800;Os07g0496000;Os01g0346400;Os03g0743900;Os02g0190000;Os09g0567900;Os11g0668100;Os02g0190300;Os08g0367400;Os06g0486000;Os10g0115600;Os04g0367000;Os10g0502600;Os03g0731500;Os04g0650300;Os03g0195500
Novel_9_37663	Os01g0544200;Os04g0651500;Os06g0580100;Os06g0579600;Os10g0406701;Os12g0615500;Os04g0526200;Os03g0817800;Os07g0616750;Os11g0501000;Os03g0734000;Os02g0773700;Os09g0260900;Os12g0616000;Os01g0785700;Os06g0698748;Os02g0522300;Os09g0392666;Os10g0130500;Os09g0283200;Os01g0264400;Os06g0256600;Os07g0471683;Os01g0202500;Os03g0756200;Os01g0296900;Os01g0908001;Os08g0207600;Os03g0170400;Os06g0262501;Os07g0489…
osa-miR167d-3p	Os08g0135300;Os03g0425300;Os06g0472350;Os02g0220700;Os10g0572500;Os01g0816600;Os03g0161950;Os01g0125900;Os11g0661000;Os03g0416200;Os02g0284500;Os12g0169700;Os01g0738500;Os01g0134850;Os05g0172300;Os02g0224100;Os08g0492000;Os07g0587400;Os10g0163130;Os12g0209300;Os05g0418500
Novel_2_10041	Os02g0780600;Os02g0174500;Os08g0417100;Os07g0550900;Os05g0443400;Os01g0116300;Os06g0152550;Os03g0259001;Os05g0244500;Os03g0145900;Os12g0138000;Os11g0167200;Os01g0884200;Os12g0406000;Os01g0230700;Os03g0748100;Os05g0119000;Os02g0674233
osa-miR11337-3p	Os07g0160100;Os01g0316001;Os10g0556700;Os06g0237300;Os07g0521600
osa-miR166e-3p	Os12g0612700;Os09g0415050;Os02g0103800;Os05g0263100;Os04g0571600;Os10g0480200;Os03g0640800;Os03g0163200;Os06g0212300;Os02g0676400;Os03g0651201;Os03g0109400;Os02g0526000;Os08g0447200;Os02g0729300;Os03g0205800;Os02g0550600
Novel_8_35092	Os07g0272900;Os11g0286500;Os01g0645650;Os12g0443101;Os01g0569800
Novel_5_23330	Os05g0418100;Os01g0632100;Os05g0534500;Os02g0525501;Os03g0649275;Os08g0486266;Os07g0618500;Os01g0916350;Os12g0105800;Os12g0122400;Os05g0172000;Os12g0288000;Os01g0715800;Os05g0131000;Os12g0115300;Os12g0135000;Os08g0421000;Os01g0230700;Os04g0350100;Os04g0380300;Os04g0396800;Os04g0556500;Os06g0574100;Os06g0676400;Os01g0939000;Os02g0179250;Os12g0110475;Os08g0286500
Novel_7_30257	Os05g0362000;Os02g0778900;Os12g0292200;Os04g0436400;Os10g0210500;Os06g0674000;Os01g0686100;Os12g0543701;Os03g0393700;Os02g0612700;Os11g0474450;Os12g0570400
Novel_2_7228	Os06g0207950;Os03g0558400
osa-miR156i	Os07g0583500;Os03g0660000;Os09g0439800;Os05g0480700;Os11g0157600;Os02g0100300;Os06g0229800;Os01g0513950;Os05g0562200;Os04g0117900;Os02g0554100;Os01g0769000;Os06g0649800;Os10g0563900;Os02g0174100;Os05g0555600;Os06g0542350;Os07g0616850;Os10g0535900;Os12g0121600;Os03g0752300;Os04g0107650;Os01g0756700;Os12g0114100;Os02g0290000;Os02g0445200;Os04g0411300;Os05g0143600;Os01g0657100;Os09g0382000;Os03g0735…
Novel_6_26355	Os02g0131400;Os09g0428750;Os07g0408500;Os08g0300700
osa-miR810b.1	Os09g0400000;Os04g0136802;Os02g0716800;Os02g0648100;Os04g0626300;Os04g0653400;Os09g0400300;Os04g0517900;Os03g0710100;Os06g0295000;Os02g0575900;Os09g0466800;Os08g0253800;Os06g0240600;Os07g0642200;Os02g0583500;Os03g0209500;Os02g0680500;Os10g0438800;Os11g0671650;Os03g0637800;Os02g0156000;Os02g0787600;Os04g0469700;Os02g0794500
Novel_3_13756	Os12g0612500;Os07g0682600;Os07g0160100;Os05g0415600;Os04g0504000;Os12g0274450;Os07g0643800;Os02g0282000;Os10g0551100;Os01g0785400;Os04g0446300;Os09g0567100;Os03g0757500;Os09g0346500;Os04g0313600;Os05g0318600;Os07g0663200;Os10g0369500;Os04g0278200;Os06g0167500;Os07g0120900;Os03g0651201;Os02g0141201;Os09g0260900;Os03g0145900;Os07g0553600;Os04g0324550;Os12g0561900;Os11g0635000;Os07g0572100;Os08g0149…
osa-miR11339-3p	Os03g0252100;Os08g0137225;Os12g0234000;Os10g0420800;Os04g0539701;Os06g0548800;Os03g0410300;Os04g0382550;Os04g0272200;Os05g0414600;Os01g0263600;Os01g0220900;Os03g0679800;Os08g0137300;Os02g0264700;Os08g0437050;Os10g0407400;Os11g0614800;Os03g0644000;Os03g0708400;Os02g0807700;Os10g0547200;Os02g0179250;Os03g0365250;Os02g0789700;Os02g0680400;Os02g0652100;Os02g0184100;Os10g0339182;Os02g0768100;Os12g0221…
Novel_11_41924	Os04g0474550;Os01g0296900;Os10g0399901;Os03g0170400;Os03g0306400;Os01g0513200;Os10g0420800;Os02g0313500;Os10g0130500;Os02g0522300;Os09g0392666;Os02g0759800;Os07g0203925;Os09g0283200;Os01g0264400;Os06g0256600;Os09g0260900;Os12g0616000;Os05g0194500;Os02g0266200;Os12g0163800;Os01g0737401;Os06g0698748;Os01g0785700;Os05g0419800;Os06g0580100;Os06g0579600;Os01g0544200;Os04g0651500;Os11g0501000;Os10g0406…
osa-miR2120	Os01g0815900;Os08g0231100;Os06g0561501;Os09g0339601;Os05g0185767;Os07g0296000;Os11g0427401;Os11g0233201;Os09g0343400;Os01g0958400;Os02g0616450
Novel_9_37117	Os04g0221450;Os06g0479701;Os02g0517900
osa-miR167j	Os03g0211800;Os07g0293000;Os07g0522600;Os03g0674700;Os06g0334300;Os03g0161950;Os08g0246300;Os05g0108300;Os02g0708300;Os08g0120200;Os12g0613700;Os01g0972000;Os07g0161500;Os03g0831000;Os09g0327600;Os04g0671900;Os02g0742700;Os12g0169400;Os01g0192550;Os01g0971900;Os09g0567700;Os06g0129100;Os07g0481400;Os06g0677800;Os07g0195200;Os07g0207700;Os05g0143300;Os07g0681500;Os02g0164900;Os03g0789466;Os02g0211…
Novel_3_12104	Os11g0308800
Novel_3_14139	Os11g0515500;Os02g0805300;Os04g0556400;Os06g0542350;Os08g0162066;Os01g0953000;Os01g0196800;Os12g0467200;Os03g0210900;Os04g0405900;Os06g0291500;Os06g0297600;Os09g0517100;Os11g0475000;Os12g0110200;Os06g0620200;Os04g0122000
osa-miR2930	Os02g0243300;Os02g0732400;Os05g0148800;Os02g0821800;Os05g0464150;Os07g0486500;Os03g0811800;Os05g0148000;Os03g0338700;Os07g0672300;Os02g0174800;Os04g0637000;Os03g0801600;Os06g0260000;Os05g0170800;Os08g0323600;Os05g0548200;Os01g0957200;Os05g0383100;Os07g0193800;Os05g0456401;Os03g0231850;Os07g0406800;Os03g0240800;Os03g0388650;Os02g0711400;Os10g0470100;Os03g0654400;Os08g0530000;Os11g0294300;Os03g0375…
osa-miR5809	Os01g0225100;Os04g0129050;Os06g0719500;Os06g0158800;Os07g0601100;Os05g0112800;Os04g0568400;Os09g0452400;Os01g0756200;Os01g0388200;Os09g0423200;Os10g0543500;Os12g0132000;Os01g0900900;Os08g0474400;Os10g0524000;Os12g0160650;Os07g0207800;Os02g0806700;Os05g0109600;Os04g0394100;Os01g0323775;Os01g0124550;Os04g0531900;Os12g0240850;Os01g0909400;Os09g0567500;Os03g0423300;Os08g0499900;Os02g0131700;Os09g0459…
Novel_8_35091	Os01g0569800;Os01g0645650;Os12g0443101;Os11g0286500;Os07g0272900
osa-miR419	Os02g0819300;Os02g0818700;Os06g0604400;Os10g0473400;Os05g0154700;Os11g0256300;Os03g0281800;Os06g0114066;Os01g0637500;Os02g0227700;Os09g0421300;Os09g0103150;Os08g0545000;Os01g0636500;Os03g0615700;Os01g0253400;Os03g0765200;Os06g0634500;Os09g0466900;Os11g0696900;Os11g0173800;Os01g0848300;Os01g0606000;Os01g0532600;Os09g0330700;Os12g0615150;Os02g0619600;Os06g0621600;Os02g0295700;Os04g0611000;Os06g0274…
osa-miR529b	Os09g0378700;Os01g0880200;Os01g0528000;Os12g0222900;Os03g0773000;Os01g0588400;Os05g0461600;Os01g0869000;Os11g0153300;Os04g0574200;Os01g0922600;Os09g0517600;Os08g0536800;Os11g0197975;Os07g0177100;Os08g0307601;Os01g0782100;Os02g0104500;Os04g0590900;Os01g0953600;Os01g0275500;Os06g0229400;Os05g0485000;Os01g0113200;Os10g0568300;Os02g0269400;Os03g0149700;Os02g0577501;Os02g0307300;Os04g0560200;Os11g0496…
osa-miR1862f	Os08g0388300;Os11g0151600;Os12g0614900;Os07g0649500;Os07g0508200;Os04g0389901;Os07g0642100;Os10g0571100;Os07g0649300;Os02g0644700;Os05g0215000;Os12g0209502;Os05g0143200;Os10g0542200;Os05g0579050;Os04g0613800;Os02g0649700;Os03g0726100;Os01g0349400;Os11g0159000;Os04g0660200;Os09g0296450;Os05g0596200;Os02g0614666;Os08g0189300;Os07g0466200;Os03g0816950;Os07g0166100;Os02g0244100;Os10g0559600;Os11g0247…
Novel_6_28003	Os03g0282100;Os12g0542601;Os09g0482640;Os03g0862000;Os05g0107300;Os02g0826050;Os12g0543600;Os02g0774500;Os02g0466400;Os08g0187800;Os05g0196700;Os04g0570250;Os07g0169100;Os12g0264500;Os01g0812600;Os12g0608633;Os03g0612201;Os04g0313600;Os01g0192000;Os02g0810450;Os02g0121600;Os01g0153150;Os02g0568700;Os12g0156200;Os05g0120000;Os07g0626600;Os03g0839800;Os08g0144400;Os04g0385650;Os07g0647600;Os11g0523…
Novel_11_44748	Os02g0771600;Os08g0235651;Os12g0138000;Os04g0558700;Os11g0586100;Os01g0274901;Os01g0608900;Os04g0294401;Os04g0413200
Novel_3_12210	Os06g0494701;Os05g0450733
Novel_3_13200	Os12g0583801;Os12g0218300;Os06g0601500;Os01g0863100;Os08g0462800;Os02g0736800;Os09g0301800
Novel_4_18220	Os03g0170000
osa-miR2120b-3p	Os05g0267100;Os02g0523650;Os07g0655600;Os11g0233201;Os03g0717700;Os07g0296000;Os03g0766350;Os06g0561501;Os02g0528550;Os01g0687600;Os02g0704600;Os06g0135900;Os05g0103500;Os01g0815900;Os06g0235500;Os05g0529700;Os01g0311600;Os09g0343400;Os06g0563250;Os02g0297000;Os04g0585100;Os02g0211000;Os05g0185767;Os09g0339601;Os08g0231100;Os02g0575200;Os11g0181100;Os04g0450150
Novel_11_43135	Os06g0360600
Novel_2_7062	Os10g0199500;Os06g0674000;Os09g0502100;Os08g0100700;Os01g0891700;Os05g0513400;Os03g0619600;Os08g0421000;Os01g0786000;Os02g0737801;Os07g0122100;Os03g0805800;Os09g0458200;Os09g0482720;Os11g0428800;Os02g0214050;Os05g0553000;Os02g0199300;Os12g0597600;Os05g0582400;Os01g0692200;Os11g0616100;Os12g0113001;Os08g0305300;Os01g0172100;Os05g0241100;Os09g0504900;Os02g0796400;Os02g0327000;Os06g0314300;Os04g0557…
osa-miR5152-3p	Os06g0712800;Os01g0895100;Os02g0191250;Os03g0304400;Os05g0571000;Os12g0180100;Os01g0125850
osa-miR160b-5p	Os04g0519700;Os03g0107700;Os09g0392700;Os11g0106083;Os02g0628600;Os04g0690600;Os09g0466800;Os07g0218832;Os12g0197500;Os11g0175300;Os08g0494200;Os02g0165200;Os03g0227601;Os07g0515200;Os10g0479900;Os06g0685700;Os12g0569500
osa-miR5082	Os04g0658800
osa-miR1848	Os12g0608500;Os05g0191500;Os03g0145300;Os02g0654600;Os06g0652300;Os05g0277200;Os07g0681350;Os02g0556050;Os05g0410750;Os01g0134900;Os05g0471350;Os03g0640000;Os07g0647200;Os01g0821900;Os02g0131500;Os03g0305950;Os08g0411250;Os06g0160400;Os06g0185400;Os02g0704131;Os04g0567350;Os02g0595900;Os06g0344201;Os02g0705300;Os02g0194400;Os01g0130200;Os05g0456100;Os08g0492100;Os10g0580750;Os05g0150500;Os09g0263…
osa-miR5831	Os01g0819233;Os05g0191500;Os07g0235200;Os05g0573600;Os02g0702700;Os02g0292800;Os10g0399901;Os05g0590201
Novel_10_39409	Os01g0673800;Os09g0553250;Os01g0215750;Os08g0562700;Os04g0347600;Os12g0564600;Os07g0626500;Os02g0325401;Os03g0125650;Os02g0146600;Os09g0247101;Os12g0204600;Os09g0526200;Os03g0278000;Os11g0579300;Os02g0161500;Os03g0363900;Os02g0827500;Os02g0590700;Os01g0339500;Os07g0123700;Os09g0402001;Os06g0301300;Os01g0921100;Os07g0684850;Os11g0598200;Os08g0175700
osa-miR1860-3p	Os09g0530700;Os05g0363951;Os07g0170900;Os01g0519400;Os12g0273980;Os11g0593500;Os05g0349000;Os01g0757500;Os07g0238800;Os02g0161000;Os10g0477301;Os07g0173400;Os04g0671500;Os07g0648266;Os03g0162900;Os02g0290300
osa-miR1437b-5p	Os03g0213300;Os02g0284550;Os04g0162701;Os06g0155300;Os06g0559600;Os12g0117800;Os02g0781600;Os03g0563200;Os05g0562200;Os01g0176500;Os06g0585982;Os11g0438000;Os01g0252100;Os09g0321200;Os11g0118600;Os05g0154800;Os04g0163700;Os06g0626466
Novel_3_11545	Os01g0307624;Os11g0631450;Os07g0542701;Os10g0568300;Os10g0543500;Os08g0162066;Os04g0437700;Os08g0437050;Os01g0691000;Os11g0197725;Os05g0571400;Os01g0688000;Os01g0805975;Os12g0122400;Os07g0471050;Os09g0572700;Os02g0612700;Os03g0641500;Os01g0728000;Os09g0528300;Os02g0727966;Os04g0360500;Os03g0727000;Os02g0141201;Os07g0616100;Os01g0728900;Os06g0618300
osa-miR1877	Os04g0360500;Os01g0326100
osa-miR395e	Os03g0195300;Os02g0272900;Os06g0556451;Os07g0590700;Os04g0585400;Os02g0620800;Os03g0330000;Os07g0496000;Os04g0665800;Os01g0346400;Os03g0743900;Os09g0567900;Os02g0190000;Os02g0190300;Os08g0367400;Os11g0668100;Os10g0115600;Os06g0486000;Os04g0367000;Os10g0502600;Os03g0731500;Os04g0650300;Os03g0195500
Novel_11_44112	Os01g0850050;Os01g0929800;Os10g0528900
Novel_11_42432	Os12g0609000;Os05g0515400;Os03g0257600
Novel_5_23438	Os11g0208600;Os10g0578800
Novel_2_7059	Os07g0596950;Os12g0264500;Os02g0313500;Os03g0259300;Os06g0593800;Os01g0636600;Os07g0595700;Os01g0274601;Os02g0188201;Os06g0148000;Os07g0489950
osa-miR812c	Os06g0715400;Os03g0439900;Os01g0882000;Os12g0583801;Os11g0199000;Os01g0274901;Os01g0608900;Os06g0187050;Os02g0771600;Os06g0681600;Os03g0339900;Os06g0673300;Os04g0413200;Os10g0134250;Os12g0126600;Os12g0545600;Os10g0160600;Os12g0138000;Os06g0176100;Os03g0227400;Os02g0176100;Os11g0550300;Os02g0526650;Os03g0268400;Os11g0586100;Os06g0177200;Os06g0140200;Os06g0578100;Os03g0714400;Os01g0694500;Os11g0475…
osa-miR530-3p	Os04g0290450;Os03g0639300;Os07g0191301;Os11g0258400;Os04g0243400;Os09g0311600;Os07g0111400;Os12g0158900;Os03g0262500;Os08g0520900;Os11g0241100;Os05g0398450;Os04g0417000;Os05g0584200;Os08g0175200;Os01g0748950;Os11g0187500;Os08g0430000;Os12g0441700;Os04g0602900;Os06g0168700;Os05g0270200;Os06g0288300;Os05g0451900;Os04g0612500;Os09g0434600;Os01g0504100;Os04g0113000;Os06g0225800;Os03g0197800;Os04g0596…
Novel_7_29963	Os06g0215200;Os09g0400400
osa-miR167h-5p	Os08g0120200;Os02g0708300;Os05g0108300;Os03g0161950;Os08g0246300;Os03g0674700;Os06g0334300;Os07g0293000;Os07g0522600;Os03g0211800;Os02g0742700;Os09g0327600;Os04g0671900;Os03g0831000;Os07g0161500;Os12g0613700;Os01g0972000;Os07g0207700;Os07g0195200;Os06g0677800;Os07g0481400;Os06g0129100;Os09g0567700;Os01g0192550;Os01g0971900;Os12g0169400;Os02g0211350;Os03g0789466;Os07g0681500;Os05g0143300;Os02g0164…
Novel_8_32860	Os05g0105500;Os12g0597300;Os11g0635000;Os04g0477000;Os03g0233700;Os01g0580200;Os07g0159550;Os04g0693050;Os05g0113400;Os07g0626500;Os10g0574700;Os02g0539200;Os01g0680200;Os02g0540700;Os02g0238500;Os08g0227100;Os11g0112000;Os05g0334000;Os03g0839400;Os06g0128150;Os07g0688000;Os12g0562400;Os10g0580900;Os07g0509800;Os01g0501000;Os03g0239300;Os02g0709350;Os05g0300700;Os10g0462900;Os02g0799400;Os09g0110…
osa-miR5829	Os12g0266000
Novel_2_9597	Os05g0559400;Os04g0207501;Os07g0111900;Os05g0544900;Os03g0301500;Os06g0498000;Os01g0884500;Os12g0171600;Os05g0147700;Os03g0709100;Os01g0192000;Os03g0664600;Os01g0218350;Os03g0762400;Os08g0499900;Os07g0115350;Os03g0233750;Os09g0421166;Os07g0541000;Os12g0433500;Os03g0762200;Os09g0543900;Os06g0127250;Os08g0108500;Os04g0663600;Os12g0295600;Os09g0460200;Os12g0630500;Os04g0540600;Os10g0423700;Os03g0411…
osa-miR167i-3p	Os12g0515300;Os08g0162300;Os01g0809450;Os02g0830801;Os09g0567400;Os01g0148400;Os02g0510000;Os05g0398000;Os03g0279400;Os03g0698350;Os04g0454600;Os05g0185767;Os04g0455401;Os08g0224200;Os03g0161950;Os11g0303200;Os01g0251200;Os03g0425300;Os11g0551900;Os02g0433600;Os01g0558800;Os01g0777800;Os02g0795100
osa-miR5076	Os08g0541600;Os02g0477300;Os04g0303250;Os01g0834200;Os02g0313500;Os12g0288000;Os05g0365700;Os03g0703200;Os02g0739700;Os08g0564200;Os09g0323100;Os11g0200950;Os11g0464700
osa-miR5522	Os07g0512100;Os02g0637800;Os01g0510901;Os02g0800500;Os11g0214001;Os09g0564800;Os11g0137400;Os02g0218550;Os08g0474700;Os04g0391000;Os09g0513800;Os07g0615200;Os04g0102700;Os03g0184700;Os12g0134300;Os09g0135501;Os04g0435475;Os07g0623000;Os02g0167700;Os09g0258500;Os03g0164400;Os11g0245466;Os04g0435200;Os08g0191433;Os04g0435325;Os10g0341101;Os01g0950833;Os07g0666300;Os04g0165801
osa-miR166c-3p	Os02g0729300;Os03g0109400;Os03g0651201;Os03g0640800;Os04g0571600;Os10g0480200;Os02g0222000;Os02g0676400;Os12g0267900;Os07g0515200;Os09g0415050;Os03g0164901;Os12g0612700;Os07g0581366;Os01g0909600;Os04g0298501
osa-miR818e	Os06g0580100;Os06g0695800;Os07g0572100;Os10g0571200;Os09g0260900;Os12g0616000;Os04g0667100;Os09g0109800;Os04g0451200;Os06g0148000;Os03g0376350;Os01g0186400;Os01g0651200;Os05g0480000;Os01g0785700;Os02g0652100;Os06g0287500;Os01g0107000;Os03g0363500;Os01g0274601;Os01g0824600;Os07g0471683;Os03g0777600;Os01g0805975;Os12g0264500;Os10g0104300;Os02g0130200;Os08g0483200;Os07g0489950;Os08g0176633;Os11g0199…
osa-miR166d-3p	Os02g0729300;Os03g0651201;Os03g0109400;Os12g0267900;Os02g0222000;Os02g0676400;Os04g0571600;Os10g0480200;Os03g0640800;Os07g0515200;Os09g0415050;Os12g0612700;Os03g0164901;Os04g0298501;Os07g0581366;Os01g0909600
Novel_1_1802	Os06g0494701;Os06g0216966;Os06g0241100;Os01g0825900;Os01g0553901;Os10g0370400;Os05g0580600;Os06g0235200;Os06g0656500;Os09g0414600;Os07g0474700;Os03g0125650;Os02g0727966;Os06g0136201;Os12g0104250;Os03g0641500;Os04g0253601;Os02g0141201;Os05g0453700
Novel_4_18326	Os05g0300700;Os02g0715225;Os01g0220900;Os08g0227900;Os07g0650200;Os05g0420200
osa-miR166k-5p	Os08g0564200;Os10g0377300;Os07g0179700;Os08g0494300;Os06g0116100;Os03g0325500;Os08g0149566;Os04g0115200;Os11g0539000;Os01g0280600;Os07g0626300;Os07g0442800;Os09g0572450;Os01g0775100;Os10g0372800;Os04g0442200;Os03g0271400;Os02g0116800;Os03g0835800;Os06g0543601;Os03g0188900;Os09g0309700;Os08g0557500;Os07g0155600;Os01g0707500;Os05g0333600;Os06g0712700;Os10g0456900
osa-miR156d	Os06g0703500;Os02g0695050;Os02g0687550;Os01g0974800;Os11g0209300;Os07g0191200;Os06g0724800;Os11g0151500;Os08g0531600;Os01g0814900;Os01g0166400;Os09g0513100;Os11g0114600;Os07g0615900;Os10g0539650;Os09g0507100;Os07g0571100;Os06g0644600;Os08g0128200;Os09g0472000;Os06g0251700;Os04g0414300;Os02g0139400;Os11g0597400;Os03g0355600;Os10g0578800;Os06g0554800;Os02g0161500;Os08g0404300;Os07g0267200;Os01g0829…
Novel_3_11260	Os11g0658800;Os09g0339601
Novel_5_22006	Os01g0938100;Os08g0101000;Os03g0612600;Os08g0471300;Os03g0296300;Os12g0580950;Os08g0544800;Os05g0239350;Os12g0209000;Os06g0503400;Os06g0682666;Os02g0116750;Os09g0398300;Os01g0970700;Os02g0189300;Os02g0608801;Os07g0188700;Os11g0284032;Os05g0302300;Os05g0564100;Os06g0318300;Os03g0413000;Os09g0281900;Os09g0480600;Os07g0495150;Os08g0282100;Os07g0448100;Os12g0124500;Os08g0512500;Os07g0584100;Os03g0191…
osa-miR5150-5p	Os05g0540900;Os05g0346100;Os03g0848250;Os02g0186400;Os12g0613300;Os04g0648500;Os01g0222500;Os10g0422000
osa-miR319b	Os10g0524400;Os05g0368350;Os01g0358551;Os01g0871300;Os01g0222001;Os05g0102600;Os04g0131500;Os01g0213800;Os01g0507000;Os09g0339300;Os06g0674800;Os02g0534550;Os05g0490600;Os10g0561300;Os07g0152000;Os12g0616400;Os04g0555000;Os11g0694125;Os03g0783800;Os01g0812000;Os06g0605600;Os12g0222800;Os03g0785800;Os01g0755500;Os12g0541500
Novel_7_30321	Os12g0615700
Novel_7_28999	Os01g0314100;Os04g0226340
osa-miR11344-5p	Os12g0245100;Os08g0373400;Os08g0562866;Os12g0621000;Os01g0627916;Os06g0145400;Os11g0684700;Os07g0185700;Os08g0529000
Novel_10_40779	Os04g0178300;Os03g0227601;Os04g0324550;Os01g0900750;Os12g0542601;Os01g0949700;Os08g0206650;Os09g0511900;Os07g0542701;Os04g0313600;Os02g0121600;Os01g0153150;Os09g0380450;Os09g0399502;Os01g0863166;Os01g0812600;Os12g0264500;Os11g0547000;Os07g0169100
osa-miR5802	Os07g0248900
osa-miR395l	Os09g0567900;Os02g0190000;Os03g0743900;Os10g0115600;Os06g0486000;Os02g0190300;Os08g0367400;Os11g0668100;Os10g0502600;Os03g0731500;Os04g0367000;Os03g0195500;Os04g0650300;Os06g0556451;Os03g0195300;Os02g0272900;Os07g0590700;Os02g0620800;Os04g0585400;Os07g0496000;Os04g0665800;Os03g0330000;Os01g0346400
osa-miR167c-5p	Os04g0671900;Os12g0613700;Os06g0526800;Os06g0334300;Os03g0211800;Os02g0611250;Os06g0698785;Os02g0681100;Os08g0120200;Os04g0682300;Os05g0108300;Os09g0567700;Os01g0192550;Os01g0265800;Os11g0162000;Os01g0276800;Os01g0852200;Os06g0129100;Os06g0677800;Os09g0327600;Os02g0742700;Os06g0269200;Os03g0674700;Os07g0522600;Os03g0161950;Os06g0118900;Os02g0708300;Os02g0164900;Os02g0211350;Os10g0476300;Os01g0971…
Novel_6_27868	Os06g0418151;Os07g0141500;Os01g0814700;Os01g0366501;Os09g0491780;Os02g0644100;Os03g0283900;Os12g0181500;Os04g0112766;Os10g0480200;Os07g0583600;Os04g0667400;Os11g0481150;Os08g0556700;Os03g0248600;Os01g0207400;Os04g0463300;Os01g0745700;Os08g0336700;Os05g0474600;Os06g0289200;Os10g0463300;Os01g0857900;Os05g0164000;Os08g0231100;Os11g0106550;Os08g0482300;Os02g0820900;Os09g0120100;Os03g0389175;Os02g0540…
osa-miR1862e	Os05g0131000;Os02g0188201;Os04g0556500;Os12g0583801;Os04g0380300;Os08g0486266;Os03g0649275;Os08g0421000
Novel_7_29708	Os01g0136700;Os03g0328300;Os06g0311700;Os02g0577600;Os09g0383000;Os05g0390932
osa-miR159e	Os11g0659400;Os02g0671950;Os03g0578900;Os08g0558800;Os03g0756200;Os01g0213800;Os02g0111600;Os01g0212500;Os07g0100500;Os08g0137225;Os11g0117700;Os06g0679400;Os02g0166800;Os11g0591100;Os03g0230500;Os03g0785800;Os03g0242100;Os05g0108100;Os06g0605600;Os01g0812000;Os03g0783800;Os12g0566100;Os07g0152000;Os05g0490600;Os08g0558000
osa-miR172a	Os03g0784000;Os06g0700000;Os02g0809900;Os09g0452900;Os11g0128500;Os11g0431700;Os10g0506800;Os12g0123800;Os01g0580100;Os11g0653300;Os05g0121600;Os03g0680200;Os04g0636700;Os09g0386500;Os09g0339800;Os09g0125900;Os03g0818800;Os04g0662000;Os11g0282900;Os03g0297100;Os01g0703800;Os02g0123450;Os06g0639200;Os03g0427100;Os01g0916800;Os10g0151800;Os02g0525400;Os03g0401100;Os02g0803300;Os04g0175900;Os02g0146…
osa-miR1863b	Os05g0553800;Os08g0197950;Os02g0552700;Os02g0293300;Os11g0567900
osa-miR5513	Os01g0233800;Os02g0754800;Os11g0226700;Os11g0597700;Os05g0587400;Os02g0504800;Os02g0742800;Os06g0364850;Os05g0474600;Os01g0614900;Os01g0826900;Os01g0977600;Os01g0852900;Os02g0808601;Os10g0420800;Os06g0245700;Os09g0447500;Os04g0619000;Os01g0724500;Os08g0107800;Os01g0180600;Os03g0355800;Os08g0491200;Os06g0329200;Os06g0532301;Os12g0180100;Os07g0174766;Os03g0837100;Os01g0814400;Os11g0474000
osa-miR5504	Os12g0566400;Os05g0161700;Os06g0145400;Os01g0734800;Os02g0752250;Os07g0118300;Os11g0171601;Os10g0395150;Os04g0290000;Os12g0169950;Os03g0726300;Os10g0333000;Os06g0640599;Os03g0271500;Os04g0531600;Os12g0459300;Os02g0156100;Os08g0557100;Os07g0578600;Os11g0455800;Os02g0656300;Os04g0160801
Novel_2_10516	Os07g0542701;Os01g0307624;Os08g0162066;Os10g0543500;Os01g0805975;Os08g0437050;Os01g0691000;Os11g0197725;Os05g0571400;Os03g0641500;Os05g0343800;Os01g0728000;Os04g0360500;Os02g0727966;Os12g0122400;Os04g0370100;Os07g0471050;Os09g0572700;Os02g0612700;Os01g0728900;Os06g0618300;Os03g0727000;Os02g0141201;Os07g0616100
osa-miR812a	Os10g0134250;Os12g0126600;Os12g0545600;Os10g0160600;Os06g0176100;Os12g0138000;Os02g0176100;Os03g0227400;Os03g0339900;Os06g0673300;Os04g0413200;Os01g0274901;Os01g0608900;Os06g0187050;Os02g0771600;Os06g0681600;Os06g0715400;Os03g0439900;Os01g0882000;Os12g0583801;Os11g0199000;Os05g0227901;Os09g0333600;Os01g0387865;Os08g0434566;Os06g0610350;Os07g0151650;Os12g0243050;Os09g0109800;Os06g0578100;Os03g0714…
osa-miR396b-5p	Os03g0431550;Os01g0180800;Os07g0631000;Os11g0680200;Os01g0510800;Os03g0694900;Os03g0639700;Os01g0698300;Os09g0468000;Os04g0442000;Os07g0294100;Os07g0455100;Os01g0271400;Os11g0565400;Os06g0474900;Os01g0187900;Os04g0609900;Os02g0710500;Os01g0560000;Os08g0190300;Os11g0303500;Os04g0577600;Os04g0354400;Os06g0174375;Os01g0762000;Os02g0678800;Os08g0513300;Os07g0122900;Os07g0160050;Os11g0139500;Os01g0309…
Novel_11_42619	Os02g0247000
osa-miR395g	Os02g0272900;Os03g0195300;Os06g0556451;Os02g0620800;Os04g0585400;Os07g0590700;Os03g0330000;Os04g0665800;Os07g0496000;Os01g0346400;Os03g0743900;Os02g0190000;Os09g0567900;Os11g0668100;Os02g0190300;Os08g0367400;Os06g0486000;Os10g0115600;Os04g0367000;Os10g0502600;Os03g0731500;Os04g0650300;Os03g0195500
osa-miR397a	Os08g0453700;Os01g0634500;Os01g0842400;Os03g0760700;Os03g0607400;Os09g0509200;Os04g0413200;Os05g0458600;Os10g0139500;Os12g0467300;Os01g0894075;Os02g0195500;Os03g0808100;Os01g0612700;Os11g0258700;Os01g0850800;Os07g0495300;Os01g0885700;Os03g0273200;Os01g0969200;Os05g0458500;Os11g0103150;Os01g0744550;Os02g0103600;Os12g0102800;Os06g0224200;Os11g0539800;Os04g0639000;Os01g0842500;Os02g0551100;Os10g0138…
osa-miR6246	Os02g0754000;Os02g0715200;Os11g0173800
osa-miR5083	Os07g0301200;Os02g0155900;Os03g0140650;Os10g0571100;Os11g0209600;Os01g0974800;Os02g0467400;Os03g0573600;Os02g0481000;Os01g0716400;Os03g0698800;Os02g0773800;Os12g0575000;Os02g0552400;Os04g0194800;Os11g0605500;Os04g0136802;Os01g0764500;Os10g0485000;Os02g0155600;Os09g0433000;Os05g0498200;Os05g0487600;Os10g0541700;Os09g0248000;Os02g0329600;Os01g0279500;Os04g0672200;Os01g0231700;Os08g0202300;Os05g0343…
osa-miR1437b-3p	Os05g0108400;Os09g0567300;Os10g0555300;Os05g0151300;Os02g0586900;Os03g0145102
osa-miR812r	Os12g0126600;Os11g0199000
Novel_10_40682	Os10g0341101;Os10g0159300;Os07g0202900;Os04g0488200;Os11g0427401;Os09g0130300
osa-miR159a.2	Os11g0222560;Os03g0113500;Os02g0767100;Os03g0191000;Os03g0353900;Os02g0282100;Os04g0600300;Os02g0700400;Os02g0730700;Os10g0516500;Os01g0828200;Os12g0615300;Os02g0786500;Os05g0271900;Os05g0583950;Os05g0104650;Os10g0343000;Os10g0413900;Os11g0169100;Os06g0185700;Os03g0401200;Os12g0614851;Os06g0300200;Os10g0558600
osa-miR6254	Os08g0129700;Os06g0494100;Os03g0835400;Os11g0265900;Os01g0665250;Os07g0206700;Os02g0686400;Os07g0511400;Os03g0294650;Os02g0437800;Os07g0147800;Os07g0663300;Os01g0809300;Os04g0632500;Os02g0272900;Os12g0140600
osa-miR11336-5p	Os04g0290450;Os02g0264700;Os07g0189800;Os07g0169100;Os08g0530100;Os11g0470966;Os01g0392800;Os10g0476900;Os01g0667100;Os03g0425300;Os08g0501700;Os08g0494400;Os11g0635000;Os01g0243800;Os09g0447300;Os02g0769200;Os03g0332201;Os02g0152200;Os12g0292200;Os03g0237600;Os06g0274500;Os12g0568350;Os03g0410300;Os06g0230000;Os03g0229575;Os03g0255200;Os05g0114950;Os02g0176100;Os09g0572400;Os03g0668033;Os06g0644…
osa-miR395o	Os05g0355133;Os04g0367000;Os03g0195500;Os09g0473650;Os02g0190000;Os03g0182400;Os11g0640600;Os03g0743900;Os06g0486000;Os08g0367400;Os02g0190300;Os03g0330000;Os02g0608100;Os12g0511300;Os03g0243800;Os03g0597400;Os01g0605100;Os01g0346400;Os07g0269450;Os03g0615300;Os03g0195300;Os10g0208500;Os05g0435800;Os04g0585400;Os04g0614650
Novel_11_43732	Os09g0463600
osa-miR1863b.2	Os04g0450850;Os08g0235400;Os06g0605950
osa-miR393a	Os04g0395600;Os01g0229250;Os01g0580400;Os01g0102400;Os06g0188400;Os05g0528200;Os03g0310500;Os07g0613000;Os04g0684100;Os10g0112700;Os01g0522400;Os06g0142900;Os02g0558100;Os10g0545000;Os10g0180000;Os05g0150500;Os07g0685600;Os01g0109700;Os05g0203900;Os02g0157200;Os03g0559700
osa-miR6248	Os10g0389300;Os01g0213350;Os04g0688600;Os11g0427601;Os02g0592600;Os06g0660200;Os03g0216800;Os02g0526650;Os10g0493600;Os11g0635000;Os10g0556200;Os01g0562600;Os03g0116900;Os04g0219000;Os01g0963600;Os04g0275950;Os03g0817800;Os04g0526200;Os04g0394300;Os06g0274300;Os07g0608200;Os05g0389700;Os09g0364800;Os07g0553600;Os11g0119800;Os12g0438400;Os12g0125500;Os01g0188200;Os10g0558900;Os06g0309000;Os02g0184…
Novel_2_10762	Os04g0116600;Os06g0109000;Os06g0352200;Os06g0303800;Os06g0176300;Os08g0527800;Os01g0910200;Os06g0716600;Os12g0571900;Os01g0530400;Os06g0340200;Os03g0577800;Os09g0442800;Os09g0271000;Os05g0255800;Os07g0601900;Os04g0196200;Os05g0512200;Os11g0227700;Os01g0391600;Os06g0532301;Os04g0432200;Os03g0348800;Os12g0207200;Os01g0593500;Os03g0748750;Os04g0446000;Os05g0126700;Os08g0485800;Os07g0466300;Os05g0172…
osa-miR169p	Os10g0343100;Os03g0700800;Os06g0491800;Os09g0491780;Os12g0297400;Os06g0538000
osa-miR395i	Os08g0367400;Os02g0190300;Os11g0668100;Os10g0115600;Os06g0486000;Os03g0743900;Os09g0567900;Os02g0190000;Os04g0650300;Os03g0195500;Os04g0367000;Os10g0502600;Os03g0731500;Os07g0590700;Os02g0620800;Os04g0585400;Os03g0195300;Os02g0272900;Os06g0556451;Os01g0346400;Os03g0330000;Os07g0496000;Os04g0665800
Novel_6_28179	Os12g0562500;Os02g0672500;Os07g0191500;Os05g0121400;Os11g0569800;Os01g0684301;Os06g0172000
Novel_11_43509	Os12g0609000;Os03g0257600;Os05g0515400
osa-miR5151	Os03g0289100;Os01g0337160;Os08g0484600;Os02g0632150;Os01g0702400
osa-miR5490	Os03g0194450;Os03g0107600;Os04g0608900;Os07g0569000;Os03g0157400;Os05g0182150;Os04g0570800;Os04g0132500;Os07g0434700;Os11g0264200;Os06g0585982;Os09g0529100;Os01g0369600;Os04g0473900;Os11g0136500;Os07g0677400;Os02g0437901;Os07g0627000;Os01g0106700;Os02g0179250;Os03g0622500;Os01g0152000;Os04g0692700;Os01g0115700;Os06g0621800;Os08g0437050
Novel_12_45703	Os03g0363900;Os02g0590700;Os02g0325401;Os07g0123700;Os01g0921100;Os03g0161000;Os06g0301300;Os05g0323100;Os12g0204600;Os03g0278000
osa-miR5801b	Os10g0528900;Os01g0623600;Os09g0485600;Os04g0621900;Os08g0537200
osa-miR5539a	Os01g0594500;Os07g0667350;Os08g0206700;Os07g0694800;Os10g0317300
Novel_3_10889	Os01g0111300;Os06g0270950;Os03g0807000
osa-miR1882e-3p	Os03g0110700
osa-miR160f-5p	Os09g0392700;Os06g0703800;Os03g0107700;Os04g0519700;Os02g0628600;Os04g0690600;Os11g0106083;Os05g0222200;Os09g0466800;Os08g0494200;Os12g0197500;Os05g0166900;Os12g0569500;Os10g0479900;Os06g0314000;Os09g0407950;Os06g0685700
osa-miR812f	Os02g0176100;Os06g0681600;Os06g0176100;Os02g0771600;Os09g0260900;Os12g0243050;Os06g0177200;Os05g0227901;Os09g0333600;Os01g0274901;Os04g0558700;Os12g0126600;Os01g0882000;Os03g0714400
osa-miR167e-3p	Os03g0279400;Os03g0698350;Os05g0398000;Os09g0567400;Os01g0148400;Os02g0510000;Os01g0809450;Os08g0162300;Os02g0830801;Os12g0515300;Os02g0795100;Os02g0433600;Os01g0777800;Os01g0558800;Os11g0551900;Os01g0251200;Os03g0425300;Os11g0303200;Os03g0161950;Os08g0224200;Os04g0454600;Os04g0455401;Os05g0185767
Novel_1_4628	Os11g0133100;Os01g0138400;Os05g0107300;Os04g0626300;Os01g0787300;Os04g0423600;Os12g0461050;Os08g0388300;Os05g0380700;Os10g0402200;Os05g0380300;Os04g0654500;Os01g0282251;Os09g0260900;Os12g0102500;Os04g0480400;Os05g0379500;Os02g0298200;Os09g0472000;Os11g0676200;Os03g0225500;Os10g0548400;Os11g0112650;Os12g0564750;Os12g0244000;Os12g0138700;Os11g0102900;Os12g0483450;Os07g0230500;Os02g0114150;Os11g0435…
osa-miR812g	Os06g0715400;Os11g0550300;Os12g0583801;Os01g0274901;Os04g0558700;Os06g0177200;Os04g0436900;Os02g0771600;Os06g0187050;Os06g0681600;Os11g0441900;Os03g0714400;Os12g0126600;Os05g0227901;Os09g0333600;Os09g0260900;Os12g0243050;Os02g0176100;Os06g0176100
osa-miR2873a	Os02g0155400
Novel_10_39151	Os04g0493300;Os02g0202800;Os02g0771666;Os11g0232100;Os01g0513200;Os04g0573900;Os09g0413600;Os03g0421250;Os01g0925300;Os04g0666800;Os03g0641500;Os03g0683700;Os09g0344400;Os02g0240100;Os01g0155300;Os07g0130450;Os12g0146625;Os11g0117900;Os11g0681400;Os10g0109066;Os10g0162300;Os07g0545500;Os03g0619600;Os01g0766400;Os01g0226666;Os05g0458500;Os03g0857400;Os05g0550200;Os08g0524501;Os10g0437550;Os07g0160…
Novel_12_47723	Os10g0406701;Os04g0333300
Novel_9_38286	Os02g0141201;Os03g0705550;Os06g0216966;Os02g0237801;Os07g0474700;Os06g0205250;Os09g0414600;Os12g0138800;Os06g0350700;Os06g0136201;Os02g0727966
osa-miR1861o	Os09g0499600;Os07g0603300;Os11g0170400;Os01g0852500;Os06g0667000;Os01g0600300;Os06g0210000;Os11g0244900;Os02g0608200;Os06g0706600;Os01g0584250;Os09g0460250;Os06g0527100;Os06g0705200;Os07g0299600;Os03g0741900
Novel_6_24490	Os11g0472000;Os05g0504800;Os01g0516600;Os11g0131800
Novel_6_25505	Os11g0629300;Os10g0485600;Os06g0573600
Novel_3_11153	Os05g0185767;Os06g0559600;Os02g0528550;Os11g0233201;Os01g0311600;Os05g0267100;Os08g0403733
Novel_12_47077	Os02g0795000;Os04g0284500;Os12g0104300;Os04g0684100;Os07g0493400;Os04g0576800
osa-miR5149	Os04g0629100;Os07g0631700;Os03g0789600;Os12g0114100;Os03g0381300;Os02g0767150;Os06g0211300;Os09g0549450;Os02g0180700;Os12g0169000;Os04g0682850;Os05g0126400;Os08g0557700;Os03g0289300;Os04g0531400;Os03g0739700
Novel_8_32985	Os10g0528900;Os09g0485600
osa-miR166g-3p	Os02g0729300;Os12g0612700;Os03g0109400;Os03g0651201;Os04g0298501;Os02g0676400;Os03g0640800;Os04g0571600;Os01g0909600;Os10g0480200;Os07g0515200
osa-miR171a	Os05g0396900;Os08g0377400;Os10g0551200;Os02g0663100;Os05g0443900;Os04g0555000;Os02g0810300;Os03g0135550;Os08g0387200;Os08g0548500;Os12g0270300;Os02g0662700;Os02g0302900;Os06g0105350
Novel_10_39424	Os01g0159000;Os12g0632700;Os05g0113000;Os05g0485850;Os04g0348400;Os01g0839200;Os03g0270200;Os12g0613600;Os07g0557500;Os09g0572250;Os04g0372800;Os11g0176200;Os01g0746400;Os04g0369066;Os07g0271500;Os04g0478000;Os07g0526400;Os07g0647900;Os04g0435700;Os10g0323500;Os01g0237750;Os06g0679500;Os06g0699500
osa-miR160a-5p	Os10g0479900;Os06g0685700;Os12g0569500;Os11g0175300;Os12g0197500;Os02g0165200;Os08g0494200;Os07g0515200;Os03g0227601;Os02g0628600;Os04g0690600;Os11g0106083;Os09g0466800;Os07g0218832;Os04g0519700;Os09g0392700;Os03g0107700
Novel_8_33800	Os08g0373000;Os10g0528900;Os06g0273300;Os05g0558400;Os01g0623600;Os01g0549200;Os09g0397200;Os08g0537200;Os09g0494600;Os03g0239200;Os11g0615900;Os04g0531700;Os09g0485600;Os01g0768600;Os12g0544600;Os10g0415600;Os10g0549500;Os08g0448100;Os08g0529000
osa-miR156g-3p	Os05g0405500;Os07g0229700;Os06g0324000;Os07g0447800;Os03g0750000;Os12g0210400;Os01g0121950;Os07g0515200;Os01g0142500;Os10g0479900;Os12g0105300;Os12g0511400;Os03g0365200;Os02g0723200;Os03g0727000;Os07g0603500;Os09g0492700;Os04g0388900;Os02g0667600;Os03g0647600;Os01g0355900;Os11g0592550;Os06g0567666;Os03g0815900;Os10g0476000;Os02g0712400;Os03g0860050;Os11g0105750;Os08g0242800;Os05g0586050
osa-miR408-3p	Os01g0768200;Os10g0397400;Os01g0705000;Os11g0176200;Os07g0476200;Os12g0182100;Os04g0587751;Os10g0559800;Os09g0446275;Os01g0126100;Os06g0266400;Os04g0535600;Os03g0436400;Os09g0365300;Os10g0350500;Os01g0576000;Os03g0166800;Os01g0349400;Os06g0611150;Os04g0197100;Os01g0973550;Os05g0151000;Os01g0378100;Os01g0576050;Os03g0773000;Os08g0337601;Os08g0482700;Os02g0598200;Os03g0297900;Os02g0272100;Os01g0827…
osa-miR395w	Os11g0706100;Os12g0570700;Os03g0800400;Os10g0426100;Os12g0497544;Os03g0195300;Os06g0592951;Os01g0346400;Os10g0134033;Os08g0367400;Os09g0429400;Os03g0726900;Os11g0640600;Os01g0757400;Os10g0502600;Os04g0367000
Novel_9_37805	Os08g0411800;Os02g0727300;Os01g0553600
Novel_3_13687	Os07g0122000
osa-miR2873b	Os12g0169100;Os08g0192200;Os07g0452500;Os01g0838400;Os10g0155700;Os01g0533900;Os05g0106700;Os03g0159700;Os10g0494200;Os03g0747850;Os08g0368333;Os08g0519800;Os09g0320400;Os04g0382550;Os03g0145102;Os01g0635800;Os02g0773200;Os02g0540000;Os11g0191300;Os11g0569733;Os09g0568000;Os03g0701000;Os12g0236100;Os06g0659300;Os07g0518500;Os02g0566300;Os03g0861800;Os06g0109801
Novel_7_31585	Os07g0685600;Os08g0113800;Os08g0435800;Os02g0702300;Os01g0372700;Os12g0209502;Os05g0451900;Os08g0254600;Os09g0428600;Os03g0323200;Os03g0130700;Os10g0408700;Os08g0276200;Os07g0656500;Os08g0489300;Os01g0769700;Os01g0607000;Os02g0755400;Os04g0644750;Os02g0702400;Os06g0618100;Os01g0974500;Os08g0425100;Os09g0547000;Os04g0659900;Os10g0105850;Os09g0327300;Os03g0831100;Os05g0238200;Os04g0472300;Os04g0506…
osa-miR390-5p	Os12g0107733;Os06g0340200;Os05g0519700;Os06g0180300;Os02g0194400;Os01g0162300;Os01g0933400;Os03g0179400;Os05g0399800;Os04g0553000;Os06g0692700;Os03g0107850;Os08g0485600;Os04g0368000;Os01g0847300;Os05g0566700;Os01g0515300;Os03g0773050;Os11g0569300;Os01g0561500;Os08g0203600;Os06g0130100;Os11g0180300;Os06g0148600;Os06g0669400;Os03g0836600;Os02g0609900;Os04g0683600;Os04g0534166;Os08g0446400;Os08g0332…
Novel_4_18876	Os04g0110500
osa-miR2118a	Os02g0650900;Os06g0235000;Os01g0786800;Os04g0435300;Os01g0149350;Os01g0308300;Os01g0149500;Os05g0206200;Os05g0414200;Os04g0375300
Novel_11_42535	Os01g0542100;Os08g0227900
Novel_1_5145	Os07g0148600;Os03g0396900
Novel_7_31587	Os11g0131800;Os01g0516600;Os05g0504800;Os11g0472000
osa-miR156c-5p	Os09g0566400;Os11g0141800;Os04g0681600;Os03g0561400;Os03g0735400;Os05g0305900;Os09g0491532;Os11g0496600;Os02g0445200;Os04g0411300;Os01g0657100;Os05g0143600;Os09g0382000;Os04g0653000;Os08g0509600;Os04g0681400;Os08g0437050;Os07g0505200;Os07g0456700;Os03g0412300;Os01g0140100;Os02g0752300;Os12g0441600;Os06g0229800;Os05g0562200;Os01g0513950;Os04g0117900;Os02g0554100;Os02g0100300;Os05g0480700;Os09g0439…
osa-miR1847.1	Os05g0432400;Os01g0123700;Os03g0128200;Os01g0850700;Os06g0693700;Os01g0720600;Os03g0407400;Os04g0150300;Os09g0556200;Os04g0476650;Os07g0587200;Os10g0561500;Os08g0436000;Os10g0456900;Os02g0788500;Os03g0744675;Os04g0120350;Os09g0442400;Os03g0750000;Os05g0202800;Os11g0218200;Os03g0321700;Os03g0737800;Os11g0539700;Os07g0685300;Os05g0533600;Os02g0562400;Os10g0419200;Os05g0346800;Os07g0679300;Os09g0421…
osa-miR164c	Os07g0218600;Os05g0162350;Os02g0436400;Os12g0610600;Os04g0625000;Os08g0250900;Os10g0571100;Os08g0200600;Os02g0154600;Os08g0202300;Os10g0409900;Os07g0586550;Os06g0675600;Os02g0677800;Os04g0528651;Os06g0344900;Os02g0663300;Os09g0549400;Os06g0575400;Os11g0673100;Os09g0559150;Os03g0644200;Os02g0579000;Os12g0147800;Os06g0157000;Os06g0710700;Os01g0844900;Os11g0638700;Os01g0128000;Os02g0778700;Os03g0163…
osa-miR166l-5p	Os03g0607600;Os08g0477800;Os04g0349700;Os03g0202001;Os04g0275100;Os09g0571400;Os02g0153500;Os11g0462950;Os04g0405800;Os06g0617800;Os07g0252400;Os04g0474700;Os01g0300200;Os03g0581200;Os02g0778300;Os02g0197800;Os10g0375000;Os02g0195800
Novel_12_48044	Os03g0668033;Os01g0884200;Os01g0116300
Novel_2_10432	Os02g0188201
osa-miR812h	Os03g0714400;Os11g0441900;Os06g0176100;Os02g0176100;Os12g0243050;Os09g0260900;Os05g0227901;Os09g0333600;Os12g0126600;Os12g0583801;Os11g0550300;Os06g0715400;Os06g0681600;Os06g0187050;Os02g0771600;Os04g0436900;Os06g0177200;Os04g0558700;Os01g0274901
osa-miR164f	Os08g0511800;Os05g0195700;Os02g0666300;Os10g0494400;Os01g0851400;Os03g0791700;Os04g0460600;Os10g0478000;Os06g0607700;Os01g0625300;Os03g0307500;Os03g0424200;Os03g0644200;Os09g0559150;Os02g0579000;Os11g0673100;Os08g0331800;Os06g0157000;Os06g0710700;Os12g0147800;Os06g0526600;Os03g0747300;Os01g0844900;Os03g0573500;Os02g0778700;Os01g0842500;Os03g0163000;Os06g0527500;Os03g0590700;Os01g0128000;Os01g0572…
Novel_5_21500	Os01g0519400;Os01g0220900
osa-miR2103	Os07g0556066;Os08g0524000;Os06g0607100;Os06g0256800;Os11g0150700;Os01g0976950;Os06g0643050;Os09g0241200;Os12g0597300;Os03g0744675;Os07g0548500;Os05g0180400;Os03g0606100;Os10g0414800;Os12g0118400;Os11g0157400;Os03g0276500;Os05g0451900;Os04g0379933;Os06g0605750;Os03g0244700;Os12g0558400;Os05g0269100;Os04g0652500;Os09g0520700;Os06g0608350;Os02g0776600;Os07g0637050;Os04g0447950;Os06g0675200;Os04g0589…
osa-miR1858a	Os09g0509000;Os03g0770700;Os03g0206700;Os08g0463900;Os05g0353400;Os10g0494000;Os06g0196700;Os02g0205700;Os03g0105800;Os02g0726000;Os06g0134050;Os02g0570700;Os01g0571766;Os08g0323700;Os04g0634400;Os07g0236200;Os03g0807000;Os01g0950300;Os06g0667400;Os04g0570000;Os05g0292200;Os01g0956200;Os03g0720800;Os08g0115800;Os08g0464950;Os01g0723200;Os01g0189700;Os02g0833300;Os05g0510400;Os03g0326100;Os06g0644…
osa-miR1320-5p	Os12g0616800;Os05g0549000;Os05g0590201;Os12g0242800;Os01g0109201;Os01g0747400;Os06g0281400;Os01g0735500;Os06g0200250;Os01g0897500;Os09g0249100;Os01g0860400;Os04g0572800;Os01g0753500;Os12g0528300;Os09g0572400;Os06g0644466;Os11g0184800;Os05g0172000;Os07g0602000;Os01g0785700;Os02g0215100;Os05g0191500;Os02g0141201;Os04g0402250;Os01g0877001;Os03g0138100;Os05g0573600;Os11g0227700;Os08g0472600;Os09g0384…
osa-miR5337b	Os02g0101500;Os08g0553000;Os02g0191000;Os06g0130100;Os01g0102500;Os08g0552000;Os08g0553400;Os01g0848700;Os08g0552100;Os04g0689400;Os01g0382700;Os07g0537300;Os04g0440100;Os12g0191601;Os11g0235300;Os08g0552400;Os05g0418901;Os09g0542100;Os08g0553300;Os01g0254900;Os02g0159100
osa-miR812v	Os04g0436900;Os02g0771600;Os12g0243050;Os02g0176100;Os06g0237100;Os04g0558700;Os09g0333600;Os10g0498100;Os03g0268400;Os02g0526650;Os11g0199000;Os09g0426100;Os12g0209502;Os07g0649200;Os07g0160100
Novel_1_3044	Os01g0817650;Os12g0605100;Os07g0214100;Os02g0650500;Os01g0230200;Os10g0370000;Os01g0140100;Os12g0126300;Os11g0202900;Os06g0695700;Os10g0503250;Os02g0805800;Os10g0420200;Os07g0681600;Os07g0134101;Os03g0842900;Os03g0145150;Os09g0492900;Os05g0380900;Os12g0626150;Os10g0577100;Os01g0233900;Os10g0531900;Os03g0603200;Os03g0267000;Os05g0186900;Os11g0481500;Os06g0245800;Os09g0348766;Os12g0286200;Os01g0855…
osa-miR1850.1	Os01g0835000;Os03g0685000;Os01g0616366;Os03g0680600;Os10g0181900;Os04g0397800;Os07g0686900;Os05g0456800;Os12g0122400;Os09g0517825;Os01g0709750;Os07g0539300;Os01g0226450;Os06g0136300;Os12g0133700;Os06g0629362;Os04g0662850;Os11g0646300;Os06g0274100;Os06g0113950;Os08g0141700;Os04g0191000;Os04g0348400;Os01g0787600;Os08g0162066;Os02g0145500;Os01g0799050;Os03g0299700;Os04g0488100;Os11g0414000;Os09g0133…
Novel_7_31810	Os09g0400400;Os06g0271900;Os05g0418901
Novel_2_9827	Os03g0570775;Os01g0765300;Os12g0604600;Os02g0179900;Os01g0867800;Os02g0244700;Os04g0661800;Os09g0471600;Os09g0469400;Os08g0195900;Os01g0832900;Os10g0138300
osa-miR7695-3p	Os12g0641300;Os03g0566800;Os01g0240600;Os06g0705651;Os01g0184200;Os01g0890300;Os04g0606200;Os11g0448000;Os03g0626700
Novel_4_16641	Os01g0111300;Os06g0270950;Os03g0807000
Novel_5_21442	Os06g0674000;Os10g0210500;Os01g0686100;Os12g0543701;Os02g0612700;Os11g0474450;Os12g0570400;Os03g0393700;Os02g0778900;Os05g0362000;Os12g0292200;Os04g0436400
Novel_3_12548	Os06g0610300;Os09g0414600;Os03g0388300;Os01g0645650;Os10g0143800
osa-miR395m	Os03g0195300;Os02g0272900;Os06g0556451;Os07g0590700;Os04g0585400;Os02g0620800;Os03g0330000;Os07g0496000;Os04g0665800;Os01g0346400;Os03g0743900;Os09g0567900;Os02g0190000;Os08g0367400;Os02g0190300;Os11g0668100;Os10g0115600;Os06g0486000;Os04g0367000;Os10g0502600;Os03g0731500;Os04g0650300;Os03g0195500
osa-miR1320-3p	Os01g0612350;Os12g0242800;Os06g0280900;Os06g0200250;Os03g0174600;Os01g0645650;Os02g0785600;Os07g0148800;Os01g0106500;Os06g0191200;Os11g0691050;Os08g0447300;Os08g0290000;Os12g0176500;Os03g0448500;Os12g0116000;Os11g0569300;Os09g0392400;Os01g0568800;Os02g0478050;Os09g0345300;Os12g0142600;Os11g0595100;Os08g0143700;Os08g0511900;Os05g0460800;Os04g0557500;Os03g0761700;Os01g0254800;Os11g0116550
osa-miR1856	Os09g0255800;Os09g0274900
osa-miR159a.1	Os03g0756200;Os01g0507000;Os12g0210400;Os06g0143900;Os02g0671950;Os03g0578900;Os01g0665200;Os01g0212500;Os11g0569600;Os09g0541900;Os05g0501800;Os03g0683866;Os06g0360500;Os06g0247651;Os01g0874900;Os04g0469700;Os05g0527200;Os05g0358700;Os11g0153400;Os07g0551750;Os03g0331700;Os09g0442000;Os05g0490600;Os06g0605600;Os01g0812000;Os09g0538700;Os03g0796400
Novel_3_10914	Os04g0615000;Os11g0169800;Os10g0315400;Os07g0419000;Os08g0421000;Os06g0474800;Os02g0556400;Os10g0358200;Os12g0640600;Os10g0135833;Os03g0240500;Os12g0235800;Os01g0582600;Os02g0539900;Os01g0904200;Os01g0285300;Os04g0550300;Os05g0109600
osa-miR5816	Os07g0224550;Os11g0626700;Os10g0427700;Os01g0366501
osa-miR1871	Os05g0114100;Os06g0300200;Os12g0517800;Os11g0617532;Os01g0380800;Os06g0561501;Os07g0445600;Os05g0204900;Os12g0168700
osa-miR812j	Os06g0187050;Os02g0771600;Os04g0436900;Os06g0681600;Os04g0558700;Os01g0274901;Os06g0177200;Os12g0583801;Os06g0715400;Os11g0550300;Os12g0243050;Os09g0260900;Os06g0176100;Os02g0176100;Os12g0126600;Os09g0333600;Os05g0227901;Os11g0441900;Os03g0714400
osa-miR820c	Os05g0447250;Os12g0176700;Os03g0757200;Os06g0126100;Os04g0691200;Os09g0404700;Os09g0406000;Os09g0406100;Os09g0405200;Os11g0127000;Os09g0406300;Os06g0134000;Os11g0455500;Os02g0186900;Os11g0255300;Os01g0773000;Os05g0485800;Os09g0404400;Os09g0405300;Os06g0578700;Os04g0563950;Os09g0404800;Os01g0872566;Os09g0404500;Os07g0623000;Os03g0128800;Os04g0690800;Os06g0610350;Os09g0405900;Os07g0553600;Os03g0110…
Novel_3_14692	Os03g0179200
osa-miR398a	Os10g0197700;Os10g0328600;Os12g0264650;Os01g0916400;Os07g0665200;Os02g0543200;Os07g0679000;Os05g0346200;Os05g0463600;Os10g0567200;Os07g0436350;Os01g0205200
osa-miR166a-3p	Os04g0298501;Os01g0909600;Os07g0581366;Os12g0612700;Os03g0164901;Os12g0267900;Os02g0222000;Os02g0676400;Os04g0571600;Os10g0480200;Os03g0640800;Os07g0515200;Os09g0415050;Os02g0729300;Os03g0651201;Os03g0109400
osa-miR399k	Os01g0228901;Os08g0266400;Os05g0191500;Os05g0529700;Os11g0674400;Os11g0673600;Os01g0106700;Os02g0215950;Os11g0197600;Os02g0751100;Os05g0557700
Novel_4_18729	Os05g0185700
osa-miR167d-5p	Os07g0681500;Os05g0143300;Os02g0164900;Os03g0789466;Os02g0211350;Os12g0169400;Os01g0971900;Os01g0192550;Os09g0567700;Os06g0129100;Os06g0677800;Os07g0481400;Os07g0195200;Os07g0207700;Os12g0613700;Os01g0972000;Os07g0161500;Os03g0831000;Os04g0671900;Os09g0327600;Os02g0742700;Os03g0211800;Os07g0522600;Os07g0293000;Os06g0334300;Os03g0674700;Os03g0161950;Os08g0246300;Os05g0108300;Os02g0708300;Os08g0120…
osa-miR2867-5p	Os02g0462401;Os03g0826000;Os07g0656800;Os12g0431300;Os04g0103100;Os02g0438601;Os07g0436100;Os09g0122000
osa-miR393b-3p	Os02g0101000;Os02g0677700;Os01g0170600;Os03g0166800;Os11g0209300;Os11g0522900;Os03g0719800;Os10g0370100;Os08g0198700;Os06g0224900;Os01g0229200;Os03g0190300;Os08g0128300;Os07g0106000;Os01g0172400;Os02g0713900;Os11g0462900;Os04g0684100;Os01g0121950;Os01g0932650;Os09g0509350
Novel_1_5117	Os02g0107900;Os07g0675400;Os02g0211000
Novel_2_7152	Os05g0188500;Os08g0169700
Novel_3_12617	Os08g0430050;Os05g0227901;Os12g0583500;Os12g0105800;Os01g0296900;Os11g0446000;Os09g0366500;Os07g0647800;Os06g0287500;Os10g0420800;Os08g0403733;Os04g0367000;Os10g0130500;Os07g0490300;Os10g0104300;Os02g0264700;Os10g0406701;Os12g0135000;Os04g0380300;Os12g0583801
osa-miR156e	Os01g0814900;Os08g0531600;Os01g0166400;Os11g0151500;Os09g0513100;Os06g0724800;Os02g0695050;Os02g0687550;Os07g0191200;Os01g0974800;Os11g0209300;Os06g0703500;Os03g0355600;Os11g0597400;Os10g0578800;Os04g0414300;Os02g0139400;Os08g0128200;Os09g0472000;Os06g0644600;Os06g0251700;Os11g0114600;Os07g0615900;Os07g0571100;Os10g0539650;Os09g0507100;Os06g0111600;Os05g0326400;Os01g0922600;Os12g0580900;Os09g0568…
osa-miR812i	Os12g0243050;Os09g0260900;Os06g0176100;Os02g0176100;Os12g0126600;Os09g0333600;Os05g0227901;Os11g0441900;Os03g0714400;Os06g0187050;Os04g0436900;Os02g0771600;Os06g0681600;Os04g0558700;Os01g0274901;Os06g0177200;Os12g0583801;Os06g0715400;Os11g0550300
osa-miR6245b-5p	Os03g0365700;Os01g0645650;Os12g0443101;Os01g0542100;Os10g0529600;Os08g0227900;Os02g0214050;Os08g0437050
osa-miR5079a	Os05g0364650;Os03g0429900;Os10g0577600;Os06g0494250;Os04g0607100;Os01g0586600;Os06g0297400;Os07g0160050
osa-miR815b	Os12g0568800;Os04g0173300;Os03g0614901;Os02g0228300;Os09g0242600;Os08g0511500;Os10g0198333;Os01g0875400;Os03g0829466;Os07g0662550;Os05g0185767;Os09g0563800;Os03g0163500;Os09g0357300;Os05g0362000;Os08g0107800;Os01g0231900;Os02g0616450;Os08g0398400;Os07g0507300;Os07g0238700;Os01g0523250;Os10g0390500;Os01g0609300;Os10g0381800;Os01g0818700;Os06g0315900;Os08g0542600;Os10g0161800;Os04g0221450;Os01g0258…
Novel_2_10642	Os06g0579100;Os03g0798000;Os09g0123500;Os07g0508200;Os02g0179250;Os06g0676400;Os02g0833200;Os10g0498000;Os06g0286310;Os06g0200700;Os10g0406701;Os05g0172000;Os03g0683900;Os06g0136201;Os01g0841050;Os05g0131000;Os08g0483200;Os01g0715800;Os03g0170400;Os11g0116000;Os03g0421100;Os01g0296900;Os03g0734000;Os02g0550800;Os01g0154950;Os08g0486266;Os05g0534500;Os01g0632100;Os05g0127200
Novel_10_38452	Os01g0651400
osa-miR166c-5p	Os01g0545500;Os02g0754500;Os08g0457100;Os07g0580200;Os01g0148700;Os01g0706100;Os01g0838100;Os04g0455900;Os08g0433100;Os06g0102700;Os01g0909300;Os10g0489800;Os03g0823100;Os03g0281100;Os05g0437900;Os10g0517050;Os05g0551000;Os04g0542200;Os01g0531400;Os10g0177400;Os07g0437500;Os03g0278250;Os04g0563050;Os01g0162200;Os08g0161950;Os12g0163200;Os07g0607300;Os08g0401800;Os01g0212100;Os08g0247600;Os12g0406…
osa-miR5538	Os04g0346100;Os01g0844800;Os09g0549450;Os02g0817000;Os04g0613800;Os09g0484200;Os04g0570800;Os09g0544800;Os06g0645100;Os07g0490200
osa-miR166i-5p	Os01g0588600;Os04g0692850;Os04g0435500;Os02g0746000;Os10g0495600;Os07g0425000;Os02g0502500;Os01g0595900;Os01g0607900;Os12g0177200;Os02g0817050;Os08g0380100;Os05g0460600;Os11g0475000;Os01g0626900;Os12g0485600;Os03g0651201;Os05g0574800;Os01g0744300;Os11g0546100;Os07g0669500;Os02g0152200;Os06g0705000
osa-miR5821	Os07g0573600;Os01g0951400;Os04g0227100;Os08g0436400;Os01g0951200;Os11g0303800;Os02g0110600;Os03g0126600;Os01g0901300;Os02g0791800;Os01g0540000;Os10g0337700;Os05g0243300;Os09g0531100;Os02g0697300;Os03g0857500;Os04g0373000;Os02g0480200;Os07g0504601;Os09g0363800;Os06g0527100;Os10g0208500;Os04g0482100;Os02g0796700;Os09g0441000;Os04g0689300;Os02g0463401;Os01g0225700;Os08g0493100;Os01g0248800;Os05g0546…
Novel_5_20836	Os04g0558700;Os06g0177200;Os02g0656200;Os06g0140200;Os09g0511900;Os04g0693050;Os11g0550300;Os03g0268400;Os02g0526650;Os04g0324550;Os07g0151650;Os08g0434566;Os06g0610350;Os09g0333600;Os01g0387865;Os04g0385650;Os12g0243050;Os05g0167300;Os09g0109800;Os03g0714400;Os11g0606001;Os11g0475000;Os01g0694500;Os01g0274901;Os04g0313600;Os01g0608900;Os02g0121600;Os02g0771600;Os06g0187050;Os01g0882000;Os07g0173…
Novel_5_22833	Os01g0182832
Novel_5_22433	Os11g0578033;Os04g0197350;Os02g0297000;Os09g0389000;Os08g0253150
osa-miR5537	Os04g0693200;Os03g0262900;Os05g0503300;Os03g0773600;Os12g0145400;Os03g0442800;Os04g0649200;Os08g0402800;Os11g0148200;Os10g0447600;Os06g0589750;Os01g0935350
osa-miR6249a	Os01g0808400;Os02g0770500;Os09g0559100;Os09g0385300;Os08g0434100;Os02g0612700;Os01g0361700;Os05g0521900;Os08g0124000;Os06g0545900;Os04g0480200;Os06g0590800;Os01g0221100;Os05g0250866;Os10g0407000;Os06g0548500;Os07g0619500;Os06g0604200;Os06g0126250;Os07g0211200;Os02g0620500;Os03g0133500;Os08g0205300;Os07g0550750;Os01g0267100;Os06g0486000;Os12g0586100;Os04g0680000;Os10g0126600;Os01g0639600;Os10g0548…
Novel_1_4618	Os11g0606001;Os04g0253601;Os02g0141201;Os02g0727966;Os06g0136201;Os09g0414600;Os07g0474700;Os03g0125650;Os02g0730800;Os05g0580600;Os06g0235200;Os06g0656500;Os09g0251450;Os06g0216966;Os01g0825900;Os06g0241100;Os09g0448100;Os02g0536601;Os06g0494701;Os02g0100150;Os06g0205250;Os12g0138800
osa-miR167e-5p	Os02g0164900;Os07g0681500;Os05g0143300;Os03g0789466;Os02g0211350;Os12g0169400;Os01g0971900;Os09g0567700;Os01g0192550;Os06g0129100;Os06g0677800;Os07g0481400;Os07g0195200;Os07g0207700;Os12g0613700;Os01g0972000;Os07g0161500;Os03g0831000;Os04g0671900;Os09g0327600;Os02g0742700;Os03g0211800;Os07g0293000;Os07g0522600;Os03g0674700;Os06g0334300;Os08g0246300;Os03g0161950;Os05g0108300;Os02g0708300;Os08g0120…
Novel_7_29208	Os05g0185700
Novel_11_43459	Os04g0486950;Os07g0511301;Os08g0355400;Os03g0238700;Os03g0570775;Os01g0765300;Os06g0104000;Os09g0306232;Os08g0518300;Os10g0530800;Os12g0607100;Os04g0223000;Os11g0415450;Os07g0257400;Os02g0244700;Os03g0402200;Os01g0564600;Os01g0802850;Os05g0386000;Os06g0330100
osa-miR820b	Os04g0563950;Os01g0872566;Os09g0404800;Os07g0623000;Os03g0128800;Os09g0404500;Os09g0405900;Os06g0610350;Os04g0690800;Os09g0406200;Os09g0404300;Os03g0110800;Os07g0553600;Os01g0756700;Os03g0263300;Os02g0612800;Os03g0255100;Os12g0482500;Os01g0675800;Os09g0405001;Os06g0349750;Os07g0105900;Os12g0176700;Os05g0447250;Os06g0126100;Os03g0757200;Os04g0691200;Os09g0404700;Os09g0406000;Os11g0127000;Os09g0405…
osa-miR1432-5p	Os04g0436100;Os01g0647100;Os11g0155500;Os12g0156866;Os03g0295700;Os02g0628100;Os12g0631200;Os09g0361300;Os12g0470000;Os07g0626200;Os01g0170700;Os08g0517200;Os11g0474400;Os05g0164800;Os07g0578333;Os05g0105600;Os03g0145050;Os07g0107800;Os03g0812400;Os03g0812800;Os04g0605500;Os01g0977600;Os10g0521900;Os12g0140700
Novel_3_10973	Os05g0128100;Os01g0393300;Os10g0561300;Os09g0433000;Os08g0502800;Os01g0503400;Os01g0617700;Os05g0397300;Os04g0221450;CAA33995;Os08g0171700;Os12g0542000;Os11g0194050;Os12g0620733
osa-miR2905	Os03g0307900;Os12g0615400;Os06g0234600;Os01g0827600;Os01g0740700;Os05g0358000;Os10g0116000;Os06g0713800;Os04g0203300;Os01g0144340;Os01g0878400;Os01g0736551;Os08g0532600;Os08g0170400;Os10g0498100;Os06g0592200;Os09g0474501;Os01g0877600;Os05g0505692;Os02g0738300;Os02g0284500;Os05g0479900;Os03g0226200;Os01g0341200;Os06g0688800;Os08g0434100;Os06g0353400;Os07g0605800;Os01g0819233;Os02g0714200;Os03g0679…
Novel_3_15614	Os03g0268000
Novel_2_8058	Os12g0570400;Os02g0612700;Os03g0393700;Os07g0438700;Os07g0133700;Os12g0543701;Os01g0686100;Os02g0662900;Os06g0674000;Os10g0210500;Os12g0292200;Os05g0362000
Novel_3_12808	Os04g0450900;Os01g0837900;Os05g0552000;Os01g0134500;Os02g0164300;Os07g0527000;Os05g0250600;Os09g0368400;Os12g0633501;Os07g0585900;Os03g0296600;Os01g0750800;Os10g0574700;Os01g0137300;Os05g0427200;Os05g0253700;Os12g0170400;Os01g0780600;Os08g0490300;Os06g0556150;Os03g0125900;Os12g0256300;Os04g0470801;Os02g0802200;Os05g0250700;Os03g0794900
osa-miR2880	Os12g0615200
osa-miR395j	Os10g0115600;Os06g0486000;Os02g0190300;Os08g0367400;Os11g0668100;Os09g0567900;Os02g0190000;Os03g0743900;Os03g0195500;Os04g0650300;Os10g0502600;Os03g0731500;Os04g0367000;Os07g0590700;Os04g0585400;Os02g0620800;Os06g0556451;Os02g0272900;Os03g0195300;Os01g0346400;Os07g0496000;Os04g0665800;Os03g0330000
Novel_11_44472	Os11g0186050
osa-miR171e-5p	Os07g0217800;Os02g0608200;Os02g0742200;Os04g0555151;Os06g0234200;Os03g0135550;Os08g0536100;Os04g0693000;Os01g0153150;Os04g0484800;Os01g0865800;Os10g0508900
Novel_10_38535	Os04g0470600;Os04g0461000;Os10g0547900;Os03g0388600;Os03g0113500;Os01g0660900;Os05g0543600;Os05g0500950;Os03g0242900;Os03g0754800
osa-miR1862a	Os03g0649275;Os08g0421000;Os08g0498600;Os05g0215000;Os07g0466200;Os02g0589600;Os08g0486266;Os09g0366500;Os02g0179250;Os06g0574100;Os07g0629900;Os01g0715800;Os02g0617100;Os07g0562800
Novel_2_9625	Os10g0406701
osa-miR528-3p	Os01g0147400;Os02g0733166;Os06g0717200;Os12g0438400;Os02g0197400;Os05g0592000;Os12g0299650;Os03g0659400;Os05g0133100;Os02g0178000;Os02g0132100;Os07g0218600;Os05g0302300;Os05g0490200;Os08g0178900;Os11g0435301;Os03g0152000;Os12g0265201;Os05g0218001;Os06g0323100;Os05g0542100;Os05g0147500;Os01g0549300;Os12g0603300;Os04g0422950;Os03g0591300;Os01g0186700;Os01g0894050;Os01g0897100;Os01g0919600;Os06g0481…
osa-miR5815	Os04g0375300
Novel_1_937	Os11g0591400;Os06g0474800;Os05g0180300;Os07g0492100;Os05g0241100;Os01g0213350;Os10g0142100;Os04g0432500;Os11g0683500;Os04g0550300;Os06g0206100;Os10g0496900;Os01g0505400;Os03g0784000
osa-miR6255	Os06g0259000;Os06g0629362;Os09g0566600;Os06g0590600;Os01g0906000;Os11g0688200;Os05g0515200;Os04g0227100
osa-miR1861h	Os09g0499600;Os07g0171300;Os06g0117500;Os05g0596600;Os06g0119300;Os06g0645901;Os12g0145700;Os11g0431100;Os11g0148500
Novel_4_17232	Os04g0524950;Os09g0530200
osa-miR395s	Os03g0330000;Os07g0496000;Os04g0665800;Os01g0346400;Os03g0195300;Os02g0272900;Os06g0556451;Os07g0590700;Os02g0620800;Os04g0585400;Os04g0367000;Os03g0731500;Os10g0502600;Os04g0650300;Os03g0195500;Os03g0743900;Os09g0567900;Os02g0190000;Os02g0190300;Os08g0367400;Os11g0668100;Os10g0115600;Os06g0486000
osa-miR5079b	Os06g0494250;Os10g0577600;Os03g0429900;Os05g0364650;Os07g0160050;Os06g0297400;Os01g0586600;Os04g0607100
osa-miR2865	Os05g0496200;Os05g0590550;Os08g0447100;Os08g0532600;Os10g0536900;Os02g0699500
osa-miR810b.2	Os01g0361800;Os03g0212400;Os04g0620400;Os12g0607000;Os10g0315400;Os01g0750600;Os07g0668200;Os12g0115900;Os11g0116400;Os06g0491566;Os07g0191700;Os08g0139700;Os04g0111500;Os03g0367000
osa-miR2878-5p	Os07g0179000
osa-miR319a-5p	Os07g0513200;Os08g0460600;Os12g0605200;Os07g0631500;Os10g0503100;Os06g0214900;Os09g0541900;Os04g0612600;Os05g0452900;Os05g0132500;Os01g0566900;Os01g0650200
osa-miR1319a	Os04g0296700;Os01g0542100;Os10g0529600;Os03g0365700;Os11g0697001;Os01g0569800;Os08g0413850
Novel_8_33227	Os01g0159800
Novel_3_11958	Os08g0423400;Os02g0648900;Os01g0620400
osa-miR1846d-5p	Os09g0528050;Os04g0647900;Os09g0432900;Os04g0568700;Os01g0874700;Os03g0672500
osa-miR1425-5p	Os02g0682500;Os01g0392800;Os01g0513900;Os03g0746400;Os01g0827600;Os11g0544300;Os04g0555400;Os01g0527900;Os02g0785600;Os10g0499500;Os07g0210100;Os05g0485300;Os10g0501700;Os10g0495200;Os01g0690800;Os08g0565700;Os01g0690600;Os07g0495250;Os12g0503000;Os06g0521000;Os10g0495100;Os08g0517200;Os08g0110200;Os08g0176633;Os03g0572925;Os10g0544950;Os08g0107800;Os04g0619000;Os10g0495400;Os10g0167600;Os10g0497…
Novel_2_7938	Os02g0671950
osa-miR169f.2	Os04g0599400;Os01g0228500;Os07g0177100;Os07g0227200;Os07g0656500;Os02g0238500;Os08g0285100;Os01g0659900;Os10g0148800;Os01g0142500;Os11g0514700;Os11g0224600;Os04g0670600;Os10g0534100;Os02g0726500;Os07g0577300;Os08g0538700;Os03g0636600;Os06g0574400;Os04g0636300;Os04g0131800;Os01g0851100;Os08g0536150;Os01g0279200
osa-miR390-3p	Os06g0635200;Os04g0464850;Os10g0444700;Os11g0205500;Os08g0107300;Os07g0490400;Os06g0703800;Os06g0158800;Os04g0213100;Os11g0258900;Os05g0415700;Os01g0232400;Os07g0436100;Os10g0369950;Os06g0565900;Os08g0180400;Os02g0548100;Os04g0197350;Os10g0529700;Os01g0862000;Os01g0750600;Os06g0704450;Os02g0550000;Os04g0367000;Os09g0442900;Os08g0153750;Os03g0192750;Os05g0488500
osa-miR2118n	Os02g0543200;Os08g0265300;Os01g0149500;Os01g0149350;Os02g0572400;Os01g0798900;Os08g0479400;Os01g0786800;Os06g0619600;Os04g0435300;Os12g0543701;Os05g0414200;Os09g0497900;Os12g0511600;Os01g0308300;Os04g0375300;Os10g0161400;Os03g0113800;Os08g0539700
Novel_1_3013	Os05g0133900;Os01g0918400;Os01g0126200
Novel_9_37861	Os05g0362000;Os12g0292200;Os04g0436400;Os06g0674000;Os10g0210500;Os03g0659350;Os01g0686100;Os12g0543701;Os11g0474450;Os12g0570400;Os05g0541800;Os02g0612700;Os03g0393700
Novel_5_22643	Os01g0230700
Novel_4_19525	Os01g0111300
Novel_8_33882	Os01g0161300
Novel_11_44328	Os11g0215400;Os08g0562700;Os09g0453700;Os01g0215750;Os07g0693900;Os07g0109500;Os02g0531200;Os01g0898400;Os11g0579300;Os02g0806900;Os06g0565000;Os01g0918200;Os04g0647900;Os11g0286500;Os06g0621500;Os02g0161500;Os01g0752800;Os11g0598200;Os02g0548900;Os07g0524100;Os01g0684900;Os02g0325401;Os11g0107450;Os07g0626500;Os01g0673800;Os11g0611100;Os03g0278000;Os09g0526200;Os06g0729300;Os06g0286375;Os09g0247…
osa-miR5500	Os07g0687300;Os05g0521450;Os01g0116000;Os12g0128800;Os01g0872100;Os04g0551200;Os12g0272800;Os01g0872000;Os09g0551900;Os11g0616900;Os03g0712900;Os02g0780800;Os03g0795000;Os12g0273300;Os08g0197300;Os02g0153450
osa-miR395h	Os10g0115600;Os06g0486000;Os08g0367400;Os02g0190300;Os11g0668100;Os09g0567900;Os02g0190000;Os03g0743900;Os03g0195500;Os04g0650300;Os10g0502600;Os03g0731500;Os04g0367000;Os07g0590700;Os02g0620800;Os04g0585400;Os06g0556451;Os02g0272900;Os03g0195300;Os01g0346400;Os07g0496000;Os04g0665800;Os03g0330000
Novel_7_30565	Os08g0227900;Os01g0542100
osa-miR2118p	Os04g0375300;Os10g0161400;Os12g0511600;Os01g0308300;Os02g0256100;Os12g0577000;Os05g0414200;Os03g0110700;Os09g0489500;Os01g0149350;Os04g0111900;Os11g0212000;Os01g0149500;Os08g0265300;Os01g0786800;Os04g0435300;Os01g0798900
Novel_11_43833	Os07g0404300;Os03g0570775
osa-miR2864.1	Os04g0613400;Os08g0248400;Os02g0771700;Os03g0860700;Os01g0823600;Os12g0129550;Os07g0506000;Os12g0511300;Os02g0142450;Os06g0200700;Os07g0606900;Os11g0104300;Os01g0926350;Os05g0299600;Os10g0178800;Os09g0246300;Os11g0587600;Os05g0250200;Os04g0623100;Os02g0802575;Os05g0155000;Os03g0636800;Os04g0379700;Os03g0757500;Os07g0593000;Os06g0698802;Os03g0207300;Os01g0914200;Os01g0907900;Os09g0298100;Os03g0213…
osa-miR2121b	Os02g0517333;Os03g0712600;Os03g0219800;Os01g0339600;Os02g0179250;Os01g0390900;Os02g0630650;Os07g0191900;Os02g0741700;Os06g0552400;Os01g0709750;Os06g0675900;Os10g0134250;Os01g0326100;Os12g0288266;Os11g0146950
Novel_4_15975	Os11g0199000;Os03g0268400;Os02g0771600;Os03g0339900;Os07g0160100;Os12g0614201;Os04g0558700
osa-miR11341-5p	Os04g0250050;Os04g0309500
Novel_7_30123	Os09g0333600;Os06g0306500;Os04g0558700;Os01g0274901;Os06g0681600;Os06g0237100;Os02g0771600;Os04g0436900;Os07g0649200;Os04g0294401;Os01g0882000
Novel_10_39401	Os11g0153200;Os03g0854500;Os09g0271000
Novel_1_574	Os10g0477301;Os04g0354400;Os12g0292200;Os06g0673300;Os02g0152200;Os06g0177600;Os06g0644200;Os03g0668033;Os02g0176100;Os03g0229575;Os12g0126600;Os07g0537200;Os06g0693600;Os02g0280700;Os06g0284200;Os02g0612700;Os10g0399901;Os06g0675900;Os11g0599100;Os07g0468500;Os04g0290450;Os04g0446000;Os01g0274901;Os12g0639800;Os03g0237600;Os05g0512200;Os11g0227700;Os01g0391600;Os02g0141201;Os04g0402250;Os03g0103…
osa-miR812n-5p	Os01g0274901;Os04g0558700;Os09g0333600;Os02g0771600;Os06g0237100;Os02g0176100;Os06g0681600;Os04g0675400;Os12g0209502;Os03g0714400;Os01g0882000;Os04g0413200;Os04g0294401
Novel_1_3759	Os08g0256750;Os10g0350200
Novel_11_42172	Os07g0448100;Os06g0235800;Os08g0512500;Os07g0584100;Os10g0567500;Os03g0362500;Os04g0481400;Os11g0180600;Os07g0486500;Os03g0676400;Os07g0495150;Os09g0480600;Os06g0503400;Os01g0296166;Os04g0543000;Os02g0189300;Os07g0188700;Os01g0873200;Os10g0551900;Os03g0612600;Os08g0544800;Os10g0552200;Os04g0681950;Os03g0452300;Os07g0577600;Os03g0661800;Os12g0170500;Os04g0351333;Os03g0788250;Os10g0552300;Os02g0252…
osa-miR5807	Os03g0855100
Novel_3_15794	Os03g0570775;Os10g0130800
Novel_2_8739	Os12g0615700
Novel_11_44361	Os11g0605900;Os01g0136700;Os03g0116900;Os01g0787600;Os09g0419100;Os06g0559600;Os03g0376350;Os07g0471050;Os05g0548300;Os01g0274901
Novel_2_10439	Os12g0615700
osa-miR2876-3p	Os10g0471400;Os03g0752700;Os04g0249500;Os02g0279150;Os01g0728900;Os12g0181900;Os04g0411300;Os01g0137700;Os01g0867900;Os12g0160500;Os06g0563300;Os02g0614800;Os10g0358200;Os02g0644900;Os09g0296900;Os03g0704200;Os04g0309600;Os10g0154600;Os06g0300366;Os03g0378200
Novel_9_38182	Os07g0159700
osa-miR167i-5p	Os01g0192550;Os01g0971900;Os09g0567700;Os12g0169400;Os07g0207700;Os07g0195200;Os06g0677800;Os07g0481400;Os06g0129100;Os03g0789466;Os07g0681500;Os05g0143300;Os02g0164900;Os02g0211350;Os06g0334300;Os03g0674700;Os07g0522600;Os07g0293000;Os03g0211800;Os08g0120200;Os02g0708300;Os05g0108300;Os03g0161950;Os08g0246300;Os04g0671900;Os09g0327600;Os03g0831000;Os07g0161500;Os01g0972000;Os12g0613700;Os02g0742…
osa-miR160e-5p	Os04g0519700;Os03g0107700;Os07g0248100;Os11g0106083;Os04g0690600;Os11g0689650;Os02g0628600;Os05g0115500;Os09g0466800;Os10g0103500;Os02g0602100;Os04g0464500;Os11g0245500;Os02g0557200;Os04g0665700;Os06g0526100;Os10g0479900;Os06g0685700
osa-miR1423-3p	Os04g0268300;Os09g0275200;Os01g0829600;Os08g0234700;Os12g0126100;Os12g0553800;Os04g0298700;Os07g0688300;Os04g0532200;Os09g0535200;Os07g0679100;Os03g0828600
Novel_5_20250	Os02g0244700;Os07g0615400;Os03g0119966;Os03g0570775;Os03g0711800;Os11g0689300;Os08g0254600;Os02g0593700;Os06g0207000;Os09g0471600;Os08g0524200
Novel_1_2402	Os03g0306400;Os01g0513200;Os10g0420800;Os07g0489950;Os06g0262501;Os08g0207600;Os01g0908001;Os03g0170400;Os03g0756200;Os01g0296900;Os01g0202500;Os07g0471683;Os06g0256600;Os09g0283200;Os01g0264400;Os10g0130500;Os09g0392666;Os02g0522300;Os06g0698748;Os01g0785700;Os09g0260900;Os12g0616000;Os02g0773700;Os03g0734000;Os11g0501000;Os07g0616750;Os04g0526200;Os03g0817800;Os10g0406701;Os12g0615500;Os06g0580…
osa-miR168a-5p	Os03g0770775;Os05g0554800;Os03g0612450;Os03g0687000;Os09g0115400;Os04g0249550;Os05g0161500;Os02g0831600;Os03g0124000;Os05g0574600;Os01g0706332;Os04g0566500;Os11g0580000;Os10g0163340;Os02g0672200;Os02g0188201;Os01g0956300;Os02g0665000;Os10g0508600;Os04g0105100;Os02g0129700;Os01g0306100
osa-miR164d	Os06g0344900;Os09g0457532;Os09g0549400;Os08g0434150;Os02g0740300;Os06g0675600;Os06g0718400;Os02g0287800;Os03g0687800;Os02g0154600;Os02g0185350;Os08g0200600;Os03g0825700;Os03g0100020;Os01g0868200;Os12g0199800;Os08g0250900;Os05g0589500;Os09g0401550;Os03g0625966;Os12g0610600;Os07g0280600;Os02g0436400;Os04g0625000;Os11g0114300;Os03g0173900;Os03g0185000;Os06g0721800;Os12g0230133;Os01g0823100;Os06g0109…
osa-miR1429-5p	Os06g0325602;Os05g0247400;Os02g0286891;Os01g0344620;Os02g0201300;Os09g0239450;Os03g0365900;Os11g0637501;Os06g0708000;Os08g0270000;Os08g0373000;Os03g0738101;Os10g0404900;Os04g0200000;Os04g0280700;Os02g0210100;Os06g0250600;Os01g0645650;Os02g0284500;Os01g0137300;Os10g0118100;Os07g0578050;Os02g0216300;Os09g0267300
Novel_3_12855	Os01g0307624;Os12g0480300
osa-miR1863c	Os07g0649500;Os05g0456100;Os06g0127700;Os08g0157900;Os06g0605950
Novel_1_2061	Os03g0712600;Os03g0570775
Novel_9_36127	Os07g0160100;Os03g0185700;Os03g0339900;Os11g0199000;Os02g0526650;Os03g0268400
osa-miR156f-5p	Os10g0539650;Os09g0507100;Os07g0571100;Os07g0615900;Os11g0114600;Os06g0251700;Os06g0644600;Os08g0128200;Os09g0472000;Os02g0139400;Os04g0414300;Os10g0578800;Os11g0597400;Os03g0355600;Os06g0703500;Os11g0209300;Os01g0974800;Os07g0191200;Os02g0695050;Os02g0687550;Os06g0724800;Os09g0513100;Os11g0151500;Os01g0814900;Os01g0166400;Os08g0531600;Os01g0700100;Os08g0404200;Os02g0115650;Os06g0663500;Os01g0191…
osa-miR6256	Os06g0203600;Os03g0374600;Os04g0581000;Os08g0375900;Os04g0517350;Os07g0633100;Os03g0122300;Os09g0520800
osa-miR5526	Os02g0288600;Os02g0637700;Os05g0508900;Os04g0636400;Os02g0494600;Os06g0610350;Os03g0283800;Os02g0461900;Os07g0444650;Os04g0103900;Os05g0435500
Novel_1_881	Os02g0302200;Os02g0799600;Os04g0618700;Os10g0343400;Os05g0399700;Os05g0106900;Os04g0103100;Os03g0832850;Os11g0490800;Os06g0143750;Os05g0410200;Os07g0142200;Os03g0342100;Os01g0862500;Os01g0859500;Os01g0974400;Os11g0610900;Os09g0492800;Os02g0259100;Os07g0188800;Os08g0175300;Os01g0888300;Os05g0326400;Os05g0313700;Os04g0496300;Os05g0118700;Os06g0595800;Os03g0692300;Os03g0155900;Os03g0283650;Os07g0552…
Novel_11_43708	Os01g0195801;Os04g0674700;Os05g0590550
osa-miR5799	Os12g0583801;Os10g0458600;Os01g0608900;Os11g0550300;Os11g0441900
osa-miR11344-3p	Os05g0530400;Os01g0209200;Os02g0644700;Os06g0145400
Novel_1_2164	Os10g0350200;Os08g0256750
Novel_2_6796	Os08g0191300;Os08g0431700;Os01g0504950;Os06g0230801;Os12g0243050;Os10g0358150
osa-miR530-5p	Os03g0766900;Os02g0685600;Os12g0640900;Os04g0212200;Os03g0417833;Os08g0450700;Os12g0106300;Os04g0603200;Os06g0691800;Os07g0541500;Os01g0551800;Os06g0300500;Os02g0832800;Os01g0590700;Os08g0416000;Os05g0120900;Os10g0458300;Os10g0169200;Os07g0553900;Os11g0145400;Os12g0568350;Os06g0702000;Os07g0457400;Os07g0584200;Os08g0416400;Os05g0508800;Os02g0806600;Os08g0102000;Os09g0278300;Os07g0268800;Os01g0923…
osa-miR5503	Os01g0329075;Os04g0677400;Os02g0822500;Os03g0206300;CAA33932;Os11g0488500
osa-miR172b	Os03g0657100;Os06g0472350;Os01g0830200;Os04g0442000;Os05g0428100;Os07g0521500;Os02g0142250;Os02g0146500;Os10g0450000;Os08g0506700;Os01g0350900;Os10g0425400;Os02g0807100;Os04g0649100;Os03g0362200;Os05g0163400;Os08g0471900;Os02g0793900;Os12g0123800;Os05g0121600;Os11g0217500;Os04g0634500;Os11g0128500;Os10g0151800;Os03g0401100;Os02g0803300;Os05g0333500;Os03g0818800;Os09g0386500;Os03g0680200;Os04g0662…
Novel_1_589	Os09g0109800
Novel_2_8590	Os01g0904200;Os02g0539900;Os01g0285300;Os04g0550300;Os05g0109600;Os10g0135833;Os03g0240500;Os12g0235800;Os01g0582600;Os12g0640600;Os04g0615000;Os11g0169800;Os10g0315400;Os07g0419000;Os02g0556400;Os08g0421000;Os06g0474800;Os10g0358200
osa-miR396e-5p	Os11g0129700;Os04g0600900;Os04g0574500;Os07g0564100;Os01g0859600;Os02g0776900;Os07g0209800;Os05g0353400;Os07g0503300;Os01g0378100;Os02g0678800;Os11g0551900;Os04g0674500;Os04g0583700;Os06g0204800;Os06g0661800;Os09g0471800;Os02g0701300;Os02g0611650;Os12g0484900;Os09g0471600;Os06g0297600;Os03g0373300;Os12g0204800;Os04g0568800;Os08g0190300;Os11g0303500;Os02g0649700;Os03g0729500;Os12g0126300;Os04g0307…
osa-miR395r	Os04g0585400;Os02g0620800;Os07g0590700;Os06g0556451;Os02g0272900;Os03g0195300;Os01g0346400;Os04g0665800;Os07g0496000;Os03g0330000;Os06g0486000;Os10g0115600;Os11g0668100;Os02g0190300;Os08g0367400;Os02g0190000;Os09g0567900;Os03g0743900;Os03g0195500;Os04g0650300;Os03g0731500;Os10g0502600;Os04g0367000
Novel_6_25499	Os10g0317900;Os01g0967700;Os08g0457400;Os07g0145400;Os11g0263000;Os04g0333300;Os04g0509200;Os11g0207900;Os06g0131300
osa-miR5536	Os12g0154600;Os03g0143700;Os07g0207100;Os04g0614600;Os01g0876800;Os07g0628700;Os05g0516400;Os06g0320801;Os06g0300600;Os01g0934300;Os03g0376350;Os07g0170100;Os12g0141500;Os01g0652800;Os05g0546700;Os05g0437700;Os03g0684100;Os12g0154000
osa-miR3982-5p	Os03g0119500;Os03g0675600;Os03g0796501;Os04g0584500;Os04g0388000;Os10g0496600
osa-miR1436	Os06g0593800;Os05g0532500;Os07g0682600;Os02g0535300;Os10g0470100;Os06g0262501;Os06g0177600;Os03g0668033;Os08g0300200;Os03g0229575;Os06g0693600;Os12g0568350;Os02g0282000;Os12g0274450;Os10g0438500;Os08g0522300;Os12g0209502;Os06g0291500;Os09g0392666;Os08g0472600;Os09g0498000;Os11g0606001;Os03g0237600;Os11g0227700;Os01g0116300;Os01g0391600;Os12g0244800;Os12g0107500;Os03g0348800;Os09g0401000;Os06g0230…
Novel_9_36861	Os06g0271900;Os05g0418901;Os09g0400400
osa-miR2100-5p	Os04g0623300;Os07g0531600;Os04g0225400;Os08g0336500;Os03g0427100;Os05g0346300;Os05g0105000;Os01g0301300;Os05g0113400;Os07g0534300
osa-miR1879	Os04g0649051;Os02g0799400;Os03g0800050;Os09g0322600;Os03g0655000;Os05g0238000;Os01g0685100
Novel_12_47071	Os08g0256750;Os10g0350200
Novel_9_37481	Os06g0559600;Os04g0103400;Os09g0339601
Novel_8_32952	Os05g0477800;Os12g0570500
osa-miR2118o	Os06g0490700;Os03g0110700;Os04g0486600;Os04g0435300;Os04g0323500
osa-miR166k-3p	Os01g0682001;Os02g0729300;Os03g0109400;Os03g0651201;Os06g0367100;Os12g0612700;Os03g0640800;Os04g0571600;Os10g0480200;Os02g0222000;Os04g0298501;Os02g0676400;Os06g0212300;Os01g0191000
Novel_1_2613	Os04g0676700;Os02g0141201;Os05g0592600;Os01g0734466;Os06g0167500
Novel_11_43138	Os10g0513900;Os11g0236932;Os01g0740300
osa-miR5501	Os03g0286800;Os10g0101000;Os01g0761500;Os02g0197900;Os08g0508800;Os01g0885000;Os02g0250400;Os05g0362000;Os02g0771100;Os07g0439000;Os05g0392300;Os01g0879500;Os12g0211000;Os12g0123300;Os08g0315001;Os07g0492100
osa-miR812p	Os01g0694500;Os07g0649200;Os11g0441900;Os06g0176100;Os02g0176100;Os12g0243050;Os05g0227901;Os09g0333600;Os12g0583801;Os01g0882000;Os06g0715400;Os06g0681600;Os06g0187050;Os02g0771600;Os06g0177200;Os01g0274901
Novel_6_25572	Os12g0292200;Os05g0362000;Os02g0778900;Os04g0436400;Os01g0686100;Os10g0210500;Os06g0674000;Os03g0393700;Os11g0474450;Os02g0612700;Os12g0570400;Os12g0543701
Novel_10_41023	Os11g0472000;Os05g0504800;Os11g0131800;Os01g0516600;Os02g0144300
osa-miR1868	Os05g0458000
Novel_2_8034	Os04g0436400;Os12g0292200;Os02g0778900;Os05g0362000;Os02g0612700;Os11g0474450;Os12g0570400;Os03g0393700;Os12g0543701;Os01g0686100;Os06g0674000;Os10g0210500
Novel_11_42641	Os02g0484950;Os11g0373711;Os01g0543000;Os09g0449700;Os09g0397200;Os05g0194000;Os11g0438400;Os02g0627750;Os02g0459300;Os03g0425000;Os10g0468950;Os07g0129800;Os12g0260500;Os04g0162975;Os10g0426700;Os11g0540800;Os09g0489800;Os03g0101000;Os01g0566500;Os02g0526600;Os05g0424000;Os05g0151400;Os01g0302500;Os10g0517500;Os09g0261900;Os03g0436100;Os01g0103600;Os04g0432300
osa-miR1860-5p	Os03g0764450;Os10g0547400;Os02g0173100;Os08g0430050;Os08g0295300;Os03g0308200;Os03g0742850;Os12g0242900;Os03g0646200;Os05g0131000;Os02g0597000;Os03g0850600;Os06g0638300;Os01g0100400;Os02g0208500;Os12g0137000;Os04g0597000;Os06g0624700;Os12g0490000;Os07g0206900;Os03g0294200
osa-miR1427	Os06g0260500;Os03g0263500;Os07g0620600;Os12g0121300;Os04g0602700;Os01g0279100;Os02g0261000;Os02g0319800;Os10g0497100;Os06g0707300;Os07g0294800;Os01g0773800;Os04g0272400;Os11g0623200;Os01g0617600;Os04g0580350;Os04g0395600;Os06g0614000;Os01g0500825;Os05g0567400;Os03g0815800;Os12g0175800;Os08g0330301;Os01g0770100;Os04g0490000;Os01g0209800;Os02g0240300;Os01g0630200;Os05g0357200;Os02g0272200;Os03g0692…
Novel_3_13415	Os12g0604600;Os02g0179900;Os01g0867800;Os02g0244700;Os03g0570775;Os01g0765300;Os08g0195900;Os09g0469400;Os01g0832900;Os10g0138300;Os04g0661800;Os09g0471600
osa-miR166j-5p	Os05g0373700;Os02g0779200;Os02g0826675
osa-miR167a-3p	Os11g0692000;Os12g0562100;Os04g0683800;Os03g0711400;Os03g0845700;Os02g0566500;Os03g0797800;Os04g0354400;Os04g0512900;Os10g0397400;Os02g0581400;Os01g0191300;Os12g0500500;Os09g0546400;Os12g0511900;Os07g0273600;Os03g0797000
osa-miR7695-5p	Os04g0563350;Os01g0280200;Os09g0109150;Os09g0545051;Os07g0436700;Os08g0147001;Os02g0187100
Novel_5_23016	Os03g0152800;Os07g0615400;Os06g0135900;Os11g0213500
Novel_9_37362	Os01g0259600;Os03g0169100;Os06g0531200;Os11g0124900;Os12g0293100;Os02g0172300;Os02g0156633;Os06g0303400;Os06g0567200;Os02g0223850
osa-miR5824	Os03g0409100;Os02g0121600
Novel_7_31512	Os03g0185700
osa-miR5510	Os03g0691800;Os02g0681100;Os06g0651000;Os07g0601000;Os02g0117750;Os04g0433900;Os07g0601100;Os01g0704700;Os08g0368000;Os04g0682600;Os07g0507500;Os09g0551000;Os03g0753100
Novel_9_37699	Os11g0475600;Os08g0333500;Os02g0160200;Os08g0502700;Os01g0153150;Os03g0356400
Novel_5_22448	Os04g0115650;Os10g0437600
Novel_9_36966	Os11g0472000;Os05g0504800;Os01g0516600;Os02g0144300;Os11g0131800
Novel_8_33831	Os02g0457325
osa-miR1429-3p	Os07g0680800;Os02g0165200;Os06g0230000;Os06g0262501;Os03g0730400;Os03g0351700;Os08g0167000;Os03g0667400;Os09g0516200;Os11g0103400;Os11g0602200;Os01g0276500;Os03g0408500;Os08g0535400;Os08g0135800;Os06g0668250;Os01g0228800;Os08g0169100;Os09g0568050;Os03g0187550;Os01g0510800;Os05g0587700
osa-miR156f-3p	Os09g0516700;Os03g0365200;Os05g0149600;Os01g0142500;Os01g0121950;Os08g0491200;Os09g0420900;Os09g0564200;Os06g0115600;Os05g0316200;Os08g0105000;Os05g0586050;Os03g0860050;Os06g0104300;Os11g0592550;Os02g0272600;Os08g0375900
osa-miR1425-3p	Os01g0374501;Os11g0592500;Os02g0139000;Os08g0191700;Os02g0720700;Os09g0272600;Os01g0856900;Os02g0272400;Os03g0237900;Os03g0210400;Os02g0515200;Os05g0583400;Os01g0141300;Os05g0104700;Os09g0513800;Os08g0395300;Os02g0730300;Os09g0505300;Os09g0452900;Os01g0630101;Os01g0620400;Os08g0425500;Os05g0176400;Os01g0901550;Os03g0249200;Os06g0472400;Os11g0256900;Os06g0703900;Os06g0243801;Os03g0356638
osa-miR5150-3p	Os08g0481300;Os02g0777100;Os01g0224166;Os01g0927500;Os05g0592600;Os12g0239000;Os10g0134250;Os02g0796500;Os03g0216766;Os04g0627300;Os09g0383000;Os12g0621400;Os08g0336700;Os03g0259100;Os05g0541000;Os11g0117500;Os05g0592800;Os03g0635800;Os06g0559500
osa-miR5073	Os12g0422971;Os05g0272200;Os04g0416400;Os12g0580900;Os09g0332300;Os02g0621100
Novel_6_27794	Os11g0475000;Os11g0199000;Os03g0268400;Os10g0498100;Os02g0526650;Os03g0241900;Os03g0339900;Os07g0160100;Os01g0728300;Os02g0176100;Os02g0771600;Os12g0243050;Os07g0151650;Os04g0558700
Novel_12_46464	Os03g0177100;Os09g0357250;Os12g0615200
Novel_10_40865	Os11g0131800;Os02g0144300;Os07g0114000;Os01g0516600;Os05g0504800;Os11g0472000;Os10g0569500
Novel_6_27353	Os11g0263000
osa-miR5144-5p	Os07g0490400;Os02g0809900;Os02g0173500;Os06g0122600;Os04g0604000;Os05g0472300;Os11g0197725;Os07g0164500;Os12g0106900;Os03g0125650;Os07g0596900;Os01g0605400;Os12g0279000;Os05g0581800;Os11g0227300;Os08g0198100;Os05g0170700;Os09g0103400;Os11g0444000;Os01g0700900;Os10g0489500;Os01g0746200;Os04g0626600;Os08g0281600;Os05g0552500;Os05g0471116;Os04g0324000;Os01g0251100;Os12g0636200;Os04g0314201;Os04g0140…
osa-miR5794	Os02g0749150;Os03g0646300;Os04g0226340;Os07g0692900;Os01g0814300;Os04g0379500;Os04g0128300;Os01g0169500;Os05g0546700;Os12g0230133;Os04g0225400;Os02g0131050;Os07g0690300;Os08g0224200;Os03g0301800
Novel_5_22165	Os12g0609000;Os03g0257600;Os05g0515400
Novel_5_22567	Os11g0233201;Os02g0523650;Os05g0185767;Os07g0296000;Os11g0427401;Os11g0454800;Os06g0561501;Os09g0339601
Novel_5_20670	Os09g0387800;Os03g0607600;Os01g0603500
osa-miR166l-3p	Os02g0729300;Os01g0682001;Os06g0367100;Os12g0612700;Os03g0651201;Os03g0109400;Os06g0212300;Os02g0222000;Os04g0298501;Os02g0676400;Os04g0571600;Os10g0480200;Os03g0640800;Os01g0191000
Novel_8_33101	Os07g0638300;Os05g0568900;Os09g0555800;Os08g0489800;Os03g0218300;Os02g0138900;Os04g0661250;Os08g0484450;Os04g0594000;Os01g0626100;Os05g0295700;Os01g0603800;Os09g0456100;Os02g0582800;Os08g0246950;Os12g0635400;Os03g0264700;Os09g0411700;Os04g0649200;Os11g0526800;Os02g0194900;Os11g0210000;Os02g0715300;Os08g0433600;Os01g0359400;Os01g0152000;Os03g0270500;Os02g0139200
osa-miR1872	Os12g0539333;Os06g0683000;Os07g0130500
osa-miR11341-3p	Os01g0594600
Novel_8_34383	Os03g0257600;Os05g0515400;Os12g0609000
Novel_3_12682	Os01g0547500;Os04g0648750
Novel_9_37277	Os02g0149500;Os05g0331200;Os03g0168400;Os08g0204800;Os01g0189800;Os08g0119200;Os03g0790900;Os10g0559833;Os01g0881100;Os04g0582000;Os01g0890200;Os04g0365100;Os11g0700100;Os07g0495900;Os02g0794000;Os09g0106200;Os10g0482900;Os12g0109900;Os01g0938600;Os06g0683300;Os03g0134550;Os01g0207200;Os10g0474100;Os11g0125900;Os09g0514100;Os03g0588200;Os05g0521500;Os03g0596600;Os03g0376350;Os01g0890600;Os08g0113…
Novel_2_7770	Os12g0138800;Os06g0205250;Os06g0494701;Os02g0536601;Os01g0825900;Os06g0241100;Os06g0216966;Os06g0235200;Os06g0656500;Os05g0580600;Os03g0125650;Os07g0474700;Os09g0414600;Os06g0136201;Os02g0727966;Os05g0453700;Os02g0141201;Os04g0253601;Os11g0606001
osa-miR159c	Os07g0227750;Os08g0512801;Os01g0507000;Os11g0659400;Os01g0504950;Os11g0192500;Os03g0281300;Os03g0783800;Os04g0535600;Os01g0812000;Os06g0605600;Os11g0194400;Os01g0212500;Os08g0122800;Os12g0529800;Os12g0210400;Os08g0367400;Os03g0756200;Os08g0235600;Os03g0578900;Os11g0191800;Os02g0671950;Os03g0789466;Os05g0490600;Os07g0152000;Os03g0331700;Os03g0800200;Os03g0785800;Os09g0384601;Os11g0193800;Os11g0117…
osa-miR166b-5p	Os10g0548300;Os01g0746400;Os01g0701500;Os03g0347900;Os07g0288700;Os08g0433100;Os04g0455900;Os01g0909300;Os08g0254300;Os02g0622100;Os01g0117200;Os05g0433900;Os04g0563050;Os01g0220900;Os12g0163200;Os01g0211600
Novel_1_4151	Os01g0307624;Os04g0452100
osa-miR396a-5p	Os11g0551900;Os06g0286700;Os04g0583700;Os03g0569000;Os02g0701300;Os04g0350300;Os04g0650700;Os04g0600900;Os01g0175600;Os08g0406400;Os05g0592800;Os05g0266900;Os03g0729500;Os04g0307300;Os08g0553500;Os06g0474500;Os07g0109300;Os02g0570300;Os12g0136200;Os03g0674700;Os12g0484900;Os06g0297600;Os09g0329200;Os06g0694100;Os10g0420800;Os01g0737900;Os08g0513300;Os07g0122900;Os02g0678800;Os01g0762000;Os01g0309…
osa-miR1874-3p	Os06g0218300;Os02g0313500
osa-miR395a	Os03g0597400;Os04g0646000;Os07g0590700;Os03g0195300;Os05g0366800;Os03g0668400;Os03g0195500;Os01g0266000;Os10g0502600;Os06g0235850;Os02g0761300;Os05g0519200;Os04g0104900;Os07g0269450;Os07g0165200;Os05g0121800;Os01g0140400;Os03g0300900;Os08g0557900;Os05g0435800;Os03g0615300;Os04g0650300;Os09g0491100;Os06g0486000;Os02g0103600;Os10g0323000;Os10g0115600;Os06g0164400;Os04g0615700;Os03g0743900;Os09g0567…
osa-miR11339-5p	Os05g0141500;Os09g0128600;Os10g0541000;Os06g0353400;Os04g0382550;Os03g0410300;Os04g0610700;Os06g0274500;Os12g0234000;Os12g0527800;Os10g0547200;Os02g0179250;Os03g0425300;Os07g0169100;Os10g0407400;Os04g0472200;Os08g0137300;Os02g0264700;Os02g0768100;Os04g0579700;Os05g0114950;Os05g0102900;Os11g0201000;Os08g0559501;Os01g0651200;Os02g0180500;Os02g0680400;Os04g0611050;Os01g0243800;Os11g0635000;Os08g0501…
Novel_3_14968	Os04g0397800;Os04g0487000
Novel_3_14271	Os04g0298700;Os12g0234000;Os09g0418250;Os01g0889200;Os02g0128500
osa-miR5493	Os01g0737550;Os02g0555600;Os10g0142500;Os11g0207000;Os04g0439400;Os06g0709000;Os04g0430700;Os05g0564100;Os02g0201000;Os01g0316100;Os08g0516200;Os01g0235300;Os05g0401200;Os06g0327300;Os07g0510600;Os10g0495200;Os03g0704700;Os01g0926450;Os08g0188151;Os01g0824900;Os06g0247000;Os02g0201500;Os11g0242700;Os10g0493100;Os09g0572100;Os08g0119900;Os03g0233750;Os07g0140633;Os10g0113900;Os02g0712650;Os10g0113…
Novel_6_27860	Os09g0333600;Os06g0610350;Os07g0151650;Os04g0558700;Os02g0550800;Os02g0771600;Os07g0160100;Os03g0714400;Os03g0339900;Os12g0583801;Os02g0210800;Os11g0199000;Os04g0413200;Os02g0526650;Os03g0268400
Novel_9_35788	Os02g0633000;Os02g0183900;Os04g0273100;Os01g0900400;Os03g0784000;Os01g0820000;Os01g0900700
Novel_4_18799	Os08g0256750;Os10g0350200
osa-miR1857-5p	Os06g0153200;Os02g0664400;Os11g0438000;Os09g0467100;Os02g0606900;Os06g0124300;Os11g0621000;Os07g0121750;Os05g0492600;Os11g0598300;Os01g0247700;Os10g0336300;Os06g0133100;Os09g0124816;Os09g0321900;Os11g0546900;Os08g0536150;Os10g0374600;Os01g0813900;Os02g0513000;Os12g0102300;Os06g0167000;Os12g0106500;Os08g0204632;Os05g0453401;Os03g0858100;Os12g0498500;Os07g0273900;Os08g0200750;Os07g0598400;Os05g0549…
osa-miR2863a	Os02g0654400;Os02g0179900;Os04g0420300;Os06g0622000;Os02g0792800;Os07g0520400;Os04g0466700;Os10g0476100;Os07g0211800;Os04g0446750;Os05g0405000;Os06g0553200;Os06g0575400;Os06g0167150;Os12g0107300;Os03g0352450;Os05g0107600;Os04g0420033;Os12g0106900;Os04g0177000
osa-miR5505	Os02g0710800
Novel_5_23295	Os05g0504800;Os11g0472000;Os02g0144300;Os01g0516600;Os11g0131800
Novel_9_37809	Os12g0288000;Os01g0715800;Os05g0172000;Os01g0154950;Os02g0179250;Os12g0122400;Os11g0116000;Os06g0627400;Os04g0667300;Os02g0833200;Os10g0406701;Os12g0135000;Os05g0534500
osa-miR1850.2	Os11g0629566;Os04g0675200;Os02g0156800;Os03g0752000;Os02g0145500;Os11g0610900;Os06g0127700;Os07g0170900;Os05g0234366;Os12g0255200;Os07g0122900;Os06g0113950;Os07g0213300;Os01g0274901;Os02g0157400;Os06g0160800;Os04g0622400;Os09g0440851;Os01g0871100;Os06g0629362;Os12g0604600;Os05g0426300;Os01g0694100;Os04g0529500;Os04g0465700;Os01g0281600;Os05g0426200;Os12g0122400
osa-miR11338-3p	Os01g0594600
Novel_3_11614	Os02g0671950;Os01g0645650;Os12g0443101;Os01g0542100;Os08g0437050;Os07g0272900
osa-miR2864.2	Os07g0538000;Os08g0377150;Os03g0120000;Os06g0554800;Os03g0810100;Os03g0759700;Os12g0103500;Os08g0192100;Os11g0602200;Os03g0740833;Os02g0237801;Os05g0589200;Os04g0171800;Os09g0392400;Os01g0259400;Os03g0130800;Os03g0411100;Os02g0788600;Os10g0132901;Os03g0667100;Os05g0593550;Os08g0527600;Os05g0325400;Os10g0140200;Os10g0512500;Os02g0577300;Os06g0341600;Os06g0204600;Os02g0262800;Os02g0826200;Os08g0476…
osa-miR166b-3p	Os02g0729300;Os03g0109400;Os03g0651201;Os02g0222000;Os02g0676400;Os12g0267900;Os03g0640800;Os04g0571600;Os10g0480200;Os07g0515200;Os09g0415050;Os12g0612700;Os03g0164901;Os04g0298501;Os07g0581366;Os01g0909600
Novel_3_11613	Os01g0542100;Os08g0437050;Os07g0272900;Os02g0671950;Os12g0443101;Os01g0645650
osa-miR395p	Os01g0346400;Os03g0330000;Os04g0665800;Os07g0496000;Os04g0585400;Os02g0620800;Os07g0590700;Os02g0272900;Os03g0195300;Os06g0556451;Os04g0650300;Os03g0195500;Os04g0367000;Os10g0502600;Os03g0731500;Os11g0668100;Os02g0190300;Os08g0367400;Os06g0486000;Os10g0115600;Os03g0743900;Os02g0190000;Os09g0567900
Novel_1_1708	Os12g0198400;Os01g0781700;Os06g0286500;Os03g0100900;Os01g0782100;Os08g0506000;Os12g0563500;Os08g0245400;Os07g0668800;Os09g0515100;Os02g0595300
osa-miR2090	Os04g0321700;Os10g0113900;Os09g0407650;Os09g0381600;Os05g0545200;Os01g0276200;Os05g0248301;CAA33969
Novel_1_327	Os08g0161401;Os01g0936700;Os06g0148200;Os02g0785800
Novel_8_31957	Os09g0444550;Os07g0490600;Os10g0438500;Os05g0281400;Os07g0540200;Os12g0130900;Os03g0824600;Os08g0113800;Os11g0484700;Os04g0691800;Os06g0199500;Os07g0270950;Os05g0163100;Os10g0486916;Os06g0724100;Os01g0836400;Os03g0758900;Os03g0607400;Os09g0443000;Os06g0666100;Os01g0972300;Os03g0305600;Os07g0133601;Os10g0548900;Os02g0595700;Os04g0629100;Os03g0665950;Os02g0690500;Os01g0197500;Os04g0326201;Os08g0119…
osa-miR1862d	Os02g0179250;Os02g0188201;Os01g0160800;Os01g0841050;Os01g0715800;Os05g0324300;Os08g0421000;Os03g0649275;Os12g0115300;Os01g0916350;Os10g0558900;Os04g0380300;Os08g0486266;Os12g0583801
Novel_6_27323	Os03g0570775
Novel_2_7762	Os06g0494701;Os02g0536601;Os12g0138800;Os06g0205250;Os06g0235200;Os06g0656500;Os05g0580600;Os06g0216966;Os06g0241100;Os01g0825900;Os02g0727966;Os06g0136201;Os09g0414600;Os03g0125650;Os07g0474700;Os11g0606001;Os05g0453700;Os04g0253601;Os02g0141201
osa-miR2106	Os03g0152600;Os01g0574500;Os10g0341750;Os12g0511600;Os02g0817000;Os01g0124550;Os01g0852000;Os01g0259400
osa-miR5074	Os02g0594651;Os07g0434700;Os07g0187900;Os08g0186200;Os05g0175450;Os06g0151200;Os07g0208700;Os05g0320700;Os08g0533450;Os02g0241200;Os04g0545400;Os06g0567900;Os01g0353633;Os08g0399300;Os10g0485800;Os05g0354075;Os07g0211601;Os12g0160100;Os08g0530100;Os02g0261000;Os04g0510000;Os03g0254700;Os04g0572100;Os04g0447800;Os04g0447400;Os09g0281750;Os01g0640200;Os05g0412000;Os12g0637200;Os01g0966000;Os01g0113…
Novel_8_34401	Os11g0131800;Os02g0144300;Os01g0516600;Os11g0472000;Os05g0504800
Novel_3_13868	Os04g0558700;Os02g0550800;Os09g0333600;Os06g0610350;Os07g0151650;Os02g0771600;Os07g0160100;Os03g0714400;Os03g0339900;Os02g0526650;Os03g0268400;Os02g0210800;Os12g0583801;Os11g0199000;Os04g0413200
Novel_8_35475	Os01g0254900;Os12g0215950;Os01g0971700;Os01g0111300;Os03g0428000;Os12g0441600;Os12g0211500;Os12g0168700;Os12g0217400;Os11g0632200;Os03g0807000;Os08g0185900;Os04g0691200;Os06g0567433;Os02g0187800;Os09g0274100;Os03g0731900;Os01g0905200
Novel_2_8775	Os06g0221100;Os05g0442550;Os05g0440250;Os03g0704700
Novel_6_25267	Os01g0645650;Os12g0443101;Os01g0569800;Os07g0272900;Os11g0286500
osa-miR1846d-3p	Os01g0867300;Os08g0433300;Os06g0706700;Os03g0128600;Os04g0101800;Os10g0494300;Os10g0485800;Os10g0122200;Os01g0830100;Os01g0523000;Os06g0296967;Os12g0121600;Os04g0477200;Os07g0642600;Os04g0638100;Os10g0544600;Os03g0305700;Os01g0951500;Os04g0610200;Os12g0291000;Os01g0923700;Os09g0447900;Os01g0937900;Os09g0488600;Os05g0101400;Os09g0439000;Os01g0514700;Os10g0489900;Os12g0621000;Os11g0482901;Os10g0165…
Novel_10_38784	Os03g0347900;Os12g0150901;Os12g0480300;Os02g0745200;Os08g0215300
Novel_2_7276	Os05g0525850;Os06g0591200;Os02g0166600;Os10g0503100;Os07g0191650
Novel_6_28101	Os01g0686100;Os10g0210500;Os05g0362000;Os06g0674000;Os12g0570400;Os02g0612700;Os06g0676400
osa-miR169a	Os10g0463100;Os12g0430000;Os02g0776400;Os10g0135250;Os10g0390000;Os03g0719700;Os05g0564200;Os06g0186400;Os12g0618600;Os11g0252400;Os03g0411100;Os03g0696300;Os07g0608200;Os03g0174900;Os04g0597866;Os07g0158500;Os08g0276400;Os03g0287500;Os05g0408300;Os04g0602800;Os02g0294100;Os01g0236300;Os08g0337700;Os03g0647600
Novel_3_12307	Os07g0272900;Os01g0314100;Os08g0227900;Os12g0443101;Os01g0645650;Os01g0569800
Novel_9_35703	Os05g0298900
Novel_11_41895	Os07g0618500;Os08g0486266;Os01g0916350;Os05g0418100;Os01g0632100;Os05g0534500;Os02g0525501;Os03g0649275;Os05g0172000;Os12g0288000;Os01g0715800;Os05g0131000;Os12g0105800;Os12g0122400;Os01g0230700;Os04g0380300;Os04g0350100;Os04g0396800;Os12g0115300;Os12g0135000;Os08g0421000;Os12g0110475;Os08g0286500;Os04g0556500;Os06g0574100;Os01g0939000;Os06g0676400;Os02g0179250
Novel_1_1714	Os01g0504950;Os06g0230801;Os08g0191300;Os08g0431700;Os12g0243050;Os10g0358150
Novel_11_43317	Os10g0427100;Os03g0234100
osa-miR396d	Os06g0204800;Os01g0514300;Os04g0650700;Os07g0154900;Os07g0134600;Os02g0701300;Os02g0188201;Os02g0678800;Os11g0551900;Os11g0129700;Os04g0600900;Os04g0574500;Os02g0776900;Os02g0531450;Os09g0471200;Os01g0510800;Os01g0947833;Os03g0674700;Os07g0275300;Os08g0525800;Os03g0729500;Os10g0102900;Os12g0126300;Os04g0307300;Os12g0204800;Os04g0568800;Os03g0816000;Os04g0609900;Os08g0190300;Os11g0303500;Os01g0737…
Novel_2_8332	Os07g0596300;Os04g0671900;Os03g0167000;Os01g0868300;Os04g0182400;Os12g0158300;Os05g0333600;Os03g0211800;Os02g0665300;Os10g0559700;Os06g0562600;Os11g0691800;Os11g0168500;Os11g0657000;Os05g0597400;Os07g0562700;Os02g0730600;Os03g0321900;Os01g0937500;Os02g0802250;Os12g0181701;Os07g0584283;Os05g0130600;Os01g0228450;Os07g0557500;Os04g0625100;Os12g0586300;Os02g0824300;Os01g0897700;Os10g0205300;Os10g0442…
Novel_6_27488	Os02g0527700;Os04g0611050;Os04g0580800;Os01g0301500;Os01g0891601;Os02g0466050;Os03g0145900;Os05g0172000;Os12g0561900;Os12g0221400;Os02g0740600;Os01g0651200;Os02g0184100;Os02g0652100;Os01g0877001;Os03g0730000;Os02g0680400;Os08g0356001;Os03g0644000;Os09g0567100;Os02g0807700;Os06g0199100;Os03g0708400;Os02g0319300;Os06g0151600;Os10g0407400;Os01g0220900;Os08g0137300;Os10g0541000;Os04g0539701;Os10g0420…
osa-miR156c-3p	Os08g0242800;Os05g0586050;Os01g0355900;Os02g0667600;Os03g0647600;Os11g0592550;Os10g0476000;Os06g0567666;Os02g0712400;Os03g0815900;Os03g0860050;Os11g0105750;Os10g0479900;Os01g0142500;Os12g0105300;Os12g0511400;Os03g0365200;Os03g0727000;Os02g0723200;Os07g0603500;Os09g0492700;Os04g0388900;Os05g0405500;Os07g0229700;Os06g0324000;Os07g0447800;Os03g0750000;Os01g0121950;Os12g0210400;Os07g0515200
Novel_3_14633	Os05g0525850;Os02g0166600;Os06g0591200;Os10g0503100;Os07g0191650
Novel_4_19756	Os01g0195500;Os01g0846500;Os04g0436300
osa-miR159d	Os11g0117700;Os06g0679400;Os03g0339700;Os09g0384601;Os03g0785800;Os01g0812000;Os04g0535600;Os03g0296500;Os06g0605600;Os03g0783800;Os12g0616400;Os03g0331700;Os05g0490600;Os07g0152000;Os02g0671950;Os11g0659400;Os01g0665200;Os03g0578900;Os06g0355500;Os03g0756200;Os07g0227750;Os05g0501800;Os01g0212500
osa-miR818d	Os03g0306400;Os05g0532500;Os06g0593800;Os02g0282000;Os01g0908001;Os01g0296900;Os01g0228500;Os07g0144732;Os08g0387200;Os06g0262501;Os07g0596950;Os01g0264400;Os08g0522300;Os01g0202500;Os07g0218600;Os04g0474500;Os06g0167500;Os03g0227500;Os02g0728700;Os03g0651900;Os09g0401000;Os09g0411600;Os03g0683900;Os06g0601500;Os10g0406701;Os03g0747300;Os03g0259300;Os07g0616750;Os07g0595700;Os02g0188201;Os02g0712…
osa-miR6245b-3p	Os07g0272900;Os01g0163000;Os11g0286500;Os11g0518900;Os06g0185800;Os08g0154225;Os06g0283300;Os11g0697001;Os08g0227900;Os12g0417100;Os02g0286700;Os01g0793300;Os02g0788800;Os01g0645650;Os04g0286333
Novel_5_21361	Os04g0487000;Os04g0397800
Novel_3_11957	Os01g0620400;Os02g0648900;Os08g0423400
Novel_6_24504	Os04g0413200;Os04g0294401;Os08g0235651;Os12g0138000;Os02g0771600;Os01g0608900;Os01g0274901;Os04g0558700;Os11g0586100
Novel_4_19105	Os04g0436400;Os12g0292200;Os02g0778900;Os05g0362000;Os11g0474450;Os02g0612700;Os12g0570400;Os03g0393700;Os12g0543701;Os01g0686100;Os06g0674000;Os10g0210500
osa-miR167g	Os12g0169400;Os09g0567700;Os01g0971900;Os01g0192550;Os06g0129100;Os06g0677800;Os07g0481400;Os07g0195200;Os07g0207700;Os02g0164900;Os07g0681500;Os05g0143300;Os03g0789466;Os02g0211350;Os03g0211800;Os07g0522600;Os07g0293000;Os03g0674700;Os06g0334300;Os08g0246300;Os03g0161950;Os02g0708300;Os05g0108300;Os08g0120200;Os12g0613700;Os01g0972000;Os07g0161500;Os03g0831000;Os04g0671900;Os09g0327600;Os02g0742…
Novel_3_11947	Os12g0182300
osa-miR396a-3p	Os01g0260500;Os06g0682850;Os09g0407900;Os12g0182300;Os12g0612500;Os03g0218100;Os12g0625000;Os06g0207000;Os04g0446000;Os08g0113800;Os12g0503200;Os07g0468500;Os12g0264500;Os02g0226000;Os03g0674600;Os02g0139200;Os05g0144400;Os04g0379600;Os11g0637166;Os03g0424600;Os07g0176401;Os09g0508250;Os08g0359200;Os01g0282251;Os10g0579800;Os02g0754100;Os09g0545400;Os02g0137100;Os03g0308100;Os04g0553800;Os08g0566…
Novel_3_13617	Os02g0612700;Os03g0393700;Os10g0210500;Os05g0362000;Os01g0686100;Os12g0292200
osa-miR156a	Os07g0505200;Os12g0441600;Os07g0456700;Os03g0412300;Os01g0140100;Os02g0752300;Os04g0681400;Os08g0437050;Os04g0653000;Os08g0509600;Os11g0496600;Os03g0735400;Os09g0491532;Os05g0305900;Os02g0445200;Os04g0411300;Os01g0657100;Os05g0143600;Os09g0382000;Os09g0566400;Os11g0141800;Os04g0681600;Os03g0561400;Os06g0542350;Os07g0616850;Os10g0535900;Os05g0555600;Os02g0174100;Os06g0649800;Os10g0563900;Os01g0769…
osa-miR1431	Os08g0538300;Os03g0127900;Os12g0637700;Os02g0770500;Os01g0967800;Os04g0441700;Os02g0678300;Os01g0188900;Os03g0295600;Os06g0134900;Os12g0637800;Os01g0512700;Os10g0533000;Os01g0132766
osa-miR166h-3p	Os12g0612700;Os03g0109400;Os03g0651201;Os02g0729300;Os07g0515200;Os02g0676400;Os04g0298501;Os03g0640800;Os04g0571600;Os01g0909600;Os10g0480200
Novel_4_17146	Os12g0543701;Os02g0612700;Os11g0474450;Os12g0570400;Os03g0393700;Os06g0674000;Os10g0210500;Os01g0686100;Os04g0436400;Os02g0778900;Os05g0362000;Os12g0292200
osa-miR396c-3p	Os03g0674600;Os09g0538700;Os02g0588250;Os04g0206100;Os09g0514350;Os02g0574900;Os08g0351300;Os08g0177600;Os09g0450300;Os05g0492500;Os10g0151233;Os11g0479300;Os04g0674500;Os01g0647100;Os11g0429100;Os04g0453400;Os01g0160700;Os03g0203700;Os03g0424000;Os04g0379600;Os01g0926350;Os03g0782950
osa-miR814c	Os12g0583500;Os03g0668033;Os03g0856000;Os06g0594100;Os01g0116300;Os10g0406701;Os06g0718400;Os09g0551300;Os11g0649700;Os12g0583801;Os02g0705300;Os11g0167300
osa-miR1880	Os11g0427601;Os04g0475000
Novel_7_30125	Os07g0596950;Os05g0137700;Os12g0264500;Os01g0230700;Os03g0777600;Os07g0616750;Os01g0274601;Os01g0908001;Os11g0199700;Os02g0188201;Os12g0407100;Os03g0363500
Novel_6_27056	Os11g0671650
osa-miR171f-3p	Os06g0105350;Os09g0513900;Os03g0758950;Os02g0662700;Os05g0469600;Os12g0270300;Os04g0555000;Os08g0493900;Os02g0518400;Os09g0555600;Os05g0417100;Os03g0658800;Os01g0923900;Os02g0663100;Os09g0247101;Os03g0366350;Os03g0135550;Os12g0552800;Os08g0116900;Os05g0132300;Os10g0551200
osa-miR1439	Os06g0191900;Os08g0162066;Os12g0197400;Os09g0498000;Os08g0472600;Os09g0392666;Os09g0343400;Os12g0227500;Os07g0152301;Os05g0119000;Os10g0204300;Os03g0328900;Os11g0610900;Os07g0161600;Os12g0209502;Os03g0265001;Os03g0668033;Os01g0116000;Os11g0167200;Os08g0477500;Os03g0698500;Os03g0229575;Os12g0274450;Os02g0535300;Os01g0210900;Os03g0187100;Os04g0551700;Os06g0140200;Os07g0194950;Os01g0196800;Os08g0400…
Novel_3_11672	Os01g0608900;Os04g0558700;Os11g0586100;Os01g0274901;Os12g0138000;Os02g0771600;Os04g0294401;Os04g0413200
osa-miR2118c	Os04g0375300;Os10g0161400;Os11g0640800;Os05g0414200;Os01g0308300;Os03g0113800;Os08g0539700;Os04g0444400;Os10g0532100;Os08g0265300;Os08g0224000;Os01g0149350;Os01g0149500;Os06g0619600;Os04g0435300;Os12g0543701
Novel_5_22351	Os12g0188900;Os02g0599700;Os02g0600033;Os07g0534000;Os02g0598500;Os02g0599150;Os03g0769400;Os02g0599151
Novel_3_15805	Os07g0301200;Os03g0119800;Os10g0394100
osa-miR827	Os10g0131800;Os08g0245400;Os04g0560100;Os06g0319600;Os01g0702400;Os02g0807800;Os08g0499100;Os11g0104800;Os04g0573000;Os02g0678200;Os04g0659900;Os03g0839900
osa-miR393b-5p	Os03g0559700;Os04g0684100;Os05g0150500;Os05g0203900;Os05g0528200;Os01g0229250;Os04g0395600;Os06g0142900;Os01g0522400
osa-miR1863a	Os06g0483500;Os02g0552700;Os05g0114100
osa-miR5540	Os06g0325700;Os02g0233566;Os06g0311700;Os03g0453301;Os02g0120100;Os11g0643100;Os01g0900750;Os01g0136700;Os06g0671075;Os11g0657400;Os11g0642400;Os09g0276000;Os06g0698785;Os08g0152700;Os08g0471150;Os01g0635400;Os03g0328300;Os05g0582600
Novel_12_44953	Os03g0421100;Os07g0634900;Os05g0414400;Os01g0119500;Os03g0651201;Os02g0194200;Os12g0225900;Os08g0128700
osa-miR818c	Os08g0483200;Os07g0489950;Os08g0176633;Os11g0199700;Os03g0170400;Os09g0248000;Os01g0513200;Os05g0127200;Os02g0313500;Os08g0495300;Os01g0107000;Os03g0363500;Os01g0274601;Os01g0824600;Os07g0471683;Os03g0777600;Os01g0805975;Os12g0264500;Os10g0104300;Os02g0130200;Os09g0260900;Os12g0616000;Os04g0667100;Os06g0148000;Os04g0451200;Os09g0109800;Os03g0376350;Os01g0186400;Os01g0651200;Os05g0480000;Os01g0785…
Novel_8_35473	Os03g0257600;Os05g0515400;Os12g0609000
osa-miR1869	Os11g0245466;Os04g0435200;Os04g0435475;Os04g0435325
osa-miR396f-5p	Os08g0289400;Os06g0255700;Os06g0204800;Os01g0125550;Os02g0590200;Os02g0701300;Os03g0674700;Os07g0434500;Os03g0680200;Os04g0600900;Os11g0689100;Os02g0678800;Os02g0611650;Os04g0307300;Os02g0776900
osa-miR5160	Os03g0390400;Os03g0111200;Os01g0136700;Os08g0220400;Os01g0900750;Os04g0679050;Os03g0861700;Os06g0311700;Os03g0177400;Os02g0155700;Os05g0582600;Os03g0328300;Os02g0745100;Os12g0492900;Os09g0521400;Os03g0221600
Novel_8_33578	Os03g0668033
Novel_2_7724	Os08g0434100;Os04g0555900
Novel_3_11429	Os05g0418901;Os06g0271900;Os06g0297400;Os04g0112100;Os09g0400400
osa-miR399j	Os01g0871350;Os02g0291500;Os08g0532400;Os05g0557700;Os03g0125650;CAA33923;Os04g0691900;Os01g0600400;Os12g0154000;Os02g0614966;Os01g0271000;Os09g0401550;CAA33938;Os01g0781200;Os12g0154600;Os08g0468400;Os04g0415000;Os07g0597100;Os02g0216300;Os05g0529700;Os04g0141800;Os08g0564000;Os01g0748600;Os04g0152000;Os04g0645100
osa-miR171d-3p	Os09g0247101;Os03g0366350;Os03g0135550;Os12g0552800;Os08g0116900;Os05g0132300;Os10g0551200;Os06g0105350;Os09g0513900;Os03g0758950;Os02g0662700;Os05g0469600;Os12g0270300;Os04g0555000;Os08g0493900;Os02g0518400;Os09g0555600;Os03g0658800;Os05g0417100;Os01g0923900;Os02g0663100
Novel_8_33865	Os12g0104300;Os04g0684100;Os04g0576800;Os07g0493400;Os02g0795000;Os04g0284500
osa-miR5153	Os05g0143550
Novel_8_33571	Os06g0320200;Os08g0197500;Os03g0135800;Os08g0525900
osa-miR2094-3p	Os07g0537900;Os03g0161100;Os02g0661900;Os02g0696700;Os01g0875500;Os02g0816000;Os09g0491612;Os10g0574700;Os04g0150500;Os01g0767700
osa-miR5078	Os12g0262100;Os03g0587250;CAA33941;Os03g0136400;Os02g0790500;Os06g0125300;Os07g0575900;CAA33920;Os04g0473025;Os04g0471000;Os01g0829700;Os06g0172901;Os01g0793701;Os05g0243200;Os03g0163500
osa-miR11338-5p	Os04g0250050;Os10g0496900;Os11g0578500;Os04g0468000
osa-miR1437a	Os01g0328400;Os11g0704500;Os03g0267600;Os11g0457300;Os03g0305600;Os01g0672201;Os04g0640700;Os03g0179900;Os03g0299800;Os01g0702300;Os05g0140000;Os01g0798900;Os02g0688500;Os01g0551000;Os03g0144300;Os01g0900300;Os03g0726300;Os06g0229800;Os01g0734150;Os04g0391500;Os07g0662700;Os04g0456900;Os04g0437300;Os10g0458900;Os03g0334300;Os01g0849100;Os04g0402500;Os07g0518100;Os03g0692000;Os07g0499800;Os01g0595…
Novel_2_9874	Os01g0623600;Os01g0549200;Os09g0397200;Os08g0537200;Os10g0528900;Os08g0373000;Os06g0273300;Os05g0558400;Os12g0544600;Os01g0768600;Os09g0485600;Os10g0549500;Os10g0415600;Os08g0529000;Os08g0448100;Os09g0494600;Os03g0239200;Os04g0531700;Os11g0615900
Novel_4_18397	Os03g0257600;Os05g0515400;Os12g0609000
Novel_11_44171	Os02g0216150;Os04g0560100;Os03g0594600;Os12g0145916;Os01g0950700;Os02g0641800;Os03g0853700;Os03g0426900;Os06g0275500;Os01g0580800;Os07g0220333;Os04g0405500;Os03g0762700;Os08g0483900;Os07g0690900;Os06g0176100;Os04g0183401;Os03g0185400;Os03g0760000;Os03g0283300;Os01g0727100;Os08g0119700;Os06g0699100;Os10g0422600;Os08g0107700;Os06g0163200;Os04g0480700;Os01g0638800;Os04g0627900;Os04g0674750;Os01g0275…
osa-miR394	Os08g0190700;Os04g0614650;Os11g0278900;Os06g0703500;Os01g0110400;Os10g0130300;Os01g0923900;Os11g0109900;Os01g0855400;Os04g0569300;Os02g0139400;Os08g0281500;Os07g0647800;Os11g0173750;Os03g0403100;Os12g0103150;Os06g0267500;Os01g0816700;Os07g0274800;Os07g0588800;Os02g0152400;Os08g0524800;Os04g0458200;Os10g0554900;Os06g0234300;Os01g0612700;Os02g0821800;Os07g0572300;Os03g0672400;Os07g0183200;Os03g0359…
osa-miR11343-3p	Os09g0447300;Os09g0271000;Os02g0769200;Os06g0340200;Os01g0117500;Os01g0530400;Os06g0303800;Os11g0470966;Os08g0494400;Os12g0540000;Os01g0667100;Os03g0255200;Os10g0424400;Os02g0266900;Os09g0572400;Os04g0432200;Os07g0440900;Os12g0231100;Os04g0196200;Os07g0601900;Os03g0237600;Os05g0512200;Os10g0407000;Os02g0787966;Os12g0639800;Os03g0332201;Os01g0837300;Os10g0396400;Os04g0420500;Os09g0240850;Os12g0126…
osa-miR156l-3p	Os01g0142500;Os03g0365200;Os05g0149600;Os09g0516700;Os06g0115600;Os09g0564200;Os09g0420900;Os08g0491200;Os01g0121950;Os05g0586050;Os08g0105000;Os05g0316200;Os08g0375900;Os02g0272600;Os11g0592550;Os06g0104300;Os03g0860050
Novel_2_10661	Os03g0558400;Os06g0207950
osa-miR5813	Os03g0285900;Os02g0218400;Os05g0439750;Os03g0839400;Os10g0486200;Os09g0572600;Os01g0958500;Os07g0558800;Os01g0885300;Os04g0423200;Os12g0165300
osa-miR396h	Os04g0574500;Os02g0531450;Os02g0776900;Os04g0600900;Os11g0129700;Os04g0650700;Os07g0154900;Os02g0701300;Os07g0134600;Os06g0204800;Os01g0514300;Os02g0678800;Os11g0551900;Os02g0188201;Os01g0737900;Os11g0303500;Os11g0606600;Os04g0568800;Os12g0204800;Os08g0190300;Os04g0609900;Os03g0816000;Os07g0248800;Os12g0484900;Os07g0275300;Os03g0674700;Os09g0471200;Os01g0510800;Os01g0947833;Os12g0126300;Os04g0307…
osa-miR156j-5p	Os06g0251700;Os06g0644600;Os08g0128200;Os09g0472000;Os09g0507100;Os10g0539650;Os07g0571100;Os11g0114600;Os07g0615900;Os10g0578800;Os11g0597400;Os03g0355600;Os02g0139400;Os04g0414300;Os01g0974800;Os11g0209300;Os07g0191200;Os02g0695050;Os02g0687550;Os06g0703500;Os09g0513100;Os11g0151500;Os08g0531600;Os01g0814900;Os01g0166400;Os06g0724800;Os01g0700100;Os08g0404200;Os02g0115650;Os04g0321500;Os05g0343…
Novel_2_6345	Os03g0170000
osa-miR5826	Os06g0474800;Os03g0291800
osa-miR1876	Os10g0388600;Os02g0152900;Os08g0542200;Os07g0602200;Os09g0573200;Os10g0409566;Os06g0647400;Os04g0117300
Novel_4_16038	Os10g0540300;Os07g0296000;Os05g0185767;Os11g0427401;Os02g0523650;Os11g0233201;Os11g0454800;Os09g0339601;Os06g0561501
Novel_3_15263	Os11g0131800;Os07g0114000;Os01g0516600;Os04g0683800;Os11g0472000;Os07g0558500;Os05g0504800
osa-miR166m	Os04g0481050;Os09g0565300;Os12g0612700;Os04g0298501;Os01g0909600;Os07g0581366;Os12g0211600;Os12g0216000;Os02g0729300;Os02g0550600;Os03g0651201;Os03g0109400;Os02g0222000;Os02g0676400;Os10g0480200;Os04g0571600;Os03g0640800;Os07g0515200
Novel_12_45671	Os01g0645650;Os12g0443101;Os01g0569800;Os07g0272900;Os11g0286500
osa-miR2866	Os12g0145400;Os03g0364700;Os06g0663600;Os12g0417000;Os03g0191700;Os09g0458000;Os04g0539800;Os10g0463100;Os02g0297200;Os01g0532700;Os04g0611000;Os07g0620200;Os07g0636200;Os02g0770800;Os04g0593800;Os08g0553800;Os08g0357100;Os06g0482200;Os08g0402100;Os07g0571500;Os03g0335300;Os02g0810500;Os04g0416500;Os11g0608300;Os01g0113200;Os02g0740800;Os01g0835000;Os04g0590400;Os04g0616900;Os11g0678400;Os02g0244…
osa-miR159b	Os03g0578900;Os01g0665200;Os02g0671950;Os12g0210400;Os06g0143900;Os01g0507000;Os03g0756200;Os01g0874900;Os11g0569600;Os09g0541900;Os05g0501800;Os03g0683866;Os06g0360500;Os06g0247651;Os01g0212500;Os07g0551750;Os05g0527200;Os11g0153400;Os05g0358700;Os04g0469700;Os09g0538700;Os03g0796400;Os06g0605600;Os01g0812000;Os05g0490600;Os09g0442000;Os03g0331700
Novel_3_15851	Os12g0570500;Os05g0477800
Novel_7_29037	Os10g0539600;Os10g0187366;Os01g0654200;Os07g0102300;Os02g0630650;Os04g0352066;Os03g0206300;Os03g0268900;Os05g0221400;Os06g0670500;Os06g0514700;Os07g0577300;Os01g0728900;Os12g0633650;Os10g0130600;Os03g0392300;Os04g0360500;Os08g0294300;Os03g0231700;Os08g0524100;Os10g0343100;Os10g0328700;Os12g0122400;Os09g0381800;Os01g0609000;Os02g0815400;Os01g0825900;Os11g0692000;Os09g0554000;Os08g0437050;Os10g0458…
osa-miR395d	Os02g0272900;Os03g0195300;Os06g0556451;Os04g0585400;Os02g0620800;Os07g0590700;Os03g0330000;Os04g0665800;Os07g0496000;Os01g0346400;Os03g0743900;Os02g0190000;Os09g0567900;Os11g0668100;Os08g0367400;Os02g0190300;Os06g0486000;Os10g0115600;Os04g0367000;Os03g0731500;Os10g0502600;Os04g0650300;Os03g0195500
osa-miR156j-3p	Os12g0197500;Os07g0101800;Os09g0420900;Os09g0564200;Os08g0491200;Os05g0158700;Os08g0127800;Os08g0180300;Os08g0426000;Os05g0155000;Os02g0326100;Os04g0253601;Os11g0454800;Os03g0393300;Os08g0558900;Os02g0617600;Os04g0435300;Os06g0104300;Os02g0149600;Os01g0321800;Os11g0707900;Os08g0399900;Os10g0436900;Os01g0513900;Os09g0466201
osa-miR2118q	Os10g0532100;Os08g0224000;Os08g0265300;Os01g0149500;Os01g0149350;Os04g0444400;Os06g0619600;Os04g0435300;Os12g0543701;Os05g0414200;Os01g0308300;Os10g0161400;Os04g0375300;Os11g0640800;Os03g0113800;Os08g0539700
Novel_12_45759	Os01g0134850;Os12g0611700;Os04g0175900;Os05g0177500;Os03g0614901;Os04g0107600;Os12g0607800;Os10g0100700;Os04g0455800;Os01g0690200;Os07g0275300;Os04g0650500;Os07g0534400;Os01g0738400;Os07g0236700;Os02g0499000;Os08g0360700;Os01g0829100;Os06g0282000;Os04g0453233;Os01g0213100;Os08g0498400;Os05g0519700;Os05g0586900;Os08g0496600;Os02g0673301;Os01g0327900;Os05g0125900;Os08g0496400;Os04g0508000;Os01g0213…
osa-miR535-5p	Os09g0326950;Os06g0663500;Os02g0139400;Os03g0807200;Os11g0496600;Os11g0686100;Os12g0547500;Os07g0157401;Os09g0464100;Os04g0618700;Os07g0492966;Os03g0828100;Os03g0253600;Os06g0208700;Os07g0543000;Os02g0174100;Os03g0237000;Os07g0620600;Os05g0147600;Os06g0703500;Os11g0110100;Os07g0155600;Os07g0156732
osa-miR5788	Os05g0227901;Os07g0695400;Os03g0421100;Os12g0105800;Os01g0154950;Os05g0172000;Os02g0588300;Os09g0260900;Os07g0623501;Os01g0715800;Os12g0175800;Os03g0649275;Os02g0589600;Os09g0471000;Os01g0544200;Os02g0188201;Os03g0170000;Os08g0130600;Os02g0325100;Os10g0524900;Os10g0406701;Os08g0500700;Os11g0116000;Os03g0170400;Os01g0296900;Os01g0632000;Os07g0187350;Os12g0288000;Os05g0534500;Os08g0200750;Os07g0681…
Novel_8_32418	Os04g0413200;Os04g0294401;Os01g0274901;Os11g0586100;Os04g0558700;Os01g0608900;Os02g0771600;Os08g0235651;Os12g0138000
Novel_4_19986	Os01g0596425;Os11g0116000;Os12g0135000;Os05g0127200;Os01g0824700
osa-miR1862b	Os01g0715800;Os02g0617100;Os07g0562800;Os09g0366500;Os02g0179250;Os06g0574100;Os07g0629900;Os07g0466200;Os02g0589600;Os08g0486266;Os03g0649275;Os08g0421000;Os08g0498600;Os05g0215000
osa-miR166g-5p	Os03g0790700;Os01g0761100;Os08g0356001;Os03g0839700;Os09g0538400;Os07g0175350;Os03g0790900;Os12g0120200;Os02g0288400
osa-miR1861j	Os06g0119300;Os06g0645901;Os05g0596600;Os06g0117500;Os07g0171300;Os09g0499600;Os11g0431100;Os11g0148500;Os12g0145700
Novel_10_39337	Os10g0130500;Os03g0798000;Os09g0123500;Os01g0274601;Os02g0179250;Os02g0833200;Os07g0521500;Os06g0286310;Os11g0610900;Os12g0135000;Os12g0288000;Os11g0116000;Os03g0170400;Os08g0367850;Os01g0296900;Os08g0486266;Os05g0534500;Os05g0127200;Os06g0579600;Os05g0419800;Os01g0544200;Os04g0350100;Os06g0200700;Os10g0406701;Os05g0172000;Os03g0683900;Os01g0841050;Os01g0715800;Os06g0200800;Os08g0430050;Os12g0583…
Novel_7_31529	Os03g0356414;Os05g0194600
Novel_5_21400	Os03g0365250;Os02g0264700;Os06g0230000
osa-miR5148c	Os04g0484850;Os03g0795000;Os09g0385300;Os12g0420100;Os01g0928600;Os06g0626200;Os07g0193600
Novel_11_43023	Os01g0136200;Os01g0136100
Novel_12_46466	Os03g0234100;Os10g0427100
Novel_2_7264	Os10g0513900;Os01g0740300;Os11g0236932
Novel_5_23177	Os07g0616100;Os04g0253601;Os02g0237801;Os07g0474700;Os02g0612700;Os09g0414600;Os03g0641500;Os07g0525100;Os01g0825900;Os06g0241100;Os06g0656500;Os06g0205250;Os10g0543500;Os01g0375100;Os02g0141201;Os11g0606001;Os10g0368902;Os12g0122400;Os03g0125650;Os01g0728000;Os06g0136201;Os02g0727966;Os01g0115700;Os11g0197725;Os09g0251450;Os06g0216966;Os06g0235200;Os05g0580600;Os06g0547100;Os12g0138800;Os06g0494…
Novel_10_38745	Os10g0382400
osa-miR160f-3p	Os03g0809000;Os07g0626300;Os05g0150550;Os01g0873200;Os11g0225300;Os07g0627500;Os01g0189700;Os05g0553150;Os12g0569700;Os01g0851000;Os03g0404800;Os08g0494200;Os02g0822450;Os01g0513500;Os11g0182500;Os02g0153000;Os12g0557800;Os09g0375600;Os09g0543400;Os02g0789150;Os10g0316400;Os01g0133400
osa-miR11342-3p	Os08g0486266;Os01g0594600;Os02g0285700;Os12g0291000
osa-miR1875	Os09g0464000;Os07g0605800;Os09g0464033
Novel_3_13580	Os03g0570775;Os03g0712600
osa-miR399d	Os02g0216300;Os05g0548500;Os12g0154600;Os01g0781200;Os04g0415000;Os05g0293600;Os08g0468400;Os10g0558125;Os08g0564000;Os09g0472200;Os04g0645100;Os05g0529700;Os04g0475300;Os08g0484100;Os01g0871350;Os02g0291500;Os04g0656100;Os05g0557700;Os12g0154000;Os02g0614966;Os06g0167500;Os01g0600400;Os04g0691900
Novel_7_29690	Os12g0596300;Os01g0862400;Os06g0210000;Os04g0488700;Os01g0117100;Os02g0616100;Os08g0496800;Os01g0929967;Os07g0670000;Os03g0822300;Os05g0169700;Os10g0411100;Os07g0190000;Os01g0942200;Os03g0115700;Os01g0883000;Os10g0109900;Os05g0210600;Os03g0167400;Os06g0692500;Os11g0239500;Os04g0523500;Os01g0753500;Os03g0347800;Os06g0566300;Os01g0788400;Os02g0600066;Os11g0562266;Os07g0204100;Os05g0130300;Os01g0862…
osa-miR6249b	Os03g0270700;Os01g0857400;Os09g0329000;Os08g0128900;Os04g0617800;Os06g0215100;Os01g0127100;Os03g0186900;Os10g0359200;Os01g0868900;Os03g0163900;Os11g0118350;Os10g0389000;Os07g0183200;Os01g0350300;Os02g0812600;Os01g0124600;Os06g0186300;Os08g0156700;Os08g0547800;Os10g0559800;Os07g0158000;Os06g0188400;Os07g0678300;Os07g0603900;Os07g0193000;Os09g0479800;Os02g0228400;Os05g0171000;Os10g0147900;Os07g0670…
osa-miR2867-3p	Os08g0542200;Os01g0206300;Os03g0667400;Os06g0497350;Os10g0120300;Os01g0945650;Os07g0222700;Os01g0937100;Os02g0666300;Os02g0524800;Os05g0410200;Os03g0271800;Os02g0571000;Os03g0795600;Os04g0509600;Os05g0301700;Os08g0456000;Os04g0196850;Os01g0100600;Os04g0481050;Os02g0532900;Os05g0582100;Os06g0226100;Os12g0114000;Os07g0161500;Os01g0725000;Os10g0208500;Os08g0100700
Novel_7_30562	Os11g0550300;Os05g0504800;Os06g0479400
osa-miR164b	Os07g0461550;Os06g0575400;Os04g0528651;Os09g0549400;Os06g0344900;Os08g0434150;Os08g0331000;Os02g0677800;Os02g0740300;Os06g0675600;Os08g0202300;Os06g0106000;Os03g0424000;Os02g0154600;Os10g0420000;Os10g0571100;Os11g0149400;Os08g0200600;Os08g0250900;Os02g0625000;Os04g0486800;Os05g0162350;Os12g0641100;Os07g0280600;Os12g0610600;Os02g0436400;Os04g0625000;Os05g0589500;Os03g0307500;Os01g0625300;Os03g0424…
osa-miR810a	Os03g0691800;Os12g0448900;Os06g0232200;Os09g0531900;Os03g0667100;Os01g0627400;Os05g0156800;Os02g0314300;Os11g0121500;Os03g0115800;Os10g0572900;Os09g0314200
osa-miR169i-5p.2	Os09g0438700;Os02g0814400;Os11g0543500;Os10g0150800;Os04g0430150;Os02g0124700;Os05g0151150;Os06g0175500;Os07g0115700
Novel_6_24320	Os04g0218600;Os03g0723000;Os12g0160900
osa-miR7693-3p	Os07g0463600;Os06g0482200;Os01g0871150;Os02g0610500;Os01g0293000
osa-miR166d-5p	Os01g0162200;Os11g0610000;Os01g0114400;Os04g0563050;Os01g0117200;Os01g0107900;Os08g0401800;Os04g0584600;Os04g0486800;Os07g0288700;Os11g0609700;Os10g0548300;Os01g0545500;Os10g0407500;Os05g0102800;Os02g0622100;Os12g0454800;Os08g0254300;Os01g0201200;Os01g0116200;Os04g0455900
Novel_1_2005	Os12g0227500;Os04g0115650;Os04g0272700;Os06g0715400;Os06g0624900;Os06g0187050;Os06g0580100;Os12g0197400;Os04g0675000;Os06g0140200;Os03g0358700;Os06g0629362;Os01g0694500;Os04g0171800;Os09g0109800;Os03g0227400;Os01g0387865;Os07g0695400
Novel_5_21843	Os06g0270950;Os01g0111300;Os03g0807000
Novel_7_29457	Os08g0403733;Os03g0752000;Os02g0221300;Os11g0605100;Os01g0650000;Os01g0603200;Os09g0567100;Os04g0651500;Os07g0686300;Os12g0267400;Os01g0699950
Novel_10_40408	Os03g0251800;Os02g0179250;Os07g0296000;Os09g0531650;Os09g0339601
