# Supplementary material for: Research on lncRNA related to drought resistance of Shanlan upland rice
Source: BMC Genomics. 2022 Apr 30;23:336. doi: 10.1186/s12864-022-08546-0 (PMC9055766; doi:10.1186/s12864-022-08546-0)
Supplement: Supplementary file 11 — Additional file 11: Table S011. The relationship of lncRNA with Mrna. [file 12864_2022_8546_MOESM11_ESM.xlsx]

## Sheet: Sheet1
Table S011. The relationship of lncRNA with Mrna
mRNA ID	LncRNA ID	Number of miRNAs corresponding to mRNA	Number of miRNAs corresponding to lncrna	The number of miRNAs shared by both	p-value	Corrected p-value
Os06g0695800	MSTRG.32391.1	7	15	5	2.63168e-08	1.33651e-06
Os01g0625300	MSTRG.10925.8	5	5	4	1.64869e-09	1.05709e-07
Os01g0625300	MSTRG.29052.1	5	5	5	4.26437e-13	9.44856e-11
Os01g0825900	MSTRG.17830.1	8	9	4	5.703e-07	2.3958e-05
Os03g0135550	MSTRG.28732.3	12	5	5	3.37755e-10	2.50169e-08
Os01g0609300	MSTRG.44299.1	3	3	3	1.27905e-08	6.83598e-07
Os01g0609300	MSTRG.17180.6	3	3	3	1.27905e-08	6.83598e-07
Os01g0609300	MSTRG.35818.9	3	3	3	1.27905e-08	6.83598e-07
Os01g0609300	MSTRG.17180.9	3	3	3	1.27905e-08	6.83598e-07
Os02g0141201	MSTRG.1947.1	16	5	5	1.86277e-09	1.1831e-07
Os02g0141201	MSTRG.17830.1	16	9	5	2.2376e-07	9.95551e-06
Os11g0199000	MSTRG.5637.1	17	23	10	9.44578e-13	1.93531e-10
Os06g0644200	MSTRG.42754.2	9	5	4	4.1375e-08	2.05285e-06
Os06g0177200	MSTRG.5637.1	17	23	6	3.35086e-06	7.61041e-05
Os05g0534500	MSTRG.32391.1	9	15	3	0.000455747	0.00333723
Os06g0618300	MSTRG.17830.1	4	9	4	8.31798e-09	4.75704e-07
Os06g0274300	MSTRG.44299.1	4	3	3	5.11622e-08	2.45861e-06
Os06g0274300	MSTRG.17180.6	4	3	3	5.11622e-08	2.45861e-06
Os06g0274300	MSTRG.35818.9	4	3	3	5.11622e-08	2.45861e-06
Os06g0274300	MSTRG.17180.9	4	3	3	5.11622e-08	2.45861e-06
Os06g0675900	MSTRG.42754.2	10	5	4	6.88866e-08	3.2564e-06
Os03g0649275	MSTRG.41603.1	8	7	3	2.45872e-05	0.000411066
Os03g0395700	MSTRG.42754.2	4	5	3	5.10631e-07	2.15155e-05
Os02g0184100	MSTRG.18092.1	8	6	4	6.87442e-08	3.2564e-06
Os05g0227901	MSTRG.5637.1	17	23	5	7.01414e-05	0.00103127
Os02g0833200	MSTRG.32391.1	5	15	3	5.6853e-05	0.000854359
Os03g0366350	MSTRG.28732.3	7	5	5	8.95561e-12	1.13296e-09
Os10g0104300	MSTRG.32391.1	9	15	6	1.35031e-09	8.79229e-08
Os02g0523650	MSTRG.11355.1	5	4	4	3.30078e-10	2.46129e-08
Os03g0237600	MSTRG.18092.1	7	6	3	8.84973e-06	0.000180939
Os12g0610600	MSTRG.10925.8	6	5	4	4.94094e-09	2.91161e-07
Os12g0610600	MSTRG.29052.1	6	5	5	2.55873e-12	4.01937e-10
Os02g0280700	MSTRG.42754.2	7	5	4	1.15169e-08	6.44628e-07
Os02g0680400	MSTRG.18092.1	7	6	3	8.84973e-06	0.000180939
Os10g0407400	MSTRG.18092.1	6	6	3	5.07175e-06	0.000113118
Os10g0410900	MSTRG.42754.2	3	5	3	1.27905e-07	5.79381e-06
Os01g0897500	MSTRG.18092.1	4	6	3	1.02027e-06	4.1501e-05
Os06g0176300	MSTRG.18092.1	8	6	3	1.41183e-05	0.000255065
Os06g0698748	MSTRG.14982.1	3	5	3	1.27905e-07	5.79381e-06
Os06g0698748	MSTRG.13425.1	3	9	3	1.07441e-06	4.34522e-05
Os06g0698748	MSTRG.2139.1	3	6	3	2.55811e-07	1.1278e-05
Os06g0698748	MSTRG.3480.5	3	6	3	2.55811e-07	1.1278e-05
Os05g0418901	MSTRG.42754.2	10	5	4	6.88866e-08	3.2564e-06
Os01g0728900	MSTRG.17830.1	5	9	4	4.1375e-08	2.05285e-06
Os01g0387865	MSTRG.5637.1	9	23	6	2.65079e-08	1.34358e-06
Os06g0148000	MSTRG.32391.1	6	15	5	7.60108e-09	4.35508e-07
Os05g0532500	MSTRG.32391.1	6	15	5	7.60108e-09	4.35508e-07
Os04g0385650	MSTRG.5637.1	5	23	3	0.000217838	0.00289367
Os12g0209502	MSTRG.41603.1	9	7	4	2.86635e-07	1.26083e-05
Os05g0132300	MSTRG.28732.3	5	5	5	4.26437e-13	9.44856e-11
Os03g0410300	MSTRG.42754.2	9	5	3	1.06196e-05	0.00019289
Os01g0307624	MSTRG.17830.1	5	9	3	1.06196e-05	0.00019289
Os12g0292200	MSTRG.42754.2	16	5	5	1.86277e-09	1.1831e-07
Os09g0513900	MSTRG.28732.3	6	5	5	2.55873e-12	4.01937e-10
Os06g0548800	MSTRG.42754.2	7	5	4	1.15169e-08	6.44628e-07
Os06g0548800	MSTRG.18092.1	7	6	3	8.84973e-06	0.000180939
Os02g0188201	MSTRG.32391.1	16	15	5	4.96279e-06	0.000111119
Os11g0599100	MSTRG.18092.1	8	6	4	6.87442e-08	3.2564e-06
Os07g0616750	MSTRG.14982.1	9	5	3	1.06196e-05	0.00019289
Os07g0616750	MSTRG.32391.1	9	15	5	1.54508e-07	6.96223e-06
Os02g0727966	MSTRG.1947.1	13	5	5	5.48851e-10	3.91565e-08
Os02g0727966	MSTRG.17830.1	13	9	7	1.82898e-12	3.54149e-10
Os05g0215000	MSTRG.41603.1	5	7	5	8.95561e-12	1.13296e-09
Os03g0658800	MSTRG.28732.3	5	5	5	4.26437e-13	9.44856e-11
Os06g0235200	MSTRG.17830.1	9	9	4	1.02122e-06	4.15067e-05
Os10g0210500	MSTRG.10106.1	10	10	10	0	0
Os10g0210500	MSTRG.30416.1	10	10	10	0	0
Os10g0210500	MSTRG.44240.1	10	9	9	0	0
Os02g0100300	MSTRG.23319.1	10	14	10	0	0
Os09g0255800	MSTRG.44299.1	6	3	3	2.55811e-07	1.1278e-05
Os09g0255800	MSTRG.17180.6	6	3	3	2.55811e-07	1.1278e-05
Os09g0255800	MSTRG.35818.9	6	3	3	2.55811e-07	1.1278e-05
Os09g0255800	MSTRG.17180.9	6	3	3	2.55811e-07	1.1278e-05
Os03g0644000	MSTRG.18092.1	7	6	3	8.84973e-06	0.000180939
Os06g0256600	MSTRG.14982.1	3	5	3	1.27905e-07	5.79381e-06
Os01g0228500	MSTRG.32391.1	7	15	5	2.63168e-08	1.33651e-06
Os12g0615500	MSTRG.14982.1	4	5	3	5.10631e-07	2.15155e-05
Os10g0390500	MSTRG.44299.1	3	3	3	1.27905e-08	6.83598e-07
Os10g0390500	MSTRG.17180.6	3	3	3	1.27905e-08	6.83598e-07
Os10g0390500	MSTRG.35818.9	3	3	3	1.27905e-08	6.83598e-07
Os10g0390500	MSTRG.17180.9	3	3	3	1.27905e-08	6.83598e-07
Os12g0138000	MSTRG.5637.1	15	23	12	0	0
Os09g0555600	MSTRG.28732.3	5	5	5	4.26437e-13	9.44856e-11
Os05g0512200	MSTRG.18092.1	9	6	3	2.11157e-05	0.000354555
Os02g0130200	MSTRG.32391.1	7	15	6	1.14812e-10	9.9371e-09
Os04g0667100	MSTRG.32391.1	5	15	5	1.28065e-09	8.43073e-08
Os09g0248000	MSTRG.32391.1	8	15	5	6.94203e-08	3.27364e-06
Os06g0205250	MSTRG.1947.1	9	5	5	5.37337e-11	5.05706e-09
Os06g0205250	MSTRG.17830.1	9	9	4	1.02122e-06	4.15067e-05
Os03g0255200	MSTRG.42754.2	10	5	5	1.07467e-10	9.36935e-09
Os02g0769200	MSTRG.18092.1	7	6	3	8.84973e-06	0.000180939
Os06g0579600	MSTRG.14982.1	5	5	3	1.27411e-06	5.08524e-05
Os06g0579600	MSTRG.32391.1	5	15	3	5.6853e-05	0.000854359
Os01g0769000	MSTRG.23319.1	11	14	10	0	0
Os02g0152200	MSTRG.42754.2	9	5	5	5.37337e-11	5.05706e-09
Os01g0651200	MSTRG.32391.1	10	15	5	3.05673e-07	1.34229e-05
Os11g0148400	MSTRG.42754.2	3	5	3	1.27905e-07	5.79381e-06
Os05g0419800	MSTRG.32391.1	3	15	3	5.8197e-06	0.000129632
Os03g0306400	MSTRG.14982.1	10	5	4	6.88866e-08	3.2564e-06
Os03g0306400	MSTRG.32391.1	10	15	7	2.25509e-11	2.55274e-09
Os04g0576800	MSTRG.2338.1	6	6	6	3.33067e-15	1.3383e-12
Os12g0138800	MSTRG.1947.1	10	5	5	1.07467e-10	9.36935e-09
Os12g0138800	MSTRG.17830.1	10	9	4	1.69319e-06	6.6501e-05
Os04g0402250	MSTRG.18092.1	5	6	3	2.54327e-06	7.51858e-05
Os02g0612700	MSTRG.17830.1	23	9	5	1.67167e-06	6.57555e-05
Os11g0586100	MSTRG.5637.1	12	23	12	0	0
Os09g0414600	MSTRG.1947.1	13	5	5	5.48851e-10	3.91565e-08
Os09g0414600	MSTRG.17830.1	13	9	5	6.67973e-08	3.20352e-06
Os09g0513100	MSTRG.23319.1	11	14	10	0	0
Os05g0480000	MSTRG.32391.1	5	15	5	1.28065e-09	8.43073e-08
Os08g0501700	MSTRG.42754.2	8	5	4	2.301e-08	1.18251e-06
Os04g0196200	MSTRG.16647.1	8	8	7	1.9984e-15	8.53857e-13
Os04g0196200	MSTRG.16632.1	8	20	4	2.09437e-05	0.00035266
Os04g0196200	MSTRG.12363.1	8	5	5	2.38817e-11	2.55274e-09
Os04g0196200	MSTRG.10479.20	8	8	5	1.32443e-09	8.66008e-08
Os04g0196200	MSTRG.7228.1	8	5	5	2.38817e-11	2.55274e-09
Os04g0196200	MSTRG.18092.1	8	6	5	1.42826e-10	1.17739e-08
Os04g0196200	MSTRG.18092.2	8	6	5	1.42826e-10	1.17739e-08
Os04g0196200	MSTRG.37830.3	8	5	4	2.301e-08	1.18251e-06
Os04g0196200	MSTRG.40196.1	8	15	3	0.000307405	0.00333723
Os04g0196200	MSTRG.41404.1	8	5	5	2.38817e-11	2.55274e-09
Os04g0196200	MSTRG.37830.1	8	5	4	2.301e-08	1.18251e-06
Os04g0196200	MSTRG.32050.2	8	7	6	6.47371e-13	1.3698e-10
Os04g0196200	MSTRG.14777.1	8	11	3	0.000113675	0.00159153
Os04g0196200	MSTRG.19663.9	8	8	4	3.18153e-07	1.39275e-05
Os01g0971900	MSTRG.14943.1	10	14	10	0	0
Os12g0243050	MSTRG.5637.1	20	23	7	4.48941e-07	1.93149e-05
Os05g0195700	MSTRG.10925.8	3	5	3	1.27905e-07	5.79381e-06
Os05g0195700	MSTRG.29052.1	3	5	3	1.27905e-07	5.79381e-06
Os07g0616100	MSTRG.17830.1	5	9	5	5.37337e-11	5.05706e-09
Os03g0365250	MSTRG.42754.2	9	5	4	4.1375e-08	2.05285e-06
Os03g0365250	MSTRG.18092.1	9	6	3	2.11157e-05	0.000354555
Os01g0921100	MSTRG.42754.2	8	5	3	7.09353e-06	0.000156813
Os01g0908001	MSTRG.14982.1	10	5	3	1.51413e-05	0.000272248
Os01g0908001	MSTRG.32391.1	10	15	6	3.34196e-09	2.04552e-07
Os03g0777600	MSTRG.32391.1	6	15	5	7.60108e-09	4.35508e-07
Os07g0144732	MSTRG.32391.1	5	15	5	1.28065e-09	8.43073e-08
Os07g0160100	MSTRG.5637.1	11	23	5	5.89331e-06	0.000131197
Os11g0606001	MSTRG.1947.1	10	5	4	6.88866e-08	3.2564e-06
Os11g0606001	MSTRG.5637.1	10	23	3	0.00237098	0.00390791
Os11g0606001	MSTRG.17830.1	10	9	3	0.000123769	0.00170696
Os06g0274500	MSTRG.7958.1	6	6	3	5.07175e-06	0.000113118
Os06g0274500	MSTRG.3412.1	6	11	3	4.12355e-05	0.000636821
Os06g0274500	MSTRG.42754.2	6	5	3	2.54327e-06	7.51858e-05
Os06g0274500	MSTRG.34804.3	6	10	5	6.41329e-10	4.49681e-08
Os06g0274500	MSTRG.34804.2	6	10	5	6.41329e-10	4.49681e-08
Os06g0274500	MSTRG.7921.1	6	5	5	2.55873e-12	4.01937e-10
Os06g0274500	MSTRG.1292.4	6	7	5	5.36178e-11	5.05706e-09
Os06g0274500	MSTRG.14777.1	6	11	5	1.1745e-09	7.8148e-08
Os06g0274500	MSTRG.34804.1	6	10	5	6.41329e-10	4.49681e-08
Os06g0274500	MSTRG.1292.5	6	8	5	1.42826e-10	1.17739e-08
Os08g0387200	MSTRG.2701.1	7	5	5	8.95561e-12	1.13296e-09
Os08g0387200	MSTRG.24460.7	7	7	5	1.87257e-10	1.5064e-08
Os08g0387200	MSTRG.7398.1	7	8	5	4.98274e-10	3.56466e-08
Os08g0387200	MSTRG.18168.1	7	7	5	1.87257e-10	1.5064e-08
Os08g0387200	MSTRG.6629.1	7	8	5	4.98274e-10	3.56466e-08
Os08g0387200	MSTRG.28731.2	7	8	5	4.98274e-10	3.56466e-08
Os08g0387200	MSTRG.3412.1	7	11	5	4.08412e-09	2.47439e-07
Os08g0387200	MSTRG.18138.5	7	5	5	8.95561e-12	1.13296e-09
Os08g0387200	MSTRG.28731.1	7	8	5	4.98274e-10	3.56466e-08
Os08g0387200	MSTRG.13425.1	7	9	5	1.11869e-09	7.51117e-08
Os08g0387200	MSTRG.30385.1	7	9	5	1.11869e-09	7.51117e-08
Os08g0387200	MSTRG.4974.5	7	11	5	4.08412e-09	2.47439e-07
Os08g0387200	MSTRG.39751.1	7	6	5	5.36178e-11	5.05706e-09
Os08g0387200	MSTRG.36015.1	7	9	5	1.11869e-09	7.51117e-08
Os08g0387200	MSTRG.18138.2	7	5	5	8.95561e-12	1.13296e-09
Os08g0387200	MSTRG.4623.1	7	8	5	4.98274e-10	3.56466e-08
Os08g0387200	MSTRG.18138.1	7	5	5	8.95561e-12	1.13296e-09
Os08g0387200	MSTRG.35372.1	7	6	5	5.36178e-11	5.05706e-09
Os08g0387200	MSTRG.11969.1	7	7	5	1.87257e-10	1.5064e-08
Os08g0387200	MSTRG.18138.4	7	5	5	8.95561e-12	1.13296e-09
Os08g0387200	MSTRG.29433.1	7	5	5	8.95561e-12	1.13296e-09
Os08g0387200	MSTRG.32391.1	7	15	5	2.63168e-08	1.33651e-06
Os08g0387200	MSTRG.18138.3	7	5	5	8.95561e-12	1.13296e-09
Os08g0387200	MSTRG.37715.1	7	9	5	1.11869e-09	7.51117e-08
Os07g0537200	MSTRG.18092.1	6	6	3	5.07175e-06	0.000113118
Os12g0270300	MSTRG.23160.2	8	10	6	1.92911e-11	2.28924e-09
Os12g0270300	MSTRG.28732.3	8	5	5	2.38817e-11	2.55274e-09
Os12g0270300	MSTRG.23160.1	8	10	6	1.92911e-11	2.28924e-09
Os01g0264400	MSTRG.14982.1	9	5	3	1.06196e-05	0.00019289
Os01g0264400	MSTRG.32391.1	9	15	6	1.35031e-09	8.79229e-08
Os02g0282000	MSTRG.32391.1	7	15	5	2.63168e-08	1.33651e-06
Os04g0558700	MSTRG.5637.1	21	23	12	3.77476e-15	1.47101e-12
Os03g0332201	MSTRG.42754.2	7	5	3	4.44208e-06	9.98208e-05
Os02g0712550	MSTRG.32391.1	7	15	6	1.14812e-10	9.9371e-09
Os01g0170500	MSTRG.32391.1	6	15	5	7.60108e-09	4.35508e-07
Os02g0631801	MSTRG.42754.2	5	5	4	1.64869e-09	1.05709e-07
Os06g0574100	MSTRG.41603.1	8	7	5	4.98274e-10	3.56466e-08
Os06g0681600	MSTRG.5637.1	14	23	6	8.61235e-07	3.55068e-05
Os12g0104300	MSTRG.2338.1	6	6	6	3.33067e-15	1.3383e-12
Os11g0233201	MSTRG.11355.1	6	4	4	9.90235e-10	6.80179e-08
Os06g0105350	MSTRG.23160.2	7	10	6	4.84435e-12	7.27351e-10
Os06g0105350	MSTRG.28732.3	7	5	5	8.95561e-12	1.13296e-09
Os06g0105350	MSTRG.23160.1	7	10	6	4.84435e-12	7.27351e-10
Os08g0137300	MSTRG.18092.1	9	6	4	1.23483e-07	5.72729e-06
Os09g0123500	MSTRG.32391.1	5	15	3	5.6853e-05	0.000854359
Os06g0167500	MSTRG.32391.1	10	15	6	3.34196e-09	2.04552e-07
Os03g0268400	MSTRG.5637.1	15	23	10	1.50546e-13	4.06787e-11
Os07g0508200	MSTRG.41603.1	5	7	3	4.44208e-06	9.98208e-05
Os07g0134600	MSTRG.34501.1	3	3	3	1.27905e-08	6.83598e-07
Os07g0134600	MSTRG.41715.1	3	3	3	1.27905e-08	6.83598e-07
Os10g0160600	MSTRG.5637.1	7	23	7	7.35823e-12	1.08898e-09
Os03g0439900	MSTRG.5637.1	8	23	5	7.5769e-07	3.13462e-05
Os07g0123000	MSTRG.18092.1	4	6	3	1.02027e-06	4.1501e-05
Os11g0197725	MSTRG.17830.1	7	9	6	1.93989e-12	3.6033e-10
Os08g0437050	MSTRG.42754.2	27	5	3	0.000356951	0.00333723
Os08g0437050	MSTRG.17830.1	27	9	5	3.94057e-06	8.93927e-05
Os09g0325300	MSTRG.18092.1	4	6	3	1.02027e-06	4.1501e-05
Os12g0264500	MSTRG.32391.1	11	15	5	5.54336e-07	2.33379e-05
Os12g0540000	MSTRG.18092.1	7	6	4	3.44435e-08	1.73334e-06
Os03g0641500	MSTRG.17830.1	9	9	7	3.87468e-14	1.234e-11
Os02g0663100	MSTRG.23160.2	7	10	6	4.84435e-12	7.27351e-10
Os02g0663100	MSTRG.28732.3	7	5	5	8.95561e-12	1.13296e-09
Os02g0663100	MSTRG.23160.1	7	10	6	4.84435e-12	7.27351e-10
Os02g0728700	MSTRG.32391.1	6	15	5	7.60108e-09	4.35508e-07
Os09g0260900	MSTRG.14982.1	16	5	4	5.93292e-07	2.49036e-05
Os09g0260900	MSTRG.32391.1	16	15	6	1.19944e-07	5.59494e-06
Os02g0526650	MSTRG.5637.1	15	23	11	1.11022e-15	4.91984e-13
Os04g0413200	MSTRG.5637.1	20	23	16	0	0
Os02g0771600	MSTRG.5637.1	29	23	16	0	0
Os09g0572700	MSTRG.17830.1	5	9	4	4.1375e-08	2.05285e-06
Os08g0176633	MSTRG.32391.1	7	15	5	2.63168e-08	1.33651e-06
Os07g0474700	MSTRG.1947.1	9	5	5	5.37337e-11	5.05706e-09
Os07g0474700	MSTRG.17830.1	9	9	3	8.71463e-05	0.00127669
Os06g0241100	MSTRG.1947.1	8	5	4	2.301e-08	1.18251e-06
Os06g0241100	MSTRG.17830.1	8	9	3	5.84379e-05	0.000876648
Os06g0140200	MSTRG.5637.1	8	23	7	5.77969e-11	5.35818e-09
Os12g0441600	MSTRG.23319.1	11	14	10	0	0
Os05g0185767	MSTRG.11355.1	10	4	3	6.09787e-06	0.000135478
Os01g0186400	MSTRG.32391.1	7	15	6	1.14812e-10	9.9371e-09
Os04g0539701	MSTRG.18092.1	4	6	3	1.02027e-06	4.1501e-05
Os01g0882000	MSTRG.5637.1	12	23	6	2.75339e-07	1.21321e-05
Os03g0727000	MSTRG.17830.1	5	9	3	1.06196e-05	0.00019289
Os06g0601500	MSTRG.2701.1	6	5	5	2.55873e-12	4.01937e-10
Os06g0601500	MSTRG.24460.7	6	7	5	5.36178e-11	5.05706e-09
Os06g0601500	MSTRG.7398.1	6	8	5	1.42826e-10	1.17739e-08
Os06g0601500	MSTRG.18168.1	6	7	5	5.36178e-11	5.05706e-09
Os06g0601500	MSTRG.6629.1	6	8	5	1.42826e-10	1.17739e-08
Os06g0601500	MSTRG.28731.2	6	8	5	1.42826e-10	1.17739e-08
Os06g0601500	MSTRG.3412.1	6	11	5	1.1745e-09	7.8148e-08
Os06g0601500	MSTRG.18138.5	6	5	5	2.55873e-12	4.01937e-10
Os06g0601500	MSTRG.28731.1	6	8	5	1.42826e-10	1.17739e-08
Os06g0601500	MSTRG.13425.1	6	9	5	3.21012e-10	2.41927e-08
Os06g0601500	MSTRG.30385.1	6	9	5	3.21012e-10	2.41927e-08
Os06g0601500	MSTRG.4974.5	6	11	5	1.1745e-09	7.8148e-08
Os06g0601500	MSTRG.39751.1	6	6	5	1.5336e-11	1.86996e-09
Os06g0601500	MSTRG.36015.1	6	9	5	3.21012e-10	2.41927e-08
Os06g0601500	MSTRG.18138.2	6	5	5	2.55873e-12	4.01937e-10
Os06g0601500	MSTRG.4623.1	6	8	5	1.42826e-10	1.17739e-08
Os06g0601500	MSTRG.18138.1	6	5	5	2.55873e-12	4.01937e-10
Os06g0601500	MSTRG.35372.1	6	6	5	1.5336e-11	1.86996e-09
Os06g0601500	MSTRG.11969.1	6	7	5	5.36178e-11	5.05706e-09
Os06g0601500	MSTRG.18138.4	6	5	5	2.55873e-12	4.01937e-10
Os06g0601500	MSTRG.29433.1	6	5	5	2.55873e-12	4.01937e-10
Os06g0601500	MSTRG.32391.1	6	15	5	7.60108e-09	4.35508e-07
Os06g0601500	MSTRG.18138.3	6	5	5	2.55873e-12	4.01937e-10
Os06g0601500	MSTRG.37715.1	6	9	5	3.21012e-10	2.41927e-08
Os06g0710700	MSTRG.10925.8	5	5	4	1.64869e-09	1.05709e-07
Os06g0710700	MSTRG.29052.1	5	5	4	1.64869e-09	1.05709e-07
Os06g0593800	MSTRG.2701.1	8	5	5	2.38817e-11	2.55274e-09
Os06g0593800	MSTRG.24460.7	8	7	6	6.47371e-13	1.3698e-10
Os06g0593800	MSTRG.7398.1	8	8	6	2.58371e-12	4.01937e-10
Os06g0593800	MSTRG.18168.1	8	7	6	6.47371e-13	1.3698e-10
Os06g0593800	MSTRG.6629.1	8	8	5	1.32443e-09	8.66008e-08
Os06g0593800	MSTRG.28731.2	8	8	6	2.58371e-12	4.01937e-10
Os06g0593800	MSTRG.3412.1	8	11	6	4.23458e-11	4.44671e-09
Os06g0593800	MSTRG.18138.5	8	5	5	2.38817e-11	2.55274e-09
Os06g0593800	MSTRG.28731.1	8	8	6	2.58371e-12	4.01937e-10
Os06g0593800	MSTRG.13425.1	8	9	5	2.97029e-09	1.82162e-07
Os06g0593800	MSTRG.30385.1	8	9	6	7.73359e-12	1.09641e-09
Os06g0593800	MSTRG.4974.5	8	11	7	7.88258e-14	2.39722e-11
Os06g0593800	MSTRG.39751.1	8	6	6	9.27036e-14	2.61899e-11
Os06g0593800	MSTRG.36015.1	8	9	6	7.73359e-12	1.09641e-09
Os06g0593800	MSTRG.18138.2	8	5	5	2.38817e-11	2.55274e-09
Os06g0593800	MSTRG.4623.1	8	8	7	1.9984e-15	8.53857e-13
Os06g0593800	MSTRG.18138.1	8	5	5	2.38817e-11	2.55274e-09
Os06g0593800	MSTRG.35372.1	8	6	6	9.27036e-14	2.61899e-11
Os06g0593800	MSTRG.11969.1	8	7	7	2.22045e-16	1.05641e-13
Os06g0593800	MSTRG.18138.4	8	5	5	2.38817e-11	2.55274e-09
Os06g0593800	MSTRG.29433.1	8	5	5	2.38817e-11	2.55274e-09
Os06g0593800	MSTRG.32391.1	8	15	5	6.94203e-08	3.27364e-06
Os06g0593800	MSTRG.18138.3	8	5	5	2.38817e-11	2.55274e-09
Os06g0593800	MSTRG.37715.1	8	9	6	7.73359e-12	1.09641e-09
Os07g0489950	MSTRG.14982.1	9	5	3	1.06196e-05	0.00019289
Os07g0489950	MSTRG.32391.1	9	15	5	1.54508e-07	6.96223e-06
Os08g0498600	MSTRG.41603.1	6	7	5	5.36178e-11	5.05706e-09
Os06g0262501	MSTRG.14982.1	9	5	3	1.06196e-05	0.00019289
Os06g0262501	MSTRG.32391.1	9	15	5	1.54508e-07	6.96223e-06
Os05g0172000	MSTRG.18092.1	13	6	3	7.10575e-05	0.00104415
Os12g0122400	MSTRG.17830.1	10	9	5	1.32509e-08	7.00715e-07
Os09g0401000	MSTRG.2701.1	6	5	5	2.55873e-12	4.01937e-10
Os09g0401000	MSTRG.24460.7	6	7	6	2.30926e-14	7.7693e-12
Os09g0401000	MSTRG.7398.1	6	8	6	9.27036e-14	2.61899e-11
Os09g0401000	MSTRG.18168.1	6	7	6	2.30926e-14	7.7693e-12
Os09g0401000	MSTRG.6629.1	6	8	5	1.42826e-10	1.17739e-08
Os09g0401000	MSTRG.28731.2	6	8	6	9.27036e-14	2.61899e-11
Os09g0401000	MSTRG.3412.1	6	11	6	1.52922e-12	2.97213e-10
Os09g0401000	MSTRG.18138.5	6	5	5	2.55873e-12	4.01937e-10
Os09g0401000	MSTRG.28731.1	6	8	6	9.27036e-14	2.61899e-11
Os09g0401000	MSTRG.13425.1	6	9	5	3.21012e-10	2.41927e-08
Os09g0401000	MSTRG.30385.1	6	9	5	3.21012e-10	2.41927e-08
Os09g0401000	MSTRG.4974.5	6	11	6	1.52922e-12	2.97213e-10
Os09g0401000	MSTRG.39751.1	6	6	6	3.33067e-15	1.3383e-12
Os09g0401000	MSTRG.36015.1	6	9	6	2.78e-13	6.95444e-11
Os09g0401000	MSTRG.18138.2	6	5	5	2.55873e-12	4.01937e-10
Os09g0401000	MSTRG.4623.1	6	8	6	9.27036e-14	2.61899e-11
Os09g0401000	MSTRG.18138.1	6	5	5	2.55873e-12	4.01937e-10
Os09g0401000	MSTRG.35372.1	6	6	6	3.33067e-15	1.3383e-12
Os09g0401000	MSTRG.11969.1	6	7	6	2.30926e-14	7.7693e-12
Os09g0401000	MSTRG.18138.4	6	5	5	2.55873e-12	4.01937e-10
Os09g0401000	MSTRG.29433.1	6	5	5	2.55873e-12	4.01937e-10
Os09g0401000	MSTRG.32391.1	6	15	5	7.60108e-09	4.35508e-07
Os09g0401000	MSTRG.18138.3	6	5	5	2.55873e-12	4.01937e-10
Os09g0401000	MSTRG.37715.1	6	9	6	2.78e-13	6.95444e-11
Os08g0522300	MSTRG.32391.1	6	15	5	7.60108e-09	4.35508e-07
Os04g0253601	MSTRG.1947.1	9	5	3	1.06196e-05	0.00019289
Os04g0253601	MSTRG.17830.1	9	9	4	1.02122e-06	4.15067e-05
Os04g0681600	MSTRG.23319.1	11	14	10	0	0
Os02g0617100	MSTRG.41603.1	3	7	3	4.47669e-07	1.92709e-05
Os02g0313500	MSTRG.32391.1	10	15	6	3.34196e-09	2.04552e-07
Os01g0929800	MSTRG.5637.1	3	23	3	2.2652e-05	0.000380105
Os09g0109800	MSTRG.5637.1	15	23	8	8.69224e-10	6.00248e-08
Os09g0109800	MSTRG.32391.1	15	15	6	7.57279e-08	3.56784e-06
Os07g0471050	MSTRG.17830.1	7	9	4	2.86635e-07	1.26083e-05
Os01g0824600	MSTRG.32391.1	5	15	5	1.28065e-09	8.43073e-08
Os06g0161300	MSTRG.42754.2	3	5	3	1.27905e-07	5.79381e-06
Os04g0451200	MSTRG.32391.1	6	15	5	7.60108e-09	4.35508e-07
Os03g0339900	MSTRG.44467.1	14	7	6	6.89646e-11	6.35552e-09
Os03g0339900	MSTRG.5637.2	14	23	10	5.09592e-14	1.60319e-11
Os03g0339900	MSTRG.16632.1	14	20	7	7.19414e-09	4.16189e-07
Os03g0339900	MSTRG.5637.1	14	23	10	5.09592e-14	1.60319e-11
Os03g0339900	MSTRG.26074.1	14	28	9	4.49716e-11	4.71925e-09
Os03g0339900	MSTRG.16893.1	14	15	6	4.58988e-08	2.27658e-06
Os03g0339900	MSTRG.42500.4	14	22	12	0	0
Os03g0339900	MSTRG.42549.1	14	11	6	4.39172e-09	2.65971e-07
Os03g0339900	MSTRG.12888.1	14	20	6	3.39784e-07	1.48201e-05
Os03g0339900	MSTRG.2664.1	14	15	8	5.73153e-12	8.57236e-10
Os03g0339900	MSTRG.22663.6	14	17	9	1.68976e-13	4.44958e-11
Os06g0656500	MSTRG.1947.1	12	5	3	2.76511e-05	0.000461691
Os06g0656500	MSTRG.17830.1	12	9	4	3.94972e-06	8.95873e-05
Os01g0785700	MSTRG.14982.1	10	5	3	1.51413e-05	0.000272248
Os01g0785700	MSTRG.32391.1	10	15	7	2.25509e-11	2.55274e-09
Os03g0229575	MSTRG.16647.1	9	8	7	8.65974e-15	3.2759e-12
Os03g0229575	MSTRG.16632.1	9	20	5	7.80445e-07	3.22446e-05
Os03g0229575	MSTRG.7958.1	9	6	3	2.11157e-05	0.000354555
Os03g0229575	MSTRG.12363.1	9	5	4	4.1375e-08	2.05285e-06
Os03g0229575	MSTRG.34804.3	9	10	3	0.000123769	0.00170696
Os03g0229575	MSTRG.10479.20	9	8	6	7.73359e-12	1.09641e-09
Os03g0229575	MSTRG.7228.1	9	5	4	4.1375e-08	2.05285e-06
Os03g0229575	MSTRG.34804.2	9	10	3	0.000123769	0.00170696
Os03g0229575	MSTRG.18092.1	9	6	4	1.23483e-07	5.72729e-06
Os03g0229575	MSTRG.18092.2	9	6	4	1.23483e-07	5.72729e-06
Os03g0229575	MSTRG.37830.3	9	5	5	5.37337e-11	5.05706e-09
Os03g0229575	MSTRG.40196.1	9	15	3	0.000455747	0.00333723
Os03g0229575	MSTRG.41404.1	9	5	4	4.1375e-08	2.05285e-06
Os03g0229575	MSTRG.37830.1	9	5	5	5.37337e-11	5.05706e-09
Os03g0229575	MSTRG.1292.4	9	7	3	3.67376e-05	0.000568942
Os03g0229575	MSTRG.32050.2	9	7	5	1.11869e-09	7.51117e-08
Os03g0229575	MSTRG.24793.9	9	4	3	4.27267e-06	9.67567e-05
Os03g0229575	MSTRG.14777.1	9	11	5	2.4188e-08	1.23609e-06
Os03g0229575	MSTRG.34804.1	9	10	3	0.000123769	0.00170696
Os03g0229575	MSTRG.22663.6	9	17	3	0.000673166	0.00333723
Os03g0229575	MSTRG.1292.5	9	8	3	5.84379e-05	0.000876648
Os03g0229575	MSTRG.19663.9	9	8	4	5.703e-07	2.3958e-05
Os09g0333600	MSTRG.5637.1	21	23	8	2.47283e-08	1.26287e-06
Os10g0568300	MSTRG.17830.1	4	9	3	4.27267e-06	9.67567e-05
Os06g0286310	MSTRG.32391.1	5	15	3	5.6853e-05	0.000854359
Os08g0486266	MSTRG.41603.1	13	7	3	0.000123146	0.00169942
Os08g0486266	MSTRG.32391.1	13	15	4	5.81146e-05	0.000872811
Os07g0189800	MSTRG.42754.2	9	5	3	1.06196e-05	0.00019289
Os03g0425300	MSTRG.42754.2	12	5	4	1.62038e-07	7.26566e-06
Os09g0247101	MSTRG.28732.3	11	5	5	1.97024e-10	1.5379e-08
Os03g0376350	MSTRG.32391.1	9	15	5	1.54508e-07	6.96223e-06
Os02g0589600	MSTRG.41603.1	6	7	5	5.36178e-11	5.05706e-09
Os12g0583801	MSTRG.5637.1	25	23	9	4.65608e-09	2.79904e-07
Os06g0673300	MSTRG.5637.1	7	23	6	2.2949e-09	1.43465e-07
Os09g0271000	MSTRG.18092.1	8	6	4	6.87442e-08	3.2564e-06
Os09g0366500	MSTRG.41603.1	4	7	3	1.78374e-06	6.97572e-05
Os09g0392666	MSTRG.14982.1	6	5	5	2.55873e-12	4.01937e-10
Os02g0518400	MSTRG.28732.3	5	5	5	4.26437e-13	9.44856e-11
Os01g0923900	MSTRG.28732.3	6	5	5	2.55873e-12	4.01937e-10
Os12g0115300	MSTRG.2694.1	4	4	3	2.04451e-07	9.14551e-06
Os12g0115300	MSTRG.36897.2	4	13	3	1.44908e-05	0.000261612
Os12g0126600	MSTRG.5637.1	21	23	6	1.36045e-05	0.000246616
Os12g0126600	MSTRG.42754.2	21	5	4	1.94081e-06	7.51858e-05
Os12g0126600	MSTRG.18092.1	21	6	3	0.000322759	0.00333723
Os10g0543500	MSTRG.17830.1	8	9	7	8.65974e-15	3.2759e-12
Os02g0527700	MSTRG.18092.1	3	6	3	2.55811e-07	1.1278e-05
Os01g0544200	MSTRG.14982.1	7	5	4	1.15169e-08	6.44628e-07
Os02g0319300	MSTRG.18092.1	4	6	3	1.02027e-06	4.1501e-05
Os03g0259300	MSTRG.32391.1	7	15	5	2.63168e-08	1.33651e-06
Os07g0218600	MSTRG.32391.1	7	15	5	2.63168e-08	1.33651e-06
Os05g0469600	MSTRG.28732.3	5	5	5	4.26437e-13	9.44856e-11
Os12g0426750	MSTRG.42754.2	4	5	4	3.30078e-10	2.46129e-08
Os06g0578100	MSTRG.5637.1	8	23	7	5.77969e-11	5.35818e-09
Os06g0340200	MSTRG.18092.1	8	6	4	6.87442e-08	3.2564e-06
Os01g0819233	MSTRG.42754.2	9	5	4	4.1375e-08	2.05285e-06
Os04g0526200	MSTRG.14982.1	5	5	3	1.27411e-06	5.08524e-05
Os07g0296000	MSTRG.11355.1	11	4	4	2.17852e-08	1.13613e-06
Os02g0179250	MSTRG.41603.1	26	7	5	5.62723e-07	2.36782e-05
Os02g0179250	MSTRG.32391.1	26	15	3	0.0115589	0.0129333
Os09g0572400	MSTRG.16647.1	10	8	3	8.30771e-05	0.00121776
Os09g0572400	MSTRG.16632.1	10	20	4	6.07669e-05	0.000905542
Os09g0572400	MSTRG.7958.1	10	6	5	6.41329e-10	4.49681e-08
Os09g0572400	MSTRG.3412.1	10	11	3	0.000239823	0.00317862
Os09g0572400	MSTRG.42754.2	10	5	5	1.07467e-10	9.36935e-09
Os09g0572400	MSTRG.34804.3	10	10	6	1.43398e-10	1.17739e-08
Os09g0572400	MSTRG.10479.20	10	8	4	9.46552e-07	3.88899e-05
Os09g0572400	MSTRG.7228.1	10	5	3	1.51413e-05	0.000272248
Os09g0572400	MSTRG.34804.2	10	10	6	1.43398e-10	1.17739e-08
Os09g0572400	MSTRG.7921.1	10	5	5	1.07467e-10	9.36935e-09
Os09g0572400	MSTRG.18092.1	10	6	3	3.00773e-05	0.000497968
Os09g0572400	MSTRG.18092.2	10	6	3	3.00773e-05	0.000497968
Os09g0572400	MSTRG.37830.3	10	5	3	1.51413e-05	0.000272248
Os09g0572400	MSTRG.40196.1	10	15	3	0.000643495	0.00333723
Os09g0572400	MSTRG.37830.1	10	5	3	1.51413e-05	0.000272248
Os09g0572400	MSTRG.1292.4	10	7	6	4.84435e-12	7.27351e-10
Os09g0572400	MSTRG.14777.1	10	11	9	0	0
Os09g0572400	MSTRG.34804.1	10	10	6	1.43398e-10	1.17739e-08
Os09g0572400	MSTRG.22663.6	10	17	3	0.000948629	0.00333723
Os09g0572400	MSTRG.1292.5	10	8	6	1.92911e-11	2.28924e-09
Os09g0572400	MSTRG.19663.9	10	8	3	8.30771e-05	0.00121776
Os09g0339601	MSTRG.11355.1	8	4	4	4.6211e-09	2.78017e-07
Os12g0639800	MSTRG.18092.1	8	6	4	6.87442e-08	3.2564e-06
Os01g0202500	MSTRG.32391.1	7	15	5	2.63168e-08	1.33651e-06
Os02g0522300	MSTRG.14982.1	4	5	3	5.10631e-07	2.15155e-05
Os03g0752300	MSTRG.23319.1	10	14	10	0	0
Os02g0628600	MSTRG.35555.1	6	5	4	4.94094e-09	2.91161e-07
Os02g0628600	MSTRG.36083.2	6	4	4	9.90235e-10	6.80179e-08
Os06g0610350	MSTRG.5637.1	19	23	11	6.17284e-14	1.93414e-11
Os10g0475000	MSTRG.5637.1	6	23	4	8.42748e-06	0.000180939
Os01g0860400	MSTRG.18092.1	6	6	3	5.07175e-06	0.000113118
Os03g0421100	MSTRG.32391.1	7	15	3	0.000194388	0.00262374
Os08g0495300	MSTRG.32391.1	7	15	5	2.63168e-08	1.33651e-06
Os07g0471683	MSTRG.14982.1	8	5	3	7.09353e-06	0.000156813
Os07g0471683	MSTRG.32391.1	8	15	5	6.94203e-08	3.27364e-06
Os10g0556200	MSTRG.22663.6	3	17	3	8.69757e-06	0.000180939
Os11g0550300	MSTRG.5637.1	12	23	7	5.31663e-09	3.12706e-07
Os01g0274901	MSTRG.5637.1	29	23	15	0	0
Os06g0633300	MSTRG.42754.2	5	5	3	1.27411e-06	5.08524e-05
Os01g0694500	MSTRG.5637.1	9	23	6	2.65079e-08	1.34358e-06
Os03g0683900	MSTRG.32391.1	11	15	8	3.22631e-13	8.03206e-11
Os02g0116000	MSTRG.42754.2	3	5	3	1.27905e-07	5.79381e-06
Os04g0474500	MSTRG.32391.1	5	15	5	1.28065e-09	8.43073e-08
Os12g0552800	MSTRG.28732.3	6	5	5	2.55873e-12	4.01937e-10
Os06g0176100	MSTRG.5637.1	17	23	6	3.35086e-06	7.61041e-05
Os12g0583500	MSTRG.32391.1	7	15	3	0.000194388	0.00262374
Os05g0580600	MSTRG.17830.1	9	9	5	6.65425e-09	3.85819e-07
Os03g0747300	MSTRG.32391.1	9	15	5	1.54508e-07	6.96223e-06
Os07g0596950	MSTRG.32391.1	8	15	6	4.54656e-10	3.34837e-08
Os11g0227700	MSTRG.18092.1	6	6	3	5.07175e-06	0.000113118
Os05g0417100	MSTRG.28732.3	6	5	5	2.55873e-12	4.01937e-10
Os05g0127200	MSTRG.2701.1	10	5	5	1.07467e-10	9.36935e-09
Os05g0127200	MSTRG.24460.7	10	7	5	2.23254e-09	1.39905e-07
Os05g0127200	MSTRG.7398.1	10	8	5	5.92129e-09	3.45778e-07
Os05g0127200	MSTRG.18168.1	10	7	5	2.23254e-09	1.39905e-07
Os05g0127200	MSTRG.6629.1	10	8	6	1.92911e-11	2.28924e-09
Os05g0127200	MSTRG.28731.2	10	8	5	5.92129e-09	3.45778e-07
Os05g0127200	MSTRG.3412.1	10	11	5	4.80619e-08	2.37173e-06
Os05g0127200	MSTRG.18138.5	10	5	5	1.07467e-10	9.36935e-09
Os05g0127200	MSTRG.28731.1	10	8	5	5.92129e-09	3.45778e-07
Os05g0127200	MSTRG.13425.1	10	9	5	1.32509e-08	7.00715e-07
Os05g0127200	MSTRG.30385.1	10	9	5	1.32509e-08	7.00715e-07
Os05g0127200	MSTRG.4974.5	10	11	5	4.80619e-08	2.37173e-06
Os05g0127200	MSTRG.39751.1	10	6	5	6.41329e-10	4.49681e-08
Os05g0127200	MSTRG.36015.1	10	9	5	1.32509e-08	7.00715e-07
Os05g0127200	MSTRG.18138.2	10	5	5	1.07467e-10	9.36935e-09
Os05g0127200	MSTRG.4623.1	10	8	5	5.92129e-09	3.45778e-07
Os05g0127200	MSTRG.18138.1	10	5	5	1.07467e-10	9.36935e-09
Os05g0127200	MSTRG.35372.1	10	6	5	6.41329e-10	4.49681e-08
Os05g0127200	MSTRG.11969.1	10	7	5	2.23254e-09	1.39905e-07
Os05g0127200	MSTRG.18138.4	10	5	5	1.07467e-10	9.36935e-09
Os05g0127200	MSTRG.29433.1	10	5	5	1.07467e-10	9.36935e-09
Os05g0127200	MSTRG.32391.1	10	15	9	2.22045e-16	1.05641e-13
Os05g0127200	MSTRG.18138.3	10	5	5	1.07467e-10	9.36935e-09
Os05g0127200	MSTRG.37715.1	10	9	5	1.32509e-08	7.00715e-07
Os05g0127200	MSTRG.36897.2	10	13	3	0.000410053	0.00333723
Os02g0807700	MSTRG.18092.1	7	6	4	3.44435e-08	1.73334e-06
Os08g0493900	MSTRG.28732.3	6	5	5	2.55873e-12	4.01937e-10
Os06g0693600	MSTRG.18092.1	7	6	4	3.44435e-08	1.73334e-06
Os08g0205650	MSTRG.42754.2	3	5	3	1.27905e-07	5.79381e-06
Os11g0475000	MSTRG.5637.1	9	23	7	2.55359e-10	1.98327e-08
Os06g0200700	MSTRG.32391.1	4	15	3	2.30085e-05	0.000385793
Os11g0167300	MSTRG.22188.3	4	6	3	1.02027e-06	4.1501e-05
Os05g0555600	MSTRG.23319.1	10	14	10	0	0
Os10g0406701	MSTRG.14982.1	23	5	4	2.86545e-06	7.51858e-05
Os10g0406701	MSTRG.32391.1	23	15	10	1.50546e-13	4.06787e-11
Os03g0817800	MSTRG.13425.1	3	9	3	1.07441e-06	4.34522e-05
Os07g0572100	MSTRG.32391.1	8	15	6	4.54656e-10	3.34837e-08
Os04g0468000	MSTRG.42754.2	9	5	3	1.06196e-05	0.00019289
Os08g0367850	MSTRG.32391.1	4	15	3	2.30085e-05	0.000385793
Os07g0595700	MSTRG.32391.1	10	15	6	3.34196e-09	2.04552e-07
Os10g0130500	MSTRG.14982.1	7	5	4	1.15169e-08	6.44628e-07
Os10g0130500	MSTRG.32391.1	7	15	3	0.000194388	0.00262374
Os05g0114950	MSTRG.42754.2	9	5	3	1.06196e-05	0.00019289
Os06g0715400	MSTRG.5637.1	14	23	6	8.61235e-07	3.55068e-05
Os12g0234000	MSTRG.18092.1	9	6	3	2.11157e-05	0.000354555
Os10g0134250	MSTRG.5637.1	11	23	7	2.25638e-09	1.41171e-07
Os10g0476900	MSTRG.42754.2	10	5	5	1.07467e-10	9.36935e-09
Os03g0714400	MSTRG.5637.1	14	23	8	4.12827e-10	3.05191e-08
Os12g0135000	MSTRG.32391.1	9	15	3	0.000455747	0.00333723
Os12g0221400	MSTRG.18092.1	5	6	4	4.94094e-09	2.91161e-07
Os02g0662700	MSTRG.23160.2	7	10	6	4.84435e-12	7.27351e-10
Os02g0662700	MSTRG.28732.3	7	5	5	8.95561e-12	1.13296e-09
Os02g0662700	MSTRG.23160.1	7	10	6	4.84435e-12	7.27351e-10
Os03g0651900	MSTRG.2701.1	5	5	5	4.26437e-13	9.44856e-11
Os03g0651900	MSTRG.24460.7	5	7	5	8.95561e-12	1.13296e-09
Os03g0651900	MSTRG.7398.1	5	8	5	2.38817e-11	2.55274e-09
Os03g0651900	MSTRG.18168.1	5	7	5	8.95561e-12	1.13296e-09
Os03g0651900	MSTRG.6629.1	5	8	5	2.38817e-11	2.55274e-09
Os03g0651900	MSTRG.28731.2	5	8	5	2.38817e-11	2.55274e-09
Os03g0651900	MSTRG.3412.1	5	11	5	1.97024e-10	1.5379e-08
Os03g0651900	MSTRG.18138.5	5	5	5	4.26437e-13	9.44856e-11
Os03g0651900	MSTRG.28731.1	5	8	5	2.38817e-11	2.55274e-09
Os03g0651900	MSTRG.13425.1	5	9	5	5.37337e-11	5.05706e-09
Os03g0651900	MSTRG.30385.1	5	9	5	5.37337e-11	5.05706e-09
Os03g0651900	MSTRG.4974.5	5	11	5	1.97024e-10	1.5379e-08
Os03g0651900	MSTRG.39751.1	5	6	5	2.55873e-12	4.01937e-10
Os03g0651900	MSTRG.36015.1	5	9	5	5.37337e-11	5.05706e-09
Os03g0651900	MSTRG.18138.2	5	5	5	4.26437e-13	9.44856e-11
Os03g0651900	MSTRG.4623.1	5	8	5	2.38817e-11	2.55274e-09
Os03g0651900	MSTRG.18138.1	5	5	5	4.26437e-13	9.44856e-11
Os03g0651900	MSTRG.35372.1	5	6	5	2.55873e-12	4.01937e-10
Os03g0651900	MSTRG.11969.1	5	7	5	8.95561e-12	1.13296e-09
Os03g0651900	MSTRG.18138.4	5	5	5	4.26437e-13	9.44856e-11
Os03g0651900	MSTRG.29433.1	5	5	5	4.26437e-13	9.44856e-11
Os03g0651900	MSTRG.32391.1	5	15	5	1.28065e-09	8.43073e-08
Os03g0651900	MSTRG.18138.3	5	5	5	4.26437e-13	9.44856e-11
Os03g0651900	MSTRG.37715.1	5	9	5	5.37337e-11	5.05706e-09
Os04g0360500	MSTRG.17830.1	6	9	4	1.23483e-07	5.72729e-06
Os06g0303800	MSTRG.18092.1	8	6	5	1.42826e-10	1.17739e-08
Os04g0290450	MSTRG.42754.2	9	5	4	4.1375e-08	2.05285e-06
Os01g0513200	MSTRG.14982.1	11	5	4	1.08138e-07	5.04727e-06
Os01g0513200	MSTRG.32391.1	11	15	7	6.14502e-11	5.68667e-09
Os10g0541000	MSTRG.18092.1	5	6	3	2.54327e-06	7.51858e-05
Os10g0339182	MSTRG.42754.2	6	5	4	4.94094e-09	2.91161e-07
Os03g0829466	MSTRG.42754.2	10	5	4	6.88866e-08	3.2564e-06
Os01g0842500	MSTRG.10925.8	6	5	3	2.54327e-06	7.51858e-05
Os01g0842500	MSTRG.29052.1	6	5	3	2.54327e-06	7.51858e-05
Os01g0691000	MSTRG.17830.1	6	9	4	1.23483e-07	5.72729e-06
Os10g0404500	MSTRG.42754.2	4	5	3	5.10631e-07	2.15155e-05
Os03g0227500	MSTRG.32391.1	6	15	5	7.60108e-09	4.35508e-07
Os08g0421000	MSTRG.41603.1	12	7	3	9.50983e-05	0.00136926
Os01g0107000	MSTRG.32391.1	5	15	5	1.28065e-09	8.43073e-08
Os10g0551200	MSTRG.28732.3	8	5	5	2.38817e-11	2.55274e-09
Os10g0547200	MSTRG.42754.2	7	5	4	1.15169e-08	6.44628e-07
Os04g0294401	MSTRG.5637.1	9	23	7	2.55359e-10	1.98327e-08
Os08g0434566	MSTRG.5637.1	9	23	8	1.35048e-12	2.7167e-10
Os01g0877001	MSTRG.18092.1	5	6	3	2.54327e-06	7.51858e-05
Os04g0472200	MSTRG.42754.2	6	5	4	4.94094e-09	2.91161e-07
Os06g0284200	MSTRG.18092.1	6	6	3	5.07175e-06	0.000113118
Os08g0472600	MSTRG.18092.1	7	6	5	5.36178e-11	5.05706e-09
Os08g0235651	MSTRG.5637.1	6	23	6	3.3415e-10	2.48687e-08
Os08g0483200	MSTRG.32391.1	9	15	7	6.82743e-12	1.0143e-09
Os04g0651500	MSTRG.14982.1	6	5	3	2.54327e-06	7.51858e-05
Os03g0363500	MSTRG.32391.1	7	15	5	2.63168e-08	1.33651e-06
Os03g0758950	MSTRG.28732.3	6	5	5	2.55873e-12	4.01937e-10
Os06g0287500	MSTRG.32391.1	6	15	5	7.60108e-09	4.35508e-07
Os09g0283200	MSTRG.14982.1	5	5	3	1.27411e-06	5.08524e-05
Os09g0411600	MSTRG.32391.1	6	15	5	7.60108e-09	4.35508e-07
Os01g0220900	MSTRG.18092.1	10	6	4	2.05377e-07	9.14551e-06
Os11g0116000	MSTRG.32391.1	6	15	4	1.3211e-06	5.26333e-05
Os01g0728000	MSTRG.17830.1	7	9	6	1.93989e-12	3.6033e-10
Os02g0652100	MSTRG.2701.1	11	5	5	1.97024e-10	1.5379e-08
Os02g0652100	MSTRG.24460.7	11	7	6	1.06456e-11	1.31773e-09
Os02g0652100	MSTRG.7398.1	11	8	6	4.23458e-11	4.44671e-09
Os02g0652100	MSTRG.16647.1	11	8	5	1.08204e-08	6.13614e-07
Os02g0652100	MSTRG.18168.1	11	7	6	1.06456e-11	1.31773e-09
Os02g0652100	MSTRG.16632.1	11	20	3	0.002107	0.00390791
Os02g0652100	MSTRG.6629.1	11	8	5	1.08204e-08	6.13614e-07
Os02g0652100	MSTRG.28731.2	11	8	6	4.23458e-11	4.44671e-09
Os02g0652100	MSTRG.7958.1	11	6	3	4.12355e-05	0.000636821
Os02g0652100	MSTRG.3412.1	11	11	6	6.87098e-10	4.79389e-08
Os02g0652100	MSTRG.18138.5	11	5	5	1.97024e-10	1.5379e-08
Os02g0652100	MSTRG.28731.1	11	8	6	4.23458e-11	4.44671e-09
Os02g0652100	MSTRG.12363.1	11	5	4	1.08138e-07	5.04727e-06
Os02g0652100	MSTRG.13425.1	11	9	5	2.4188e-08	1.23609e-06
Os02g0652100	MSTRG.10479.20	11	8	3	0.000113675	0.00159153
Os02g0652100	MSTRG.7228.1	11	5	3	2.07788e-05	0.000350149
Os02g0652100	MSTRG.30385.1	11	9	5	2.4188e-08	1.23609e-06
Os02g0652100	MSTRG.4974.5	11	11	7	3.20954e-12	4.96308e-10
Os02g0652100	MSTRG.18092.1	11	6	3	4.12355e-05	0.000636821
Os02g0652100	MSTRG.18092.2	11	6	3	4.12355e-05	0.000636821
Os02g0652100	MSTRG.37830.3	11	5	3	2.07788e-05	0.000350149
Os02g0652100	MSTRG.39751.1	11	6	6	1.52922e-12	2.97213e-10
Os02g0652100	MSTRG.41404.1	11	5	3	2.07788e-05	0.000350149
Os02g0652100	MSTRG.37830.1	11	5	3	2.07788e-05	0.000350149
Os02g0652100	MSTRG.36015.1	11	9	6	1.26331e-10	1.07658e-08
Os02g0652100	MSTRG.18138.2	11	5	5	1.97024e-10	1.5379e-08
Os02g0652100	MSTRG.4623.1	11	8	6	4.23458e-11	4.44671e-09
Os02g0652100	MSTRG.18138.1	11	5	5	1.97024e-10	1.5379e-08
Os02g0652100	MSTRG.35372.1	11	6	6	1.52922e-12	2.97213e-10
Os02g0652100	MSTRG.11969.1	11	7	6	1.06456e-11	1.31773e-09
Os02g0652100	MSTRG.32050.2	11	7	3	7.16026e-05	0.00105116
Os02g0652100	MSTRG.18138.4	11	5	5	1.97024e-10	1.5379e-08
Os02g0652100	MSTRG.29433.1	11	5	5	1.97024e-10	1.5379e-08
Os02g0652100	MSTRG.32391.1	11	15	5	5.54336e-07	2.33379e-05
Os02g0652100	MSTRG.18138.3	11	5	5	1.97024e-10	1.5379e-08
Os02g0652100	MSTRG.37715.1	11	9	6	1.26331e-10	1.07658e-08
Os01g0910200	MSTRG.18092.1	4	6	3	1.02027e-06	4.1501e-05
Os10g0420800	MSTRG.14982.1	15	5	4	4.45435e-07	1.92709e-05
Os10g0420800	MSTRG.18092.1	15	6	4	1.3211e-06	5.26333e-05
Os04g0556500	MSTRG.2694.1	3	4	3	5.11622e-08	2.45861e-06
Os11g0199700	MSTRG.32391.1	9	15	5	1.54508e-07	6.96223e-06
Os06g0494701	MSTRG.1947.1	10	5	3	1.51413e-05	0.000272248
Os06g0494701	MSTRG.17830.1	10	9	4	1.69319e-06	6.6501e-05
Os06g0187050	MSTRG.5637.1	16	23	6	2.21022e-06	7.51858e-05
Os01g0608900	MSTRG.5637.1	15	23	14	0	0
Os08g0116900	MSTRG.28732.3	5	5	5	4.26437e-13	9.44856e-11
Os10g0571200	MSTRG.32391.1	6	15	5	7.60108e-09	4.35508e-07
Os07g0629900	MSTRG.41603.1	5	7	5	8.95561e-12	1.13296e-09
Os08g0200600	MSTRG.10925.8	6	5	4	4.94094e-09	2.91161e-07
Os08g0200600	MSTRG.29052.1	6	5	5	2.55873e-12	4.01937e-10
Os08g0377150	MSTRG.42754.2	5	5	3	1.27411e-06	5.08524e-05
Os01g0841050	MSTRG.32391.1	4	15	3	2.30085e-05	0.000385793
Os02g0237801	MSTRG.1947.1	11	5	4	1.08138e-07	5.04727e-06
Os02g0237801	MSTRG.42754.2	11	5	4	1.08138e-07	5.04727e-06
Os02g0237801	MSTRG.17830.1	11	9	3	0.00016919	0.00229622
Os03g0227400	MSTRG.5637.1	11	23	7	2.25638e-09	1.41171e-07
Os03g0125650	MSTRG.1947.1	15	5	3	5.6853e-05	0.000854359
Os03g0125650	MSTRG.17830.1	15	9	4	1.07224e-05	0.000194506
Os07g0169100	MSTRG.42754.2	9	5	5	5.37337e-11	5.05706e-09
Os06g0580100	MSTRG.14982.1	11	5	4	1.08138e-07	5.04727e-06
Os06g0580100	MSTRG.32391.1	11	15	7	6.14502e-11	5.68667e-09
Os02g0176100	MSTRG.5637.1	27	23	6	6.60988e-05	0.000984525
Os02g0176100	MSTRG.42754.2	27	5	4	5.65517e-06	0.000126076
Os06g0561501	MSTRG.11355.1	9	4	4	8.31798e-09	4.75704e-07
Os06g0177600	MSTRG.18092.1	8	6	3	1.41183e-05	0.000255065
Os12g0616000	MSTRG.14982.1	8	5	3	7.09353e-06	0.000156813
Os12g0616000	MSTRG.32391.1	8	15	6	4.54656e-10	3.34837e-08
Os11g0446000	MSTRG.41603.1	5	7	4	1.15169e-08	6.44628e-07
Os04g0650700	MSTRG.34501.1	5	3	3	1.27905e-07	5.79381e-06
Os04g0650700	MSTRG.41715.1	5	3	3	1.27905e-07	5.79381e-06
Os01g0243800	MSTRG.42754.2	7	5	3	4.44208e-06	9.98208e-05
Os05g0571400	MSTRG.17830.1	5	9	4	4.1375e-08	2.05285e-06
Os04g0432200	MSTRG.18092.1	8	6	4	6.87442e-08	3.2564e-06
Os10g0399901	MSTRG.18092.1	9	6	3	2.11157e-05	0.000354555
Os01g0805975	MSTRG.17830.1	10	9	4	1.69319e-06	6.6501e-05
Os01g0805975	MSTRG.32391.1	10	15	5	3.05673e-07	1.34229e-05
Os06g0109000	MSTRG.18092.1	6	6	3	5.07175e-06	0.000113118
Os12g0568350	MSTRG.42754.2	11	5	3	2.07788e-05	0.000350149
Os12g0568350	MSTRG.18092.1	11	6	4	3.22064e-07	1.4063e-05
Os07g0151650	MSTRG.5637.1	11	23	10	6.66134e-16	3.03873e-13
Os01g0700100	MSTRG.23319.1	11	14	10	0	0
Os03g0708400	MSTRG.18092.1	5	6	4	4.94094e-09	2.91161e-07
Os01g0296900	MSTRG.14982.1	14	5	4	3.26993e-07	1.42662e-05
Os01g0296900	MSTRG.32391.1	14	15	9	3.51941e-14	1.13958e-11
Os07g0562800	MSTRG.41603.1	3	7	3	4.47669e-07	1.92709e-05
Os03g0170400	MSTRG.14982.1	12	5	4	1.62038e-07	7.26566e-06
Os03g0170400	MSTRG.32391.1	12	15	9	3.9968e-15	1.54975e-12
Os03g0655000	MSTRG.42754.2	4	5	3	5.10631e-07	2.15155e-05
Os01g0891601	MSTRG.18092.1	5	6	3	2.54327e-06	7.51858e-05
Os01g0850050	MSTRG.5637.2	3	23	3	2.2652e-05	0.000380105
Os01g0850050	MSTRG.5637.1	3	23	3	2.2652e-05	0.000380105
Os04g0555000	MSTRG.28732.3	8	5	5	2.38817e-11	2.55274e-09
Os03g0145900	MSTRG.18092.1	6	6	3	5.07175e-06	0.000113118
Os12g0545600	MSTRG.5637.1	7	23	7	7.35823e-12	1.08898e-09
Os01g0274601	MSTRG.32391.1	11	15	7	6.14502e-11	5.68667e-09
Os08g0430050	MSTRG.32391.1	8	15	3	0.000307405	0.00333723
Os08g0434150	MSTRG.10925.8	5	5	3	1.27411e-06	5.08524e-05
Os08g0434150	MSTRG.29052.1	5	5	4	1.64869e-09	1.05709e-07
Os04g0414300	MSTRG.23319.1	10	14	10	0	0
Os06g0216966	MSTRG.1947.1	10	5	4	6.88866e-08	3.2564e-06
Os06g0216966	MSTRG.17830.1	10	9	5	1.32509e-08	7.00715e-07
Os06g0136201	MSTRG.1947.1	14	5	4	3.26993e-07	1.42662e-05
Os06g0136201	MSTRG.17830.1	14	9	3	0.000366742	0.00333723
Os08g0494400	MSTRG.42754.2	10	5	5	1.07467e-10	9.36935e-09
Os07g0466200	MSTRG.41603.1	6	7	6	2.30926e-14	7.7693e-12
Os12g0614900	MSTRG.41603.1	4	7	4	2.31055e-09	1.43863e-07
Os07g0542701	MSTRG.17830.1	6	9	4	1.23483e-07	5.72729e-06
Os08g0162066	MSTRG.17830.1	9	9	5	6.65425e-09	3.85819e-07
Os01g0715800	MSTRG.41603.1	13	7	4	1.60634e-06	6.32338e-05
Os01g0715800	MSTRG.32391.1	13	15	4	5.81146e-05	0.000872811
Os01g0530400	MSTRG.18092.1	8	6	4	6.87442e-08	3.2564e-06
Os11g0501000	MSTRG.14982.1	4	5	4	3.30078e-10	2.46129e-08
