# Supplementary material for: Research on lncRNA related to drought resistance of Shanlan upland rice
Source: BMC Genomics. 2022 Apr 30;23:336. doi: 10.1186/s12864-022-08546-0 (PMC9055766; doi:10.1186/s12864-022-08546-0)
Supplement: Supplementary file 12 — Additional file 12: Table S012. Accession number of SRA. [file 12864_2022_8546_MOESM12_ESM.xlsx]

## Sheet: Sheet1
Table S012 Accession number of SRA
Accession	BioProject	BioSample	Library ID	Files
SRR17439325	PRJNA793928	SAMN24593563	miR-CK1	CK123-1_FRRN210131075-1a_raw.fq.gz
SRR17439324	PRJNA793928	SAMN24593564	miR-CK2	CK123-2_FRRN210131077-1a_raw.fq.gz
SRR17439323	PRJNA793928	SAMN24593565	miR-CK3	CK123-3_raw.fq.gz
SRR17439330	PRJNA793928	SAMN24593560	miR-D1	D123-1_FRRN210131078-1a_raw.fq.gz
SRR17439329	PRJNA793928	SAMN24593561	miR-D2	D123-2_FRRN210131079-1a_raw.fq.gz
SRR17439326	PRJNA793928	SAMN24593562	miR-D3	D123-3_FRRN210131080-1a_raw.fq.gz
SRR17439319	PRJNA793928	SAMN24593557	Strand-CK1	CK123-1_BRRL210002182-1A_1.fq.gz
				CK123-1_BRRL210002182-1A_2.fq.gz
SRR17439328	PRJNA793928	SAMN24593558	Strand-CK2	CK123-2_BRRL210002183-1A_1.fq.gz
				CK123-2_BRRL210002183-1A_2.fq.gz
SRR17439327	PRJNA793928	SAMN24593559	Strand-CK3	CK123-3_BRRL210004687-1A_1.fq.gz
				CK123-3_BRRL210004687-1A_2.fq.gz
SRR17439322	PRJNA793928	SAMN24593554	Strand-D1	D123-1_BRRL210002184-1A_1.fq.gz
				D123-1_BRRL210002184-1A_2.fq.gz
SRR17439321	PRJNA793928	SAMN24593555	Strand-D2	D123-2_BRRL210002185-1A_1.fq.gz
				D123-2_BRRL210002185-1A_2.fq.gz
SRR17439320	PRJNA793928	SAMN24593556	Strand-D3	D123-3_BRRL210002186-1A_1.fq.gz
				D123-3_BRRL210002186-1A_2.fq.gz
